# Supplementary material for: Biologistics—Diffusion coefficients for complete proteome of Escherichia coli
Source: PubMed Central journal article supplement (PMC3496334; doi:10.1093/bioinformatics/bts537), 2012-08-31
Supplement: supp_bts537_Table_S1.pdf [file supp_bts537_Table_S1.pdf]

Table S1: The diffusion coefficients of proteins from the proteome of K12 strain of *E. coli*. Table contains Uniprot database accession number, protein name, location in the cell, information about the quaternary structure (monomer, multimer or, for membrane proteins, complex with translocation proteins), diffusion coefficient in water at temperatures of 20, 30, and 37 Celsius degrees (293, 303, and 310 K), and the diffusion coefficients in the cytosol, at same temperatures.

| UniProtKB A. N. | Protein name | Subcellular location | Subunit                                           | $D_0 \left( \frac{\mu\text{m}^2}{\text{s}} \right)$ |       |       | $D_{\text{cyto}} \left( \frac{\mu\text{m}^2}{\text{s}} \right)$ |       |       |
|-----------------|--------------|----------------------|---------------------------------------------------|-----------------------------------------------------|-------|-------|-----------------------------------------------------------------|-------|-------|
|                 |              |                      |                                                   | 310 K                                               | 303 K | 293 K | 310 K                                                           | 303 K | 293 K |
| P46482          | AaeA         | Cell inner membrane  | Monomer                                           | 105.8                                               | 89.4  | 69.1  | 8.0                                                             | 6.8   | 5.2   |
|                 |              |                      | Complex with SecB                                 | 68.9                                                | 56.3  | 45.0  | 2.7                                                             | 2.2   | 1.8   |
|                 |              |                      | Complex with TF (Tig)                             | 75.3                                                | 63.6  | 49.1  | 3.5                                                             | 2.9   | 2.3   |
| P46481          | AaeB         | Cell inner membrane  | Monomer                                           | 78.9                                                | 66.6  | 51.5  | 3.9                                                             | 3.3   | 2.5   |
|                 |              |                      | Complex with SecB                                 | 60.9                                                | 49.7  | 39.7  | 2.0                                                             | 1.6   | 1.3   |
|                 |              |                      | Complex with TF (Tig)                             | 64.8                                                | 54.7  | 42.3  | 2.3                                                             | 2.0   | 1.5   |
| P67662          | AaeR         |                      | Monomer                                           | 106.2                                               | 89.7  | 69.3  | 8.1                                                             | 6.8   | 5.3   |
| P46478          | AaeX         | Cell membrane        | Monomer                                           | 189.7                                               | 160.3 | 123.8 | 28.3                                                            | 23.9  | 18.5  |
|                 |              |                      | Complex with SecB                                 | 77.5                                                | 63.3  | 50.6  | 3.7                                                             | 3.0   | 2.4   |
|                 |              |                      | Complex with TF (Tig)                             | 87.8                                                | 74.2  | 57.3  | 5.1                                                             | 4.3   | 3.3   |
| P31119          | Aas          | Cell inner membrane  | Monomer                                           | 76.1                                                | 64.3  | 49.7  | 3.6                                                             | 3.0   | 2.3   |
|                 |              |                      | Complex with SecB                                 | 59.7                                                | 48.8  | 39.0  | 1.8                                                             | 1.5   | 1.2   |
|                 |              |                      | Complex with TF (Tig)                             | 63.3                                                | 53.5  | 41.3  | 2.2                                                             | 1.8   | 1.4   |
| P0A8P1          | Aat          | Cytoplasm            | Monomer                                           | 117.5                                               | 99.3  | 76.7  | 10.2                                                            | 8.6   | 6.7   |
| P77357          | AbgA         |                      | Monomer                                           | 94.4                                                | 79.7  | 61.6  | 6.1                                                             | 5.2   | 4.0   |
| P76052          | AbgB         |                      | Monomer                                           | 90.3                                                | 76.3  | 58.9  | 5.5                                                             | 4.6   | 3.6   |
| P77744          | AbgR         |                      | Monomer                                           | 106.7                                               | 90.1  | 69.6  | 8.2                                                             | 6.9   | 5.3   |
| P46133          | AbgT         | Cell inner membrane  | Monomer                                           | 88.5                                                | 74.8  | 57.8  | 5.2                                                             | 4.4   | 3.4   |
|                 |              |                      | Complex with SecB                                 | 64.3                                                | 52.5  | 42.0  | 2.3                                                             | 1.9   | 1.5   |
|                 |              |                      | Complex with TF (Tig)                             | 69.1                                                | 58.4  | 45.1  | 2.8                                                             | 2.3   | 1.8   |
| P75747          | AbrB         | Cell inner membrane  | Monomer                                           | 103.4                                               | 87.4  | 67.5  | 7.6                                                             | 6.4   | 5.0   |
|                 |              |                      | Complex with SecB                                 | 68.4                                                | 55.9  | 44.6  | 2.7                                                             | 2.2   | 1.7   |
|                 |              |                      | Complex with TF (Tig)                             | 74.5                                                | 63.0  | 48.6  | 3.4                                                             | 2.8   | 2.2   |
| P0ABD5          | AccA         | Cytoplasm            | Monomer                                           | 105.3                                               | 89.0  | 68.7  | 7.9                                                             | 6.7   | 5.2   |
|                 |              |                      | Heterohexamer (AccB–AccC–AccA <sub>2</sub> –AccD) | 56.8                                                | 48.0  | 37.1  | 1.6                                                             | 1.4   | 1.1   |

| UniProtKB A. N. | Protein name | Subcellular location | Subunit                                           | $D_0 \left( \frac{\mu\text{m}^2}{\text{s}} \right)$ |       |       | $D_{\text{cyto}} \left( \frac{\mu\text{m}^2}{\text{s}} \right)$ |       |       |
|-----------------|--------------|----------------------|---------------------------------------------------|-----------------------------------------------------|-------|-------|-----------------------------------------------------------------|-------|-------|
|                 |              |                      |                                                   | 310 K                                               | 303 K | 293 K | 310 K                                                           | 303 K | 293 K |
| P0ABD8          | AccB         |                      | Monomer                                           | 141.1                                               | 119.2 | 92.1  | 15.3                                                            | 13.0  | 10.0  |
|                 |              |                      | Homodimer                                         | 107.6                                               | 87.9  | 70.2  | 8.3                                                             | 6.8   | 5.4   |
|                 |              |                      | Heterohexamer (AccB–AccC–AccA <sub>2</sub> –AccD) | 56.8                                                | 48.0  | 37.1  | 1.6                                                             | 1.4   | 1.1   |
| P24182          | AccC         |                      | Monomer                                           | 92.3                                                | 78.0  | 60.2  | 5.8                                                             | 4.9   | 3.8   |
|                 |              |                      | Heterohexamer (AccB–AccC–AccA <sub>2</sub> –AccD) | 56.8                                                | 48.0  | 37.1  | 1.6                                                             | 1.4   | 1.1   |
| P0A9Q5          | AccD         | Cytoplasm            | Monomer                                           | 107.6                                               | 90.9  | 70.2  | 8.3                                                             | 7.0   | 5.4   |
|                 |              |                      | Heterohexamer (AccB–AccC–AccA <sub>2</sub> –AccD) | 56.8                                                | 48.0  | 37.1  | 1.6                                                             | 1.4   | 1.1   |
| P0A9G6          | AceA         | Cytoplasm            | Monomer                                           | 93.6                                                | 79.1  | 61.1  | 6.0                                                             | 5.1   | 3.9   |
|                 |              |                      | Homotetramer                                      | 54.4                                                | 44.4  | 35.5  | 1.4                                                             | 1.2   | 0.9   |
| P08997          | AceB         | Cytoplasm            | Monomer                                           | 85.3                                                | 72.1  | 55.7  | 4.8                                                             | 4.0   | 3.1   |
| P0AFG8          | AceE         |                      | Monomer                                           | 70.0                                                | 59.2  | 45.7  | 2.9                                                             | 2.4   | 1.9   |
|                 |              |                      | Homodimer                                         | 53.4                                                | 43.6  | 34.8  | 1.3                                                             | 1.1   | 0.9   |
| P06959          | AceF         |                      | Monomer                                           | 82.3                                                | 69.5  | 53.7  | 4.3                                                             | 3.7   | 2.8   |
| P11071          | AceK         | Cytoplasm            | Monomer                                           | 81.5                                                | 68.9  | 53.2  | 4.2                                                             | 3.6   | 2.8   |
| P0A6A3          | AckA         | Cytoplasm            | Monomer                                           | 97.1                                                | 82.1  | 63.4  | 6.5                                                             | 5.5   | 4.3   |
|                 |              |                      | Homodimer                                         | 74.0                                                | 60.5  | 48.3  | 3.3                                                             | 2.7   | 2.2   |
| P25516          | AcnA         |                      | Monomer                                           | 70.6                                                | 59.6  | 46.1  | 2.9                                                             | 2.5   | 1.9   |
| P36683          | AcnB         |                      | Monomer                                           | 71.8                                                | 60.7  | 46.9  | 3.1                                                             | 2.6   | 2.0   |
| P21515          | AcpH         |                      | Monomer                                           | 124.5                                               | 105.2 | 81.3  | 11.6                                                            | 9.8   | 7.6   |
| P0A6A8          | AcpP         | Cytoplasm            | Monomer                                           | 182.7                                               | 154.3 | 119.2 | 26.3                                                            | 22.2  | 17.1  |
| P24224          | AcpS         | Cytoplasm            | Monomer                                           | 151.0                                               | 127.6 | 98.5  | 17.7                                                            | 15.0  | 11.6  |
|                 |              |                      | Homodimer                                         | 115.1                                               | 94.0  | 75.1  | 9.7                                                             | 7.9   | 6.3   |
| P37623          | AcpT         |                      | Monomer                                           | 127.2                                               | 107.4 | 83.0  | 12.2                                                            | 10.3  | 8.0   |
| P0AE06          | AcrA         | Cell inner membrane  | Monomer                                           | 98.1                                                | 82.9  | 64.0  | 6.7                                                             | 5.7   | 4.4   |
|                 |              |                      | Complex with SecB                                 | 67.1                                                | 54.8  | 43.8  | 2.5                                                             | 2.1   | 1.7   |
|                 |              |                      | Complex with TF (Tig)                             | 72.8                                                | 61.5  | 47.5  | 3.2                                                             | 2.7   | 2.1   |
| P31224          | AcrB         | Cell inner membrane  | Monomer                                           | 66.6                                                | 56.2  | 43.4  | 2.5                                                             | 2.1   | 1.6   |
|                 |              |                      | Complex with SecB                                 | 55.2                                                | 45.1  | 36.0  | 1.5                                                             | 1.2   | 1.0   |
|                 |              |                      | Complex with TF (Tig)                             | 57.9                                                | 48.9  | 37.8  | 1.7                                                             | 1.4   | 1.1   |
| P24177          | AcrD         | Cell inner membrane  | Monomer                                           | 66.7                                                | 56.3  | 43.5  | 2.5                                                             | 2.1   | 1.6   |
|                 |              |                      | Complex with SecB                                 | 55.3                                                | 45.2  | 36.1  | 1.5                                                             | 1.2   | 1.0   |

| UniProtKB A. N. | Protein name | Subcellular location | Subunit               | $D_0 \left( \frac{\mu\text{m}^2}{\text{s}} \right)$ |       |       | $D_{\text{cyto}} \left( \frac{\mu\text{m}^2}{\text{s}} \right)$ |       |       |
|-----------------|--------------|----------------------|-----------------------|-----------------------------------------------------|-------|-------|-----------------------------------------------------------------|-------|-------|
|                 |              |                      |                       | 310 K                                               | 303 K | 293 K | 310 K                                                           | 303 K | 293 K |
|                 |              |                      | Complex with TF (Tig) | 58.0                                                | 49.0  | 37.9  | 1.7                                                             | 1.4   | 1.1   |
| P24180          | AcrE         | Cell inner membrane  | Monomer               | 98.9                                                | 83.6  | 64.6  | 6.8                                                             | 5.8   | 4.5   |
|                 |              |                      | Complex with SecB     | 67.3                                                | 55.0  | 43.9  | 2.6                                                             | 2.1   | 1.7   |
|                 |              |                      | Complex with TF (Tig) | 73.1                                                | 61.7  | 47.7  | 3.2                                                             | 2.7   | 2.1   |
|                 |              |                      | Monomer               | 67.0                                                | 56.6  | 43.8  | 2.5                                                             | 2.1   | 1.7   |
| P24181          | AcrF         | Cell inner membrane  | Complex with SecB     | 55.5                                                | 45.3  | 36.2  | 1.5                                                             | 1.2   | 1.0   |
|                 |              |                      | Complex with TF (Tig) | 58.2                                                | 49.2  | 38.0  | 1.7                                                             | 1.5   | 1.1   |
|                 |              |                      | Monomer               | 120.9                                               | 102.1 | 78.9  | 10.9                                                            | 9.2   | 7.1   |
| P0ACS9          | AcrR         |                      | Monomer               | 79.5                                                | 67.2  | 51.9  | 4.0                                                             | 3.4   | 2.6   |
| P27550          | Acs          |                      | Monomer               | 85.9                                                | 72.6  | 56.1  | 4.8                                                             | 4.1   | 3.2   |
| P32705          | ActP         | Cell inner membrane  | Complex with SecB     | 63.4                                                | 51.8  | 41.4  | 2.2                                                             | 1.8   | 1.4   |
|                 |              |                      | Complex with TF (Tig) | 68.0                                                | 57.5  | 44.4  | 2.6                                                             | 2.2   | 1.7   |
|                 |              |                      | Monomer               | 100.9                                               | 85.2  | 65.8  | 7.2                                                             | 6.0   | 4.7   |
| P06134          | Ada          |                      | Monomer               | 104.0                                               | 87.8  | 67.8  | 7.7                                                             | 6.5   | 5.0   |
| P22333          | Add          |                      | Monomer               | 83.5                                                | 70.5  | 54.5  | 4.5                                                             | 3.8   | 2.9   |
| P31441          | Ade          |                      | Homodimer             | 63.6                                                | 52.0  | 41.5  | 2.2                                                             | 1.8   | 1.4   |
|                 |              |                      | Monomer               | 71.0                                                | 60.0  | 46.4  | 3.0                                                             | 2.5   | 1.9   |
| P0A9Q7          | AdhE         |                      | Monomer               | 105.1                                               | 88.8  | 68.6  | 7.9                                                             | 6.7   | 5.1   |
| P39451          | AdhP         |                      | Monomer               | 74.8                                                | 63.2  | 48.8  | 3.4                                                             | 2.9   | 2.2   |
|                 |              |                      | Homodecamer           | 30.3                                                | 24.8  | 19.8  | 0.2                                                             | 0.2   | 0.1   |
| P60061          | AdiC         | Cell inner membrane  | Monomer               | 94.2                                                | 79.6  | 61.5  | 6.1                                                             | 5.1   | 4.0   |
|                 |              |                      | Complex with SecB     | 66.0                                                | 53.9  | 43.1  | 2.4                                                             | 2.0   | 1.6   |
|                 |              |                      | Complex with TF (Tig) | 71.4                                                | 60.3  | 46.6  | 3.0                                                             | 2.5   | 2.0   |
| P33234          | AdiY         |                      | Monomer               | 113.6                                               | 96.0  | 74.2  | 9.5                                                             | 8.0   | 6.2   |
| P69441          | Adk          | Cytoplasm            | Monomer               | 123.2                                               | 104.1 | 80.4  | 11.4                                                            | 9.6   | 7.4   |
| P0AAP1          | AdrA         | Cell inner membrane  | Monomer               | 98.7                                                | 83.4  | 64.4  | 6.8                                                             | 5.7   | 4.4   |
|                 |              |                      | Complex with SecB     | 67.2                                                | 54.9  | 43.9  | 2.6                                                             | 2.1   | 1.7   |
|                 |              |                      | Complex with TF (Tig) | 73.0                                                | 61.7  | 47.6  | 3.2                                                             | 2.7   | 2.1   |
| P76261          | AdrB         |                      | Monomer               | 85.6                                                | 72.3  | 55.9  | 4.8                                                             | 4.1   | 3.1   |
| P37127          | AegA         |                      | Monomer               | 79.6                                                | 67.3  | 52.0  | 4.0                                                             | 3.4   | 2.6   |
| P50466          | Aer          | Cell inner membrane  | Monomer               | 88.4                                                | 74.7  | 57.7  | 5.2                                                             | 4.4   | 3.4   |

| UniProtKB A. N. | Protein name | Subcellular location | Subunit               | $D_0 \left( \frac{\mu\text{m}^2}{\text{s}} \right)$ |       |       | $D_{\text{cyto}} \left( \frac{\mu\text{m}^2}{\text{s}} \right)$ |       |       |
|-----------------|--------------|----------------------|-----------------------|-----------------------------------------------------|-------|-------|-----------------------------------------------------------------|-------|-------|
|                 |              |                      |                       | 310 K                                               | 303 K | 293 K | 310 K                                                           | 303 K | 293 K |
|                 |              |                      | Complex with SecB     | 64.3                                                | 52.5  | 41.9  | 2.3                                                             | 1.9   | 1.5   |
|                 |              |                      | Complex with TF (Tig) | 69.1                                                | 58.4  | 45.1  | 2.8                                                             | 2.3   | 1.8   |
| P23872          | Aes          | Cytoplasm            | Monomer               | 104.4                                               | 88.2  | 68.1  | 7.8                                                             | 6.6   | 5.1   |
|                 |              |                      | Homodimer             | 79.5                                                | 65.0  | 51.9  | 4.0                                                             | 3.3   | 2.6   |
| P42906          | AgaA         |                      | Monomer               | 138.5                                               | 117.0 | 90.4  | 14.7                                                            | 12.4  | 9.6   |
| P42909          | AgaB         | Cytoplasm            | Monomer               | 138.2                                               | 116.7 | 90.2  | 14.6                                                            | 12.4  | 9.6   |
|                 |              |                      | Monomer               | 114.2                                               | 96.5  | 74.5  | 9.6                                                             | 8.1   | 6.2   |
| P42910          | AgaC         | Cell inner membrane  | Complex with SecB     | 70.6                                                | 57.7  | 46.1  | 2.9                                                             | 2.4   | 1.9   |
|                 |              |                      | Complex with TF (Tig) | 77.6                                                | 65.5  | 50.6  | 3.7                                                             | 3.2   | 2.4   |
|                 |              |                      | Monomer               | 113.6                                               | 96.0  | 74.2  | 9.5                                                             | 8.0   | 6.2   |
| P42911          | AgaD         | Cell inner membrane  | Complex with SecB     | 70.5                                                | 57.6  | 46.0  | 2.9                                                             | 2.4   | 1.9   |
|                 |              |                      | Complex with TF (Tig) | 77.4                                                | 65.4  | 50.5  | 3.7                                                             | 3.1   | 2.4   |
| P42912          | AgaI         |                      | Monomer               | 115.7                                               | 97.7  | 75.5  | 9.8                                                             | 8.3   | 6.4   |
| P0ACK2          | AgaR         |                      | Monomer               | 112.8                                               | 95.3  | 73.6  | 9.3                                                             | 7.9   | 6.1   |
| P42907          | AgaS         |                      | Monomer               | 98.5                                                | 83.2  | 64.3  | 6.8                                                             | 5.7   | 4.4   |
| P42904          | AgaV         | Cytoplasm            | Monomer               | 139.8                                               | 118.1 | 91.3  | 15.0                                                            | 12.7  | 9.8   |
|                 |              |                      | Monomer               | 152.4                                               | 128.7 | 99.4  | 18.1                                                            | 15.3  | 11.8  |
| P42905          | AgaW         | Cell inner membrane  | Complex with SecB     | 75.3                                                | 61.5  | 49.1  | 3.5                                                             | 2.8   | 2.3   |
|                 |              |                      | Complex with TF (Tig) | 84.4                                                | 71.3  | 55.1  | 4.6                                                             | 3.9   | 3.0   |
|                 |              |                      | Monomer               | 95.1                                                | 80.3  | 62.1  | 6.2                                                             | 5.2   | 4.1   |
| P19926          | Agp          | Periplasm            | Complex with SecB     | 66.3                                                | 54.1  | 43.2  | 2.5                                                             | 2.0   | 1.6   |
|                 |              |                      | Complex with TF (Tig) | 71.7                                                | 60.6  | 46.8  | 3.0                                                             | 2.6   | 2.0   |
|                 |              |                      | Monomer               | 129.6                                               | 109.5 | 84.5  | 12.7                                                            | 10.7  | 8.3   |
| P0AE08          | AhpC         |                      | Homodimer             | 98.7                                                | 80.7  | 64.4  | 6.8                                                             | 5.6   | 4.4   |
|                 |              |                      | Monomer               | 87.7                                                | 74.1  | 57.2  | 5.1                                                             | 4.3   | 3.3   |
| P35340          | AhpF         |                      | Homodimer             | 66.8                                                | 54.6  | 43.6  | 2.5                                                             | 2.1   | 1.6   |
|                 |              |                      | Monomer               | 85.1                                                | 71.9  | 55.6  | 4.7                                                             | 4.0   | 3.1   |
| P33224          | AidB         | Cytoplasm            | Homotetramer          | 49.4                                                | 40.4  | 32.3  | 1.1                                                             | 0.9   | 0.7   |
|                 |              |                      | Monomer               | 126.1                                               | 106.5 | 82.3  | 12.0                                                            | 10.1  | 7.8   |
| P45565          | Ais          | Periplasm            | Complex with SecB     | 72.5                                                | 59.2  | 47.3  | 3.1                                                             | 2.6   | 2.0   |
|                 |              |                      | Complex with TF (Tig) | 80.3                                                | 67.8  | 52.4  | 4.1                                                             | 3.4   | 2.7   |

| UniProtKB A. N. | Protein name | Subcellular location | Subunit               | $D_0 \left( \frac{\mu\text{m}^2}{\text{s}} \right)$ |       |       | $D_{\text{cyto}} \left( \frac{\mu\text{m}^2}{\text{s}} \right)$ |       |       |
|-----------------|--------------|----------------------|-----------------------|-----------------------------------------------------|-------|-------|-----------------------------------------------------------------|-------|-------|
|                 |              |                      |                       | 310 K                                               | 303 K | 293 K | 310 K                                                           | 303 K | 293 K |
| P00957          | AlaS         | Cytoplasm            | Monomer               | 71.1                                                | 60.0  | 46.4  | 3.0                                                             | 2.5   | 1.9   |
|                 |              |                      | Homotetramer          | 41.3                                                | 33.7  | 26.9  | 0.6                                                             | 0.5   | 0.4   |
| P25553          | AldA         |                      | Monomer               | 90.2                                                | 76.2  | 58.9  | 5.5                                                             | 4.6   | 3.6   |
|                 |              |                      | Homotetramer          | 52.4                                                | 42.8  | 34.2  | 1.3                                                             | 1.0   | 0.8   |
| P37685          | AldB         |                      | Monomer               | 87.6                                                | 74.0  | 57.2  | 5.1                                                             | 4.3   | 3.3   |
|                 |              |                      | Homotetramer          | 50.9                                                | 41.6  | 33.2  | 1.2                                                             | 1.0   | 0.8   |
| P04395          | AlkA         |                      | Monomer               | 110.2                                               | 93.1  | 71.9  | 8.8                                                             | 7.4   | 5.7   |
| P05050          | AlkB         |                      | Monomer               | 122.3                                               | 103.3 | 79.8  | 11.2                                                            | 9.4   | 7.3   |
| P77731          | AllA         |                      | Monomer               | 136.5                                               | 115.3 | 89.1  | 14.3                                                            | 12.0  | 9.3   |
|                 |              |                      | Homodimer             | 104.0                                               | 85.0  | 67.9  | 7.7                                                             | 6.3   | 5.0   |
| P77671          | AllB         |                      | Monomer               | 92.1                                                | 77.8  | 60.1  | 5.7                                                             | 4.9   | 3.7   |
|                 |              |                      | Homotetramer          | 53.5                                                | 43.7  | 34.9  | 1.4                                                             | 1.1   | 0.9   |
| P77425          | AllC         |                      | Monomer               | 95.1                                                | 80.3  | 62.1  | 6.2                                                             | 5.2   | 4.1   |
|                 |              |                      | Homodimer             | 72.5                                                | 59.2  | 47.3  | 3.1                                                             | 2.6   | 2.0   |
| P77555          | AllD         | Cytoplasm            | Monomer               | 102.3                                               | 86.4  | 66.7  | 7.4                                                             | 6.2   | 4.8   |
| P0ACN4          | AllR         |                      | Monomer               | 113.2                                               | 95.7  | 73.9  | 9.4                                                             | 7.9   | 6.1   |
|                 |              |                      | Homodimer             | 86.3                                                | 70.5  | 56.3  | 4.9                                                             | 4.0   | 3.2   |
|                 |              |                      | Homotetramer          | 65.8                                                | 55.6  | 42.9  | 2.4                                                             | 2.0   | 1.6   |
| P0ACR0          | AllS         |                      | Monomer               | 106.2                                               | 89.7  | 69.3  | 8.1                                                             | 6.8   | 5.3   |
| P33997          | AlpA         |                      | Monomer               | 187.1                                               | 158.0 | 122.1 | 27.6                                                            | 23.3  | 18.0  |
| P0A6B4          | Alr          |                      | Monomer               | 101.0                                               | 85.4  | 65.9  | 7.2                                                             | 6.1   | 4.7   |
| P32721          | AlsA         | Cell inner membrane  | Monomer               | 87.4                                                | 73.8  | 57.0  | 5.0                                                             | 4.3   | 3.3   |
|                 |              |                      | Complex with SecB     | 63.9                                                | 52.2  | 41.7  | 2.2                                                             | 1.8   | 1.5   |
|                 |              |                      | Complex with TF (Tig) | 68.6                                                | 58.0  | 44.8  | 2.7                                                             | 2.3   | 1.8   |
| P39265          | AlsB         | Periplasm            | Monomer               | 108.2                                               | 91.4  | 70.6  | 8.4                                                             | 7.1   | 5.5   |
|                 |              |                      | Complex with SecB     | 69.4                                                | 56.7  | 45.3  | 2.8                                                             | 2.3   | 1.8   |
|                 |              |                      | Complex with TF (Tig) | 75.9                                                | 64.2  | 49.6  | 3.5                                                             | 3.0   | 2.3   |
| P32720          | AlsC         | Cell inner membrane  | Monomer               | 106.4                                               | 89.9  | 69.4  | 8.1                                                             | 6.9   | 5.3   |
|                 |              |                      | Complex with SecB     | 69.0                                                | 56.4  | 45.1  | 2.7                                                             | 2.2   | 1.8   |
|                 |              |                      | Complex with TF (Tig) | 75.4                                                | 63.7  | 49.2  | 3.5                                                             | 2.9   | 2.3   |
| P32719          | AlsE         |                      | Monomer               | 118.4                                               | 100.0 | 77.3  | 10.4                                                            | 8.8   | 6.8   |

| UniProtKB A. N. | Protein name | Subcellular location | Subunit               | $D_0 \left( \frac{\mu\text{m}^2}{\text{s}} \right)$ |       |       | $D_{\text{cyto}} \left( \frac{\mu\text{m}^2}{\text{s}} \right)$ |       |       |
|-----------------|--------------|----------------------|-----------------------|-----------------------------------------------------|-------|-------|-----------------------------------------------------------------|-------|-------|
|                 |              |                      |                       | 310 K                                               | 303 K | 293 K | 310 K                                                           | 303 K | 293 K |
|                 |              |                      | Homohexamer           | 58.7                                                | 47.9  | 38.3  | 1.8                                                             | 1.4   | 1.1   |
| P32718          | AlsK         |                      | Monomer               | 107.0                                               | 90.4  | 69.8  | 8.2                                                             | 6.9   | 5.4   |
|                 |              |                      | Monomer               | 104.5                                               | 88.3  | 68.2  | 7.8                                                             | 6.6   | 5.1   |
| P42601          | Alx          | Cell inner membrane  | Complex with SecB     | 68.6                                                | 56.1  | 44.8  | 2.7                                                             | 2.2   | 1.8   |
|                 |              |                      | Complex with TF (Tig) | 74.9                                                | 63.3  | 48.9  | 3.4                                                             | 2.9   | 2.2   |
|                 |              |                      | Monomer               | 110.1                                               | 93.1  | 71.9  | 8.8                                                             | 7.4   | 5.7   |
| P36548          | AmiA         | Periplasm            | Complex with SecB     | 69.8                                                | 57.0  | 45.6  | 2.8                                                             | 2.3   | 1.8   |
|                 |              |                      | Complex with TF (Tig) | 76.5                                                | 64.6  | 49.9  | 3.6                                                             | 3.0   | 2.4   |
|                 |              |                      | Monomer               | 93.3                                                | 78.8  | 60.9  | 5.9                                                             | 5.0   | 3.9   |
| P26365          | AmiB         | Periplasm            | Complex with SecB     | 65.8                                                | 53.7  | 42.9  | 2.4                                                             | 2.0   | 1.6   |
|                 |              |                      | Complex with TF (Tig) | 71.0                                                | 60.0  | 46.4  | 3.0                                                             | 2.5   | 1.9   |
|                 |              |                      | Monomer               | 95.1                                                | 80.4  | 62.1  | 6.2                                                             | 5.3   | 4.1   |
| P63883          | AmiC         | Periplasm            | Complex with SecB     | 66.3                                                | 54.2  | 43.3  | 2.5                                                             | 2.0   | 1.6   |
|                 |              |                      | Complex with TF (Tig) | 71.7                                                | 60.6  | 46.8  | 3.0                                                             | 2.6   | 2.0   |
|                 |              |                      | Monomer               | 110.6                                               | 93.5  | 72.2  | 8.9                                                             | 7.5   | 5.8   |
| P75820          | AmiD         | Cell outer membrane  | Complex with SecB     | 69.9                                                | 57.1  | 45.6  | 2.8                                                             | 2.3   | 1.9   |
|                 |              |                      | Complex with TF (Tig) | 76.6                                                | 64.7  | 50.0  | 3.6                                                             | 3.1   | 2.4   |
| P0AE12          | Amn          |                      | Monomer               | 89.1                                                | 75.3  | 58.1  | 5.3                                                             | 4.5   | 3.5   |
|                 |              |                      | Monomer               | 98.7                                                | 83.4  | 64.4  | 6.8                                                             | 5.7   | 4.4   |
| P00811          | AmpC         | Periplasm            | Complex with SecB     | 67.2                                                | 54.9  | 43.9  | 2.6                                                             | 2.1   | 1.7   |
|                 |              |                      | Complex with TF (Tig) | 73.0                                                | 61.7  | 47.6  | 3.2                                                             | 2.7   | 2.1   |
| P13016          | AmpD         | Cytoplasm            | Monomer               | 130.1                                               | 109.9 | 84.9  | 12.8                                                            | 10.8  | 8.4   |
|                 |              |                      | Monomer               | 109.2                                               | 92.2  | 71.2  | 8.6                                                             | 7.3   | 5.6   |
| P0AE14          | AmpE         | Cell inner membrane  | Complex with SecB     | 69.6                                                | 56.9  | 45.4  | 2.8                                                             | 2.3   | 1.8   |
|                 |              |                      | Complex with TF (Tig) | 76.2                                                | 64.4  | 49.7  | 3.6                                                             | 3.0   | 2.3   |
|                 |              |                      | Monomer               | 89.6                                                | 75.7  | 58.4  | 5.4                                                             | 4.5   | 3.5   |
| P0AE16          | AmpG         | Cell inner membrane  | Complex with SecB     | 64.6                                                | 52.8  | 42.2  | 2.3                                                             | 1.9   | 1.5   |
|                 |              |                      | Complex with TF (Tig) | 69.6                                                | 58.8  | 45.4  | 2.8                                                             | 2.4   | 1.8   |
| P0AD70          | AmpH         |                      | Monomer               | 98.4                                                | 83.2  | 64.2  | 6.7                                                             | 5.7   | 4.4   |
|                 |              |                      | Monomer               | 96.1                                                | 81.2  | 62.7  | 6.4                                                             | 5.4   | 4.2   |
| P69681          | AmtB         | Cell inner membrane  | Complex with SecB     | 66.5                                                | 54.4  | 43.4  | 2.5                                                             | 2.0   | 1.6   |

| UniProtKB A. N. | Protein name | Subcellular location | Subunit               | $D_0 \left( \frac{\mu\text{m}^2}{\text{s}} \right)$ |       |       | $D_{\text{cyto}} \left( \frac{\mu\text{m}^2}{\text{s}} \right)$ |       |       |
|-----------------|--------------|----------------------|-----------------------|-----------------------------------------------------|-------|-------|-----------------------------------------------------------------|-------|-------|
|                 |              |                      |                       | 310 K                                               | 303 K | 293 K | 310 K                                                           | 303 K | 293 K |
|                 |              |                      | Complex with TF (Tig) | 72.1                                                | 60.9  | 47.0  | 3.1                                                             | 2.6   | 2.0   |
| P26612          | AmyA         | Cytoplasm            | Monomer               | 87.4                                                | 73.9  | 57.0  | 5.1                                                             | 4.3   | 3.3   |
| P77570          | AnmK         |                      | Monomer               | 100.7                                               | 85.1  | 65.7  | 7.1                                                             | 6.0   | 4.6   |
| P0A962          | AnsA         | Cytoplasm            | Monomer               | 103.2                                               | 87.2  | 67.3  | 7.5                                                             | 6.4   | 4.9   |
|                 |              |                      | Homotetramer          | 59.9                                                | 48.9  | 39.1  | 1.9                                                             | 1.5   | 1.2   |
| P00805          | AnsB         | Periplasm            | Monomer               | 103.5                                               | 87.4  | 67.5  | 7.6                                                             | 6.4   | 5.0   |
|                 |              |                      | Complex with SecB     | 68.4                                                | 55.9  | 44.6  | 2.7                                                             | 2.2   | 1.7   |
|                 |              |                      | Complex with TF (Tig) | 74.5                                                | 63.0  | 48.6  | 3.4                                                             | 2.8   | 2.2   |
| P77610          | AnsP         | Cell inner membrane  | Monomer               | 88.9                                                | 75.1  | 58.0  | 5.3                                                             | 4.5   | 3.4   |
|                 |              |                      | Complex with SecB     | 64.4                                                | 52.6  | 42.0  | 2.3                                                             | 1.9   | 1.5   |
|                 |              |                      | Complex with TF (Tig) | 69.3                                                | 58.5  | 45.2  | 2.8                                                             | 2.3   | 1.8   |
| P62672          | ApaG         |                      | Monomer               | 151.8                                               | 128.2 | 99.0  | 17.9                                                            | 15.1  | 11.7  |
| P05637          | ApaH         |                      | Monomer               | 110.3                                               | 93.2  | 72.0  | 8.8                                                             | 7.5   | 5.8   |
| P0AB85          | ApbE         | Cell membrane        | Monomer               | 101.7                                               | 85.9  | 66.3  | 7.3                                                             | 6.2   | 4.8   |
|                 |              |                      | Complex with SecB     | 68.0                                                | 55.5  | 44.3  | 2.6                                                             | 2.2   | 1.7   |
|                 |              |                      | Complex with TF (Tig) | 74.0                                                | 62.5  | 48.3  | 3.3                                                             | 2.8   | 2.2   |
| P0AE22          | AphA         | Periplasm            | Monomer               | 118.4                                               | 100.1 | 77.3  | 10.4                                                            | 8.8   | 6.8   |
|                 |              |                      | Complex with SecB     | 71.3                                                | 58.3  | 46.5  | 3.0                                                             | 2.4   | 2.0   |
|                 |              |                      | Complex with TF (Tig) | 78.6                                                | 66.4  | 51.3  | 3.9                                                             | 3.3   | 2.5   |
| P07102          | AppA         | Periplasm            | Monomer               | 94.0                                                | 79.4  | 61.3  | 6.0                                                             | 5.1   | 3.9   |
|                 |              |                      | Complex with SecB     | 66.0                                                | 53.9  | 43.0  | 2.4                                                             | 2.0   | 1.6   |
|                 |              |                      | Complex with TF (Tig) | 71.3                                                | 60.2  | 46.5  | 3.0                                                             | 2.5   | 2.0   |
| P26458          | AppB         | Cell inner membrane  | Monomer               | 97.9                                                | 82.7  | 63.9  | 6.7                                                             | 5.6   | 4.3   |
|                 |              |                      | Complex with SecB     | 67.0                                                | 54.8  | 43.7  | 2.5                                                             | 2.1   | 1.7   |
|                 |              |                      | Complex with TF (Tig) | 72.7                                                | 61.4  | 47.4  | 3.2                                                             | 2.7   | 2.1   |
| P26459          | AppC         | Cell inner membrane  | Monomer               | 86.7                                                | 73.2  | 56.5  | 4.9                                                             | 4.2   | 3.2   |
|                 |              |                      | Complex with SecB     | 63.7                                                | 52.0  | 41.6  | 2.2                                                             | 1.8   | 1.4   |
|                 |              |                      | Complex with TF (Tig) | 68.3                                                | 57.7  | 44.6  | 2.7                                                             | 2.3   | 1.7   |
| P05052          | AppY         |                      | Monomer               | 114.0                                               | 96.3  | 74.4  | 9.5                                                             | 8.0   | 6.2   |
| P69503          | Apt          | Cytoplasm            | Monomer               | 131.8                                               | 111.4 | 86.0  | 13.2                                                            | 11.2  | 8.6   |
|                 |              |                      | Homodimer             | 100.5                                               | 82.1  | 65.6  | 7.1                                                             | 5.8   | 4.6   |

| UniProtKB A. N. | Protein name | Subcellular location | Subunit               | $D_0 \left( \frac{\mu\text{m}^2}{\text{s}} \right)$ |       |       | $D_{\text{cyto}} \left( \frac{\mu\text{m}^2}{\text{s}} \right)$ |       |       |
|-----------------|--------------|----------------------|-----------------------|-----------------------------------------------------|-------|-------|-----------------------------------------------------------------|-------|-------|
|                 |              |                      |                       | 310 K                                               | 303 K | 293 K | 310 K                                                           | 303 K | 293 K |
| P60844          | AqpZ         | Cell inner membrane  | Monomer               | 123.0                                               | 103.9 | 80.3  | 11.3                                                            | 9.6   | 7.4   |
|                 |              |                      | Complex with SecB     | 72.0                                                | 58.8  | 47.0  | 3.1                                                             | 2.5   | 2.0   |
|                 |              |                      | Complex with TF (Tig) | 79.6                                                | 67.3  | 52.0  | 4.0                                                             | 3.4   | 2.6   |
| P08202          | AraA         |                      | Monomer               | 87.8                                                | 74.1  | 57.3  | 5.1                                                             | 4.3   | 3.3   |
|                 |              |                      | Homoheptamer          | 43.5                                                | 35.5  | 28.4  | 0.7                                                             | 0.6   | 0.5   |
| P08204          | AraB         |                      | Monomer               | 84.9                                                | 71.7  | 55.4  | 4.7                                                             | 4.0   | 3.1   |
| P0A9E0          | AraC         | Cytoplasm            | Monomer               | 107.5                                               | 90.9  | 70.2  | 8.3                                                             | 7.0   | 5.4   |
|                 |              |                      | Homodimer             | 82.0                                                | 67.0  | 53.5  | 4.3                                                             | 3.5   | 2.8   |
| P08203          | AraD         |                      | Monomer               | 119.5                                               | 100.9 | 78.0  | 10.6                                                            | 9.0   | 6.9   |
|                 |              |                      | Homotetramer          | 69.4                                                | 56.7  | 45.3  | 2.8                                                             | 2.3   | 1.8   |
| P0AE24          | AraE         | Cell inner membrane  | Monomer               | 90.6                                                | 76.6  | 59.1  | 5.5                                                             | 4.7   | 3.6   |
|                 |              |                      | Complex with SecB     | 65.0                                                | 53.1  | 42.4  | 2.3                                                             | 1.9   | 1.5   |
|                 |              |                      | Complex with TF (Tig) | 70.0                                                | 59.1  | 45.7  | 2.9                                                             | 2.4   | 1.9   |
| P02924          | AraF         | Periplasm            | Monomer               | 104.9                                               | 88.7  | 68.5  | 7.9                                                             | 6.6   | 5.1   |
|                 |              |                      | Complex with SecB     | 68.7                                                | 56.1  | 44.8  | 2.7                                                             | 2.2   | 1.8   |
|                 |              |                      | Complex with TF (Tig) | 75.0                                                | 63.4  | 48.9  | 3.4                                                             | 2.9   | 2.2   |
| P0AAF3          | AraG         | Cell inner membrane  | Monomer               | 88.4                                                | 74.7  | 57.7  | 5.2                                                             | 4.4   | 3.4   |
|                 |              |                      | Complex with SecB     | 64.3                                                | 52.5  | 41.9  | 2.3                                                             | 1.9   | 1.5   |
|                 |              |                      | Complex with TF (Tig) | 69.1                                                | 58.4  | 45.1  | 2.8                                                             | 2.3   | 1.8   |
| P0AE26          | AraH         | Cell inner membrane  | Monomer               | 106.5                                               | 90.0  | 69.5  | 8.1                                                             | 6.9   | 5.3   |
|                 |              |                      | Complex with SecB     | 69.1                                                | 56.4  | 45.1  | 2.8                                                             | 2.2   | 1.8   |
|                 |              |                      | Complex with TF (Tig) | 75.5                                                | 63.8  | 49.2  | 3.5                                                             | 2.9   | 2.3   |
| P23910          | AraJ         | Cell inner membrane  | Monomer               | 98.4                                                | 83.1  | 64.2  | 6.7                                                             | 5.7   | 4.4   |
|                 |              |                      | Complex with SecB     | 67.1                                                | 54.9  | 43.8  | 2.6                                                             | 2.1   | 1.7   |
|                 |              |                      | Complex with TF (Tig) | 72.9                                                | 61.6  | 47.6  | 3.2                                                             | 2.7   | 2.1   |
| P0A9Q1          | ArcA         | Cytoplasm            | Monomer               | 116.4                                               | 98.3  | 75.9  | 10.0                                                            | 8.4   | 6.5   |
| P0AEC3          | ArcB         | Cell inner membrane  | Monomer               | 73.6                                                | 62.1  | 48.0  | 3.3                                                             | 2.7   | 2.1   |
|                 |              |                      | Complex with SecB     | 58.6                                                | 47.9  | 38.2  | 1.8                                                             | 1.4   | 1.1   |
|                 |              |                      | Complex with TF (Tig) | 62.0                                                | 52.4  | 40.4  | 2.1                                                             | 1.7   | 1.3   |
| P37306          | ArcC         | Cytoplasm            | Monomer               | 109.8                                               | 92.8  | 71.7  | 8.7                                                             | 7.4   | 5.7   |
|                 |              |                      | Homodimer             | 83.7                                                | 68.4  | 54.6  | 4.5                                                             | 3.7   | 3.0   |



| UniProtKB A. N. | Protein name | Subcellular location | Subunit               | $D_0 \left( \frac{\mu\text{m}^2}{\text{s}} \right)$ |       |       | $D_{\text{cyto}} \left( \frac{\mu\text{m}^2}{\text{s}} \right)$ |       |       |
|-----------------|--------------|----------------------|-----------------------|-----------------------------------------------------|-------|-------|-----------------------------------------------------------------|-------|-------|
|                 |              |                      |                       | 310 K                                               | 303 K | 293 K | 310 K                                                           | 303 K | 293 K |
| P0A6C5          | ArgA         | Cytoplasm            | Monomer               | 92.4                                                | 78.0  | 60.3  | 5.8                                                             | 4.9   | 3.8   |
|                 |              |                      | Homohexamer           | 45.8                                                | 37.4  | 29.9  | 0.9                                                             | 0.7   | 0.6   |
| P0A6C8          | ArgB         | Cytoplasm            | Monomer               | 116.6                                               | 98.5  | 76.1  | 10.0                                                            | 8.5   | 6.5   |
|                 |              |                      | Homodimer             | 88.9                                                | 72.6  | 58.0  | 5.3                                                             | 4.3   | 3.4   |
| P11446          | ArgC         | Cytoplasm            | Monomer               | 104.5                                               | 88.3  | 68.2  | 7.8                                                             | 6.6   | 5.1   |
| P18335          | ArgD         | Cytoplasm            | Monomer               | 96.7                                                | 81.7  | 63.1  | 6.5                                                             | 5.5   | 4.2   |
|                 |              |                      | Homodimer             | 73.7                                                | 60.2  | 48.1  | 3.3                                                             | 2.7   | 2.1   |
| P23908          | ArgE         | Cytoplasm            | Monomer               | 98.0                                                | 82.8  | 63.9  | 6.7                                                             | 5.6   | 4.4   |
|                 |              |                      | Homodimer             | 74.7                                                | 61.0  | 48.7  | 3.4                                                             | 2.8   | 2.2   |
| P06960          | ArgF         | Cytoplasm            | Monomer               | 103.5                                               | 87.4  | 67.5  | 7.6                                                             | 6.4   | 5.0   |
| P0A6E4          | ArgG         | Cytoplasm            | Monomer               | 91.9                                                | 77.6  | 60.0  | 5.7                                                             | 4.8   | 3.7   |
|                 |              |                      | Homotetramer          | 53.4                                                | 43.6  | 34.8  | 1.3                                                             | 1.1   | 0.9   |
| P11447          | ArgH         | Cytoplasm            | Monomer               | 91.6                                                | 77.4  | 59.8  | 5.7                                                             | 4.8   | 3.7   |
| P04391          | ArgI         | Cytoplasm            | Monomer               | 103.4                                               | 87.4  | 67.5  | 7.6                                                             | 6.4   | 5.0   |
| P27254          | ArgK         | Cell inner membrane  | Monomer               | 103.6                                               | 87.5  | 67.6  | 7.6                                                             | 6.4   | 5.0   |
|                 |              |                      | Complex with SecB     | 68.4                                                | 55.9  | 44.7  | 2.7                                                             | 2.2   | 1.8   |
|                 |              |                      | Complex with TF (Tig) | 74.6                                                | 63.0  | 48.7  | 3.4                                                             | 2.8   | 2.2   |
| P11667          | ArgO         | Cell inner membrane  | Monomer               | 124.1                                               | 104.8 | 81.0  | 11.5                                                            | 9.8   | 7.5   |
|                 |              |                      | Complex with SecB     | 72.2                                                | 59.0  | 47.1  | 3.1                                                             | 2.5   | 2.0   |
|                 |              |                      | Complex with TF (Tig) | 79.8                                                | 67.5  | 52.1  | 4.0                                                             | 3.4   | 2.6   |
| P0A6D0          | ArgR         | Cytoplasm            | Monomer               | 140.1                                               | 118.4 | 91.4  | 15.1                                                            | 12.8  | 9.9   |
|                 |              |                      | Homohexamer           | 69.4                                                | 56.7  | 45.3  | 2.8                                                             | 2.3   | 1.8   |
| P11875          | ArgS         | Cytoplasm            | Monomer               | 83.0                                                | 70.1  | 54.2  | 4.4                                                             | 3.7   | 2.9   |
| P09551          | ArgT         | Periplasm            | Monomer               | 115.2                                               | 97.4  | 75.2  | 9.8                                                             | 8.2   | 6.4   |
|                 |              |                      | Complex with SecB     | 70.8                                                | 57.8  | 46.2  | 2.9                                                             | 2.4   | 1.9   |
|                 |              |                      | Complex with TF (Tig) | 77.8                                                | 65.8  | 50.8  | 3.8                                                             | 3.2   | 2.5   |
| P75993          | AriR         |                      | Monomer               | 174.6                                               | 147.5 | 114.0 | 24.0                                                            | 20.3  | 15.6  |
|                 |              |                      | Homodimer             | 133.1                                               | 108.7 | 86.8  | 13.5                                                            | 11.0  | 8.8   |
| P77398          | ArnA         |                      | Monomer               | 78.6                                                | 66.4  | 51.3  | 3.9                                                             | 3.3   | 2.5   |
|                 |              |                      | Homohexamer           | 38.9                                                | 31.8  | 25.4  | 0.5                                                             | 0.4   | 0.3   |
| P77690          | ArnB         |                      | Monomer               | 98.6                                                | 83.3  | 64.4  | 6.8                                                             | 5.7   | 4.4   |

| UniProtKB A. N. | Protein name | Subcellular location | Subunit               | $D_0 \left( \frac{\mu\text{m}^2}{\text{s}} \right)$ |       |       | $D_{\text{cyto}} \left( \frac{\mu\text{m}^2}{\text{s}} \right)$ |       |       |
|-----------------|--------------|----------------------|-----------------------|-----------------------------------------------------|-------|-------|-----------------------------------------------------------------|-------|-------|
|                 |              |                      |                       | 310 K                                               | 303 K | 293 K | 310 K                                                           | 303 K | 293 K |
|                 |              |                      | Homodimer             | 75.2                                                | 61.4  | 49.0  | 3.4                                                             | 2.8   | 2.2   |
| P77757          | ArnC         | Cell inner membrane  | Monomer               | 104.0                                               | 87.9  | 67.9  | 7.7                                                             | 6.5   | 5.0   |
|                 |              |                      | Complex with SecB     | 68.5                                                | 56.0  | 44.7  | 2.7                                                             | 2.2   | 1.8   |
|                 |              |                      | Complex with TF (Tig) | 74.7                                                | 63.1  | 48.8  | 3.4                                                             | 2.9   | 2.2   |
|                 |              |                      |                       |                                                     |       |       |                                                                 |       |       |
| P76472          | ArnD         |                      | Monomer               | 107.9                                               | 91.2  | 70.4  | 8.4                                                             | 7.1   | 5.5   |
| Q47377          | ArnE         | Cell inner membrane  | Monomer               | 159.6                                               | 134.9 | 104.2 | 19.9                                                            | 16.8  | 13.0  |
|                 |              |                      | Complex with SecB     | 75.9                                                | 62.0  | 49.5  | 3.5                                                             | 2.9   | 2.3   |
|                 |              |                      | Complex with TF (Tig) | 85.3                                                | 72.0  | 55.6  | 4.7                                                             | 4.0   | 3.1   |
|                 |              |                      |                       |                                                     |       |       |                                                                 |       |       |
| P76474          | ArnF         | Cell inner membrane  | Monomer               | 150.8                                               | 127.4 | 98.4  | 17.7                                                            | 14.9  | 11.5  |
|                 |              |                      | Complex with SecB     | 75.2                                                | 61.4  | 49.1  | 3.4                                                             | 2.8   | 2.2   |
|                 |              |                      | Complex with TF (Tig) | 84.2                                                | 71.2  | 55.0  | 4.6                                                             | 3.9   | 3.0   |
|                 |              |                      |                       |                                                     |       |       |                                                                 |       |       |
| P76473          | ArnT         | Cell inner membrane  | Monomer               | 84.1                                                | 71.0  | 54.9  | 4.6                                                             | 3.9   | 3.0   |
|                 |              |                      | Complex with SecB     | 62.8                                                | 51.3  | 41.0  | 2.1                                                             | 1.7   | 1.4   |
|                 |              |                      | Complex with TF (Tig) | 67.2                                                | 56.8  | 43.9  | 2.6                                                             | 2.2   | 1.7   |
|                 |              |                      |                       |                                                     |       |       |                                                                 |       |       |
| P0A6D3          | AroA         | Cytoplasm            | Monomer               | 94.8                                                | 80.1  | 61.8  | 6.2                                                             | 5.2   | 4.0   |
| P07639          | AroB         | Cytoplasm            | Monomer               | 101.3                                               | 85.6  | 66.1  | 7.2                                                             | 6.1   | 4.7   |
| P12008          | AroC         |                      | Monomer               | 101.1                                               | 85.4  | 65.9  | 7.2                                                             | 6.1   | 4.7   |
|                 |              |                      | Homotetramer          | 58.7                                                | 47.9  | 38.3  | 1.8                                                             | 1.4   | 1.1   |
| P05194          | AroD         |                      | Monomer               | 116.1                                               | 98.1  | 75.8  | 9.9                                                             | 8.4   | 6.5   |
|                 |              |                      | Homodimer             | 88.5                                                | 72.3  | 57.7  | 5.2                                                             | 4.3   | 3.4   |
| P15770          | AroE         |                      | Monomer               | 113.0                                               | 95.5  | 73.8  | 9.3                                                             | 7.9   | 6.1   |
| P00888          | AroF         |                      | Monomer               | 101.4                                               | 85.7  | 66.2  | 7.2                                                             | 6.1   | 4.7   |
| P0AB91          | AroG         |                      | Monomer               | 102.2                                               | 86.4  | 66.7  | 7.4                                                             | 6.2   | 4.8   |
|                 |              |                      | Homotetramer          | 59.4                                                | 48.5  | 38.7  | 1.8                                                             | 1.5   | 1.2   |
| P00887          | AroH         |                      | Monomer               | 101.5                                               | 85.7  | 66.2  | 7.3                                                             | 6.1   | 4.7   |
| P0A6D7          | AroK         | Cytoplasm            | Monomer               | 132.7                                               | 112.1 | 86.6  | 13.4                                                            | 11.3  | 8.7   |
| P0A6E1          | AroL         | Cytoplasm            | Monomer               | 133.7                                               | 113.0 | 87.3  | 13.6                                                            | 11.5  | 8.9   |
| P0AE28          | AroM         |                      | Monomer               | 120.6                                               | 101.9 | 78.7  | 10.8                                                            | 9.2   | 7.1   |
| P15993          | AroP         | Cell inner membrane  | Monomer               | 92.0                                                | 77.7  | 60.0  | 5.7                                                             | 4.8   | 3.7   |
|                 |              |                      | Complex with SecB     | 65.4                                                | 53.4  | 42.7  | 2.4                                                             | 1.9   | 1.6   |
|                 |              |                      | Complex with TF (Tig) | 70.5                                                | 59.6  | 46.0  | 2.9                                                             | 2.5   | 1.9   |
|                 |              |                      |                       |                                                     |       |       |                                                                 |       |       |

| UniProtKB A. N. | Protein name | Subcellular location | Subunit               | $D_0 \left( \frac{\mu\text{m}^2}{\text{s}} \right)$ |       |       | $D_{\text{cyto}} \left( \frac{\mu\text{m}^2}{\text{s}} \right)$ |       |       |
|-----------------|--------------|----------------------|-----------------------|-----------------------------------------------------|-------|-------|-----------------------------------------------------------------|-------|-------|
|                 |              |                      |                       | 310 K                                               | 303 K | 293 K | 310 K                                                           | 303 K | 293 K |
| P23325          | ArpA         |                      | Monomer               | 75.4                                                | 63.7  | 49.2  | 3.5                                                             | 2.9   | 2.3   |
| P76205          | ArpB         |                      | Monomer               | 80.2                                                | 67.7  | 52.3  | 4.1                                                             | 3.4   | 2.7   |
| P78285          | ArrD         |                      | Monomer               | 137.1                                               | 115.8 | 89.5  | 14.4                                                            | 12.2  | 9.4   |
| P76159          | ArrQ         |                      | Monomer               | 132.3                                               | 111.8 | 86.4  | 13.3                                                            | 11.3  | 8.7   |
| P0AB93          | ArsB         | Cell inner membrane  | Monomer               | 95.3                                                | 80.5  | 62.2  | 6.2                                                             | 5.3   | 4.1   |
|                 |              |                      | Complex with SecB     | 66.3                                                | 54.2  | 43.3  | 2.5                                                             | 2.0   | 1.6   |
|                 |              |                      | Complex with TF (Tig) | 71.8                                                | 60.6  | 46.8  | 3.0                                                             | 2.6   | 2.0   |
| P0AB96          | ArsC         |                      | Monomer               | 144.0                                               | 121.7 | 94.0  | 16.0                                                            | 13.5  | 10.4  |
| P37309          | ArsR         |                      | Monomer               | 154.5                                               | 130.5 | 100.8 | 18.6                                                            | 15.7  | 12.1  |
|                 |              |                      | Homodimer             | 117.7                                               | 96.2  | 76.8  | 10.3                                                            | 8.4   | 6.7   |
| P30859          | ArtI         | Periplasm            | Monomer               | 117.0                                               | 98.8  | 76.3  | 10.1                                                            | 8.5   | 6.6   |
|                 |              |                      | Complex with SecB     | 71.1                                                | 58.1  | 46.4  | 3.0                                                             | 2.4   | 1.9   |
|                 |              |                      | Complex with TF (Tig) | 78.3                                                | 66.1  | 51.1  | 3.8                                                             | 3.2   | 2.5   |
| P30860          | ArtJ         | Periplasm            | Monomer               | 117.2                                               | 99.0  | 76.5  | 10.1                                                            | 8.6   | 6.6   |
|                 |              |                      | Complex with SecB     | 71.1                                                | 58.1  | 46.4  | 3.0                                                             | 2.4   | 1.9   |
|                 |              |                      | Complex with TF (Tig) | 78.3                                                | 66.1  | 51.1  | 3.8                                                             | 3.2   | 2.5   |
| P0AE30          | ArtM         | Cell inner membrane  | Monomer               | 120.6                                               | 101.9 | 78.7  | 10.8                                                            | 9.2   | 7.1   |
|                 |              |                      | Complex with SecB     | 71.7                                                | 58.5  | 46.8  | 3.0                                                             | 2.5   | 2.0   |
|                 |              |                      | Complex with TF (Tig) | 79.1                                                | 66.8  | 51.6  | 3.9                                                             | 3.3   | 2.6   |
| P0AAF6          | ArtP         | Cell inner membrane  | Monomer               | 116.8                                               | 98.7  | 76.2  | 10.1                                                            | 8.5   | 6.6   |
|                 |              |                      | Complex with SecB     | 71.0                                                | 58.0  | 46.4  | 3.0                                                             | 2.4   | 1.9   |
|                 |              |                      | Complex with TF (Tig) | 78.2                                                | 66.1  | 51.0  | 3.8                                                             | 3.2   | 2.5   |
| P0AE34          | ArtQ         | Cell inner membrane  | Monomer               | 118.2                                               | 99.9  | 77.2  | 10.4                                                            | 8.7   | 6.8   |
|                 |              |                      | Complex with SecB     | 71.3                                                | 58.2  | 46.5  | 3.0                                                             | 2.4   | 2.0   |
|                 |              |                      | Complex with TF (Tig) | 78.6                                                | 66.4  | 51.3  | 3.9                                                             | 3.3   | 2.5   |
| P24240          | AscB         |                      | Monomer               | 89.1                                                | 75.3  | 58.2  | 5.3                                                             | 4.5   | 3.5   |
| P24241          | AscF         | Cell inner membrane  | Monomer               | 91.1                                                | 76.9  | 59.4  | 5.6                                                             | 4.7   | 3.6   |
|                 |              |                      | Complex with SecB     | 65.1                                                | 53.2  | 42.5  | 2.3                                                             | 1.9   | 1.5   |
|                 |              |                      | Complex with TF (Tig) | 70.2                                                | 59.3  | 45.8  | 2.9                                                             | 2.4   | 1.9   |
| P24242          | AscG         |                      | Monomer               | 103.4                                               | 87.3  | 67.4  | 7.6                                                             | 6.4   | 4.9   |
| P0A9Q9          | Asd          |                      | Monomer               | 100.2                                               | 84.6  | 65.4  | 7.0                                                             | 5.9   | 4.6   |

| UniProtKB A. N. | Protein name | Subcellular location | Subunit               | $D_0 \left( \frac{\mu\text{m}^2}{\text{s}} \right)$ |       |       | $D_{\text{cyto}} \left( \frac{\mu\text{m}^2}{\text{s}} \right)$ |       |       |
|-----------------|--------------|----------------------|-----------------------|-----------------------------------------------------|-------|-------|-----------------------------------------------------------------|-------|-------|
|                 |              |                      |                       | 310 K                                               | 303 K | 293 K | 310 K                                                           | 303 K | 293 K |
|                 |              |                      | Homodimer             | 76.3                                                | 62.4  | 49.8  | 3.6                                                             | 2.9   | 2.3   |
| P25549          | AsIA         | Periplasm            | Monomer               | 85.1                                                | 71.9  | 55.5  | 4.7                                                             | 4.0   | 3.1   |
|                 |              |                      | Complex with SecB     | 63.2                                                | 51.6  | 41.2  | 2.2                                                             | 1.8   | 1.4   |
|                 |              |                      | Complex with TF (Tig) | 67.7                                                | 57.2  | 44.1  | 2.6                                                             | 2.2   | 1.7   |
|                 |              |                      |                       |                                                     |       |       |                                                                 |       |       |
| P25550          | AsIB         |                      | Monomer               | 94.4                                                | 79.8  | 61.6  | 6.1                                                             | 5.2   | 4.0   |
| P28249          | AsmA         | Periplasm            | Monomer               | 80.9                                                | 68.4  | 52.8  | 4.2                                                             | 3.5   | 2.7   |
|                 |              |                      | Complex with SecB     | 61.6                                                | 50.4  | 40.2  | 2.0                                                             | 1.7   | 1.3   |
|                 |              |                      | Complex with TF (Tig) | 65.7                                                | 55.5  | 42.9  | 2.4                                                             | 2.0   | 1.6   |
| P00963          | AsnA         | Cytoplasm            | Monomer               | 103.7                                               | 87.6  | 67.7  | 7.6                                                             | 6.5   | 5.0   |
|                 |              |                      | Homodimer             | 79.0                                                | 64.5  | 51.6  | 3.9                                                             | 3.2   | 2.6   |
| P22106          | AsnB         |                      | Monomer               | 84.0                                                | 71.0  | 54.8  | 4.6                                                             | 3.9   | 3.0   |
|                 |              |                      | Homodimer             | 64.0                                                | 52.3  | 41.8  | 2.2                                                             | 1.8   | 1.5   |
| P0ACI6          | AsnC         |                      | Monomer               | 140.5                                               | 118.7 | 91.7  | 15.2                                                            | 12.8  | 9.9   |
| P0A8M0          | AsnS         | Cytoplasm            | Monomer               | 90.0                                                | 76.0  | 58.7  | 5.4                                                             | 4.6   | 3.5   |
|                 |              |                      | Homodimer             | 68.6                                                | 56.0  | 44.8  | 2.7                                                             | 2.2   | 1.8   |
| P0AC38          | AspA         |                      | Monomer               | 90.2                                                | 76.2  | 58.8  | 5.5                                                             | 4.6   | 3.6   |
|                 |              |                      | Homotetramer          | 52.4                                                | 42.8  | 34.2  | 1.3                                                             | 1.0   | 0.8   |
| P00509          | AspC         | Cytoplasm            | Monomer               | 96.9                                                | 81.9  | 63.2  | 6.5                                                             | 5.5   | 4.2   |
|                 |              |                      | Homodimer             | 73.8                                                | 60.3  | 48.2  | 3.3                                                             | 2.7   | 2.1   |
| P21889          | AspS         | Cytoplasm            | Monomer               | 82.4                                                | 69.6  | 53.8  | 4.4                                                             | 3.7   | 2.8   |
|                 |              |                      | Homodimer             | 62.8                                                | 51.3  | 41.0  | 2.1                                                             | 1.7   | 1.4   |
| P36560          | Asr          | Periplasm            | Monomer               | 168.7                                               | 142.5 | 110.1 | 22.3                                                            | 18.9  | 14.6  |
|                 |              |                      | Complex with SecB     | 76.5                                                | 62.5  | 49.9  | 3.6                                                             | 2.9   | 2.3   |
|                 |              |                      | Complex with TF (Tig) | 86.2                                                | 72.8  | 56.2  | 4.9                                                             | 4.1   | 3.2   |
| P0AE37          | AstA         |                      | Monomer               | 101.7                                               | 86.0  | 66.4  | 7.3                                                             | 6.2   | 4.8   |
| P76216          | AstB         |                      | Monomer               | 92.3                                                | 78.0  | 60.2  | 5.8                                                             | 4.9   | 3.8   |
|                 |              |                      | Homodimer             | 70.3                                                | 57.5  | 45.9  | 2.9                                                             | 2.4   | 1.9   |
| P77581          | AstC         |                      | Monomer               | 96.8                                                | 81.8  | 63.2  | 6.5                                                             | 5.5   | 4.2   |
| P76217          | AstD         |                      | Monomer               | 89.7                                                | 75.8  | 58.5  | 5.4                                                             | 4.5   | 3.5   |
| P76215          | AstE         |                      | Monomer               | 104.6                                               | 88.4  | 68.3  | 7.8                                                             | 6.6   | 5.1   |
| P76459          | AtoA         |                      | Monomer               | 124.5                                               | 105.2 | 81.3  | 11.6                                                            | 9.8   | 7.6   |

| UniProtKB A. N. | Protein name | Subcellular location | Subunit                 | $D_0 \left( \frac{\mu\text{m}^2}{\text{s}} \right)$ |       |       | $D_{\text{cyto}} \left( \frac{\mu\text{m}^2}{\text{s}} \right)$ |       |       |
|-----------------|--------------|----------------------|-------------------------|-----------------------------------------------------|-------|-------|-----------------------------------------------------------------|-------|-------|
|                 |              |                      |                         | 310 K                                               | 303 K | 293 K | 310 K                                                           | 303 K | 293 K |
|                 |              |                      | Heterodimer (AtoA–AtoD) | 94.5                                                | 79.8  | 61.6  | 6.1                                                             | 5.2   | 4.0   |
| P76461          | AtoB         | Cytoplasm            | Monomer                 | 99.8                                                | 84.4  | 65.2  | 7.0                                                             | 5.9   | 4.6   |
| Q06065          | AtoC         | Cytoplasm            | Monomer                 | 90.3                                                | 76.3  | 58.9  | 5.5                                                             | 4.6   | 3.6   |
| P76458          | AtoD         |                      | Monomer                 | 123.4                                               | 104.2 | 80.5  | 11.4                                                            | 9.6   | 7.4   |
|                 |              |                      | Heterodimer (AtoA–AtoD) | 94.5                                                | 79.8  | 61.6  | 6.1                                                             | 5.2   | 4.0   |
| P76460          | AtoE         | Cell inner membrane  | Monomer                 | 93.6                                                | 79.1  | 61.1  | 6.0                                                             | 5.1   | 3.9   |
|                 |              |                      | Complex with SecB       | 65.9                                                | 53.8  | 43.0  | 2.4                                                             | 2.0   | 1.6   |
|                 |              |                      | Complex with TF (Tig)   | 71.2                                                | 60.1  | 46.4  | 3.0                                                             | 2.5   | 1.9   |
| Q06067          | AtoS         | Cell inner membrane  | Monomer                 | 81.5                                                | 68.8  | 53.2  | 4.2                                                             | 3.6   | 2.8   |
|                 |              |                      | Complex with SecB       | 61.9                                                | 50.5  | 40.4  | 2.0                                                             | 1.7   | 1.3   |
|                 |              |                      | Complex with TF (Tig)   | 66.0                                                | 55.8  | 43.1  | 2.4                                                             | 2.1   | 1.6   |
| P0ABB0          | AtpA         | Cell inner membrane  | Monomer                 | 88.3                                                | 74.6  | 57.6  | 5.2                                                             | 4.4   | 3.4   |
|                 |              |                      | Complex with SecB       | 64.2                                                | 52.5  | 41.9  | 2.3                                                             | 1.8   | 1.5   |
|                 |              |                      | Complex with TF (Tig)   | 69.0                                                | 58.3  | 45.1  | 2.8                                                             | 2.3   | 1.8   |
| P0AB98          | AtpB         | Cell inner membrane  | Monomer                 | 111.7                                               | 94.4  | 72.9  | 9.1                                                             | 7.7   | 5.9   |
|                 |              |                      | Complex with SecB       | 70.1                                                | 57.3  | 45.8  | 2.9                                                             | 2.3   | 1.9   |
|                 |              |                      | Complex with TF (Tig)   | 76.9                                                | 65.0  | 50.2  | 3.7                                                             | 3.1   | 2.4   |
| P0A6E6          | AtpC         | Cell inner membrane  | Monomer                 | 146.9                                               | 124.1 | 95.9  | 16.7                                                            | 14.1  | 10.9  |
|                 |              |                      | Complex with SecB       | 74.8                                                | 61.1  | 48.8  | 3.4                                                             | 2.8   | 2.2   |
|                 |              |                      | Complex with TF (Tig)   | 83.7                                                | 70.7  | 54.6  | 4.5                                                             | 3.8   | 3.0   |
| P0ABB4          | AtpD         | Cell inner membrane  | Monomer                 | 91.6                                                | 77.4  | 59.8  | 5.7                                                             | 4.8   | 3.7   |
|                 |              |                      | Complex with SecB       | 65.3                                                | 53.3  | 42.6  | 2.4                                                             | 1.9   | 1.5   |
|                 |              |                      | Complex with TF (Tig)   | 70.4                                                | 59.4  | 45.9  | 2.9                                                             | 2.4   | 1.9   |
| P68699          | AtpE         | Cell inner membrane  | Monomer                 | 186.0                                               | 157.1 | 121.4 | 27.2                                                            | 23.0  | 17.8  |
|                 |              |                      | Complex with SecB       | 77.4                                                | 63.2  | 50.5  | 3.7                                                             | 3.0   | 2.4   |
|                 |              |                      | Complex with TF (Tig)   | 87.5                                                | 74.0  | 57.1  | 5.1                                                             | 4.3   | 3.3   |
| P0ABA0          | AtpF         | Cell inner membrane  | Monomer                 | 139.3                                               | 117.7 | 90.9  | 14.9                                                            | 12.6  | 9.7   |
|                 |              |                      | Complex with SecB       | 74.1                                                | 60.5  | 48.3  | 3.3                                                             | 2.7   | 2.2   |
|                 |              |                      | Complex with TF (Tig)   | 82.6                                                | 69.8  | 53.9  | 4.4                                                             | 3.7   | 2.9   |
| P0ABA6          | AtpG         | Cell inner membrane  | Monomer                 | 109.9                                               | 92.9  | 71.7  | 8.8                                                             | 7.4   | 5.7   |
|                 |              |                      | Complex with SecB       | 69.8                                                | 57.0  | 45.5  | 2.8                                                             | 2.3   | 1.8   |

| UniProtKB A. N. | Protein name | Subcellular location | Subunit               | $D_0 \left( \frac{\mu\text{m}^2}{\text{s}} \right)$ |       |       | $D_{\text{cyto}} \left( \frac{\mu\text{m}^2}{\text{s}} \right)$ |       |       |
|-----------------|--------------|----------------------|-----------------------|-----------------------------------------------------|-------|-------|-----------------------------------------------------------------|-------|-------|
|                 |              |                      |                       | 310 K                                               | 303 K | 293 K | 310 K                                                           | 303 K | 293 K |
|                 |              |                      | Complex with TF (Tig) | 76.4                                                | 64.6  | 49.9  | 3.6                                                             | 3.0   | 2.3   |
| P0ABA4          | AtpH         | Cell inner membrane  | Monomer               | 133.2                                               | 112.6 | 86.9  | 13.5                                                            | 11.4  | 8.8   |
|                 |              |                      | Complex with SecB     | 73.4                                                | 60.0  | 47.9  | 3.2                                                             | 2.6   | 2.1   |
|                 |              |                      | Complex with TF (Tig) | 81.6                                                | 68.9  | 53.2  | 4.2                                                             | 3.6   | 2.8   |
| P0ABC0          | AtpI         | Cell inner membrane  | Monomer               | 152.8                                               | 129.1 | 99.7  | 18.2                                                            | 15.3  | 11.9  |
|                 |              |                      | Complex with SecB     | 75.4                                                | 61.6  | 49.2  | 3.5                                                             | 2.8   | 2.3   |
|                 |              |                      | Complex with TF (Tig) | 84.5                                                | 71.4  | 55.1  | 4.6                                                             | 3.9   | 3.0   |
| P09053          | AvtA         | Cytoplasm            | Monomer               | 94.3                                                | 79.6  | 61.5  | 6.1                                                             | 5.1   | 4.0   |
|                 |              |                      | Homodimer             | 71.8                                                | 58.7  | 46.9  | 3.1                                                             | 2.5   | 2.0   |
| P41407          | AzoR         |                      | Monomer               | 127.4                                               | 107.7 | 83.2  | 12.3                                                            | 10.4  | 8.0   |
|                 |              |                      | Homodimer             | 97.1                                                | 79.3  | 63.4  | 6.5                                                             | 5.3   | 4.3   |
| C1P605          | AzuC         | Membrane             | Monomer               | 263.1                                               | 222.3 | 171.7 | 53.0                                                            | 44.8  | 34.6  |
|                 |              |                      | Complex with SecB     | 79.3                                                | 64.8  | 51.8  | 4.0                                                             | 3.2   | 2.6   |
|                 |              |                      | Complex with TF (Tig) | 90.7                                                | 76.6  | 59.2  | 5.5                                                             | 4.7   | 3.6   |
| P75688          | Unnamed      |                      | Monomer               | 189.7                                               | 160.2 | 123.8 | 28.3                                                            | 23.9  | 18.5  |
| P75971          | Unnamed      | Cell membrane        | Monomer               | 166.4                                               | 140.6 | 108.6 | 21.7                                                            | 18.3  | 14.2  |
|                 |              |                      | Complex with SecB     | 76.3                                                | 62.4  | 49.8  | 3.6                                                             | 2.9   | 2.3   |
|                 |              |                      | Complex with TF (Tig) | 85.9                                                | 72.6  | 56.1  | 4.8                                                             | 4.1   | 3.2   |
| P11291          | Unnamed      |                      | Monomer               | 139.0                                               | 117.5 | 90.7  | 14.8                                                            | 12.5  | 9.7   |
| P08339          | Unnamed      |                      | Monomer               | 168.7                                               | 142.5 | 110.1 | 22.3                                                            | 18.9  | 14.6  |
| Q47719          | Unnamed      |                      | Monomer               | 146.9                                               | 124.1 | 95.9  | 16.7                                                            | 14.1  | 10.9  |
| P69228          | BaeR         | Cytoplasm            | Monomer               | 115.8                                               | 97.8  | 75.6  | 9.9                                                             | 8.3   | 6.4   |
| P30847          | BaeS         | Cell inner membrane  | Monomer               | 90.4                                                | 76.4  | 59.0  | 5.5                                                             | 4.6   | 3.6   |
|                 |              |                      | Complex with SecB     | 64.9                                                | 53.0  | 42.4  | 2.3                                                             | 1.9   | 1.5   |
|                 |              |                      | Complex with TF (Tig) | 69.9                                                | 59.1  | 45.6  | 2.8                                                             | 2.4   | 1.9   |
| P0AEC5          | BarA         | Cell inner membrane  | Monomer               | 69.3                                                | 58.5  | 45.2  | 2.8                                                             | 2.3   | 1.8   |
|                 |              |                      | Complex with SecB     | 56.6                                                | 46.3  | 36.9  | 1.6                                                             | 1.3   | 1.0   |
|                 |              |                      | Complex with TF (Tig) | 59.6                                                | 50.3  | 38.9  | 1.8                                                             | 1.6   | 1.2   |
| P30843          | BasR         | Cytoplasm            | Monomer               | 120.4                                               | 101.7 | 78.6  | 10.8                                                            | 9.1   | 7.0   |
|                 |              |                      | Homodimer             | 91.8                                                | 75.0  | 59.9  | 5.7                                                             | 4.6   | 3.7   |
| P30844          | BasS         | Cell inner membrane  | Monomer               | 99.2                                                | 83.8  | 64.7  | 6.9                                                             | 5.8   | 4.5   |

| UniProtKB A. N. | Protein name | Subcellular location | Subunit               | $D_0 \left( \frac{\mu\text{m}^2}{\text{s}} \right)$ |       |       | $D_{\text{cyto}} \left( \frac{\mu\text{m}^2}{\text{s}} \right)$ |       |       |
|-----------------|--------------|----------------------|-----------------------|-----------------------------------------------------|-------|-------|-----------------------------------------------------------------|-------|-------|
|                 |              |                      |                       | 310 K                                               | 303 K | 293 K | 310 K                                                           | 303 K | 293 K |
|                 |              |                      | Complex with SecB     | 67.4                                                | 55.0  | 44.0  | 2.6                                                             | 2.1   | 1.7   |
|                 |              |                      | Complex with TF (Tig) | 73.2                                                | 61.8  | 47.7  | 3.2                                                             | 2.7   | 2.1   |
| P27297          | Bax          |                      | Monomer               | 110.9                                               | 93.7  | 72.4  | 8.9                                                             | 7.6   | 5.8   |
| P0AE52          | Bcp          |                      | Monomer               | 138.1                                               | 116.7 | 90.1  | 14.6                                                            | 12.4  | 9.5   |
|                 |              |                      | Monomer               | 97.1                                                | 82.0  | 63.3  | 6.5                                                             | 5.5   | 4.3   |
| P28246          | Bcr          | Cell inner membrane  | Complex with SecB     | 66.8                                                | 54.6  | 43.6  | 2.5                                                             | 2.1   | 1.6   |
|                 |              |                      | Complex with TF (Tig) | 72.4                                                | 61.2  | 47.3  | 3.1                                                             | 2.6   | 2.0   |
|                 |              |                      | Monomer               | 70.0                                                | 59.2  | 45.7  | 2.9                                                             | 2.4   | 1.9   |
| P37653          | BcsA         | Cell inner membrane  | Complex with SecB     | 57.0                                                | 46.5  | 37.2  | 1.6                                                             | 1.3   | 1.1   |
|                 |              |                      | Complex with TF (Tig) | 60.0                                                | 50.7  | 39.1  | 1.9                                                             | 1.6   | 1.2   |
|                 |              |                      | Monomer               | 74.2                                                | 62.7  | 48.4  | 3.3                                                             | 2.8   | 2.2   |
| P37652          | BcsB         | Cell inner membrane  | Complex with SecB     | 58.9                                                | 48.1  | 38.4  | 1.8                                                             | 1.5   | 1.2   |
|                 |              |                      | Complex with TF (Tig) | 62.3                                                | 52.7  | 40.7  | 2.1                                                             | 1.8   | 1.4   |
| P37650          | BcsC         |                      | Monomer               | 63.6                                                | 53.7  | 41.5  | 2.2                                                             | 1.9   | 1.4   |
|                 |              |                      | Monomer               | 98.6                                                | 83.3  | 64.3  | 6.8                                                             | 5.7   | 4.4   |
| P37651          | BcsZ         | Secreted             | Complex with SecB     | 67.2                                                | 54.9  | 43.9  | 2.6                                                             | 2.1   | 1.7   |
|                 |              |                      | Complex with TF (Tig) | 72.9                                                | 61.6  | 47.6  | 3.2                                                             | 2.7   | 2.1   |
| P76127          | Bdm          |                      | Monomer               | 188.4                                               | 159.2 | 122.9 | 27.9                                                            | 23.6  | 18.2  |
|                 |              |                      | Monomer               | 84.4                                                | 71.3  | 55.1  | 4.6                                                             | 3.9   | 3.0   |
| P17444          | BetA         | Cell membrane        | Complex with SecB     | 62.9                                                | 51.4  | 41.1  | 2.1                                                             | 1.7   | 1.4   |
|                 |              |                      | Complex with TF (Tig) | 67.4                                                | 56.9  | 44.0  | 2.6                                                             | 2.2   | 1.7   |
|                 |              |                      | Monomer               | 89.8                                                | 75.9  | 58.6  | 5.4                                                             | 4.6   | 3.5   |
| P17445          | BetB         |                      | Homotetramer          | 52.1                                                | 42.6  | 34.0  | 1.3                                                             | 1.0   | 0.8   |
| P17446          | BetI         |                      | Monomer               | 127.1                                               | 107.4 | 82.9  | 12.2                                                            | 10.3  | 7.9   |
|                 |              |                      | Monomer               | 78.0                                                | 65.9  | 50.9  | 3.8                                                             | 3.2   | 2.5   |
| P0ABC9          | BetT         | Cell inner membrane  | Complex with SecB     | 60.5                                                | 49.4  | 39.5  | 1.9                                                             | 1.6   | 1.3   |
|                 |              |                      | Complex with TF (Tig) | 64.3                                                | 54.3  | 42.0  | 2.3                                                             | 1.9   | 1.5   |
| P0AE56          | Bfd          |                      | Monomer               | 194.5                                               | 164.3 | 126.9 | 29.8                                                            | 25.2  | 19.4  |
| P0ABD3          | Bfr          |                      | Monomer               | 135.6                                               | 114.5 | 88.5  | 14.0                                                            | 11.9  | 9.2   |
| Q46829          | BglA         |                      | Monomer               | 88.2                                                | 74.5  | 57.6  | 5.2                                                             | 4.4   | 3.4   |
| P11988          | BglB         |                      | Monomer               | 89.6                                                | 75.7  | 58.5  | 5.4                                                             | 4.5   | 3.5   |

| UniProtKB A. N. | Protein name | Subcellular location | Subunit               | $D_0 \left( \frac{\mu\text{m}^2}{\text{s}} \right)$ |       |       | $D_{\text{cyto}} \left( \frac{\mu\text{m}^2}{\text{s}} \right)$ |       |       |
|-----------------|--------------|----------------------|-----------------------|-----------------------------------------------------|-------|-------|-----------------------------------------------------------------|-------|-------|
|                 |              |                      |                       | 310 K                                               | 303 K | 293 K | 310 K                                                           | 303 K | 293 K |
| P08722          | BglF         | Cell inner membrane  | Monomer               | 82.1                                                | 69.4  | 53.6  | 4.3                                                             | 3.6   | 2.8   |
|                 |              |                      | Complex with SecB     | 62.1                                                | 50.7  | 40.5  | 2.1                                                             | 1.7   | 1.3   |
|                 |              |                      | Complex with TF (Tig) | 66.3                                                | 56.0  | 43.3  | 2.5                                                             | 2.1   | 1.6   |
| P11989          | BglG         |                      | Monomer               | 109.2                                               | 92.3  | 71.3  | 8.6                                                             | 7.3   | 5.6   |
| P26218          | BglH         | Cell outer membrane  | Monomer               | 85.1                                                | 71.9  | 55.5  | 4.7                                                             | 4.0   | 3.1   |
|                 |              |                      | Complex with SecB     | 63.2                                                | 51.6  | 41.2  | 2.2                                                             | 1.8   | 1.4   |
|                 |              |                      | Complex with TF (Tig) | 67.7                                                | 57.2  | 44.2  | 2.6                                                             | 2.2   | 1.7   |
| P39404          | BglJ         |                      | Monomer               | 119.3                                               | 100.8 | 77.9  | 10.6                                                            | 8.9   | 6.9   |
| P33363          | BglX         | Periplasm            | Monomer               | 75.1                                                | 63.4  | 49.0  | 3.4                                                             | 2.9   | 2.2   |
|                 |              |                      | Complex with SecB     | 59.3                                                | 48.4  | 38.7  | 1.8                                                             | 1.5   | 1.2   |
|                 |              |                      | Complex with TF (Tig) | 62.8                                                | 53.1  | 41.0  | 2.1                                                             | 1.8   | 1.4   |
| P0AB40          | BhsA         | Periplasm            | Monomer               | 181.3                                               | 153.1 | 118.3 | 25.9                                                            | 21.8  | 16.9  |
|                 |              |                      | Complex with SecB     | 77.1                                                | 63.0  | 50.3  | 3.7                                                             | 3.0   | 2.4   |
|                 |              |                      | Complex with TF (Tig) | 87.2                                                | 73.7  | 56.9  | 5.0                                                             | 4.2   | 3.3   |
| P12995          | BioA         | Cytoplasm            | Monomer               | 93.8                                                | 79.2  | 61.2  | 6.0                                                             | 5.1   | 3.9   |
|                 |              |                      | Homodimer             | 71.5                                                | 58.4  | 46.6  | 3.0                                                             | 2.5   | 2.0   |
| P12996          | BioB         |                      | Monomer               | 101.5                                               | 85.8  | 66.3  | 7.3                                                             | 6.1   | 4.7   |
|                 |              |                      | Homodimer             | 77.4                                                | 63.2  | 50.5  | 3.7                                                             | 3.0   | 2.4   |
| P12999          | BioC         |                      | Monomer               | 114.8                                               | 97.0  | 74.9  | 9.7                                                             | 8.2   | 6.3   |
| P13000          | BioD1        | Cytoplasm            | Monomer               | 122.1                                               | 103.2 | 79.7  | 11.1                                                            | 9.4   | 7.3   |
|                 |              |                      | Homodimer             | 93.1                                                | 76.0  | 60.7  | 5.9                                                             | 4.8   | 3.8   |
| P0A6E9          | BioD2        | Cytoplasm            | Monomer               | 120.5                                               | 101.8 | 78.6  | 10.8                                                            | 9.1   | 7.1   |
|                 |              |                      | Homodimer             | 91.8                                                | 75.0  | 59.9  | 5.7                                                             | 4.7   | 3.7   |
| P12998          | BioF         |                      | Monomer               | 98.7                                                | 83.4  | 64.4  | 6.8                                                             | 5.7   | 4.4   |
|                 |              |                      | Homodimer             | 75.2                                                | 61.4  | 49.1  | 3.4                                                             | 2.8   | 2.2   |
| P13001          | BioH         | Cytoplasm            | Monomer               | 114.4                                               | 96.7  | 74.7  | 9.6                                                             | 8.1   | 6.3   |
| P06709          | BirA         |                      | Monomer               | 105.2                                               | 88.9  | 68.7  | 7.9                                                             | 6.7   | 5.2   |
| P20099          | BisC         |                      | Monomer               | 74.3                                                | 62.7  | 48.5  | 3.3                                                             | 2.8   | 2.2   |
| P0A901          | Blc          | Cell outer membrane  | Monomer               | 131.9                                               | 111.4 | 86.0  | 13.2                                                            | 11.2  | 8.6   |
|                 |              |                      | Complex with SecB     | 73.2                                                | 59.8  | 47.8  | 3.2                                                             | 2.6   | 2.1   |
|                 |              |                      | Complex with TF (Tig) | 81.4                                                | 68.7  | 53.1  | 4.2                                                             | 3.6   | 2.8   |



| UniProtKB A. N. | Protein name | Subcellular location | Subunit               | $D_0 \left( \frac{\mu\text{m}^2}{\text{s}} \right)$ |       |       | $D_{\text{cyto}} \left( \frac{\mu\text{m}^2}{\text{s}} \right)$ |       |       |
|-----------------|--------------|----------------------|-----------------------|-----------------------------------------------------|-------|-------|-----------------------------------------------------------------|-------|-------|
|                 |              |                      |                       | 310 K                                               | 303 K | 293 K | 310 K                                                           | 303 K | 293 K |
| P56976          | Blr          | Cell inner membrane  | Monomer               | 234.8                                               | 198.3 | 153.2 | 42.9                                                            | 36.2  | 28.0  |
|                 |              |                      | Complex with SecB     | 78.9                                                | 64.4  | 51.5  | 3.9                                                             | 3.2   | 2.5   |
|                 |              |                      | Complex with TF (Tig) | 89.9                                                | 75.9  | 58.7  | 5.4                                                             | 4.6   | 3.5   |
| P0ABE2          | BolA         |                      | Monomer               | 160.6                                               | 135.7 | 104.8 | 20.2                                                            | 17.1  | 13.2  |
| P77330          | BorD         | Cell membrane        | Monomer               | 169.6                                               | 143.3 | 110.7 | 22.6                                                            | 19.1  | 14.7  |
|                 |              |                      | Complex with SecB     | 76.5                                                | 62.5  | 49.9  | 3.6                                                             | 2.9   | 2.4   |
|                 |              |                      | Complex with TF (Tig) | 86.2                                                | 72.9  | 56.3  | 4.9                                                             | 4.1   | 3.2   |
| P0AD99          | BrnQ         | Cell inner membrane  | Monomer               | 94.7                                                | 80.0  | 61.8  | 6.1                                                             | 5.2   | 4.0   |
|                 |              |                      | Complex with SecB     | 66.2                                                | 54.0  | 43.2  | 2.5                                                             | 2.0   | 1.6   |
|                 |              |                      | Complex with TF (Tig) | 71.6                                                | 60.5  | 46.7  | 3.0                                                             | 2.6   | 2.0   |
| P39297          | BsmA         | Cell membrane        | Monomer               | 160.4                                               | 135.5 | 104.7 | 20.1                                                            | 17.0  | 13.1  |
|                 |              |                      | Complex with SecB     | 75.9                                                | 62.0  | 49.5  | 3.5                                                             | 2.9   | 2.3   |
|                 |              |                      | Complex with TF (Tig) | 85.3                                                | 72.1  | 55.7  | 4.8                                                             | 4.0   | 3.1   |
| P0AAY1          | BssR         |                      | Monomer               | 149.0                                               | 125.9 | 97.2  | 17.2                                                            | 14.5  | 11.2  |
| P0AB33          | BssS         |                      | Monomer               | 174.8                                               | 147.7 | 114.1 | 24.0                                                            | 20.3  | 15.7  |
| P06129          | BtuB         | Cell outer membrane  | Monomer               | 81.2                                                | 68.6  | 53.0  | 4.2                                                             | 3.5   | 2.7   |
|                 |              |                      | Complex with SecB     | 61.7                                                | 50.4  | 40.3  | 2.0                                                             | 1.7   | 1.3   |
|                 |              |                      | Complex with TF (Tig) | 65.9                                                | 55.6  | 43.0  | 2.4                                                             | 2.0   | 1.6   |
| P06609          | BtuC         | Cell inner membrane  | Monomer               | 105.6                                               | 89.2  | 68.9  | 8.0                                                             | 6.7   | 5.2   |
|                 |              |                      | Complex with SecB     | 68.9                                                | 56.3  | 44.9  | 2.7                                                             | 2.2   | 1.8   |
|                 |              |                      | Complex with TF (Tig) | 75.2                                                | 63.5  | 49.1  | 3.4                                                             | 2.9   | 2.2   |
| P06611          | BtuD         | Cell inner membrane  | Monomer               | 116.7                                               | 98.6  | 76.2  | 10.1                                                            | 8.5   | 6.6   |
|                 |              |                      | Complex with SecB     | 71.0                                                | 58.0  | 46.4  | 3.0                                                             | 2.4   | 1.9   |
|                 |              |                      | Complex with TF (Tig) | 78.2                                                | 66.1  | 51.0  | 3.8                                                             | 3.2   | 2.5   |
| P06610          | BtuE         | Periplasm            | Monomer               | 130.3                                               | 110.1 | 85.0  | 12.9                                                            | 10.9  | 8.4   |
|                 |              |                      | Complex with SecB     | 73.0                                                | 59.7  | 47.7  | 3.2                                                             | 2.6   | 2.1   |
|                 |              |                      | Complex with TF (Tig) | 81.1                                                | 68.5  | 52.9  | 4.2                                                             | 3.5   | 2.7   |
| P37028          | BtuF         | Periplasm            | Monomer               | 113.1                                               | 95.5  | 73.8  | 9.4                                                             | 7.9   | 6.1   |
|                 |              |                      | Complex with SecB     | 70.4                                                | 57.5  | 45.9  | 2.9                                                             | 2.4   | 1.9   |
|                 |              |                      | Complex with TF (Tig) | 77.3                                                | 65.3  | 50.4  | 3.7                                                             | 3.1   | 2.4   |
| P0A9H5          | BtuR         | Cytoplasm            | Monomer               | 126.7                                               | 107.0 | 82.6  | 12.1                                                            | 10.2  | 7.9   |

| UniProtKB A. N. | Protein name | Subcellular location    | Subunit                                                | $D_0 \left( \frac{\mu\text{m}^2}{\text{s}} \right)$ |       |       | $D_{\text{cyto}} \left( \frac{\mu\text{m}^2}{\text{s}} \right)$ |       |       |
|-----------------|--------------|-------------------------|--------------------------------------------------------|-----------------------------------------------------|-------|-------|-----------------------------------------------------------------|-------|-------|
|                 |              |                         |                                                        | 310 K                                               | 303 K | 293 K | 310 K                                                           | 303 K | 293 K |
| P0A9H3          | CadA         | Cytoplasm               | Monomer                                                | 75.9                                                | 64.1  | 49.5  | 3.5                                                             | 3.0   | 2.3   |
|                 |              |                         | Homodimer                                              | 57.8                                                | 47.2  | 37.7  | 1.7                                                             | 1.4   | 1.1   |
|                 |              |                         | Homodecamer                                            | 30.8                                                | 26.0  | 20.1  | 0.2                                                             | 0.2   | 0.2   |
| P0AAE8          | CadB         | Cell inner membrane     | Monomer                                                | 94.3                                                | 79.7  | 61.5  | 6.1                                                             | 5.1   | 4.0   |
|                 |              |                         | Complex with SecB                                      | 66.1                                                | 54.0  | 43.1  | 2.4                                                             | 2.0   | 1.6   |
|                 |              |                         | Complex with TF (Tig)                                  | 71.4                                                | 60.3  | 46.6  | 3.0                                                             | 2.5   | 2.0   |
| P23890          | CadC         | Cell membrane           | Monomer                                                | 86.7                                                | 73.3  | 56.6  | 5.0                                                             | 4.2   | 3.2   |
|                 |              |                         | Complex with SecB                                      | 63.7                                                | 52.1  | 41.6  | 2.2                                                             | 1.8   | 1.4   |
|                 |              |                         | Complex with TF (Tig)                                  | 68.4                                                | 57.8  | 44.6  | 2.7                                                             | 2.3   | 1.7   |
| P60584          | CaiA         |                         | Monomer                                                | 97.8                                                | 82.6  | 63.8  | 6.6                                                             | 5.6   | 4.3   |
|                 |              |                         | Homotetramer                                           | 56.8                                                | 46.4  | 37.1  | 1.6                                                             | 1.3   | 1.0   |
| P31572          | CaiB         | Cytoplasm               | Monomer                                                | 95.6                                                | 80.7  | 62.4  | 6.3                                                             | 5.3   | 4.1   |
|                 |              |                         | Homodimer                                              | 72.8                                                | 59.5  | 47.5  | 3.2                                                             | 2.6   | 2.1   |
| P31552          | CaiC         |                         | Monomer                                                | 86.3                                                | 72.9  | 56.3  | 4.9                                                             | 4.1   | 3.2   |
| P31551          | CaiD         |                         | Monomer                                                | 114.9                                               | 97.1  | 75.0  | 9.7                                                             | 8.2   | 6.3   |
| P39206          | CaiE         |                         | Monomer                                                | 128.4                                               | 108.5 | 83.8  | 12.5                                                            | 10.5  | 8.1   |
| P0AE58          | CaiF         |                         | Monomer                                                | 145.5                                               | 122.9 | 95.0  | 16.4                                                            | 13.8  | 10.7  |
| P31553          | CaiT         | Cell inner membrane     | Monomer                                                | 87.5                                                | 73.9  | 57.1  | 5.1                                                             | 4.3   | 3.3   |
|                 |              |                         | Complex with SecB                                      | 64.0                                                | 52.3  | 41.7  | 2.2                                                             | 1.8   | 1.5   |
|                 |              |                         | Complex with TF (Tig)                                  | 68.7                                                | 58.0  | 44.8  | 2.7                                                             | 2.3   | 1.8   |
| P61517          | Can          |                         | Monomer                                                | 120.3                                               | 101.6 | 78.5  | 10.8                                                            | 9.1   | 7.0   |
|                 |              |                         | Homodimer                                              | 91.7                                                | 74.9  | 59.8  | 5.7                                                             | 4.6   | 3.7   |
| P0A6F1          | CarA         |                         | Monomer                                                | 98.8                                                | 83.5  | 64.5  | 6.8                                                             | 5.8   | 4.4   |
|                 |              |                         | Heterotetramer (CarA <sub>2</sub> -CarB <sub>2</sub> ) | 44.4                                                | 37.5  | 29.0  | 0.8                                                             | 0.7   | 0.5   |
| P00968          | CarB         |                         | Monomer                                                | 65.6                                                | 55.4  | 42.8  | 2.4                                                             | 2.0   | 1.6   |
|                 |              |                         | Heterotetramer (CarA <sub>2</sub> -CarB <sub>2</sub> ) | 44.4                                                | 37.5  | 29.0  | 0.8                                                             | 0.7   | 0.5   |
| Q47083          | Cbl          |                         | Monomer                                                | 104.6                                               | 88.4  | 68.2  | 7.8                                                             | 6.6   | 5.1   |
| P36659          | CbpA         | Cytoplasm ><br>nucleoid | Monomer                                                | 106.2                                               | 89.7  | 69.3  | 8.1                                                             | 6.8   | 5.3   |
| P63264          | CbpM         |                         | Monomer                                                | 163.3                                               | 137.9 | 106.5 | 20.9                                                            | 17.6  | 13.6  |
| P31456          | CbrA         |                         | Monomer                                                | 100.1                                               | 84.5  | 65.3  | 7.0                                                             | 5.9   | 4.6   |

| UniProtKB A. N. | Protein name | Subcellular location | Subunit               | $D_0 \left( \frac{\mu\text{m}^2}{\text{s}} \right)$ |       |       | $D_{\text{cyto}} \left( \frac{\mu\text{m}^2}{\text{s}} \right)$ |       |       |
|-----------------|--------------|----------------------|-----------------------|-----------------------------------------------------|-------|-------|-----------------------------------------------------------------|-------|-------|
|                 |              |                      |                       | 310 K                                               | 303 K | 293 K | 310 K                                                           | 303 K | 293 K |
| P31468          | CbrB         | Cell inner membrane  | Monomer               | 141.2                                               | 119.3 | 92.1  | 15.3                                                            | 13.0  | 10.0  |
|                 |              |                      | Complex with SecB     | 74.3                                                | 60.7  | 48.5  | 3.3                                                             | 2.7   | 2.2   |
|                 |              |                      | Complex with TF (Tig) | 82.9                                                | 70.0  | 54.1  | 4.4                                                             | 3.7   | 2.9   |
| P31469          | CbrC         |                      | Monomer               | 125.6                                               | 106.1 | 81.9  | 11.9                                                            | 10.0  | 7.7   |
| P64524          | CbtA         |                      | Monomer               | 151.6                                               | 128.1 | 98.9  | 17.9                                                            | 15.1  | 11.7  |
| P06961          | Cca          |                      | Monomer               | 94.5                                                | 79.8  | 61.6  | 6.1                                                             | 5.2   | 4.0   |
|                 |              |                      | Homodimer             | 72.0                                                | 58.8  | 47.0  | 3.1                                                             | 2.5   | 2.0   |
| P33931          | CcmA         | Cell inner membrane  | Monomer               | 124.3                                               | 105.1 | 81.1  | 11.6                                                            | 9.8   | 7.6   |
|                 |              |                      | Complex with SecB     | 72.2                                                | 59.0  | 47.1  | 3.1                                                             | 2.5   | 2.0   |
|                 |              |                      | Complex with TF (Tig) | 79.9                                                | 67.5  | 52.1  | 4.0                                                             | 3.4   | 2.6   |
| P0ABL8          | CcmB         | Cell inner membrane  | Monomer               | 123.2                                               | 104.1 | 80.4  | 11.4                                                            | 9.6   | 7.4   |
|                 |              |                      | Complex with SecB     | 72.1                                                | 58.9  | 47.0  | 3.1                                                             | 2.5   | 2.0   |
|                 |              |                      | Complex with TF (Tig) | 79.7                                                | 67.3  | 52.0  | 4.0                                                             | 3.4   | 2.6   |
| P0ABM1          | CcmC         | Cell inner membrane  | Monomer               | 115.4                                               | 97.5  | 75.3  | 9.8                                                             | 8.3   | 6.4   |
|                 |              |                      | Complex with SecB     | 70.8                                                | 57.8  | 46.2  | 2.9                                                             | 2.4   | 1.9   |
|                 |              |                      | Complex with TF (Tig) | 77.9                                                | 65.8  | 50.8  | 3.8                                                             | 3.2   | 2.5   |
| P0ABM5          | CcmD         | Cell inner membrane  | Monomer               | 190.7                                               | 161.1 | 124.4 | 28.6                                                            | 24.2  | 18.7  |
|                 |              |                      | Complex with SecB     | 77.6                                                | 63.4  | 50.6  | 3.7                                                             | 3.0   | 2.4   |
|                 |              |                      | Complex with TF (Tig) | 87.8                                                | 74.2  | 57.3  | 5.1                                                             | 4.3   | 3.3   |
| P69490          | CcmE         | Cell inner membrane  | Monomer               | 137.9                                               | 116.5 | 90.0  | 14.6                                                            | 12.3  | 9.5   |
|                 |              |                      | Complex with SecB     | 73.9                                                | 60.4  | 48.3  | 3.3                                                             | 2.7   | 2.2   |
|                 |              |                      | Complex with TF (Tig) | 82.4                                                | 69.6  | 53.8  | 4.4                                                             | 3.7   | 2.8   |
| P33927          | CcmF         | Cell inner membrane  | Monomer               | 79.8                                                | 67.4  | 52.1  | 4.0                                                             | 3.4   | 2.6   |
|                 |              |                      | Complex with SecB     | 61.2                                                | 50.0  | 40.0  | 2.0                                                             | 1.6   | 1.3   |
|                 |              |                      | Complex with TF (Tig) | 65.2                                                | 55.1  | 42.6  | 2.4                                                             | 2.0   | 1.5   |
| P0ABM9          | CcmH         | Cell inner membrane  | Monomer               | 101.1                                               | 85.4  | 66.0  | 7.2                                                             | 6.1   | 4.7   |
|                 |              |                      | Complex with SecB     | 67.8                                                | 55.4  | 44.3  | 2.6                                                             | 2.1   | 1.7   |
|                 |              |                      | Complex with TF (Tig) | 73.8                                                | 62.3  | 48.2  | 3.3                                                             | 2.8   | 2.1   |
| P37047          | CdaR         |                      | Monomer               | 96.8                                                | 81.8  | 63.2  | 6.5                                                             | 5.5   | 4.2   |
| P0ABF6          | Cdd          |                      | Monomer               | 110.0                                               | 92.9  | 71.8  | 8.8                                                             | 7.4   | 5.7   |
|                 |              |                      | Homodimer             | 83.8                                                | 68.5  | 54.7  | 4.5                                                             | 3.7   | 3.0   |

| UniProtKB A. N. | Protein name | Subcellular location | Subunit               | $D_0 \left( \frac{\mu\text{m}^2}{\text{s}} \right)$ |       |       | $D_{\text{cyto}} \left( \frac{\mu\text{m}^2}{\text{s}} \right)$ |       |       |
|-----------------|--------------|----------------------|-----------------------|-----------------------------------------------------|-------|-------|-----------------------------------------------------------------|-------|-------|
|                 |              |                      |                       | 310 K                                               | 303 K | 293 K | 310 K                                                           | 303 K | 293 K |
| P06282          | Cdh          | Cell inner membrane  | Monomer               | 114.5                                               | 96.7  | 74.7  | 9.6                                                             | 8.1   | 6.3   |
|                 |              |                      | Complex with SecB     | 70.6                                                | 57.7  | 46.1  | 2.9                                                             | 2.4   | 1.9   |
|                 |              |                      | Complex with TF (Tig) | 77.6                                                | 65.6  | 50.7  | 3.7                                                             | 3.2   | 2.4   |
| P0ABG1          | CdsA         | Cell inner membrane  | Monomer               | 110.1                                               | 93.0  | 71.8  | 8.8                                                             | 7.4   | 5.7   |
|                 |              |                      | Complex with SecB     | 69.8                                                | 57.0  | 45.6  | 2.8                                                             | 2.3   | 1.8   |
|                 |              |                      | Complex with TF (Tig) | 76.5                                                | 64.6  | 49.9  | 3.6                                                             | 3.0   | 2.3   |
| P0AE60          | CedA         |                      | Monomer               | 176.9                                               | 149.5 | 115.5 | 24.6                                                            | 20.8  | 16.1  |
| P0A9H7          | Cfa          | Cytoplasm            | Monomer               | 96.6                                                | 81.6  | 63.0  | 6.4                                                             | 5.4   | 4.2   |
| P31801          | ChaA         | Cell inner membrane  | Monomer               | 101.0                                               | 85.3  | 65.9  | 7.2                                                             | 6.1   | 4.7   |
|                 |              |                      | Complex with SecB     | 67.8                                                | 55.4  | 44.2  | 2.6                                                             | 2.1   | 1.7   |
|                 |              |                      | Complex with TF (Tig) | 73.8                                                | 62.3  | 48.1  | 3.3                                                             | 2.8   | 2.1   |
| P0AE63          | ChaB         |                      | Monomer               | 180.2                                               | 152.3 | 117.6 | 25.6                                                            | 21.6  | 16.7  |
| P39163          | ChaC         |                      | Monomer               | 119.5                                               | 101.0 | 78.0  | 10.6                                                            | 9.0   | 6.9   |
| P69791          | ChbA         | Cytoplasm            | Monomer               | 156.9                                               | 132.5 | 102.4 | 19.2                                                            | 16.2  | 12.5  |
|                 |              |                      | Homodimer             | 119.5                                               | 97.7  | 78.0  | 10.6                                                            | 8.7   | 6.9   |
| P69795          | ChbB         | Cytoplasm            | Monomer               | 163.7                                               | 138.3 | 106.8 | 21.0                                                            | 17.7  | 13.7  |
| P17334          | ChbC         | Cell inner membrane  | Monomer               | 93.0                                                | 78.6  | 60.7  | 5.9                                                             | 5.0   | 3.8   |
|                 |              |                      | Complex with SecB     | 65.7                                                | 53.7  | 42.9  | 2.4                                                             | 2.0   | 1.6   |
|                 |              |                      | Complex with TF (Tig) | 70.9                                                | 59.9  | 46.3  | 3.0                                                             | 2.5   | 1.9   |
| P17411          | ChbF         |                      | Monomer               | 91.4                                                | 77.2  | 59.7  | 5.6                                                             | 4.8   | 3.7   |
|                 |              |                      | Homotetramer          | 53.1                                                | 43.4  | 34.7  | 1.3                                                             | 1.1   | 0.9   |
| P37794          | ChbG         |                      | Monomer               | 115.6                                               | 97.7  | 75.4  | 9.8                                                             | 8.3   | 6.4   |
| P17410          | ChbR         |                      | Monomer               | 108.1                                               | 91.3  | 70.5  | 8.4                                                             | 7.1   | 5.5   |
|                 |              |                      | Homodimer             | 82.4                                                | 67.3  | 53.7  | 4.4                                                             | 3.6   | 2.8   |
| P07363          | CheA         | Cytoplasm            | Monomer               | 79.8                                                | 67.5  | 52.1  | 4.0                                                             | 3.4   | 2.6   |
| P07330          | CheB         | Cytoplasm            | Monomer               | 102.8                                               | 86.8  | 67.1  | 7.5                                                             | 6.3   | 4.9   |
| P07364          | CheR         |                      | Monomer               | 108.2                                               | 91.4  | 70.6  | 8.4                                                             | 7.1   | 5.5   |
| P0A964          | CheW         | Cytoplasm            | Monomer               | 136.8                                               | 115.5 | 89.2  | 14.3                                                            | 12.1  | 9.3   |
| P0AE67          | CheY         | Cytoplasm            | Monomer               | 150.8                                               | 127.4 | 98.4  | 17.7                                                            | 14.9  | 11.5  |
| P0A9H9          | CheZ         | Cytoplasm            | Monomer               | 122.5                                               | 103.4 | 79.9  | 11.2                                                            | 9.5   | 7.3   |
|                 |              |                      | Homodimer             | 93.3                                                | 76.2  | 60.9  | 5.9                                                             | 4.8   | 3.9   |

| UniProtKB A. N. | Protein name | Subcellular location | Subunit                 | $D_0 \left( \frac{\mu\text{m}^2}{\text{s}} \right)$ |       |       | $D_{\text{cyto}} \left( \frac{\mu\text{m}^2}{\text{s}} \right)$ |       |       |
|-----------------|--------------|----------------------|-------------------------|-----------------------------------------------------|-------|-------|-----------------------------------------------------------------|-------|-------|
|                 |              |                      |                         | 310 K                                               | 303 K | 293 K | 310 K                                                           | 303 K | 293 K |
| P13656          | ChiA         | Periplasm            | Monomer                 | 70.8                                                | 59.8  | 46.2  | 2.9                                                             | 2.5   | 1.9   |
|                 |              |                      | Complex with SecB       | 57.3                                                | 46.8  | 37.4  | 1.6                                                             | 1.3   | 1.1   |
|                 |              |                      | Complex with TF (Tig)   | 60.4                                                | 51.1  | 39.4  | 1.9                                                             | 1.6   | 1.2   |
| P76213          | Cho          |                      | Monomer                 | 107.1                                               | 90.5  | 69.9  | 8.2                                                             | 7.0   | 5.4   |
| P33647          | ChpB         |                      | Monomer                 | 158.1                                               | 133.6 | 103.2 | 19.5                                                            | 16.5  | 12.7  |
|                 |              |                      | Homodimer               | 120.5                                               | 98.4  | 78.6  | 10.8                                                            | 8.8   | 7.1   |
| P08365          | ChpS         |                      | Monomer                 | 177.7                                               | 150.1 | 116.0 | 24.8                                                            | 21.0  | 16.2  |
| P17315          | CirA         | Cell outer membrane  | Monomer                 | 78.8                                                | 66.5  | 51.4  | 3.9                                                             | 3.3   | 2.5   |
|                 |              |                      | Complex with SecB       | 60.8                                                | 49.7  | 39.7  | 1.9                                                             | 1.6   | 1.3   |
|                 |              |                      | Complex with TF (Tig)   | 64.7                                                | 54.7  | 42.2  | 2.3                                                             | 1.9   | 1.5   |
| P77390          | CitC         |                      | Monomer                 | 100.1                                               | 84.6  | 65.3  | 7.0                                                             | 5.9   | 4.6   |
| P69330          | CitD         | Cytoplasm            | Monomer                 | 168.1                                               | 142.0 | 109.7 | 22.2                                                            | 18.7  | 14.5  |
| P0A9I1          | CitE         | Cytoplasm            | Monomer                 | 107.9                                               | 91.2  | 70.4  | 8.4                                                             | 7.1   | 5.5   |
| P75726          | CitF         | Cytoplasm            | Monomer                 | 88.3                                                | 74.6  | 57.6  | 5.2                                                             | 4.4   | 3.4   |
| P77231          | CitG         |                      | Monomer                 | 109.8                                               | 92.8  | 71.7  | 8.7                                                             | 7.4   | 5.7   |
| P0AE74          | CitT         | Cell inner membrane  | Monomer                 | 89.7                                                | 75.7  | 58.5  | 5.4                                                             | 4.5   | 3.5   |
|                 |              |                      | Complex with SecB       | 64.7                                                | 52.8  | 42.2  | 2.3                                                             | 1.9   | 1.5   |
|                 |              |                      | Complex with TF (Tig)   | 69.6                                                | 58.8  | 45.4  | 2.8                                                             | 2.4   | 1.8   |
| P0A6G5          | CitX         |                      | Monomer                 | 130.8                                               | 110.5 | 85.3  | 13.0                                                            | 11.0  | 8.5   |
| P37019          | ClcA         | Cell inner membrane  | Monomer                 | 91.5                                                | 77.3  | 59.7  | 5.7                                                             | 4.8   | 3.7   |
|                 |              |                      | Complex with SecB       | 65.2                                                | 53.3  | 42.6  | 2.4                                                             | 1.9   | 1.5   |
|                 |              |                      | Complex with TF (Tig)   | 70.4                                                | 59.4  | 45.9  | 2.9                                                             | 2.4   | 1.9   |
| P76175          | ClcB         | Cell inner membrane  | Monomer                 | 96.4                                                | 81.4  | 62.9  | 6.4                                                             | 5.4   | 4.2   |
|                 |              |                      | Complex with SecB       | 66.6                                                | 54.4  | 43.5  | 2.5                                                             | 2.0   | 1.6   |
|                 |              |                      | Complex with TF (Tig)   | 72.2                                                | 61.0  | 47.1  | 3.1                                                             | 2.6   | 2.0   |
| P0ABH9          | ClpA         |                      | Monomer                 | 74.8                                                | 63.2  | 48.8  | 3.4                                                             | 2.9   | 2.2   |
| P63284          | ClpB         | Cytoplasm            | Monomer                 | 71.2                                                | 60.2  | 46.5  | 3.0                                                             | 2.5   | 1.9   |
|                 |              |                      | Homoheptamer            | 35.3                                                | 28.8  | 23.0  | 0.4                                                             | 0.3   | 0.2   |
| P0A6G7          | ClpP         | Cytoplasm            | Monomer                 | 124.1                                               | 104.8 | 81.0  | 11.5                                                            | 9.8   | 7.5   |
|                 |              |                      | Heterodimer (ClpP–ClpX) | 80.7                                                | 68.1  | 52.6  | 4.1                                                             | 3.5   | 2.7   |
| P0A8Q6          | ClpS         |                      | Monomer                 | 159.7                                               | 134.9 | 104.2 | 19.9                                                            | 16.8  | 13.0  |

| UniProtKB A. N. | Protein name | Subcellular location | Subunit                 | $D_0 \left( \frac{\mu\text{m}^2}{\text{s}} \right)$ |       |       | $D_{\text{cyto}} \left( \frac{\mu\text{m}^2}{\text{s}} \right)$ |       |       |
|-----------------|--------------|----------------------|-------------------------|-----------------------------------------------------|-------|-------|-----------------------------------------------------------------|-------|-------|
|                 |              |                      |                         | 310 K                                               | 303 K | 293 K | 310 K                                                           | 303 K | 293 K |
| P0A6H1          | ClpX         |                      | Monomer                 | 94.6                                                | 79.9  | 61.7  | 6.1                                                             | 5.2   | 4.0   |
|                 |              |                      | Heterodimer (ClpP–ClpX) | 80.7                                                | 68.1  | 52.6  | 4.1                                                             | 3.5   | 2.7   |
| P0A6H8          | Cls          | Cell inner membrane  | Monomer                 | 88.5                                                | 74.8  | 57.8  | 5.2                                                             | 4.4   | 3.4   |
|                 |              |                      | Complex with SecB       | 64.3                                                | 52.5  | 42.0  | 2.3                                                             | 1.9   | 1.5   |
|                 |              |                      | Complex with TF (Tig)   | 69.1                                                | 58.4  | 45.1  | 2.8                                                             | 2.3   | 1.8   |
| P0A6I0          | Cmk          | Cytoplasm            | Monomer                 | 120.9                                               | 102.2 | 78.9  | 10.9                                                            | 9.2   | 7.1   |
| P76290          | CmoA         |                      | Monomer                 | 115.6                                               | 97.6  | 75.4  | 9.8                                                             | 8.3   | 6.4   |
| P76291          | CmoB         |                      | Monomer                 | 103.3                                               | 87.3  | 67.4  | 7.6                                                             | 6.4   | 4.9   |
| P69826          | CmtA         | Cell inner membrane  | Monomer                 | 92.6                                                | 78.2  | 60.4  | 5.8                                                             | 4.9   | 3.8   |
|                 |              |                      | Complex with SecB       | 65.5                                                | 53.5  | 42.8  | 2.4                                                             | 2.0   | 1.6   |
|                 |              |                      | Complex with TF (Tig)   | 70.8                                                | 59.8  | 46.2  | 2.9                                                             | 2.5   | 1.9   |
| P69824          | CmtB         | Cytoplasm            | Monomer                 | 143.3                                               | 121.1 | 93.5  | 15.8                                                            | 13.4  | 10.3  |
| P64467          | Cnu          |                      | Monomer                 | 184.6                                               | 155.9 | 120.4 | 26.8                                                            | 22.7  | 17.5  |
| P0A6I3          | CoaA         | Cytoplasm            | Monomer                 | 104.0                                               | 87.9  | 67.9  | 7.7                                                             | 6.5   | 5.0   |
| P0ABQ0          | CoaBC        |                      | Monomer                 | 97.0                                                | 82.0  | 63.3  | 6.5                                                             | 5.5   | 4.3   |
|                 |              |                      | Homododecamer           | 36.6                                                | 29.9  | 23.9  | 0.4                                                             | 0.3   | 0.3   |
| P0A6I6          | CoaD         | Cytoplasm            | Monomer                 | 137.5                                               | 116.2 | 89.7  | 14.5                                                            | 12.2  | 9.5   |
|                 |              |                      | Homoheptamer            | 68.1                                                | 55.7  | 44.5  | 2.7                                                             | 2.2   | 1.7   |
| P0A6I9          | CoaE         | Cytoplasm            | Monomer                 | 125.3                                               | 105.8 | 81.7  | 11.8                                                            | 10.0  | 7.7   |
| P75960          | CobB         | Cytoplasm            | Monomer                 | 117.4                                               | 99.2  | 76.6  | 10.2                                                            | 8.6   | 6.6   |
| P52086          | CobC         |                      | Monomer                 | 123.8                                               | 104.6 | 80.8  | 11.5                                                            | 9.7   | 7.5   |
| P36561          | CobS         | Cell inner membrane  | Monomer                 | 117.9                                               | 99.6  | 77.0  | 10.3                                                            | 8.7   | 6.7   |
|                 |              |                      | Complex with SecB       | 71.2                                                | 58.2  | 46.5  | 3.0                                                             | 2.4   | 1.9   |
| P36562          | CobT         |                      | Complex with TF (Tig)   | 78.5                                                | 66.3  | 51.2  | 3.8                                                             | 3.2   | 2.5   |
|                 |              |                      | Monomer                 | 103.3                                               | 87.3  | 67.4  | 7.6                                                             | 6.4   | 4.9   |
| P0AE76          | CobU         |                      | Homodimer               | 78.7                                                | 64.3  | 51.4  | 3.9                                                             | 3.2   | 2.5   |
|                 |              |                      | Monomer                 | 131.1                                               | 110.7 | 85.5  | 13.0                                                            | 11.0  | 8.5   |
| P25524          | CodA         |                      | Homodimer               | 99.9                                                | 81.6  | 65.2  | 7.0                                                             | 5.7   | 4.6   |
|                 |              |                      | Monomer                 | 93.6                                                | 79.1  | 61.1  | 6.0                                                             | 5.0   | 3.9   |
| P0AA82          | CodB         | Cell inner membrane  | Homotetramer            | 54.4                                                | 44.4  | 35.5  | 1.4                                                             | 1.2   | 0.9   |
|                 |              |                      | Monomer                 | 96.8                                                | 81.8  | 63.2  | 6.5                                                             | 5.5   | 4.2   |

| UniProtKB A. N. | Protein name | Subcellular location | Subunit               | $D_0 \left( \frac{\mu\text{m}^2}{\text{s}} \right)$ |       |       | $D_{\text{cyto}} \left( \frac{\mu\text{m}^2}{\text{s}} \right)$ |       |       |
|-----------------|--------------|----------------------|-----------------------|-----------------------------------------------------|-------|-------|-----------------------------------------------------------------|-------|-------|
|                 |              |                      |                       | 310 K                                               | 303 K | 293 K | 310 K                                                           | 303 K | 293 K |
|                 |              |                      | Complex with SecB     | 66.7                                                | 54.5  | 43.6  | 2.5                                                             | 2.1   | 1.6   |
|                 |              |                      | Complex with TF (Tig) | 72.3                                                | 61.1  | 47.2  | 3.1                                                             | 2.6   | 2.0   |
| P46891          | Cof          |                      | Monomer               | 111.6                                               | 94.3  | 72.8  | 9.1                                                             | 7.7   | 5.9   |
| P75974          | CohE         |                      | Monomer               | 120.3                                               | 101.6 | 78.5  | 10.8                                                            | 9.1   | 7.0   |
|                 |              |                      | Monomer               | 73.6                                                | 62.2  | 48.0  | 3.3                                                             | 2.8   | 2.1   |
| Q59385          | CopA         | Cell membrane        | Complex with SecB     | 58.6                                                | 47.9  | 38.3  | 1.8                                                             | 1.4   | 1.1   |
|                 |              |                      | Complex with TF (Tig) | 62.0                                                | 52.4  | 40.5  | 2.1                                                             | 1.7   | 1.3   |
|                 |              |                      | Monomer               | 103.8                                               | 87.7  | 67.7  | 7.6                                                             | 6.5   | 5.0   |
| P0ABI4          | CorA         | Cell inner membrane  | Complex with SecB     | 68.5                                                | 55.9  | 44.7  | 2.7                                                             | 2.2   | 1.8   |
|                 |              |                      | Complex with TF (Tig) | 74.6                                                | 63.1  | 48.7  | 3.4                                                             | 2.9   | 2.2   |
| P0AE78          | CorC         |                      | Monomer               | 107.7                                               | 91.0  | 70.3  | 8.3                                                             | 7.0   | 5.4   |
|                 |              |                      | Monomer               | 80.1                                                | 67.7  | 52.3  | 4.1                                                             | 3.4   | 2.6   |
| P08331          | CpdB         | Periplasm            | Complex with SecB     | 61.3                                                | 50.1  | 40.0  | 2.0                                                             | 1.6   | 1.3   |
|                 |              |                      | Complex with TF (Tig) | 65.3                                                | 55.2  | 42.6  | 2.4                                                             | 2.0   | 1.5   |
|                 |              |                      | Monomer               | 82.0                                                | 69.3  | 53.5  | 4.3                                                             | 3.6   | 2.8   |
| P0CB39          | CptA         | Cell inner membrane  | Complex with SecB     | 62.1                                                | 50.7  | 40.5  | 2.1                                                             | 1.7   | 1.3   |
|                 |              |                      | Complex with TF (Tig) | 66.3                                                | 56.0  | 43.2  | 2.5                                                             | 2.1   | 1.6   |
|                 |              |                      | Monomer               | 90.7                                                | 76.6  | 59.2  | 5.5                                                             | 4.7   | 3.6   |
| P0AE82          | CpxA         | Cell inner membrane  | Complex with SecB     | 65.0                                                | 53.1  | 42.4  | 2.3                                                             | 1.9   | 1.5   |
|                 |              |                      | Complex with TF (Tig) | 70.0                                                | 59.1  | 45.7  | 2.9                                                             | 2.4   | 1.9   |
|                 |              |                      | Monomer               | 134.2                                               | 113.4 | 87.6  | 13.7                                                            | 11.6  | 9.0   |
| P0AE85          | CpxP         | Periplasm            | Complex with SecB     | 73.5                                                | 60.1  | 48.0  | 3.2                                                             | 2.7   | 2.1   |
|                 |              |                      | Complex with TF (Tig) | 81.8                                                | 69.1  | 53.4  | 4.3                                                             | 3.6   | 2.8   |
| P0AE88          | CpxR         | Cytoplasm            | Monomer               | 118.1                                               | 99.7  | 77.0  | 10.3                                                            | 8.7   | 6.7   |
| P37001          | CrcA         |                      | Monomer               | 127.2                                               | 107.4 | 83.0  | 12.2                                                            | 10.3  | 8.0   |
|                 |              |                      | Monomer               | 152.2                                               | 128.5 | 99.3  | 18.0                                                            | 15.2  | 11.7  |
| P37002          | CrcB         | Cell inner membrane  | Complex with SecB     | 75.3                                                | 61.5  | 49.1  | 3.5                                                             | 2.8   | 2.3   |
|                 |              |                      | Complex with TF (Tig) | 84.4                                                | 71.3  | 55.1  | 4.6                                                             | 3.9   | 3.0   |
| P0AE91          | CreA         |                      | Monomer               | 139.8                                               | 118.1 | 91.2  | 15.0                                                            | 12.7  | 9.8   |
| P08368          | CreB         | Cytoplasm            | Monomer               | 118.4                                               | 100.0 | 77.3  | 10.4                                                            | 8.8   | 6.8   |
|                 |              |                      | Monomer               | 90.3                                                | 76.3  | 58.9  | 5.5                                                             | 4.6   | 3.6   |
| P08401          | CreC         | Cell inner membrane  |                       |                                                     |       |       |                                                                 |       |       |

| UniProtKB A. N. | Protein name | Subcellular location | Subunit                | $D_0 \left( \frac{\mu\text{m}^2}{\text{s}} \right)$ |       |       | $D_{\text{cyto}} \left( \frac{\mu\text{m}^2}{\text{s}} \right)$ |       |       |
|-----------------|--------------|----------------------|------------------------|-----------------------------------------------------|-------|-------|-----------------------------------------------------------------|-------|-------|
|                 |              |                      |                        | 310 K                                               | 303 K | 293 K | 310 K                                                           | 303 K | 293 K |
|                 |              |                      | Complex with SecB      | 64.9                                                | 53.0  | 42.3  | 2.3                                                             | 1.9   | 1.5   |
|                 |              |                      | Complex with TF (Tig)  | 69.9                                                | 59.0  | 45.6  | 2.8                                                             | 2.4   | 1.9   |
| P08369          | CreD         | Cell inner membrane  | Monomer                | 91.9                                                | 77.7  | 60.0  | 5.7                                                             | 4.8   | 3.7   |
|                 |              |                      | Complex with SecB      | 65.4                                                | 53.4  | 42.7  | 2.4                                                             | 1.9   | 1.5   |
|                 |              |                      | Complex with TF (Tig)  | 70.5                                                | 59.6  | 46.0  | 2.9                                                             | 2.5   | 1.9   |
| P24251          | Crl          | Cytoplasm            | Monomer                | 144.7                                               | 122.3 | 94.4  | 16.2                                                            | 13.7  | 10.6  |
| P75975          | CroE         |                      | Monomer                | 194.1                                               | 164.0 | 126.7 | 29.7                                                            | 25.1  | 19.4  |
| P0ACJ8          | Crp          |                      | Monomer                | 123.1                                               | 104.0 | 80.3  | 11.3                                                            | 9.6   | 7.4   |
| P69783          | Crr          | Cytoplasm            | Monomer                | 136.3                                               | 115.1 | 88.9  | 14.2                                                            | 12.0  | 9.3   |
|                 |              |                      | Heterodimer (Crr–GlpK) | 78.5                                                | 66.3  | 51.2  | 3.9                                                             | 3.3   | 2.5   |
| Q46925          | CsdA         |                      | Monomer                | 97.2                                                | 82.1  | 63.4  | 6.5                                                             | 5.5   | 4.3   |
|                 |              |                      | Homodimer              | 74.1                                                | 60.5  | 48.3  | 3.3                                                             | 2.7   | 2.2   |
| P28307          | CsgA         | Fimbrium             | Monomer                | 147.0                                               | 124.2 | 95.9  | 16.7                                                            | 14.1  | 10.9  |
|                 |              |                      | Complex with SecB      | 74.9                                                | 61.1  | 48.8  | 3.4                                                             | 2.8   | 2.2   |
|                 |              |                      | Complex with TF (Tig)  | 83.7                                                | 70.7  | 54.6  | 4.5                                                             | 3.8   | 3.0   |
| P0ABK7          | CsgB         | Fimbrium             | Monomer                | 143.9                                               | 121.6 | 93.9  | 16.0                                                            | 13.5  | 10.4  |
|                 |              |                      | Complex with SecB      | 74.6                                                | 60.9  | 48.7  | 3.4                                                             | 2.8   | 2.2   |
|                 |              |                      | Complex with TF (Tig)  | 83.3                                                | 70.4  | 54.4  | 4.5                                                             | 3.8   | 2.9   |
| P52107          | CsgC         | Periplasm            | Monomer                | 160.8                                               | 135.8 | 104.9 | 20.2                                                            | 17.1  | 13.2  |
|                 |              |                      | Complex with SecB      | 76.0                                                | 62.0  | 49.6  | 3.5                                                             | 2.9   | 2.3   |
|                 |              |                      | Complex with TF (Tig)  | 85.4                                                | 72.1  | 55.7  | 4.8                                                             | 4.0   | 3.1   |
| P52106          | CsgD         | Cell inner membrane  | Monomer                | 120.6                                               | 101.9 | 78.7  | 10.8                                                            | 9.1   | 7.1   |
|                 |              |                      | Complex with SecB      | 71.7                                                | 58.5  | 46.8  | 3.0                                                             | 2.5   | 2.0   |
|                 |              |                      | Complex with TF (Tig)  | 79.1                                                | 66.8  | 51.6  | 3.9                                                             | 3.3   | 2.6   |
| P0AE95          | CsgE         |                      | Monomer                | 147.6                                               | 124.7 | 96.3  | 16.9                                                            | 14.3  | 11.0  |
| P0AE98          | CsgF         |                      | Monomer                | 147.0                                               | 124.1 | 95.9  | 16.7                                                            | 14.1  | 10.9  |
| P0AEA2          | CsgG         | Cell membrane        | Monomer                | 111.3                                               | 94.1  | 72.7  | 9.0                                                             | 7.6   | 5.9   |
|                 |              |                      | Complex with SecB      | 70.0                                                | 57.2  | 45.7  | 2.9                                                             | 2.3   | 1.9   |
|                 |              |                      | Complex with TF (Tig)  | 76.8                                                | 64.9  | 50.1  | 3.6                                                             | 3.1   | 2.4   |
| P76621          | CsiD         |                      | Monomer                | 102.9                                               | 86.9  | 67.2  | 7.5                                                             | 6.3   | 4.9   |
|                 |              |                      | Homotetramer           | 59.8                                                | 48.8  | 39.0  | 1.9                                                             | 1.5   | 1.2   |



| UniProtKB A. N. | Protein name | Subcellular location | Subunit               | $D_0 \left( \frac{\mu\text{m}^2}{\text{s}} \right)$ |       |       | $D_{\text{cyto}} \left( \frac{\mu\text{m}^2}{\text{s}} \right)$ |       |       |
|-----------------|--------------|----------------------|-----------------------|-----------------------------------------------------|-------|-------|-----------------------------------------------------------------|-------|-------|
|                 |              |                      |                       | 310 K                                               | 303 K | 293 K | 310 K                                                           | 303 K | 293 K |
| P54901          | CsiE         |                      | Monomer               | 92.5                                                | 78.1  | 60.4  | 5.8                                                             | 4.9   | 3.8   |
| P37338          | CsiR         | Cytoplasm            | Monomer               | 120.5                                               | 101.8 | 78.6  | 10.8                                                            | 9.1   | 7.0   |
| P0A9X9          | CspA         | Cytoplasm            | Monomer               | 194.1                                               | 164.0 | 126.7 | 29.7                                                            | 25.1  | 19.4  |
| P36995          | CspB         | Cytoplasm            | Monomer               | 191.0                                               | 161.3 | 124.6 | 28.7                                                            | 24.3  | 18.7  |
| P0A9Y6          | CspC         | Cytoplasm            | Monomer               | 194.1                                               | 164.0 | 126.7 | 29.7                                                            | 25.1  | 19.4  |
| P0A968          | CspD         | Cytoplasm            | Monomer               | 188.6                                               | 159.3 | 123.1 | 28.0                                                            | 23.7  | 18.3  |
|                 |              |                      | Homodimer             | 143.7                                               | 117.4 | 93.8  | 15.9                                                            | 13.0  | 10.4  |
| P0A972          | CspE         | Cytoplasm            | Monomer               | 193.5                                               | 163.5 | 126.3 | 29.5                                                            | 24.9  | 19.2  |
| P0A976          | CspF         | Cytoplasm            | Monomer               | 192.5                                               | 162.6 | 125.6 | 29.2                                                            | 24.6  | 19.0  |
| P0A978          | CspG         | Cytoplasm            | Monomer               | 190.3                                               | 160.8 | 124.2 | 28.5                                                            | 24.1  | 18.6  |
| P0A982          | CspH         | Cytoplasm            | Monomer               | 190.9                                               | 161.3 | 124.6 | 28.7                                                            | 24.2  | 18.7  |
| P0A986          | CspI         | Cytoplasm            | Monomer               | 191.3                                               | 161.6 | 124.8 | 28.8                                                            | 24.3  | 18.8  |
| P69913          | CsrA         |                      | Monomer               | 200.0                                               | 169.0 | 130.5 | 31.5                                                            | 26.6  | 20.5  |
|                 |              |                      | Homodimer             | 152.4                                               | 124.5 | 99.5  | 18.1                                                            | 14.8  | 11.8  |
| P13518          | CsrD         | Cell membrane        | Monomer               | 79.0                                                | 66.7  | 51.6  | 3.9                                                             | 3.3   | 2.6   |
|                 |              |                      | Complex with SecB     | 60.9                                                | 49.7  | 39.7  | 2.0                                                             | 1.6   | 1.3   |
|                 |              |                      | Complex with TF (Tig) | 64.8                                                | 54.8  | 42.3  | 2.3                                                             | 2.0   | 1.5   |
| P15078          | CstA         | Cell inner membrane  | Monomer               | 78.3                                                | 66.1  | 51.1  | 3.8                                                             | 3.2   | 2.5   |
|                 |              |                      | Complex with SecB     | 60.6                                                | 49.5  | 39.5  | 1.9                                                             | 1.6   | 1.3   |
|                 |              |                      | Complex with TF (Tig) | 64.4                                                | 54.4  | 42.1  | 2.3                                                             | 1.9   | 1.5   |
| P36649          | CueO         | Periplasm            | Monomer               | 87.5                                                | 73.9  | 57.1  | 5.1                                                             | 4.3   | 3.3   |
|                 |              |                      | Complex with SecB     | 64.0                                                | 52.3  | 41.7  | 2.2                                                             | 1.8   | 1.5   |
|                 |              |                      | Complex with TF (Tig) | 68.7                                                | 58.0  | 44.8  | 2.7                                                             | 2.3   | 1.8   |
| P0A9G4          | CueR         | Cytoplasm            | Monomer               | 146.3                                               | 123.6 | 95.4  | 16.6                                                            | 14.0  | 10.8  |
|                 |              |                      | Homodimer             | 111.5                                               | 91.1  | 72.7  | 9.0                                                             | 7.4   | 5.9   |
| P38054          | CusA         | Cell inner membrane  | Monomer               | 66.3                                                | 56.0  | 43.3  | 2.5                                                             | 2.1   | 1.6   |
|                 |              |                      | Complex with SecB     | 55.1                                                | 45.0  | 36.0  | 1.5                                                             | 1.2   | 1.0   |
| P77239          | CusB         |                      | Complex with TF (Tig) | 57.8                                                | 48.8  | 37.7  | 1.7                                                             | 1.4   | 1.1   |
|                 |              |                      | Monomer               | 96.3                                                | 81.3  | 62.8  | 6.4                                                             | 5.4   | 4.2   |
| P77211          | CusC         | Cell outer membrane  | Monomer               | 91.6                                                | 77.4  | 59.8  | 5.7                                                             | 4.8   | 3.7   |
|                 |              |                      | Complex with SecB     | 65.3                                                | 53.3  | 42.6  | 2.4                                                             | 1.9   | 1.5   |

| UniProtKB A. N. | Protein name | Subcellular location | Subunit               | $D_0 \left( \frac{\mu\text{m}^2}{\text{s}} \right)$ |       |       | $D_{\text{cyto}} \left( \frac{\mu\text{m}^2}{\text{s}} \right)$ |       |       |
|-----------------|--------------|----------------------|-----------------------|-----------------------------------------------------|-------|-------|-----------------------------------------------------------------|-------|-------|
|                 |              |                      |                       | 310 K                                               | 303 K | 293 K | 310 K                                                           | 303 K | 293 K |
|                 |              |                      | Complex with TF (Tig) | 70.4                                                | 59.5  | 45.9  | 2.9                                                             | 2.4   | 1.9   |
|                 |              |                      | Monomer               | 159.3                                               | 134.6 | 104.0 | 19.8                                                            | 16.8  | 12.9  |
| P77214          | CusF         | Periplasm            | Complex with SecB     | 75.8                                                | 62.0  | 49.5  | 3.5                                                             | 2.9   | 2.3   |
|                 |              |                      | Complex with TF (Tig) | 85.2                                                | 72.0  | 55.6  | 4.7                                                             | 4.0   | 3.1   |
| P0ACZ8          | CusR         | Cytoplasm            | Monomer               | 119.7                                               | 101.1 | 78.1  | 10.7                                                            | 9.0   | 7.0   |
|                 |              |                      | Monomer               | 89.2                                                | 75.4  | 58.2  | 5.3                                                             | 4.5   | 3.5   |
| P77485          | CusS         | Cell inner membrane  | Complex with SecB     | 64.5                                                | 52.7  | 42.1  | 2.3                                                             | 1.9   | 1.5   |
|                 |              |                      | Complex with TF (Tig) | 69.4                                                | 58.7  | 45.3  | 2.8                                                             | 2.4   | 1.8   |
| P69488          | CutA         | Cytoplasm            | Monomer               | 158.9                                               | 134.3 | 103.7 | 19.7                                                            | 16.7  | 12.9  |
|                 |              |                      | Homotrimer            | 103.3                                               | 84.4  | 67.4  | 7.6                                                             | 6.2   | 4.9   |
| P67826          | CutC         | Cytoplasm            | Monomer               | 117.3                                               | 99.1  | 76.5  | 10.2                                                            | 8.6   | 6.6   |
|                 |              |                      | Homodimer             | 89.4                                                | 73.0  | 58.3  | 5.3                                                             | 4.4   | 3.5   |
|                 |              |                      | Monomer               | 137.3                                               | 116.0 | 89.6  | 14.4                                                            | 12.2  | 9.4   |
| P08550          | CvpA         | Cell inner membrane  | Complex with SecB     | 73.9                                                | 60.4  | 48.2  | 3.3                                                             | 2.7   | 2.1   |
|                 |              |                      | Complex with TF (Tig) | 82.3                                                | 69.5  | 53.7  | 4.3                                                             | 3.7   | 2.8   |
|                 |              |                      | Monomer               | 84.2                                                | 71.2  | 55.0  | 4.6                                                             | 3.9   | 3.0   |
| P76007          | CvrA         | Cell inner membrane  | Complex with SecB     | 62.9                                                | 51.3  | 41.0  | 2.1                                                             | 1.7   | 1.4   |
|                 |              |                      | Complex with TF (Tig) | 67.3                                                | 56.8  | 43.9  | 2.6                                                             | 2.2   | 1.7   |
| P00936          | CyaA         | Cytoplasm            | Monomer               | 70.6                                                | 59.7  | 46.1  | 2.9                                                             | 2.5   | 1.9   |
| P27838          | CyaY         |                      | Monomer               | 159.4                                               | 134.7 | 104.0 | 19.9                                                            | 16.8  | 13.0  |
|                 |              |                      | Monomer               | 130.7                                               | 110.5 | 85.3  | 13.0                                                            | 11.0  | 8.5   |
| P0ABE5          | CybB         | Cell inner membrane  | Complex with SecB     | 73.1                                                | 59.7  | 47.7  | 3.2                                                             | 2.6   | 2.1   |
|                 |              |                      | Complex with TF (Tig) | 81.2                                                | 68.6  | 53.0  | 4.2                                                             | 3.5   | 2.7   |
|                 |              |                      | Monomer               | 90.6                                                | 76.6  | 59.1  | 5.5                                                             | 4.7   | 3.6   |
| P0AAE0          | CycA         | Cell inner membrane  | Complex with SecB     | 65.0                                                | 53.1  | 42.4  | 2.3                                                             | 1.9   | 1.5   |
|                 |              |                      | Complex with TF (Tig) | 70.0                                                | 59.1  | 45.7  | 2.9                                                             | 2.4   | 1.9   |
|                 |              |                      | Monomer               | 86.5                                                | 73.1  | 56.4  | 4.9                                                             | 4.2   | 3.2   |
| P0ABJ9          | CydA         | Cell inner membrane  | Complex with SecB     | 63.6                                                | 52.0  | 41.5  | 2.2                                                             | 1.8   | 1.4   |
|                 |              |                      | Complex with TF (Tig) | 68.3                                                | 57.7  | 44.6  | 2.7                                                             | 2.3   | 1.7   |
|                 |              |                      | Monomer               | 97.9                                                | 82.7  | 63.9  | 6.7                                                             | 5.6   | 4.3   |
| P0ABK2          | CydB         | Cell inner membrane  | Complex with SecB     | 67.0                                                | 54.8  | 43.7  | 2.5                                                             | 2.1   | 1.7   |

| UniProtKB A. N. | Protein name | Subcellular location | Subunit               | $D_0 \left( \frac{\mu\text{m}^2}{\text{s}} \right)$ |       |       | $D_{\text{cyto}} \left( \frac{\mu\text{m}^2}{\text{s}} \right)$ |       |       |
|-----------------|--------------|----------------------|-----------------------|-----------------------------------------------------|-------|-------|-----------------------------------------------------------------|-------|-------|
|                 |              |                      |                       | 310 K                                               | 303 K | 293 K | 310 K                                                           | 303 K | 293 K |
|                 |              |                      | Complex with TF (Tig) | 72.7                                                | 61.4  | 47.4  | 3.2                                                             | 2.7   | 2.1   |
| P23886          | CydC         | Cell inner membrane  | Monomer               | 83.9                                                | 70.9  | 54.7  | 4.6                                                             | 3.8   | 3.0   |
|                 |              |                      | Complex with SecB     | 62.7                                                | 51.3  | 40.9  | 2.1                                                             | 1.7   | 1.4   |
|                 |              |                      | Complex with TF (Tig) | 67.1                                                | 56.7  | 43.8  | 2.6                                                             | 2.2   | 1.7   |
|                 |              |                      | Monomer               | 82.8                                                | 69.9  | 54.0  | 4.4                                                             | 3.7   | 2.9   |
| P29018          | CydD         | Cell inner membrane  | Complex with SecB     | 62.3                                                | 50.9  | 40.7  | 2.1                                                             | 1.7   | 1.4   |
|                 |              |                      | Complex with TF (Tig) | 66.6                                                | 56.3  | 43.5  | 2.5                                                             | 2.1   | 1.6   |
|                 |              |                      | Monomer               | 108.1                                               | 91.3  | 70.5  | 8.4                                                             | 7.1   | 5.5   |
| P00816          | CynS         |                      | Monomer               | 140.0                                               | 118.2 | 91.3  | 15.1                                                            | 12.7  | 9.8   |
| P0ABE9          | CynT         |                      | Homodecamer           | 56.8                                                | 46.4  | 37.0  | 1.6                                                             | 1.3   | 1.0   |
|                 |              |                      | Monomer               | 122.9                                               | 103.8 | 80.2  | 11.3                                                            | 9.5   | 7.4   |
| P17583          | CynX         | Cell inner membrane  | Monomer               | 98.9                                                | 83.5  | 64.5  | 6.8                                                             | 5.8   | 4.5   |
|                 |              |                      | Complex with SecB     | 67.3                                                | 55.0  | 43.9  | 2.6                                                             | 2.1   | 1.7   |
|                 |              |                      | Complex with TF (Tig) | 73.0                                                | 61.7  | 47.7  | 3.2                                                             | 2.7   | 2.1   |
| P0ABJ1          | CyoA         | Cell inner membrane  | Monomer               | 105.7                                               | 89.3  | 69.0  | 8.0                                                             | 6.7   | 5.2   |
|                 |              |                      | Complex with SecB     | 68.9                                                | 56.3  | 45.0  | 2.7                                                             | 2.2   | 1.8   |
|                 |              |                      | Complex with TF (Tig) | 75.2                                                | 63.5  | 49.1  | 3.4                                                             | 2.9   | 2.2   |
| P0ABI8          | CyoB         | Cell inner membrane  | Monomer               | 78.6                                                | 66.4  | 51.3  | 3.9                                                             | 3.3   | 2.5   |
|                 |              |                      | Complex with SecB     | 60.7                                                | 49.6  | 39.6  | 1.9                                                             | 1.6   | 1.3   |
|                 |              |                      | Complex with TF (Tig) | 64.6                                                | 54.6  | 42.2  | 2.3                                                             | 1.9   | 1.5   |
| P0ABJ3          | CyoC         | Cell inner membrane  | Monomer               | 125.3                                               | 105.8 | 81.7  | 11.8                                                            | 10.0  | 7.7   |
|                 |              |                      | Complex with SecB     | 72.4                                                | 59.1  | 47.2  | 3.1                                                             | 2.5   | 2.0   |
|                 |              |                      | Complex with TF (Tig) | 80.1                                                | 67.7  | 52.3  | 4.1                                                             | 3.4   | 2.6   |
| P0ABJ6          | CyoD         | Cell inner membrane  | Monomer               | 160.5                                               | 135.6 | 104.7 | 20.1                                                            | 17.0  | 13.1  |
|                 |              |                      | Complex with SecB     | 75.9                                                | 62.0  | 49.5  | 3.5                                                             | 2.9   | 2.3   |
|                 |              |                      | Complex with TF (Tig) | 85.3                                                | 72.1  | 55.7  | 4.8                                                             | 4.0   | 3.1   |
| P0AEA5          | CyoE         | Cell inner membrane  | Monomer               | 109.0                                               | 92.1  | 71.1  | 8.6                                                             | 7.3   | 5.6   |
|                 |              |                      | Complex with SecB     | 69.6                                                | 56.8  | 45.4  | 2.8                                                             | 2.3   | 1.8   |
|                 |              |                      | Complex with TF (Tig) | 76.2                                                | 64.4  | 49.7  | 3.6                                                             | 3.0   | 2.3   |
| P16676          | CysA         | Cell inner membrane  | Monomer               | 99.2                                                | 83.8  | 64.7  | 6.9                                                             | 5.8   | 4.5   |
|                 |              |                      | Complex with SecB     | 67.4                                                | 55.0  | 44.0  | 2.6                                                             | 2.1   | 1.7   |

| UniProtKB A. N. | Protein name | Subcellular location           | Subunit                 | $D_0 \left( \frac{\mu\text{m}^2}{\text{s}} \right)$ |       |       | $D_{\text{cyto}} \left( \frac{\mu\text{m}^2}{\text{s}} \right)$ |       |       |
|-----------------|--------------|--------------------------------|-------------------------|-----------------------------------------------------|-------|-------|-----------------------------------------------------------------|-------|-------|
|                 |              |                                |                         | 310 K                                               | 303 K | 293 K | 310 K                                                           | 303 K | 293 K |
|                 |              |                                | Complex with TF (Tig)   | 73.1                                                | 61.8  | 47.7  | 3.2                                                             | 2.7   | 2.1   |
| P0A9F3          | CysB         | Cytoplasm                      | Monomer                 | 104.2                                               | 88.1  | 68.0  | 7.7                                                             | 6.5   | 5.0   |
|                 |              |                                | Homotetramer            | 60.5                                                | 49.5  | 39.5  | 1.9                                                             | 1.6   | 1.3   |
| P0A6J1          | CysC         |                                | Monomer                 | 125.9                                               | 106.4 | 82.2  | 11.9                                                            | 10.1  | 7.8   |
| P21156          | CysD         |                                | Monomer                 | 105.4                                               | 89.0  | 68.7  | 7.9                                                             | 6.7   | 5.2   |
|                 |              |                                | Heterodimer (CysD–CysN) | 73.6                                                | 62.2  | 48.1  | 3.3                                                             | 2.8   | 2.1   |
| P0A9D4          | CysE         | Cytoplasm                      | Monomer                 | 113.2                                               | 95.6  | 73.8  | 9.4                                                             | 7.9   | 6.1   |
|                 |              |                                | Homohexamer             | 56.1                                                | 45.8  | 36.6  | 1.5                                                             | 1.3   | 1.0   |
| P0AEA8          | CysG         |                                | Monomer                 | 91.8                                                | 77.6  | 59.9  | 5.7                                                             | 4.8   | 3.7   |
| P17854          | CysH         | Cytoplasm                      | Monomer                 | 115.3                                               | 97.4  | 75.2  | 9.8                                                             | 8.3   | 6.4   |
|                 |              |                                | Homodimer               | 87.8                                                | 71.8  | 57.3  | 5.1                                                             | 4.2   | 3.3   |
| P17846          | CysI         |                                | Monomer                 | 83.3                                                | 70.4  | 54.4  | 4.5                                                             | 3.8   | 2.9   |
| P38038          | CysJ         |                                | Monomer                 | 82.2                                                | 69.4  | 53.6  | 4.3                                                             | 3.7   | 2.8   |
| P0ABK5          | CysK         |                                | Monomer                 | 106.2                                               | 89.7  | 69.3  | 8.1                                                             | 6.8   | 5.3   |
|                 |              |                                | Homodimer               | 80.9                                                | 66.1  | 52.8  | 4.2                                                             | 3.4   | 2.7   |
| P16703          | CysM         |                                | Monomer                 | 108.5                                               | 91.6  | 70.8  | 8.5                                                             | 7.2   | 5.5   |
|                 |              |                                | Homodimer               | 82.7                                                | 67.5  | 53.9  | 4.4                                                             | 3.6   | 2.9   |
| P23845          | CysN         |                                | Monomer                 | 90.0                                                | 76.1  | 58.7  | 5.4                                                             | 4.6   | 3.5   |
|                 |              |                                | Heterodimer (CysD–CysN) | 73.6                                                | 62.2  | 48.1  | 3.3                                                             | 2.8   | 2.1   |
| P16700          | CysP         | Periplasm                      | Monomer                 | 102.6                                               | 86.7  | 67.0  | 7.5                                                             | 6.3   | 4.9   |
|                 |              |                                | Complex with SecB       | 68.2                                                | 55.7  | 44.5  | 2.7                                                             | 2.2   | 1.7   |
|                 |              |                                | Complex with TF (Tig)   | 74.3                                                | 62.8  | 48.5  | 3.3                                                             | 2.8   | 2.2   |
| P22255          | CysQ         | Cytoplasm. Cell inner membrane | Monomer                 | 116.6                                               | 98.5  | 76.1  | 10.0                                                            | 8.5   | 6.5   |
| P21888          | CysS         | Cytoplasm                      | Monomer                 | 90.3                                                | 76.3  | 58.9  | 5.5                                                             | 4.6   | 3.6   |
| P16701          | CysU         | Cell inner membrane            | Monomer                 | 111.7                                               | 94.4  | 72.9  | 9.1                                                             | 7.7   | 5.9   |
|                 |              |                                | Complex with SecB       | 70.1                                                | 57.3  | 45.8  | 2.9                                                             | 2.3   | 1.9   |
|                 |              |                                | Complex with TF (Tig)   | 76.9                                                | 65.0  | 50.2  | 3.7                                                             | 3.1   | 2.4   |
| P0AEB0          | CysW         | Cell inner membrane            | Monomer                 | 108.6                                               | 91.8  | 70.9  | 8.5                                                             | 7.2   | 5.6   |
|                 |              |                                | Complex with SecB       | 69.5                                                | 56.8  | 45.4  | 2.8                                                             | 2.3   | 1.8   |
|                 |              |                                | Complex with TF (Tig)   | 76.1                                                | 64.3  | 49.6  | 3.6                                                             | 3.0   | 2.3   |

| UniProtKB A. N. | Protein name | Subcellular location | Subunit               | $D_0 \left( \frac{\mu\text{m}^2}{\text{s}} \right)$ |       |       | $D_{\text{cyto}} \left( \frac{\mu\text{m}^2}{\text{s}} \right)$ |       |       |
|-----------------|--------------|----------------------|-----------------------|-----------------------------------------------------|-------|-------|-----------------------------------------------------------------|-------|-------|
|                 |              |                      |                       | 310 K                                               | 303 K | 293 K | 310 K                                                           | 303 K | 293 K |
| P0A6J3          | CysZ         | Cell inner membrane  | Monomer               | 113.2                                               | 95.6  | 73.9  | 9.4                                                             | 7.9   | 6.1   |
|                 |              |                      | Complex with SecB     | 70.4                                                | 57.5  | 45.9  | 2.9                                                             | 2.4   | 1.9   |
|                 |              |                      | Complex with TF (Tig) | 77.3                                                | 65.3  | 50.4  | 3.7                                                             | 3.1   | 2.4   |
| P0ACN7          | CytR         |                      | Monomer               | 102.4                                               | 86.5  | 66.8  | 7.4                                                             | 6.3   | 4.8   |
| P0AEB2          | DacA         | Cell inner membrane  | Monomer               | 96.1                                                | 81.2  | 62.7  | 6.4                                                             | 5.4   | 4.2   |
| P24228          | DacB         | Periplasm            | Monomer               | 90.5                                                | 76.5  | 59.1  | 5.5                                                             | 4.7   | 3.6   |
|                 |              |                      | Complex with SecB     | 64.9                                                | 53.1  | 42.4  | 2.3                                                             | 1.9   | 1.5   |
|                 |              |                      | Complex with TF (Tig) | 70.0                                                | 59.1  | 45.7  | 2.8                                                             | 2.4   | 1.9   |
| P08506          | DacC         | Cell inner membrane  | Monomer               | 96.9                                                | 81.8  | 63.2  | 6.5                                                             | 5.5   | 4.2   |
|                 |              |                      | Complex with SecB     | 66.8                                                | 54.5  | 43.6  | 2.5                                                             | 2.1   | 1.6   |
|                 |              |                      | Complex with TF (Tig) | 72.3                                                | 61.1  | 47.2  | 3.1                                                             | 2.6   | 2.0   |
| P33013          | DacD         | Cell inner membrane  | Monomer               | 97.1                                                | 82.0  | 63.4  | 6.5                                                             | 5.5   | 4.3   |
|                 |              |                      | Complex with SecB     | 66.8                                                | 54.6  | 43.6  | 2.5                                                             | 2.1   | 1.6   |
|                 |              |                      | Complex with TF (Tig) | 72.4                                                | 61.2  | 47.3  | 3.1                                                             | 2.6   | 2.0   |
| P0A6J5          | DadA         | Cell inner membrane  | Monomer               | 93.6                                                | 79.1  | 61.1  | 6.0                                                             | 5.0   | 3.9   |
|                 |              |                      | Complex with SecB     | 65.8                                                | 53.8  | 43.0  | 2.4                                                             | 2.0   | 1.6   |
|                 |              |                      | Complex with TF (Tig) | 71.1                                                | 60.1  | 46.4  | 3.0                                                             | 2.5   | 1.9   |
| P29012          | DadX         |                      | Monomer               | 101.3                                               | 85.6  | 66.1  | 7.2                                                             | 6.1   | 4.7   |
| P0AEE8          | Dam          |                      | Monomer               | 109.2                                               | 92.3  | 71.3  | 8.6                                                             | 7.3   | 5.6   |
| P11557          | DamX         | Cell membrane        | Monomer               | 94.7                                                | 80.0  | 61.8  | 6.2                                                             | 5.2   | 4.0   |
|                 |              |                      | Complex with SecB     | 66.2                                                | 54.1  | 43.2  | 2.5                                                             | 2.0   | 1.6   |
|                 |              |                      | Complex with TF (Tig) | 71.6                                                | 60.5  | 46.7  | 3.0                                                             | 2.6   | 2.0   |
| P0A6L2          | DapA         | Cytoplasm            | Monomer               | 110.3                                               | 93.2  | 72.0  | 8.8                                                             | 7.5   | 5.8   |
|                 |              |                      | Homotetramer          | 64.1                                                | 52.4  | 41.8  | 2.2                                                             | 1.8   | 1.5   |
| P04036          | DapB         | Cytoplasm            | Monomer               | 114.0                                               | 96.3  | 74.4  | 9.5                                                             | 8.1   | 6.2   |
|                 |              |                      | Homotetramer          | 66.2                                                | 54.1  | 43.2  | 2.5                                                             | 2.0   | 1.6   |
| P0A9D8          | DapD         | Cytoplasm            | Monomer               | 112.3                                               | 94.9  | 73.3  | 9.2                                                             | 7.8   | 6.0   |
|                 |              |                      | Homotrimer            | 73.0                                                | 59.6  | 47.6  | 3.2                                                             | 2.6   | 2.1   |
| P0AED7          | DapE         |                      | Monomer               | 99.0                                                | 83.6  | 64.6  | 6.8                                                             | 5.8   | 4.5   |
|                 |              |                      | Homodimer             | 75.4                                                | 61.6  | 49.2  | 3.5                                                             | 2.8   | 2.3   |
| P0A6K1          | DapF         | Cytoplasm            | Monomer               | 111.8                                               | 94.5  | 73.0  | 9.1                                                             | 7.7   | 5.9   |

| UniProtKB A. N. | Protein name | Subcellular location | Subunit               | $D_0 \left( \frac{\mu\text{m}^2}{\text{s}} \right)$ |       |       | $D_{\text{cyto}} \left( \frac{\mu\text{m}^2}{\text{s}} \right)$ |       |       |
|-----------------|--------------|----------------------|-----------------------|-----------------------------------------------------|-------|-------|-----------------------------------------------------------------|-------|-------|
|                 |              |                      |                       | 310 K                                               | 303 K | 293 K | 310 K                                                           | 303 K | 293 K |
| P21693          | DbpA         | Cytoplasm            | Monomer               | 92.4                                                | 78.1  | 60.3  | 5.8                                                             | 4.9   | 3.8   |
| P28248          | Dcd          |                      | Monomer               | 128.4                                               | 108.5 | 83.8  | 12.5                                                            | 10.5  | 8.1   |
|                 |              |                      | Homotetramer          | 74.6                                                | 60.9  | 48.7  | 3.4                                                             | 2.8   | 2.2   |
| P0AED9          | Dcm          |                      | Monomer               | 89.4                                                | 75.5  | 58.4  | 5.3                                                             | 4.5   | 3.5   |
| P24171          | Dcp          | Cytoplasm            | Monomer               | 77.3                                                | 65.3  | 50.4  | 3.7                                                             | 3.1   | 2.4   |
| P0AEE1          | DcrB         | Periplasm            | Monomer               | 132.0                                               | 111.5 | 86.2  | 13.3                                                            | 11.2  | 8.6   |
|                 |              |                      | Complex with SecB     | 73.3                                                | 59.8  | 47.8  | 3.2                                                             | 2.6   | 2.1   |
|                 |              |                      | Complex with TF (Tig) | 81.4                                                | 68.8  | 53.1  | 4.2                                                             | 3.6   | 2.8   |
| P0A830          | DctA         | Cell inner membrane  | Monomer               | 95.3                                                | 80.5  | 62.2  | 6.2                                                             | 5.3   | 4.1   |
|                 |              |                      | Complex with SecB     | 66.3                                                | 54.2  | 43.3  | 2.5                                                             | 2.0   | 1.6   |
|                 |              |                      | Complex with TF (Tig) | 71.8                                                | 60.6  | 46.8  | 3.0                                                             | 2.6   | 2.0   |
| P37195          | DctR         |                      | Monomer               | 130.4                                               | 110.2 | 85.1  | 12.9                                                            | 10.9  | 8.4   |
| P0ABN5          | DcuA         | Cell inner membrane  | Monomer               | 95.1                                                | 80.3  | 62.0  | 6.2                                                             | 5.2   | 4.0   |
|                 |              |                      | Complex with SecB     | 66.3                                                | 54.1  | 43.2  | 2.5                                                             | 2.0   | 1.6   |
|                 |              |                      | Complex with TF (Tig) | 71.7                                                | 60.6  | 46.8  | 3.0                                                             | 2.6   | 2.0   |
| P0ABN9          | DcuB         | Cell inner membrane  | Monomer               | 93.3                                                | 78.8  | 60.9  | 5.9                                                             | 5.0   | 3.9   |
|                 |              |                      | Complex with SecB     | 65.8                                                | 53.7  | 42.9  | 2.4                                                             | 2.0   | 1.6   |
|                 |              |                      | Complex with TF (Tig) | 71.0                                                | 60.0  | 46.4  | 3.0                                                             | 2.5   | 1.9   |
| P0ABP3          | DcuC         | Cell inner membrane  | Monomer               | 93.0                                                | 78.5  | 60.7  | 5.9                                                             | 5.0   | 3.8   |
|                 |              |                      | Complex with SecB     | 65.7                                                | 53.6  | 42.9  | 2.4                                                             | 2.0   | 1.6   |
|                 |              |                      | Complex with TF (Tig) | 70.9                                                | 59.9  | 46.3  | 3.0                                                             | 2.5   | 1.9   |
| P45428          | DcuD         | Cell inner membrane  | Monomer               | 92.7                                                | 78.3  | 60.5  | 5.8                                                             | 4.9   | 3.8   |
|                 |              |                      | Complex with SecB     | 65.6                                                | 53.6  | 42.8  | 2.4                                                             | 2.0   | 1.6   |
|                 |              |                      | Complex with TF (Tig) | 70.8                                                | 59.8  | 46.2  | 2.9                                                             | 2.5   | 1.9   |
| P0AD01          | DcuR         | Cytoplasm            | Monomer               | 116.1                                               | 98.1  | 75.7  | 9.9                                                             | 8.4   | 6.5   |
| P0AEC8          | DcuS         | Cell inner membrane  | Monomer               | 85.2                                                | 71.9  | 55.6  | 4.7                                                             | 4.0   | 3.1   |
|                 |              |                      | Complex with SecB     | 63.2                                                | 51.6  | 41.2  | 2.2                                                             | 1.8   | 1.4   |
|                 |              |                      | Complex with TF (Tig) | 67.7                                                | 57.2  | 44.2  | 2.6                                                             | 2.2   | 1.7   |
| P76316          | DcyD         |                      | Monomer               | 105.4                                               | 89.0  | 68.8  | 7.9                                                             | 6.7   | 5.2   |
|                 |              |                      | Homodimer             | 80.3                                                | 65.6  | 52.4  | 4.1                                                             | 3.3   | 2.7   |
| P0A6J8          | DdlA         | Cytoplasm            | Monomer               | 100.9                                               | 85.2  | 65.8  | 7.2                                                             | 6.0   | 4.7   |

| UniProtKB A. N. | Protein name | Subcellular location | Subunit               | $D_0 \left( \frac{\mu\text{m}^2}{\text{s}} \right)$ |       |       | $D_{\text{cyto}} \left( \frac{\mu\text{m}^2}{\text{s}} \right)$ |       |       |
|-----------------|--------------|----------------------|-----------------------|-----------------------------------------------------|-------|-------|-----------------------------------------------------------------|-------|-------|
|                 |              |                      |                       | 310 K                                               | 303 K | 293 K | 310 K                                                           | 303 K | 293 K |
| P07862          | DdlB         | Cytoplasm            | Monomer               | 108.2                                               | 91.4  | 70.6  | 8.4                                                             | 7.1   | 5.5   |
| P76128          | DdpA         | Periplasm            | Monomer               | 86.8                                                | 73.3  | 56.7  | 5.0                                                             | 4.2   | 3.2   |
|                 |              |                      | Complex with SecB     | 63.7                                                | 52.1  | 41.6  | 2.2                                                             | 1.8   | 1.4   |
|                 |              |                      | Complex with TF (Tig) | 68.4                                                | 57.8  | 44.6  | 2.7                                                             | 2.3   | 1.8   |
| P77308          | DdpB         | Cell inner membrane  | Monomer               | 102.9                                               | 87.0  | 67.2  | 7.5                                                             | 6.3   | 4.9   |
|                 |              |                      | Complex with SecB     | 68.3                                                | 55.8  | 44.5  | 2.7                                                             | 2.2   | 1.7   |
|                 |              |                      | Complex with TF (Tig) | 74.4                                                | 62.8  | 48.5  | 3.3                                                             | 2.8   | 2.2   |
| P77463          | DdpC         | Cell inner membrane  | Monomer               | 109.4                                               | 92.4  | 71.4  | 8.7                                                             | 7.3   | 5.6   |
|                 |              |                      | Complex with SecB     | 69.7                                                | 56.9  | 45.5  | 2.8                                                             | 2.3   | 1.8   |
|                 |              |                      | Complex with TF (Tig) | 76.3                                                | 64.5  | 49.8  | 3.6                                                             | 3.0   | 2.3   |
| P77268          | DdpD         | Cell inner membrane  | Monomer               | 104.3                                               | 88.1  | 68.1  | 7.7                                                             | 6.5   | 5.1   |
|                 |              |                      | Complex with SecB     | 68.6                                                | 56.0  | 44.8  | 2.7                                                             | 2.2   | 1.8   |
|                 |              |                      | Complex with TF (Tig) | 74.8                                                | 63.2  | 48.8  | 3.4                                                             | 2.9   | 2.2   |
| P77622          | DdpF         | Cell inner membrane  | Monomer               | 106.0                                               | 89.6  | 69.2  | 8.0                                                             | 6.8   | 5.3   |
|                 |              |                      | Complex with SecB     | 69.0                                                | 56.3  | 45.0  | 2.7                                                             | 2.2   | 1.8   |
|                 |              |                      | Complex with TF (Tig) | 75.3                                                | 63.6  | 49.2  | 3.5                                                             | 2.9   | 2.3   |
| P77790          | DdpX         | Secreted             | Monomer               | 128.5                                               | 108.5 | 83.8  | 12.5                                                            | 10.5  | 8.1   |
|                 |              |                      | Complex with SecB     | 72.8                                                | 59.5  | 47.5  | 3.2                                                             | 2.6   | 2.1   |
|                 |              |                      | Complex with TF (Tig) | 80.7                                                | 68.2  | 52.7  | 4.1                                                             | 3.5   | 2.7   |
| P0A9P6          | DeaD         | Cytoplasm            | Monomer               | 80.2                                                | 67.8  | 52.3  | 4.1                                                             | 3.4   | 2.7   |
| P0ABP6          | DedA         | Cell inner membrane  | Monomer               | 121.4                                               | 102.6 | 79.2  | 11.0                                                            | 9.3   | 7.2   |
|                 |              |                      | Complex with SecB     | 71.8                                                | 58.6  | 46.8  | 3.1                                                             | 2.5   | 2.0   |
|                 |              |                      | Complex with TF (Tig) | 79.3                                                | 67.0  | 51.7  | 3.9                                                             | 3.3   | 2.6   |
| P09549          | DedD         |                      | Monomer               | 124.6                                               | 105.3 | 81.3  | 11.7                                                            | 9.8   | 7.6   |
| P0A6K3          | Def          |                      | Monomer               | 133.2                                               | 112.6 | 86.9  | 13.5                                                            | 11.4  | 8.8   |
| P0C0V0          | DegP         | Periplasm            | Monomer               | 92.3                                                | 77.9  | 60.2  | 5.8                                                             | 4.9   | 3.8   |
|                 |              |                      | Complex with SecB     | 65.5                                                | 53.5  | 42.7  | 2.4                                                             | 1.9   | 1.6   |
|                 |              |                      | Complex with TF (Tig) | 70.6                                                | 59.7  | 46.1  | 2.9                                                             | 2.5   | 1.9   |
| P39099          | DegQ         | Periplasm            | Monomer               | 93.9                                                | 79.3  | 61.3  | 6.0                                                             | 5.1   | 3.9   |
|                 |              |                      | Complex with SecB     | 65.9                                                | 53.9  | 43.0  | 2.4                                                             | 2.0   | 1.6   |
|                 |              |                      | Complex with TF (Tig) | 71.3                                                | 60.2  | 46.5  | 3.0                                                             | 2.5   | 2.0   |

| UniProtKB A. N. | Protein name | Subcellular location | Subunit               | $D_0 \left( \frac{\mu\text{m}^2}{\text{s}} \right)$ |       |       | $D_{\text{cyto}} \left( \frac{\mu\text{m}^2}{\text{s}} \right)$ |       |       |
|-----------------|--------------|----------------------|-----------------------|-----------------------------------------------------|-------|-------|-----------------------------------------------------------------|-------|-------|
|                 |              |                      |                       | 310 K                                               | 303 K | 293 K | 310 K                                                           | 303 K | 293 K |
| P0AEE3          | DegS         | Periplasm            | Monomer               | 102.7                                               | 86.7  | 67.0  | 7.5                                                             | 6.3   | 4.9   |
|                 |              |                      | Complex with SecB     | 68.2                                                | 55.7  | 44.5  | 2.7                                                             | 2.2   | 1.7   |
|                 |              |                      | Complex with TF (Tig) | 74.3                                                | 62.8  | 48.5  | 3.3                                                             | 2.8   | 2.2   |
| P07650          | DeoA         |                      | Monomer               | 93.9                                                | 79.3  | 61.3  | 6.0                                                             | 5.1   | 3.9   |
|                 |              |                      | Homodimer             | 71.6                                                | 58.5  | 46.7  | 3.0                                                             | 2.5   | 2.0   |
| P0A6K6          | DeoB         | Cytoplasm            | Monomer               | 96.2                                                | 81.3  | 62.8  | 6.4                                                             | 5.4   | 4.2   |
| P0A6L0          | DeoC         | Cytoplasm            | Monomer               | 115.7                                               | 97.7  | 75.5  | 9.8                                                             | 8.3   | 6.4   |
|                 |              |                      | Homodimer             | 88.1                                                | 72.0  | 57.5  | 5.2                                                             | 4.2   | 3.4   |
| P0ABP8          | DeoD         |                      | Monomer               | 118.7                                               | 100.3 | 77.5  | 10.4                                                            | 8.8   | 6.8   |
|                 |              |                      | Homoheptamer          | 58.8                                                | 48.0  | 38.4  | 1.8                                                             | 1.4   | 1.2   |
| P0ACK5          | DeoR         |                      | Monomer               | 114.4                                               | 96.6  | 74.6  | 9.6                                                             | 8.1   | 6.3   |
|                 |              |                      | Homooctamer           | 50.6                                                | 41.3  | 33.0  | 1.2                                                             | 0.9   | 0.8   |
| P0A6P5          | Der          |                      | Monomer               | 88.4                                                | 74.7  | 57.7  | 5.2                                                             | 4.4   | 3.4   |
| P0ABN1          | DgkA         | Cell inner membrane  | Monomer               | 154.5                                               | 130.5 | 100.8 | 18.6                                                            | 15.7  | 12.1  |
|                 |              |                      | Complex with SecB     | 75.5                                                | 61.7  | 49.3  | 3.5                                                             | 2.8   | 2.3   |
|                 |              |                      | Complex with TF (Tig) | 84.7                                                | 71.5  | 55.3  | 4.7                                                             | 3.9   | 3.0   |
| Q6BF16          | DgoA         |                      | Monomer               | 128.1                                               | 108.2 | 83.6  | 12.4                                                            | 10.5  | 8.1   |
| Q6BF17          | DgoD         |                      | Monomer               | 97.8                                                | 82.6  | 63.8  | 6.6                                                             | 5.6   | 4.3   |
| P31459          | DgoK         |                      | Monomer               | 110.2                                               | 93.1  | 71.9  | 8.8                                                             | 7.4   | 5.7   |
| P31460          | DgoR         |                      | Monomer               | 118.5                                               | 100.1 | 77.3  | 10.4                                                            | 8.8   | 6.8   |
| P0AA76          | DgoT         | Cell inner membrane  | Monomer               | 94.0                                                | 79.4  | 61.3  | 6.0                                                             | 5.1   | 3.9   |
|                 |              |                      | Complex with SecB     | 66.0                                                | 53.9  | 43.0  | 2.4                                                             | 2.0   | 1.6   |
|                 |              |                      | Complex with TF (Tig) | 71.3                                                | 60.2  | 46.5  | 3.0                                                             | 2.5   | 2.0   |
| P15723          | Dgt          |                      | Monomer               | 85.8                                                | 72.5  | 56.0  | 4.8                                                             | 4.1   | 3.1   |
|                 |              |                      | Homotetramer          | 49.8                                                | 40.7  | 32.5  | 1.1                                                             | 0.9   | 0.7   |
| P76015          | DhaK         |                      | Monomer               | 102.0                                               | 86.2  | 66.6  | 7.3                                                             | 6.2   | 4.8   |
|                 |              |                      | Homodimer             | 77.7                                                | 63.5  | 50.7  | 3.8                                                             | 3.1   | 2.4   |
| P76014          | DhaL         |                      | Monomer               | 125.3                                               | 105.8 | 81.7  | 11.8                                                            | 10.0  | 7.7   |
|                 |              |                      | Homodimer             | 95.5                                                | 78.0  | 62.3  | 6.3                                                             | 5.1   | 4.1   |
| P37349          | DhaM         |                      | Monomer               | 90.8                                                | 76.7  | 59.2  | 5.5                                                             | 4.7   | 3.6   |
|                 |              |                      | Homodimer             | 69.2                                                | 56.5  | 45.1  | 2.8                                                             | 2.3   | 1.8   |



| UniProtKB A. N. | Protein name | Subcellular location | Subunit               | $D_0 \left( \frac{\mu\text{m}^2}{\text{s}} \right)$ |       |       | $D_{\text{cyto}} \left( \frac{\mu\text{m}^2}{\text{s}} \right)$ |       |       |
|-----------------|--------------|----------------------|-----------------------|-----------------------------------------------------|-------|-------|-----------------------------------------------------------------|-------|-------|
|                 |              |                      |                       | 310 K                                               | 303 K | 293 K | 310 K                                                           | 303 K | 293 K |
| P76016          | DhaR         |                      | Monomer               | 80.2                                                | 67.8  | 52.3  | 4.1                                                             | 3.4   | 2.7   |
| P66817          | DiaA         |                      | Monomer               | 128.7                                               | 108.7 | 84.0  | 12.5                                                            | 10.6  | 8.2   |
|                 |              |                      | Homodimer             | 98.1                                                | 80.1  | 64.0  | 6.7                                                             | 5.5   | 4.4   |
| P06966          | DicA         |                      | Monomer               | 144.7                                               | 122.3 | 94.4  | 16.2                                                            | 13.7  | 10.6  |
| P09557          | DicB         |                      | Monomer               | 198.8                                               | 168.0 | 129.7 | 31.1                                                            | 26.3  | 20.3  |
| P06965          | DicC         |                      | Monomer               | 183.2                                               | 154.8 | 119.6 | 26.4                                                            | 22.3  | 17.2  |
| Q47155          | DinB         | Cytoplasm            | Monomer               | 100.7                                               | 85.0  | 65.7  | 7.1                                                             | 6.0   | 4.6   |
| P23840          | DinD         |                      | Monomer               | 110.6                                               | 93.4  | 72.2  | 8.9                                                             | 7.5   | 5.8   |
| P28303          | DinF         | Cell inner membrane  | Monomer               | 92.1                                                | 77.8  | 60.1  | 5.7                                                             | 4.8   | 3.7   |
|                 |              |                      | Complex with SecB     | 65.4                                                | 53.4  | 42.7  | 2.4                                                             | 1.9   | 1.6   |
|                 |              |                      | Complex with TF (Tig) | 70.6                                                | 59.6  | 46.0  | 2.9                                                             | 2.5   | 1.9   |
| P27296          | DinG         |                      | Monomer               | 75.8                                                | 64.1  | 49.5  | 3.5                                                             | 3.0   | 2.3   |
| P0ABR1          | DinI         |                      | Monomer               | 180.2                                               | 152.2 | 117.6 | 25.6                                                            | 21.6  | 16.7  |
| Q47150          | DinJ         |                      | Monomer               | 176.7                                               | 149.3 | 115.3 | 24.6                                                            | 20.7  | 16.0  |
| A5A624          | DinQ         | Membrane             | Monomer               | 228.5                                               | 193.0 | 149.1 | 40.7                                                            | 34.4  | 26.6  |
|                 |              |                      | Complex with SecB     | 78.7                                                | 64.3  | 51.4  | 3.9                                                             | 3.2   | 2.5   |
|                 |              |                      | Complex with TF (Tig) | 89.7                                                | 75.8  | 58.5  | 5.4                                                             | 4.5   | 3.5   |
| P31680          | DjlA         | Cell inner membrane  | Monomer               | 111.3                                               | 94.0  | 72.6  | 9.0                                                             | 7.6   | 5.9   |
|                 |              |                      | Complex with SecB     | 70.0                                                | 57.2  | 45.7  | 2.9                                                             | 2.3   | 1.9   |
|                 |              |                      | Complex with TF (Tig) | 76.8                                                | 64.9  | 50.1  | 3.6                                                             | 3.1   | 2.4   |
| P77381          | DjlB         |                      | Monomer               | 88.3                                                | 74.6  | 57.6  | 5.2                                                             | 4.4   | 3.4   |
| P77359          | DjlC         |                      | Monomer               | 88.0                                                | 74.3  | 57.4  | 5.1                                                             | 4.3   | 3.4   |
| Q46857          | DkgA         | Cytoplasm            | Monomer               | 110.6                                               | 93.4  | 72.1  | 8.9                                                             | 7.5   | 5.8   |
| P30863          | DkgB         | Cytoplasm            | Monomer               | 113.0                                               | 95.5  | 73.7  | 9.3                                                             | 7.9   | 6.1   |
| P0ABS1          | DksA         |                      | Monomer               | 138.4                                               | 117.0 | 90.3  | 14.7                                                            | 12.4  | 9.6   |
| P06149          | Dld          | Cell membrane        | Monomer               | 83.0                                                | 70.1  | 54.2  | 4.4                                                             | 3.7   | 2.9   |
| P37672          | DlgD         | Cytoplasm            | Monomer               | 103.8                                               | 87.7  | 67.7  | 7.7                                                             | 6.5   | 5.0   |
|                 |              |                      | Homodimer             | 79.1                                                | 64.6  | 51.6  | 3.9                                                             | 3.2   | 2.6   |
| P76251          | DmlA         | Cytoplasm            | Monomer               | 99.9                                                | 84.4  | 65.2  | 7.0                                                             | 5.9   | 4.6   |
| P76250          | DmlR         |                      | Monomer               | 106.0                                               | 89.6  | 69.2  | 8.0                                                             | 6.8   | 5.3   |
| P18775          | DmsA         | Cell membrane        | Monomer               | 72.8                                                | 61.5  | 47.5  | 3.2                                                             | 2.7   | 2.1   |

| UniProtKB A. N. | Protein name | Subcellular location           | Subunit               | $D_0 \left( \frac{\mu\text{m}^2}{\text{s}} \right)$ |       |       | $D_{\text{cyto}} \left( \frac{\mu\text{m}^2}{\text{s}} \right)$ |       |       |
|-----------------|--------------|--------------------------------|-----------------------|-----------------------------------------------------|-------|-------|-----------------------------------------------------------------|-------|-------|
|                 |              |                                |                       | 310 K                                               | 303 K | 293 K | 310 K                                                           | 303 K | 293 K |
| P18776          | DmsB         |                                | Monomer               | 124.7                                               | 105.4 | 81.4  | 11.7                                                            | 9.9   | 7.6   |
| P18777          | DmsC         | Cell inner membrane            | Monomer               | 111.0                                               | 93.7  | 72.4  | 9.0                                                             | 7.6   | 5.8   |
|                 |              |                                | Complex with SecB     | 70.0                                                | 57.2  | 45.7  | 2.9                                                             | 2.3   | 1.9   |
|                 |              |                                | Complex with TF (Tig) | 76.7                                                | 64.8  | 50.1  | 3.6                                                             | 3.1   | 2.4   |
| P69853          | DmsD         | Cell inner membrane            | Monomer               | 123.7                                               | 104.5 | 80.7  | 11.5                                                            | 9.7   | 7.5   |
| P03004          | DnaA         | Cytoplasm                      | Monomer               | 90.0                                                | 76.1  | 58.7  | 5.4                                                             | 4.6   | 3.5   |
| P0ACB0          | DnaB         |                                | Monomer               | 90.1                                                | 76.1  | 58.8  | 5.4                                                             | 4.6   | 3.6   |
|                 |              |                                | Homoheptamer          | 44.7                                                | 36.5  | 29.1  | 0.8                                                             | 0.6   | 0.5   |
| P0AEF0          | DnaC         |                                | Monomer               | 115.3                                               | 97.4  | 75.3  | 9.8                                                             | 8.3   | 6.4   |
| P10443          | DnaE         | Cytoplasm                      | Monomer               | 63.1                                                | 53.3  | 41.2  | 2.2                                                             | 1.8   | 1.4   |
| P0ABS5          | DnaG         |                                | Monomer               | 82.5                                                | 69.7  | 53.9  | 4.4                                                             | 3.7   | 2.9   |
| P08622          | DnaJ         | Cytoplasm                      | Monomer               | 99.1                                                | 83.7  | 64.7  | 6.9                                                             | 5.8   | 4.5   |
|                 |              |                                | Homodimer             | 75.5                                                | 61.7  | 49.3  | 3.5                                                             | 2.8   | 2.3   |
| P0A6Y8          | DnaK         | Cytoplasm. Cell inner membrane | Monomer               | 80.9                                                | 68.3  | 52.8  | 4.2                                                             | 3.5   | 2.7   |
| P0A988          | DnaN         | Cytoplasm                      | Monomer               | 99.6                                                | 84.2  | 65.0  | 6.9                                                             | 5.9   | 4.5   |
|                 |              |                                | Homodimer             | 75.9                                                | 62.0  | 49.5  | 3.5                                                             | 2.9   | 2.3   |
| P03007          | DnaQ         |                                | Monomer               | 116.7                                               | 98.6  | 76.2  | 10.1                                                            | 8.5   | 6.6   |
| P0A8J2          | DnaT         |                                | Monomer               | 132.9                                               | 112.3 | 86.7  | 13.4                                                            | 11.4  | 8.8   |
| P06710          | DnaX         |                                | Monomer               | 79.9                                                | 67.5  | 52.2  | 4.0                                                             | 3.4   | 2.6   |
| P0AA89          | DosC         |                                | Monomer               | 89.6                                                | 75.7  | 58.5  | 5.4                                                             | 4.5   | 3.5   |
| P76129          | DosP         |                                | Monomer               | 72.8                                                | 61.5  | 47.5  | 3.2                                                             | 2.7   | 2.1   |
|                 |              |                                | Homodimer             | 55.5                                                | 45.3  | 36.2  | 1.5                                                             | 1.2   | 1.0   |
| P0AEF4          | DpiA         | Cytoplasm                      | Monomer               | 119.6                                               | 101.1 | 78.1  | 10.6                                                            | 9.0   | 6.9   |
| P77510          | DpiB         | Cell inner membrane            | Monomer               | 84.5                                                | 71.4  | 55.2  | 4.6                                                             | 3.9   | 3.0   |
|                 |              |                                | Complex with SecB     | 63.0                                                | 51.4  | 41.1  | 2.1                                                             | 1.8   | 1.4   |
|                 |              |                                | Complex with TF (Tig) | 67.4                                                | 57.0  | 44.0  | 2.6                                                             | 2.2   | 1.7   |
| P23847          | DppA         | Periplasm                      | Monomer               | 85.3                                                | 72.1  | 55.7  | 4.8                                                             | 4.0   | 3.1   |
|                 |              |                                | Complex with SecB     | 63.2                                                | 51.7  | 41.3  | 2.2                                                             | 1.8   | 1.4   |
|                 |              |                                | Complex with TF (Tig) | 67.8                                                | 57.2  | 44.2  | 2.6                                                             | 2.2   | 1.7   |
| P0AEF8          | DppB         | Cell inner membrane            | Monomer               | 102.8                                               | 86.8  | 67.1  | 7.5                                                             | 6.3   | 4.9   |

| UniProtKB A. N. | Protein name | Subcellular location | Subunit               | $D_0 \left( \frac{\mu\text{m}^2}{\text{s}} \right)$ |       |       | $D_{\text{cyto}} \left( \frac{\mu\text{m}^2}{\text{s}} \right)$ |       |       |
|-----------------|--------------|----------------------|-----------------------|-----------------------------------------------------|-------|-------|-----------------------------------------------------------------|-------|-------|
|                 |              |                      |                       | 310 K                                               | 303 K | 293 K | 310 K                                                           | 303 K | 293 K |
|                 |              |                      | Complex with SecB     | 68.2                                                | 55.7  | 44.5  | 2.7                                                             | 2.2   | 1.7   |
|                 |              |                      | Complex with TF (Tig) | 74.3                                                | 62.8  | 48.5  | 3.3                                                             | 2.8   | 2.2   |
| P0AEG1          | DppC         | Cell inner membrane  | Monomer               | 108.9                                               | 92.0  | 71.1  | 8.6                                                             | 7.2   | 5.6   |
|                 |              |                      | Complex with SecB     | 69.6                                                | 56.8  | 45.4  | 2.8                                                             | 2.3   | 1.8   |
|                 |              |                      | Complex with TF (Tig) | 76.2                                                | 64.3  | 49.7  | 3.6                                                             | 3.0   | 2.3   |
| P0AAG0          | DppD         | Cell inner membrane  | Monomer               | 104.6                                               | 88.4  | 68.3  | 7.8                                                             | 6.6   | 5.1   |
|                 |              |                      | Complex with SecB     | 68.6                                                | 56.1  | 44.8  | 2.7                                                             | 2.2   | 1.8   |
|                 |              |                      | Complex with TF (Tig) | 74.9                                                | 63.3  | 48.9  | 3.4                                                             | 2.9   | 2.2   |
| P37313          | DppF         | Cell inner membrane  | Monomer               | 102.7                                               | 86.8  | 67.0  | 7.5                                                             | 6.3   | 4.9   |
|                 |              |                      | Complex with SecB     | 68.2                                                | 55.7  | 44.5  | 2.7                                                             | 2.2   | 1.7   |
|                 |              |                      | Complex with TF (Tig) | 74.3                                                | 62.8  | 48.5  | 3.3                                                             | 2.8   | 2.2   |
| P0ABT2          | Dps          | Cytoplasm > nucleoid | Monomer               | 135.0                                               | 114.0 | 88.1  | 13.9                                                            | 11.8  | 9.1   |
|                 |              |                      | Homododecamer         | 51.0                                                | 41.6  | 33.3  | 1.2                                                             | 1.0   | 0.8   |
| P0AEG4          | DsbA         | Periplasm            | Monomer               | 124.2                                               | 105.0 | 81.1  | 11.6                                                            | 9.8   | 7.6   |
|                 |              |                      | Complex with SecB     | 72.2                                                | 59.0  | 47.1  | 3.1                                                             | 2.5   | 2.0   |
|                 |              |                      | Complex with TF (Tig) | 79.9                                                | 67.5  | 52.1  | 4.0                                                             | 3.4   | 2.6   |
| P0A6M2          | DsbB         | Cell inner membrane  | Monomer               | 131.1                                               | 110.8 | 85.6  | 13.0                                                            | 11.0  | 8.5   |
|                 |              |                      | Complex with SecB     | 73.1                                                | 59.8  | 47.7  | 3.2                                                             | 2.6   | 2.1   |
|                 |              |                      | Complex with TF (Tig) | 81.2                                                | 68.6  | 53.0  | 4.2                                                             | 3.5   | 2.7   |
| P0AEG6          | DsbC         | Periplasm            | Monomer               | 119.3                                               | 100.8 | 77.9  | 10.6                                                            | 8.9   | 6.9   |
|                 |              |                      | Complex with SecB     | 71.5                                                | 58.4  | 46.6  | 3.0                                                             | 2.5   | 2.0   |
|                 |              |                      | Complex with TF (Tig) | 78.8                                                | 66.6  | 51.4  | 3.9                                                             | 3.3   | 2.5   |
| P36655          | DsbD         | Cell inner membrane  | Monomer               | 84.5                                                | 71.4  | 55.1  | 4.6                                                             | 3.9   | 3.0   |
|                 |              |                      | Complex with SecB     | 62.9                                                | 51.4  | 41.1  | 2.1                                                             | 1.7   | 1.4   |
|                 |              |                      | Complex with TF (Tig) | 67.4                                                | 56.9  | 44.0  | 2.6                                                             | 2.2   | 1.7   |
| P0AA86          | DsbE         | Cell inner membrane  | Monomer               | 129.4                                               | 109.4 | 84.5  | 12.7                                                            | 10.7  | 8.3   |
|                 |              |                      | Complex with SecB     | 72.9                                                | 59.6  | 47.6  | 3.2                                                             | 2.6   | 2.1   |
|                 |              |                      | Complex with TF (Tig) | 80.9                                                | 68.4  | 52.8  | 4.2                                                             | 3.5   | 2.7   |
| P77202          | DsbG         | Periplasm            | Monomer               | 116.1                                               | 98.0  | 75.7  | 9.9                                                             | 8.4   | 6.5   |
|                 |              |                      | Complex with SecB     | 70.9                                                | 57.9  | 46.3  | 3.0                                                             | 2.4   | 1.9   |
|                 |              |                      | Complex with TF (Tig) | 78.0                                                | 65.9  | 50.9  | 3.8                                                             | 3.2   | 2.5   |

| UniProtKB A. N. | Protein name | Subcellular location | Subunit               | $D_0 \left( \frac{\mu\text{m}^2}{\text{s}} \right)$ |       |       | $D_{\text{cyto}} \left( \frac{\mu\text{m}^2}{\text{s}} \right)$ |       |       |
|-----------------|--------------|----------------------|-----------------------|-----------------------------------------------------|-------|-------|-----------------------------------------------------------------|-------|-------|
|                 |              |                      |                       | 310 K                                               | 303 K | 293 K | 310 K                                                           | 303 K | 293 K |
| P00926          | DsdA         |                      | Monomer               | 93.4                                                | 78.9  | 60.9  | 5.9                                                             | 5.0   | 3.9   |
| P46068          | DsdC         |                      | Monomer               | 105.2                                               | 88.9  | 68.6  | 7.9                                                             | 6.7   | 5.2   |
| P08555          | DsdX         | Cell inner membrane  | Monomer               | 93.9                                                | 79.3  | 61.3  | 6.0                                                             | 5.1   | 3.9   |
|                 |              |                      | Complex with SecB     | 65.9                                                | 53.9  | 43.0  | 2.4                                                             | 2.0   | 1.6   |
|                 |              |                      | Complex with TF (Tig) | 71.3                                                | 60.2  | 46.5  | 3.0                                                             | 2.5   | 2.0   |
| P0AEG8          | DsrB         |                      | Monomer               | 199.0                                               | 168.1 | 129.9 | 31.2                                                            | 26.3  | 20.3  |
| P0A6M4          | Dtd          | Cytoplasm            | Monomer               | 143.7                                               | 121.4 | 93.7  | 15.9                                                            | 13.5  | 10.4  |
|                 |              |                      | Homodimer             | 109.5                                               | 89.4  | 71.4  | 8.7                                                             | 7.1   | 5.7   |
| P77304          | DtpA         | Cell inner membrane  | Monomer               | 89.1                                                | 75.3  | 58.1  | 5.3                                                             | 4.5   | 3.5   |
|                 |              |                      | Complex with SecB     | 64.5                                                | 52.7  | 42.1  | 2.3                                                             | 1.9   | 1.5   |
|                 |              |                      | Complex with TF (Tig) | 69.4                                                | 58.6  | 45.3  | 2.8                                                             | 2.4   | 1.8   |
| P36837          | DtpB         | Cell inner membrane  | Monomer               | 89.3                                                | 75.5  | 58.3  | 5.3                                                             | 4.5   | 3.5   |
|                 |              |                      | Complex with SecB     | 64.6                                                | 52.7  | 42.1  | 2.3                                                             | 1.9   | 1.5   |
|                 |              |                      | Complex with TF (Tig) | 69.5                                                | 58.7  | 45.3  | 2.8                                                             | 2.4   | 1.8   |
| P75742          | DtpD         | Cell inner membrane  | Monomer               | 89.0                                                | 75.2  | 58.1  | 5.3                                                             | 4.5   | 3.4   |
|                 |              |                      | Complex with SecB     | 64.4                                                | 52.7  | 42.1  | 2.3                                                             | 1.9   | 1.5   |
|                 |              |                      | Complex with TF (Tig) | 69.3                                                | 58.6  | 45.2  | 2.8                                                             | 2.3   | 1.8   |
| P32695          | DusA         |                      | Monomer               | 103.5                                               | 87.4  | 67.5  | 7.6                                                             | 6.4   | 5.0   |
| P0ABT5          | DusB         |                      | Monomer               | 104.6                                               | 88.3  | 68.2  | 7.8                                                             | 6.6   | 5.1   |
| P33371          | DusC         |                      | Monomer               | 105.3                                               | 89.0  | 68.7  | 7.9                                                             | 6.7   | 5.2   |
| P06968          | Dut          |                      | Monomer               | 142.9                                               | 120.8 | 93.3  | 15.8                                                            | 13.3  | 10.3  |
|                 |              |                      | Homotrimer            | 92.9                                                | 75.9  | 60.6  | 5.9                                                             | 4.8   | 3.8   |
| P45568          | Dxr          |                      | Monomer               | 97.0                                                | 82.0  | 63.3  | 6.5                                                             | 5.5   | 4.3   |
|                 |              |                      | Homodimer             | 74.0                                                | 60.4  | 48.3  | 3.3                                                             | 2.7   | 2.2   |
| P77488          | Dxs          |                      | Monomer               | 81.6                                                | 68.9  | 53.2  | 4.2                                                             | 3.6   | 2.8   |
|                 |              |                      | Homodimer             | 62.2                                                | 50.8  | 40.6  | 2.1                                                             | 1.7   | 1.3   |
| P36943          | EaeH         |                      | Monomer               | 107.8                                               | 91.1  | 70.4  | 8.4                                                             | 7.1   | 5.5   |
| P31125          | EamA         | Cell inner membrane  | Monomer               | 108.9                                               | 92.0  | 71.1  | 8.6                                                             | 7.2   | 5.6   |
|                 |              |                      | Complex with SecB     | 69.6                                                | 56.8  | 45.4  | 2.8                                                             | 2.3   | 1.8   |
|                 |              |                      | Complex with TF (Tig) | 76.2                                                | 64.3  | 49.7  | 3.6                                                             | 3.0   | 2.3   |
| P38101          | EamB         | Cell inner membrane  | Monomer               | 128.4                                               | 108.5 | 83.8  | 12.5                                                            | 10.5  | 8.1   |

| UniProtKB A. N. | Protein name | Subcellular location | Subunit                                               | $D_0 \left( \frac{\mu\text{m}^2}{\text{s}} \right)$ |       |       | $D_{\text{cyto}} \left( \frac{\mu\text{m}^2}{\text{s}} \right)$ |       |       |
|-----------------|--------------|----------------------|-------------------------------------------------------|-----------------------------------------------------|-------|-------|-----------------------------------------------------------------|-------|-------|
|                 |              |                      |                                                       | 310 K                                               | 303 K | 293 K | 310 K                                                           | 303 K | 293 K |
|                 |              |                      | Complex with SecB                                     | 72.8                                                | 59.5  | 47.5  | 3.2                                                             | 2.6   | 2.1   |
|                 |              |                      | Complex with TF (Tig)                                 | 80.7                                                | 68.2  | 52.7  | 4.1                                                             | 3.5   | 2.7   |
| P06864          | EbgA         |                      | Monomer                                               | 65.6                                                | 55.4  | 42.8  | 2.4                                                             | 2.0   | 1.6   |
|                 |              |                      | Heterooctamer (EbgA <sub>4</sub> –EbgC <sub>4</sub> ) | 36.1                                                | 30.5  | 23.5  | 0.4                                                             | 0.3   | 0.3   |
| P0AC73          | EbgC         |                      | Monomer                                               | 138.7                                               | 117.2 | 90.5  | 14.8                                                            | 12.5  | 9.6   |
|                 |              |                      | Heterooctamer (EbgA <sub>4</sub> –EbgC <sub>4</sub> ) | 36.1                                                | 30.5  | 23.5  | 0.4                                                             | 0.3   | 0.3   |
| P06846          | EbgR         |                      | Monomer                                               | 104.2                                               | 88.0  | 68.0  | 7.7                                                             | 6.5   | 5.0   |
|                 |              |                      | Monomer                                               | 238.9                                               | 201.8 | 155.9 | 44.3                                                            | 37.4  | 28.9  |
| P0ADB4          | EcnA         | Cell membrane        | Complex with SecB                                     | 78.9                                                | 64.5  | 51.5  | 3.9                                                             | 3.2   | 2.5   |
|                 |              |                      | Complex with TF (Tig)                                 | 90.0                                                | 76.1  | 58.7  | 5.4                                                             | 4.6   | 3.5   |
|                 |              |                      | Monomer                                               | 229.8                                               | 194.2 | 150.0 | 41.2                                                            | 34.8  | 26.9  |
| P0ADB7          | EcnB         | Cell membrane        | Complex with SecB                                     | 78.8                                                | 64.3  | 51.4  | 3.9                                                             | 3.2   | 2.5   |
|                 |              |                      | Complex with TF (Tig)                                 | 89.7                                                | 75.8  | 58.5  | 5.4                                                             | 4.6   | 3.5   |
|                 |              |                      | Monomer                                               | 136.4                                               | 115.3 | 89.0  | 14.2                                                            | 12.0  | 9.3   |
| P23827          | Eco          | Periplasm            | Complex with SecB                                     | 73.8                                                | 60.3  | 48.1  | 3.3                                                             | 2.7   | 2.1   |
|                 |              |                      | Complex with TF (Tig)                                 | 82.1                                                | 69.4  | 53.6  | 4.3                                                             | 3.7   | 2.8   |
|                 |              |                      | Monomer                                               | 116.8                                               | 98.7  | 76.2  | 10.1                                                            | 8.5   | 6.6   |
| P33128          | EcpD         | Periplasm            | Complex with SecB                                     | 71.0                                                | 58.0  | 46.4  | 3.0                                                             | 2.4   | 1.9   |
|                 |              |                      | Complex with TF (Tig)                                 | 78.2                                                | 66.1  | 51.0  | 3.8                                                             | 3.2   | 2.5   |
|                 |              |                      | Monomer                                               | 126.0                                               | 106.5 | 82.2  | 12.0                                                            | 10.1  | 7.8   |
| P0A955          | Eda          | Cytoplasm            | Homotrimer                                            | 81.9                                                | 66.9  | 53.5  | 4.3                                                             | 3.5   | 2.8   |
| P0ADF6          | Edd          |                      | Monomer                                               | 83.0                                                | 70.1  | 54.2  | 4.4                                                             | 3.7   | 2.9   |
|                 |              |                      | Monomer                                               | 111.7                                               | 94.4  | 72.9  | 9.1                                                             | 7.7   | 5.9   |
| P75901          | EfeU         | Cell inner membrane  | Complex with SecB                                     | 70.1                                                | 57.3  | 45.8  | 2.9                                                             | 2.3   | 1.9   |
|                 |              |                      | Complex with TF (Tig)                                 | 76.9                                                | 65.0  | 50.2  | 3.7                                                             | 3.1   | 2.4   |
| P0A6N4          | Efp          | Cytoplasm            | Monomer                                               | 130.0                                               | 109.8 | 84.8  | 12.8                                                            | 10.8  | 8.4   |
| P0AEH3          | ElaA         |                      | Monomer                                               | 138.8                                               | 117.2 | 90.6  | 14.8                                                            | 12.5  | 9.6   |
| P0AEH5          | ElaB         |                      | Monomer                                               | 164.4                                               | 138.9 | 107.3 | 21.2                                                            | 17.9  | 13.8  |
| Q47013          | ElaD         |                      | Monomer                                               | 94.8                                                | 80.1  | 61.9  | 6.2                                                             | 5.2   | 4.0   |
| P0ABU5          | ElbB         |                      | Monomer                                               | 124.5                                               | 105.2 | 81.2  | 11.6                                                            | 9.8   | 7.6   |
|                 |              |                      | Monomer                                               | 97.6                                                | 82.5  | 63.7  | 6.6                                                             | 5.6   | 4.3   |
| P27303          | EmrA         | Cell inner membrane  |                                                       |                                                     |       |       |                                                                 |       |       |

| UniProtKB A. N. | Protein name | Subcellular location                           | Subunit               | $D_0 \left( \frac{\mu\text{m}^2}{\text{s}} \right)$ |       |       | $D_{\text{cyto}} \left( \frac{\mu\text{m}^2}{\text{s}} \right)$ |       |       |
|-----------------|--------------|------------------------------------------------|-----------------------|-----------------------------------------------------|-------|-------|-----------------------------------------------------------------|-------|-------|
|                 |              |                                                |                       | 310 K                                               | 303 K | 293 K | 310 K                                                           | 303 K | 293 K |
|                 |              |                                                | Complex with SecB     | 67.0                                                | 54.7  | 43.7  | 2.5                                                             | 2.1   | 1.7   |
|                 |              |                                                | Complex with TF (Tig) | 72.6                                                | 61.3  | 47.4  | 3.1                                                             | 2.7   | 2.1   |
| P0AEJ0          | EmrB         | Cell inner membrane                            | Monomer               | 88.0                                                | 74.4  | 57.5  | 5.1                                                             | 4.3   | 3.4   |
|                 |              |                                                | Complex with SecB     | 64.2                                                | 52.4  | 41.9  | 2.3                                                             | 1.8   | 1.5   |
|                 |              |                                                | Complex with TF (Tig) | 68.9                                                | 58.2  | 45.0  | 2.7                                                             | 2.3   | 1.8   |
| P31442          | EmrD         | Cell inner membrane                            | Monomer               | 98.1                                                | 82.9  | 64.0  | 6.7                                                             | 5.7   | 4.4   |
|                 |              |                                                | Complex with SecB     | 67.1                                                | 54.8  | 43.8  | 2.5                                                             | 2.1   | 1.7   |
|                 |              |                                                | Complex with TF (Tig) | 72.8                                                | 61.5  | 47.5  | 3.2                                                             | 2.7   | 2.1   |
| P23895          | EmrE         | Cell inner membrane                            | Monomer               | 160.8                                               | 135.9 | 105.0 | 20.2                                                            | 17.1  | 13.2  |
|                 |              |                                                | Complex with SecB     | 76.0                                                | 62.1  | 49.6  | 3.5                                                             | 2.9   | 2.3   |
|                 |              |                                                | Complex with TF (Tig) | 85.4                                                | 72.1  | 55.7  | 4.8                                                             | 4.0   | 3.1   |
| P52599          | EmrK         | Cell inner membrane                            | Monomer               | 97.8                                                | 82.6  | 63.8  | 6.6                                                             | 5.6   | 4.3   |
|                 |              |                                                | Complex with SecB     | 67.0                                                | 54.7  | 43.7  | 2.5                                                             | 2.1   | 1.7   |
|                 |              |                                                | Complex with TF (Tig) | 72.7                                                | 61.4  | 47.4  | 3.1                                                             | 2.7   | 2.1   |
| P52600          | EmrY         | Cell inner membrane                            | Monomer               | 87.8                                                | 74.2  | 57.3  | 5.1                                                             | 4.3   | 3.3   |
|                 |              |                                                | Complex with SecB     | 64.1                                                | 52.3  | 41.8  | 2.2                                                             | 1.8   | 1.5   |
|                 |              |                                                | Complex with TF (Tig) | 68.8                                                | 58.2  | 44.9  | 2.7                                                             | 2.3   | 1.8   |
| P0C960          | EmtA         | Cell outer membrane                            | Monomer               | 126.1                                               | 106.6 | 82.3  | 12.0                                                            | 10.1  | 7.8   |
|                 |              |                                                | Complex with SecB     | 72.5                                                | 59.2  | 47.3  | 3.1                                                             | 2.6   | 2.0   |
|                 |              |                                                | Complex with TF (Tig) | 80.3                                                | 67.8  | 52.4  | 4.1                                                             | 3.4   | 2.7   |
| P25736          | EndA         | Periplasm                                      | Monomer               | 117.4                                               | 99.2  | 76.6  | 10.2                                                            | 8.6   | 6.6   |
|                 |              |                                                | Complex with SecB     | 71.1                                                | 58.1  | 46.4  | 3.0                                                             | 2.4   | 1.9   |
|                 |              |                                                | Complex with TF (Tig) | 78.3                                                | 66.2  | 51.1  | 3.8                                                             | 3.2   | 2.5   |
| P0A6P7          | EngB         |                                                | Monomer               | 123.3                                               | 104.2 | 80.5  | 11.4                                                            | 9.6   | 7.4   |
| P0ABU2          | EngD         |                                                | Monomer               | 100.5                                               | 84.9  | 65.6  | 7.1                                                             | 6.0   | 4.6   |
| P0A6P9          | Eno          | Cytoplasm > cytoskeleton Secreted Cell surface | Monomer               | 95.1                                                | 80.4  | 62.1  | 6.2                                                             | 5.3   | 4.1   |
|                 |              |                                                | Homodimer             | 72.5                                                | 59.2  | 47.3  | 3.1                                                             | 2.6   | 2.0   |
| P15047          | EntA         |                                                | Monomer               | 118.2                                               | 99.8  | 77.1  | 10.3                                                            | 8.7   | 6.7   |
|                 |              |                                                | Homooctamer           | 52.3                                                | 42.7  | 34.1  | 1.3                                                             | 1.0   | 0.8   |
| P0ADI4          | EntB         |                                                | Monomer               | 108.6                                               | 91.8  | 70.9  | 8.5                                                             | 7.2   | 5.6   |
| P0AEJ2          | EntC         |                                                | Monomer               | 97.5                                                | 82.3  | 63.6  | 6.6                                                             | 5.6   | 4.3   |

| UniProtKB A. N. | Protein name | Subcellular location           | Subunit               | $D_0 \left( \frac{\mu\text{m}^2}{\text{s}} \right)$ |       |       | $D_{\text{cyto}} \left( \frac{\mu\text{m}^2}{\text{s}} \right)$ |       |       |
|-----------------|--------------|--------------------------------|-----------------------|-----------------------------------------------------|-------|-------|-----------------------------------------------------------------|-------|-------|
|                 |              |                                |                       | 310 K                                               | 303 K | 293 K | 310 K                                                           | 303 K | 293 K |
| P19925          | EntD         |                                | Monomer               | 123.2                                               | 104.1 | 80.4  | 11.4                                                            | 9.6   | 7.4   |
| P10378          | EntE         |                                | Monomer               | 86.0                                                | 72.6  | 56.1  | 4.8                                                             | 4.1   | 3.2   |
| P11454          | EntF         |                                | Monomer               | 61.0                                                | 51.5  | 39.8  | 2.0                                                             | 1.7   | 1.3   |
| P24077          | EntS         | Cell inner membrane            | Monomer               | 97.1                                                | 82.1  | 63.4  | 6.5                                                             | 5.5   | 4.3   |
|                 |              |                                | Complex with SecB     | 66.8                                                | 54.6  | 43.6  | 2.5                                                             | 2.1   | 1.6   |
|                 |              |                                | Complex with TF (Tig) | 72.4                                                | 61.2  | 47.3  | 3.1                                                             | 2.6   | 2.0   |
| P37690          | EnvC         | Periplasm                      | Monomer               | 94.4                                                | 79.7  | 61.6  | 6.1                                                             | 5.2   | 4.0   |
|                 |              |                                | Complex with SecB     | 66.1                                                | 54.0  | 43.1  | 2.4                                                             | 2.0   | 1.6   |
|                 |              |                                | Complex with TF (Tig) | 71.4                                                | 60.4  | 46.6  | 3.0                                                             | 2.5   | 2.0   |
| P0ACT2          | EnvR         |                                | Monomer               | 120.1                                               | 101.5 | 78.4  | 10.7                                                            | 9.1   | 7.0   |
| P10805          | EnvY         |                                | Monomer               | 113.6                                               | 96.0  | 74.1  | 9.5                                                             | 8.0   | 6.2   |
| P0AEJ4          | EnvZ         | Cell inner membrane            | Monomer               | 91.6                                                | 77.4  | 59.7  | 5.7                                                             | 4.8   | 3.7   |
|                 |              |                                | Complex with SecB     | 65.3                                                | 53.3  | 42.6  | 2.4                                                             | 1.9   | 1.5   |
|                 |              |                                | Complex with TF (Tig) | 70.4                                                | 59.4  | 45.9  | 2.9                                                             | 2.4   | 1.9   |
| P0A9B6          | Epd          | Cytoplasm                      | Monomer               | 103.0                                               | 87.0  | 67.2  | 7.5                                                             | 6.3   | 4.9   |
|                 |              |                                | Homotetramer          | 59.8                                                | 48.9  | 39.0  | 1.9                                                             | 1.5   | 1.2   |
| P30845          | EptA         | Cell inner membrane            | Monomer               | 84.6                                                | 71.4  | 55.2  | 4.6                                                             | 3.9   | 3.0   |
|                 |              |                                | Complex with SecB     | 63.0                                                | 51.4  | 41.1  | 2.1                                                             | 1.8   | 1.4   |
|                 |              |                                | Complex with TF (Tig) | 67.4                                                | 57.0  | 44.0  | 2.6                                                             | 2.2   | 1.7   |
| P37661          | EptB         | Cell inner membrane            | Monomer               | 83.4                                                | 70.5  | 54.4  | 4.5                                                             | 3.8   | 2.9   |
|                 |              |                                | Complex with SecB     | 62.6                                                | 51.1  | 40.8  | 2.1                                                             | 1.7   | 1.4   |
|                 |              |                                | Complex with TF (Tig) | 66.9                                                | 56.5  | 43.7  | 2.5                                                             | 2.1   | 1.7   |
| P06616          | Era          | Cytoplasm. Cell inner membrane | Monomer               | 107.0                                               | 90.4  | 69.8  | 8.2                                                             | 6.9   | 5.4   |
| P39176          | ErfK         | Periplasm                      | Monomer               | 106.3                                               | 89.8  | 69.4  | 8.1                                                             | 6.8   | 5.3   |
|                 |              |                                | Complex with SecB     | 69.0                                                | 56.4  | 45.0  | 2.7                                                             | 2.2   | 1.8   |
|                 |              |                                | Complex with TF (Tig) | 75.4                                                | 63.7  | 49.2  | 3.5                                                             | 2.9   | 2.3   |
| P0ACC3          | ErpA         |                                | Monomer               | 160.1                                               | 135.3 | 104.5 | 20.0                                                            | 16.9  | 13.1  |
|                 |              |                                | Homodimer             | 122.0                                               | 99.7  | 79.6  | 11.1                                                            | 9.1   | 7.3   |
| P0A9R2          | EssD         |                                | Monomer               | 190.4                                               | 160.8 | 124.2 | 28.5                                                            | 24.1  | 18.6  |
| P77237          | EssQ         |                                | Monomer               | 190.7                                               | 161.1 | 124.5 | 28.6                                                            | 24.2  | 18.7  |

| UniProtKB A. N. | Protein name | Subcellular location | Subunit                 | $D_0 \left( \frac{\mu\text{m}^2}{\text{s}} \right)$ |       |       | $D_{\text{cyto}} \left( \frac{\mu\text{m}^2}{\text{s}} \right)$ |       |       |
|-----------------|--------------|----------------------|-------------------------|-----------------------------------------------------|-------|-------|-----------------------------------------------------------------|-------|-------|
|                 |              |                      |                         | 310 K                                               | 303 K | 293 K | 310 K                                                           | 303 K | 293 K |
| P38134          | Etk          | Cell inner membrane  | Monomer                 | 75.9                                                | 64.1  | 49.5  | 3.5                                                             | 3.0   | 2.3   |
|                 |              |                      | Complex with SecB       | 59.6                                                | 48.7  | 38.9  | 1.8                                                             | 1.5   | 1.2   |
|                 |              |                      | Complex with TF (Tig)   | 63.2                                                | 53.4  | 41.3  | 2.2                                                             | 1.8   | 1.4   |
| P0ACZ2          | Etp          |                      | Monomer                 | 142.2                                               | 120.1 | 92.8  | 15.6                                                            | 13.2  | 10.2  |
| P76551          | EutA         |                      | Monomer                 | 92.1                                                | 77.8  | 60.1  | 5.7                                                             | 4.9   | 3.7   |
| P0AEJ6          | EutB         |                      | Monomer                 | 92.2                                                | 77.9  | 60.2  | 5.8                                                             | 4.9   | 3.8   |
|                 |              |                      | Heterodimer (EutB–EutC) | 75.9                                                | 64.1  | 49.5  | 3.5                                                             | 3.0   | 2.3   |
| P19636          | EutC         |                      | Monomer                 | 109.6                                               | 92.6  | 71.5  | 8.7                                                             | 7.4   | 5.7   |
|                 |              |                      | Heterodimer (EutB–EutC) | 75.9                                                | 64.1  | 49.5  | 3.5                                                             | 3.0   | 2.3   |
| P77218          | EutD         |                      | Monomer                 | 104.3                                               | 88.1  | 68.1  | 7.8                                                             | 6.5   | 5.1   |
| P77445          | EutE         |                      | Monomer                 | 92.5                                                | 78.2  | 60.4  | 5.8                                                             | 4.9   | 3.8   |
| P76553          | EutG         |                      | Monomer                 | 99.2                                                | 83.8  | 64.7  | 6.9                                                             | 5.8   | 4.5   |
| P76552          | EutH         | Cell inner membrane  | Monomer                 | 97.6                                                | 82.4  | 63.7  | 6.6                                                             | 5.6   | 4.3   |
|                 |              |                      | Complex with SecB       | 66.9                                                | 54.7  | 43.7  | 2.5                                                             | 2.1   | 1.7   |
|                 |              |                      | Complex with TF (Tig)   | 72.6                                                | 61.3  | 47.4  | 3.1                                                             | 2.7   | 2.0   |
| P77277          | EutJ         |                      | Monomer                 | 112.0                                               | 94.6  | 73.1  | 9.2                                                             | 7.7   | 6.0   |
| P76540          | EutK         |                      | Monomer                 | 137.3                                               | 116.0 | 89.6  | 14.4                                                            | 12.2  | 9.4   |
| P76541          | EutL         |                      | Monomer                 | 124.9                                               | 105.5 | 81.5  | 11.7                                                            | 9.9   | 7.6   |
| P0ABF4          | EutM         |                      | Monomer                 | 173.4                                               | 146.5 | 113.2 | 23.6                                                            | 20.0  | 15.4  |
| P0AEJ8          | EutN         |                      | Monomer                 | 172.8                                               | 146.0 | 112.8 | 23.5                                                            | 19.8  | 15.3  |
| P76556          | EutP         |                      | Monomer                 | 138.0                                               | 116.6 | 90.1  | 14.6                                                            | 12.3  | 9.5   |
| P76555          | EutQ         |                      | Monomer                 | 119.7                                               | 101.1 | 78.1  | 10.6                                                            | 9.0   | 6.9   |
| P36547          | EutR         |                      | Monomer                 | 100.0                                               | 84.5  | 65.3  | 7.0                                                             | 5.9   | 4.6   |
| P63746          | EutS         |                      | Monomer                 | 162.5                                               | 137.3 | 106.0 | 20.7                                                            | 17.5  | 13.5  |
| P65643          | EutT         |                      | Monomer                 | 111.9                                               | 94.5  | 73.0  | 9.1                                                             | 7.7   | 6.0   |
| P0ACZ4          | EvgA         | Cytoplasm            | Monomer                 | 125.1                                               | 105.7 | 81.7  | 11.8                                                            | 9.9   | 7.7   |
|                 |              |                      | Homodimer               | 95.4                                                | 77.9  | 62.2  | 6.3                                                             | 5.1   | 4.1   |
| P30855          | EvgS         | Cell inner membrane  | Monomer                 | 62.2                                                | 52.6  | 40.6  | 2.1                                                             | 1.8   | 1.4   |
|                 |              |                      | Complex with SecB       | 52.9                                                | 43.2  | 34.5  | 1.3                                                             | 1.1   | 0.9   |
|                 |              |                      | Complex with TF (Tig)   | 55.2                                                | 46.6  | 36.0  | 1.5                                                             | 1.3   | 1.0   |
| P0ABU7          | ExbB         | Cell inner membrane  | Monomer                 | 118.1                                               | 99.8  | 77.1  | 10.3                                                            | 8.7   | 6.7   |



| UniProtKB A. N. | Protein name | Subcellular location | Subunit                                                | $D_0 \left( \frac{\mu\text{m}^2}{\text{s}} \right)$ |       |       | $D_{\text{cyto}} \left( \frac{\mu\text{m}^2}{\text{s}} \right)$ |       |       |
|-----------------|--------------|----------------------|--------------------------------------------------------|-----------------------------------------------------|-------|-------|-----------------------------------------------------------------|-------|-------|
|                 |              |                      |                                                        | 310 K                                               | 303 K | 293 K | 310 K                                                           | 303 K | 293 K |
|                 |              |                      | Complex with SecB                                      | 71.3                                                | 58.2  | 46.5  | 3.0                                                             | 2.4   | 2.0   |
|                 |              |                      | Complex with TF (Tig)                                  | 78.5                                                | 66.3  | 51.2  | 3.9                                                             | 3.3   | 2.5   |
| P0ABV2          | ExbD         | Cell inner membrane  | Monomer                                                | 145.2                                               | 122.7 | 94.7  | 16.3                                                            | 13.8  | 10.6  |
|                 |              |                      | Complex with SecB                                      | 74.7                                                | 61.0  | 48.7  | 3.4                                                             | 2.8   | 2.2   |
|                 |              |                      | Complex with TF (Tig)                                  | 83.5                                                | 70.5  | 54.5  | 4.5                                                             | 3.8   | 2.9   |
| P0AEK0          | ExoX         |                      | Monomer                                                | 120.2                                               | 101.6 | 78.4  | 10.7                                                            | 9.1   | 7.0   |
| P0ACL2          | ExuR         |                      | Monomer                                                | 112.4                                               | 95.0  | 73.3  | 9.2                                                             | 7.8   | 6.0   |
| P0AA78          | ExuT         | Cell inner membrane  | Monomer                                                | 90.7                                                | 76.6  | 59.2  | 5.5                                                             | 4.7   | 3.6   |
|                 |              |                      | Complex with SecB                                      | 65.0                                                | 53.1  | 42.4  | 2.3                                                             | 1.9   | 1.5   |
|                 |              |                      | Complex with TF (Tig)                                  | 70.0                                                | 59.2  | 45.7  | 2.9                                                             | 2.4   | 1.9   |
| P0A6Q3          | FabA         | Cytoplasm            | Monomer                                                | 134.2                                               | 113.4 | 87.6  | 13.7                                                            | 11.6  | 9.0   |
|                 |              |                      | Homodimer                                              | 102.3                                               | 83.6  | 66.7  | 7.4                                                             | 6.0   | 4.8   |
| P0A953          | FabB         | Cytoplasm            | Monomer                                                | 97.7                                                | 82.6  | 63.8  | 6.6                                                             | 5.6   | 4.3   |
|                 |              |                      | Homodimer                                              | 74.5                                                | 60.8  | 48.6  | 3.4                                                             | 2.7   | 2.2   |
| P0AAI9          | FabD         |                      | Monomer                                                | 108.8                                               | 91.9  | 71.0  | 8.5                                                             | 7.2   | 5.6   |
| P0AAI5          | FabF         |                      | Monomer                                                | 97.3                                                | 82.2  | 63.5  | 6.6                                                             | 5.6   | 4.3   |
|                 |              |                      | Homodimer                                              | 74.2                                                | 60.6  | 48.4  | 3.3                                                             | 2.7   | 2.2   |
| P0AEK2          | FabG         |                      | Monomer                                                | 119.4                                               | 100.9 | 77.9  | 10.6                                                            | 8.9   | 6.9   |
|                 |              |                      | Homotetramer                                           | 69.4                                                | 56.7  | 45.3  | 2.8                                                             | 2.3   | 1.8   |
| P0A6R0          | FabH         | Cytoplasm            | Monomer                                                | 107.4                                               | 90.7  | 70.1  | 8.3                                                             | 7.0   | 5.4   |
|                 |              |                      | Homodimer                                              | 81.8                                                | 66.9  | 53.4  | 4.3                                                             | 3.5   | 2.8   |
| P0AEK4          | FabI         |                      | Monomer                                                | 115.4                                               | 97.5  | 75.3  | 9.8                                                             | 8.3   | 6.4   |
|                 |              |                      | Homotetramer                                           | 67.0                                                | 54.8  | 43.8  | 2.5                                                             | 2.1   | 1.7   |
| P0ACU5          | FabR         | Cytoplasm            | Monomer                                                | 121.6                                               | 102.7 | 79.4  | 11.0                                                            | 9.3   | 7.2   |
|                 |              |                      | Homodimer                                              | 92.7                                                | 75.7  | 60.5  | 5.8                                                             | 4.8   | 3.8   |
| P0A6Q6          | FabZ         | Cytoplasm            | Monomer                                                | 140.0                                               | 118.3 | 91.4  | 15.1                                                            | 12.7  | 9.8   |
| P21151          | FadA         | Cytoplasm            | Monomer                                                | 99.3                                                | 83.9  | 64.8  | 6.9                                                             | 5.8   | 4.5   |
|                 |              |                      | Heterotetramer (FadA <sub>2</sub> –FadB <sub>2</sub> ) | 49.6                                                | 41.9  | 32.3  | 1.1                                                             | 0.9   | 0.7   |
| P21177          | FadB         |                      | Monomer                                                | 76.5                                                | 64.6  | 49.9  | 3.6                                                             | 3.0   | 2.4   |
|                 |              |                      | Heterotetramer (FadA <sub>2</sub> –FadB <sub>2</sub> ) | 49.6                                                | 41.9  | 32.3  | 1.1                                                             | 0.9   | 0.7   |
| P69451          | FadD         | Membrane             | Monomer                                                | 84.2                                                | 71.1  | 54.9  | 4.6                                                             | 3.9   | 3.0   |

| UniProtKB A. N. | Protein name | Subcellular location | Subunit                                                | $D_0 \left( \frac{\mu\text{m}^2}{\text{s}} \right)$ |       |       | $D_{\text{cyto}} \left( \frac{\mu\text{m}^2}{\text{s}} \right)$ |       |       |
|-----------------|--------------|----------------------|--------------------------------------------------------|-----------------------------------------------------|-------|-------|-----------------------------------------------------------------|-------|-------|
|                 |              |                      |                                                        | 310 K                                               | 303 K | 293 K | 310 K                                                           | 303 K | 293 K |
|                 |              |                      | Complex with SecB                                      | 62.8                                                | 51.3  | 41.0  | 2.1                                                             | 1.7   | 1.4   |
|                 |              |                      | Complex with TF (Tig)                                  | 67.3                                                | 56.8  | 43.9  | 2.6                                                             | 2.2   | 1.7   |
| Q47146          | FadE         |                      | Monomer                                                | 73.2                                                | 61.8  | 47.7  | 3.2                                                             | 2.7   | 2.1   |
| P42593          | FadH         |                      | Monomer                                                | 79.3                                                | 67.0  | 51.7  | 3.9                                                             | 3.3   | 2.6   |
| P76503          | FadI         | Cytoplasm            | Monomer                                                | 94.4                                                | 79.8  | 61.6  | 6.1                                                             | 5.2   | 4.0   |
|                 |              |                      | Heterotetramer (FadI <sub>2</sub> -FadJ <sub>2</sub> ) | 59.0                                                | 49.9  | 38.5  | 1.8                                                             | 1.5   | 1.2   |
| P77399          | FadJ         | Cytoplasm            | Monomer                                                | 77.5                                                | 65.5  | 50.6  | 3.7                                                             | 3.1   | 2.4   |
|                 |              |                      | Heterotetramer (FadI <sub>2</sub> -FadJ <sub>2</sub> ) | 59.0                                                | 49.9  | 38.5  | 1.8                                                             | 1.5   | 1.2   |
| P38135          | FadK         | Membrane             | Monomer                                                | 85.0                                                | 71.8  | 55.5  | 4.7                                                             | 4.0   | 3.1   |
|                 |              |                      | Complex with SecB                                      | 63.1                                                | 51.6  | 41.2  | 2.2                                                             | 1.8   | 1.4   |
|                 |              |                      | Complex with TF (Tig)                                  | 67.6                                                | 57.1  | 44.1  | 2.6                                                             | 2.2   | 1.7   |
| P10384          | FadL         | Cell outer membrane  | Monomer                                                | 92.9                                                | 78.5  | 60.6  | 5.9                                                             | 5.0   | 3.8   |
|                 |              |                      | Complex with SecB                                      | 65.6                                                | 53.6  | 42.8  | 2.4                                                             | 2.0   | 1.6   |
|                 |              |                      | Complex with TF (Tig)                                  | 70.9                                                | 59.9  | 46.2  | 2.9                                                             | 2.5   | 1.9   |
| P0A8V6          | FadR         | Cytoplasm            | Monomer                                                | 116.9                                               | 98.8  | 76.3  | 10.1                                                            | 8.5   | 6.6   |
|                 |              |                      | Homodimer                                              | 89.1                                                | 72.8  | 58.1  | 5.3                                                             | 4.3   | 3.5   |
| P0AB71          | FbaA         |                      | Monomer                                                | 101.0                                               | 85.4  | 65.9  | 7.2                                                             | 6.1   | 4.7   |
|                 |              |                      | Homodimer                                              | 77.0                                                | 62.9  | 50.2  | 3.7                                                             | 3.0   | 2.4   |
| P0A991          | FbaB         | Cytoplasm            | Monomer                                                | 102.1                                               | 86.3  | 66.6  | 7.4                                                             | 6.2   | 4.8   |
|                 |              |                      | Homooctamer                                            | 45.2                                                | 36.9  | 29.5  | 0.8                                                             | 0.7   | 0.5   |
|                 |              |                      | Homodecamer                                            | 41.4                                                | 35.0  | 27.0  | 0.6                                                             | 0.5   | 0.4   |
| P0A993          | Fbp          | Cytoplasm            | Monomer                                                | 103.5                                               | 87.4  | 67.5  | 7.6                                                             | 6.4   | 5.0   |
|                 |              |                      | Homotetramer                                           | 60.1                                                | 49.1  | 39.2  | 1.9                                                             | 1.5   | 1.2   |
| P75681          | FbpB         | Cell inner membrane  | Monomer                                                | 157.9                                               | 133.4 | 103.0 | 19.5                                                            | 16.4  | 12.7  |
|                 |              |                      | Complex with SecB                                      | 75.7                                                | 61.9  | 49.4  | 3.5                                                             | 2.9   | 2.3   |
|                 |              |                      | Complex with TF (Tig)                                  | 85.1                                                | 71.9  | 55.5  | 4.7                                                             | 4.0   | 3.1   |
| P37009          | FbpC         | Cell inner membrane  | Monomer                                                | 101.1                                               | 85.4  | 66.0  | 7.2                                                             | 6.1   | 4.7   |
|                 |              |                      | Complex with SecB                                      | 67.8                                                | 55.4  | 44.3  | 2.6                                                             | 2.1   | 1.7   |
|                 |              |                      | Complex with TF (Tig)                                  | 73.8                                                | 62.3  | 48.2  | 3.3                                                             | 2.8   | 2.1   |
| P32055          | Fcl          | Cytoplasm            | Monomer                                                | 104.3                                               | 88.1  | 68.0  | 7.7                                                             | 6.5   | 5.0   |
|                 |              |                      | Homodimer                                              | 79.4                                                | 64.9  | 51.8  | 4.0                                                             | 3.2   | 2.6   |

| UniProtKB A. N. | Protein name | Subcellular location | Subunit               | $D_0 \left( \frac{\mu\text{m}^2}{\text{s}} \right)$ |       |       | $D_{\text{cyto}} \left( \frac{\mu\text{m}^2}{\text{s}} \right)$ |       |       |
|-----------------|--------------|----------------------|-----------------------|-----------------------------------------------------|-------|-------|-----------------------------------------------------------------|-------|-------|
|                 |              |                      |                       | 310 K                                               | 303 K | 293 K | 310 K                                                           | 303 K | 293 K |
| P32177          | FdhD         | Cytoplasm            | Monomer               | 111.3                                               | 94.1  | 72.7  | 9.0                                                             | 7.6   | 5.9   |
| P13024          | FdhE         | Cytoplasm            | Monomer               | 105.9                                               | 89.4  | 69.1  | 8.0                                                             | 6.8   | 5.2   |
| P07658          | FdhF         |                      | Monomer               | 76.6                                                | 64.7  | 50.0  | 3.6                                                             | 3.1   | 2.4   |
| P24183          | FdnG         | Periplasm            | Monomer               | 66.7                                                | 56.3  | 43.5  | 2.5                                                             | 2.1   | 1.6   |
|                 |              |                      | Complex with SecB     | 55.3                                                | 45.2  | 36.1  | 1.5                                                             | 1.2   | 1.0   |
|                 |              |                      | Complex with TF (Tig) | 58.0                                                | 49.0  | 37.9  | 1.7                                                             | 1.4   | 1.1   |
| P0AAJ3          | FdnH         | Cell membrane        | Monomer               | 109.0                                               | 92.1  | 71.1  | 8.6                                                             | 7.3   | 5.6   |
|                 |              |                      | Complex with SecB     | 69.6                                                | 56.9  | 45.4  | 2.8                                                             | 2.3   | 1.8   |
|                 |              |                      | Complex with TF (Tig) | 76.2                                                | 64.4  | 49.7  | 3.6                                                             | 3.0   | 2.3   |
| P0AEK7          | FdnI         | Cell inner membrane  | Monomer               | 119.8                                               | 101.2 | 78.2  | 10.7                                                            | 9.0   | 7.0   |
|                 |              |                      | Complex with SecB     | 71.5                                                | 58.4  | 46.7  | 3.0                                                             | 2.5   | 2.0   |
|                 |              |                      | Complex with TF (Tig) | 78.9                                                | 66.7  | 51.5  | 3.9                                                             | 3.3   | 2.5   |
| P32176          | FdoG         | Periplasm            | Monomer               | 66.8                                                | 56.4  | 43.6  | 2.5                                                             | 2.1   | 1.6   |
|                 |              |                      | Complex with SecB     | 55.4                                                | 45.2  | 36.1  | 1.5                                                             | 1.2   | 1.0   |
|                 |              |                      | Complex with TF (Tig) | 58.1                                                | 49.1  | 37.9  | 1.7                                                             | 1.4   | 1.1   |
| P0AAJ5          | FdoH         | Cell membrane        | Monomer               | 107.9                                               | 91.2  | 70.4  | 8.4                                                             | 7.1   | 5.5   |
|                 |              |                      | Complex with SecB     | 69.4                                                | 56.7  | 45.3  | 2.8                                                             | 2.3   | 1.8   |
|                 |              |                      | Complex with TF (Tig) | 75.9                                                | 64.1  | 49.5  | 3.5                                                             | 3.0   | 2.3   |
| P0AEL0          | FdoI         | Cell inner membrane  | Monomer               | 121.2                                               | 102.4 | 79.1  | 11.0                                                            | 9.3   | 7.1   |
|                 |              |                      | Complex with SecB     | 71.8                                                | 58.6  | 46.8  | 3.0                                                             | 2.5   | 2.0   |
|                 |              |                      | Complex with TF (Tig) | 79.2                                                | 66.9  | 51.7  | 3.9                                                             | 3.3   | 2.6   |
| Q47208          | FdrA         | Cell membrane        | Monomer               | 86.3                                                | 72.9  | 56.3  | 4.9                                                             | 4.1   | 3.2   |
|                 |              |                      | Complex with SecB     | 63.6                                                | 51.9  | 41.5  | 2.2                                                             | 1.8   | 1.4   |
|                 |              |                      | Complex with TF (Tig) | 68.2                                                | 57.6  | 44.5  | 2.7                                                             | 2.2   | 1.7   |
| P0A9R4          | Fdx          |                      | Monomer               | 158.9                                               | 134.3 | 103.7 | 19.7                                                            | 16.7  | 12.9  |
| P80668          | FeaB         |                      | Monomer               | 89.3                                                | 75.4  | 58.3  | 5.3                                                             | 4.5   | 3.5   |
|                 |              |                      | Homodimer             | 68.0                                                | 55.6  | 44.4  | 2.6                                                             | 2.2   | 1.7   |
| Q47129          | FeaR         |                      | Monomer               | 106.0                                               | 89.6  | 69.2  | 8.0                                                             | 6.8   | 5.3   |
| P13036          | FecA         | Cell outer membrane  | Monomer               | 74.4                                                | 62.9  | 48.6  | 3.4                                                             | 2.8   | 2.2   |
|                 |              |                      | Complex with SecB     | 59.0                                                | 48.2  | 38.5  | 1.8                                                             | 1.5   | 1.2   |
|                 |              |                      | Complex with TF (Tig) | 62.5                                                | 52.8  | 40.8  | 2.1                                                             | 1.8   | 1.4   |

| UniProtKB A. N. | Protein name | Subcellular location | Subunit               | $D_0 \left( \frac{\mu\text{m}^2}{\text{s}} \right)$ |       |       | $D_{\text{cyto}} \left( \frac{\mu\text{m}^2}{\text{s}} \right)$ |       |       |
|-----------------|--------------|----------------------|-----------------------|-----------------------------------------------------|-------|-------|-----------------------------------------------------------------|-------|-------|
|                 |              |                      |                       | 310 K                                               | 303 K | 293 K | 310 K                                                           | 303 K | 293 K |
| P15028          | FecB         | Periplasm            | Monomer               | 107.9                                               | 91.1  | 70.4  | 8.4                                                             | 7.1   | 5.5   |
|                 |              |                      | Complex with SecB     | 69.3                                                | 56.7  | 45.3  | 2.8                                                             | 2.3   | 1.8   |
|                 |              |                      | Complex with TF (Tig) | 75.9                                                | 64.1  | 49.5  | 3.5                                                             | 3.0   | 2.3   |
| P15030          | FecC         | Cell inner membrane  | Monomer               | 105.7                                               | 89.3  | 69.0  | 8.0                                                             | 6.8   | 5.2   |
|                 |              |                      | Complex with SecB     | 68.9                                                | 56.3  | 45.0  | 2.7                                                             | 2.2   | 1.8   |
|                 |              |                      | Complex with TF (Tig) | 75.2                                                | 63.6  | 49.1  | 3.4                                                             | 2.9   | 2.2   |
| P15029          | FecD         | Cell inner membrane  | Monomer               | 106.6                                               | 90.1  | 69.6  | 8.2                                                             | 6.9   | 5.3   |
|                 |              |                      | Complex with SecB     | 69.1                                                | 56.4  | 45.1  | 2.8                                                             | 2.3   | 1.8   |
|                 |              |                      | Complex with TF (Tig) | 75.5                                                | 63.8  | 49.3  | 3.5                                                             | 2.9   | 2.3   |
| P15031          | FecE         | Cell inner membrane  | Monomer               | 114.9                                               | 97.1  | 75.0  | 9.7                                                             | 8.2   | 6.3   |
|                 |              |                      | Complex with SecB     | 70.7                                                | 57.8  | 46.1  | 2.9                                                             | 2.4   | 1.9   |
|                 |              |                      | Complex with TF (Tig) | 77.7                                                | 65.7  | 50.7  | 3.8                                                             | 3.2   | 2.5   |
| P23484          | FecI         |                      | Monomer               | 132.8                                               | 112.2 | 86.7  | 13.4                                                            | 11.3  | 8.8   |
| P23485          | FecR         | Periplasm            | Monomer               | 105.0                                               | 88.7  | 68.5  | 7.9                                                             | 6.6   | 5.1   |
|                 |              |                      | Complex with SecB     | 68.7                                                | 56.1  | 44.8  | 2.7                                                             | 2.2   | 1.8   |
|                 |              |                      | Complex with TF (Tig) | 75.0                                                | 63.4  | 48.9  | 3.4                                                             | 2.9   | 2.2   |
| P0AEL3          | FeoA         |                      | Monomer               | 185.0                                               | 156.3 | 120.7 | 26.9                                                            | 22.8  | 17.6  |
| P33650          | FeoB         | Cell inner membrane  | Monomer               | 74.7                                                | 63.1  | 48.8  | 3.4                                                             | 2.9   | 2.2   |
|                 |              |                      | Complex with SecB     | 59.1                                                | 48.3  | 38.6  | 1.8                                                             | 1.5   | 1.2   |
|                 |              |                      | Complex with TF (Tig) | 62.6                                                | 52.9  | 40.9  | 2.1                                                             | 1.8   | 1.4   |
| P64638          | FeoC         |                      | Monomer               | 182.5                                               | 154.2 | 119.1 | 26.2                                                            | 22.2  | 17.1  |
| P05825          | FepA         | Cell outer membrane  | Monomer               | 75.6                                                | 63.8  | 49.3  | 3.5                                                             | 2.9   | 2.3   |
|                 |              |                      | Complex with SecB     | 59.5                                                | 48.6  | 38.8  | 1.8                                                             | 1.5   | 1.2   |
|                 |              |                      | Complex with TF (Tig) | 63.1                                                | 53.3  | 41.2  | 2.2                                                             | 1.8   | 1.4   |
| P0AEL6          | FepB         | Periplasm            | Monomer               | 106.4                                               | 89.9  | 69.5  | 8.1                                                             | 6.9   | 5.3   |
|                 |              |                      | Complex with SecB     | 69.0                                                | 56.4  | 45.1  | 2.8                                                             | 2.2   | 1.8   |
|                 |              |                      | Complex with TF (Tig) | 75.4                                                | 63.7  | 49.2  | 3.5                                                             | 2.9   | 2.3   |
| P23878          | FepC         | Cell inner membrane  | Monomer               | 112.5                                               | 95.0  | 73.4  | 9.2                                                             | 7.8   | 6.0   |
|                 |              |                      | Complex with SecB     | 70.3                                                | 57.4  | 45.9  | 2.9                                                             | 2.4   | 1.9   |
|                 |              |                      | Complex with TF (Tig) | 77.1                                                | 65.2  | 50.3  | 3.7                                                             | 3.1   | 2.4   |
| P23876          | FepD         | Cell inner membrane  | Monomer               | 106.9                                               | 90.3  | 69.8  | 8.2                                                             | 6.9   | 5.4   |

| UniProtKB A. N. | Protein name | Subcellular location     | Subunit               | $D_0 \left( \frac{\mu\text{m}^2}{\text{s}} \right)$ |       |       | $D_{\text{cyto}} \left( \frac{\mu\text{m}^2}{\text{s}} \right)$ |       |       |
|-----------------|--------------|--------------------------|-----------------------|-----------------------------------------------------|-------|-------|-----------------------------------------------------------------|-------|-------|
|                 |              |                          |                       | 310 K                                               | 303 K | 293 K | 310 K                                                           | 303 K | 293 K |
|                 |              |                          | Complex with SecB     | 69.2                                                | 56.5  | 45.1  | 2.8                                                             | 2.3   | 1.8   |
|                 |              |                          | Complex with TF (Tig) | 75.6                                                | 63.9  | 49.3  | 3.5                                                             | 2.9   | 2.3   |
| P26266          | FepE         | Cell inner membrane      | Monomer               | 98.2                                                | 83.0  | 64.1  | 6.7                                                             | 5.7   | 4.4   |
|                 |              |                          | Complex with SecB     | 67.1                                                | 54.8  | 43.8  | 2.5                                                             | 2.1   | 1.7   |
|                 |              |                          | Complex with TF (Tig) | 72.8                                                | 61.5  | 47.5  | 3.2                                                             | 2.7   | 2.1   |
| P23877          | FepG         | Cell inner membrane      | Monomer               | 105.7                                               | 89.3  | 69.0  | 8.0                                                             | 6.7   | 5.2   |
|                 |              |                          | Complex with SecB     | 68.9                                                | 56.3  | 45.0  | 2.7                                                             | 2.2   | 1.8   |
|                 |              |                          | Complex with TF (Tig) | 75.2                                                | 63.5  | 49.1  | 3.4                                                             | 2.9   | 2.2   |
| P13039          | Fes          | Cytoplasm                | Monomer               | 97.8                                                | 82.6  | 63.8  | 6.6                                                             | 5.6   | 4.3   |
| P0AGD7          | Ffh          |                          | Monomer               | 92.0                                                | 77.7  | 60.0  | 5.7                                                             | 4.8   | 3.7   |
| Q47153          | FhiA         | Cell inner membrane      | Monomer               | 83.8                                                | 70.8  | 54.7  | 4.5                                                             | 3.8   | 3.0   |
|                 |              |                          | Complex with SecB     | 62.7                                                | 51.2  | 40.9  | 2.1                                                             | 1.7   | 1.4   |
|                 |              |                          | Complex with TF (Tig) | 67.1                                                | 56.7  | 43.8  | 2.5                                                             | 2.1   | 1.7   |
| P19323          | FhlA         |                          | Monomer               | 76.9                                                | 65.0  | 50.2  | 3.7                                                             | 3.1   | 2.4   |
| P06971          | FhuA         | Cell outer membrane      | Monomer               | 75.6                                                | 63.8  | 49.3  | 3.5                                                             | 2.9   | 2.3   |
|                 |              |                          | Complex with SecB     | 59.5                                                | 48.6  | 38.8  | 1.8                                                             | 1.5   | 1.2   |
|                 |              |                          | Complex with TF (Tig) | 63.0                                                | 53.3  | 41.1  | 2.2                                                             | 1.8   | 1.4   |
| P06972          | FhuB         | Cell inner membrane      | Monomer               | 80.3                                                | 67.8  | 52.4  | 4.1                                                             | 3.4   | 2.7   |
|                 |              |                          | Complex with SecB     | 61.4                                                | 50.2  | 40.1  | 2.0                                                             | 1.6   | 1.3   |
|                 |              |                          | Complex with TF (Tig) | 65.4                                                | 55.3  | 42.7  | 2.4                                                             | 2.0   | 1.6   |
| P07821          | FhuC         | Cell inner membrane      | Monomer               | 113.8                                               | 96.2  | 74.3  | 9.5                                                             | 8.0   | 6.2   |
|                 |              |                          | Complex with SecB     | 70.5                                                | 57.6  | 46.0  | 2.9                                                             | 2.4   | 1.9   |
|                 |              |                          | Complex with TF (Tig) | 77.5                                                | 65.5  | 50.6  | 3.7                                                             | 3.1   | 2.4   |
| P07822          | FhuD         | Periplasm                | Monomer               | 108.0                                               | 91.3  | 70.5  | 8.4                                                             | 7.1   | 5.5   |
|                 |              |                          | Complex with SecB     | 69.4                                                | 56.7  | 45.3  | 2.8                                                             | 2.3   | 1.8   |
|                 |              |                          | Complex with TF (Tig) | 75.9                                                | 64.1  | 49.5  | 3.5                                                             | 3.0   | 2.3   |
| P16869          | FhuE         | Cell outer membrane      | Monomer               | 75.9                                                | 64.1  | 49.5  | 3.5                                                             | 3.0   | 2.3   |
|                 |              |                          | Complex with SecB     | 59.6                                                | 48.7  | 38.9  | 1.8                                                             | 1.5   | 1.2   |
|                 |              |                          | Complex with TF (Tig) | 63.2                                                | 53.4  | 41.3  | 2.2                                                             | 1.8   | 1.4   |
| P39405          | FhuF         | Cytoplasm. Cell membrane | Monomer               | 112.0                                               | 94.6  | 73.1  | 9.1                                                             | 7.7   | 6.0   |

| UniProtKB A. N. | Protein name | Subcellular location | Subunit               | $D_0 \left( \frac{\mu\text{m}^2}{\text{s}} \right)$ |       |       | $D_{\text{cyto}} \left( \frac{\mu\text{m}^2}{\text{s}} \right)$ |       |       |
|-----------------|--------------|----------------------|-----------------------|-----------------------------------------------------|-------|-------|-----------------------------------------------------------------|-------|-------|
|                 |              |                      |                       | 310 K                                               | 303 K | 293 K | 310 K                                                           | 303 K | 293 K |
| P20605          | Fic          |                      | Monomer               | 124.5                                               | 105.2 | 81.3  | 11.6                                                            | 9.8   | 7.6   |
| P69380          | FieF         | Cell inner membrane  | Monomer               | 108.1                                               | 91.4  | 70.6  | 8.4                                                             | 7.1   | 5.5   |
|                 |              |                      | Complex with SecB     | 69.4                                                | 56.7  | 45.3  | 2.8                                                             | 2.3   | 1.8   |
|                 |              |                      | Complex with TF (Tig) | 75.9                                                | 64.2  | 49.6  | 3.5                                                             | 3.0   | 2.3   |
| P04128          | FimA         | Fimbrium             | Monomer               | 136.7                                               | 115.5 | 89.2  | 14.3                                                            | 12.1  | 9.3   |
|                 |              |                      | Complex with SecB     | 73.8                                                | 60.3  | 48.2  | 3.3                                                             | 2.7   | 2.1   |
|                 |              |                      | Complex with TF (Tig) | 82.2                                                | 69.4  | 53.6  | 4.3                                                             | 3.7   | 2.8   |
| P0ADH5          | FimB         |                      | Monomer               | 124.5                                               | 105.2 | 81.2  | 11.6                                                            | 9.8   | 7.6   |
| P31697          | FimC         | Periplasm            | Monomer               | 117.4                                               | 99.2  | 76.6  | 10.2                                                            | 8.6   | 6.6   |
|                 |              |                      | Complex with SecB     | 71.1                                                | 58.1  | 46.4  | 3.0                                                             | 2.4   | 1.9   |
|                 |              |                      | Complex with TF (Tig) | 78.4                                                | 66.2  | 51.1  | 3.8                                                             | 3.2   | 2.5   |
| P30130          | FimD         | Cell outer membrane  | Monomer               | 70.9                                                | 59.9  | 46.3  | 3.0                                                             | 2.5   | 1.9   |
|                 |              |                      | Complex with SecB     | 57.4                                                | 46.9  | 37.5  | 1.7                                                             | 1.4   | 1.1   |
|                 |              |                      | Complex with TF (Tig) | 60.5                                                | 51.1  | 39.5  | 1.9                                                             | 1.6   | 1.3   |
| P0ADH7          | FimE         |                      | Monomer               | 124.2                                               | 104.9 | 81.1  | 11.6                                                            | 9.8   | 7.6   |
| P08189          | FimF         | Fimbrium             | Monomer               | 134.9                                               | 114.0 | 88.1  | 13.9                                                            | 11.7  | 9.1   |
|                 |              |                      | Complex with SecB     | 73.6                                                | 60.1  | 48.0  | 3.3                                                             | 2.7   | 2.1   |
|                 |              |                      | Complex with TF (Tig) | 81.9                                                | 69.2  | 53.4  | 4.3                                                             | 3.6   | 2.8   |
| P08190          | FimG         | Fimbrium             | Monomer               | 139.1                                               | 117.5 | 90.8  | 14.9                                                            | 12.6  | 9.7   |
|                 |              |                      | Complex with SecB     | 74.1                                                | 60.5  | 48.3  | 3.3                                                             | 2.7   | 2.2   |
|                 |              |                      | Complex with TF (Tig) | 82.6                                                | 69.8  | 53.9  | 4.4                                                             | 3.7   | 2.9   |
| P08191          | FimH         | Fimbrium             | Monomer               | 110.1                                               | 93.0  | 71.8  | 8.8                                                             | 7.4   | 5.7   |
|                 |              |                      | Complex with SecB     | 69.8                                                | 57.0  | 45.5  | 2.8                                                             | 2.3   | 1.8   |
|                 |              |                      | Complex with TF (Tig) | 76.5                                                | 64.6  | 49.9  | 3.6                                                             | 3.0   | 2.3   |
| P39264          | FimI         | Fimbrium             | Monomer               | 133.1                                               | 112.5 | 86.9  | 13.5                                                            | 11.4  | 8.8   |
|                 |              |                      | Complex with SecB     | 73.4                                                | 60.0  | 47.9  | 3.2                                                             | 2.6   | 2.1   |
|                 |              |                      | Complex with TF (Tig) | 81.6                                                | 68.9  | 53.2  | 4.2                                                             | 3.6   | 2.8   |
| P0AEL8          | FimZ         | Cytoplasm            | Monomer               | 123.1                                               | 104.0 | 80.3  | 11.3                                                            | 9.6   | 7.4   |
| P0A6R3          | Fis          |                      | Monomer               | 164.8                                               | 139.2 | 107.5 | 21.3                                                            | 18.0  | 13.9  |
|                 |              |                      | Homodimer             | 125.6                                               | 102.6 | 81.9  | 11.9                                                            | 9.7   | 7.7   |
| P75780          | Fiu          | Cell outer membrane  | Monomer               | 75.6                                                | 63.9  | 49.4  | 3.5                                                             | 3.0   | 2.3   |

| UniProtKB A. N. | Protein name | Subcellular location           | Subunit                 | $D_0 \left( \frac{\mu\text{m}^2}{\text{s}} \right)$ |       |       | $D_{\text{cyto}} \left( \frac{\mu\text{m}^2}{\text{s}} \right)$ |       |       |
|-----------------|--------------|--------------------------------|-------------------------|-----------------------------------------------------|-------|-------|-----------------------------------------------------------------|-------|-------|
|                 |              |                                |                         | 310 K                                               | 303 K | 293 K | 310 K                                                           | 303 K | 293 K |
|                 |              |                                | Complex with SecB       | 59.5                                                | 48.6  | 38.8  | 1.8                                                             | 1.5   | 1.2   |
|                 |              |                                | Complex with TF (Tig)   | 63.1                                                | 53.3  | 41.2  | 2.2                                                             | 1.8   | 1.4   |
| P60566          | FixA         |                                | Monomer                 | 116.6                                               | 98.5  | 76.1  | 10.0                                                            | 8.5   | 6.5   |
|                 |              |                                | Heterodimer (FixA–FixB) | 85.1                                                | 71.9  | 55.5  | 4.7                                                             | 4.0   | 3.1   |
| P31574          | FixB         |                                | Monomer                 | 107.4                                               | 90.7  | 70.1  | 8.3                                                             | 7.0   | 5.4   |
|                 |              |                                | Heterodimer (FixA–FixB) | 85.1                                                | 71.9  | 55.5  | 4.7                                                             | 4.0   | 3.1   |
| P68644          | FixC         |                                | Monomer                 | 95.1                                                | 80.3  | 62.1  | 6.2                                                             | 5.2   | 4.1   |
| P68646          | FixX         |                                | Monomer                 | 169.4                                               | 143.1 | 110.5 | 22.5                                                            | 19.0  | 14.7  |
| P0A9L3          | FklB         | Cytoplasm Periplasm            | Monomer                 | 126.2                                               | 106.6 | 82.3  | 12.0                                                            | 10.1  | 7.8   |
|                 |              |                                | Homodimer               | 96.1                                                | 78.5  | 62.7  | 6.4                                                             | 5.2   | 4.2   |
| P45523          | FkpA         | Periplasm                      | Monomer                 | 113.8                                               | 96.2  | 74.3  | 9.5                                                             | 8.0   | 6.2   |
|                 |              |                                | Complex with SecB       | 70.5                                                | 57.6  | 46.0  | 2.9                                                             | 2.4   | 1.9   |
|                 |              |                                | Complex with TF (Tig)   | 77.5                                                | 65.5  | 50.6  | 3.7                                                             | 3.1   | 2.4   |
| P0AEM0          | FkpB         |                                | Monomer                 | 143.2                                               | 121.0 | 93.4  | 15.8                                                            | 13.4  | 10.3  |
| P61949          | FldA         |                                | Monomer                 | 132.2                                               | 111.6 | 86.2  | 13.3                                                            | 11.2  | 8.7   |
| P0ABY4          | FldB         |                                | Monomer                 | 132.3                                               | 111.7 | 86.3  | 13.3                                                            | 11.2  | 8.7   |
| P75933          | FlgA         | Periplasm                      | Monomer                 | 123.4                                               | 104.2 | 80.5  | 11.4                                                            | 9.6   | 7.4   |
|                 |              |                                | Complex with SecB       | 72.1                                                | 58.9  | 47.0  | 3.1                                                             | 2.5   | 2.0   |
|                 |              |                                | Complex with TF (Tig)   | 79.7                                                | 67.3  | 52.0  | 4.0                                                             | 3.4   | 2.6   |
| P0ABW9          | FlgB         | Bacterial flagellum basal body | Monomer                 | 146.3                                               | 123.6 | 95.4  | 16.5                                                            | 14.0  | 10.8  |
|                 |              |                                | Complex with SecB       | 74.8                                                | 61.1  | 48.8  | 3.4                                                             | 2.8   | 2.2   |
|                 |              |                                | Complex with TF (Tig)   | 83.6                                                | 70.6  | 54.6  | 4.5                                                             | 3.8   | 2.9   |
| P0ABX2          | FlgC         | Bacterial flagellum basal body | Monomer                 | 151.3                                               | 127.9 | 98.8  | 17.8                                                            | 15.0  | 11.6  |
|                 |              |                                | Complex with SecB       | 75.2                                                | 61.5  | 49.1  | 3.4                                                             | 2.8   | 2.3   |
|                 |              |                                | Complex with TF (Tig)   | 84.3                                                | 71.2  | 55.0  | 4.6                                                             | 3.9   | 3.0   |
| P75936          | FlgD         |                                | Monomer                 | 123.3                                               | 104.1 | 80.4  | 11.4                                                            | 9.6   | 7.4   |
| P75937          | FlgE         | Bacterial flagellum basal body | Monomer                 | 98.3                                                | 83.0  | 64.1  | 6.7                                                             | 5.7   | 4.4   |
|                 |              |                                | Complex with SecB       | 67.1                                                | 54.8  | 43.8  | 2.5                                                             | 2.1   | 1.7   |
|                 |              |                                | Complex with TF (Tig)   | 72.8                                                | 61.5  | 47.5  | 3.2                                                             | 2.7   | 2.1   |
| P75938          | FlgF         | Bacterial flagellum basal body | Monomer                 | 118.8                                               | 100.3 | 77.5  | 10.5                                                            | 8.8   | 6.8   |
|                 |              |                                | Complex with SecB       | 71.4                                                | 58.3  | 46.6  | 3.0                                                             | 2.5   | 2.0   |

| UniProtKB A. N. | Protein name | Subcellular location                     | Subunit                                               | $D_0 \left( \frac{\mu\text{m}^2}{\text{s}} \right)$ |       |       | $D_{\text{cyto}} \left( \frac{\mu\text{m}^2}{\text{s}} \right)$ |       |       |
|-----------------|--------------|------------------------------------------|-------------------------------------------------------|-----------------------------------------------------|-------|-------|-----------------------------------------------------------------|-------|-------|
|                 |              |                                          |                                                       | 310 K                                               | 303 K | 293 K | 310 K                                                           | 303 K | 293 K |
|                 |              |                                          | Complex with TF (Tig)                                 | 78.7                                                | 66.5  | 51.3  | 3.9                                                             | 3.3   | 2.5   |
| P0ABX5          | FlgG         | Bacterial flagellum basal body           | Monomer                                               | 115.6                                               | 97.7  | 75.5  | 9.8                                                             | 8.3   | 6.4   |
|                 |              |                                          | Complex with SecB                                     | 70.8                                                | 57.9  | 46.2  | 2.9                                                             | 2.4   | 1.9   |
|                 |              |                                          | Complex with TF (Tig)                                 | 77.9                                                | 65.8  | 50.9  | 3.8                                                             | 3.2   | 2.5   |
| P0A6S0          | FlgH         | Cell outer membrane                      | Monomer                                               | 121.2                                               | 102.4 | 79.1  | 10.9                                                            | 9.3   | 7.1   |
|                 |              |                                          | Complex with SecB                                     | 71.8                                                | 58.6  | 46.8  | 3.0                                                             | 2.5   | 2.0   |
|                 |              |                                          | Complex with TF (Tig)                                 | 79.2                                                | 66.9  | 51.7  | 3.9                                                             | 3.3   | 2.6   |
| P0A6S3          | FlgI         | Periplasm Bacterial flagellum basal body | Monomer                                               | 102.0                                               | 86.2  | 66.6  | 7.4                                                             | 6.2   | 4.8   |
|                 |              |                                          | Complex with SecB                                     | 68.1                                                | 55.6  | 44.4  | 2.6                                                             | 2.2   | 1.7   |
|                 |              |                                          | Complex with TF (Tig)                                 | 74.1                                                | 62.6  | 48.4  | 3.3                                                             | 2.8   | 2.2   |
| P75942          | FlgJ         | Periplasm                                | Monomer                                               | 106.2                                               | 89.7  | 69.3  | 8.1                                                             | 6.8   | 5.3   |
|                 |              |                                          | Complex with SecB                                     | 69.0                                                | 56.4  | 45.0  | 2.7                                                             | 2.2   | 1.8   |
|                 |              |                                          | Complex with TF (Tig)                                 | 75.4                                                | 63.7  | 49.2  | 3.5                                                             | 2.9   | 2.3   |
| P33235          | FlgK         | Secreted Bacterial flagellum             | Monomer                                               | 86.7                                                | 73.2  | 56.5  | 4.9                                                             | 4.2   | 3.2   |
|                 |              |                                          | Complex with SecB                                     | 63.7                                                | 52.0  | 41.6  | 2.2                                                             | 1.8   | 1.4   |
|                 |              |                                          | Complex with TF (Tig)                                 | 68.3                                                | 57.7  | 44.6  | 2.7                                                             | 2.3   | 1.7   |
| P29744          | FlgL         | Secreted Bacterial flagellum             | Monomer                                               | 106.4                                               | 89.9  | 69.5  | 8.1                                                             | 6.9   | 5.3   |
|                 |              |                                          | Complex with SecB                                     | 69.0                                                | 56.4  | 45.1  | 2.8                                                             | 2.2   | 1.8   |
|                 |              |                                          | Complex with TF (Tig)                                 | 75.4                                                | 63.7  | 49.2  | 3.5                                                             | 2.9   | 2.3   |
| P0AEM4          | FlgM         |                                          | Monomer                                               | 170.3                                               | 143.8 | 111.1 | 22.8                                                            | 19.2  | 14.9  |
| P43533          | FlgN         | Cytoplasm                                | Monomer                                               | 144.0                                               | 121.6 | 93.9  | 16.0                                                            | 13.5  | 10.4  |
| P76298          | FlhA         | Cell inner membrane                      | Monomer                                               | 78.4                                                | 66.2  | 51.1  | 3.8                                                             | 3.2   | 2.5   |
|                 |              |                                          | Complex with SecB                                     | 60.6                                                | 49.5  | 39.6  | 1.9                                                             | 1.6   | 1.3   |
|                 |              |                                          | Complex with TF (Tig)                                 | 64.5                                                | 54.5  | 42.1  | 2.3                                                             | 1.9   | 1.5   |
| P76299          | FlhB         | Cell inner membrane                      | Monomer                                               | 98.1                                                | 82.9  | 64.0  | 6.7                                                             | 5.7   | 4.4   |
|                 |              |                                          | Complex with SecB                                     | 67.1                                                | 54.8  | 43.8  | 2.5                                                             | 2.1   | 1.7   |
|                 |              |                                          | Complex with TF (Tig)                                 | 72.8                                                | 61.5  | 47.5  | 3.2                                                             | 2.7   | 2.1   |
| P0ABY7          | FlhC         | Cytoplasm                                | Monomer                                               | 127.6                                               | 107.8 | 83.3  | 12.3                                                            | 10.4  | 8.0   |
|                 |              |                                          | Heterohexamer (FlhC <sub>2</sub> -FlhD <sub>4</sub> ) | 89.6                                                | 75.7  | 58.4  | 5.4                                                             | 4.5   | 3.5   |
| P0A8S9          | FlhD         | Cytoplasm                                | Monomer                                               | 154.2                                               | 130.3 | 100.6 | 18.5                                                            | 15.6  | 12.1  |
|                 |              |                                          | Homodimer                                             | 117.5                                               | 96.0  | 76.7  | 10.2                                                            | 8.3   | 6.7   |



| UniProtKB A. N. | Protein name | Subcellular location           | Subunit                                               | $D_0 \left( \frac{\mu\text{m}^2}{\text{s}} \right)$ |       |       | $D_{\text{cyto}} \left( \frac{\mu\text{m}^2}{\text{s}} \right)$ |       |       |
|-----------------|--------------|--------------------------------|-------------------------------------------------------|-----------------------------------------------------|-------|-------|-----------------------------------------------------------------|-------|-------|
|                 |              |                                |                                                       | 310 K                                               | 303 K | 293 K | 310 K                                                           | 303 K | 293 K |
|                 |              |                                | Heterohexamer (FlhC <sub>2</sub> –FlhD <sub>4</sub> ) | 89.6                                                | 75.7  | 58.4  | 5.4                                                             | 4.5   | 3.5   |
| P76297          | FlhE         |                                | Monomer                                               | 151.0                                               | 127.5 | 98.5  | 17.7                                                            | 15.0  | 11.6  |
| P0AEM6          | FliA         |                                | Monomer                                               | 116.0                                               | 98.0  | 75.7  | 9.9                                                             | 8.4   | 6.5   |
|                 |              |                                | Monomer                                               | 90.9                                                | 76.8  | 59.3  | 5.6                                                             | 4.7   | 3.6   |
| P04949          | FliC         | Secreted Bacterial flagellum   | Complex with SecB                                     | 65.0                                                | 53.1  | 42.4  | 2.3                                                             | 1.9   | 1.5   |
|                 |              |                                | Complex with TF (Tig)                                 | 70.1                                                | 59.2  | 45.7  | 2.9                                                             | 2.4   | 1.9   |
|                 |              |                                | Monomer                                               | 92.9                                                | 78.5  | 60.6  | 5.9                                                             | 5.0   | 3.8   |
| P24216          | FliD         | Secreted Bacterial flagellum   | Complex with SecB                                     | 65.7                                                | 53.6  | 42.8  | 2.4                                                             | 2.0   | 1.6   |
|                 |              |                                | Complex with TF (Tig)                                 | 70.9                                                | 59.9  | 46.3  | 3.0                                                             | 2.5   | 1.9   |
|                 |              |                                | Monomer                                               | 165.4                                               | 139.8 | 108.0 | 21.5                                                            | 18.1  | 14.0  |
| P0A8T5          | FliE         | Bacterial flagellum basal body | Complex with SecB                                     | 76.3                                                | 62.3  | 49.8  | 3.6                                                             | 2.9   | 2.3   |
|                 |              |                                | Complex with TF (Tig)                                 | 85.8                                                | 72.5  | 56.0  | 4.8                                                             | 4.1   | 3.2   |
|                 |              |                                | Monomer                                               | 85.1                                                | 71.9  | 55.6  | 4.7                                                             | 4.0   | 3.1   |
| P25798          | FliF         | Cell inner membrane            | Complex with SecB                                     | 63.2                                                | 51.6  | 41.2  | 2.2                                                             | 1.8   | 1.4   |
|                 |              |                                | Complex with TF (Tig)                                 | 67.7                                                | 57.2  | 44.2  | 2.6                                                             | 2.2   | 1.7   |
| P0ABZ1          | FliG         | Cell inner membrane            | Monomer                                               | 103.5                                               | 87.5  | 67.6  | 7.6                                                             | 6.4   | 5.0   |
| P31068          | FliH         | Cytoplasm                      | Monomer                                               | 120.4                                               | 101.7 | 78.5  | 10.8                                                            | 9.1   | 7.0   |
| P52612          | FliI         | Cytoplasm                      | Monomer                                               | 92.3                                                | 78.0  | 60.2  | 5.8                                                             | 4.9   | 3.8   |
| P52613          | FliJ         | Cell membrane                  | Monomer                                               | 139.1                                               | 117.5 | 90.8  | 14.9                                                            | 12.6  | 9.7   |
| P52614          | FliK         |                                | Monomer                                               | 100.9                                               | 85.2  | 65.8  | 7.2                                                             | 6.0   | 4.7   |
|                 |              |                                | Monomer                                               | 139.4                                               | 117.8 | 91.0  | 14.9                                                            | 12.6  | 9.7   |
| P0ABX8          | FliL         | Cell inner membrane            | Complex with SecB                                     | 74.1                                                | 60.5  | 48.4  | 3.3                                                             | 2.7   | 2.2   |
|                 |              |                                | Complex with TF (Tig)                                 | 82.6                                                | 69.8  | 53.9  | 4.4                                                             | 3.7   | 2.9   |
|                 |              |                                | Monomer                                               | 102.4                                               | 86.5  | 66.8  | 7.4                                                             | 6.3   | 4.8   |
| P06974          | FliM         | Cell inner membrane            | Complex with SecB                                     | 68.1                                                | 55.7  | 44.5  | 2.7                                                             | 2.2   | 1.7   |
|                 |              |                                | Complex with TF (Tig)                                 | 74.2                                                | 62.7  | 48.4  | 3.3                                                             | 2.8   | 2.2   |
| P15070          | FliN         | Cell inner membrane            | Monomer                                               | 147.7                                               | 124.8 | 96.4  | 16.9                                                            | 14.3  | 11.0  |
|                 |              |                                | Monomer                                               | 157.2                                               | 132.8 | 102.6 | 19.3                                                            | 16.3  | 12.6  |
| P22586          | FliO         | Cell membrane                  | Complex with SecB                                     | 75.7                                                | 61.8  | 49.4  | 3.5                                                             | 2.9   | 2.3   |
|                 |              |                                | Complex with TF (Tig)                                 | 85.0                                                | 71.8  | 55.5  | 4.7                                                             | 4.0   | 3.1   |
|                 |              |                                | Monomer                                               | 117.0                                               | 98.8  | 76.3  | 10.1                                                            | 8.5   | 6.6   |
| P0AC05          | FliP         | Cell inner membrane            |                                                       |                                                     |       |       |                                                                 |       |       |

| UniProtKB A. N. | Protein name | Subcellular location                             | Subunit               | $D_0 \left( \frac{\mu\text{m}^2}{\text{s}} \right)$ |       |       | $D_{\text{cyto}} \left( \frac{\mu\text{m}^2}{\text{s}} \right)$ |       |       |
|-----------------|--------------|--------------------------------------------------|-----------------------|-----------------------------------------------------|-------|-------|-----------------------------------------------------------------|-------|-------|
|                 |              |                                                  |                       | 310 K                                               | 303 K | 293 K | 310 K                                                           | 303 K | 293 K |
|                 |              |                                                  | Complex with SecB     | 71.1                                                | 58.1  | 46.4  | 3.0                                                             | 2.4   | 1.9   |
|                 |              |                                                  | Complex with TF (Tig) | 78.3                                                | 66.1  | 51.1  | 3.8                                                             | 3.2   | 2.5   |
| P0AC07          | FliQ         | Cell inner membrane                              | Monomer               | 175.1                                               | 147.9 | 114.2 | 24.1                                                            | 20.4  | 15.7  |
|                 |              |                                                  | Complex with SecB     | 76.8                                                | 62.8  | 50.1  | 3.6                                                             | 3.0   | 2.4   |
|                 |              |                                                  | Complex with TF (Tig) | 86.7                                                | 73.3  | 56.6  | 5.0                                                             | 4.2   | 3.2   |
| P33135          | FliR         | Cell inner membrane                              | Monomer               | 114.4                                               | 96.6  | 74.6  | 9.6                                                             | 8.1   | 6.3   |
|                 |              |                                                  | Complex with SecB     | 70.6                                                | 57.7  | 46.1  | 2.9                                                             | 2.4   | 1.9   |
|                 |              |                                                  | Complex with TF (Tig) | 77.6                                                | 65.6  | 50.6  | 3.7                                                             | 3.2   | 2.4   |
| P26608          | FliS         | Cytoplasm > cytosol                              | Monomer               | 147.4                                               | 124.5 | 96.2  | 16.8                                                            | 14.2  | 11.0  |
| P0ABY2          | FliT         | Cytoplasm > cytosol                              | Monomer               | 151.9                                               | 128.4 | 99.1  | 17.9                                                            | 15.2  | 11.7  |
|                 |              |                                                  | Homodimer             | 115.8                                               | 94.6  | 75.6  | 9.9                                                             | 8.1   | 6.4   |
| P0AEM9          | FliY         | Periplasm                                        | Monomer               | 113.6                                               | 96.0  | 74.1  | 9.4                                                             | 8.0   | 6.2   |
|                 |              |                                                  | Complex with SecB     | 70.5                                                | 57.6  | 46.0  | 2.9                                                             | 2.4   | 1.9   |
|                 |              |                                                  | Complex with TF (Tig) | 77.4                                                | 65.4  | 50.5  | 3.7                                                             | 3.1   | 2.4   |
| P52627          | FliZ         |                                                  | Monomer               | 127.4                                               | 107.7 | 83.2  | 12.3                                                            | 10.4  | 8.0   |
| P15286          | Flk          | Cell inner membrane                              | Monomer               | 103.7                                               | 87.6  | 67.6  | 7.6                                                             | 6.4   | 5.0   |
|                 |              |                                                  | Complex with SecB     | 68.4                                                | 55.9  | 44.7  | 2.7                                                             | 2.2   | 1.8   |
|                 |              |                                                  | Complex with TF (Tig) | 74.6                                                | 63.0  | 48.7  | 3.4                                                             | 2.9   | 2.2   |
| P39180          | Flu          | Periplasm. Secreted. Cell surface. Cell envelope | Monomer               | 68.2                                                | 57.6  | 44.5  | 2.7                                                             | 2.2   | 1.7   |
|                 |              |                                                  | Complex with SecB     | 56.1                                                | 45.8  | 36.6  | 1.5                                                             | 1.3   | 1.0   |
|                 |              |                                                  | Complex with TF (Tig) | 58.9                                                | 49.8  | 38.4  | 1.8                                                             | 1.5   | 1.2   |
| P77609          | FlxA         |                                                  | Monomer               | 159.5                                               | 134.8 | 104.1 | 19.9                                                            | 16.8  | 13.0  |
| P23882          | Fmt          |                                                  | Monomer               | 106.6                                               | 90.0  | 69.5  | 8.1                                                             | 6.9   | 5.3   |
| P0A9E5          | Fnr          | Cytoplasm                                        | Monomer               | 115.3                                               | 97.4  | 75.2  | 9.8                                                             | 8.3   | 6.4   |
|                 |              |                                                  | Homodimer             | 87.9                                                | 71.8  | 57.3  | 5.1                                                             | 4.2   | 3.3   |
| P0AC23          | FocA         | Cell inner membrane                              | Monomer               | 110.7                                               | 93.5  | 72.3  | 8.9                                                             | 7.5   | 5.8   |
|                 |              |                                                  | Complex with SecB     | 69.9                                                | 57.1  | 45.6  | 2.8                                                             | 2.3   | 1.9   |
|                 |              |                                                  | Complex with TF (Tig) | 76.7                                                | 64.8  | 50.0  | 3.6                                                             | 3.1   | 2.4   |
| P77733          | FocB         | Cell inner membrane                              | Monomer               | 111.3                                               | 94.1  | 72.7  | 9.0                                                             | 7.6   | 5.9   |
|                 |              |                                                  | Complex with SecB     | 70.0                                                | 57.2  | 45.7  | 2.9                                                             | 2.3   | 1.9   |
|                 |              |                                                  | Complex with TF (Tig) | 76.8                                                | 64.9  | 50.1  | 3.6                                                             | 3.1   | 2.4   |

| UniProtKB A. N. | Protein name | Subcellular location | Subunit               | $D_0 \left( \frac{\mu\text{m}^2}{\text{s}} \right)$ |       |       | $D_{\text{cyto}} \left( \frac{\mu\text{m}^2}{\text{s}} \right)$ |       |       |
|-----------------|--------------|----------------------|-----------------------|-----------------------------------------------------|-------|-------|-----------------------------------------------------------------|-------|-------|
|                 |              |                      |                       | 310 K                                               | 303 K | 293 K | 310 K                                                           | 303 K | 293 K |
| P0ABQ4          | FolA         |                      | Monomer               | 137.0                                               | 115.8 | 89.4  | 14.4                                                            | 12.1  | 9.4   |
| P0AC16          | FolB         |                      | Monomer               | 152.8                                               | 129.1 | 99.7  | 18.2                                                            | 15.4  | 11.9  |
|                 |              |                      | Homooctamer           | 67.6                                                | 55.3  | 44.1  | 2.6                                                             | 2.1   | 1.7   |
| P08192          | FolC         |                      | Monomer               | 95.3                                                | 80.5  | 62.2  | 6.2                                                             | 5.3   | 4.1   |
| P24186          | FolD         |                      | Monomer               | 110.7                                               | 93.5  | 72.2  | 8.9                                                             | 7.5   | 5.8   |
|                 |              |                      | Homodimer             | 84.3                                                | 68.9  | 55.0  | 4.6                                                             | 3.8   | 3.0   |
| P0A6T5          | FolE         |                      | Monomer               | 120.8                                               | 102.0 | 78.8  | 10.9                                                            | 9.2   | 7.1   |
|                 |              |                      | Homodecamer           | 49.0                                                | 40.0  | 32.0  | 1.0                                                             | 0.9   | 0.7   |
| P26281          | FolK         |                      | Monomer               | 136.8                                               | 115.6 | 89.3  | 14.3                                                            | 12.1  | 9.3   |
| P0AFS3          | FolM         |                      | Monomer               | 118.0                                               | 99.7  | 77.0  | 10.3                                                            | 8.7   | 6.7   |
| P0AC13          | FolP         |                      | Monomer               | 111.3                                               | 94.0  | 72.6  | 9.0                                                             | 7.6   | 5.9   |
|                 |              |                      | Homodimer             | 84.8                                                | 69.3  | 55.3  | 4.7                                                             | 3.8   | 3.1   |
| P0AC19          | FolX         |                      | Monomer               | 150.9                                               | 127.4 | 98.4  | 17.7                                                            | 14.9  | 11.5  |
|                 |              |                      | Homooctamer           | 66.8                                                | 54.5  | 43.6  | 2.5                                                             | 2.1   | 1.6   |
| P28861          | Fpr          |                      | Monomer               | 115.6                                               | 97.7  | 75.5  | 9.8                                                             | 8.3   | 6.4   |
| P69902          | Frc          |                      | Monomer               | 95.0                                                | 80.2  | 62.0  | 6.2                                                             | 5.2   | 4.0   |
|                 |              |                      | Homodimer             | 72.4                                                | 59.1  | 47.2  | 3.1                                                             | 2.5   | 2.0   |
| P00363          | FrdA         |                      | Monomer               | 82.3                                                | 69.6  | 53.7  | 4.3                                                             | 3.7   | 2.8   |
| P0AC47          | FrdB         |                      | Monomer               | 116.7                                               | 98.6  | 76.1  | 10.0                                                            | 8.5   | 6.6   |
| P0A8Q0          | FrdC         | Cell inner membrane  | Monomer               | 147.1                                               | 124.3 | 96.0  | 16.8                                                            | 14.2  | 10.9  |
|                 |              |                      | Complex with SecB     | 74.9                                                | 61.2  | 48.9  | 3.4                                                             | 2.8   | 2.2   |
|                 |              |                      | Complex with TF (Tig) | 83.7                                                | 70.7  | 54.6  | 4.5                                                             | 3.8   | 3.0   |
| P0A8Q3          | FrdD         | Cell inner membrane  | Monomer               | 155.2                                               | 131.1 | 101.2 | 18.8                                                            | 15.9  | 12.2  |
|                 |              |                      | Complex with SecB     | 75.5                                                | 61.7  | 49.3  | 3.5                                                             | 2.8   | 2.3   |
|                 |              |                      | Complex with TF (Tig) | 84.8                                                | 71.6  | 55.3  | 4.7                                                             | 3.9   | 3.1   |
| P0AEN1          | Fre          |                      | Monomer               | 118.2                                               | 99.8  | 77.1  | 10.3                                                            | 8.7   | 6.8   |
| P45539          | FrlA         | Cell inner membrane  | Monomer               | 93.6                                                | 79.1  | 61.1  | 6.0                                                             | 5.0   | 3.9   |
|                 |              |                      | Complex with SecB     | 65.9                                                | 53.8  | 43.0  | 2.4                                                             | 2.0   | 1.6   |
|                 |              |                      | Complex with TF (Tig) | 71.2                                                | 60.1  | 46.4  | 3.0                                                             | 2.5   | 1.9   |
| P0AC00          | FrlB         |                      | Monomer               | 101.6                                               | 85.9  | 66.3  | 7.3                                                             | 6.2   | 4.8   |
|                 |              |                      | Homododecamer         | 38.4                                                | 31.3  | 25.0  | 0.5                                                             | 0.4   | 0.3   |

| UniProtKB A. N. | Protein name | Subcellular location | Subunit               | $D_0 \left( \frac{\mu\text{m}^2}{\text{s}} \right)$ |       |       | $D_{\text{cyto}} \left( \frac{\mu\text{m}^2}{\text{s}} \right)$ |       |       |
|-----------------|--------------|----------------------|-----------------------|-----------------------------------------------------|-------|-------|-----------------------------------------------------------------|-------|-------|
|                 |              |                      |                       | 310 K                                               | 303 K | 293 K | 310 K                                                           | 303 K | 293 K |
| P45541          | FrlC         |                      | Monomer               | 110.5                                               | 93.3  | 72.1  | 8.9                                                             | 7.5   | 5.8   |
| P45543          | FrlD         |                      | Monomer               | 114.7                                               | 96.9  | 74.8  | 9.7                                                             | 8.2   | 6.3   |
| P45544          | FrlR         |                      | Monomer               | 115.5                                               | 97.6  | 75.4  | 9.8                                                             | 8.3   | 6.4   |
| P25437          | FrmA         | Cytoplasm            | Monomer               | 100.8                                               | 85.2  | 65.8  | 7.1                                                             | 6.0   | 4.7   |
|                 |              |                      | Homodimer             | 76.8                                                | 62.8  | 50.1  | 3.6                                                             | 3.0   | 2.4   |
| P51025          | FrmB         |                      | Monomer               | 110.1                                               | 93.0  | 71.9  | 8.8                                                             | 7.4   | 5.7   |
| P0AAP3          | FrmR         | Cytoplasm            | Monomer               | 170.4                                               | 144.0 | 111.2 | 22.8                                                            | 19.3  | 14.9  |
| P0A805          | Frr          | Cytoplasm            | Monomer               | 129.9                                               | 109.7 | 84.7  | 12.8                                                            | 10.8  | 8.3   |
| P04335          | FrsA         |                      | Monomer               | 94.0                                                | 79.5  | 61.4  | 6.0                                                             | 5.1   | 3.9   |
| P20966          | FruA         | Cell inner membrane  | Monomer               | 86.9                                                | 73.4  | 56.7  | 5.0                                                             | 4.2   | 3.2   |
|                 |              |                      | Complex with SecB     | 63.8                                                | 52.1  | 41.6  | 2.2                                                             | 1.8   | 1.4   |
|                 |              |                      | Complex with TF (Tig) | 68.5                                                | 57.8  | 44.7  | 2.7                                                             | 2.3   | 1.8   |
| P69811          | FruB         | Cytoplasm            | Monomer               | 100.5                                               | 84.9  | 65.6  | 7.1                                                             | 6.0   | 4.6   |
| P0AEW9          | FruK         |                      | Monomer               | 107.1                                               | 90.5  | 69.9  | 8.2                                                             | 7.0   | 5.4   |
| P0ADF0          | FruL         |                      | Monomer               | 266.7                                               | 225.3 | 174.0 | 54.4                                                            | 45.9  | 35.5  |
| P0ACP1          | FruR         |                      | Monomer               | 102.2                                               | 86.4  | 66.7  | 7.4                                                             | 6.2   | 4.8   |
| P32155          | FrvA         | Cytoplasm            | Monomer               | 143.2                                               | 120.9 | 93.4  | 15.8                                                            | 13.4  | 10.3  |
| P32154          | FrvB         | Cell inner membrane  | Monomer               | 91.0                                                | 76.9  | 59.4  | 5.6                                                             | 4.7   | 3.6   |
|                 |              |                      | Complex with SecB     | 65.1                                                | 53.2  | 42.5  | 2.3                                                             | 1.9   | 1.5   |
|                 |              |                      | Complex with TF (Tig) | 70.1                                                | 59.3  | 45.8  | 2.9                                                             | 2.4   | 1.9   |
| P32152          | FrvR         |                      | Monomer               | 82.3                                                | 69.6  | 53.7  | 4.3                                                             | 3.7   | 2.8   |
| P32153          | FrvX         |                      | Monomer               | 101.5                                               | 85.7  | 66.2  | 7.3                                                             | 6.1   | 4.7   |
| P69816          | FrwB         | Cytoplasm            | Monomer               | 164.7                                               | 139.2 | 107.5 | 21.3                                                            | 18.0  | 13.9  |
| P32672          | FrwC         | Cell inner membrane  | Monomer               | 103.2                                               | 87.2  | 67.3  | 7.6                                                             | 6.4   | 4.9   |
|                 |              |                      | Complex with SecB     | 68.3                                                | 55.8  | 44.6  | 2.7                                                             | 2.2   | 1.7   |
|                 |              |                      | Complex with TF (Tig) | 74.5                                                | 62.9  | 48.6  | 3.4                                                             | 2.8   | 2.2   |
| P32676          | FrwD         | Cytoplasm            | Monomer               | 157.4                                               | 133.0 | 102.7 | 19.3                                                            | 16.3  | 12.6  |
| P77439          | FryA         | Cytoplasm            | Monomer               | 72.2                                                | 61.0  | 47.1  | 3.1                                                             | 2.6   | 2.0   |
| P69808          | FryB         | Cytoplasm            | Monomer               | 162.0                                               | 136.9 | 105.7 | 20.5                                                            | 17.4  | 13.4  |
|                 |              |                      | Monomer               | 96.5                                                | 81.6  | 63.0  | 6.4                                                             | 5.4   | 4.2   |
| P77579          | FryC         | Cell inner membrane  | Complex with SecB     | 66.7                                                | 54.5  | 43.5  | 2.5                                                             | 2.0   | 1.6   |

| UniProtKB A. N. | Protein name | Subcellular location | Subunit               | $D_0 \left( \frac{\mu\text{m}^2}{\text{s}} \right)$ |       |       | $D_{\text{cyto}} \left( \frac{\mu\text{m}^2}{\text{s}} \right)$ |       |       |
|-----------------|--------------|----------------------|-----------------------|-----------------------------------------------------|-------|-------|-----------------------------------------------------------------|-------|-------|
|                 |              |                      |                       | 310 K                                               | 303 K | 293 K | 310 K                                                           | 303 K | 293 K |
|                 |              |                      | Complex with TF (Tig) | 72.2                                                | 61.0  | 47.1  | 3.1                                                             | 2.6   | 2.0   |
| P78055          | FsaA         | Cytoplasm            | Monomer               | 124.5                                               | 105.2 | 81.2  | 11.6                                                            | 9.8   | 7.6   |
|                 |              |                      | Homododecamer         | 47.0                                                | 38.4  | 30.7  | 0.9                                                             | 0.8   | 0.6   |
| P32669          | FsaB         | Cytoplasm            | Monomer               | 123.3                                               | 104.2 | 80.5  | 11.4                                                            | 9.6   | 7.4   |
| P52067          | Fsr          | Cell inner membrane  | Monomer               | 97.1                                                | 82.0  | 63.4  | 6.5                                                             | 5.5   | 4.3   |
|                 |              |                      | Complex with SecB     | 66.8                                                | 54.6  | 43.6  | 2.5                                                             | 2.1   | 1.6   |
|                 |              |                      | Complex with TF (Tig) | 72.4                                                | 61.2  | 47.3  | 3.1                                                             | 2.6   | 2.0   |
| P0A998          | FtnA         | Cytoplasm            | Monomer               | 133.0                                               | 112.3 | 86.8  | 13.5                                                            | 11.4  | 8.8   |
|                 |              |                      | Homooligomer          | 38.3                                                | 32.3  | 25.0  | 0.5                                                             | 0.4   | 0.3   |
| P0A9A2          | FtnB         | Cytoplasm            | Monomer               | 134.4                                               | 113.6 | 87.7  | 13.8                                                            | 11.6  | 9.0   |
| P0ABH0          | FtsA         |                      | Monomer               | 95.4                                                | 80.6  | 62.3  | 6.3                                                             | 5.3   | 4.1   |
| P0A6S5          | FtsB         | Cell inner membrane  | Monomer               | 162.6                                               | 137.4 | 106.1 | 20.7                                                            | 17.5  | 13.5  |
|                 |              |                      | Complex with SecB     | 76.1                                                | 62.2  | 49.6  | 3.6                                                             | 2.9   | 2.3   |
|                 |              |                      | Complex with TF (Tig) | 85.6                                                | 72.3  | 55.8  | 4.8                                                             | 4.0   | 3.1   |
| P0A9R7          | FtsE         |                      | Monomer               | 121.5                                               | 102.7 | 79.3  | 11.0                                                            | 9.3   | 7.2   |
| P0AAI3          | FtsH         | Cell inner membrane  | Monomer               | 80.1                                                | 67.7  | 52.3  | 4.1                                                             | 3.4   | 2.6   |
|                 |              |                      | Complex with SecB     | 61.3                                                | 50.1  | 40.0  | 2.0                                                             | 1.6   | 1.3   |
|                 |              |                      | Complex with TF (Tig) | 65.4                                                | 55.2  | 42.7  | 2.4                                                             | 2.0   | 1.5   |
| P0AD68          | FtsI         | Cell inner membrane  | Monomer               | 83.4                                                | 70.5  | 54.4  | 4.5                                                             | 3.8   | 2.9   |
|                 |              |                      | Complex with SecB     | 62.6                                                | 51.1  | 40.8  | 2.1                                                             | 1.7   | 1.4   |
|                 |              |                      | Complex with TF (Tig) | 66.9                                                | 56.5  | 43.7  | 2.5                                                             | 2.1   | 1.6   |
| P46889          | FtsK         | Cell inner membrane  | Monomer               | 60.2                                                | 50.9  | 39.3  | 1.9                                                             | 1.6   | 1.2   |
|                 |              |                      | Homohecamer           | 29.8                                                | 24.4  | 19.5  | 0.2                                                             | 0.2   | 0.1   |
| P0AEN4          | FtsL         | Cell inner membrane  | Monomer               | 152.8                                               | 129.1 | 99.7  | 18.2                                                            | 15.3  | 11.9  |
|                 |              |                      | Complex with SecB     | 75.4                                                | 61.6  | 49.2  | 3.5                                                             | 2.8   | 2.3   |
|                 |              |                      | Complex with TF (Tig) | 84.5                                                | 71.4  | 55.1  | 4.6                                                             | 3.9   | 3.0   |
| P29131          | FtsN         | Cell inner membrane  | Monomer               | 104.7                                               | 88.4  | 68.3  | 7.8                                                             | 6.6   | 5.1   |
|                 |              |                      | Complex with SecB     | 68.7                                                | 56.1  | 44.8  | 2.7                                                             | 2.2   | 1.8   |
|                 |              |                      | Complex with TF (Tig) | 74.9                                                | 63.3  | 48.9  | 3.4                                                             | 2.9   | 2.2   |
| P06136          | FtsQ         | Cell inner membrane  | Monomer               | 110.1                                               | 93.0  | 71.9  | 8.8                                                             | 7.4   | 5.7   |
|                 |              |                      | Complex with SecB     | 69.8                                                | 57.0  | 45.6  | 2.8                                                             | 2.3   | 1.8   |

| UniProtKB A. N. | Protein name | Subcellular location | Subunit               | $D_0 \left( \frac{\mu\text{m}^2}{\text{s}} \right)$ |       |       | $D_{\text{cyto}} \left( \frac{\mu\text{m}^2}{\text{s}} \right)$ |       |       |
|-----------------|--------------|----------------------|-----------------------|-----------------------------------------------------|-------|-------|-----------------------------------------------------------------|-------|-------|
|                 |              |                      |                       | 310 K                                               | 303 K | 293 K | 310 K                                                           | 303 K | 293 K |
|                 |              |                      | Complex with TF (Tig) | 76.5                                                | 64.6  | 49.9  | 3.6                                                             | 3.0   | 2.3   |
| P0ABG4          | FtsW         | Cell inner membrane  | Monomer               | 94.9                                                | 80.1  | 61.9  | 6.2                                                             | 5.2   | 4.0   |
|                 |              |                      | Complex with SecB     | 66.2                                                | 54.1  | 43.2  | 2.5                                                             | 2.0   | 1.6   |
|                 |              |                      | Complex with TF (Tig) | 71.6                                                | 60.5  | 46.7  | 3.0                                                             | 2.6   | 2.0   |
|                 |              |                      | Monomer               | 101.7                                               | 85.9  | 66.3  | 7.3                                                             | 6.2   | 4.8   |
| P0AC30          | FtsX         | Cell inner membrane  | Complex with SecB     | 68.0                                                | 55.5  | 44.4  | 2.6                                                             | 2.2   | 1.7   |
|                 |              |                      | Complex with TF (Tig) | 74.0                                                | 62.5  | 48.3  | 3.3                                                             | 2.8   | 2.2   |
|                 |              |                      | Monomer               | 88.7                                                | 75.0  | 57.9  | 5.2                                                             | 4.4   | 3.4   |
| P10121          | FtsY         | Cell inner membrane  | Complex with SecB     | 64.4                                                | 52.6  | 42.0  | 2.3                                                             | 1.9   | 1.5   |
|                 |              |                      | Complex with TF (Tig) | 69.2                                                | 58.5  | 45.2  | 2.8                                                             | 2.3   | 1.8   |
|                 |              |                      | Monomer               | 99.9                                                | 84.4  | 65.2  | 7.0                                                             | 5.9   | 4.6   |
| P0A9A6          | FtsZ         | Cytoplasm            | Monomer               | 99.9                                                | 84.4  | 65.2  | 7.0                                                             | 5.9   | 4.6   |
| P0AB87          | FucA         |                      | Monomer               | 122.9                                               | 103.8 | 80.2  | 11.3                                                            | 9.5   | 7.4   |
|                 |              |                      | Homotetramer          | 71.3                                                | 58.3  | 46.6  | 3.0                                                             | 2.5   | 2.0   |
| P69922          | FucI         | Cytoplasm            | Monomer               | 82.8                                                | 70.0  | 54.1  | 4.4                                                             | 3.7   | 2.9   |
|                 |              |                      | Homoheptamer          | 41.0                                                | 33.5  | 26.8  | 0.6                                                             | 0.5   | 0.4   |
| P11553          | FucK         |                      | Monomer               | 89.6                                                | 75.7  | 58.4  | 5.4                                                             | 4.5   | 3.5   |
| P0A9S1          | FucO         |                      | Monomer               | 99.6                                                | 84.1  | 65.0  | 6.9                                                             | 5.9   | 4.5   |
| P11551          | FucP         | Cell inner membrane  | Monomer               | 93.6                                                | 79.1  | 61.1  | 6.0                                                             | 5.1   | 3.9   |
|                 |              |                      | Complex with SecB     | 65.9                                                | 53.8  | 43.0  | 2.4                                                             | 2.0   | 1.6   |
|                 |              |                      | Complex with TF (Tig) | 71.2                                                | 60.1  | 46.4  | 3.0                                                             | 2.5   | 1.9   |
| P0ACK8          | FucR         |                      | Monomer               | 116.3                                               | 98.2  | 75.9  | 10.0                                                            | 8.4   | 6.5   |
| P0AEN8          | FucU         | Cytoplasm            | Monomer               | 145.4                                               | 122.8 | 94.9  | 16.3                                                            | 13.8  | 10.7  |
|                 |              |                      | Homodecamer           | 59.0                                                | 48.2  | 38.5  | 1.8                                                             | 1.5   | 1.2   |
| P0AC33          | FumA         |                      | Monomer               | 85.3                                                | 72.1  | 55.7  | 4.8                                                             | 4.0   | 3.1   |
|                 |              |                      | Homodimer             | 65.0                                                | 53.1  | 42.4  | 2.3                                                             | 1.9   | 1.5   |
| P14407          | FumB         |                      | Monomer               | 85.4                                                | 72.2  | 55.7  | 4.8                                                             | 4.0   | 3.1   |
|                 |              |                      | Homodimer             | 65.1                                                | 53.2  | 42.5  | 2.3                                                             | 1.9   | 1.5   |
| P05042          | FumC         | Cytoplasm            | Monomer               | 91.4                                                | 77.3  | 59.7  | 5.6                                                             | 4.8   | 3.7   |
|                 |              |                      | Homotetramer          | 53.1                                                | 43.4  | 34.7  | 1.3                                                             | 1.1   | 0.9   |
| P0A9A9          | Fur          | Cytoplasm            | Monomer               | 140.8                                               | 118.9 | 91.9  | 15.2                                                            | 12.9  | 9.9   |
|                 |              |                      | Homodimer             | 107.3                                               | 87.6  | 70.0  | 8.3                                                             | 6.8   | 5.4   |

| UniProtKB A. N. | Protein name | Subcellular location | Subunit               | $D_0 \left( \frac{\mu\text{m}^2}{\text{s}} \right)$ |       |       | $D_{\text{cyto}} \left( \frac{\mu\text{m}^2}{\text{s}} \right)$ |       |       |
|-----------------|--------------|----------------------|-----------------------|-----------------------------------------------------|-------|-------|-----------------------------------------------------------------|-------|-------|
|                 |              |                      |                       | 310 K                                               | 303 K | 293 K | 310 K                                                           | 303 K | 293 K |
| P0A6M8          | FusA         | Cytoplasm            | Monomer               | 77.3                                                | 65.3  | 50.4  | 3.7                                                             | 3.1   | 2.4   |
| P37147          | FxsA         | Cell inner membrane  | Monomer               | 137.9                                               | 116.5 | 90.0  | 14.6                                                            | 12.3  | 9.5   |
|                 |              |                      | Complex with SecB     | 73.9                                                | 60.4  | 48.3  | 3.3                                                             | 2.7   | 2.2   |
|                 |              |                      | Complex with TF (Tig) | 82.4                                                | 69.6  | 53.8  | 4.4                                                             | 3.7   | 2.8   |
| P25526          | GabD         |                      | Monomer               | 90.6                                                | 76.5  | 59.1  | 5.5                                                             | 4.7   | 3.6   |
|                 |              |                      | Homotetramer          | 52.6                                                | 43.0  | 34.3  | 1.3                                                             | 1.1   | 0.8   |
| P25527          | GabP         | Cell inner membrane  | Monomer               | 91.0                                                | 76.9  | 59.4  | 5.6                                                             | 4.7   | 3.6   |
|                 |              |                      | Complex with SecB     | 65.1                                                | 53.2  | 42.5  | 2.3                                                             | 1.9   | 1.5   |
|                 |              |                      | Complex with TF (Tig) | 70.2                                                | 59.3  | 45.8  | 2.9                                                             | 2.4   | 1.9   |
| P22256          | GabT         |                      | Monomer               | 95.0                                                | 80.3  | 62.0  | 6.2                                                             | 5.2   | 4.0   |
|                 |              |                      | Homotetramer          | 55.2                                                | 45.1  | 36.0  | 1.5                                                             | 1.2   | 1.0   |
| P69908          | GadA         |                      | Monomer               | 89.9                                                | 76.0  | 58.7  | 5.4                                                             | 4.6   | 3.5   |
|                 |              |                      | Homoheptamer          | 44.6                                                | 36.4  | 29.1  | 0.8                                                             | 0.6   | 0.5   |
| P69910          | GadB         | Cytoplasm Membrane   | Monomer               | 89.9                                                | 76.0  | 58.7  | 5.4                                                             | 4.6   | 3.5   |
|                 |              |                      | Homoheptamer          | 44.6                                                | 36.4  | 29.1  | 0.8                                                             | 0.6   | 0.5   |
| P63235          | GadC         | Cell inner membrane  | Monomer               | 88.4                                                | 74.7  | 57.7  | 5.2                                                             | 4.4   | 3.4   |
|                 |              |                      | Complex with SecB     | 64.3                                                | 52.5  | 41.9  | 2.3                                                             | 1.9   | 1.5   |
|                 |              |                      | Complex with TF (Tig) | 69.1                                                | 58.4  | 45.1  | 2.8                                                             | 2.3   | 1.8   |
| P63204          | GadE         |                      | Monomer               | 130.0                                               | 109.8 | 84.8  | 12.8                                                            | 10.8  | 8.4   |
| P63201          | GadW         |                      | Monomer               | 115.2                                               | 97.3  | 75.2  | 9.8                                                             | 8.2   | 6.4   |
|                 |              |                      | Homodimer             | 87.8                                                | 71.7  | 57.3  | 5.1                                                             | 4.2   | 3.3   |
| P37639          | GadX         |                      | Monomer               | 109.9                                               | 92.9  | 71.7  | 8.8                                                             | 7.4   | 5.7   |
|                 |              |                      | Homodimer             | 83.8                                                | 68.4  | 54.7  | 4.5                                                             | 3.7   | 3.0   |
| P09147          | GalE         |                      | Monomer               | 103.0                                               | 87.0  | 67.2  | 7.5                                                             | 6.4   | 4.9   |
|                 |              |                      | Homodimer             | 78.5                                                | 64.1  | 51.2  | 3.8                                                             | 3.1   | 2.5   |
| P0AAB6          | GalF         |                      | Monomer               | 108.3                                               | 91.5  | 70.6  | 8.5                                                             | 7.1   | 5.5   |
| P0A6T3          | GalK         | Cytoplasm            | Monomer               | 98.8                                                | 83.5  | 64.5  | 6.8                                                             | 5.8   | 4.4   |
| P0A9C3          | GalM         | Cytoplasm            | Monomer               | 102.0                                               | 86.2  | 66.6  | 7.4                                                             | 6.2   | 4.8   |
| P0AEP1          | GalP         | Cell inner membrane  | Monomer               | 91.1                                                | 77.0  | 59.4  | 5.6                                                             | 4.7   | 3.6   |
|                 |              |                      | Complex with SecB     | 65.1                                                | 53.2  | 42.5  | 2.3                                                             | 1.9   | 1.5   |
|                 |              |                      | Complex with TF (Tig) | 70.2                                                | 59.3  | 45.8  | 2.9                                                             | 2.4   | 1.9   |

| UniProtKB A. N. | Protein name | Subcellular location | Subunit               | $D_0 \left( \frac{\mu\text{m}^2}{\text{s}} \right)$ |       |       | $D_{\text{cyto}} \left( \frac{\mu\text{m}^2}{\text{s}} \right)$ |       |       |
|-----------------|--------------|----------------------|-----------------------|-----------------------------------------------------|-------|-------|-----------------------------------------------------------------|-------|-------|
|                 |              |                      |                       | 310 K                                               | 303 K | 293 K | 310 K                                                           | 303 K | 293 K |
| P03024          | GalR         |                      | Monomer               | 103.2                                               | 87.2  | 67.3  | 7.6                                                             | 6.4   | 4.9   |
|                 |              |                      | Homodimer             | 78.6                                                | 64.2  | 51.3  | 3.9                                                             | 3.2   | 2.5   |
| P25748          | GalS         |                      | Monomer               | 102.9                                               | 86.9  | 67.2  | 7.5                                                             | 6.3   | 4.9   |
|                 |              |                      | Homodimer             | 78.4                                                | 64.1  | 51.2  | 3.8                                                             | 3.1   | 2.5   |
| P09148          | GalT         |                      | Monomer               | 100.5                                               | 84.9  | 65.6  | 7.1                                                             | 6.0   | 4.6   |
|                 |              |                      | Homodimer             | 76.6                                                | 62.6  | 50.0  | 3.6                                                             | 3.0   | 2.4   |
| P0AEP3          | GalU         |                      | Monomer               | 108.1                                               | 91.3  | 70.5  | 8.4                                                             | 7.1   | 5.5   |
|                 |              |                      | Homotetramer          | 62.8                                                | 51.3  | 41.0  | 2.1                                                             | 1.7   | 1.4   |
|                 |              |                      | Homopentamer          | 57.5                                                | 48.6  | 37.5  | 1.7                                                             | 1.4   | 1.1   |
| P0A9B2          | GapA         | Cytoplasm            | Monomer               | 105.0                                               | 88.7  | 68.5  | 7.9                                                             | 6.6   | 5.1   |
|                 |              |                      | Homotetramer          | 61.0                                                | 49.8  | 39.8  | 2.0                                                             | 1.6   | 1.3   |
| P33898          | GapC         | Cytoplasm            | Monomer               | 104.8                                               | 88.5  | 68.4  | 7.8                                                             | 6.6   | 5.1   |
|                 |              |                      | Homotetramer          | 60.9                                                | 49.7  | 39.7  | 2.0                                                             | 1.6   | 1.3   |
| P39829          | GarD         |                      | Monomer               | 87.6                                                | 74.0  | 57.1  | 5.1                                                             | 4.3   | 3.3   |
| P23524          | GarK         |                      | Monomer               | 101.1                                               | 85.4  | 66.0  | 7.2                                                             | 6.1   | 4.7   |
| P23522          | GarL         |                      | Monomer               | 116.2                                               | 98.2  | 75.8  | 10.0                                                            | 8.4   | 6.5   |
|                 |              |                      | Homoheptamer          | 57.6                                                | 47.0  | 37.6  | 1.7                                                             | 1.4   | 1.1   |
| P0AA80          | GarP         | Cell inner membrane  | Monomer               | 92.5                                                | 78.2  | 60.4  | 5.8                                                             | 4.9   | 3.8   |
|                 |              |                      | Complex with SecB     | 65.5                                                | 53.5  | 42.8  | 2.4                                                             | 2.0   | 1.6   |
|                 |              |                      | Complex with TF (Tig) | 70.7                                                | 59.8  | 46.2  | 2.9                                                             | 2.5   | 1.9   |
| P0ABQ2          | GarR         |                      | Monomer               | 111.5                                               | 94.2  | 72.8  | 9.1                                                             | 7.7   | 5.9   |
| P69828          | GatA         | Cytoplasm            | Monomer               | 140.4                                               | 118.6 | 91.6  | 15.2                                                            | 12.8  | 9.9   |
| P37188          | GatB         | Cytoplasm            | Monomer               | 171.0                                               | 144.5 | 111.6 | 23.0                                                            | 19.4  | 15.0  |
| P69831          | GatC         | Cell inner membrane  | Monomer               | 93.0                                                | 78.6  | 60.7  | 5.9                                                             | 5.0   | 3.8   |
|                 |              |                      | Complex with SecB     | 65.7                                                | 53.7  | 42.9  | 2.4                                                             | 2.0   | 1.6   |
|                 |              |                      | Complex with TF (Tig) | 70.9                                                | 59.9  | 46.3  | 3.0                                                             | 2.5   | 1.9   |
| P0A9S3          | GatD         |                      | Monomer               | 102.9                                               | 86.9  | 67.1  | 7.5                                                             | 6.3   | 4.9   |
| P36930          | GatR         |                      | Monomer               | 115.3                                               | 97.4  | 75.2  | 9.8                                                             | 8.3   | 6.4   |
| POC8J6          | GatY         |                      | Monomer               | 111.0                                               | 93.8  | 72.4  | 9.0                                                             | 7.6   | 5.8   |
| POC8J8          | GatZ         |                      | Monomer               | 94.0                                                | 79.4  | 61.3  | 6.0                                                             | 5.1   | 3.9   |
| P15877          | Gcd          | Cell inner membrane  | Monomer               | 74.0                                                | 62.5  | 48.3  | 3.3                                                             | 2.8   | 2.2   |



| UniProtKB A. N. | Protein name | Subcellular location | Subunit               | $D_0 \left( \frac{\mu\text{m}^2}{\text{s}} \right)$ |       |       | $D_{\text{cyto}} \left( \frac{\mu\text{m}^2}{\text{s}} \right)$ |       |       |
|-----------------|--------------|----------------------|-----------------------|-----------------------------------------------------|-------|-------|-----------------------------------------------------------------|-------|-------|
|                 |              |                      |                       | 310 K                                               | 303 K | 293 K | 310 K                                                           | 303 K | 293 K |
|                 |              |                      | Complex with SecB     | 58.8                                                | 48.0  | 38.4  | 1.8                                                             | 1.4   | 1.2   |
|                 |              |                      | Complex with TF (Tig) | 62.2                                                | 52.6  | 40.6  | 2.1                                                             | 1.8   | 1.4   |
| P0AEP7          | Gcl          |                      | Monomer               | 83.0                                                | 70.1  | 54.1  | 4.4                                                             | 3.7   | 2.9   |
|                 |              |                      | Homotetramer          | 48.2                                                | 39.4  | 31.4  | 1.0                                                             | 0.8   | 0.6   |
| P05852          | Gcp          | Cytoplasm            | Monomer               | 104.4                                               | 88.2  | 68.1  | 7.8                                                             | 6.6   | 5.1   |
| P0A9F6          | GcvA         | Cytoplasm            | Monomer               | 106.3                                               | 89.8  | 69.4  | 8.1                                                             | 6.8   | 5.3   |
| P0A6T9          | GcvH         |                      | Monomer               | 152.0                                               | 128.4 | 99.2  | 18.0                                                            | 15.2  | 11.7  |
| P33195          | GcvP         |                      | Monomer               | 68.8                                                | 58.1  | 44.9  | 2.7                                                             | 2.3   | 1.8   |
| P0A9I3          | GcvR         | Cytoplasm            | Monomer               | 129.5                                               | 109.4 | 84.5  | 12.7                                                            | 10.7  | 8.3   |
| P27248          | GcvT         |                      | Monomer               | 100.0                                               | 84.5  | 65.3  | 7.0                                                             | 5.9   | 4.6   |
|                 |              |                      | Monomer               | 92.8                                                | 78.4  | 60.6  | 5.9                                                             | 4.9   | 3.8   |
| P00370          | GdhA         |                      | Homo-hexamers         | 46.0                                                | 37.6  | 30.0  | 0.9                                                             | 0.7   | 0.6   |
|                 |              |                      | Monomer               | 176.0                                               | 148.7 | 114.8 | 24.3                                                            | 20.6  | 15.9  |
| P75885          | GfcA         | Cell inner membrane  | Complex with SecB     | 76.9                                                | 62.8  | 50.2  | 3.6                                                             | 3.0   | 2.4   |
|                 |              |                      | Complex with TF (Tig) | 86.8                                                | 73.3  | 56.6  | 5.0                                                             | 4.2   | 3.2   |
|                 |              |                      | Monomer               | 121.9                                               | 103.0 | 79.5  | 11.1                                                            | 9.4   | 7.2   |
| P75884          | GfcB         | Cell membrane        | Complex with SecB     | 71.9                                                | 58.7  | 46.9  | 3.1                                                             | 2.5   | 2.0   |
|                 |              |                      | Complex with TF (Tig) | 79.4                                                | 67.1  | 51.8  | 4.0                                                             | 3.3   | 2.6   |
| P75883          | GfcC         |                      | Monomer               | 116.4                                               | 98.3  | 75.9  | 10.0                                                            | 8.4   | 6.5   |
|                 |              |                      | Monomer               | 76.8                                                | 64.9  | 50.1  | 3.6                                                             | 3.1   | 2.4   |
| P75882          | GfcD         | Cell membrane        | Complex with SecB     | 60.0                                                | 49.0  | 39.2  | 1.9                                                             | 1.5   | 1.2   |
|                 |              |                      | Complex with TF (Tig) | 63.7                                                | 53.8  | 41.6  | 2.2                                                             | 1.9   | 1.4   |
|                 |              |                      | Monomer               | 98.5                                                | 83.2  | 64.3  | 6.8                                                             | 5.7   | 4.4   |
| P0A932          | GfcE         | Cell outer membrane  | Complex with SecB     | 67.2                                                | 54.9  | 43.8  | 2.6                                                             | 2.1   | 1.7   |
|                 |              |                      | Complex with TF (Tig) | 72.9                                                | 61.6  | 47.6  | 3.2                                                             | 2.7   | 2.1   |
|                 |              |                      | Monomer               | 84.5                                                | 71.4  | 55.1  | 4.6                                                             | 3.9   | 3.0   |
| P18956          | Ggt          | Periplasm            | Complex with SecB     | 63.0                                                | 51.4  | 41.1  | 2.1                                                             | 1.7   | 1.4   |
|                 |              |                      | Complex with TF (Tig) | 67.4                                                | 56.9  | 44.0  | 2.6                                                             | 2.2   | 1.7   |
| P75913          | GhrA         | Cytoplasm            | Monomer               | 105.2                                               | 88.9  | 68.6  | 7.9                                                             | 6.7   | 5.2   |
|                 |              |                      | Monomer               | 105.1                                               | 88.8  | 68.6  | 7.9                                                             | 6.7   | 5.1   |
| P37666          | GhrB         | Cytoplasm            | Homodimer             | 80.1                                                | 65.4  | 52.3  | 4.1                                                             | 3.3   | 2.6   |

| UniProtKB A. N. | Protein name | Subcellular location | Subunit               | $D_0 \left( \frac{\mu\text{m}^2}{\text{s}} \right)$ |       |       | $D_{\text{cyto}} \left( \frac{\mu\text{m}^2}{\text{s}} \right)$ |       |       |
|-----------------|--------------|----------------------|-----------------------|-----------------------------------------------------|-------|-------|-----------------------------------------------------------------|-------|-------|
|                 |              |                      |                       | 310 K                                               | 303 K | 293 K | 310 K                                                           | 303 K | 293 K |
| Q46839          | GlcA         | Cell inner membrane  | Monomer               | 86.1                                                | 72.7  | 56.2  | 4.9                                                             | 4.1   | 3.2   |
|                 |              |                      | Complex with SecB     | 63.5                                                | 51.9  | 41.4  | 2.2                                                             | 1.8   | 1.4   |
|                 |              |                      | Complex with TF (Tig) | 68.1                                                | 57.5  | 44.4  | 2.7                                                             | 2.2   | 1.7   |
| P37330          | GlcB         | Cytoplasm            | Monomer               | 76.2                                                | 64.3  | 49.7  | 3.6                                                             | 3.0   | 2.3   |
| P0ACL5          | GlcC         |                      | Monomer               | 113.9                                               | 96.2  | 74.3  | 9.5                                                             | 8.0   | 6.2   |
| P0AEP9          | GlcD         |                      | Monomer               | 89.2                                                | 75.4  | 58.2  | 5.3                                                             | 4.5   | 3.5   |
| P52073          | GlcE         |                      | Monomer               | 101.8                                               | 86.0  | 66.5  | 7.3                                                             | 6.2   | 4.8   |
| P52074          | GlcF         |                      | Monomer               | 95.6                                                | 80.7  | 62.4  | 6.3                                                             | 5.3   | 4.1   |
| P0AEQ1          | GlcG         |                      | Monomer               | 152.3                                               | 128.7 | 99.4  | 18.0                                                            | 15.2  | 11.8  |
| P0A9S5          | GldA         |                      | Monomer               | 101.5                                               | 85.7  | 66.2  | 7.3                                                             | 6.1   | 4.7   |
|                 |              |                      | Homodimer             | 77.3                                                | 63.2  | 50.5  | 3.7                                                             | 3.0   | 2.4   |
|                 |              |                      | Homooctamer           | 44.9                                                | 37.9  | 29.3  | 0.8                                                             | 0.7   | 0.5   |
| P37747          | Glf          |                      | Monomer               | 97.4                                                | 82.3  | 63.6  | 6.6                                                             | 5.6   | 4.3   |
| P0A6U8          | GlgA         |                      | Monomer               | 89.8                                                | 75.9  | 58.6  | 5.4                                                             | 4.6   | 3.5   |
| P07762          | GlgB         |                      | Monomer               | 74.8                                                | 63.2  | 48.8  | 3.4                                                             | 2.9   | 2.2   |
| P0A6V1          | GlgC         |                      | Monomer               | 92.8                                                | 78.4  | 60.5  | 5.8                                                             | 4.9   | 3.8   |
|                 |              |                      | Homotetramer          | 53.9                                                | 44.0  | 35.2  | 1.4                                                             | 1.1   | 0.9   |
| P0AC86          | GlgP         |                      | Monomer               | 71.9                                                | 60.8  | 46.9  | 3.1                                                             | 2.6   | 2.0   |
| P26649          | GlgS         |                      | Monomer               | 189.3                                               | 159.9 | 123.5 | 28.2                                                            | 23.8  | 18.4  |
| P15067          | GlgX         |                      | Monomer               | 78.9                                                | 66.7  | 51.5  | 3.9                                                             | 3.3   | 2.5   |
| P0A6V8          | Glk          | Cytoplasm            | Monomer               | 105.9                                               | 89.5  | 69.1  | 8.0                                                             | 6.8   | 5.2   |
| P31120          | GlmM         |                      | Monomer               | 93.6                                                | 79.1  | 61.1  | 6.0                                                             | 5.1   | 3.9   |
| P17169          | GlmS         | Cytoplasm            | Monomer               | 81.9                                                | 69.2  | 53.4  | 4.3                                                             | 3.6   | 2.8   |
|                 |              |                      | Homodimer             | 62.4                                                | 51.0  | 40.7  | 2.1                                                             | 1.7   | 1.4   |
| P0ACC7          | GlmU         | Cytoplasm            | Monomer               | 92.4                                                | 78.1  | 60.3  | 5.8                                                             | 4.9   | 3.8   |
|                 |              |                      | Homotrimer            | 60.1                                                | 49.1  | 39.2  | 1.9                                                             | 1.5   | 1.2   |
|                 |              |                      | Homohexamer           | 45.8                                                | 38.7  | 29.9  | 0.9                                                             | 0.7   | 0.6   |
| P0A9C5          | GlnA         | Cytoplasm            | Monomer               | 90.5                                                | 76.4  | 59.0  | 5.5                                                             | 4.6   | 3.6   |
| P0A9Z1          | GlnB         |                      | Monomer               | 158.4                                               | 133.9 | 103.4 | 19.6                                                            | 16.6  | 12.8  |
|                 |              |                      | Homotrimer            | 103.0                                               | 84.1  | 67.2  | 7.5                                                             | 6.1   | 4.9   |
| P27249          | GlnD         |                      | Monomer               | 69.3                                                | 58.6  | 45.2  | 2.8                                                             | 2.3   | 1.8   |

| UniProtKB A. N. | Protein name | Subcellular location | Subunit               | $D_0 \left( \frac{\mu\text{m}^2}{\text{s}} \right)$ |       |       | $D_{\text{cyto}} \left( \frac{\mu\text{m}^2}{\text{s}} \right)$ |       |       |
|-----------------|--------------|----------------------|-----------------------|-----------------------------------------------------|-------|-------|-----------------------------------------------------------------|-------|-------|
|                 |              |                      |                       | 310 K                                               | 303 K | 293 K | 310 K                                                           | 303 K | 293 K |
| P30870          | GlnE         |                      | Monomer               | 67.8                                                | 57.3  | 44.2  | 2.6                                                             | 2.2   | 1.7   |
| P0AFB8          | GlnG         |                      | Monomer               | 90.2                                                | 76.2  | 58.9  | 5.5                                                             | 4.6   | 3.6   |
| P0AEQ3          | GlnH         | Periplasm            | Monomer               | 116.6                                               | 98.5  | 76.1  | 10.0                                                            | 8.5   | 6.5   |
|                 |              |                      | Complex with SecB     | 71.0                                                | 58.0  | 46.3  | 3.0                                                             | 2.4   | 1.9   |
|                 |              |                      | Complex with TF (Tig) | 78.2                                                | 66.0  | 51.0  | 3.8                                                             | 3.2   | 2.5   |
| P0AC55          | GlnK         |                      | Monomer               | 159.3                                               | 134.6 | 103.9 | 19.8                                                            | 16.7  | 12.9  |
|                 |              |                      | Homotrimer            | 103.5                                               | 84.6  | 67.6  | 7.6                                                             | 6.2   | 5.0   |
| P0AFB5          | GlnL         |                      | Monomer               | 101.6                                               | 85.9  | 66.3  | 7.3                                                             | 6.2   | 4.8   |
| P0AEQ6          | GlnP         | Cell inner membrane  | Monomer               | 121.7                                               | 102.8 | 79.4  | 11.0                                                            | 9.3   | 7.2   |
|                 |              |                      | Complex with SecB     | 71.8                                                | 58.7  | 46.9  | 3.1                                                             | 2.5   | 2.0   |
|                 |              |                      | Complex with TF (Tig) | 79.3                                                | 67.0  | 51.8  | 4.0                                                             | 3.3   | 2.6   |
| P10346          | GlnQ         | Cell inner membrane  | Monomer               | 117.3                                               | 99.1  | 76.6  | 10.2                                                            | 8.6   | 6.6   |
|                 |              |                      | Complex with SecB     | 71.1                                                | 58.1  | 46.4  | 3.0                                                             | 2.4   | 1.9   |
|                 |              |                      | Complex with TF (Tig) | 78.3                                                | 66.2  | 51.1  | 3.8                                                             | 3.2   | 2.5   |
| P00962          | GlnS         | Cytoplasm            | Monomer               | 83.6                                                | 70.6  | 54.6  | 4.5                                                             | 3.8   | 2.9   |
| P0AC81          | GloA         |                      | Monomer               | 147.5                                               | 124.6 | 96.2  | 16.8                                                            | 14.2  | 11.0  |
|                 |              |                      | Homodimer             | 112.4                                               | 91.8  | 73.3  | 9.2                                                             | 7.5   | 6.0   |
| P0AC84          | GloB         |                      | Monomer               | 114.5                                               | 96.8  | 74.7  | 9.6                                                             | 8.1   | 6.3   |
| P0A9C0          | GlpA         | Cell inner membrane  | Monomer               | 86.1                                                | 72.7  | 56.2  | 4.9                                                             | 4.1   | 3.2   |
|                 |              |                      | Complex with SecB     | 63.5                                                | 51.9  | 41.4  | 2.2                                                             | 1.8   | 1.4   |
|                 |              |                      | Complex with TF (Tig) | 68.1                                                | 57.5  | 44.4  | 2.6                                                             | 2.2   | 1.7   |
| P13033          | GlpB         | Cell inner membrane  | Monomer               | 95.4                                                | 80.6  | 62.2  | 6.3                                                             | 5.3   | 4.1   |
|                 |              |                      | Complex with SecB     | 66.3                                                | 54.2  | 43.3  | 2.5                                                             | 2.0   | 1.6   |
|                 |              |                      | Complex with TF (Tig) | 71.8                                                | 60.7  | 46.9  | 3.1                                                             | 2.6   | 2.0   |
| P0A996          | GlpC         | Cell inner membrane  | Monomer               | 96.4                                                | 81.5  | 62.9  | 6.4                                                             | 5.4   | 4.2   |
|                 |              |                      | Complex with SecB     | 66.6                                                | 54.4  | 43.5  | 2.5                                                             | 2.0   | 1.6   |
|                 |              |                      | Complex with TF (Tig) | 72.2                                                | 61.0  | 47.1  | 3.1                                                             | 2.6   | 2.0   |
| P13035          | GlpD         | Cytoplasm            | Monomer               | 87.4                                                | 73.8  | 57.0  | 5.0                                                             | 4.3   | 3.3   |
| P0A6V5          | GlpE         | Cytoplasm            | Monomer               | 160.2                                               | 135.3 | 104.5 | 20.1                                                            | 16.9  | 13.1  |
|                 |              |                      | Homodimer             | 122.1                                               | 99.7  | 79.7  | 11.1                                                            | 9.1   | 7.3   |
| P0AER0          | GlpF         | Cell inner membrane  | Monomer               | 112.5                                               | 95.0  | 73.4  | 9.2                                                             | 7.8   | 6.0   |

| UniProtKB A. N. | Protein name | Subcellular location | Subunit                                   | $D_0 \left( \frac{\mu\text{m}^2}{\text{s}} \right)$ |       |       | $D_{\text{cyto}} \left( \frac{\mu\text{m}^2}{\text{s}} \right)$ |       |       |
|-----------------|--------------|----------------------|-------------------------------------------|-----------------------------------------------------|-------|-------|-----------------------------------------------------------------|-------|-------|
|                 |              |                      |                                           | 310 K                                               | 303 K | 293 K | 310 K                                                           | 303 K | 293 K |
|                 |              |                      | Complex with SecB                         | 70.3                                                | 57.4  | 45.9  | 2.9                                                             | 2.4   | 1.9   |
|                 |              |                      | Complex with TF (Tig)                     | 77.1                                                | 65.2  | 50.3  | 3.7                                                             | 3.1   | 2.4   |
| P09391          | GlpG         | Cell inner membrane  | Monomer                                   | 110.3                                               | 93.2  | 72.0  | 8.8                                                             | 7.5   | 5.8   |
|                 |              |                      | Complex with SecB                         | 69.8                                                | 57.1  | 45.6  | 2.8                                                             | 2.3   | 1.9   |
|                 |              |                      | Complex with TF (Tig)                     | 76.5                                                | 64.7  | 49.9  | 3.6                                                             | 3.0   | 2.4   |
| P0A6F3          | GlpK         |                      | Monomer                                   | 87.7                                                | 74.1  | 57.2  | 5.1                                                             | 4.3   | 3.3   |
|                 |              |                      | Homotetramer                              | 50.9                                                | 41.6  | 33.2  | 1.2                                                             | 1.0   | 0.8   |
|                 |              |                      | Heterodimer (Crr–GlpK)                    | 78.5                                                | 66.3  | 51.2  | 3.9                                                             | 3.3   | 2.5   |
| P09394          | GlpQ         | Periplasm            | Monomer                                   | 99.4                                                | 84.0  | 64.8  | 6.9                                                             | 5.8   | 4.5   |
|                 |              |                      | Complex with SecB                         | 67.4                                                | 55.1  | 44.0  | 2.6                                                             | 2.1   | 1.7   |
|                 |              |                      | Complex with TF (Tig)                     | 73.2                                                | 61.9  | 47.8  | 3.2                                                             | 2.7   | 2.1   |
| P0ACL0          | GlpR         |                      | Monomer                                   | 115.1                                               | 97.3  | 75.1  | 9.7                                                             | 8.2   | 6.4   |
| P08194          | GlpT         | Cell inner membrane  | Monomer                                   | 91.6                                                | 77.4  | 59.8  | 5.7                                                             | 4.8   | 3.7   |
|                 |              |                      | Complex with SecB                         | 65.3                                                | 53.3  | 42.6  | 2.4                                                             | 1.9   | 1.5   |
|                 |              |                      | Complex with TF (Tig)                     | 70.4                                                | 59.5  | 45.9  | 2.9                                                             | 2.4   | 1.9   |
| P0A9C9          | GlpX         | Cytoplasm            | Monomer                                   | 104.6                                               | 88.4  | 68.2  | 7.8                                                             | 6.6   | 5.1   |
|                 |              |                      | Homodimer                                 | 79.7                                                | 65.1  | 52.0  | 4.0                                                             | 3.3   | 2.6   |
| P77454          | GlsA1        |                      | Monomer                                   | 108.2                                               | 91.4  | 70.6  | 8.4                                                             | 7.1   | 5.5   |
| P0A6W0          | GlsA2        |                      | Monomer                                   | 107.4                                               | 90.7  | 70.1  | 8.3                                                             | 7.0   | 5.4   |
| P0ABH7          | GltA         |                      | Monomer                                   | 93.3                                                | 78.8  | 60.9  | 5.9                                                             | 5.0   | 3.9   |
|                 |              |                      | Homohexamer                               | 46.2                                                | 37.7  | 30.2  | 0.9                                                             | 0.7   | 0.6   |
| P09831          | GltB         |                      | Monomer                                   | 57.7                                                | 48.8  | 37.7  | 1.7                                                             | 1.4   | 1.1   |
|                 |              |                      | Heterooctamer ((GltB–GltD) <sub>4</sub> ) | 30.1                                                | 25.4  | 19.6  | 0.2                                                             | 0.2   | 0.1   |
| P09832          | GltD         |                      | Monomer                                   | 90.4                                                | 76.4  | 59.0  | 5.5                                                             | 4.6   | 3.6   |
|                 |              |                      | Heterooctamer ((GltB–GltD) <sub>4</sub> ) | 30.1                                                | 25.4  | 19.6  | 0.2                                                             | 0.2   | 0.1   |
| P28721          | GltF         | Cell membrane        | Monomer                                   | 118.0                                               | 99.7  | 77.0  | 10.3                                                            | 8.7   | 6.7   |
|                 |              |                      | Complex with SecB                         | 71.2                                                | 58.2  | 46.5  | 3.0                                                             | 2.4   | 2.0   |
|                 |              |                      | Complex with TF (Tig)                     | 78.5                                                | 66.3  | 51.2  | 3.8                                                             | 3.3   | 2.5   |
| P37902          | GltI         | Periplasm            | Monomer                                   | 107.5                                               | 90.8  | 70.2  | 8.3                                                             | 7.0   | 5.4   |
|                 |              |                      | Complex with SecB                         | 69.3                                                | 56.6  | 45.2  | 2.8                                                             | 2.3   | 1.8   |
|                 |              |                      | Complex with TF (Tig)                     | 75.8                                                | 64.0  | 49.4  | 3.5                                                             | 3.0   | 2.3   |

| UniProtKB A. N. | Protein name | Subcellular location | Subunit               | $D_0 \left( \frac{\mu\text{m}^2}{\text{s}} \right)$ |       |       | $D_{\text{cyto}} \left( \frac{\mu\text{m}^2}{\text{s}} \right)$ |       |       |
|-----------------|--------------|----------------------|-----------------------|-----------------------------------------------------|-------|-------|-----------------------------------------------------------------|-------|-------|
|                 |              |                      |                       | 310 K                                               | 303 K | 293 K | 310 K                                                           | 303 K | 293 K |
| P0AER3          | GltJ         | Cell inner membrane  | Monomer               | 116.0                                               | 98.0  | 75.7  | 9.9                                                             | 8.4   | 6.5   |
|                 |              |                      | Complex with SecB     | 70.9                                                | 57.9  | 46.3  | 3.0                                                             | 2.4   | 1.9   |
|                 |              |                      | Complex with TF (Tig) | 78.0                                                | 65.9  | 50.9  | 3.8                                                             | 3.2   | 2.5   |
| P0AER5          | GltK         | Cell inner membrane  | Monomer               | 120.6                                               | 101.9 | 78.7  | 10.8                                                            | 9.2   | 7.1   |
|                 |              |                      | Complex with SecB     | 71.7                                                | 58.5  | 46.8  | 3.0                                                             | 2.5   | 2.0   |
|                 |              |                      | Complex with TF (Tig) | 79.1                                                | 66.8  | 51.6  | 3.9                                                             | 3.3   | 2.6   |
| P0AAG3          | GltL         | Cell inner membrane  | Monomer               | 117.5                                               | 99.2  | 76.6  | 10.2                                                            | 8.6   | 6.7   |
|                 |              |                      | Complex with SecB     | 71.2                                                | 58.1  | 46.4  | 3.0                                                             | 2.4   | 1.9   |
|                 |              |                      | Complex with TF (Tig) | 78.4                                                | 66.2  | 51.1  | 3.8                                                             | 3.2   | 2.5   |
| P21345          | GltP         | Cell inner membrane  | Monomer               | 93.9                                                | 79.4  | 61.3  | 6.0                                                             | 5.1   | 3.9   |
|                 |              |                      | Complex with SecB     | 65.9                                                | 53.9  | 43.0  | 2.4                                                             | 2.0   | 1.6   |
|                 |              |                      | Complex with TF (Tig) | 71.3                                                | 60.2  | 46.5  | 3.0                                                             | 2.5   | 2.0   |
| P0AER8          | GltS         | Cell inner membrane  | Monomer               | 97.9                                                | 82.7  | 63.9  | 6.7                                                             | 5.6   | 4.3   |
|                 |              |                      | Complex with SecB     | 67.0                                                | 54.8  | 43.7  | 2.5                                                             | 2.1   | 1.7   |
|                 |              |                      | Complex with TF (Tig) | 72.7                                                | 61.4  | 47.4  | 3.2                                                             | 2.7   | 2.1   |
| P04805          | GltX         | Cytoplasm            | Monomer               | 89.2                                                | 75.3  | 58.2  | 5.3                                                             | 4.5   | 3.5   |
| P27305          | GluQ         |                      | Monomer               | 105.7                                               | 89.3  | 69.0  | 8.0                                                             | 6.8   | 5.2   |
| P69789          | GlvB         | Cell membrane        | Monomer               | 138.1                                               | 116.7 | 90.1  | 14.6                                                            | 12.4  | 9.5   |
|                 |              |                      | Complex with SecB     | 74.0                                                | 60.4  | 48.3  | 3.3                                                             | 2.7   | 2.2   |
|                 |              |                      | Complex with TF (Tig) | 82.4                                                | 69.6  | 53.8  | 4.4                                                             | 3.7   | 2.8   |
| P31452          | GlvC         | Cell inner membrane  | Monomer               | 100.5                                               | 84.9  | 65.6  | 7.1                                                             | 6.0   | 4.6   |
|                 |              |                      | Complex with SecB     | 67.7                                                | 55.3  | 44.2  | 2.6                                                             | 2.1   | 1.7   |
|                 |              |                      | Complex with TF (Tig) | 73.6                                                | 62.2  | 48.0  | 3.3                                                             | 2.8   | 2.1   |
| P31450          | GlvG         |                      | Monomer               | 123.0                                               | 103.9 | 80.2  | 11.3                                                            | 9.6   | 7.4   |
| P77364          | GlxK         |                      | Monomer               | 101.5                                               | 85.7  | 66.2  | 7.3                                                             | 6.1   | 4.7   |
| P77161          | GlxR         |                      | Monomer               | 111.0                                               | 93.8  | 72.4  | 9.0                                                             | 7.6   | 5.8   |
| P0A825          | GlyA         | Cytoplasm            | Monomer               | 95.4                                                | 80.6  | 62.3  | 6.3                                                             | 5.3   | 4.1   |
|                 |              |                      | Homotetramer          | 55.4                                                | 45.3  | 36.2  | 1.5                                                             | 1.2   | 1.0   |
| P00960          | GlyQ         | Cytoplasm            | Monomer               | 105.8                                               | 89.4  | 69.1  | 8.0                                                             | 6.8   | 5.2   |
| P00961          | GlyS         | Cytoplasm            | Monomer               | 77.6                                                | 65.5  | 50.6  | 3.7                                                             | 3.2   | 2.4   |
| P0AC88          | Gmd          |                      | Monomer               | 98.2                                                | 83.0  | 64.1  | 6.7                                                             | 5.7   | 4.4   |

| UniProtKB A. N. | Protein name | Subcellular location | Subunit               | $D_0 \left( \frac{\mu\text{m}^2}{\text{s}} \right)$ |       |       | $D_{\text{cyto}} \left( \frac{\mu\text{m}^2}{\text{s}} \right)$ |       |       |  |
|-----------------|--------------|----------------------|-----------------------|-----------------------------------------------------|-------|-------|-----------------------------------------------------------------|-------|-------|--|
|                 |              |                      |                       | 310 K                                               | 303 K | 293 K | 310 K                                                           | 303 K | 293 K |  |
|                 |              |                      | Homodimer             | 74.9                                                | 61.2  | 48.9  | 3.4                                                             | 2.8   | 2.2   |  |
| P63224          | GmhA         | Cytoplasm            | Monomer               | 129.4                                               | 109.3 | 84.5  | 12.7                                                            | 10.7  | 8.3   |  |
|                 |              |                      | Homotetramer          | 75.2                                                | 61.4  | 49.0  | 3.4                                                             | 2.8   | 2.2   |  |
|                 |              |                      |                       |                                                     |       |       |                                                                 |       |       |  |
| P63228          | GmhB         | Cytoplasm            | Monomer               | 128.3                                               | 108.4 | 83.7  | 12.4                                                            | 10.5  | 8.1   |  |
|                 |              |                      |                       |                                                     |       |       |                                                                 |       |       |  |
|                 |              |                      |                       |                                                     |       |       |                                                                 |       |       |  |
| P60546          | Gmk          | Cytoplasm            | Monomer               | 123.2                                               | 104.1 | 80.4  | 11.4                                                            | 9.6   | 7.4   |  |
|                 |              |                      | Homodimer             | 93.9                                                | 76.7  | 61.3  | 6.0                                                             | 4.9   | 3.9   |  |
|                 |              |                      | Homotetramer          | 71.6                                                | 60.5  | 46.7  | 3.0                                                             | 2.6   | 2.0   |  |
| P77334          | Gmr          |                      | Monomer               | 78.4                                                | 66.3  | 51.2  | 3.8                                                             | 3.2   | 2.5   |  |
| P00350          | Gnd          |                      | Monomer               | 90.8                                                | 76.7  | 59.2  | 5.5                                                             | 4.7   | 3.6   |  |
|                 |              |                      | Homodimer             | 69.2                                                | 56.5  | 45.1  | 2.8                                                             | 2.3   | 1.8   |  |
| P0AC92          | GnsA         |                      | Monomer               | 203.3                                               | 171.8 | 132.7 | 32.5                                                            | 27.5  | 21.2  |  |
| P77695          | GnsB         |                      | Monomer               | 203.7                                               | 172.1 | 132.9 | 32.6                                                            | 27.5  | 21.3  |  |
| P46859          | GntK         |                      | Monomer               | 132.7                                               | 112.1 | 86.6  | 13.4                                                            | 11.3  | 8.7   |  |
| P0AC94          | GntP         | Cell inner membrane  | Monomer               | 93.9                                                | 79.4  | 61.3  | 6.0                                                             | 5.1   | 3.9   |  |
|                 |              |                      | Complex with SecB     | 65.9                                                | 53.9  | 43.0  | 2.4                                                             | 2.0   | 1.6   |  |
|                 |              |                      | Complex with TF (Tig) | 71.3                                                | 60.2  | 46.5  | 3.0                                                             | 2.5   | 2.0   |  |
| P0ACP5          | GntR         |                      | Monomer               | 103.9                                               | 87.8  | 67.8  | 7.7                                                             | 6.5   | 5.0   |  |
| P39835          | GntT         | Cell inner membrane  | Monomer               | 94.9                                                | 80.2  | 61.9  | 6.2                                                             | 5.2   | 4.0   |  |
|                 |              |                      | Complex with SecB     | 66.2                                                | 54.1  | 43.2  | 2.5                                                             | 2.0   | 1.6   |  |
|                 |              |                      | Complex with TF (Tig) | 71.6                                                | 60.5  | 46.7  | 3.0                                                             | 2.6   | 2.0   |  |
| P0AC96          | GntU         | Cell inner membrane  | Monomer               | 94.5                                                | 79.8  | 61.7  | 6.1                                                             | 5.2   | 4.0   |  |
|                 |              |                      | Complex with SecB     | 66.1                                                | 54.0  | 43.1  | 2.4                                                             | 2.0   | 1.6   |  |
|                 |              |                      | Complex with TF (Tig) | 71.5                                                | 60.4  | 46.7  | 3.0                                                             | 2.5   | 2.0   |  |
| P46846          | GntX         |                      | Monomer               | 119.1                                               | 100.6 | 77.7  | 10.5                                                            | 8.9   | 6.9   |  |
| P06715          | Gor          | Cytoplasm            | Monomer               | 92.7                                                | 78.3  | 60.5  | 5.8                                                             | 4.9   | 3.8   |  |
|                 |              |                      | Homodimer             | 70.6                                                | 57.7  | 46.1  | 2.9                                                             | 2.4   | 1.9   |  |
| P32662          | Gph          |                      | Monomer               | 116.2                                               | 98.2  | 75.8  | 10.0                                                            | 8.4   | 6.5   |  |
| P62707          | GpmA         |                      | Monomer               | 114.3                                               | 96.6  | 74.6  | 9.6                                                             | 8.1   | 6.3   |  |
|                 |              |                      | Homodimer             | 87.1                                                | 71.2  | 56.9  | 5.0                                                             | 4.1   | 3.3   |  |
| P0A7A2          | GpmB         |                      | Monomer               | 122.3                                               | 103.3 | 79.8  | 11.2                                                            | 9.4   | 7.3   |  |
| P37689          | GpmI         |                      | Monomer               | 87.7                                                | 74.1  | 57.2  | 5.1                                                             | 4.3   | 3.3   |  |

| UniProtKB A. N. | Protein name | Subcellular location | Subunit               | $D_0 \left( \frac{\mu\text{m}^2}{\text{s}} \right)$ |       |       | $D_{\text{cyto}} \left( \frac{\mu\text{m}^2}{\text{s}} \right)$ |       |       |
|-----------------|--------------|----------------------|-----------------------|-----------------------------------------------------|-------|-------|-----------------------------------------------------------------|-------|-------|
|                 |              |                      |                       | 310 K                                               | 303 K | 293 K | 310 K                                                           | 303 K | 293 K |
| P25552          | GppA         |                      | Monomer               | 88.5                                                | 74.8  | 57.8  | 5.2                                                             | 4.4   | 3.4   |
| P0A6S7          | GpsA         | Cytoplasm            | Monomer               | 104.0                                               | 87.9  | 67.9  | 7.7                                                             | 6.5   | 5.0   |
| P0A9M5          | Gpt          | Cell inner membrane  | Monomer               | 140.2                                               | 118.5 | 91.5  | 15.1                                                            | 12.8  | 9.9   |
|                 |              |                      | Complex with SecB     | 74.2                                                | 60.6  | 48.4  | 3.3                                                             | 2.7   | 2.2   |
|                 |              |                      | Complex with TF (Tig) | 82.7                                                | 69.9  | 54.0  | 4.4                                                             | 3.7   | 2.9   |
| P68066          | GrcA         |                      | Monomer               | 150.0                                               | 126.7 | 97.9  | 17.5                                                            | 14.8  | 11.4  |
| P0A6W5          | GreA         |                      | Monomer               | 138.1                                               | 116.7 | 90.1  | 14.6                                                            | 12.4  | 9.5   |
| P30128          | GreB         |                      | Monomer               | 135.5                                               | 114.4 | 88.4  | 14.0                                                            | 11.8  | 9.2   |
| P0A6F5          | GroL         | Cytoplasm            | Monomer               | 87.0                                                | 73.5  | 56.8  | 5.0                                                             | 4.2   | 3.3   |
| P0A6F9          | GroS         | Cytoplasm            | Monomer               | 170.0                                               | 143.6 | 110.9 | 22.7                                                            | 19.2  | 14.8  |
| P09372          | GrpE         | Cytoplasm            | Monomer               | 127.1                                               | 107.4 | 82.9  | 12.2                                                            | 10.3  | 8.0   |
|                 |              |                      | Homodimer             | 96.9                                                | 79.1  | 63.2  | 6.5                                                             | 5.3   | 4.2   |
| P68688          | GrxA         |                      | Monomer               | 174.7                                               | 147.6 | 114.0 | 24.0                                                            | 20.3  | 15.7  |
| P0AC59          | GrxB         |                      | Monomer               | 121.7                                               | 102.8 | 79.4  | 11.1                                                            | 9.3   | 7.2   |
| P0AC62          | GrxC         |                      | Monomer               | 178.7                                               | 151.0 | 116.6 | 25.1                                                            | 21.2  | 16.4  |
| P0AC69          | GrxD         | Cytoplasm            | Monomer               | 156.2                                               | 132.0 | 101.9 | 19.0                                                            | 16.1  | 12.4  |
|                 |              |                      | Homodimer             | 119.1                                               | 97.3  | 77.7  | 10.5                                                            | 8.6   | 6.9   |
| P0A6W9          | GshA         |                      | Monomer               | 86.5                                                | 73.0  | 56.4  | 4.9                                                             | 4.2   | 3.2   |
| P04425          | GshB         |                      | Monomer               | 104.9                                               | 88.6  | 68.5  | 7.9                                                             | 6.6   | 5.1   |
|                 |              |                      | Homotetramer          | 60.9                                                | 49.8  | 39.8  | 2.0                                                             | 1.6   | 1.3   |
| P75796          | GsiA         | Cell inner membrane  | Monomer               | 80.9                                                | 68.3  | 52.8  | 4.2                                                             | 3.5   | 2.7   |
|                 |              |                      | Complex with SecB     | 61.6                                                | 50.3  | 40.2  | 2.0                                                             | 1.6   | 1.3   |
|                 |              |                      | Complex with TF (Tig) | 65.7                                                | 55.5  | 42.9  | 2.4                                                             | 2.0   | 1.6   |
| P75797          | GsiB         | Periplasm            | Monomer               | 87.5                                                | 73.9  | 57.1  | 5.1                                                             | 4.3   | 3.3   |
|                 |              |                      | Complex with SecB     | 64.0                                                | 52.3  | 41.8  | 2.2                                                             | 1.8   | 1.5   |
|                 |              |                      | Complex with TF (Tig) | 68.7                                                | 58.1  | 44.8  | 2.7                                                             | 2.3   | 1.8   |
| P75798          | GsiC         | Cell inner membrane  | Monomer               | 106.7                                               | 90.1  | 69.6  | 8.2                                                             | 6.9   | 5.3   |
|                 |              |                      | Complex with SecB     | 69.1                                                | 56.5  | 45.1  | 2.8                                                             | 2.3   | 1.8   |
|                 |              |                      | Complex with TF (Tig) | 75.5                                                | 63.8  | 49.3  | 3.5                                                             | 2.9   | 2.3   |
| P75799          | GsiD         | Cell inner membrane  | Monomer               | 107.7                                               | 91.0  | 70.3  | 8.4                                                             | 7.1   | 5.5   |
|                 |              |                      | Complex with SecB     | 69.3                                                | 56.6  | 45.2  | 2.8                                                             | 2.3   | 1.8   |

| UniProtKB A. N. | Protein name | Subcellular location | Subunit               | $D_0 \left( \frac{\mu\text{m}^2}{\text{s}} \right)$ |       |       | $D_{\text{cyto}} \left( \frac{\mu\text{m}^2}{\text{s}} \right)$ |       |       |
|-----------------|--------------|----------------------|-----------------------|-----------------------------------------------------|-------|-------|-----------------------------------------------------------------|-------|-------|
|                 |              |                      |                       | 310 K                                               | 303 K | 293 K | 310 K                                                           | 303 K | 293 K |
|                 |              |                      | Complex with TF (Tig) | 75.8                                                | 64.1  | 49.5  | 3.5                                                             | 3.0   | 2.3   |
| P0AEW6          | Gsk          |                      | Monomer               | 92.9                                                | 78.5  | 60.6  | 5.9                                                             | 5.0   | 3.8   |
| P0AES0          | Gsp          |                      | Monomer               | 80.2                                                | 67.8  | 52.3  | 4.1                                                             | 3.4   | 2.7   |
| P45756          | GspA         |                      | Monomer               | 88.2                                                | 74.6  | 57.6  | 5.2                                                             | 4.4   | 3.4   |
|                 |              |                      | Monomer               | 112.1                                               | 94.7  | 73.1  | 9.2                                                             | 7.7   | 6.0   |
| P45757          | GspC         | Cell inner membrane  | Complex with SecB     | 70.2                                                | 57.3  | 45.8  | 2.9                                                             | 2.3   | 1.9   |
|                 |              |                      | Complex with TF (Tig) | 77.0                                                | 65.1  | 50.3  | 3.7                                                             | 3.1   | 2.4   |
|                 |              |                      | Monomer               | 80.1                                                | 67.7  | 52.3  | 4.1                                                             | 3.4   | 2.6   |
| P45758          | GspD         | Cell outer membrane  | Complex with SecB     | 61.3                                                | 50.1  | 40.0  | 2.0                                                             | 1.6   | 1.3   |
|                 |              |                      | Complex with TF (Tig) | 65.4                                                | 55.2  | 42.7  | 2.4                                                             | 2.0   | 1.5   |
| P45759          | GspE         | Cytoplasm            | Monomer               | 88.7                                                | 74.9  | 57.9  | 5.2                                                             | 4.4   | 3.4   |
| P45760          | GspI         |                      | Monomer               | 151.6                                               | 128.1 | 98.9  | 17.9                                                            | 15.1  | 11.7  |
| P45761          | GspJ         |                      | Monomer               | 126.1                                               | 106.6 | 82.3  | 12.0                                                            | 10.1  | 7.8   |
|                 |              |                      | Monomer               | 102.6                                               | 86.7  | 67.0  | 7.4                                                             | 6.3   | 4.9   |
| P45762          | GspK         | Cell inner membrane  | Complex with SecB     | 68.2                                                | 55.7  | 44.5  | 2.7                                                             | 2.2   | 1.7   |
|                 |              |                      | Complex with TF (Tig) | 74.3                                                | 62.7  | 48.5  | 3.3                                                             | 2.8   | 2.2   |
|                 |              |                      | Monomer               | 96.1                                                | 81.1  | 62.7  | 6.4                                                             | 5.4   | 4.2   |
| P45763          | GspL         | Cell inner membrane  | Complex with SecB     | 66.5                                                | 54.4  | 43.4  | 2.5                                                             | 2.0   | 1.6   |
|                 |              |                      | Complex with TF (Tig) | 72.1                                                | 60.9  | 47.0  | 3.1                                                             | 2.6   | 2.0   |
|                 |              |                      | Monomer               | 124.7                                               | 105.4 | 81.4  | 11.7                                                            | 9.9   | 7.6   |
| P0A9D2          | Gst          | Cytoplasm            | Homodimer             | 95.1                                                | 77.7  | 62.0  | 6.2                                                             | 5.1   | 4.0   |
|                 |              |                      | Monomer               | 86.2                                                | 72.8  | 56.3  | 4.9                                                             | 4.1   | 3.2   |
| P04079          | GuaA         |                      | Homodimer             | 65.7                                                | 53.7  | 42.9  | 2.4                                                             | 2.0   | 1.6   |
|                 |              |                      | Monomer               | 90.4                                                | 76.4  | 59.0  | 5.5                                                             | 4.6   | 3.6   |
| P0ADG7          | GuaB         |                      | Homotetramer          | 52.5                                                | 42.9  | 34.3  | 1.3                                                             | 1.0   | 0.8   |
|                 |              |                      | Monomer               | 102.9                                               | 86.9  | 67.1  | 7.5                                                             | 6.3   | 4.9   |
| P60560          | GuaC         |                      | Homotetramer          | 59.7                                                | 48.8  | 39.0  | 1.9                                                             | 1.5   | 1.2   |
| P76641          | GuaD         |                      | Monomer               | 91.6                                                | 77.4  | 59.8  | 5.7                                                             | 4.8   | 3.7   |
| P0AES2          | GudD         |                      | Monomer               | 92.4                                                | 78.1  | 60.3  | 5.8                                                             | 4.9   | 3.8   |
|                 |              |                      | Monomer               | 92.4                                                | 78.1  | 60.3  | 5.8                                                             | 4.9   | 3.8   |
| Q46916          | GudP         | Cell inner membrane  | Complex with SecB     | 65.5                                                | 53.5  | 42.7  | 2.4                                                             | 2.0   | 1.6   |



| UniProtKB A. N. | Protein name | Subcellular location | Subunit               | $D_0 \left( \frac{\mu\text{m}^2}{\text{s}} \right)$ |       |       | $D_{\text{cyto}} \left( \frac{\mu\text{m}^2}{\text{s}} \right)$ |       |       |
|-----------------|--------------|----------------------|-----------------------|-----------------------------------------------------|-------|-------|-----------------------------------------------------------------|-------|-------|
|                 |              |                      |                       | 310 K                                               | 303 K | 293 K | 310 K                                                           | 303 K | 293 K |
|                 |              |                      | Complex with TF (Tig) | 70.7                                                | 59.7  | 46.1  | 2.9                                                             | 2.5   | 1.9   |
| Q46915          | GudX         |                      | Monomer               | 92.6                                                | 78.3  | 60.5  | 5.8                                                             | 4.9   | 3.8   |
| P15081          | GutM         |                      | Monomer               | 155.9                                               | 131.7 | 101.7 | 18.9                                                            | 16.0  | 12.4  |
| P17115          | GutQ         |                      | Monomer               | 106.7                                               | 90.2  | 69.7  | 8.2                                                             | 6.9   | 5.3   |
|                 |              |                      | Homotetramer          | 62.0                                                | 50.6  | 40.5  | 2.1                                                             | 1.7   | 1.3   |
| P0AES4          | GyrA         | Cytoplasm            | Monomer               | 70.8                                                | 59.8  | 46.2  | 2.9                                                             | 2.5   | 1.9   |
| P0AES6          | GyrB         | Cytoplasm            | Monomer               | 72.9                                                | 61.6  | 47.6  | 3.2                                                             | 2.7   | 2.1   |
| P0CI31          | HcaB         |                      | Monomer               | 114.4                                               | 96.7  | 74.7  | 9.6                                                             | 8.1   | 6.3   |
| P0ABW0          | HcaC         |                      | Monomer               | 164.3                                               | 138.8 | 107.2 | 21.1                                                            | 17.9  | 13.8  |
| P77650          | HcaD         |                      | Monomer               | 96.5                                                | 81.6  | 63.0  | 6.4                                                             | 5.4   | 4.2   |
| P0ABR5          | HcaE         |                      | Monomer               | 91.0                                                | 76.9  | 59.4  | 5.6                                                             | 4.7   | 3.6   |
| Q47140          | HcaF         |                      | Monomer               | 130.0                                               | 109.8 | 84.8  | 12.8                                                            | 10.8  | 8.4   |
| Q47141          | HcaR         |                      | Monomer               | 108.2                                               | 91.4  | 70.6  | 8.4                                                             | 7.1   | 5.5   |
| Q47142          | HcaT         | Cell inner membrane  | Monomer               | 98.7                                                | 83.4  | 64.4  | 6.8                                                             | 5.7   | 4.4   |
|                 |              |                      | Complex with SecB     | 67.2                                                | 54.9  | 43.9  | 2.6                                                             | 2.1   | 1.7   |
|                 |              |                      | Complex with TF (Tig) | 73.0                                                | 61.7  | 47.6  | 3.2                                                             | 2.7   | 2.1   |
| P31658          | HchA         | Cytoplasm            | Monomer               | 110.5                                               | 93.3  | 72.1  | 8.9                                                             | 7.5   | 5.8   |
|                 |              |                      | Homodimer             | 84.2                                                | 68.8  | 54.9  | 4.6                                                             | 3.8   | 3.0   |
| P75825          | Hcp          | Cytoplasm            | Monomer               | 85.4                                                | 72.2  | 55.7  | 4.8                                                             | 4.0   | 3.1   |
| P75824          | Hcr          |                      | Monomer               | 104.7                                               | 88.5  | 68.3  | 7.8                                                             | 6.6   | 5.1   |
| P69931          | Hda          |                      | Monomer               | 117.5                                               | 99.3  | 76.7  | 10.2                                                            | 8.6   | 6.7   |
| P0AES9          | HdeA         | Periplasm            | Monomer               | 161.4                                               | 136.3 | 105.3 | 20.4                                                            | 17.2  | 13.3  |
|                 |              |                      | Complex with SecB     | 76.0                                                | 62.1  | 49.6  | 3.5                                                             | 2.9   | 2.3   |
|                 |              |                      | Complex with TF (Tig) | 85.4                                                | 72.2  | 55.8  | 4.8                                                             | 4.0   | 3.1   |
| P0AET2          | HdeB         |                      | Monomer               | 160.4                                               | 135.5 | 104.7 | 20.1                                                            | 17.0  | 13.1  |
| P0AET5          | HdeD         | Cell inner membrane  | Monomer               | 129.2                                               | 109.2 | 84.3  | 12.6                                                            | 10.7  | 8.2   |
|                 |              |                      | Complex with SecB     | 72.9                                                | 59.6  | 47.6  | 3.2                                                             | 2.6   | 2.1   |
|                 |              |                      | Complex with TF (Tig) | 80.9                                                | 68.3  | 52.8  | 4.2                                                             | 3.5   | 2.7   |
| P0A8R9          | HdfR         |                      | Monomer               | 109.7                                               | 92.7  | 71.6  | 8.7                                                             | 7.4   | 5.7   |
| P0AET8          | HdhA         |                      | Monomer               | 117.3                                               | 99.1  | 76.5  | 10.2                                                            | 8.6   | 6.6   |
|                 |              |                      | Homotetramer          | 68.1                                                | 55.6  | 44.4  | 2.7                                                             | 2.2   | 1.7   |

| UniProtKB A. N. | Protein name | Subcellular location           | Subunit               | $D_0 \left( \frac{\mu\text{m}^2}{\text{s}} \right)$ |       |       | $D_{\text{cyto}} \left( \frac{\mu\text{m}^2}{\text{s}} \right)$ |       |       |
|-----------------|--------------|--------------------------------|-----------------------|-----------------------------------------------------|-------|-------|-----------------------------------------------------------------|-------|-------|
|                 |              |                                |                       | 310 K                                               | 303 K | 293 K | 310 K                                                           | 303 K | 293 K |
| P15038          | HemD         |                                | Monomer               | 77.1                                                | 65.2  | 50.3  | 3.7                                                             | 3.1   | 2.4   |
| P0A6X1          | HemA         |                                | Monomer               | 94.6                                                | 79.9  | 61.7  | 6.1                                                             | 5.2   | 4.0   |
|                 |              |                                | Homodimer             | 72.1                                                | 58.9  | 47.0  | 3.1                                                             | 2.5   | 2.0   |
| P0ACB2          | HemB         |                                | Monomer               | 104.8                                               | 88.6  | 68.4  | 7.8                                                             | 6.6   | 5.1   |
|                 |              |                                | Homooctamer           | 46.4                                                | 37.9  | 30.3  | 0.9                                                             | 0.7   | 0.6   |
| P06983          | HemC         |                                | Monomer               | 107.0                                               | 90.4  | 69.8  | 8.2                                                             | 6.9   | 5.4   |
| P09126          | HemD         |                                | Monomer               | 115.6                                               | 97.6  | 75.4  | 9.8                                                             | 8.3   | 6.4   |
| P29680          | HemE         | Cytoplasm                      | Monomer               | 100.9                                               | 85.3  | 65.9  | 7.2                                                             | 6.1   | 4.7   |
|                 |              |                                | Homodimer             | 76.9                                                | 62.8  | 50.2  | 3.7                                                             | 3.0   | 2.4   |
| P36553          | HemF         | Cytoplasm                      | Monomer               | 106.4                                               | 89.9  | 69.4  | 8.1                                                             | 6.9   | 5.3   |
|                 |              |                                | Homodimer             | 81.1                                                | 66.2  | 52.9  | 4.2                                                             | 3.4   | 2.7   |
| P0ACB4          | HemG         |                                | Monomer               | 128.4                                               | 108.5 | 83.8  | 12.5                                                            | 10.5  | 8.1   |
| P23871          | HemH         | Cytoplasm                      | Monomer               | 104.5                                               | 88.3  | 68.2  | 7.8                                                             | 6.6   | 5.1   |
| P0ACC1          | HemK         |                                | Monomer               | 110.8                                               | 93.6  | 72.3  | 8.9                                                             | 7.5   | 5.8   |
| P23893          | HemL         | Cytoplasm                      | Monomer               | 95.4                                                | 80.6  | 62.2  | 6.3                                                             | 5.3   | 4.1   |
|                 |              |                                | Homodimer             | 72.7                                                | 59.4  | 47.4  | 3.2                                                             | 2.6   | 2.1   |
| P32131          | HemN         | Cytoplasm                      | Monomer               | 89.9                                                | 76.0  | 58.7  | 5.4                                                             | 4.6   | 3.5   |
| P09127          | HemX         | Cell inner membrane            | Monomer               | 97.4                                                | 82.3  | 63.6  | 6.6                                                             | 5.6   | 4.3   |
|                 |              |                                | Complex with SecB     | 66.9                                                | 54.7  | 43.7  | 2.5                                                             | 2.1   | 1.6   |
|                 |              |                                | Complex with TF (Tig) | 72.5                                                | 61.3  | 47.3  | 3.1                                                             | 2.6   | 2.0   |
| P0ACB7          | HemY         | Cell inner membrane            | Monomer               | 95.5                                                | 80.7  | 62.3  | 6.3                                                             | 5.3   | 4.1   |
|                 |              |                                | Complex with SecB     | 66.4                                                | 54.2  | 43.3  | 2.5                                                             | 2.0   | 1.6   |
|                 |              |                                | Complex with TF (Tig) | 71.8                                                | 60.7  | 46.9  | 3.1                                                             | 2.6   | 2.0   |
| P46118          | HexR         |                                | Monomer               | 109.4                                               | 92.4  | 71.4  | 8.7                                                             | 7.3   | 5.6   |
| P0ABC3          | HflC         | Cell inner membrane            | Monomer               | 102.6                                               | 86.7  | 66.9  | 7.4                                                             | 6.3   | 4.9   |
|                 |              |                                | Complex with SecB     | 68.2                                                | 55.7  | 44.5  | 2.7                                                             | 2.2   | 1.7   |
|                 |              |                                | Complex with TF (Tig) | 74.3                                                | 62.7  | 48.5  | 3.3                                                             | 2.8   | 2.2   |
| P25746          | HflD         | Cytoplasm. Cell inner membrane | Monomer               | 124.6                                               | 105.2 | 81.3  | 11.6                                                            | 9.8   | 7.6   |
| P0ABC7          | HflK         | Cell inner membrane            | Monomer               | 95.2                                                | 80.4  | 62.1  | 6.2                                                             | 5.3   | 4.1   |
|                 |              |                                | Complex with SecB     | 66.3                                                | 54.2  | 43.3  | 2.5                                                             | 2.0   | 1.6   |

| UniProtKB A. N. | Protein name | Subcellular location | Subunit                                                | $D_0 \left( \frac{\mu\text{m}^2}{\text{s}} \right)$ |       |       | $D_{\text{cyto}} \left( \frac{\mu\text{m}^2}{\text{s}} \right)$ |       |       |
|-----------------|--------------|----------------------|--------------------------------------------------------|-----------------------------------------------------|-------|-------|-----------------------------------------------------------------|-------|-------|
|                 |              |                      |                                                        | 310 K                                               | 303 K | 293 K | 310 K                                                           | 303 K | 293 K |
|                 |              |                      | Complex with TF (Tig)                                  | 71.8                                                | 60.6  | 46.8  | 3.0                                                             | 2.6   | 2.0   |
| P25519          | HflX         | Cytoplasm            | Monomer                                                | 93.0                                                | 78.6  | 60.7  | 5.9                                                             | 5.0   | 3.8   |
| P0A6X3          | Hfq          |                      | Monomer                                                | 165.2                                               | 139.6 | 107.8 | 21.4                                                            | 18.1  | 14.0  |
|                 |              |                      | Homo-hexamers                                          | 81.9                                                | 66.9  | 53.4  | 4.3                                                             | 3.5   | 2.8   |
| P0ACE3          | Hha          |                      | Monomer                                                | 182.8                                               | 154.4 | 119.3 | 26.3                                                            | 22.2  | 17.2  |
| P76106          | HicA         |                      | Monomer                                                | 200.9                                               | 169.7 | 131.1 | 31.7                                                            | 26.8  | 20.7  |
| P67697          | HicB         |                      | Monomer                                                | 146.2                                               | 123.5 | 95.4  | 16.5                                                            | 14.0  | 10.8  |
| P67701          | HigA         |                      | Monomer                                                | 147.2                                               | 124.3 | 96.0  | 16.8                                                            | 14.2  | 10.9  |
| P64578          | HigB         |                      | Monomer                                                | 160.1                                               | 135.2 | 104.5 | 20.0                                                            | 16.9  | 13.1  |
| P0ACE7          | HinT         |                      | Monomer                                                | 154.5                                               | 130.6 | 100.8 | 18.6                                                            | 15.7  | 12.1  |
| P23874          | HipA         |                      | Monomer                                                | 92.3                                                | 78.0  | 60.2  | 5.8                                                             | 4.9   | 3.8   |
|                 |              |                      | Heterotetramer (HipA <sub>2</sub> -HipB <sub>2</sub> ) | 65.4                                                | 55.3  | 42.7  | 2.4                                                             | 2.0   | 1.6   |
| P23873          | HipB         |                      | Monomer                                                | 172.4                                               | 145.7 | 112.5 | 23.4                                                            | 19.7  | 15.2  |
|                 |              |                      | Homodimer                                              | 131.4                                               | 107.3 | 85.7  | 13.1                                                            | 10.7  | 8.6   |
|                 |              |                      | Heterotetramer (HipA <sub>2</sub> -HipB <sub>2</sub> ) | 65.4                                                | 55.3  | 42.7  | 2.4                                                             | 2.0   | 1.6   |
| P10371          | HisA         | Cytoplasm            | Monomer                                                | 118.6                                               | 100.2 | 77.4  | 10.4                                                            | 8.8   | 6.8   |
| P06987          | HisB         | Cytoplasm            | Monomer                                                | 99.9                                                | 84.4  | 65.2  | 7.0                                                             | 5.9   | 4.6   |
| P06986          | HisC         |                      | Monomer                                                | 100.8                                               | 85.2  | 65.8  | 7.1                                                             | 6.0   | 4.7   |
|                 |              |                      | Homodimer                                              | 76.8                                                | 62.8  | 50.1  | 3.6                                                             | 3.0   | 2.4   |
| P06988          | HisD         |                      | Monomer                                                | 94.8                                                | 80.1  | 61.8  | 6.2                                                             | 5.2   | 4.0   |
|                 |              |                      | Homodimer                                              | 72.2                                                | 59.0  | 47.1  | 3.1                                                             | 2.5   | 2.0   |
| P60664          | HisF         | Cytoplasm            | Monomer                                                | 114.5                                               | 96.7  | 74.7  | 9.6                                                             | 8.1   | 6.3   |
|                 |              |                      | Heterodimer (HisH-HisF)                                | 91.7                                                | 77.5  | 59.9  | 5.7                                                             | 4.8   | 3.7   |
| P60757          | HisG         | Cytoplasm            | Monomer                                                | 107.6                                               | 90.9  | 70.2  | 8.3                                                             | 7.0   | 5.4   |
| P60595          | HisH         | Cytoplasm            | Monomer                                                | 127.4                                               | 107.7 | 83.2  | 12.3                                                            | 10.4  | 8.0   |
|                 |              |                      | Heterodimer (HisH-HisF)                                | 91.7                                                | 77.5  | 59.9  | 5.7                                                             | 4.8   | 3.7   |
| P06989          | HisI         | Cytoplasm            | Monomer                                                | 125.0                                               | 105.6 | 81.6  | 11.7                                                            | 9.9   | 7.7   |
| P0AEU0          | HisJ         | Periplasm            | Monomer                                                | 114.5                                               | 96.7  | 74.7  | 9.6                                                             | 8.1   | 6.3   |
|                 |              |                      | Complex with SecB                                      | 70.6                                                | 57.7  | 46.1  | 2.9                                                             | 2.4   | 1.9   |
|                 |              |                      | Complex with TF (Tig)                                  | 77.6                                                | 65.6  | 50.7  | 3.7                                                             | 3.2   | 2.4   |

| UniProtKB A. N. | Protein name | Subcellular location                    | Subunit               | $D_0 \left( \frac{\mu\text{m}^2}{\text{s}} \right)$ |       |       | $D_{\text{cyto}} \left( \frac{\mu\text{m}^2}{\text{s}} \right)$ |       |       |
|-----------------|--------------|-----------------------------------------|-----------------------|-----------------------------------------------------|-------|-------|-----------------------------------------------------------------|-------|-------|
|                 |              |                                         |                       | 310 K                                               | 303 K | 293 K | 310 K                                                           | 303 K | 293 K |
| P60995          | HisL         |                                         | Monomer               | 319.2                                               | 269.7 | 208.3 | 75.1                                                            | 63.4  | 49.0  |
| P0AEU3          | HisM         | Cell inner membrane                     | Monomer               | 117.1                                               | 98.9  | 76.4  | 10.1                                                            | 8.6   | 6.6   |
|                 |              |                                         | Complex with SecB     | 71.1                                                | 58.1  | 46.4  | 3.0                                                             | 2.4   | 1.9   |
|                 |              |                                         | Complex with TF (Tig) | 78.3                                                | 66.1  | 51.1  | 3.8                                                             | 3.2   | 2.5   |
| P07109          | HisP         | Cell inner membrane                     | Monomer               | 114.2                                               | 96.5  | 74.5  | 9.6                                                             | 8.1   | 6.2   |
|                 |              |                                         | Complex with SecB     | 70.6                                                | 57.7  | 46.1  | 2.9                                                             | 2.4   | 1.9   |
|                 |              |                                         | Complex with TF (Tig) | 77.6                                                | 65.5  | 50.6  | 3.7                                                             | 3.2   | 2.4   |
| P52094          | HisQ         | Cell inner membrane                     | Monomer               | 121.1                                               | 102.3 | 79.0  | 10.9                                                            | 9.2   | 7.1   |
|                 |              |                                         | Complex with SecB     | 71.7                                                | 58.6  | 46.8  | 3.0                                                             | 2.5   | 2.0   |
|                 |              |                                         | Complex with TF (Tig) | 79.2                                                | 66.9  | 51.7  | 3.9                                                             | 3.3   | 2.6   |
| P60906          | HisS         | Cytoplasm                               | Monomer               | 94.0                                                | 79.4  | 61.4  | 6.0                                                             | 5.1   | 3.9   |
|                 |              |                                         | Homodimer             | 71.7                                                | 58.5  | 46.8  | 3.0                                                             | 2.5   | 2.0   |
| P76341          | HiuH         | Periplasm                               | Monomer               | 145.4                                               | 122.9 | 94.9  | 16.4                                                            | 13.8  | 10.7  |
|                 |              |                                         | Complex with SecB     | 74.7                                                | 61.0  | 48.8  | 3.4                                                             | 2.8   | 2.2   |
|                 |              |                                         | Complex with TF (Tig) | 83.5                                                | 70.6  | 54.5  | 4.5                                                             | 3.8   | 2.9   |
| P67910          | HldD         |                                         | Monomer               | 105.7                                               | 89.3  | 69.0  | 8.0                                                             | 6.8   | 5.2   |
|                 |              |                                         | Homopentamer          | 56.2                                                | 45.9  | 36.7  | 1.6                                                             | 1.3   | 1.0   |
| P76658          | HldE         |                                         | Monomer               | 91.1                                                | 76.9  | 59.4  | 5.6                                                             | 4.7   | 3.6   |
|                 |              |                                         | Homodimer             | 69.4                                                | 56.7  | 45.3  | 2.8                                                             | 2.3   | 1.8   |
| P77335          | HlyE         | Secreted. Periplasm. Host cell membrane | Monomer               | 107.1                                               | 90.5  | 69.9  | 8.2                                                             | 7.0   | 5.4   |
|                 |              |                                         | Complex with SecB     | 69.2                                                | 56.5  | 45.1  | 2.8                                                             | 2.3   | 1.8   |
|                 |              |                                         | Complex with TF (Tig) | 75.6                                                | 63.9  | 49.4  | 3.5                                                             | 3.0   | 2.3   |
| P24232          | Hmp          | Cytoplasm                               | Monomer               | 96.6                                                | 81.6  | 63.1  | 6.5                                                             | 5.5   | 4.2   |
| P0AEV1          | Hnr          |                                         | Monomer               | 103.0                                               | 87.0  | 67.2  | 7.5                                                             | 6.3   | 4.9   |
| P0ACF8          | Hns          |                                         | Monomer               | 145.1                                               | 122.6 | 94.7  | 16.3                                                            | 13.8  | 10.6  |
|                 |              |                                         | Homodimer             | 110.6                                               | 90.4  | 72.2  | 8.9                                                             | 7.3   | 5.8   |
| P36645          | HofB         |                                         | Monomer               | 91.4                                                | 77.2  | 59.6  | 5.6                                                             | 4.8   | 3.7   |
| P36646          | HofC         | Cell inner membrane                     | Monomer               | 96.1                                                | 81.2  | 62.7  | 6.4                                                             | 5.4   | 4.2   |
|                 |              |                                         | Complex with SecB     | 66.6                                                | 54.4  | 43.4  | 2.5                                                             | 2.0   | 1.6   |
|                 |              |                                         | Complex with TF (Tig) | 72.1                                                | 60.9  | 47.0  | 3.1                                                             | 2.6   | 2.0   |

| UniProtKB A. N. | Protein name | Subcellular location | Subunit               | $D_0 \left( \frac{\mu\text{m}^2}{\text{s}} \right)$ |       |       | $D_{\text{cyto}} \left( \frac{\mu\text{m}^2}{\text{s}} \right)$ |       |       |
|-----------------|--------------|----------------------|-----------------------|-----------------------------------------------------|-------|-------|-----------------------------------------------------------------|-------|-------|
|                 |              |                      |                       | 310 K                                               | 303 K | 293 K | 310 K                                                           | 303 K | 293 K |
| P25960          | HofD         | Cell inner membrane  | Monomer               | 120.5                                               | 101.8 | 78.7  | 10.8                                                            | 9.1   | 7.1   |
|                 |              |                      | Complex with SecB     | 71.7                                                | 58.5  | 46.8  | 3.0                                                             | 2.5   | 2.0   |
|                 |              |                      | Complex with TF (Tig) | 79.1                                                | 66.8  | 51.6  | 3.9                                                             | 3.3   | 2.6   |
| P41441          | HofF         | Cell inner membrane  | Monomer               | 96.2                                                | 81.3  | 62.8  | 6.4                                                             | 5.4   | 4.2   |
|                 |              |                      | Complex with SecB     | 66.6                                                | 54.4  | 43.4  | 2.5                                                             | 2.0   | 1.6   |
|                 |              |                      | Complex with TF (Tig) | 72.1                                                | 60.9  | 47.1  | 3.1                                                             | 2.6   | 2.0   |
| P41442          | HofG         |                      | Monomer               | 143.8                                               | 121.5 | 93.9  | 16.0                                                            | 13.5  | 10.4  |
| P41443          | HofH         |                      | Monomer               | 135.4                                               | 114.4 | 88.3  | 14.0                                                            | 11.8  | 9.1   |
| P45753          | HofM         |                      | Monomer               | 113.7                                               | 96.0  | 74.2  | 9.5                                                             | 8.0   | 6.2   |
| P64634          | HofN         | Cell membrane        | Monomer               | 129.5                                               | 109.4 | 84.5  | 12.7                                                            | 10.7  | 8.3   |
|                 |              |                      | Complex with SecB     | 72.9                                                | 59.6  | 47.6  | 3.2                                                             | 2.6   | 2.1   |
|                 |              |                      | Complex with TF (Tig) | 80.9                                                | 68.4  | 52.8  | 4.2                                                             | 3.5   | 2.7   |
| P45751          | HofO         | Cell membrane        | Monomer               | 140.6                                               | 118.8 | 91.8  | 15.2                                                            | 12.8  | 9.9   |
|                 |              |                      | Complex with SecB     | 74.2                                                | 60.6  | 48.4  | 3.3                                                             | 2.7   | 2.2   |
|                 |              |                      | Complex with TF (Tig) | 82.8                                                | 70.0  | 54.0  | 4.4                                                             | 3.7   | 2.9   |
| P45750          | HofP         |                      | Monomer               | 146.8                                               | 124.0 | 95.8  | 16.7                                                            | 14.1  | 10.9  |
| P34749          | HofQ         | Cell outer membrane  | Monomer               | 95.9                                                | 81.0  | 62.6  | 6.3                                                             | 5.4   | 4.1   |
|                 |              |                      | Complex with SecB     | 66.5                                                | 54.3  | 43.4  | 2.5                                                             | 2.0   | 1.6   |
|                 |              |                      | Complex with TF (Tig) | 72.0                                                | 60.8  | 47.0  | 3.1                                                             | 2.6   | 2.0   |
| P37305          | HokA         | Membrane             | Monomer               | 210.8                                               | 178.1 | 137.6 | 34.9                                                            | 29.5  | 22.8  |
|                 |              |                      | Complex with SecB     | 78.3                                                | 63.9  | 51.1  | 3.8                                                             | 3.1   | 2.5   |
|                 |              |                      | Complex with TF (Tig) | 88.9                                                | 75.1  | 58.0  | 5.3                                                             | 4.5   | 3.4   |
| P77494          | HokB         | Membrane             | Monomer               | 216.1                                               | 182.6 | 141.0 | 36.6                                                            | 30.9  | 23.9  |
|                 |              |                      | Complex with SecB     | 78.4                                                | 64.1  | 51.2  | 3.8                                                             | 3.1   | 2.5   |
|                 |              |                      | Complex with TF (Tig) | 89.2                                                | 75.3  | 58.2  | 5.3                                                             | 4.5   | 3.5   |
| P0ACG4          | HokC         | Cell inner membrane  | Monomer               | 218.0                                               | 184.2 | 142.3 | 37.2                                                            | 31.5  | 24.3  |
|                 |              |                      | Complex with SecB     | 78.5                                                | 64.1  | 51.2  | 3.8                                                             | 3.1   | 2.5   |
|                 |              |                      | Complex with TF (Tig) | 89.3                                                | 75.4  | 58.3  | 5.3                                                             | 4.5   | 3.5   |
| P0ACG6          | HokD         | Cell membrane        | Monomer               | 214.5                                               | 181.2 | 140.0 | 36.1                                                            | 30.5  | 23.5  |
|                 |              |                      | Complex with SecB     | 78.4                                                | 64.0  | 51.1  | 3.8                                                             | 3.1   | 2.5   |
|                 |              |                      | Complex with TF (Tig) | 89.1                                                | 75.3  | 58.2  | 5.3                                                             | 4.5   | 3.5   |

| UniProtKB A. N. | Protein name | Subcellular location | Subunit               | $D_0 \left( \frac{\mu\text{m}^2}{\text{s}} \right)$ |       |       | $D_{\text{cyto}} \left( \frac{\mu\text{m}^2}{\text{s}} \right)$ |       |       |
|-----------------|--------------|----------------------|-----------------------|-----------------------------------------------------|-------|-------|-----------------------------------------------------------------|-------|-------|
|                 |              |                      |                       | 310 K                                               | 303 K | 293 K | 310 K                                                           | 303 K | 293 K |
| P77091          | HokE         | Membrane             | Monomer               | 217.1                                               | 183.4 | 141.7 | 36.9                                                            | 31.2  | 24.1  |
|                 |              |                      | Complex with SecB     | 78.4                                                | 64.1  | 51.2  | 3.8                                                             | 3.1   | 2.5   |
|                 |              |                      | Complex with TF (Tig) | 89.2                                                | 75.4  | 58.2  | 5.3                                                             | 4.5   | 3.5   |
| P28630          | HolA         |                      | Monomer               | 101.5                                               | 85.7  | 66.2  | 7.3                                                             | 6.1   | 4.7   |
| P28631          | HolB         |                      | Monomer               | 103.4                                               | 87.3  | 67.5  | 7.6                                                             | 6.4   | 4.9   |
| P28905          | HolC         |                      | Monomer               | 141.3                                               | 119.4 | 92.2  | 15.4                                                            | 13.0  | 10.0  |
| P28632          | HolD         |                      | Monomer               | 146.5                                               | 123.8 | 95.6  | 16.6                                                            | 14.0  | 10.8  |
| P0ABS8          | HolE         |                      | Monomer               | 181.0                                               | 152.9 | 118.1 | 25.8                                                            | 21.8  | 16.8  |
| P0A9M2          | Hpt          | Cytoplasm            | Monomer               | 131.2                                               | 110.8 | 85.6  | 13.1                                                            | 11.0  | 8.5   |
|                 |              |                      | Homotetramer          | 76.2                                                | 62.2  | 49.7  | 3.6                                                             | 2.9   | 2.3   |
| P43329          | HrpA         |                      | Monomer               | 59.8                                                | 50.5  | 39.0  | 1.9                                                             | 1.6   | 1.2   |
| P37024          | HrpB         |                      | Monomer               | 73.2                                                | 61.8  | 47.8  | 3.2                                                             | 2.7   | 2.1   |
| P54745          | HrsA         | Cell inner membrane  | Monomer               | 80.6                                                | 68.1  | 52.6  | 4.1                                                             | 3.5   | 2.7   |
|                 |              |                      | Complex with SecB     | 61.5                                                | 50.3  | 40.1  | 2.0                                                             | 1.6   | 1.3   |
|                 |              |                      | Complex with TF (Tig) | 65.6                                                | 55.4  | 42.8  | 2.4                                                             | 2.0   | 1.6   |
| P0A6Z1          | HscA         |                      | Monomer               | 82.5                                                | 69.7  | 53.8  | 4.4                                                             | 3.7   | 2.9   |
| P0A6L9          | HscB         |                      | Monomer               | 131.1                                               | 110.8 | 85.6  | 13.1                                                            | 11.0  | 8.5   |
| P77319          | HscC         |                      | Monomer               | 84.4                                                | 71.3  | 55.1  | 4.6                                                             | 3.9   | 3.0   |
| P08957          | HsdM         |                      | Monomer               | 85.9                                                | 72.5  | 56.0  | 4.8                                                             | 4.1   | 3.2   |
| P08956          | HsdR         |                      | Monomer               | 62.4                                                | 52.7  | 40.7  | 2.1                                                             | 1.8   | 1.4   |
| P05719          | HsdS         |                      | Monomer               | 90.8                                                | 76.7  | 59.3  | 5.5                                                             | 4.7   | 3.6   |
| P52644          | HslJ         |                      | Monomer               | 146.5                                               | 123.8 | 95.6  | 16.6                                                            | 14.0  | 10.8  |
| P0A6Y5          | HslO         | Cytoplasm            | Monomer               | 108.6                                               | 91.8  | 70.9  | 8.5                                                             | 7.2   | 5.6   |
| P0ACG8          | HslR         |                      | Monomer               | 145.3                                               | 122.8 | 94.8  | 16.3                                                            | 13.8  | 10.6  |
| P0A6H5          | HslU         | Cytoplasm            | Monomer               | 92.1                                                | 77.8  | 60.1  | 5.7                                                             | 4.9   | 3.7   |
|                 |              |                      | Homohexamer           | 45.6                                                | 37.3  | 29.8  | 0.8                                                             | 0.7   | 0.6   |
| P0A7B8          | HslV         | Cytoplasm            | Monomer               | 133.9                                               | 113.1 | 87.4  | 13.7                                                            | 11.5  | 8.9   |
|                 |              |                      | Homohexamer           | 66.3                                                | 54.2  | 43.3  | 2.5                                                             | 2.0   | 1.6   |
| P0AB20          | HspQ         | Cytoplasm            | Monomer               | 161.8                                               | 136.7 | 105.6 | 20.5                                                            | 17.3  | 13.4  |
| P31474          | HsrA         | Cell inner membrane  | Monomer               | 90.8                                                | 76.7  | 59.2  | 5.5                                                             | 4.7   | 3.6   |
|                 |              |                      | Complex with SecB     | 65.0                                                | 53.1  | 42.4  | 2.3                                                             | 1.9   | 1.5   |

| UniProtKB A. N. | Protein name | Subcellular location           | Subunit                 | $D_0 \left( \frac{\mu\text{m}^2}{\text{s}} \right)$ |       |       | $D_{\text{cyto}} \left( \frac{\mu\text{m}^2}{\text{s}} \right)$ |       |       |
|-----------------|--------------|--------------------------------|-------------------------|-----------------------------------------------------|-------|-------|-----------------------------------------------------------------|-------|-------|
|                 |              |                                |                         | 310 K                                               | 303 K | 293 K | 310 K                                                           | 303 K | 293 K |
|                 |              |                                | Complex with TF (Tig)   | 70.1                                                | 59.2  | 45.7  | 2.9                                                             | 2.4   | 1.9   |
| P28697          | HtgA         |                                | Monomer                 | 128.4                                               | 108.5 | 83.8  | 12.5                                                            | 10.5  | 8.1   |
| P0A6Z3          | HtpG         | Cytoplasm. Cell inner membrane | Monomer                 | 79.8                                                | 67.4  | 52.1  | 4.0                                                             | 3.4   | 2.6   |
|                 |              |                                | Homodimer               | 60.8                                                | 49.7  | 39.7  | 1.9                                                             | 1.6   | 1.3   |
|                 |              |                                | Monomer                 | 109.5                                               | 92.5  | 71.4  | 8.7                                                             | 7.3   | 5.7   |
| P23894          | HtpX         | Cell inner membrane            | Complex with SecB       | 69.7                                                | 56.9  | 45.5  | 2.8                                                             | 2.3   | 1.8   |
|                 |              |                                | Complex with TF (Tig)   | 76.3                                                | 64.5  | 49.8  | 3.6                                                             | 3.0   | 2.3   |
|                 |              |                                | Monomer                 | 105.1                                               | 88.8  | 68.6  | 7.9                                                             | 6.7   | 5.1   |
| P0ACV0          | HtrB         | Cell inner membrane            | Complex with SecB       | 68.8                                                | 56.2  | 44.9  | 2.7                                                             | 2.2   | 1.8   |
|                 |              |                                | Complex with TF (Tig)   | 75.0                                                | 63.4  | 49.0  | 3.4                                                             | 2.9   | 2.2   |
| P27375          | HtrC         |                                | Monomer                 | 128.7                                               | 108.7 | 84.0  | 12.5                                                            | 10.6  | 8.2   |
|                 |              |                                | Monomer                 | 71.2                                                | 60.2  | 46.5  | 3.0                                                             | 2.5   | 1.9   |
| P33129          | HtrE         | Cell outer membrane            | Complex with SecB       | 57.5                                                | 47.0  | 37.5  | 1.7                                                             | 1.4   | 1.1   |
|                 |              |                                | Complex with TF (Tig)   | 60.7                                                | 51.3  | 39.6  | 1.9                                                             | 1.6   | 1.3   |
| P25666          | HtrL         |                                | Monomer                 | 107.5                                               | 90.8  | 70.1  | 8.3                                                             | 7.0   | 5.4   |
|                 |              |                                | Monomer                 | 175.8                                               | 148.5 | 114.7 | 24.3                                                            | 20.5  | 15.9  |
| P0ACF0          | HupA         |                                | Heterodimer (HupA–HupB) | 134.8                                               | 113.9 | 88.0  | 13.9                                                            | 11.7  | 9.1   |
|                 |              |                                | Monomer                 | 178.1                                               | 150.4 | 116.2 | 24.9                                                            | 21.1  | 16.3  |
| P0ACF4          | HupB         |                                | Heterodimer (HupA–HupB) | 134.8                                               | 113.9 | 88.0  | 13.9                                                            | 11.7  | 9.1   |
|                 |              |                                | Monomer                 | 99.5                                                | 84.1  | 64.9  | 6.9                                                             | 5.9   | 4.5   |
| P69739          | HyaA         | Cell inner membrane            | Complex with SecB       | 67.4                                                | 55.1  | 44.0  | 2.6                                                             | 2.1   | 1.7   |
|                 |              |                                | Complex with TF (Tig)   | 73.3                                                | 61.9  | 47.8  | 3.2                                                             | 2.7   | 2.1   |
|                 |              |                                | Monomer                 | 82.2                                                | 69.5  | 53.6  | 4.3                                                             | 3.7   | 2.8   |
| P0ACD8          | HyaB         | Cell membrane                  | Complex with SecB       | 62.1                                                | 50.8  | 40.5  | 2.1                                                             | 1.7   | 1.3   |
|                 |              |                                | Complex with TF (Tig)   | 66.4                                                | 56.1  | 43.3  | 2.5                                                             | 2.1   | 1.6   |
|                 |              |                                | Monomer                 | 115.9                                               | 97.9  | 75.6  | 9.9                                                             | 8.4   | 6.5   |
| P0AAM1          | HyaC         | Cell inner membrane            | Complex with SecB       | 70.9                                                | 57.9  | 46.3  | 2.9                                                             | 2.4   | 1.9   |
|                 |              |                                | Complex with TF (Tig)   | 78.0                                                | 65.9  | 50.9  | 3.8                                                             | 3.2   | 2.5   |
| P19930          | HyaD         |                                | Monomer                 | 127.7                                               | 107.9 | 83.3  | 12.3                                                            | 10.4  | 8.0   |
| P19931          | HyaE         |                                | Monomer                 | 147.6                                               | 124.7 | 96.3  | 16.9                                                            | 14.3  | 11.0  |
| P19932          | HyaF         |                                | Monomer                 | 110.1                                               | 93.0  | 71.9  | 8.8                                                             | 7.4   | 5.7   |

| UniProtKB A. N. | Protein name | Subcellular location | Subunit               | $D_0 \left( \frac{\mu\text{m}^2}{\text{s}} \right)$ |       |       | $D_{\text{cyto}} \left( \frac{\mu\text{m}^2}{\text{s}} \right)$ |       |       |
|-----------------|--------------|----------------------|-----------------------|-----------------------------------------------------|-------|-------|-----------------------------------------------------------------|-------|-------|
|                 |              |                      |                       | 310 K                                               | 303 K | 293 K | 310 K                                                           | 303 K | 293 K |
| P0AAJ8          | HybA         | Periplasm            | Monomer               | 104.4                                               | 88.2  | 68.1  | 7.8                                                             | 6.6   | 5.1   |
|                 |              |                      | Complex with SecB     | 68.6                                                | 56.0  | 44.8  | 2.7                                                             | 2.2   | 1.8   |
|                 |              |                      | Complex with TF (Tig) | 74.8                                                | 63.2  | 48.8  | 3.4                                                             | 2.9   | 2.2   |
| P37180          | HybB         | Cell inner membrane  | Monomer               | 96.9                                                | 81.8  | 63.2  | 6.5                                                             | 5.5   | 4.2   |
|                 |              |                      | Complex with SecB     | 66.8                                                | 54.5  | 43.6  | 2.5                                                             | 2.1   | 1.6   |
|                 |              |                      | Complex with TF (Tig) | 72.3                                                | 61.1  | 47.2  | 3.1                                                             | 2.6   | 2.0   |
| P0ACE0          | HybC         | Cell membrane        | Monomer               | 84.1                                                | 71.1  | 54.9  | 4.6                                                             | 3.9   | 3.0   |
|                 |              |                      | Complex with SecB     | 62.8                                                | 51.3  | 41.0  | 2.1                                                             | 1.7   | 1.4   |
|                 |              |                      | Complex with TF (Tig) | 67.2                                                | 56.8  | 43.9  | 2.6                                                             | 2.2   | 1.7   |
| P37182          | HybD         |                      | Monomer               | 137.8                                               | 116.4 | 89.9  | 14.5                                                            | 12.3  | 9.5   |
| P0AAN1          | HybE         |                      | Monomer               | 137.1                                               | 115.8 | 89.5  | 14.4                                                            | 12.2  | 9.4   |
| P0A703          | HybF         |                      | Monomer               | 157.1                                               | 132.7 | 102.5 | 19.3                                                            | 16.3  | 12.6  |
| P0AAM7          | HybG         |                      | Monomer               | 181.3                                               | 153.2 | 118.3 | 25.9                                                            | 21.9  | 16.9  |
| P69741          | HybO         | Cell membrane        | Monomer               | 100.5                                               | 84.9  | 65.6  | 7.1                                                             | 6.0   | 4.6   |
|                 |              |                      | Complex with SecB     | 67.7                                                | 55.3  | 44.2  | 2.6                                                             | 2.1   | 1.7   |
|                 |              |                      | Complex with TF (Tig) | 73.6                                                | 62.2  | 48.0  | 3.3                                                             | 2.8   | 2.1   |
| P0AEV4          | HycA         |                      | Monomer               | 138.1                                               | 116.7 | 90.1  | 14.6                                                            | 12.4  | 9.5   |
| P0AAK1          | HycB         |                      | Monomer               | 126.9                                               | 107.2 | 82.8  | 12.1                                                            | 10.3  | 7.9   |
| P16429          | HycC         | Cell inner membrane  | Monomer               | 83.3                                                | 70.4  | 54.4  | 4.5                                                             | 3.8   | 2.9   |
|                 |              |                      | Complex with SecB     | 62.5                                                | 51.1  | 40.8  | 2.1                                                             | 1.7   | 1.4   |
|                 |              |                      | Complex with TF (Tig) | 66.9                                                | 56.5  | 43.6  | 2.5                                                             | 2.1   | 1.6   |
| P16430          | HycD         | Cell inner membrane  | Monomer               | 108.0                                               | 91.2  | 70.5  | 8.4                                                             | 7.1   | 5.5   |
|                 |              |                      | Complex with SecB     | 69.4                                                | 56.7  | 45.3  | 2.8                                                             | 2.3   | 1.8   |
|                 |              |                      | Complex with TF (Tig) | 75.9                                                | 64.1  | 49.5  | 3.5                                                             | 3.0   | 2.3   |
| P16431          | HycE         |                      | Monomer               | 82.8                                                | 70.0  | 54.1  | 4.4                                                             | 3.7   | 2.9   |
| P16432          | HycF         |                      | Monomer               | 130.7                                               | 110.4 | 85.3  | 13.0                                                            | 10.9  | 8.5   |
| P16433          | HycG         |                      | Monomer               | 115.2                                               | 97.3  | 75.2  | 9.8                                                             | 8.2   | 6.4   |
| P0AEV7          | HycH         |                      | Monomer               | 145.4                                               | 122.8 | 94.9  | 16.3                                                            | 13.8  | 10.7  |
| P0AEV9          | HycI         |                      | Monomer               | 139.9                                               | 118.2 | 91.3  | 15.0                                                            | 12.7  | 9.8   |
| P0AAK4          | HydN         |                      | Monomer               | 134.1                                               | 113.3 | 87.5  | 13.7                                                            | 11.6  | 8.9   |
| P23481          | HyfA         |                      | Monomer               | 126.3                                               | 106.7 | 82.4  | 12.0                                                            | 10.1  | 7.8   |



| UniProtKB A. N. | Protein name | Subcellular location | Subunit               | $D_0 \left( \frac{\mu\text{m}^2}{\text{s}} \right)$ |       |       | $D_{\text{cyto}} \left( \frac{\mu\text{m}^2}{\text{s}} \right)$ |       |       |
|-----------------|--------------|----------------------|-----------------------|-----------------------------------------------------|-------|-------|-----------------------------------------------------------------|-------|-------|
|                 |              |                      |                       | 310 K                                               | 303 K | 293 K | 310 K                                                           | 303 K | 293 K |
| P23482          | HyfB         | Cell inner membrane  | Monomer               | 79.3                                                | 67.0  | 51.8  | 4.0                                                             | 3.3   | 2.6   |
|                 |              |                      | Complex with SecB     | 61.0                                                | 49.9  | 39.8  | 2.0                                                             | 1.6   | 1.3   |
|                 |              |                      | Complex with TF (Tig) | 65.0                                                | 54.9  | 42.4  | 2.3                                                             | 2.0   | 1.5   |
| P77858          | HyfC         | Cell inner membrane  | Monomer               | 106.3                                               | 89.8  | 69.4  | 8.1                                                             | 6.8   | 5.3   |
|                 |              |                      | Complex with SecB     | 69.0                                                | 56.4  | 45.0  | 2.7                                                             | 2.2   | 1.8   |
|                 |              |                      | Complex with TF (Tig) | 75.4                                                | 63.7  | 49.2  | 3.5                                                             | 2.9   | 2.3   |
| P77416          | HyfD         | Cell inner membrane  | Monomer               | 90.6                                                | 76.5  | 59.1  | 5.5                                                             | 4.7   | 3.6   |
|                 |              |                      | Complex with SecB     | 64.9                                                | 53.1  | 42.4  | 2.3                                                             | 1.9   | 1.5   |
|                 |              |                      | Complex with TF (Tig) | 70.0                                                | 59.1  | 45.7  | 2.8                                                             | 2.4   | 1.9   |
| P0AEW1          | HyfE         | Cell inner membrane  | Monomer               | 123.7                                               | 104.5 | 80.7  | 11.5                                                            | 9.7   | 7.5   |
|                 |              |                      | Complex with SecB     | 72.1                                                | 58.9  | 47.1  | 3.1                                                             | 2.5   | 2.0   |
|                 |              |                      | Complex with TF (Tig) | 79.8                                                | 67.4  | 52.1  | 4.0                                                             | 3.4   | 2.6   |
| P77437          | HyfF         | Cell inner membrane  | Monomer               | 87.3                                                | 73.8  | 57.0  | 5.0                                                             | 4.3   | 3.3   |
|                 |              |                      | Complex with SecB     | 63.9                                                | 52.2  | 41.7  | 2.2                                                             | 1.8   | 1.5   |
|                 |              |                      | Complex with TF (Tig) | 68.6                                                | 58.0  | 44.8  | 2.7                                                             | 2.3   | 1.8   |
| P77329          | HyfG         |                      | Monomer               | 83.6                                                | 70.7  | 54.6  | 4.5                                                             | 3.8   | 3.0   |
| P77423          | HyfH         |                      | Monomer               | 131.1                                               | 110.7 | 85.5  | 13.0                                                            | 11.0  | 8.5   |
| P77668          | HyfI         |                      | Monomer               | 115.1                                               | 97.2  | 75.1  | 9.7                                                             | 8.2   | 6.3   |
| P77453          | HyfJ         |                      | Monomer               | 145.0                                               | 122.5 | 94.6  | 16.2                                                            | 13.7  | 10.6  |
| P71229          | HyfR         |                      | Monomer               | 78.2                                                | 66.1  | 51.0  | 3.8                                                             | 3.2   | 2.5   |
| P30147          | Hyi          |                      | Monomer               | 113.1                                               | 95.5  | 73.8  | 9.3                                                             | 7.9   | 6.1   |
|                 |              |                      | Homodimer             | 86.2                                                | 70.4  | 56.2  | 4.9                                                             | 4.0   | 3.2   |
| P0A700          | HypA         |                      | Monomer               | 154.9                                               | 130.8 | 101.1 | 18.7                                                            | 15.8  | 12.2  |
| P0AAN3          | HypB         |                      | Monomer               | 109.9                                               | 92.9  | 71.7  | 8.8                                                             | 7.4   | 5.7   |
| P0AAM3          | HypC         |                      | Monomer               | 174.4                                               | 147.3 | 113.8 | 23.9                                                            | 20.2  | 15.6  |
| P24192          | HypD         |                      | Monomer               | 98.9                                                | 83.5  | 64.5  | 6.8                                                             | 5.8   | 4.5   |
| P24193          | HypE         |                      | Monomer               | 105.5                                               | 89.1  | 68.8  | 7.9                                                             | 6.7   | 5.2   |
| P30131          | HypF         |                      | Monomer               | 75.6                                                | 63.9  | 49.3  | 3.5                                                             | 2.9   | 2.3   |
| Q46806          | HyuA         |                      | Monomer               | 91.1                                                | 76.9  | 59.4  | 5.6                                                             | 4.7   | 3.6   |
|                 |              |                      | Homotetramer          | 52.9                                                | 43.2  | 34.5  | 1.3                                                             | 1.1   | 0.9   |
| P37595          | IaaA         | nie wiadomo co       | Monomer               | 107.5                                               | 90.8  | 70.2  | 8.3                                                             | 7.0   | 5.4   |

| UniProtKB A. N. | Protein name | Subcellular location | Subunit               | $D_0 \left( \frac{\mu\text{m}^2}{\text{s}} \right)$ |       |       | $D_{\text{cyto}} \left( \frac{\mu\text{m}^2}{\text{s}} \right)$ |       |       |
|-----------------|--------------|----------------------|-----------------------|-----------------------------------------------------|-------|-------|-----------------------------------------------------------------|-------|-------|
|                 |              |                      |                       | 310 K                                               | 303 K | 293 K | 310 K                                                           | 303 K | 293 K |
|                 |              |                      | Complex with SecB     | 69.3                                                | 56.6  | 45.2  | 2.8                                                             | 2.3   | 1.8   |
|                 |              |                      | Complex with TF (Tig) | 75.8                                                | 64.0  | 49.4  | 3.5                                                             | 3.0   | 2.3   |
| P39377          | IadA         | Cytoplasm            | Monomer               | 99.1                                                | 83.8  | 64.7  | 6.9                                                             | 5.8   | 4.5   |
| P10423          | Iap          |                      | Monomer               | 102.3                                               | 86.4  | 66.8  | 7.4                                                             | 6.3   | 4.8   |
| P0C054          | IbpA         | Cytoplasm            | Monomer               | 144.3                                               | 121.9 | 94.2  | 16.1                                                            | 13.6  | 10.5  |
|                 |              |                      | Homooligomer          | 23.7                                                | 20.0  | 15.5  | 0.1                                                             | 0.1   | 0.1   |
| P0C058          | IbpB         | Cytoplasm            | Monomer               | 143.2                                               | 120.9 | 93.4  | 15.8                                                            | 13.4  | 10.3  |
|                 |              |                      | Homodimer             | 109.1                                               | 89.1  | 71.2  | 8.6                                                             | 7.0   | 5.6   |
|                 |              |                      | Homooligomer          | 23.5                                                | 19.9  | 15.4  | 0.1                                                             | 0.1   | 0.1   |
| C1P607          | IbsA         |                      | Monomer               | 310.6                                               | 262.4 | 202.7 | 71.5                                                            | 60.4  | 46.7  |
| C1P608          | IbsB         |                      | Monomer               | 320.2                                               | 270.5 | 209.0 | 75.5                                                            | 63.8  | 49.3  |
| C1P615          | IbsC         |                      | Monomer               | 311.8                                               | 263.4 | 203.5 | 72.0                                                            | 60.9  | 47.0  |
|                 |              |                      | Monomer               | 315.1                                               | 266.2 | 205.6 | 73.4                                                            | 62.0  | 47.9  |
| C1P616          | IbsD         | Membrane             | Complex with SecB     | 79.9                                                | 65.3  | 52.1  | 4.0                                                             | 3.3   | 2.6   |
|                 |              |                      | Complex with TF (Tig) | 91.6                                                | 77.3  | 59.7  | 5.7                                                             | 4.8   | 3.7   |
| C1P617          | IbsE         |                      | Monomer               | 311.9                                               | 263.5 | 203.6 | 72.1                                                            | 60.9  | 47.0  |
| P0AEW4          | Icc          |                      | Monomer               | 110.8                                               | 93.6  | 72.3  | 8.9                                                             | 7.5   | 5.8   |
| P08200          | Icd          |                      | Monomer               | 95.0                                                | 80.3  | 62.0  | 6.2                                                             | 5.2   | 4.0   |
|                 |              |                      | Homodimer             | 72.4                                                | 59.2  | 47.3  | 3.1                                                             | 2.6   | 2.0   |
| P0A8S1          | IciA         |                      | Monomer               | 107.4                                               | 90.8  | 70.1  | 8.3                                                             | 7.0   | 5.4   |
|                 |              |                      | Homodimer             | 81.9                                                | 66.9  | 53.4  | 4.3                                                             | 3.5   | 2.8   |
|                 |              |                      | Monomer               | 112.5                                               | 95.1  | 73.4  | 9.2                                                             | 7.8   | 6.0   |
| P16528          | IclR         |                      | Homodimer             | 85.8                                                | 70.1  | 56.0  | 4.8                                                             | 3.9   | 3.1   |
|                 |              |                      | Homotetramer          | 65.4                                                | 55.2  | 42.6  | 2.4                                                             | 2.0   | 1.5   |
| Q46822          | Idi          | Cytoplasm            | Monomer               | 130.2                                               | 110.0 | 85.0  | 12.8                                                            | 10.9  | 8.4   |
|                 |              |                      | Homodimer             | 99.2                                                | 81.0  | 64.7  | 6.9                                                             | 5.6   | 4.5   |
| P39346          | IdnD         |                      | Monomer               | 103.1                                               | 87.1  | 67.3  | 7.5                                                             | 6.4   | 4.9   |
| P39208          | IdnK         |                      | Monomer               | 129.0                                               | 109.0 | 84.2  | 12.6                                                            | 10.6  | 8.2   |
| P0A9P9          | IdnO         | Cytoplasm            | Monomer               | 115.9                                               | 97.9  | 75.7  | 9.9                                                             | 8.4   | 6.5   |
| P39343          | IdnR         |                      | Monomer               | 102.7                                               | 86.8  | 67.0  | 7.5                                                             | 6.3   | 4.9   |
| P39344          | IdnT         | Cell inner membrane  | Monomer               | 94.8                                                | 80.1  | 61.9  | 6.2                                                             | 5.2   | 4.0   |

| UniProtKB A. N. | Protein name | Subcellular location | Subunit                 | $D_0 \left( \frac{\mu\text{m}^2}{\text{s}} \right)$ |       |       | $D_{\text{cyto}} \left( \frac{\mu\text{m}^2}{\text{s}} \right)$ |       |       |
|-----------------|--------------|----------------------|-------------------------|-----------------------------------------------------|-------|-------|-----------------------------------------------------------------|-------|-------|
|                 |              |                      |                         | 310 K                                               | 303 K | 293 K | 310 K                                                           | 303 K | 293 K |
|                 |              |                      | Complex with SecB       | 66.2                                                | 54.1  | 43.2  | 2.5                                                             | 2.0   | 1.6   |
|                 |              |                      | Complex with TF (Tig)   | 71.6                                                | 60.5  | 46.7  | 3.0                                                             | 2.6   | 2.0   |
| P0A6X7          | IhfA         |                      | Monomer                 | 164.1                                               | 138.7 | 107.1 | 21.1                                                            | 17.8  | 13.8  |
|                 |              |                      | Heterodimer (IhfA–IhfB) | 126.6                                               | 107.0 | 82.6  | 12.1                                                            | 10.2  | 7.9   |
| P0A6Y1          | IhfB         |                      | Monomer                 | 168.3                                               | 142.2 | 109.8 | 22.2                                                            | 18.8  | 14.5  |
|                 |              |                      | Heterodimer (IhfA–IhfB) | 126.6                                               | 107.0 | 82.6  | 12.1                                                            | 10.2  | 7.9   |
| P00956          | IleS         | Cytoplasm            | Monomer                 | 68.8                                                | 58.1  | 44.9  | 2.7                                                             | 2.3   | 1.8   |
| P04968          | IlvA         |                      | Monomer                 | 87.7                                                | 74.1  | 57.2  | 5.1                                                             | 4.3   | 3.3   |
|                 |              |                      | Homotetramer            | 50.9                                                | 41.6  | 33.2  | 1.2                                                             | 1.0   | 0.8   |
| P08142          | IlvB         |                      | Monomer                 | 85.2                                                | 72.0  | 55.6  | 4.7                                                             | 4.0   | 3.1   |
| P05793          | IlvC         |                      | Monomer                 | 89.0                                                | 75.2  | 58.1  | 5.3                                                             | 4.5   | 3.4   |
| P05791          | IlvD         |                      | Monomer                 | 82.6                                                | 69.8  | 53.9  | 4.4                                                             | 3.7   | 2.9   |
|                 |              |                      | Homodimer               | 62.9                                                | 51.4  | 41.1  | 2.1                                                             | 1.7   | 1.4   |
| P0AB80          | IlvE         |                      | Monomer                 | 106.7                                               | 90.1  | 69.6  | 8.2                                                             | 6.9   | 5.3   |
|                 |              |                      | Homoheptamer            | 52.8                                                | 43.2  | 34.5  | 1.3                                                             | 1.1   | 0.9   |
| P00892          | IlvG         |                      | Monomer                 | 85.9                                                | 72.5  | 56.0  | 4.8                                                             | 4.1   | 3.2   |
| P00894          | IlvH         |                      | Monomer                 | 137.1                                               | 115.8 | 89.5  | 14.4                                                            | 12.2  | 9.4   |
| P00893          | IlvI         |                      | Monomer                 | 83.9                                                | 70.8  | 54.7  | 4.6                                                             | 3.8   | 3.0   |
| P62522          | IlvL         |                      | Monomer                 | 268.6                                               | 227.0 | 175.3 | 55.1                                                            | 46.5  | 36.0  |
| P0ADG1          | IlvM         |                      | Monomer                 | 174.6                                               | 147.5 | 113.9 | 24.0                                                            | 20.2  | 15.6  |
| P0ADF8          | IlvN         |                      | Monomer                 | 165.6                                               | 139.9 | 108.0 | 21.5                                                            | 18.2  | 14.0  |
| C1P619          | IlvX         |                      | Monomer                 | 330.1                                               | 278.9 | 215.4 | 79.6                                                            | 67.3  | 52.0  |
| P05827          | IlvY         | Cytoplasm            | Monomer                 | 107.8                                               | 91.1  | 70.3  | 8.4                                                             | 7.1   | 5.5   |
| P27294          | InaA         |                      | Monomer                 | 119.9                                               | 101.3 | 78.2  | 10.7                                                            | 9.0   | 7.0   |
| P69222          | InfA         | Cytoplasm            | Monomer                 | 186.0                                               | 157.2 | 121.4 | 27.2                                                            | 23.0  | 17.8  |
| P0A705          | InfB         | Cytoplasm            | Monomer                 | 70.7                                                | 59.7  | 46.1  | 2.9                                                             | 2.5   | 1.9   |
| P0A707          | InfC         | Cytoplasm            | Monomer                 | 130.0                                               | 109.9 | 84.9  | 12.8                                                            | 10.8  | 8.4   |
| P0CF07          | InsA1        |                      | Monomer                 | 173.4                                               | 146.5 | 113.2 | 23.6                                                            | 20.0  | 15.4  |
| P0CF08          | InsA2        |                      | Monomer                 | 173.2                                               | 146.3 | 113.0 | 23.6                                                            | 19.9  | 15.4  |
| P0CF09          | InsA3        |                      | Monomer                 | 173.2                                               | 146.3 | 113.0 | 23.6                                                            | 19.9  | 15.4  |
| P0CF10          | InsA4        |                      | Monomer                 | 173.2                                               | 146.3 | 113.0 | 23.6                                                            | 19.9  | 15.4  |

| UniProtKB A. N. | Protein name | Subcellular location | Subunit | $D_0 \left( \frac{\mu\text{m}^2}{\text{s}} \right)$ |       |       | $D_{\text{cyto}} \left( \frac{\mu\text{m}^2}{\text{s}} \right)$ |       |       |
|-----------------|--------------|----------------------|---------|-----------------------------------------------------|-------|-------|-----------------------------------------------------------------|-------|-------|
|                 |              |                      |         | 310 K                                               | 303 K | 293 K | 310 K                                                           | 303 K | 293 K |
| P0CF11          | InsA5        |                      | Monomer | 173.4                                               | 146.5 | 113.2 | 23.6                                                            | 20.0  | 15.4  |
| P0CF12          | InsA6        |                      | Monomer | 173.4                                               | 146.5 | 113.2 | 23.6                                                            | 20.0  | 15.4  |
| P19767          | InsA7        |                      | Monomer | 173.0                                               | 146.2 | 112.9 | 23.5                                                            | 19.9  | 15.4  |
| P0CF25          | InsB1        |                      | Monomer | 132.6                                               | 112.0 | 86.5  | 13.4                                                            | 11.3  | 8.7   |
| P0CF26          | InsB2        |                      | Monomer | 132.1                                               | 111.6 | 86.2  | 13.3                                                            | 11.2  | 8.7   |
| P0CF27          | InsB3        |                      | Monomer | 132.1                                               | 111.6 | 86.2  | 13.3                                                            | 11.2  | 8.7   |
| P57998          | InsB4        |                      | Monomer | 132.3                                               | 111.7 | 86.3  | 13.3                                                            | 11.2  | 8.7   |
| P0CF28          | InsB5        |                      | Monomer | 132.6                                               | 112.0 | 86.5  | 13.4                                                            | 11.3  | 8.7   |
| P0CF29          | InsB6        |                      | Monomer | 132.6                                               | 112.0 | 86.5  | 13.4                                                            | 11.3  | 8.7   |
| P0CF40          | InsC1        |                      | Monomer | 153.6                                               | 129.8 | 100.2 | 18.4                                                            | 15.5  | 12.0  |
| P0CF41          | InsC2        |                      | Monomer | 153.6                                               | 129.8 | 100.2 | 18.4                                                            | 15.5  | 12.0  |
| P0CF42          | InsC3        |                      | Monomer | 153.6                                               | 129.8 | 100.2 | 18.4                                                            | 15.5  | 12.0  |
| P0CF43          | InsC4        |                      | Monomer | 153.6                                               | 129.8 | 100.2 | 18.4                                                            | 15.5  | 12.0  |
| P0CF44          | InsC5        |                      | Monomer | 153.6                                               | 129.8 | 100.2 | 18.4                                                            | 15.5  | 12.0  |
| P0CF45          | InsC6        |                      | Monomer | 153.6                                               | 129.8 | 100.2 | 18.4                                                            | 15.5  | 12.0  |
| P0CF53          | InsD1        |                      | Monomer | 106.3                                               | 89.8  | 69.4  | 8.1                                                             | 6.8   | 5.3   |
| P0CF54          | InsD2        |                      | Monomer | 106.3                                               | 89.8  | 69.4  | 8.1                                                             | 6.8   | 5.3   |
| P0CF55          | InsD3        |                      | Monomer | 106.3                                               | 89.8  | 69.4  | 8.1                                                             | 6.8   | 5.3   |
| P0CF56          | InsD4        |                      | Monomer | 106.3                                               | 89.8  | 69.4  | 8.1                                                             | 6.8   | 5.3   |
| P0CF57          | InsD5        |                      | Monomer | 106.3                                               | 89.8  | 69.4  | 8.1                                                             | 6.8   | 5.3   |
| P0CF58          | InsD6        |                      | Monomer | 106.3                                               | 89.8  | 69.4  | 8.1                                                             | 6.8   | 5.3   |
| P0CF60          | InsD8        |                      | Monomer | 121.0                                               | 102.2 | 78.9  | 10.9                                                            | 9.2   | 7.1   |
| P0CF66          | InsE1        |                      | Monomer | 163.1                                               | 137.8 | 106.4 | 20.8                                                            | 17.6  | 13.6  |
| P0CF67          | InsE2        |                      | Monomer | 163.1                                               | 137.8 | 106.4 | 20.8                                                            | 17.6  | 13.6  |
| P0CF68          | InsE3        |                      | Monomer | 163.1                                               | 137.8 | 106.4 | 20.8                                                            | 17.6  | 13.6  |
| P0CF69          | InsE4        |                      | Monomer | 163.1                                               | 137.8 | 106.4 | 20.8                                                            | 17.6  | 13.6  |
| P0CF70          | InsE5        |                      | Monomer | 163.1                                               | 137.8 | 106.4 | 20.8                                                            | 17.6  | 13.6  |
| P0CF79          | InsF1        |                      | Monomer | 107.4                                               | 90.7  | 70.1  | 8.3                                                             | 7.0   | 5.4   |
| P0CF80          | InsF2        |                      | Monomer | 107.4                                               | 90.7  | 70.1  | 8.3                                                             | 7.0   | 5.4   |
| P0CF81          | InsF3        |                      | Monomer | 107.4                                               | 90.7  | 70.1  | 8.3                                                             | 7.0   | 5.4   |
| P0CF82          | InsF4        |                      | Monomer | 107.4                                               | 90.7  | 70.1  | 8.3                                                             | 7.0   | 5.4   |

| UniProtKB A. N. | Protein name | Subcellular location | Subunit | $D_0 \left( \frac{\mu\text{m}^2}{\text{s}} \right)$ |       |       | $D_{\text{cyto}} \left( \frac{\mu\text{m}^2}{\text{s}} \right)$ |       |       |
|-----------------|--------------|----------------------|---------|-----------------------------------------------------|-------|-------|-----------------------------------------------------------------|-------|-------|
|                 |              |                      |         | 310 K                                               | 303 K | 293 K | 310 K                                                           | 303 K | 293 K |
| P0CF83          | InsF5        |                      | Monomer | 107.4                                               | 90.7  | 70.1  | 8.3                                                             | 7.0   | 5.4   |
| P03835          | InsG         |                      | Monomer | 91.5                                                | 77.3  | 59.7  | 5.7                                                             | 4.8   | 3.7   |
| P0CE49          | InsH1        |                      | Monomer | 100.9                                               | 85.2  | 65.8  | 7.2                                                             | 6.0   | 4.7   |
| P0CE57          | InsH10       |                      | Monomer | 100.9                                               | 85.2  | 65.8  | 7.2                                                             | 6.0   | 4.7   |
| P0CE58          | InsH11       |                      | Monomer | 100.9                                               | 85.2  | 65.8  | 7.2                                                             | 6.0   | 4.7   |
| P0CE50          | InsH2        |                      | Monomer | 100.9                                               | 85.2  | 65.8  | 7.2                                                             | 6.0   | 4.7   |
| P0CE51          | InsH3        |                      | Monomer | 100.9                                               | 85.2  | 65.8  | 7.2                                                             | 6.0   | 4.7   |
| P0CE52          | InsH4        |                      | Monomer | 100.9                                               | 85.2  | 65.8  | 7.2                                                             | 6.0   | 4.7   |
| P76071          | InsH5        |                      | Monomer | 102.5                                               | 86.6  | 66.9  | 7.4                                                             | 6.3   | 4.8   |
| P0CE53          | InsH6        |                      | Monomer | 101.0                                               | 85.3  | 65.9  | 7.2                                                             | 6.1   | 4.7   |
| P0CE54          | InsH7        |                      | Monomer | 100.9                                               | 85.2  | 65.8  | 7.2                                                             | 6.0   | 4.7   |
| P0CE55          | InsH8        |                      | Monomer | 100.9                                               | 85.2  | 65.8  | 7.2                                                             | 6.0   | 4.7   |
| P0CE56          | InsH9        |                      | Monomer | 100.9                                               | 85.2  | 65.8  | 7.2                                                             | 6.0   | 4.7   |
| P0CF88          | InsI1        |                      | Monomer | 96.3                                                | 81.3  | 62.8  | 6.4                                                             | 5.4   | 4.2   |
| P0CF89          | InsI3        |                      | Monomer | 96.3                                                | 81.3  | 62.8  | 6.4                                                             | 5.4   | 4.2   |
| P0CF90          | InsI4        |                      | Monomer | 96.3                                                | 81.3  | 62.8  | 6.4                                                             | 5.4   | 4.2   |
| P19768          | InsJ         |                      | Monomer | 132.2                                               | 111.7 | 86.3  | 13.3                                                            | 11.2  | 8.7   |
| P19769          | InsK         |                      | Monomer | 107.4                                               | 90.8  | 70.1  | 8.3                                                             | 7.0   | 5.4   |
| P0CF91          | InsL1        |                      | Monomer | 99.3                                                | 83.9  | 64.8  | 6.9                                                             | 5.8   | 4.5   |
| P0CF92          | InsL2        |                      | Monomer | 99.3                                                | 83.9  | 64.8  | 6.9                                                             | 5.8   | 4.5   |
| P0CF93          | InsL3        |                      | Monomer | 99.3                                                | 83.9  | 64.8  | 6.9                                                             | 5.8   | 4.5   |
| P75679          | InsN1        |                      | Monomer | 146.2                                               | 123.5 | 95.4  | 16.5                                                            | 14.0  | 10.8  |
| P39212          | InsN2        |                      | Monomer | 163.0                                               | 137.7 | 106.4 | 20.8                                                            | 17.6  | 13.6  |
| P75680          | InsO1        |                      | Monomer | 144.0                                               | 121.7 | 94.0  | 16.0                                                            | 13.5  | 10.4  |
| Q47718          | InsO2        |                      | Monomer | 126.1                                               | 106.5 | 82.3  | 12.0                                                            | 10.1  | 7.8   |
| P76102          | InsQ         |                      | Monomer | 97.1                                                | 82.0  | 63.3  | 6.5                                                             | 5.5   | 4.3   |
| P32053          | IntA         |                      | Monomer | 94.3                                                | 79.7  | 61.6  | 6.1                                                             | 5.1   | 4.0   |
| P39347          | IntB         |                      | Monomer | 95.2                                                | 80.4  | 62.1  | 6.2                                                             | 5.3   | 4.1   |
| P24218          | IntD         |                      | Monomer | 95.6                                                | 80.8  | 62.4  | 6.3                                                             | 5.3   | 4.1   |
| P75969          | IntE         |                      | Monomer | 97.6                                                | 82.4  | 63.7  | 6.6                                                             | 5.6   | 4.3   |
| P71298          | IntF         |                      | Monomer | 89.7                                                | 75.8  | 58.5  | 5.4                                                             | 4.5   | 3.5   |

| UniProtKB A. N. | Protein name | Subcellular location | Subunit               | $D_0 \left( \frac{\mu\text{m}^2}{\text{s}} \right)$ |       |       | $D_{\text{cyto}} \left( \frac{\mu\text{m}^2}{\text{s}} \right)$ |       |       |
|-----------------|--------------|----------------------|-----------------------|-----------------------------------------------------|-------|-------|-----------------------------------------------------------------|-------|-------|
|                 |              |                      |                       | 310 K                                               | 303 K | 293 K | 310 K                                                           | 303 K | 293 K |
| P76323          | IntG         |                      | Monomer               | 167.8                                               | 141.8 | 109.5 | 22.1                                                            | 18.7  | 14.4  |
| P76168          | IntQ         |                      | Monomer               | 96.8                                                | 81.8  | 63.2  | 6.5                                                             | 5.5   | 4.2   |
| P76056          | IntR         |                      | Monomer               | 93.6                                                | 79.1  | 61.1  | 6.0                                                             | 5.1   | 3.9   |
| P37326          | IntS         |                      | Monomer               | 96.5                                                | 81.5  | 62.9  | 6.4                                                             | 5.4   | 4.2   |
| P76542          | IntZ         |                      | Monomer               | 95.4                                                | 80.6  | 62.2  | 6.3                                                             | 5.3   | 4.1   |
| P39375          | IraD         | Cytoplasm            | Monomer               | 148.1                                               | 125.2 | 96.7  | 17.0                                                            | 14.4  | 11.1  |
| P75987          | IraM         | Cytoplasm            | Monomer               | 159.9                                               | 135.1 | 104.4 | 20.0                                                            | 16.9  | 13.0  |
| P0AAN9          | IraP         | Cytoplasm            | Monomer               | 172.9                                               | 146.1 | 112.9 | 23.5                                                            | 19.9  | 15.3  |
| P0AAC8          | IscA         |                      | Monomer               | 163.0                                               | 137.7 | 106.4 | 20.8                                                            | 17.6  | 13.6  |
|                 |              |                      | Homodimer             | 124.2                                               | 101.5 | 81.1  | 11.6                                                            | 9.5   | 7.6   |
|                 |              |                      | Homotetramer          | 94.7                                                | 80.0  | 61.8  | 6.1                                                             | 5.2   | 4.0   |
| P0AGK8          | IscR         |                      | Monomer               | 139.0                                               | 117.5 | 90.7  | 14.8                                                            | 12.5  | 9.7   |
| P0A6B7          | IscS         | Cytoplasm            | Monomer               | 95.6                                                | 80.8  | 62.4  | 6.3                                                             | 5.3   | 4.1   |
|                 |              |                      | Homodimer             | 72.8                                                | 59.5  | 47.5  | 3.2                                                             | 2.6   | 2.1   |
| P0C0L9          | IscX         |                      | Monomer               | 190.8                                               | 161.2 | 124.5 | 28.7                                                            | 24.2  | 18.7  |
| P22939          | IspA         | Cytoplasm            | Monomer               | 109.1                                               | 92.2  | 71.2  | 8.6                                                             | 7.3   | 5.6   |
| P0AD57          | IspB         |                      | Monomer               | 105.3                                               | 89.0  | 68.7  | 7.9                                                             | 6.7   | 5.2   |
| Q46893          | IspD         |                      | Monomer               | 119.1                                               | 100.6 | 77.7  | 10.5                                                            | 8.9   | 6.9   |
|                 |              |                      | Homodimer             | 90.8                                                | 74.1  | 59.2  | 5.5                                                             | 4.5   | 3.6   |
| P62615          | IspE         |                      | Monomer               | 110.8                                               | 93.6  | 72.3  | 8.9                                                             | 7.5   | 5.8   |
|                 |              |                      | Homodimer             | 84.5                                                | 69.0  | 55.1  | 4.6                                                             | 3.8   | 3.0   |
| P62617          | IspF         |                      | Monomer               | 140.4                                               | 118.7 | 91.7  | 15.2                                                            | 12.8  | 9.9   |
|                 |              |                      | Homotrimer            | 91.3                                                | 74.6  | 59.6  | 5.6                                                             | 4.6   | 3.7   |
| P62620          | IspG         |                      | Monomer               | 99.5                                                | 84.1  | 64.9  | 6.9                                                             | 5.9   | 4.5   |
| P62623          | IspH         |                      | Monomer               | 105.8                                               | 89.4  | 69.1  | 8.0                                                             | 6.8   | 5.2   |
|                 |              |                      | Homodimer             | 80.7                                                | 65.9  | 52.6  | 4.1                                                             | 3.4   | 2.7   |
| P0A710          | IspZ         | Cell inner membrane  | Monomer               | 129.5                                               | 109.4 | 84.5  | 12.7                                                            | 10.7  | 8.3   |
|                 |              |                      | Complex with SecB     | 72.9                                                | 59.6  | 47.6  | 3.2                                                             | 2.6   | 2.1   |
|                 |              |                      | Complex with TF (Tig) | 80.9                                                | 68.4  | 52.8  | 4.2                                                             | 3.5   | 2.7   |
| P03061          | IvbL         |                      | Monomer               | 269.5                                               | 227.6 | 175.8 | 55.4                                                            | 46.8  | 36.2  |
| P0AD59          | Ivy          | Periplasm            | Monomer               | 140.5                                               | 118.7 | 91.7  | 15.2                                                            | 12.8  | 9.9   |

| UniProtKB A. N. | Protein name | Subcellular location | Subunit               | $D_0 \left( \frac{\mu\text{m}^2}{\text{s}} \right)$ |       |       | $D_{\text{cyto}} \left( \frac{\mu\text{m}^2}{\text{s}} \right)$ |       |       |
|-----------------|--------------|----------------------|-----------------------|-----------------------------------------------------|-------|-------|-----------------------------------------------------------------|-------|-------|
|                 |              |                      |                       | 310 K                                               | 303 K | 293 K | 310 K                                                           | 303 K | 293 K |
|                 |              |                      | Complex with SecB     | 74.2                                                | 60.6  | 48.4  | 3.3                                                             | 2.7   | 2.2   |
|                 |              |                      | Complex with TF (Tig) | 82.8                                                | 69.9  | 54.0  | 4.4                                                             | 3.7   | 2.9   |
| P21179          | KatE         | Cytoplasm            | Monomer               | 74.8                                                | 63.2  | 48.8  | 3.4                                                             | 2.9   | 2.2   |
|                 |              |                      | Homotetramer          | 43.5                                                | 35.5  | 28.4  | 0.7                                                             | 0.6   | 0.5   |
| P13029          | KatG         |                      | Monomer               | 76.3                                                | 64.5  | 49.8  | 3.6                                                             | 3.0   | 2.3   |
|                 |              |                      | Homotetramer          | 44.3                                                | 36.2  | 28.9  | 0.8                                                             | 0.6   | 0.5   |
| P0AB74          | KbaY         |                      | Monomer               | 110.3                                               | 93.2  | 72.0  | 8.8                                                             | 7.5   | 5.8   |
|                 |              |                      | Homotetramer          | 64.1                                                | 52.3  | 41.8  | 2.2                                                             | 1.8   | 1.5   |
| P0C8K0          | KbaZ         |                      | Monomer               | 93.9                                                | 79.3  | 61.3  | 6.0                                                             | 5.1   | 3.9   |
| P0AB77          | Kbl          |                      | Monomer               | 97.3                                                | 82.2  | 63.5  | 6.6                                                             | 5.5   | 4.3   |
|                 |              |                      | Homodimer             | 74.1                                                | 60.6  | 48.4  | 3.3                                                             | 2.7   | 2.2   |
| P31069          | Kch          | Cell inner membrane  | Monomer               | 94.8                                                | 80.1  | 61.9  | 6.2                                                             | 5.2   | 4.0   |
|                 |              |                      | Complex with SecB     | 66.2                                                | 54.1  | 43.2  | 2.5                                                             | 2.0   | 1.6   |
|                 |              |                      | Complex with TF (Tig) | 71.6                                                | 60.5  | 46.7  | 3.0                                                             | 2.6   | 2.0   |
| P37647          | KdgK         |                      | Monomer               | 106.8                                               | 90.2  | 69.7  | 8.2                                                             | 6.9   | 5.3   |
| P76268          | KdgR         |                      | Monomer               | 112.1                                               | 94.7  | 73.2  | 9.2                                                             | 7.7   | 6.0   |
| P0A712          | KdgT         | Cell inner membrane  | Monomer               | 107.2                                               | 90.6  | 69.9  | 8.3                                                             | 7.0   | 5.4   |
|                 |              |                      | Complex with SecB     | 69.2                                                | 56.5  | 45.2  | 2.8                                                             | 2.3   | 1.8   |
|                 |              |                      | Complex with TF (Tig) | 75.7                                                | 63.9  | 49.4  | 3.5                                                             | 3.0   | 2.3   |
| P03959          | KdpA         | Cell inner membrane  | Monomer               | 85.9                                                | 72.6  | 56.1  | 4.8                                                             | 4.1   | 3.2   |
|                 |              |                      | Complex with SecB     | 63.4                                                | 51.8  | 41.4  | 2.2                                                             | 1.8   | 1.4   |
|                 |              |                      | Complex with TF (Tig) | 68.0                                                | 57.5  | 44.4  | 2.6                                                             | 2.2   | 1.7   |
| P03960          | KdpB         | Cell inner membrane  | Monomer               | 79.5                                                | 67.2  | 51.9  | 4.0                                                             | 3.4   | 2.6   |
|                 |              |                      | Complex with SecB     | 61.1                                                | 49.9  | 39.9  | 2.0                                                             | 1.6   | 1.3   |
|                 |              |                      | Complex with TF (Tig) | 65.0                                                | 55.0  | 42.4  | 2.3                                                             | 2.0   | 1.5   |
| P03961          | KdpC         | Cell inner membrane  | Monomer               | 130.8                                               | 110.5 | 85.3  | 13.0                                                            | 11.0  | 8.5   |
|                 |              |                      | Complex with SecB     | 73.1                                                | 59.7  | 47.7  | 3.2                                                             | 2.6   | 2.1   |
|                 |              |                      | Complex with TF (Tig) | 81.2                                                | 68.6  | 53.0  | 4.2                                                             | 3.5   | 2.7   |
| P21865          | KdpD         | Cell inner membrane  | Monomer               | 70.3                                                | 59.4  | 45.9  | 2.9                                                             | 2.4   | 1.9   |
|                 |              |                      | Complex with SecB     | 57.1                                                | 46.7  | 37.3  | 1.6                                                             | 1.3   | 1.1   |
|                 |              |                      | Complex with TF (Tig) | 60.2                                                | 50.8  | 39.3  | 1.9                                                             | 1.6   | 1.2   |

| UniProtKB A. N. | Protein name | Subcellular location | Subunit               | $D_0 \left( \frac{\mu\text{m}^2}{\text{s}} \right)$ |       |       | $D_{\text{cyto}} \left( \frac{\mu\text{m}^2}{\text{s}} \right)$ |       |       |
|-----------------|--------------|----------------------|-----------------------|-----------------------------------------------------|-------|-------|-----------------------------------------------------------------|-------|-------|
|                 |              |                      |                       | 310 K                                               | 303 K | 293 K | 310 K                                                           | 303 K | 293 K |
| P21866          | KdpE         | Cytoplasm            | Monomer               | 119.8                                               | 101.2 | 78.2  | 10.7                                                            | 9.0   | 7.0   |
| P36937          | KdpF         | Cell inner membrane  | Monomer               | 274.0                                               | 231.5 | 178.8 | 57.1                                                            | 48.3  | 37.3  |
|                 |              |                      | Complex with SecB     | 79.5                                                | 64.9  | 51.9  | 4.0                                                             | 3.2   | 2.6   |
|                 |              |                      | Complex with TF (Tig) | 90.9                                                | 76.8  | 59.3  | 5.6                                                             | 4.7   | 3.6   |
| P0A715          | KdsA         | Cytoplasm            | Monomer               | 111.0                                               | 93.7  | 72.4  | 8.9                                                             | 7.6   | 5.8   |
|                 |              |                      | Homotrimer            | 72.1                                                | 58.9  | 47.1  | 3.1                                                             | 2.5   | 2.0   |
| P04951          | KdsB         | Cytoplasm            | Monomer               | 115.9                                               | 97.9  | 75.6  | 9.9                                                             | 8.4   | 6.4   |
| P0ABZ4          | KdsC         |                      | Monomer               | 131.5                                               | 111.1 | 85.8  | 13.1                                                            | 11.1  | 8.6   |
|                 |              |                      | Homotetramer          | 76.4                                                | 62.4  | 49.8  | 3.6                                                             | 2.9   | 2.3   |
| P45395          | KdsD         |                      | Monomer               | 105.3                                               | 89.0  | 68.7  | 7.9                                                             | 6.7   | 5.2   |
|                 |              |                      | Homotetramer          | 61.2                                                | 50.0  | 39.9  | 2.0                                                             | 1.6   | 1.3   |
| P37769          | KduD         |                      | Monomer               | 116.8                                               | 98.6  | 76.2  | 10.1                                                            | 8.5   | 6.6   |
| Q46938          | KduI         |                      | Monomer               | 110.6                                               | 93.4  | 72.2  | 8.9                                                             | 7.5   | 5.8   |
|                 |              |                      | Homoheptamer          | 54.8                                                | 44.8  | 35.8  | 1.5                                                             | 1.2   | 0.9   |
| P77338          | KefA         | Cell inner membrane  | Monomer               | 63.7                                                | 53.8  | 41.5  | 2.2                                                             | 1.9   | 1.4   |
|                 |              |                      | Complex with SecB     | 53.7                                                | 43.9  | 35.0  | 1.4                                                             | 1.1   | 0.9   |
|                 |              |                      | Complex with TF (Tig) | 56.1                                                | 47.4  | 36.6  | 1.6                                                             | 1.3   | 1.0   |
| P45522          | KefB         | Cell inner membrane  | Monomer               | 82.1                                                | 69.4  | 53.6  | 4.3                                                             | 3.6   | 2.8   |
|                 |              |                      | Complex with SecB     | 62.1                                                | 50.7  | 40.5  | 2.1                                                             | 1.7   | 1.3   |
|                 |              |                      | Complex with TF (Tig) | 66.3                                                | 56.0  | 43.3  | 2.5                                                             | 2.1   | 1.6   |
| P03819          | KefC         | Cell inner membrane  | Monomer               | 81.5                                                | 68.8  | 53.2  | 4.2                                                             | 3.6   | 2.8   |
|                 |              |                      | Complex with SecB     | 61.9                                                | 50.5  | 40.4  | 2.0                                                             | 1.7   | 1.3   |
|                 |              |                      | Complex with TF (Tig) | 66.0                                                | 55.8  | 43.1  | 2.4                                                             | 2.1   | 1.6   |
| P0A754          | KefF         |                      | Monomer               | 131.0                                               | 110.7 | 85.5  | 13.0                                                            | 11.0  | 8.5   |
| P0A756          | KefG         |                      | Monomer               | 129.1                                               | 109.1 | 84.2  | 12.6                                                            | 10.7  | 8.2   |
| P0AEX3          | KgtP         | Cell inner membrane  | Monomer               | 94.0                                                | 79.4  | 61.3  | 6.0                                                             | 5.1   | 3.9   |
|                 |              |                      | Complex with SecB     | 66.0                                                | 53.9  | 43.0  | 2.4                                                             | 2.0   | 1.6   |
|                 |              |                      | Complex with TF (Tig) | 71.3                                                | 60.2  | 46.5  | 3.0                                                             | 2.5   | 2.0   |
| P38393          | Kil          |                      | Monomer               | 184.4                                               | 155.8 | 120.3 | 26.8                                                            | 22.6  | 17.5  |
| P39380          | KptA         |                      | Monomer               | 130.1                                               | 109.9 | 84.9  | 12.8                                                            | 10.8  | 8.4   |
| P63183          | Kup          | Cell inner membrane  | Monomer               | 80.8                                                | 68.2  | 52.7  | 4.1                                                             | 3.5   | 2.7   |



| UniProtKB A. N. | Protein name | Subcellular location | Subunit               | $D_0 \left( \frac{\mu\text{m}^2}{\text{s}} \right)$ |       |       | $D_{\text{cyto}} \left( \frac{\mu\text{m}^2}{\text{s}} \right)$ |       |       |
|-----------------|--------------|----------------------|-----------------------|-----------------------------------------------------|-------|-------|-----------------------------------------------------------------|-------|-------|
|                 |              |                      |                       | 310 K                                               | 303 K | 293 K | 310 K                                                           | 303 K | 293 K |
|                 |              |                      | Complex with SecB     | 61.6                                                | 50.3  | 40.2  | 2.0                                                             | 1.6   | 1.3   |
|                 |              |                      | Complex with TF (Tig) | 65.7                                                | 55.5  | 42.9  | 2.4                                                             | 2.0   | 1.6   |
| P07464          | LacA         | Cytoplasm            | Monomer               | 124.9                                               | 105.5 | 81.5  | 11.7                                                            | 9.9   | 7.6   |
|                 |              |                      | Homodimer             | 95.2                                                | 77.8  | 62.1  | 6.2                                                             | 5.1   | 4.1   |
| P03023          | LacI         |                      | Monomer               | 101.6                                               | 85.8  | 66.3  | 7.3                                                             | 6.2   | 4.8   |
|                 |              |                      | Homotetramer          | 59.0                                                | 48.2  | 38.5  | 1.8                                                             | 1.5   | 1.2   |
| P02920          | LacY         | Cell inner membrane  | Monomer               | 94.4                                                | 79.8  | 61.6  | 6.1                                                             | 5.2   | 4.0   |
|                 |              |                      | Complex with SecB     | 66.1                                                | 54.0  | 43.1  | 2.4                                                             | 2.0   | 1.6   |
|                 |              |                      | Complex with TF (Tig) | 71.5                                                | 60.4  | 46.6  | 3.0                                                             | 2.5   | 2.0   |
| P00722          | LacZ         |                      | Monomer               | 65.9                                                | 55.7  | 43.0  | 2.4                                                             | 2.0   | 1.6   |
|                 |              |                      | Homotetramer          | 38.3                                                | 31.3  | 25.0  | 0.5                                                             | 0.4   | 0.3   |
| P02943          | LamB         | Cell outer membrane  | Monomer               | 91.9                                                | 77.6  | 59.9  | 5.7                                                             | 4.8   | 3.7   |
|                 |              |                      | Complex with SecB     | 65.3                                                | 53.4  | 42.6  | 2.4                                                             | 1.9   | 1.5   |
|                 |              |                      | Complex with TF (Tig) | 70.5                                                | 59.5  | 46.0  | 2.9                                                             | 2.5   | 1.9   |
| P33229          | Lar          |                      | Monomer               | 198.2                                               | 167.4 | 129.3 | 30.9                                                            | 26.1  | 20.2  |
| P37005          | LasT         |                      | Monomer               | 120.0                                               | 101.4 | 78.3  | 10.7                                                            | 9.0   | 7.0   |
| P76008          | LdcA         | Cytoplasm            | Monomer               | 107.3                                               | 90.7  | 70.0  | 8.3                                                             | 7.0   | 5.4   |
| P52095          | LdcC         |                      | Monomer               | 76.1                                                | 64.3  | 49.7  | 3.6                                                             | 3.0   | 2.3   |
|                 |              |                      | Homodecamer           | 30.9                                                | 25.2  | 20.1  | 0.2                                                             | 0.2   | 0.2   |
| P52643          | LdhA         |                      | Monomer               | 103.8                                               | 87.7  | 67.7  | 7.7                                                             | 6.5   | 5.0   |
| Q6BF86          | LdrA; ldrC   |                      | Monomer               | 246.7                                               | 208.4 | 161.0 | 47.1                                                            | 39.8  | 30.7  |
| Q6BF87          | LdrB         |                      | Monomer               | 247.8                                               | 209.3 | 161.7 | 47.4                                                            | 40.1  | 31.0  |
| Q6BF25          | LdrD         |                      | Monomer               | 249.1                                               | 210.5 | 162.6 | 47.9                                                            | 40.5  | 31.3  |
| P60785          | LepA         | Cell inner membrane  | Monomer               | 82.1                                                | 69.3  | 53.5  | 4.3                                                             | 3.6   | 2.8   |
| P00803          | LepB         | Cell inner membrane  | Monomer               | 104.5                                               | 88.2  | 68.2  | 7.8                                                             | 6.6   | 5.1   |
|                 |              |                      | Complex with SecB     | 68.6                                                | 56.1  | 44.8  | 2.7                                                             | 2.2   | 1.8   |
|                 |              |                      | Complex with TF (Tig) | 74.9                                                | 63.2  | 48.8  | 3.4                                                             | 2.9   | 2.2   |
| P09151          | LeuA         |                      | Monomer               | 87.0                                                | 73.5  | 56.8  | 5.0                                                             | 4.2   | 3.3   |
|                 |              |                      | Homotetramer          | 50.5                                                | 41.3  | 33.0  | 1.1                                                             | 0.9   | 0.7   |
| P30125          | LeuB         | Cytoplasm            | Monomer               | 100.7                                               | 85.0  | 65.7  | 7.1                                                             | 6.0   | 4.6   |
|                 |              |                      | Homodimer             | 76.7                                                | 62.7  | 50.1  | 3.6                                                             | 3.0   | 2.4   |

| UniProtKB A. N. | Protein name | Subcellular location | Subunit                 | $D_0 \left( \frac{\mu\text{m}^2}{\text{s}} \right)$ |       |       | $D_{\text{cyto}} \left( \frac{\mu\text{m}^2}{\text{s}} \right)$ |       |       |
|-----------------|--------------|----------------------|-------------------------|-----------------------------------------------------|-------|-------|-----------------------------------------------------------------|-------|-------|
|                 |              |                      |                         | 310 K                                               | 303 K | 293 K | 310 K                                                           | 303 K | 293 K |
| P0A6A6          | LeuC         |                      | Monomer                 | 91.9                                                | 77.6  | 60.0  | 5.7                                                             | 4.8   | 3.7   |
|                 |              |                      | Heterodimer (LeuC–LeuD) | 79.4                                                | 67.1  | 51.8  | 4.0                                                             | 3.3   | 2.6   |
| P30126          | LeuD         |                      | Monomer                 | 125.6                                               | 106.1 | 81.9  | 11.9                                                            | 10.0  | 7.7   |
|                 |              |                      | Heterodimer (LeuC–LeuD) | 79.4                                                | 67.1  | 51.8  | 4.0                                                             | 3.3   | 2.6   |
| P76249          | LeuE         | Cell membrane        | Monomer                 | 124.0                                               | 104.8 | 80.9  | 11.5                                                            | 9.7   | 7.5   |
|                 |              |                      | Complex with SecB       | 72.2                                                | 59.0  | 47.1  | 3.1                                                             | 2.5   | 2.0   |
|                 |              |                      | Complex with TF (Tig)   | 79.8                                                | 67.4  | 52.1  | 4.0                                                             | 3.4   | 2.6   |
| P0AD79          | LeuL         |                      | Monomer                 | 271.5                                               | 229.3 | 177.1 | 56.2                                                            | 47.4  | 36.6  |
| P10151          | LeuO         |                      | Monomer                 | 104.8                                               | 88.5  | 68.4  | 7.8                                                             | 6.6   | 5.1   |
| P07813          | LeuS         | Cytoplasm            | Monomer                 | 70.7                                                | 59.8  | 46.2  | 2.9                                                             | 2.5   | 1.9   |
| P0A7C2          | LexA         |                      | Monomer                 | 125.9                                               | 106.3 | 82.1  | 11.9                                                            | 10.1  | 7.8   |
|                 |              |                      | Homodimer               | 95.9                                                | 78.3  | 62.6  | 6.3                                                             | 5.2   | 4.1   |
| P60955          | Lgt          | Cell inner membrane  | Monomer                 | 107.9                                               | 91.2  | 70.4  | 8.4                                                             | 7.1   | 5.5   |
|                 |              |                      | Complex with SecB       | 69.4                                                | 56.7  | 45.3  | 2.8                                                             | 2.3   | 1.8   |
|                 |              |                      | Complex with TF (Tig)   | 75.9                                                | 64.1  | 49.5  | 3.5                                                             | 3.0   | 2.3   |
| P37339          | LhgO         |                      | Monomer                 | 94.8                                                | 80.1  | 61.9  | 6.2                                                             | 5.2   | 4.0   |
| P30015          | Lhr          |                      | Monomer                 | 56.9                                                | 48.1  | 37.1  | 1.6                                                             | 1.4   | 1.1   |
| P15042          | LigA         |                      | Monomer                 | 78.9                                                | 66.6  | 51.5  | 3.9                                                             | 3.3   | 2.5   |
| P25772          | LigB         |                      | Monomer                 | 83.8                                                | 70.8  | 54.7  | 4.5                                                             | 3.8   | 3.0   |
| P37025          | LigT         |                      | Monomer                 | 131.6                                               | 111.2 | 85.9  | 13.2                                                            | 11.1  | 8.6   |
| P60716          | LipA         | Cytoplasm            | Monomer                 | 104.3                                               | 88.1  | 68.1  | 7.8                                                             | 6.5   | 5.1   |
|                 |              |                      | Homodimer               | 79.5                                                | 65.0  | 51.9  | 4.0                                                             | 3.2   | 2.6   |
| P60720          | LipB         | Cytoplasm            | Monomer                 | 122.6                                               | 103.6 | 80.0  | 11.2                                                            | 9.5   | 7.3   |
|                 |              |                      | Homotrimer              | 79.7                                                | 65.1  | 52.0  | 4.0                                                             | 3.3   | 2.6   |
| P11072          | Lit          | Cell membrane        | Monomer                 | 107.1                                               | 90.5  | 69.9  | 8.2                                                             | 7.0   | 5.4   |
|                 |              |                      | Complex with SecB       | 69.2                                                | 56.5  | 45.1  | 2.8                                                             | 2.3   | 1.8   |
|                 |              |                      | Complex with TF (Tig)   | 75.6                                                | 63.9  | 49.4  | 3.5                                                             | 3.0   | 2.3   |
| P22731          | LivF         |                      | Monomer                 | 118.1                                               | 99.7  | 77.0  | 10.3                                                            | 8.7   | 6.7   |
| P0A9S7          | LivG         |                      | Monomer                 | 114.5                                               | 96.8  | 74.7  | 9.6                                                             | 8.1   | 6.3   |
| P0AEX7          | LivH         | Cell inner membrane  | Monomer                 | 108.1                                               | 91.3  | 70.5  | 8.4                                                             | 7.1   | 5.5   |
|                 |              |                      | Complex with SecB       | 69.4                                                | 56.7  | 45.3  | 2.8                                                             | 2.3   | 1.8   |

| UniProtKB A. N. | Protein name | Subcellular location | Subunit               | $D_0 \left( \frac{\mu\text{m}^2}{\text{s}} \right)$ |       |       | $D_{\text{cyto}} \left( \frac{\mu\text{m}^2}{\text{s}} \right)$ |       |       |
|-----------------|--------------|----------------------|-----------------------|-----------------------------------------------------|-------|-------|-----------------------------------------------------------------|-------|-------|
|                 |              |                      |                       | 310 K                                               | 303 K | 293 K | 310 K                                                           | 303 K | 293 K |
|                 |              |                      | Complex with TF (Tig) | 75.9                                                | 64.1  | 49.5  | 3.5                                                             | 3.0   | 2.3   |
| P0AD96          | LivJ         | Periplasm            | Monomer               | 101.1                                               | 85.4  | 66.0  | 7.2                                                             | 6.1   | 4.7   |
|                 |              |                      | Complex with SecB     | 67.8                                                | 55.4  | 44.3  | 2.6                                                             | 2.1   | 1.7   |
|                 |              |                      | Complex with TF (Tig) | 73.8                                                | 62.3  | 48.2  | 3.3                                                             | 2.8   | 2.1   |
| P04816          | LivK         | Periplasm            | Monomer               | 100.8                                               | 85.2  | 65.8  | 7.1                                                             | 6.0   | 4.7   |
|                 |              |                      | Complex with SecB     | 67.8                                                | 55.4  | 44.2  | 2.6                                                             | 2.1   | 1.7   |
|                 |              |                      | Complex with TF (Tig) | 73.7                                                | 62.3  | 48.1  | 3.3                                                             | 2.8   | 2.1   |
| P22729          | LivM         | Cell inner membrane  | Monomer               | 94.6                                                | 79.9  | 61.8  | 6.1                                                             | 5.2   | 4.0   |
|                 |              |                      | Complex with SecB     | 66.1                                                | 54.0  | 43.2  | 2.5                                                             | 2.0   | 1.6   |
|                 |              |                      | Complex with TF (Tig) | 71.5                                                | 60.4  | 46.7  | 3.0                                                             | 2.6   | 2.0   |
| P33232          | LldD         |                      | Monomer               | 97.6                                                | 82.5  | 63.7  | 6.6                                                             | 5.6   | 4.3   |
| P33231          | LldP         | Cell inner membrane  | Monomer               | 85.9                                                | 72.6  | 56.1  | 4.8                                                             | 4.1   | 3.2   |
|                 |              |                      | Complex with SecB     | 63.5                                                | 51.8  | 41.4  | 2.2                                                             | 1.8   | 1.4   |
|                 |              |                      | Complex with TF (Tig) | 68.0                                                | 57.5  | 44.4  | 2.6                                                             | 2.2   | 1.7   |
| P0ACL7          | LldR         |                      | Monomer               | 113.4                                               | 95.8  | 74.0  | 9.4                                                             | 7.9   | 6.1   |
| P23930          | Lnt          | Cell inner membrane  | Monomer               | 87.2                                                | 73.6  | 56.9  | 5.0                                                             | 4.2   | 3.3   |
|                 |              |                      | Complex with SecB     | 63.9                                                | 52.2  | 41.7  | 2.2                                                             | 1.8   | 1.5   |
|                 |              |                      | Complex with TF (Tig) | 68.6                                                | 57.9  | 44.7  | 2.7                                                             | 2.3   | 1.8   |
| P61316          | LolA         | Periplasm            | Monomer               | 125.5                                               | 106.1 | 81.9  | 11.9                                                            | 10.0  | 7.7   |
|                 |              |                      | Complex with SecB     | 72.4                                                | 59.1  | 47.2  | 3.1                                                             | 2.5   | 2.0   |
|                 |              |                      | Complex with TF (Tig) | 80.1                                                | 67.7  | 52.3  | 4.1                                                             | 3.4   | 2.6   |
| P61320          | LolB         | Cell outer membrane  | Monomer               | 123.3                                               | 104.2 | 80.5  | 11.4                                                            | 9.6   | 7.4   |
|                 |              |                      | Complex with SecB     | 72.1                                                | 58.9  | 47.0  | 3.1                                                             | 2.5   | 2.0   |
|                 |              |                      | Complex with TF (Tig) | 79.7                                                | 67.3  | 52.0  | 4.0                                                             | 3.4   | 2.6   |
| P0ADC3          | LolC         | Cell inner membrane  | Monomer               | 97.2                                                | 82.1  | 63.4  | 6.5                                                             | 5.5   | 4.3   |
|                 |              |                      | Complex with SecB     | 66.8                                                | 54.6  | 43.6  | 2.5                                                             | 2.1   | 1.6   |
|                 |              |                      | Complex with TF (Tig) | 72.4                                                | 61.2  | 47.3  | 3.1                                                             | 2.6   | 2.0   |
| P75957          | LolD         | Cell inner membrane  | Monomer               | 119.6                                               | 101.1 | 78.1  | 10.6                                                            | 9.0   | 6.9   |
|                 |              |                      | Complex with SecB     | 71.5                                                | 58.4  | 46.7  | 3.0                                                             | 2.5   | 2.0   |
|                 |              |                      | Complex with TF (Tig) | 78.9                                                | 66.6  | 51.5  | 3.9                                                             | 3.3   | 2.5   |
| P75958          | LolE         | Cell inner membrane  | Monomer               | 95.4                                                | 80.6  | 62.2  | 6.3                                                             | 5.3   | 4.1   |

| UniProtKB A. N. | Protein name | Subcellular location           | Subunit               | $D_0 \left( \frac{\mu\text{m}^2}{\text{s}} \right)$ |       |       | $D_{\text{cyto}} \left( \frac{\mu\text{m}^2}{\text{s}} \right)$ |       |       |
|-----------------|--------------|--------------------------------|-----------------------|-----------------------------------------------------|-------|-------|-----------------------------------------------------------------|-------|-------|
|                 |              |                                |                       | 310 K                                               | 303 K | 293 K | 310 K                                                           | 303 K | 293 K |
|                 |              |                                | Complex with SecB     | 66.4                                                | 54.2  | 43.3  | 2.5                                                             | 2.0   | 1.6   |
|                 |              |                                | Complex with TF (Tig) | 71.8                                                | 60.7  | 46.9  | 3.1                                                             | 2.6   | 2.0   |
| P77184          | LomR         |                                | Monomer               | 137.8                                               | 116.4 | 89.9  | 14.6                                                            | 12.3  | 9.5   |
| P0A9M0          | Lon          | Cytoplasm                      | Monomer               | 73.7                                                | 62.3  | 48.1  | 3.3                                                             | 2.8   | 2.1   |
|                 |              |                                | Homohexamer           | 36.5                                                | 29.8  | 23.8  | 0.4                                                             | 0.3   | 0.3   |
| P0A9P0          | LpdA         | Cytoplasm. Cell inner membrane | Monomer               | 91.3                                                | 77.1  | 59.6  | 5.6                                                             | 4.8   | 3.7   |
|                 |              |                                | Homodimer             | 69.6                                                | 56.8  | 45.4  | 2.8                                                             | 2.3   | 1.8   |
| P32099          | LplA         | Cytoplasm                      | Monomer               | 102.3                                               | 86.4  | 66.8  | 7.4                                                             | 6.3   | 4.8   |
| P39196          | LplT         | Cell inner membrane            | Monomer               | 98.6                                                | 83.3  | 64.3  | 6.8                                                             | 5.7   | 4.4   |
|                 |              |                                | Complex with SecB     | 67.2                                                | 54.9  | 43.9  | 2.6                                                             | 2.1   | 1.7   |
|                 |              |                                | Complex with TF (Tig) | 73.0                                                | 61.6  | 47.6  | 3.2                                                             | 2.7   | 2.1   |
| P45464          | LpoA         | Cell outer membrane            | Monomer               | 79.2                                                | 66.9  | 51.7  | 3.9                                                             | 3.3   | 2.6   |
|                 |              |                                | Complex with SecB     | 61.0                                                | 49.8  | 39.8  | 2.0                                                             | 1.6   | 1.3   |
|                 |              |                                | Complex with TF (Tig) | 64.9                                                | 54.8  | 42.4  | 2.3                                                             | 2.0   | 1.5   |
| P0AB38          | LpoB         | Cell outer membrane            | Monomer               | 125.5                                               | 106.0 | 81.9  | 11.8                                                            | 10.0  | 7.7   |
|                 |              |                                | Complex with SecB     | 72.4                                                | 59.1  | 47.2  | 3.1                                                             | 2.5   | 2.0   |
|                 |              |                                | Complex with TF (Tig) | 80.1                                                | 67.7  | 52.3  | 4.1                                                             | 3.4   | 2.6   |
| P69776          | Lpp          | Cell outer membrane            | Monomer               | 185.4                                               | 156.6 | 121.0 | 27.1                                                            | 22.9  | 17.7  |
|                 |              |                                | Complex with SecB     | 77.3                                                | 63.2  | 50.5  | 3.7                                                             | 3.0   | 2.4   |
|                 |              |                                | Complex with TF (Tig) | 87.5                                                | 73.9  | 57.1  | 5.1                                                             | 4.3   | 3.3   |
| P0ADV1          | LptA         | Periplasm                      | Monomer               | 131.1                                               | 110.8 | 85.6  | 13.1                                                            | 11.0  | 8.5   |
|                 |              |                                | Complex with SecB     | 73.2                                                | 59.8  | 47.7  | 3.2                                                             | 2.6   | 2.1   |
|                 |              |                                | Complex with TF (Tig) | 81.2                                                | 68.6  | 53.0  | 4.2                                                             | 3.5   | 2.7   |
| P0A9V1          | LptB         | Cytoplasm. Cell inner membrane | Monomer               | 117.2                                               | 99.0  | 76.5  | 10.2                                                            | 8.6   | 6.6   |
| P0ADV9          | LptC         | Cell inner membrane            | Monomer               | 127.3                                               | 107.6 | 83.1  | 12.2                                                            | 10.3  | 8.0   |
|                 |              |                                | Complex with SecB     | 72.7                                                | 59.4  | 47.4  | 3.1                                                             | 2.6   | 2.1   |
|                 |              |                                | Complex with TF (Tig) | 80.5                                                | 68.0  | 52.5  | 4.1                                                             | 3.5   | 2.7   |
| P31554          | LptD         | Cell outer membrane            | Monomer               | 73.0                                                | 61.7  | 47.6  | 3.2                                                             | 2.7   | 2.1   |
|                 |              |                                | Complex with SecB     | 58.4                                                | 47.7  | 38.1  | 1.7                                                             | 1.4   | 1.1   |
|                 |              |                                | Complex with TF (Tig) | 61.7                                                | 52.1  | 40.3  | 2.0                                                             | 1.7   | 1.3   |

| UniProtKB A. N. | Protein name | Subcellular location | Subunit               | $D_0 \left( \frac{\mu\text{m}^2}{\text{s}} \right)$ |       |       | $D_{\text{cyto}} \left( \frac{\mu\text{m}^2}{\text{s}} \right)$ |       |       |
|-----------------|--------------|----------------------|-----------------------|-----------------------------------------------------|-------|-------|-----------------------------------------------------------------|-------|-------|
|                 |              |                      |                       | 310 K                                               | 303 K | 293 K | 310 K                                                           | 303 K | 293 K |
| P0ADC1          | LptE         | Cell outer membrane  | Monomer               | 128.1                                               | 108.2 | 83.6  | 12.4                                                            | 10.5  | 8.1   |
|                 |              |                      | Complex with SecB     | 72.8                                                | 59.4  | 47.5  | 3.2                                                             | 2.6   | 2.1   |
|                 |              |                      | Complex with TF (Tig) | 80.7                                                | 68.1  | 52.6  | 4.1                                                             | 3.5   | 2.7   |
| P0AF98          | LptF         | Cell inner membrane  | Monomer               | 99.8                                                | 84.3  | 65.2  | 7.0                                                             | 5.9   | 4.6   |
|                 |              |                      | Complex with SecB     | 67.5                                                | 55.2  | 44.1  | 2.6                                                             | 2.1   | 1.7   |
|                 |              |                      | Complex with TF (Tig) | 73.4                                                | 62.0  | 47.9  | 3.2                                                             | 2.7   | 2.1   |
| P0ADC6          | LptG         | Cell inner membrane  | Monomer               | 100.6                                               | 85.0  | 65.6  | 7.1                                                             | 6.0   | 4.6   |
|                 |              |                      | Complex with SecB     | 67.7                                                | 55.3  | 44.2  | 2.6                                                             | 2.1   | 1.7   |
|                 |              |                      | Complex with TF (Tig) | 73.6                                                | 62.2  | 48.0  | 3.3                                                             | 2.8   | 2.1   |
| P0A722          | LpxA         | Cytoplasm            | Monomer               | 115.1                                               | 97.2  | 75.1  | 9.7                                                             | 8.2   | 6.4   |
|                 |              |                      | Homotrimer            | 74.8                                                | 61.1  | 48.8  | 3.4                                                             | 2.8   | 2.2   |
| P10441          | LpxB         |                      | Monomer               | 97.9                                                | 82.7  | 63.9  | 6.7                                                             | 5.6   | 4.4   |
| P0A725          | LpxC         |                      | Monomer               | 106.8                                               | 90.3  | 69.7  | 8.2                                                             | 6.9   | 5.3   |
| P21645          | LpxD         |                      | Monomer               | 104.4                                               | 88.2  | 68.1  | 7.8                                                             | 6.6   | 5.1   |
| P43341          | LpxH         | Cytoplasm            | Monomer               | 117.1                                               | 98.9  | 76.4  | 10.1                                                            | 8.5   | 6.6   |
| P27300          | LpxK         |                      | Monomer               | 104.9                                               | 88.6  | 68.4  | 7.8                                                             | 6.6   | 5.1   |
| P0ACV2          | LpxP         | Cell inner membrane  | Monomer               | 105.0                                               | 88.7  | 68.5  | 7.9                                                             | 6.6   | 5.1   |
|                 |              |                      | Complex with SecB     | 68.7                                                | 56.2  | 44.9  | 2.7                                                             | 2.2   | 1.8   |
|                 |              |                      | Complex with TF (Tig) | 75.0                                                | 63.4  | 49.0  | 3.4                                                             | 2.9   | 2.2   |
| P36771          | LrhA         |                      | Monomer               | 106.1                                               | 89.6  | 69.2  | 8.1                                                             | 6.8   | 5.3   |
| P0ACJ0          | Lrp          |                      | Monomer               | 134.5                                               | 113.6 | 87.7  | 13.8                                                            | 11.7  | 9.0   |
|                 |              |                      | Homodimer             | 102.5                                               | 83.7  | 66.9  | 7.4                                                             | 6.1   | 4.8   |
| P00804          | LspA         | Cell inner membrane  | Monomer               | 136.6                                               | 115.4 | 89.1  | 14.3                                                            | 12.1  | 9.3   |
|                 |              |                      | Complex with SecB     | 73.8                                                | 60.3  | 48.2  | 3.3                                                             | 2.7   | 2.1   |
|                 |              |                      | Complex with TF (Tig) | 82.2                                                | 69.4  | 53.6  | 4.3                                                             | 3.7   | 2.8   |
| P77257          | LsrA         | Cell inner membrane  | Monomer               | 87.9                                                | 74.3  | 57.4  | 5.1                                                             | 4.3   | 3.3   |
|                 |              |                      | Complex with SecB     | 64.1                                                | 52.4  | 41.8  | 2.3                                                             | 1.8   | 1.5   |
|                 |              |                      | Complex with TF (Tig) | 68.9                                                | 58.2  | 45.0  | 2.7                                                             | 2.3   | 1.8   |
| P76142          | LsrB         | Periplasm            | Monomer               | 103.6                                               | 87.6  | 67.6  | 7.6                                                             | 6.4   | 5.0   |
|                 |              |                      | Complex with SecB     | 68.4                                                | 55.9  | 44.7  | 2.7                                                             | 2.2   | 1.8   |
|                 |              |                      | Complex with TF (Tig) | 74.6                                                | 63.0  | 48.7  | 3.4                                                             | 2.9   | 2.2   |

| UniProtKB A. N. | Protein name | Subcellular location | Subunit               | $D_0 \left( \frac{\mu\text{m}^2}{\text{s}} \right)$ |       |       | $D_{\text{cyto}} \left( \frac{\mu\text{m}^2}{\text{s}} \right)$ |       |       |
|-----------------|--------------|----------------------|-----------------------|-----------------------------------------------------|-------|-------|-----------------------------------------------------------------|-------|-------|
|                 |              |                      |                       | 310 K                                               | 303 K | 293 K | 310 K                                                           | 303 K | 293 K |
| P77672          | LsrC         | Cell inner membrane  | Monomer               | 104.0                                               | 87.8  | 67.8  | 7.7                                                             | 6.5   | 5.0   |
|                 |              |                      | Complex with SecB     | 68.5                                                | 56.0  | 44.7  | 2.7                                                             | 2.2   | 1.8   |
|                 |              |                      | Complex with TF (Tig) | 74.7                                                | 63.1  | 48.7  | 3.4                                                             | 2.9   | 2.2   |
| P0AFS1          | LsrD         | Cell inner membrane  | Monomer               | 106.2                                               | 89.7  | 69.3  | 8.1                                                             | 6.8   | 5.3   |
|                 |              |                      | Complex with SecB     | 69.0                                                | 56.4  | 45.0  | 2.7                                                             | 2.2   | 1.8   |
|                 |              |                      | Complex with TF (Tig) | 75.4                                                | 63.7  | 49.2  | 3.5                                                             | 2.9   | 2.3   |
| P76143          | LsrF         | Cytoplasm            | Monomer               | 109.5                                               | 92.5  | 71.4  | 8.7                                                             | 7.3   | 5.7   |
| P64461          | LsrG         | Cytoplasm            | Monomer               | 164.7                                               | 139.1 | 107.5 | 21.3                                                            | 18.0  | 13.9  |
| P77432          | LsrK         | Cytoplasm            | Monomer               | 86.9                                                | 73.4  | 56.7  | 5.0                                                             | 4.2   | 3.2   |
| P76141          | LsrR         | Cytoplasm            | Monomer               | 107.0                                               | 90.4  | 69.8  | 8.2                                                             | 7.0   | 5.4   |
| P75823          | LtaE         |                      | Monomer               | 103.9                                               | 87.7  | 67.8  | 7.7                                                             | 6.5   | 5.0   |
|                 |              |                      | Homotetramer          | 60.3                                                | 49.3  | 39.4  | 1.9                                                             | 1.6   | 1.2   |
| P45578          | LuxS         |                      | Monomer               | 133.0                                               | 112.4 | 86.8  | 13.5                                                            | 11.4  | 8.8   |
|                 |              |                      | Homodimer             | 101.4                                               | 82.8  | 66.1  | 7.2                                                             | 5.9   | 4.7   |
| P00861          | LysA         |                      | Monomer               | 94.7                                                | 80.0  | 61.8  | 6.1                                                             | 5.2   | 4.0   |
| P08660          | LysC         |                      | Monomer               | 92.9                                                | 78.5  | 60.6  | 5.9                                                             | 5.0   | 3.8   |
|                 |              |                      | Homodimer             | 70.8                                                | 57.8  | 46.2  | 2.9                                                             | 2.4   | 1.9   |
|                 |              |                      | Homotetramer          | 53.9                                                | 45.6  | 35.2  | 1.4                                                             | 1.2   | 0.9   |
| P25737          | LysP         | Cell inner membrane  | Monomer               | 89.3                                                | 75.5  | 58.3  | 5.3                                                             | 4.5   | 3.5   |
|                 |              |                      | Complex with SecB     | 64.6                                                | 52.7  | 42.1  | 2.3                                                             | 1.9   | 1.5   |
|                 |              |                      | Complex with TF (Tig) | 69.5                                                | 58.7  | 45.3  | 2.8                                                             | 2.4   | 1.8   |
| P03030          | LysR         | Cytoplasm            | Monomer               | 106.3                                               | 89.8  | 69.4  | 8.1                                                             | 6.8   | 5.3   |
| P0A8N3          | LysS         | Cytoplasm            | Monomer               | 86.8                                                | 73.4  | 56.7  | 5.0                                                             | 4.2   | 3.2   |
|                 |              |                      | Homodimer             | 66.2                                                | 54.1  | 43.2  | 2.5                                                             | 2.0   | 1.6   |
| P0A8N5          | LysU         | Cytoplasm            | Monomer               | 86.7                                                | 73.3  | 56.6  | 5.0                                                             | 4.2   | 3.2   |
|                 |              |                      | Homodimer             | 66.1                                                | 54.0  | 43.1  | 2.4                                                             | 2.0   | 1.6   |
| P37677          | Lyx          |                      | Monomer               | 88.3                                                | 74.6  | 57.6  | 5.2                                                             | 4.4   | 3.4   |
|                 |              |                      | Homodimer             | 67.3                                                | 55.0  | 43.9  | 2.6                                                             | 2.1   | 1.7   |
| P77791          | Maa          |                      | Monomer               | 131.2                                               | 110.9 | 85.6  | 13.1                                                            | 11.0  | 8.5   |
|                 |              |                      | Homodimer             | 100.0                                               | 81.7  | 65.3  | 7.0                                                             | 5.7   | 4.6   |
| P75830          | MacA         | Cell inner membrane  | Monomer               | 99.6                                                | 84.1  | 65.0  | 6.9                                                             | 5.9   | 4.5   |

| UniProtKB A. N. | Protein name | Subcellular location | Subunit               | $D_0 \left( \frac{\mu\text{m}^2}{\text{s}} \right)$ |       |       | $D_{\text{cyto}} \left( \frac{\mu\text{m}^2}{\text{s}} \right)$ |       |       |
|-----------------|--------------|----------------------|-----------------------|-----------------------------------------------------|-------|-------|-----------------------------------------------------------------|-------|-------|
|                 |              |                      |                       | 310 K                                               | 303 K | 293 K | 310 K                                                           | 303 K | 293 K |
|                 |              |                      | Complex with SecB     | 67.5                                                | 55.1  | 44.0  | 2.6                                                             | 2.1   | 1.7   |
|                 |              |                      | Complex with TF (Tig) | 73.3                                                | 61.9  | 47.8  | 3.2                                                             | 2.7   | 2.1   |
| P75831          | MacB         | Cell inner membrane  | Monomer               | 80.1                                                | 67.7  | 52.3  | 4.1                                                             | 3.4   | 2.6   |
|                 |              |                      | Complex with SecB     | 61.3                                                | 50.1  | 40.0  | 2.0                                                             | 1.6   | 1.3   |
|                 |              |                      | Complex with TF (Tig) | 65.4                                                | 55.2  | 42.7  | 2.4                                                             | 2.0   | 1.5   |
| P26616          | MaeA         |                      | Monomer               | 83.7                                                | 70.7  | 54.6  | 4.5                                                             | 3.8   | 3.0   |
|                 |              |                      | Homotetramer          | 48.6                                                | 39.7  | 31.7  | 1.0                                                             | 0.8   | 0.7   |
| P76558          | MaeB         |                      | Monomer               | 75.5                                                | 63.8  | 49.2  | 3.5                                                             | 2.9   | 2.3   |
|                 |              |                      | Homooligomer          | 33.4                                                | 28.2  | 21.8  | 0.3                                                             | 0.3   | 0.2   |
| P23917          | Mak          |                      | Monomer               | 108.7                                               | 91.8  | 70.9  | 8.5                                                             | 7.2   | 5.6   |
| P0AEX9          | MalE         | Periplasm            | Monomer               | 97.0                                                | 82.0  | 63.3  | 6.5                                                             | 5.5   | 4.3   |
|                 |              |                      | Complex with SecB     | 66.8                                                | 54.6  | 43.6  | 2.5                                                             | 2.1   | 1.6   |
|                 |              |                      | Complex with TF (Tig) | 72.4                                                | 61.2  | 47.3  | 3.1                                                             | 2.6   | 2.0   |
| P02916          | MalF         | Cell inner membrane  | Monomer               | 87.2                                                | 73.7  | 56.9  | 5.0                                                             | 4.2   | 3.3   |
|                 |              |                      | Complex with SecB     | 63.9                                                | 52.2  | 41.7  | 2.2                                                             | 1.8   | 1.5   |
|                 |              |                      | Complex with TF (Tig) | 68.6                                                | 57.9  | 44.8  | 2.7                                                             | 2.3   | 1.8   |
| P68183          | MalG         | Cell inner membrane  | Monomer               | 109.0                                               | 92.1  | 71.2  | 8.6                                                             | 7.3   | 5.6   |
|                 |              |                      | Complex with SecB     | 69.6                                                | 56.9  | 45.4  | 2.8                                                             | 2.3   | 1.8   |
|                 |              |                      | Complex with TF (Tig) | 76.2                                                | 64.4  | 49.7  | 3.6                                                             | 3.0   | 2.3   |
| P18811          | MalI         |                      | Monomer               | 103.7                                               | 87.6  | 67.7  | 7.6                                                             | 6.5   | 5.0   |
| P68187          | MalK         | Cell inner membrane  | Monomer               | 99.2                                                | 83.8  | 64.8  | 6.9                                                             | 5.8   | 4.5   |
|                 |              |                      | Complex with SecB     | 67.4                                                | 55.0  | 44.0  | 2.6                                                             | 2.1   | 1.7   |
|                 |              |                      | Complex with TF (Tig) | 73.2                                                | 61.8  | 47.7  | 3.2                                                             | 2.7   | 2.1   |
| P03841          | MalM         | Periplasm            | Monomer               | 109.4                                               | 92.4  | 71.4  | 8.7                                                             | 7.3   | 5.7   |
|                 |              |                      | Complex with SecB     | 69.7                                                | 56.9  | 45.5  | 2.8                                                             | 2.3   | 1.8   |
|                 |              |                      | Complex with TF (Tig) | 76.3                                                | 64.5  | 49.8  | 3.6                                                             | 3.0   | 2.3   |
| P00490          | MalP         |                      | Monomer               | 72.7                                                | 61.5  | 47.5  | 3.2                                                             | 2.7   | 2.1   |
|                 |              |                      | Homodimer             | 55.4                                                | 45.3  | 36.2  | 1.5                                                             | 1.2   | 1.0   |
| P15977          | MalQ         | Cytoplasm            | Monomer               | 76.9                                                | 65.0  | 50.2  | 3.7                                                             | 3.1   | 2.4   |
| P25718          | MalS         | Periplasm            | Monomer               | 78.0                                                | 65.9  | 50.9  | 3.8                                                             | 3.2   | 2.5   |
|                 |              |                      | Complex with SecB     | 60.5                                                | 49.4  | 39.5  | 1.9                                                             | 1.6   | 1.3   |

| UniProtKB A. N. | Protein name | Subcellular location           | Subunit               | $D_0 \left( \frac{\mu\text{m}^2}{\text{s}} \right)$ |       |       | $D_{\text{cyto}} \left( \frac{\mu\text{m}^2}{\text{s}} \right)$ |       |       |
|-----------------|--------------|--------------------------------|-----------------------|-----------------------------------------------------|-------|-------|-----------------------------------------------------------------|-------|-------|
|                 |              |                                |                       | 310 K                                               | 303 K | 293 K | 310 K                                                           | 303 K | 293 K |
|                 |              |                                | Complex with TF (Tig) | 64.3                                                | 54.3  | 42.0  | 2.3                                                             | 1.9   | 1.5   |
| P06993          | MalT         |                                | Monomer               | 69.1                                                | 58.4  | 45.1  | 2.8                                                             | 2.3   | 1.8   |
|                 |              |                                | Monomer               | 87.4                                                | 73.9  | 57.1  | 5.1                                                             | 4.3   | 3.3   |
| P19642          | MalX         | Cell inner membrane            | Complex with SecB     | 64.0                                                | 52.2  | 41.7  | 2.2                                                             | 1.8   | 1.5   |
|                 |              |                                | Complex with TF (Tig) | 68.7                                                | 58.0  | 44.8  | 2.7                                                             | 2.3   | 1.8   |
|                 |              |                                | Monomer               | 96.8                                                | 81.8  | 63.2  | 6.5                                                             | 5.5   | 4.2   |
| P23256          | MalY         |                                | Homodimer             | 73.8                                                | 60.3  | 48.2  | 3.3                                                             | 2.7   | 2.1   |
| P21517          | MalZ         | Cytoplasm                      | Monomer               | 80.8                                                | 68.3  | 52.7  | 4.1                                                             | 3.5   | 2.7   |
| P00946          | ManA         | Cytoplasm                      | Monomer               | 97.5                                                | 82.4  | 63.6  | 6.6                                                             | 5.6   | 4.3   |
| P24175          | ManB         |                                | Monomer               | 91.5                                                | 77.3  | 59.7  | 5.6                                                             | 4.8   | 3.7   |
| P24174          | ManC         |                                | Monomer               | 89.7                                                | 75.8  | 58.5  | 5.4                                                             | 4.6   | 3.5   |
|                 |              | Cytoplasm. Cell inner membrane | Monomer               | 105.5                                               | 89.1  | 68.9  | 8.0                                                             | 6.7   | 5.2   |
|                 |              |                                | Monomer               | 115.8                                               | 97.8  | 75.6  | 9.9                                                             | 8.3   | 6.4   |
| P69801          | ManY         | Cell inner membrane            | Complex with SecB     | 70.9                                                | 57.9  | 46.2  | 2.9                                                             | 2.4   | 1.9   |
|                 |              |                                | Complex with TF (Tig) | 78.0                                                | 65.9  | 50.9  | 3.8                                                             | 3.2   | 2.5   |
|                 |              |                                | Monomer               | 110.3                                               | 93.2  | 72.0  | 8.8                                                             | 7.5   | 5.8   |
| P69805          | ManZ         | Cell inner membrane            | Complex with SecB     | 69.8                                                | 57.1  | 45.6  | 2.8                                                             | 2.3   | 1.9   |
|                 |              |                                | Complex with TF (Tig) | 76.5                                                | 64.7  | 49.9  | 3.6                                                             | 3.0   | 2.4   |
| P77455          | MaoC         |                                | Monomer               | 79.1                                                | 66.9  | 51.6  | 3.9                                                             | 3.3   | 2.6   |
| P0AE18          | Map          |                                | Monomer               | 113.1                                               | 95.6  | 73.8  | 9.4                                                             | 7.9   | 6.1   |
| P0ACH5          | MarA         |                                | Monomer               | 146.5                                               | 123.7 | 95.6  | 16.6                                                            | 14.0  | 10.8  |
| P31121          | MarB         |                                | Monomer               | 192.7                                               | 162.8 | 125.8 | 29.2                                                            | 24.7  | 19.1  |
|                 |              |                                | Monomer               | 123.2                                               | 104.1 | 80.4  | 11.4                                                            | 9.6   | 7.4   |
| P0AEY1          | MarC         | Cell inner membrane            | Complex with SecB     | 72.1                                                | 58.9  | 47.0  | 3.1                                                             | 2.5   | 2.0   |
|                 |              |                                | Complex with TF (Tig) | 79.7                                                | 67.3  | 52.0  | 4.0                                                             | 3.4   | 2.6   |
| P27245          | MarR         |                                | Monomer               | 143.3                                               | 121.0 | 93.5  | 15.8                                                            | 13.4  | 10.3  |
| P71301          | MatA         | Cytoplasm                      | Monomer               | 123.9                                               | 104.7 | 80.8  | 11.5                                                            | 9.7   | 7.5   |
| P0AAA3          | MatB         |                                | Monomer               | 131.2                                               | 110.8 | 85.6  | 13.1                                                            | 11.0  | 8.5   |
| P77188          | MatC         |                                | Monomer               | 121.4                                               | 102.5 | 79.2  | 11.0                                                            | 9.3   | 7.2   |
| P0AE72          | MazE         |                                | Monomer               | 177.1                                               | 149.6 | 115.6 | 24.7                                                            | 20.8  | 16.1  |



| UniProtKB A. N. | Protein name | Subcellular location | Subunit                                                                  | $D_0 \left( \frac{\mu\text{m}^2}{\text{s}} \right)$ |       |       | $D_{\text{cyto}} \left( \frac{\mu\text{m}^2}{\text{s}} \right)$ |       |       |
|-----------------|--------------|----------------------|--------------------------------------------------------------------------|-----------------------------------------------------|-------|-------|-----------------------------------------------------------------|-------|-------|
|                 |              |                      |                                                                          | 310 K                                               | 303 K | 293 K | 310 K                                                           | 303 K | 293 K |
|                 |              |                      | Heterohexamer (MazF <sub>2</sub> –MazE <sub>2</sub> –MazF <sub>2</sub> ) | 81.8                                                | 69.1  | 53.4  | 4.3                                                             | 3.6   | 2.8   |
| P0AE70          | MazF         |                      | Monomer                                                                  | 160.1                                               | 135.3 | 104.5 | 20.0                                                            | 16.9  | 13.1  |
|                 |              |                      | Homodimer                                                                | 122.0                                               | 99.7  | 79.6  | 11.1                                                            | 9.1   | 7.3   |
|                 |              |                      | Heterohexamer (MazF <sub>2</sub> –MazE <sub>2</sub> –MazF <sub>2</sub> ) | 81.8                                                | 69.1  | 53.4  | 4.3                                                             | 3.6   | 2.8   |
| P0AEY3          | MazG         |                      | Monomer                                                                  | 111.6                                               | 94.2  | 72.8  | 9.1                                                             | 7.7   | 5.9   |
|                 |              |                      | Homodimer                                                                | 85.0                                                | 69.4  | 55.5  | 4.7                                                             | 3.8   | 3.1   |
| Q47154          | MbhA         |                      | Monomer                                                                  | 122.8                                               | 103.8 | 80.2  | 11.3                                                            | 9.5   | 7.4   |
| P0AAX6          | McbA         | Periplasm            | Monomer                                                                  | 180.6                                               | 152.6 | 117.9 | 25.7                                                            | 21.7  | 16.8  |
|                 |              |                      | Complex with SecB                                                        | 77.1                                                | 63.0  | 50.3  | 3.7                                                             | 3.0   | 2.4   |
|                 |              |                      | Complex with TF (Tig)                                                    | 87.1                                                | 73.6  | 56.9  | 5.0                                                             | 4.2   | 3.3   |
| P76114          | McbR         |                      | Monomer                                                                  | 120.2                                               | 101.5 | 78.4  | 10.7                                                            | 9.1   | 7.0   |
| P24200          | McrA         |                      | Monomer                                                                  | 110.2                                               | 93.1  | 71.9  | 8.8                                                             | 7.4   | 5.7   |
| P15005          | McrB         |                      | Monomer                                                                  | 89.6                                                | 75.7  | 58.5  | 5.4                                                             | 4.5   | 3.5   |
| P15006          | McrC         |                      | Monomer                                                                  | 99.6                                                | 84.2  | 65.0  | 6.9                                                             | 5.9   | 4.5   |
| P0AEY5          | MdaB         |                      | Monomer                                                                  | 126.9                                               | 107.2 | 82.8  | 12.1                                                            | 10.3  | 7.9   |
| P0AEY8          | MdfA         | Cell inner membrane  | Monomer                                                                  | 96.2                                                | 81.3  | 62.8  | 6.4                                                             | 5.4   | 4.2   |
|                 |              |                      | Complex with SecB                                                        | 66.6                                                | 54.4  | 43.5  | 2.5                                                             | 2.0   | 1.6   |
|                 |              |                      | Complex with TF (Tig)                                                    | 72.1                                                | 60.9  | 47.1  | 3.1                                                             | 2.6   | 2.0   |
| P61889          | Mdh          |                      | Monomer                                                                  | 108.9                                               | 92.0  | 71.1  | 8.6                                                             | 7.2   | 5.6   |
|                 |              |                      | Homodimer                                                                | 83.0                                                | 67.8  | 54.2  | 4.4                                                             | 3.6   | 2.9   |
| P77265          | MdlA         | Cell inner membrane  | Monomer                                                                  | 82.3                                                | 69.5  | 53.7  | 4.3                                                             | 3.7   | 2.8   |
|                 |              |                      | Complex with SecB                                                        | 62.2                                                | 50.8  | 40.6  | 2.1                                                             | 1.7   | 1.4   |
|                 |              |                      | Complex with TF (Tig)                                                    | 66.4                                                | 56.1  | 43.3  | 2.5                                                             | 2.1   | 1.6   |
| P0AAG5          | MdlB         | Cell inner membrane  | Monomer                                                                  | 82.7                                                | 69.9  | 54.0  | 4.4                                                             | 3.7   | 2.9   |
|                 |              |                      | Complex with SecB                                                        | 62.3                                                | 50.9  | 40.7  | 2.1                                                             | 1.7   | 1.4   |
|                 |              |                      | Complex with TF (Tig)                                                    | 66.6                                                | 56.3  | 43.5  | 2.5                                                             | 2.1   | 1.6   |
| P39401          | MdoB         | Cell inner membrane  | Monomer                                                                  | 74.4                                                | 62.8  | 48.5  | 3.3                                                             | 2.8   | 2.2   |
|                 |              |                      | Complex with SecB                                                        | 59.0                                                | 48.2  | 38.5  | 1.8                                                             | 1.5   | 1.2   |
|                 |              |                      | Complex with TF (Tig)                                                    | 62.4                                                | 52.7  | 40.7  | 2.1                                                             | 1.8   | 1.4   |
| P75920          | MdoC         | Cell membrane        | Monomer                                                                  | 95.9                                                | 81.0  | 62.6  | 6.3                                                             | 5.4   | 4.1   |
|                 |              |                      | Complex with SecB                                                        | 66.5                                                | 54.3  | 43.4  | 2.5                                                             | 2.0   | 1.6   |

| UniProtKB A. N. | Protein name | Subcellular location | Subunit               | $D_0 \left( \frac{\mu\text{m}^2}{\text{s}} \right)$ |       |       | $D_{\text{cyto}} \left( \frac{\mu\text{m}^2}{\text{s}} \right)$ |       |       |
|-----------------|--------------|----------------------|-----------------------|-----------------------------------------------------|-------|-------|-----------------------------------------------------------------|-------|-------|
|                 |              |                      |                       | 310 K                                               | 303 K | 293 K | 310 K                                                           | 303 K | 293 K |
|                 |              |                      | Complex with TF (Tig) | 72.0                                                | 60.8  | 47.0  | 3.1                                                             | 2.6   | 2.0   |
| P40120          | MdoD         | Periplasm            | Monomer               | 84.0                                                | 70.9  | 54.8  | 4.6                                                             | 3.9   | 3.0   |
|                 |              |                      | Complex with SecB     | 62.8                                                | 51.3  | 41.0  | 2.1                                                             | 1.7   | 1.4   |
|                 |              |                      | Complex with TF (Tig) | 67.2                                                | 56.7  | 43.8  | 2.6                                                             | 2.2   | 1.7   |
| P33136          | MdoG         | Periplasm            | Monomer               | 86.7                                                | 73.2  | 56.6  | 4.9                                                             | 4.2   | 3.2   |
|                 |              |                      | Complex with SecB     | 63.7                                                | 52.0  | 41.6  | 2.2                                                             | 1.8   | 1.4   |
|                 |              |                      | Complex with TF (Tig) | 68.4                                                | 57.7  | 44.6  | 2.7                                                             | 2.3   | 1.7   |
| P62517          | MdoH         | Cell inner membrane  | Monomer               | 70.8                                                | 59.8  | 46.2  | 2.9                                                             | 2.5   | 1.9   |
|                 |              |                      | Complex with SecB     | 57.3                                                | 46.8  | 37.4  | 1.7                                                             | 1.3   | 1.1   |
|                 |              |                      | Complex with TF (Tig) | 60.5                                                | 51.1  | 39.4  | 1.9                                                             | 1.6   | 1.2   |
| P76397          | MdtA         | Cell inner membrane  | Monomer               | 96.1                                                | 81.2  | 62.7  | 6.4                                                             | 5.4   | 4.2   |
|                 |              |                      | Complex with SecB     | 66.6                                                | 54.4  | 43.4  | 2.5                                                             | 2.0   | 1.6   |
|                 |              |                      | Complex with TF (Tig) | 72.1                                                | 60.9  | 47.0  | 3.1                                                             | 2.6   | 2.0   |
| P76398          | MdtB         | Cell inner membrane  | Monomer               | 66.9                                                | 56.5  | 43.7  | 2.5                                                             | 2.1   | 1.6   |
|                 |              |                      | Complex with SecB     | 55.4                                                | 45.3  | 36.2  | 1.5                                                             | 1.2   | 1.0   |
|                 |              |                      | Complex with TF (Tig) | 58.1                                                | 49.1  | 37.9  | 1.7                                                             | 1.5   | 1.1   |
| P76399          | MdtC         | Cell inner membrane  | Monomer               | 67.2                                                | 56.7  | 43.8  | 2.6                                                             | 2.2   | 1.7   |
|                 |              |                      | Complex with SecB     | 55.5                                                | 45.4  | 36.2  | 1.5                                                             | 1.2   | 1.0   |
|                 |              |                      | Complex with TF (Tig) | 58.3                                                | 49.3  | 38.0  | 1.7                                                             | 1.5   | 1.1   |
| P36554          | MdtD         | Cell inner membrane  | Monomer               | 91.2                                                | 77.0  | 59.5  | 5.6                                                             | 4.7   | 3.7   |
|                 |              |                      | Complex with SecB     | 65.1                                                | 53.2  | 42.5  | 2.4                                                             | 1.9   | 1.5   |
|                 |              |                      | Complex with TF (Tig) | 70.2                                                | 59.3  | 45.8  | 2.9                                                             | 2.4   | 1.9   |
| P37636          | MdtE         | Cell inner membrane  | Monomer               | 99.0                                                | 83.7  | 64.6  | 6.8                                                             | 5.8   | 4.5   |
|                 |              |                      | Complex with SecB     | 67.3                                                | 55.0  | 43.9  | 2.6                                                             | 2.1   | 1.7   |
|                 |              |                      | Complex with TF (Tig) | 73.1                                                | 61.8  | 47.7  | 3.2                                                             | 2.7   | 2.1   |
| P37637          | MdtF         | Cell inner membrane  | Monomer               | 67.0                                                | 56.6  | 43.7  | 2.5                                                             | 2.1   | 1.7   |
|                 |              |                      | Complex with SecB     | 55.5                                                | 45.3  | 36.2  | 1.5                                                             | 1.2   | 1.0   |
|                 |              |                      | Complex with TF (Tig) | 58.2                                                | 49.2  | 38.0  | 1.7                                                             | 1.5   | 1.1   |
| P25744          | MdtG         | Cell inner membrane  | Monomer               | 96.6                                                | 81.6  | 63.1  | 6.5                                                             | 5.5   | 4.2   |
|                 |              |                      | Complex with SecB     | 66.7                                                | 54.5  | 43.5  | 2.5                                                             | 2.0   | 1.6   |
|                 |              |                      | Complex with TF (Tig) | 72.3                                                | 61.0  | 47.2  | 3.1                                                             | 2.6   | 2.0   |

| UniProtKB A. N. | Protein name | Subcellular location | Subunit               | $D_0 \left( \frac{\mu\text{m}^2}{\text{s}} \right)$ |       |       | $D_{\text{cyto}} \left( \frac{\mu\text{m}^2}{\text{s}} \right)$ |       |       |
|-----------------|--------------|----------------------|-----------------------|-----------------------------------------------------|-------|-------|-----------------------------------------------------------------|-------|-------|
|                 |              |                      |                       | 310 K                                               | 303 K | 293 K | 310 K                                                           | 303 K | 293 K |
| P69367          | MdtH         | Cell inner membrane  | Monomer               | 96.2                                                | 81.3  | 62.8  | 6.4                                                             | 5.4   | 4.2   |
|                 |              |                      | Complex with SecB     | 66.6                                                | 54.4  | 43.4  | 2.5                                                             | 2.0   | 1.6   |
|                 |              |                      | Complex with TF (Tig) | 72.1                                                | 60.9  | 47.1  | 3.1                                                             | 2.6   | 2.0   |
| P69210          | MdtI         | Cell inner membrane  | Monomer               | 162.1                                               | 137.0 | 105.8 | 20.6                                                            | 17.4  | 13.4  |
|                 |              |                      | Complex with SecB     | 76.0                                                | 62.1  | 49.6  | 3.5                                                             | 2.9   | 2.3   |
|                 |              |                      | Complex with TF (Tig) | 85.5                                                | 72.2  | 55.8  | 4.8                                                             | 4.0   | 3.1   |
| P69212          | MdtJ         | Cell inner membrane  | Monomer               | 155.1                                               | 131.0 | 101.2 | 18.8                                                            | 15.8  | 12.2  |
|                 |              |                      | Complex with SecB     | 75.5                                                | 61.7  | 49.3  | 3.5                                                             | 2.8   | 2.3   |
|                 |              |                      | Complex with TF (Tig) | 84.7                                                | 71.6  | 55.3  | 4.7                                                             | 3.9   | 3.1   |
| P37340          | MdtK         | Cell inner membrane  | Monomer               | 92.2                                                | 77.9  | 60.2  | 5.8                                                             | 4.9   | 3.8   |
|                 |              |                      | Complex with SecB     | 65.4                                                | 53.5  | 42.7  | 2.4                                                             | 1.9   | 1.6   |
|                 |              |                      | Complex with TF (Tig) | 70.6                                                | 59.7  | 46.1  | 2.9                                                             | 2.5   | 1.9   |
| P31462          | MdtL         | Cell inner membrane  | Monomer               | 98.8                                                | 83.4  | 64.4  | 6.8                                                             | 5.7   | 4.4   |
|                 |              |                      | Complex with SecB     | 67.2                                                | 54.9  | 43.9  | 2.6                                                             | 2.1   | 1.7   |
|                 |              |                      | Complex with TF (Tig) | 73.0                                                | 61.7  | 47.6  | 3.2                                                             | 2.7   | 2.1   |
| P39386          | MdtM         | Cell inner membrane  | Monomer               | 95.9                                                | 81.0  | 62.6  | 6.3                                                             | 5.4   | 4.1   |
|                 |              |                      | Complex with SecB     | 66.5                                                | 54.3  | 43.4  | 2.5                                                             | 2.0   | 1.6   |
|                 |              |                      | Complex with TF (Tig) | 72.0                                                | 60.8  | 47.0  | 3.1                                                             | 2.6   | 2.0   |
| P32716          | MdtN         | Cell inner membrane  | Monomer               | 103.4                                               | 87.4  | 67.5  | 7.6                                                             | 6.4   | 5.0   |
|                 |              |                      | Complex with SecB     | 68.4                                                | 55.9  | 44.6  | 2.7                                                             | 2.2   | 1.7   |
|                 |              |                      | Complex with TF (Tig) | 74.5                                                | 63.0  | 48.6  | 3.4                                                             | 2.8   | 2.2   |
| P32715          | MdtO         | Cell inner membrane  | Monomer               | 77.8                                                | 65.8  | 50.8  | 3.8                                                             | 3.2   | 2.5   |
|                 |              |                      | Complex with SecB     | 60.4                                                | 49.4  | 39.4  | 1.9                                                             | 1.6   | 1.2   |
|                 |              |                      | Complex with TF (Tig) | 64.2                                                | 54.3  | 41.9  | 2.3                                                             | 1.9   | 1.5   |
| P32714          | MdtP         | Cell outer membrane  | Monomer               | 89.4                                                | 75.5  | 58.4  | 5.3                                                             | 4.5   | 3.5   |
|                 |              |                      | Complex with SecB     | 64.6                                                | 52.8  | 42.2  | 2.3                                                             | 1.9   | 1.5   |
|                 |              |                      | Complex with TF (Tig) | 69.5                                                | 58.7  | 45.4  | 2.8                                                             | 2.4   | 1.8   |
| P33369          | MdtQ         | Cell outer membrane  | Monomer               | 90.3                                                | 76.3  | 58.9  | 5.5                                                             | 4.6   | 3.6   |
|                 |              |                      | Complex with SecB     | 64.9                                                | 53.0  | 42.3  | 2.3                                                             | 1.9   | 1.5   |
|                 |              |                      | Complex with TF (Tig) | 69.9                                                | 59.0  | 45.6  | 2.8                                                             | 2.4   | 1.9   |
| P06720          | MelA         |                      | Monomer               | 91.3                                                | 77.2  | 59.6  | 5.6                                                             | 4.8   | 3.7   |

| UniProtKB A. N. | Protein name | Subcellular location | Subunit               | $D_0 \left( \frac{\mu\text{m}^2}{\text{s}} \right)$ |       |       | $D_{\text{cyto}} \left( \frac{\mu\text{m}^2}{\text{s}} \right)$ |       |       |
|-----------------|--------------|----------------------|-----------------------|-----------------------------------------------------|-------|-------|-----------------------------------------------------------------|-------|-------|
|                 |              |                      |                       | 310 K                                               | 303 K | 293 K | 310 K                                                           | 303 K | 293 K |
|                 |              |                      | Homodimer             | 69.6                                                | 56.9  | 45.4  | 2.8                                                             | 2.3   | 1.8   |
|                 |              |                      | Monomer               | 90.3                                                | 76.2  | 58.9  | 5.5                                                             | 4.6   | 3.6   |
| P02921          | MetB         | Cell inner membrane  | Complex with SecB     | 64.9                                                | 53.0  | 42.3  | 2.3                                                             | 1.9   | 1.5   |
|                 |              |                      | Complex with TF (Tig) | 69.8                                                | 59.0  | 45.6  | 2.8                                                             | 2.4   | 1.9   |
| P0ACH8          | MetR         |                      | Monomer               | 105.7                                               | 89.3  | 68.9  | 8.0                                                             | 6.7   | 5.2   |
|                 |              |                      | Monomer               | 107.3                                               | 90.6  | 70.0  | 8.3                                                             | 7.0   | 5.4   |
| P32166          | MenA         | Cell inner membrane  | Complex with SecB     | 69.2                                                | 56.6  | 45.2  | 2.8                                                             | 2.3   | 1.8   |
|                 |              |                      | Complex with TF (Tig) | 75.7                                                | 63.9  | 49.4  | 3.5                                                             | 3.0   | 2.3   |
|                 |              |                      | Monomer               | 109.8                                               | 92.8  | 71.7  | 8.7                                                             | 7.4   | 5.7   |
| P0ABU0          | MenB         |                      | Homoheptamer          | 54.4                                                | 44.5  | 35.5  | 1.4                                                             | 1.2   | 0.9   |
| P29208          | MenC         |                      | Monomer               | 105.0                                               | 88.7  | 68.5  | 7.9                                                             | 6.6   | 5.1   |
|                 |              |                      | Monomer               | 84.7                                                | 71.6  | 55.3  | 4.7                                                             | 3.9   | 3.0   |
| P17109          | MenD         |                      | Homodimer             | 64.6                                                | 52.7  | 42.1  | 2.3                                                             | 1.9   | 1.5   |
| P37353          | MenE         |                      | Monomer               | 91.7                                                | 77.4  | 59.8  | 5.7                                                             | 4.8   | 3.7   |
| P38051          | MenF         |                      | Monomer               | 92.7                                                | 78.3  | 60.5  | 5.8                                                             | 4.9   | 3.8   |
| P37355          | MenH         |                      | Monomer               | 115.7                                               | 97.8  | 75.5  | 9.9                                                             | 8.3   | 6.4   |
|                 |              |                      | Monomer               | 112.0                                               | 94.6  | 73.1  | 9.1                                                             | 7.7   | 6.0   |
| P0C0T5          | MepA         | Periplasm            | Complex with SecB     | 70.2                                                | 57.3  | 45.8  | 2.9                                                             | 2.3   | 1.9   |
|                 |              |                      | Complex with TF (Tig) | 77.0                                                | 65.0  | 50.2  | 3.7                                                             | 3.1   | 2.4   |
|                 |              |                      | Monomer               | 104.7                                               | 88.5  | 68.3  | 7.8                                                             | 6.6   | 5.1   |
| P07623          | MetA         | Cytoplasm            | Homodimer             | 79.8                                                | 65.2  | 52.1  | 4.0                                                             | 3.3   | 2.6   |
|                 |              |                      | Monomer               | 98.7                                                | 83.4  | 64.4  | 6.8                                                             | 5.7   | 4.4   |
| P00935          | MetB         | Cytoplasm            | Homotetramer          | 57.3                                                | 46.8  | 37.4  | 1.6                                                             | 1.3   | 1.1   |
|                 |              |                      | Monomer               | 97.2                                                | 82.1  | 63.4  | 6.5                                                             | 5.5   | 4.3   |
| P06721          | MetC         | Cytoplasm            | Homotetramer          | 56.5                                                | 46.1  | 36.8  | 1.6                                                             | 1.3   | 1.0   |
| P25665          | MetE         |                      | Monomer               | 74.7                                                | 63.1  | 48.7  | 3.4                                                             | 2.9   | 2.2   |
|                 |              |                      | Monomer               | 107.9                                               | 91.2  | 70.4  | 8.4                                                             | 7.1   | 5.5   |
| P0AEZ1          | MetF         |                      | Homotetramer          | 62.7                                                | 51.2  | 40.9  | 2.1                                                             | 1.7   | 1.4   |
|                 |              |                      | Monomer               | 77.8                                                | 65.7  | 50.8  | 3.8                                                             | 3.2   | 2.5   |
| P00959          | MetG         | Cytoplasm            | Homodimer             | 59.3                                                | 48.4  | 38.7  | 1.8                                                             | 1.5   | 1.2   |
| P13009          | MetH         |                      | Monomer               | 62.0                                                | 52.4  | 40.5  | 2.1                                                             | 1.7   | 1.3   |

| UniProtKB A. N. | Protein name | Subcellular location | Subunit               | $D_0 \left( \frac{\mu\text{m}^2}{\text{s}} \right)$ |       |       | $D_{\text{cyto}} \left( \frac{\mu\text{m}^2}{\text{s}} \right)$ |       |       |
|-----------------|--------------|----------------------|-----------------------|-----------------------------------------------------|-------|-------|-----------------------------------------------------------------|-------|-------|
|                 |              |                      |                       | 310 K                                               | 303 K | 293 K | 310 K                                                           | 303 K | 293 K |
| P31547          | MetI         | Cell inner membrane  | Monomer               | 123.9                                               | 104.7 | 80.9  | 11.5                                                            | 9.7   | 7.5   |
|                 |              |                      | Complex with SecB     | 72.2                                                | 59.0  | 47.1  | 3.1                                                             | 2.5   | 2.0   |
|                 |              |                      | Complex with TF (Tig) | 79.8                                                | 67.4  | 52.1  | 4.0                                                             | 3.4   | 2.6   |
| P0A8U6          | MetJ         | Cytoplasm            | Monomer               | 159.9                                               | 135.1 | 104.3 | 20.0                                                            | 16.9  | 13.0  |
|                 |              |                      | Homodimer             | 121.8                                               | 99.5  | 79.5  | 11.1                                                            | 9.1   | 7.2   |
| P0A817          | MetK         | Cytoplasm            | Monomer               | 98.3                                                | 83.1  | 64.2  | 6.7                                                             | 5.7   | 4.4   |
|                 |              |                      | Homotetramer          | 57.1                                                | 46.7  | 37.3  | 1.6                                                             | 1.3   | 1.1   |
| P00562          | MetL         |                      | Monomer               | 73.3                                                | 61.9  | 47.8  | 3.2                                                             | 2.7   | 2.1   |
|                 |              |                      | Homotetramer          | 42.5                                                | 34.8  | 27.8  | 0.7                                                             | 0.6   | 0.4   |
| P30750          | MetN         | Cell inner membrane  | Monomer               | 102.4                                               | 86.6  | 66.9  | 7.4                                                             | 6.3   | 4.8   |
|                 |              |                      | Complex with SecB     | 68.2                                                | 55.7  | 44.5  | 2.7                                                             | 2.2   | 1.7   |
|                 |              |                      | Complex with TF (Tig) | 74.2                                                | 62.7  | 48.4  | 3.3                                                             | 2.8   | 2.2   |
| P28635          | MetQ         | Cell membrane        | Monomer               | 113.0                                               | 95.5  | 73.7  | 9.3                                                             | 7.9   | 6.1   |
|                 |              |                      | Complex with SecB     | 70.4                                                | 57.5  | 45.9  | 2.9                                                             | 2.4   | 1.9   |
|                 |              |                      | Complex with TF (Tig) | 77.3                                                | 65.3  | 50.4  | 3.7                                                             | 3.1   | 2.4   |
| P0A9F9          | MetR         | Cytoplasm            | Monomer               | 104.8                                               | 88.6  | 68.4  | 7.8                                                             | 6.6   | 5.1   |
| P30958          | Mfd          |                      | Monomer               | 63.1                                                | 53.3  | 41.2  | 2.2                                                             | 1.8   | 1.4   |
| P0AAG8          | MglA         | Cell inner membrane  | Monomer               | 87.6                                                | 74.0  | 57.1  | 5.1                                                             | 4.3   | 3.3   |
|                 |              |                      | Complex with SecB     | 64.0                                                | 52.3  | 41.8  | 2.2                                                             | 1.8   | 1.5   |
|                 |              |                      | Complex with TF (Tig) | 68.7                                                | 58.1  | 44.9  | 2.7                                                             | 2.3   | 1.8   |
| P0AEE5          | MglB         | Periplasm            | Monomer               | 104.7                                               | 88.5  | 68.4  | 7.8                                                             | 6.6   | 5.1   |
|                 |              |                      | Complex with SecB     | 68.7                                                | 56.1  | 44.8  | 2.7                                                             | 2.2   | 1.8   |
|                 |              |                      | Complex with TF (Tig) | 74.9                                                | 63.3  | 48.9  | 3.4                                                             | 2.9   | 2.2   |
| P23200          | MglC         | Cell inner membrane  | Monomer               | 104.9                                               | 88.6  | 68.5  | 7.9                                                             | 6.6   | 5.1   |
|                 |              |                      | Complex with SecB     | 68.7                                                | 56.1  | 44.8  | 2.7                                                             | 2.2   | 1.8   |
|                 |              |                      | Complex with TF (Tig) | 75.0                                                | 63.4  | 48.9  | 3.4                                                             | 2.9   | 2.2   |
| P64512          | MgrB         |                      | Monomer               | 217.3                                               | 183.6 | 141.8 | 37.0                                                            | 31.2  | 24.1  |
| P0A731          | MgsA         | Cytoplasm            | Monomer               | 140.4                                               | 118.6 | 91.6  | 15.2                                                            | 12.8  | 9.9   |
|                 |              |                      | Homoheptamer          | 69.5                                                | 56.8  | 45.4  | 2.8                                                             | 2.3   | 1.8   |
| P0ABB8          | MgtA         | Cell inner membrane  | Monomer               | 70.1                                                | 59.2  | 45.7  | 2.9                                                             | 2.4   | 1.9   |
|                 |              |                      | Complex with SecB     | 57.0                                                | 46.6  | 37.2  | 1.6                                                             | 1.3   | 1.1   |

| UniProtKB A. N. | Protein name | Subcellular location | Subunit               | $D_0 \left( \frac{\mu\text{m}^2}{\text{s}} \right)$ |       |       | $D_{\text{cyto}} \left( \frac{\mu\text{m}^2}{\text{s}} \right)$ |       |       |
|-----------------|--------------|----------------------|-----------------------|-----------------------------------------------------|-------|-------|-----------------------------------------------------------------|-------|-------|
|                 |              |                      |                       | 310 K                                               | 303 K | 293 K | 310 K                                                           | 303 K | 293 K |
|                 |              |                      | Complex with TF (Tig) | 60.0                                                | 50.7  | 39.2  | 1.9                                                             | 1.6   | 1.2   |
| E2JKY7          | MgtL         |                      | Monomer               | 316.7                                               | 267.6 | 206.7 | 74.1                                                            | 62.6  | 48.3  |
| P77397          | MhpA         |                      | Monomer               | 84.3                                                | 71.2  | 55.0  | 4.6                                                             | 3.9   | 3.0   |
| P0ABR9          | MhpB         |                      | Monomer               | 106.5                                               | 90.0  | 69.5  | 8.1                                                             | 6.9   | 5.3   |
|                 |              |                      | Homotetramer          | 61.9                                                | 50.5  | 40.4  | 2.0                                                             | 1.7   | 1.3   |
| P77044          | MhpC         |                      | Monomer               | 108.6                                               | 91.7  | 70.9  | 8.5                                                             | 7.2   | 5.6   |
|                 |              |                      | Homodimer             | 82.7                                                | 67.6  | 54.0  | 4.4                                                             | 3.6   | 2.9   |
| P77608          | MhpD         |                      | Monomer               | 113.8                                               | 96.2  | 74.3  | 9.5                                                             | 8.0   | 6.2   |
| P51020          | MhpE         |                      | Monomer               | 103.9                                               | 87.8  | 67.8  | 7.7                                                             | 6.5   | 5.0   |
| P77580          | MhpF         |                      | Monomer               | 107.5                                               | 90.8  | 70.1  | 8.3                                                             | 7.0   | 5.4   |
| P77569          | MhpR         |                      | Monomer               | 110.3                                               | 93.2  | 72.0  | 8.8                                                             | 7.5   | 5.8   |
| P77589          | MhpT         | Cell inner membrane  | Monomer               | 98.7                                                | 83.4  | 64.4  | 6.8                                                             | 5.7   | 4.4   |
|                 |              |                      | Complex with SecB     | 67.2                                                | 54.9  | 43.9  | 2.6                                                             | 2.1   | 1.7   |
|                 |              |                      | Complex with TF (Tig) | 73.0                                                | 61.7  | 47.6  | 3.2                                                             | 2.7   | 2.1   |
| P16384          | MiaA         |                      | Monomer               | 105.5                                               | 89.1  | 68.8  | 8.0                                                             | 6.7   | 5.2   |
| P0AEI1          | MiaB         | Cytoplasm            | Monomer               | 89.3                                                | 75.4  | 58.3  | 5.3                                                             | 4.5   | 3.5   |
| P18196          | MinC         |                      | Monomer               | 120.9                                               | 102.1 | 78.9  | 10.9                                                            | 9.2   | 7.1   |
|                 |              |                      | Homodimer             | 92.1                                                | 75.3  | 60.1  | 5.7                                                             | 4.7   | 3.8   |
| P0AEZ3          | MinD         | Cell inner membrane  | Monomer               | 112.7                                               | 95.2  | 73.6  | 9.3                                                             | 7.8   | 6.1   |
|                 |              |                      | Complex with SecB     | 70.3                                                | 57.4  | 45.9  | 2.9                                                             | 2.4   | 1.9   |
|                 |              |                      | Complex with TF (Tig) | 77.2                                                | 65.2  | 50.4  | 3.7                                                             | 3.1   | 2.4   |
| P0A734          | MinE         |                      | Monomer               | 171.0                                               | 144.4 | 111.6 | 23.0                                                            | 19.4  | 15.0  |
| P03817          | MioC         |                      | Monomer               | 144.2                                               | 121.8 | 94.1  | 16.0                                                            | 13.6  | 10.5  |
|                 |              |                      | Homodimer             | 109.9                                               | 89.8  | 71.7  | 8.7                                                             | 7.1   | 5.7   |
| P0A908          | MipA         | Cell outer membrane  | Monomer               | 115.5                                               | 97.6  | 75.4  | 9.8                                                             | 8.3   | 6.4   |
|                 |              |                      | Complex with SecB     | 70.8                                                | 57.9  | 46.2  | 2.9                                                             | 2.4   | 1.9   |
|                 |              |                      | Complex with TF (Tig) | 77.9                                                | 65.8  | 50.8  | 3.8                                                             | 3.2   | 2.5   |
| P76506          | MlaA         | Cell outer membrane  | Monomer               | 115.2                                               | 97.3  | 75.1  | 9.7                                                             | 8.2   | 6.4   |
|                 |              |                      | Complex with SecB     | 70.8                                                | 57.8  | 46.2  | 2.9                                                             | 2.4   | 1.9   |
|                 |              |                      | Complex with TF (Tig) | 77.8                                                | 65.7  | 50.8  | 3.8                                                             | 3.2   | 2.5   |
| P64602          | MlaB         | Cytoplasm            | Monomer               | 168.1                                               | 142.0 | 109.7 | 22.2                                                            | 18.7  | 14.5  |

| UniProtKB A. N. | Protein name | Subcellular location | Subunit               | $D_0 \left( \frac{\mu\text{m}^2}{\text{s}} \right)$ |       |       | $D_{\text{cyto}} \left( \frac{\mu\text{m}^2}{\text{s}} \right)$ |       |       |
|-----------------|--------------|----------------------|-----------------------|-----------------------------------------------------|-------|-------|-----------------------------------------------------------------|-------|-------|
|                 |              |                      |                       | 310 K                                               | 303 K | 293 K | 310 K                                                           | 303 K | 293 K |
| P0ADV7          | MlaC         | Periplasm            | Monomer               | 122.5                                               | 103.5 | 79.9  | 11.2                                                            | 9.5   | 7.3   |
|                 |              |                      | Complex with SecB     | 72.0                                                | 58.8  | 47.0  | 3.1                                                             | 2.5   | 2.0   |
|                 |              |                      | Complex with TF (Tig) | 79.5                                                | 67.2  | 51.9  | 4.0                                                             | 3.4   | 2.6   |
| P64604          | MlaD         | Cell inner membrane  | Monomer               | 132.6                                               | 112.0 | 86.5  | 13.4                                                            | 11.3  | 8.7   |
|                 |              |                      | Complex with SecB     | 73.3                                                | 59.9  | 47.9  | 3.2                                                             | 2.6   | 2.1   |
|                 |              |                      | Complex with TF (Tig) | 81.5                                                | 68.8  | 53.2  | 4.2                                                             | 3.6   | 2.8   |
| P64606          | MlaE         | Cell inner membrane  | Monomer               | 115.4                                               | 97.5  | 75.3  | 9.8                                                             | 8.3   | 6.4   |
|                 |              |                      | Complex with SecB     | 70.8                                                | 57.8  | 46.2  | 2.9                                                             | 2.4   | 1.9   |
|                 |              |                      | Complex with TF (Tig) | 77.9                                                | 65.8  | 50.8  | 3.8                                                             | 3.2   | 2.5   |
| P63386          | MlaF         | Cell inner membrane  | Monomer               | 113.5                                               | 95.9  | 74.1  | 9.4                                                             | 8.0   | 6.2   |
| P50456          | Mlc          |                      | Monomer               | 96.2                                                | 81.3  | 62.8  | 6.4                                                             | 5.4   | 4.2   |
|                 |              |                      | Homodimer             | 73.3                                                | 59.9  | 47.9  | 3.2                                                             | 2.6   | 2.1   |
| P28224          | MliC         | Cell outer membrane  | Monomer               | 157.7                                               | 133.3 | 102.9 | 19.4                                                            | 16.4  | 12.7  |
|                 |              |                      | Complex with SecB     | 75.7                                                | 61.9  | 49.4  | 3.5                                                             | 2.9   | 2.3   |
|                 |              |                      | Complex with TF (Tig) | 85.0                                                | 71.8  | 55.5  | 4.7                                                             | 4.0   | 3.1   |
| P33358          | MlrA         |                      | Monomer               | 115.2                                               | 97.3  | 75.1  | 9.7                                                             | 8.2   | 6.4   |
| P0A935          | MltA         | Cell outer membrane  | Monomer               | 99.8                                                | 84.3  | 65.1  | 7.0                                                             | 5.9   | 4.6   |
|                 |              |                      | Complex with SecB     | 67.5                                                | 55.1  | 44.1  | 2.6                                                             | 2.1   | 1.7   |
|                 |              |                      | Complex with TF (Tig) | 73.4                                                | 62.0  | 47.9  | 3.2                                                             | 2.7   | 2.1   |
| P41052          | MltB         | Cell outer membrane  | Monomer               | 99.9                                                | 84.4  | 65.2  | 7.0                                                             | 5.9   | 4.6   |
|                 |              |                      | Complex with SecB     | 67.5                                                | 55.2  | 44.1  | 2.6                                                             | 2.1   | 1.7   |
|                 |              |                      | Complex with TF (Tig) | 73.4                                                | 62.0  | 47.9  | 3.2                                                             | 2.7   | 2.1   |
| P0C066          | MltC         | Cell outer membrane  | Monomer               | 100.1                                               | 84.5  | 65.3  | 7.0                                                             | 5.9   | 4.6   |
|                 |              |                      | Complex with SecB     | 67.6                                                | 55.2  | 44.1  | 2.6                                                             | 2.1   | 1.7   |
|                 |              |                      | Complex with TF (Tig) | 73.5                                                | 62.1  | 47.9  | 3.2                                                             | 2.7   | 2.1   |
| P0AEZ7          | MltD         | Cell membrane        | Monomer               | 92.2                                                | 77.9  | 60.2  | 5.8                                                             | 4.9   | 3.8   |
|                 |              |                      | Complex with SecB     | 65.4                                                | 53.5  | 42.7  | 2.4                                                             | 1.9   | 1.6   |
|                 |              |                      | Complex with TF (Tig) | 70.6                                                | 59.7  | 46.1  | 2.9                                                             | 2.5   | 1.9   |
| P0AGC5          | MltF         | Cell outer membrane  | Monomer               | 86.4                                                | 73.0  | 56.4  | 4.9                                                             | 4.1   | 3.2   |
|                 |              |                      | Complex with SecB     | 63.6                                                | 52.0  | 41.5  | 2.2                                                             | 1.8   | 1.4   |
|                 |              |                      | Complex with TF (Tig) | 68.3                                                | 57.7  | 44.5  | 2.7                                                             | 2.3   | 1.7   |

| UniProtKB A. N. | Protein name | Subcellular location | Subunit                                                | $D_0 \left( \frac{\mu\text{m}^2}{\text{s}} \right)$ |       |       | $D_{\text{cyto}} \left( \frac{\mu\text{m}^2}{\text{s}} \right)$ |       |       |
|-----------------|--------------|----------------------|--------------------------------------------------------|-----------------------------------------------------|-------|-------|-----------------------------------------------------------------|-------|-------|
|                 |              |                      |                                                        | 310 K                                               | 303 K | 293 K | 310 K                                                           | 303 K | 293 K |
| P52045          | MmcD         |                      | Monomer                                                | 113.4                                               | 95.8  | 74.0  | 9.4                                                             | 7.9   | 6.1   |
|                 |              |                      | Homotrimer                                             | 73.7                                                | 60.2  | 48.1  | 3.3                                                             | 2.7   | 2.1   |
| Q47690          | MmuM         |                      | Monomer                                                | 107.5                                               | 90.8  | 70.1  | 8.3                                                             | 7.0   | 5.4   |
| Q47689          | MmuP         | Cell inner membrane  | Monomer                                                | 91.4                                                | 77.2  | 59.7  | 5.6                                                             | 4.8   | 3.7   |
|                 |              |                      | Complex with SecB                                      | 65.2                                                | 53.3  | 42.6  | 2.4                                                             | 1.9   | 1.5   |
|                 |              |                      | Complex with TF (Tig)                                  | 70.3                                                | 59.4  | 45.9  | 2.9                                                             | 2.4   | 1.9   |
| P54746          | MngB         |                      | Monomer                                                | 70.0                                                | 59.1  | 45.6  | 2.8                                                             | 2.4   | 1.9   |
| P13669          | MngR         |                      | Monomer                                                | 114.8                                               | 97.0  | 74.9  | 9.7                                                             | 8.2   | 6.3   |
| P25745          | MnmA         | Cytoplasm            | Monomer                                                | 99.3                                                | 83.9  | 64.8  | 6.9                                                             | 5.8   | 4.5   |
| P77182          | MnmC         | Cytoplasm            | Monomer                                                | 78.5                                                | 66.4  | 51.3  | 3.9                                                             | 3.3   | 2.5   |
| P25522          | MnmE         | Cytoplasm            | Monomer                                                | 92.4                                                | 78.0  | 60.3  | 5.8                                                             | 4.9   | 3.8   |
|                 |              |                      | Homodimer                                              | 70.4                                                | 57.5  | 45.9  | 2.9                                                             | 2.4   | 1.9   |
|                 |              |                      | Heterotetramer (MnmE <sub>2</sub> –MnmG <sub>2</sub> ) | 49.8                                                | 42.1  | 32.5  | 1.1                                                             | 0.9   | 0.7   |
| P0A6U3          | MnmG         | Cytoplasm            | Monomer                                                | 80.7                                                | 68.2  | 52.6  | 4.1                                                             | 3.5   | 2.7   |
|                 |              |                      | Homodimer                                              | 61.5                                                | 50.2  | 40.1  | 2.0                                                             | 1.6   | 1.3   |
|                 |              |                      | Heterotetramer (MnmE <sub>2</sub> –MnmG <sub>2</sub> ) | 49.8                                                | 42.1  | 32.5  | 1.1                                                             | 0.9   | 0.7   |
| P0A769          | MntH         | Cell inner membrane  | Monomer                                                | 96.3                                                | 81.4  | 62.9  | 6.4                                                             | 5.4   | 4.2   |
|                 |              |                      | Complex with SecB                                      | 66.6                                                | 54.4  | 43.5  | 2.5                                                             | 2.0   | 1.6   |
|                 |              |                      | Complex with TF (Tig)                                  | 72.2                                                | 61.0  | 47.1  | 3.1                                                             | 2.6   | 2.0   |
| P0A9F1          | MntR         | Cytoplasm            | Monomer                                                | 138.1                                               | 116.7 | 90.1  | 14.6                                                            | 12.4  | 9.5   |
|                 |              |                      | Homodimer                                              | 105.2                                               | 86.0  | 68.7  | 7.9                                                             | 6.5   | 5.2   |
| P30745          | MoaA         |                      | Monomer                                                | 102.9                                               | 87.0  | 67.2  | 7.5                                                             | 6.3   | 4.9   |
|                 |              |                      | Homodimer                                              | 78.4                                                | 64.1  | 51.2  | 3.8                                                             | 3.1   | 2.5   |
| P0AEZ9          | MoaB         |                      | Monomer                                                | 135.1                                               | 114.1 | 88.1  | 13.9                                                            | 11.8  | 9.1   |
|                 |              |                      | Homoheptamer                                           | 66.9                                                | 54.7  | 43.7  | 2.5                                                             | 2.1   | 1.7   |
| P0A738          | MoaC         |                      | Monomer                                                | 138.6                                               | 117.1 | 90.5  | 14.7                                                            | 12.5  | 9.6   |
|                 |              |                      | Homoheptamer                                           | 68.7                                                | 56.1  | 44.8  | 2.7                                                             | 2.2   | 1.8   |
| P30748          | MoaD         |                      | Monomer                                                | 181.7                                               | 153.5 | 118.6 | 26.0                                                            | 22.0  | 17.0  |
|                 |              |                      | Heterotetramer (MoaD <sub>2</sub> –MoaE <sub>2</sub> ) | 106.8                                               | 90.2  | 69.7  | 8.2                                                             | 6.9   | 5.3   |
| P30749          | MoaE         |                      | Monomer                                                | 140.2                                               | 118.4 | 91.5  | 15.1                                                            | 12.8  | 9.9   |
|                 |              |                      | Heterotetramer (MoaD <sub>2</sub> –MoaE <sub>2</sub> ) | 106.8                                               | 90.2  | 69.7  | 8.2                                                             | 6.9   | 5.3   |



| UniProtKB A. N. | Protein name | Subcellular location | Subunit               | $D_0 \left( \frac{\mu\text{m}^2}{\text{s}} \right)$ |       |       | $D_{\text{cyto}} \left( \frac{\mu\text{m}^2}{\text{s}} \right)$ |       |       |
|-----------------|--------------|----------------------|-----------------------|-----------------------------------------------------|-------|-------|-----------------------------------------------------------------|-------|-------|
|                 |              |                      |                       | 310 K                                               | 303 K | 293 K | 310 K                                                           | 303 K | 293 K |
| P32173          | MobA         | Cytoplasm            | Monomer               | 127.5                                               | 107.7 | 83.2  | 12.3                                                            | 10.4  | 8.0   |
| P32125          | MobB         |                      | Monomer               | 133.1                                               | 112.5 | 86.9  | 13.5                                                            | 11.4  | 8.8   |
|                 |              |                      | Homodimer             | 101.5                                               | 82.9  | 66.2  | 7.3                                                             | 5.9   | 4.7   |
| P37329          | ModA         | Periplasm            | Monomer               | 116.3                                               | 98.2  | 75.9  | 10.0                                                            | 8.4   | 6.5   |
|                 |              |                      | Complex with SecB     | 70.9                                                | 58.0  | 46.3  | 3.0                                                             | 2.4   | 1.9   |
|                 |              |                      | Complex with TF (Tig) | 78.1                                                | 66.0  | 51.0  | 3.8                                                             | 3.2   | 2.5   |
| P0AF01          | ModB         | Cell inner membrane  | Monomer               | 120.6                                               | 101.9 | 78.7  | 10.8                                                            | 9.1   | 7.1   |
|                 |              |                      | Complex with SecB     | 71.7                                                | 58.5  | 46.8  | 3.0                                                             | 2.5   | 2.0   |
|                 |              |                      | Complex with TF (Tig) | 79.1                                                | 66.8  | 51.6  | 3.9                                                             | 3.3   | 2.6   |
| P09833          | ModC         | Cell inner membrane  | Monomer               | 101.1                                               | 85.4  | 66.0  | 7.2                                                             | 6.1   | 4.7   |
|                 |              |                      | Complex with SecB     | 67.8                                                | 55.4  | 44.3  | 2.6                                                             | 2.1   | 1.7   |
|                 |              |                      | Complex with TF (Tig) | 73.8                                                | 62.3  | 48.1  | 3.3                                                             | 2.8   | 2.1   |
| P0A9G8          | ModE         | Cytoplasm            | Monomer               | 114.8                                               | 97.0  | 74.9  | 9.7                                                             | 8.2   | 6.3   |
|                 |              |                      | Homodimer             | 87.5                                                | 71.5  | 57.1  | 5.1                                                             | 4.1   | 3.3   |
| P31060          | ModF         | Cell inner membrane  | Monomer               | 88.7                                                | 75.0  | 57.9  | 5.2                                                             | 4.4   | 3.4   |
|                 |              |                      | Complex with SecB     | 64.4                                                | 52.6  | 42.0  | 2.3                                                             | 1.9   | 1.5   |
|                 |              |                      | Complex with TF (Tig) | 69.2                                                | 58.5  | 45.2  | 2.8                                                             | 2.3   | 1.8   |
| P12281          | MoeA         |                      | Monomer               | 96.5                                                | 81.5  | 62.9  | 6.4                                                             | 5.4   | 4.2   |
|                 |              |                      | Homodimer             | 73.5                                                | 60.1  | 48.0  | 3.2                                                             | 2.7   | 2.1   |
| P12282          | MoeB         |                      | Monomer               | 117.4                                               | 99.1  | 76.6  | 10.2                                                            | 8.6   | 6.6   |
|                 |              |                      | Homodimer             | 89.4                                                | 73.1  | 58.4  | 5.3                                                             | 4.4   | 3.5   |
| P0AF03          | Mog          |                      | Monomer               | 128.4                                               | 108.5 | 83.8  | 12.5                                                            | 10.5  | 8.1   |
|                 |              |                      | Homotrimer            | 83.5                                                | 68.2  | 54.5  | 4.5                                                             | 3.7   | 2.9   |
| P76096          | MokB         |                      | Monomer               | 212.2                                               | 179.3 | 138.5 | 35.3                                                            | 29.9  | 23.1  |
| P33236          | MokC         | Membrane             | Monomer               | 190.7                                               | 161.1 | 124.5 | 28.6                                                            | 24.2  | 18.7  |
|                 |              |                      | Complex with SecB     | 77.6                                                | 63.4  | 50.6  | 3.7                                                             | 3.0   | 2.4   |
|                 |              |                      | Complex with TF (Tig) | 87.8                                                | 74.2  | 57.3  | 5.1                                                             | 4.3   | 3.3   |
| P09348          | MotA         | Cell inner membrane  | Monomer               | 109.3                                               | 92.4  | 71.3  | 8.6                                                             | 7.3   | 5.6   |
|                 |              |                      | Complex with SecB     | 69.7                                                | 56.9  | 45.5  | 2.8                                                             | 2.3   | 1.8   |
|                 |              |                      | Complex with TF (Tig) | 76.3                                                | 64.4  | 49.8  | 3.6                                                             | 3.0   | 2.3   |
| P0AF06          | MotB         | Cell inner membrane  | Monomer               | 106.6                                               | 90.0  | 69.5  | 8.1                                                             | 6.9   | 5.3   |

| UniProtKB A. N. | Protein name | Subcellular location | Subunit                                       | $D_0 \left( \frac{\mu\text{m}^2}{\text{s}} \right)$ |       |       | $D_{\text{cyto}} \left( \frac{\mu\text{m}^2}{\text{s}} \right)$ |       |       |
|-----------------|--------------|----------------------|-----------------------------------------------|-----------------------------------------------------|-------|-------|-----------------------------------------------------------------|-------|-------|
|                 |              |                      |                                               | 310 K                                               | 303 K | 293 K | 310 K                                                           | 303 K | 293 K |
|                 |              |                      | Complex with SecB                             | 69.1                                                | 56.4  | 45.1  | 2.8                                                             | 2.2   | 1.8   |
|                 |              |                      | Complex with TF (Tig)                         | 75.5                                                | 63.8  | 49.3  | 3.5                                                             | 2.9   | 2.3   |
| P0ACV6          | MpaA         |                      | Monomer                                       | 117.6                                               | 99.4  | 76.8  | 10.2                                                            | 8.6   | 6.7   |
|                 |              |                      | Monomer                                       | 91.9                                                | 77.6  | 60.0  | 5.7                                                             | 4.8   | 3.7   |
| P37773          | Mpl          | Secreted             | Complex with SecB                             | 65.3                                                | 53.4  | 42.6  | 2.4                                                             | 1.9   | 1.5   |
|                 |              |                      | Complex with TF (Tig)                         | 70.5                                                | 59.6  | 46.0  | 2.9                                                             | 2.5   | 1.9   |
|                 |              |                      | Monomer                                       | 85.5                                                | 72.3  | 55.8  | 4.8                                                             | 4.0   | 3.1   |
| P77348          | MppA         | Periplasm            | Complex with SecB                             | 63.3                                                | 51.7  | 41.3  | 2.2                                                             | 1.8   | 1.4   |
|                 |              |                      | Complex with TF (Tig)                         | 67.9                                                | 57.3  | 44.3  | 2.6                                                             | 2.2   | 1.7   |
| P0ACR9          | MprA         |                      | Monomer                                       | 130.0                                               | 109.9 | 84.9  | 12.8                                                            | 10.8  | 8.4   |
| P33940          | Mqo          |                      | Monomer                                       | 85.3                                                | 72.1  | 55.7  | 4.8                                                             | 4.0   | 3.1   |
|                 |              |                      | Monomer                                       | 148.3                                               | 125.3 | 96.8  | 17.1                                                            | 14.4  | 11.1  |
| Q46864          | MqsA         |                      | Homodimer                                     | 113.0                                               | 92.3  | 73.8  | 9.3                                                             | 7.6   | 6.1   |
|                 |              |                      | Heterotetramer (MqsR–MqsA <sub>2</sub> –MqsR) | 90.5                                                | 76.4  | 59.0  | 5.5                                                             | 4.6   | 3.6   |
|                 |              |                      | Monomer                                       | 164.8                                               | 139.3 | 107.6 | 21.3                                                            | 18.0  | 13.9  |
| Q46865          | MqsR         |                      | Homodimer                                     | 125.6                                               | 102.6 | 82.0  | 11.9                                                            | 9.7   | 7.7   |
|                 |              |                      | Heterotetramer (MqsR–MqsA <sub>2</sub> –MqsR) | 90.5                                                | 76.4  | 59.0  | 5.5                                                             | 4.6   | 3.6   |
|                 |              |                      | Monomer                                       | 100.3                                               | 84.7  | 65.5  | 7.1                                                             | 6.0   | 4.6   |
| P0A6W3          | MraY         | Cell inner membrane  | Complex with SecB                             | 67.6                                                | 55.3  | 44.1  | 2.6                                                             | 2.1   | 1.7   |
|                 |              |                      | Complex with TF (Tig)                         | 73.5                                                | 62.1  | 48.0  | 3.2                                                             | 2.7   | 2.1   |
|                 |              |                      | Monomer                                       | 138.9                                               | 117.3 | 90.6  | 14.8                                                            | 12.5  | 9.7   |
| P22186          | MraZ         |                      | Homooctamer                                   | 61.5                                                | 50.2  | 40.1  | 2.0                                                             | 1.6   | 1.3   |
|                 |              |                      | Monomer                                       | 71.8                                                | 60.6  | 46.8  | 3.0                                                             | 2.6   | 2.0   |
| P02918          | MrcA         | Cell inner membrane  | Complex with SecB                             | 57.8                                                | 47.2  | 37.7  | 1.7                                                             | 1.4   | 1.1   |
|                 |              |                      | Complex with TF (Tig)                         | 61.0                                                | 51.5  | 39.8  | 2.0                                                             | 1.7   | 1.3   |
|                 |              |                      | Monomer                                       | 71.6                                                | 60.5  | 46.7  | 3.0                                                             | 2.6   | 2.0   |
| P02919          | MrcB         | Cell inner membrane  | Complex with SecB                             | 57.7                                                | 47.1  | 37.7  | 1.7                                                             | 1.4   | 1.1   |
|                 |              |                      | Complex with TF (Tig)                         | 60.9                                                | 51.4  | 39.7  | 2.0                                                             | 1.7   | 1.3   |
|                 |              |                      | Monomer                                       | 80.1                                                | 67.6  | 52.3  | 4.0                                                             | 3.4   | 2.6   |
| P0AD65          | MrdA         | Cell inner membrane  | Complex with SecB                             | 61.3                                                | 50.1  | 40.0  | 2.0                                                             | 1.6   | 1.3   |
|                 |              |                      | Complex with TF (Tig)                         | 65.3                                                | 55.2  | 42.6  | 2.4                                                             | 2.0   | 1.5   |

| UniProtKB A. N. | Protein name | Subcellular location | Subunit               | $D_0 \left( \frac{\mu\text{m}^2}{\text{s}} \right)$ |       |       | $D_{\text{cyto}} \left( \frac{\mu\text{m}^2}{\text{s}} \right)$ |       |       |
|-----------------|--------------|----------------------|-----------------------|-----------------------------------------------------|-------|-------|-----------------------------------------------------------------|-------|-------|
|                 |              |                      |                       | 310 K                                               | 303 K | 293 K | 310 K                                                           | 303 K | 293 K |
| P0ABG7          | MrdB         | Cell inner membrane  | Monomer               | 99.7                                                | 84.3  | 65.1  | 7.0                                                             | 5.9   | 4.5   |
|                 |              |                      | Complex with SecB     | 67.5                                                | 55.1  | 44.0  | 2.6                                                             | 2.1   | 1.7   |
|                 |              |                      | Complex with TF (Tig) | 73.3                                                | 62.0  | 47.9  | 3.2                                                             | 2.7   | 2.1   |
| P0A9X4          | MreB         |                      | Monomer               | 103.4                                               | 87.3  | 67.4  | 7.6                                                             | 6.4   | 4.9   |
| P16926          | MreC         |                      | Monomer               | 100.7                                               | 85.0  | 65.7  | 7.1                                                             | 6.0   | 4.6   |
| P0ABH4          | MreD         | Cell inner membrane  | Monomer               | 134.7                                               | 113.8 | 87.9  | 13.9                                                            | 11.7  | 9.0   |
|                 |              |                      | Complex with SecB     | 73.6                                                | 60.1  | 48.0  | 3.3                                                             | 2.7   | 2.1   |
|                 |              |                      | Complex with TF (Tig) | 81.9                                                | 69.2  | 53.4  | 4.3                                                             | 3.6   | 2.8   |
| P0AF08          | Mrp          |                      | Monomer               | 100.3                                               | 84.7  | 65.4  | 7.1                                                             | 6.0   | 4.6   |
| P24202          | Mrr          |                      | Monomer               | 107.4                                               | 90.7  | 70.1  | 8.3                                                             | 7.0   | 5.4   |
| P60752          | MsbA         | Cell inner membrane  | Monomer               | 83.1                                                | 70.2  | 54.2  | 4.4                                                             | 3.8   | 2.9   |
|                 |              |                      | Complex with SecB     | 62.5                                                | 51.0  | 40.8  | 2.1                                                             | 1.7   | 1.4   |
|                 |              |                      | Complex with TF (Tig) | 66.8                                                | 56.4  | 43.6  | 2.5                                                             | 2.1   | 1.6   |
| P24205          | MsbB         | Cell inner membrane  | Monomer               | 102.9                                               | 86.9  | 67.1  | 7.5                                                             | 6.3   | 4.9   |
|                 |              |                      | Complex with SecB     | 68.2                                                | 55.8  | 44.5  | 2.7                                                             | 2.2   | 1.7   |
|                 |              |                      | Complex with TF (Tig) | 74.4                                                | 62.8  | 48.5  | 3.3                                                             | 2.8   | 2.2   |
| P0A742          | MscL         | Cell inner membrane  | Monomer               | 147.3                                               | 124.5 | 96.1  | 16.8                                                            | 14.2  | 11.0  |
|                 |              |                      | Complex with SecB     | 74.9                                                | 61.2  | 48.9  | 3.4                                                             | 2.8   | 2.2   |
|                 |              |                      | Complex with TF (Tig) | 83.8                                                | 70.8  | 54.7  | 4.5                                                             | 3.8   | 3.0   |
| P0AAT4          | MscM         | Cell inner membrane  | Monomer               | 94.4                                                | 79.7  | 61.6  | 6.1                                                             | 5.1   | 4.0   |
|                 |              |                      | Complex with SecB     | 66.1                                                | 54.0  | 43.1  | 2.4                                                             | 2.0   | 1.6   |
|                 |              |                      | Complex with TF (Tig) | 71.4                                                | 60.4  | 46.6  | 3.0                                                             | 2.5   | 2.0   |
| P0C0S1          | MscS         | Cell inner membrane  | Monomer               | 110.9                                               | 93.7  | 72.3  | 8.9                                                             | 7.5   | 5.8   |
|                 |              |                      | Complex with SecB     | 70.0                                                | 57.1  | 45.7  | 2.8                                                             | 2.3   | 1.9   |
|                 |              |                      | Complex with TF (Tig) | 76.7                                                | 64.8  | 50.0  | 3.6                                                             | 3.1   | 2.4   |
| P0A744          | MsrA         |                      | Monomer               | 123.8                                               | 104.6 | 80.8  | 11.5                                                            | 9.7   | 7.5   |
| P0A746          | MsrB         |                      | Monomer               | 145.5                                               | 122.9 | 94.9  | 16.4                                                            | 13.8  | 10.7  |
| P25738          | MsyB         |                      | Monomer               | 150.1                                               | 126.8 | 98.0  | 17.5                                                            | 14.8  | 11.4  |
| P76346          | MtfA         | Cytoplasm            | Monomer               | 111.7                                               | 94.4  | 72.9  | 9.1                                                             | 7.7   | 5.9   |
| P46022          | MtgA         | Cell membrane        | Monomer               | 116.3                                               | 98.3  | 75.9  | 10.0                                                            | 8.4   | 6.5   |
|                 |              |                      | Complex with SecB     | 71.0                                                | 58.0  | 46.3  | 3.0                                                             | 2.4   | 1.9   |

| UniProtKB A. N. | Protein name | Subcellular location | Subunit               | $D_0 \left( \frac{\mu\text{m}^2}{\text{s}} \right)$ |       |       | $D_{\text{cyto}} \left( \frac{\mu\text{m}^2}{\text{s}} \right)$ |       |       |
|-----------------|--------------|----------------------|-----------------------|-----------------------------------------------------|-------|-------|-----------------------------------------------------------------|-------|-------|
|                 |              |                      |                       | 310 K                                               | 303 K | 293 K | 310 K                                                           | 303 K | 293 K |
|                 |              |                      | Complex with TF (Tig) | 78.1                                                | 66.0  | 51.0  | 3.8                                                             | 3.2   | 2.5   |
|                 |              |                      | Monomer               | 81.4                                                | 68.8  | 53.1  | 4.2                                                             | 3.6   | 2.8   |
| P00550          | MtlA         | Cell inner membrane  | Complex with SecB     | 61.8                                                | 50.5  | 40.3  | 2.0                                                             | 1.7   | 1.3   |
|                 |              |                      | Complex with TF (Tig) | 66.0                                                | 55.7  | 43.0  | 2.4                                                             | 2.1   | 1.6   |
| P09424          | MtlD         |                      | Monomer               | 99.1                                                | 83.7  | 64.7  | 6.9                                                             | 5.8   | 4.5   |
| P0AF10          | MtlR         |                      | Monomer               | 126.7                                               | 107.0 | 82.7  | 12.1                                                            | 10.2  | 7.9   |
|                 |              |                      | Monomer               | 121.7                                               | 102.8 | 79.4  | 11.1                                                            | 9.3   | 7.2   |
| P0AF12          | MtnN         |                      | Homodimer             | 92.7                                                | 75.8  | 60.5  | 5.8                                                             | 4.8   | 3.8   |
|                 |              |                      | Monomer               | 96.2                                                | 81.3  | 62.8  | 6.4                                                             | 5.4   | 4.2   |
| P0AAD2          | Mtr          | Cell inner membrane  | Complex with SecB     | 66.6                                                | 54.4  | 43.4  | 2.5                                                             | 2.0   | 1.6   |
|                 |              |                      | Complex with TF (Tig) | 72.1                                                | 60.9  | 47.1  | 3.1                                                             | 2.6   | 2.0   |
| P0A9H1          | Mug          | Cytoplasm            | Monomer               | 135.1                                               | 114.1 | 88.1  | 13.9                                                            | 11.8  | 9.1   |
|                 |              |                      | Monomer               | 56.8                                                | 48.0  | 37.1  | 1.6                                                             | 1.4   | 1.0   |
| P22523          | MukB         | Cytoplasm > nucleoid | Homodimer             | 43.3                                                | 35.4  | 28.2  | 0.7                                                             | 0.6   | 0.5   |
|                 |              | Cytoplasm > nucleoid | Monomer               | 116.9                                               | 98.8  | 76.3  | 10.1                                                            | 8.5   | 6.6   |
|                 |              | Cytoplasm > nucleoid | Monomer               | 91.4                                                | 77.2  | 59.6  | 5.6                                                             | 4.8   | 3.7   |
| P60293          | MukF         |                      | Monomer               | 91.4                                                | 77.2  | 59.6  | 5.6                                                             | 4.8   | 3.7   |
| P0A749          | MurA         | Cytoplasm            | Monomer               | 95.8                                                | 81.0  | 62.5  | 6.3                                                             | 5.3   | 4.1   |
| P08373          | MurB         | Cytoplasm            | Monomer               | 102.4                                               | 86.5  | 66.8  | 7.4                                                             | 6.3   | 4.8   |
| P17952          | MurC         | Cytoplasm            | Monomer               | 89.3                                                | 75.5  | 58.3  | 5.3                                                             | 4.5   | 3.5   |
| P14900          | MurD         | Cytoplasm            | Monomer               | 94.1                                                | 79.5  | 61.4  | 6.0                                                             | 5.1   | 3.9   |
| P22188          | MurE         | Cytoplasm            | Monomer               | 89.5                                                | 75.6  | 58.4  | 5.4                                                             | 4.5   | 3.5   |
| P11880          | MurF         | Cytoplasm            | Monomer               | 93.7                                                | 79.2  | 61.1  | 6.0                                                             | 5.1   | 3.9   |
|                 |              |                      | Monomer               | 102.4                                               | 86.5  | 66.8  | 7.4                                                             | 6.3   | 4.8   |
| P17443          | MurG         | Cell inner membrane  | Complex with SecB     | 68.1                                                | 55.7  | 44.5  | 2.7                                                             | 2.2   | 1.7   |
|                 |              |                      | Complex with TF (Tig) | 74.2                                                | 62.7  | 48.4  | 3.3                                                             | 2.8   | 2.2   |
| P22634          | MurI         |                      | Monomer               | 110.7                                               | 93.5  | 72.2  | 8.9                                                             | 7.5   | 5.8   |
|                 |              |                      | Monomer               | 91.9                                                | 77.7  | 60.0  | 5.7                                                             | 4.8   | 3.7   |
| P77272          | MurP         | Cell inner membrane  | Complex with SecB     | 65.4                                                | 53.4  | 42.7  | 2.4                                                             | 1.9   | 1.5   |
|                 |              |                      | Complex with TF (Tig) | 70.5                                                | 59.6  | 46.0  | 2.9                                                             | 2.5   | 1.9   |

| UniProtKB A. N. | Protein name | Subcellular location | Subunit               | $D_0 \left( \frac{\mu\text{m}^2}{\text{s}} \right)$ |       |       | $D_{\text{cyto}} \left( \frac{\mu\text{m}^2}{\text{s}} \right)$ |       |       |
|-----------------|--------------|----------------------|-----------------------|-----------------------------------------------------|-------|-------|-----------------------------------------------------------------|-------|-------|
|                 |              |                      |                       | 310 K                                               | 303 K | 293 K | 310 K                                                           | 303 K | 293 K |
| P76535          | MurQ         |                      | Monomer               | 110.4                                               | 93.3  | 72.0  | 8.8                                                             | 7.5   | 5.8   |
|                 |              |                      | Homodimer             | 84.1                                                | 68.7  | 54.9  | 4.6                                                             | 3.8   | 3.0   |
| P77245          | MurR         |                      | Monomer               | 110.5                                               | 93.3  | 72.1  | 8.9                                                             | 7.5   | 5.8   |
|                 |              |                      | Homotetramer          | 64.1                                                | 52.4  | 41.9  | 2.3                                                             | 1.8   | 1.5   |
| P06722          | MutH         | Cytoplasm            | Monomer               | 119.5                                               | 100.9 | 78.0  | 10.6                                                            | 9.0   | 6.9   |
| P23367          | MutL         |                      | Monomer               | 81.4                                                | 68.8  | 53.1  | 4.2                                                             | 3.6   | 2.8   |
| P05523          | MutM         |                      | Monomer               | 111.7                                               | 94.4  | 72.9  | 9.1                                                             | 7.7   | 5.9   |
| P23909          | MutS         |                      | Monomer               | 71.3                                                | 60.2  | 46.5  | 3.0                                                             | 2.5   | 2.0   |
| P08337          | MutT         |                      | Monomer               | 147.4                                               | 124.6 | 96.2  | 16.8                                                            | 14.2  | 11.0  |
| P17802          | MutY         |                      | Monomer               | 101.0                                               | 85.4  | 65.9  | 7.2                                                             | 6.1   | 4.7   |
| P75931          | MviM         |                      | Monomer               | 107.2                                               | 90.5  | 69.9  | 8.3                                                             | 7.0   | 5.4   |
| P0AF16          | MviN         | Cell inner membrane  | Monomer               | 88.3                                                | 74.6  | 57.6  | 5.2                                                             | 4.4   | 3.4   |
|                 |              |                      | Complex with SecB     | 64.2                                                | 52.5  | 41.9  | 2.3                                                             | 1.8   | 1.5   |
|                 |              |                      | Complex with TF (Tig) | 69.0                                                | 58.3  | 45.0  | 2.7                                                             | 2.3   | 1.8   |
| Q47005          | Nac          |                      | Monomer               | 108.3                                               | 91.5  | 70.6  | 8.4                                                             | 7.1   | 5.5   |
| P11458          | NadA         | Cytoplasm            | Monomer               | 102.0                                               | 86.1  | 66.5  | 7.3                                                             | 6.2   | 4.8   |
|                 |              |                      | Homodimer             | 77.7                                                | 63.5  | 50.7  | 3.8                                                             | 3.1   | 2.4   |
| P10902          | NadB         | Cytoplasm            | Monomer               | 85.3                                                | 72.0  | 55.6  | 4.7                                                             | 4.0   | 3.1   |
| P30011          | NadC         |                      | Monomer               | 108.3                                               | 91.5  | 70.7  | 8.5                                                             | 7.2   | 5.5   |
|                 |              |                      | Homodimer             | 82.6                                                | 67.5  | 53.9  | 4.4                                                             | 3.6   | 2.9   |
| P0A752          | NadD         |                      | Monomer               | 121.4                                               | 102.5 | 79.2  | 11.0                                                            | 9.3   | 7.2   |
| P18843          | NadE         |                      | Monomer               | 111.2                                               | 94.0  | 72.6  | 9.0                                                             | 7.6   | 5.9   |
|                 |              |                      | Homodimer             | 84.8                                                | 69.2  | 55.3  | 4.7                                                             | 3.8   | 3.1   |
| P27278          | NadR         | Cell membrane        | Monomer               | 93.8                                                | 79.2  | 61.2  | 6.0                                                             | 5.1   | 3.9   |
|                 |              |                      | Homotetramer          | 54.5                                                | 44.5  | 35.5  | 1.4                                                             | 1.2   | 0.9   |
| P0AF18          | NagA         |                      | Monomer               | 99.3                                                | 83.9  | 64.8  | 6.9                                                             | 5.8   | 4.5   |
| P0A759          | NagB         |                      | Monomer               | 112.5                                               | 95.0  | 73.4  | 9.2                                                             | 7.8   | 6.0   |
|                 |              |                      | Homotrimer            | 73.1                                                | 59.7  | 47.7  | 3.2                                                             | 2.6   | 2.1   |
|                 |              |                      | Homohexamer           | 55.7                                                | 47.1  | 36.4  | 1.5                                                             | 1.3   | 1.0   |
| P0AF20          | NagC         |                      | Monomer               | 96.1                                                | 81.1  | 62.7  | 6.4                                                             | 5.4   | 4.2   |
| P0AF24          | NagD         |                      | Monomer               | 116.6                                               | 98.5  | 76.1  | 10.0                                                            | 8.5   | 6.5   |

| UniProtKB A. N. | Protein name | Subcellular location | Subunit               | $D_0 \left( \frac{\mu\text{m}^2}{\text{s}} \right)$ |       |       | $D_{\text{cyto}} \left( \frac{\mu\text{m}^2}{\text{s}} \right)$ |       |       |
|-----------------|--------------|----------------------|-----------------------|-----------------------------------------------------|-------|-------|-----------------------------------------------------------------|-------|-------|
|                 |              |                      |                       | 310 K                                               | 303 K | 293 K | 310 K                                                           | 303 K | 293 K |
| P09323          | NagE         | Cell inner membrane  | Monomer               | 81.2                                                | 68.6  | 53.0  | 4.2                                                             | 3.5   | 2.7   |
|                 |              |                      | Complex with SecB     | 61.8                                                | 50.4  | 40.3  | 2.0                                                             | 1.7   | 1.3   |
|                 |              |                      | Complex with TF (Tig) | 65.9                                                | 55.7  | 43.0  | 2.4                                                             | 2.0   | 1.6   |
| P75959          | NagK         |                      | Monomer               | 108.0                                               | 91.2  | 70.5  | 8.4                                                             | 7.1   | 5.5   |
| P75949          | NagZ         | Cytoplasm            | Monomer               | 102.7                                               | 86.7  | 67.0  | 7.5                                                             | 6.3   | 4.9   |
| P0A6L4          | NanA         | Cytoplasm            | Monomer               | 108.6                                               | 91.7  | 70.8  | 8.5                                                             | 7.2   | 5.6   |
|                 |              |                      | Homotetramer          | 63.0                                                | 51.5  | 41.1  | 2.2                                                             | 1.8   | 1.4   |
| P69856          | NanC         | Cell outer membrane  | Monomer               | 115.4                                               | 97.5  | 75.3  | 9.8                                                             | 8.3   | 6.4   |
|                 |              |                      | Complex with SecB     | 70.8                                                | 57.8  | 46.2  | 2.9                                                             | 2.4   | 1.9   |
|                 |              |                      | Complex with TF (Tig) | 77.9                                                | 65.8  | 50.8  | 3.8                                                             | 3.2   | 2.5   |
| P0A761          | NanE         |                      | Monomer               | 122.3                                               | 103.3 | 79.8  | 11.2                                                            | 9.4   | 7.3   |
| P45425          | NanK         |                      | Monomer               | 112.7                                               | 95.2  | 73.5  | 9.3                                                             | 7.8   | 6.1   |
|                 |              |                      | Homodimer             | 85.9                                                | 70.1  | 56.0  | 4.8                                                             | 3.9   | 3.2   |
| P39371          | NanM         | Periplasm            | Monomer               | 100.6                                               | 85.0  | 65.7  | 7.1                                                             | 6.0   | 4.6   |
|                 |              |                      | Complex with SecB     | 67.7                                                | 55.3  | 44.2  | 2.6                                                             | 2.1   | 1.7   |
|                 |              |                      | Complex with TF (Tig) | 73.6                                                | 62.2  | 48.0  | 3.3                                                             | 2.8   | 2.1   |
| P0A8W0          | NanR         |                      | Monomer               | 112.9                                               | 95.3  | 73.6  | 9.3                                                             | 7.9   | 6.1   |
| P39370          | NanS         | Periplasm            | Monomer               | 103.4                                               | 87.4  | 67.5  | 7.6                                                             | 6.4   | 5.0   |
|                 |              |                      | Complex with SecB     | 68.4                                                | 55.9  | 44.6  | 2.7                                                             | 2.2   | 1.7   |
|                 |              |                      | Complex with TF (Tig) | 74.5                                                | 63.0  | 48.6  | 3.4                                                             | 2.8   | 2.2   |
| P41036          | NanT         | Cell inner membrane  | Monomer               | 89.4                                                | 75.5  | 58.3  | 5.3                                                             | 4.5   | 3.5   |
|                 |              |                      | Complex with SecB     | 64.6                                                | 52.8  | 42.1  | 2.3                                                             | 1.9   | 1.5   |
|                 |              |                      | Complex with TF (Tig) | 69.5                                                | 58.7  | 45.3  | 2.8                                                             | 2.4   | 1.8   |
| P33937          | NapA         | Periplasm            | Monomer               | 72.0                                                | 60.8  | 47.0  | 3.1                                                             | 2.6   | 2.0   |
|                 |              |                      | Complex with SecB     | 57.9                                                | 47.3  | 37.8  | 1.7                                                             | 1.4   | 1.1   |
|                 |              |                      | Complex with TF (Tig) | 61.1                                                | 51.6  | 39.9  | 2.0                                                             | 1.7   | 1.3   |
| P0ABL3          | NapB         | Periplasm            | Monomer               | 142.5                                               | 120.4 | 93.0  | 15.6                                                            | 13.2  | 10.2  |
|                 |              |                      | Complex with SecB     | 74.4                                                | 60.8  | 48.6  | 3.4                                                             | 2.7   | 2.2   |
|                 |              |                      | Complex with TF (Tig) | 83.1                                                | 70.2  | 54.2  | 4.4                                                             | 3.8   | 2.9   |
| P0ABL5          | NapC         | Cell inner membrane  | Monomer               | 124.2                                               | 105.0 | 81.1  | 11.6                                                            | 9.8   | 7.6   |
|                 |              |                      | Complex with SecB     | 72.2                                                | 59.0  | 47.1  | 3.1                                                             | 2.5   | 2.0   |

| UniProtKB A. N. | Protein name | Subcellular location | Subunit               | $D_0 \left( \frac{\mu\text{m}^2}{\text{s}} \right)$ |       |       | $D_{\text{cyto}} \left( \frac{\mu\text{m}^2}{\text{s}} \right)$ |       |       |
|-----------------|--------------|----------------------|-----------------------|-----------------------------------------------------|-------|-------|-----------------------------------------------------------------|-------|-------|
|                 |              |                      |                       | 310 K                                               | 303 K | 293 K | 310 K                                                           | 303 K | 293 K |
|                 |              |                      | Complex with TF (Tig) | 79.9                                                | 67.5  | 52.1  | 4.0                                                             | 3.4   | 2.6   |
| P0A9I5          | NapD         | Cytoplasm            | Monomer               | 176.2                                               | 148.9 | 115.0 | 24.4                                                            | 20.6  | 15.9  |
| P0AAL0          | NapF         |                      | Monomer               | 136.9                                               | 115.6 | 89.3  | 14.3                                                            | 12.1  | 9.4   |
| P0AAL3          | NapG         |                      | Monomer               | 120.6                                               | 101.9 | 78.7  | 10.8                                                            | 9.1   | 7.1   |
|                 |              |                      | Monomer               | 109.5                                               | 92.5  | 71.5  | 8.7                                                             | 7.3   | 5.7   |
| P33934          | NapH         | Cell inner membrane  | Complex with SecB     | 69.7                                                | 56.9  | 45.5  | 2.8                                                             | 2.3   | 1.8   |
|                 |              |                      | Complex with TF (Tig) | 76.3                                                | 64.5  | 49.8  | 3.6                                                             | 3.0   | 2.3   |
|                 |              |                      | Monomer               | 61.2                                                | 51.7  | 40.0  | 2.0                                                             | 1.7   | 1.3   |
| P09152          | NarG         | Cell membrane        | Complex with SecB     | 52.3                                                | 42.8  | 34.2  | 1.3                                                             | 1.0   | 0.8   |
|                 |              |                      | Complex with TF (Tig) | 54.5                                                | 46.1  | 35.6  | 1.4                                                             | 1.2   | 0.9   |
|                 |              |                      | Monomer               | 86.6                                                | 73.1  | 56.5  | 4.9                                                             | 4.2   | 3.2   |
| P11349          | NarH         | Cell membrane        | Complex with SecB     | 63.7                                                | 52.0  | 41.5  | 2.2                                                             | 1.8   | 1.4   |
|                 |              |                      | Complex with TF (Tig) | 68.3                                                | 57.7  | 44.6  | 2.7                                                             | 2.3   | 1.7   |
|                 |              |                      | Monomer               | 119.5                                               | 101.0 | 78.0  | 10.6                                                            | 9.0   | 6.9   |
| P11350          | NarI         | Cell inner membrane  | Complex with SecB     | 71.5                                                | 58.4  | 46.7  | 3.0                                                             | 2.5   | 2.0   |
|                 |              |                      | Complex with TF (Tig) | 78.9                                                | 66.6  | 51.5  | 3.9                                                             | 3.3   | 2.5   |
| P0AF26          | NarJ         | Cytoplasm            | Monomer               | 117.8                                               | 99.5  | 76.9  | 10.3                                                            | 8.7   | 6.7   |
|                 |              |                      | Monomer               | 92.0                                                | 77.7  | 60.0  | 5.7                                                             | 4.8   | 3.7   |
| P10903          | NarK         | Cell inner membrane  | Complex with SecB     | 65.4                                                | 53.4  | 42.7  | 2.4                                                             | 1.9   | 1.6   |
|                 |              |                      | Complex with TF (Tig) | 70.5                                                | 59.6  | 46.0  | 2.9                                                             | 2.5   | 1.9   |
| P0AF28          | NarL         |                      | Monomer               | 122.5                                               | 103.5 | 80.0  | 11.2                                                            | 9.5   | 7.3   |
| P31802          | NarP         |                      | Monomer               | 123.3                                               | 104.1 | 80.4  | 11.4                                                            | 9.6   | 7.4   |
|                 |              |                      | Monomer               | 83.5                                                | 70.5  | 54.5  | 4.5                                                             | 3.8   | 2.9   |
| P27896          | NarQ         | Cell inner membrane  | Complex with SecB     | 62.6                                                | 51.1  | 40.8  | 2.1                                                             | 1.7   | 1.4   |
|                 |              |                      | Complex with TF (Tig) | 66.9                                                | 56.6  | 43.7  | 2.5                                                             | 2.1   | 1.7   |
|                 |              |                      | Monomer               | 91.9                                                | 77.6  | 60.0  | 5.7                                                             | 4.8   | 3.7   |
| P37758          | NarU         | Cell inner membrane  | Complex with SecB     | 65.3                                                | 53.4  | 42.6  | 2.4                                                             | 1.9   | 1.5   |
|                 |              |                      | Complex with TF (Tig) | 70.5                                                | 59.6  | 46.0  | 2.9                                                             | 2.5   | 1.9   |
|                 |              |                      | Monomer               | 118.6                                               | 100.2 | 77.4  | 10.4                                                            | 8.8   | 6.8   |
| P0AF32          | NarV         | Cell inner membrane  | Complex with SecB     | 71.3                                                | 58.3  | 46.6  | 3.0                                                             | 2.5   | 2.0   |
|                 |              |                      | Complex with TF (Tig) | 78.6                                                | 66.4  | 51.3  | 3.9                                                             | 3.3   | 2.5   |

| UniProtKB A. N. | Protein name | Subcellular location | Subunit               | $D_0 \left( \frac{\mu\text{m}^2}{\text{s}} \right)$ |       |       | $D_{\text{cyto}} \left( \frac{\mu\text{m}^2}{\text{s}} \right)$ |       |       |
|-----------------|--------------|----------------------|-----------------------|-----------------------------------------------------|-------|-------|-----------------------------------------------------------------|-------|-------|
|                 |              |                      |                       | 310 K                                               | 303 K | 293 K | 310 K                                                           | 303 K | 293 K |
| P19317          | NarW         | Cytoplasm            | Monomer               | 118.3                                               | 100.0 | 77.2  | 10.4                                                            | 8.8   | 6.8   |
|                 |              |                      | Monomer               | 81.8                                                | 69.1  | 53.4  | 4.3                                                             | 3.6   | 2.8   |
| P0AFA2          | NarX         | Cell inner membrane  | Complex with SecB     | 62.0                                                | 50.6  | 40.4  | 2.1                                                             | 1.7   | 1.3   |
|                 |              |                      | Complex with TF (Tig) | 66.2                                                | 55.9  | 43.2  | 2.5                                                             | 2.1   | 1.6   |
|                 |              |                      | Monomer               | 86.3                                                | 72.9  | 56.3  | 4.9                                                             | 4.1   | 3.2   |
| P19318          | NarY         | Cell membrane        | Complex with SecB     | 63.6                                                | 51.9  | 41.5  | 2.2                                                             | 1.8   | 1.4   |
|                 |              |                      | Complex with TF (Tig) | 68.2                                                | 57.6  | 44.5  | 2.7                                                             | 2.2   | 1.7   |
|                 |              |                      | Monomer               | 61.3                                                | 51.8  | 40.0  | 2.0                                                             | 1.7   | 1.3   |
| P19319          | NarZ         | Cell membrane        | Complex with SecB     | 52.4                                                | 42.8  | 34.2  | 1.3                                                             | 1.0   | 0.8   |
|                 |              |                      | Complex with TF (Tig) | 54.6                                                | 46.1  | 35.6  | 1.4                                                             | 1.2   | 0.9   |
|                 |              |                      | Monomer               | 93.8                                                | 79.2  | 61.2  | 6.0                                                             | 5.1   | 3.9   |
| P00393          | Ndh          | Cell membrane        | Complex with SecB     | 65.9                                                | 53.8  | 43.0  | 2.4                                                             | 2.0   | 1.6   |
|                 |              |                      | Complex with TF (Tig) | 71.2                                                | 60.2  | 46.5  | 3.0                                                             | 2.5   | 1.9   |
|                 |              |                      | Monomer               | 145.4                                               | 122.9 | 94.9  | 16.3                                                            | 13.8  | 10.7  |
| P0A763          | Ndk          | Cytoplasm            | Homotetramer          | 84.5                                                | 69.0  | 55.1  | 4.6                                                             | 3.8   | 3.0   |
| P50465          | Nei          |                      | Monomer               | 112.4                                               | 94.9  | 73.3  | 9.2                                                             | 7.8   | 6.0   |
| P77258          | NemA         |                      | Monomer               | 100.7                                               | 85.0  | 65.7  | 7.1                                                             | 6.0   | 4.6   |
| P67430          | NemR         |                      | Monomer               | 126.0                                               | 106.5 | 82.2  | 12.0                                                            | 10.1  | 7.8   |
| P0ADL1          | NepI         | Cell inner membrane  | Monomer               | 98.4                                                | 83.2  | 64.2  | 6.7                                                             | 5.7   | 4.4   |
|                 |              |                      | Complex with SecB     | 67.2                                                | 54.9  | 43.8  | 2.6                                                             | 2.1   | 1.7   |
|                 |              |                      | Complex with TF (Tig) | 72.9                                                | 61.6  | 47.6  | 3.2                                                             | 2.7   | 2.1   |
| P68739          | Nfi          | Cytoplasm            | Monomer               | 121.1                                               | 102.3 | 79.0  | 10.9                                                            | 9.2   | 7.1   |
| P38489          | NfnB         |                      | Monomer               | 122.6                                               | 103.6 | 80.0  | 11.2                                                            | 9.5   | 7.3   |
|                 |              |                      | Homodimer             | 93.4                                                | 76.3  | 61.0  | 5.9                                                             | 4.9   | 3.9   |
| P0A6C1          | Nfo          |                      | Monomer               | 110.1                                               | 93.0  | 71.8  | 8.8                                                             | 7.4   | 5.7   |
| P31600          | NfrA         | Cell outer membrane  | Monomer               | 67.1                                                | 56.7  | 43.8  | 2.5                                                             | 2.2   | 1.7   |
|                 |              |                      | Complex with SecB     | 55.5                                                | 45.3  | 36.2  | 1.5                                                             | 1.2   | 1.0   |
|                 |              |                      | Complex with TF (Tig) | 58.3                                                | 49.2  | 38.0  | 1.7                                                             | 1.5   | 1.1   |
| P0AFA5          | NfrB         | Cell inner membrane  | Monomer               | 74.4                                                | 62.9  | 48.6  | 3.4                                                             | 2.8   | 2.2   |
|                 |              |                      | Complex with SecB     | 59.0                                                | 48.2  | 38.5  | 1.8                                                             | 1.5   | 1.2   |
|                 |              |                      | Complex with TF (Tig) | 62.5                                                | 52.8  | 40.8  | 2.1                                                             | 1.8   | 1.4   |



| UniProtKB A. N. | Protein name | Subcellular location | Subunit               | $D_0 \left( \frac{\mu\text{m}^2}{\text{s}} \right)$ |       |       | $D_{\text{cyto}} \left( \frac{\mu\text{m}^2}{\text{s}} \right)$ |       |       |
|-----------------|--------------|----------------------|-----------------------|-----------------------------------------------------|-------|-------|-----------------------------------------------------------------|-------|-------|
|                 |              |                      |                       | 310 K                                               | 303 K | 293 K | 310 K                                                           | 303 K | 293 K |
| P17117          | NfsA         |                      | Monomer               | 117.2                                               | 99.0  | 76.5  | 10.2                                                            | 8.6   | 6.6   |
| P63020          | NfuA         |                      | Monomer               | 129.0                                               | 109.0 | 84.2  | 12.6                                                            | 10.6  | 8.2   |
|                 |              |                      | Homodimer             | 98.3                                                | 80.3  | 64.1  | 6.7                                                             | 5.5   | 4.4   |
| P13738          | NhaA         | Cell inner membrane  | Monomer               | 98.9                                                | 83.5  | 64.5  | 6.8                                                             | 5.8   | 4.5   |
|                 |              |                      | Complex with SecB     | 67.3                                                | 55.0  | 43.9  | 2.6                                                             | 2.1   | 1.7   |
|                 |              |                      | Complex with TF (Tig) | 73.1                                                | 61.7  | 47.7  | 3.2                                                             | 2.7   | 2.1   |
| P0AFA7          | NhaB         | Cell inner membrane  | Monomer               | 87.4                                                | 73.8  | 57.0  | 5.0                                                             | 4.3   | 3.3   |
|                 |              |                      | Complex with SecB     | 63.9                                                | 52.2  | 41.7  | 2.2                                                             | 1.8   | 1.5   |
|                 |              |                      | Complex with TF (Tig) | 68.7                                                | 58.0  | 44.8  | 2.7                                                             | 2.3   | 1.8   |
| P0A9G2          | NhaR         | Cytoplasm            | Monomer               | 106.4                                               | 89.9  | 69.5  | 8.1                                                             | 6.9   | 5.3   |
| P77567          | NhoA         |                      | Monomer               | 109.0                                               | 92.1  | 71.1  | 8.6                                                             | 7.3   | 5.6   |
| P0ACD4          | NifU         |                      | Monomer               | 151.8                                               | 128.3 | 99.1  | 17.9                                                            | 15.1  | 11.7  |
| P33590          | Nika         | Periplasm            | Monomer               | 86.2                                                | 72.8  | 56.2  | 4.9                                                             | 4.1   | 3.2   |
|                 |              |                      | Complex with SecB     | 63.5                                                | 51.9  | 41.5  | 2.2                                                             | 1.8   | 1.4   |
|                 |              |                      | Complex with TF (Tig) | 68.1                                                | 57.6  | 44.5  | 2.7                                                             | 2.2   | 1.7   |
| P33591          | NikB         | Cell inner membrane  | Monomer               | 105.3                                               | 88.9  | 68.7  | 7.9                                                             | 6.7   | 5.2   |
|                 |              |                      | Complex with SecB     | 68.8                                                | 56.2  | 44.9  | 2.7                                                             | 2.2   | 1.8   |
|                 |              |                      | Complex with TF (Tig) | 75.1                                                | 63.4  | 49.0  | 3.4                                                             | 2.9   | 2.2   |
| P0AFA9          | NikC         | Cell inner membrane  | Monomer               | 111.6                                               | 94.3  | 72.8  | 9.1                                                             | 7.7   | 5.9   |
|                 |              |                      | Complex with SecB     | 70.1                                                | 57.3  | 45.7  | 2.9                                                             | 2.3   | 1.9   |
|                 |              |                      | Complex with TF (Tig) | 76.9                                                | 65.0  | 50.2  | 3.7                                                             | 3.1   | 2.4   |
| P33593          | NikD         | Cell inner membrane  | Monomer               | 117.2                                               | 99.0  | 76.5  | 10.1                                                            | 8.6   | 6.6   |
|                 |              |                      | Complex with SecB     | 71.1                                                | 58.1  | 46.4  | 3.0                                                             | 2.4   | 1.9   |
|                 |              |                      | Complex with TF (Tig) | 78.3                                                | 66.2  | 51.1  | 3.8                                                             | 3.2   | 2.5   |
| P33594          | NikE         | Cell inner membrane  | Monomer               | 112.6                                               | 95.1  | 73.5  | 9.3                                                             | 7.8   | 6.0   |
|                 |              |                      | Complex with SecB     | 70.3                                                | 57.4  | 45.9  | 2.9                                                             | 2.4   | 1.9   |
|                 |              |                      | Complex with TF (Tig) | 77.1                                                | 65.2  | 50.3  | 3.7                                                             | 3.1   | 2.4   |
| P0A6Z6          | NikR         |                      | Monomer               | 146.8                                               | 124.0 | 95.8  | 16.7                                                            | 14.1  | 10.9  |
|                 |              |                      | Homotetramer          | 85.3                                                | 69.6  | 55.6  | 4.7                                                             | 3.9   | 3.1   |
| Q47270          | NinE         |                      | Monomer               | 204.3                                               | 172.6 | 133.3 | 32.8                                                            | 27.7  | 21.4  |
| P08201          | NirB         |                      | Monomer               | 71.9                                                | 60.8  | 46.9  | 3.1                                                             | 2.6   | 2.0   |

| UniProtKB A. N. | Protein name | Subcellular location | Subunit               | $D_0 \left( \frac{\mu\text{m}^2}{\text{s}} \right)$ |       |       | $D_{\text{cyto}} \left( \frac{\mu\text{m}^2}{\text{s}} \right)$ |       |       |
|-----------------|--------------|----------------------|-----------------------|-----------------------------------------------------|-------|-------|-----------------------------------------------------------------|-------|-------|
|                 |              |                      |                       | 310 K                                               | 303 K | 293 K | 310 K                                                           | 303 K | 293 K |
|                 |              |                      | Homodimer             | 54.8                                                | 44.8  | 35.8  | 1.5                                                             | 1.2   | 0.9   |
| P0AC26          | NirC         | Cell inner membrane  | Monomer               | 114.3                                               | 96.6  | 74.6  | 9.6                                                             | 8.1   | 6.3   |
|                 |              |                      | Complex with SecB     | 70.6                                                | 57.7  | 46.1  | 2.9                                                             | 2.4   | 1.9   |
|                 |              |                      | Complex with TF (Tig) | 77.6                                                | 65.6  | 50.6  | 3.7                                                             | 3.2   | 2.4   |
|                 |              |                      |                       |                                                     |       |       |                                                                 |       |       |
| P0A9I8          | NirD         | Cytoplasm            | Monomer               | 159.2                                               | 134.5 | 103.9 | 19.8                                                            | 16.7  | 12.9  |
| P04846          | NlpA         | Cell inner membrane  | Monomer               | 113.0                                               | 95.5  | 73.7  | 9.3                                                             | 7.9   | 6.1   |
|                 |              |                      | Complex with SecB     | 70.4                                                | 57.5  | 45.9  | 2.9                                                             | 2.4   | 1.9   |
|                 |              |                      | Complex with TF (Tig) | 77.3                                                | 65.3  | 50.4  | 3.7                                                             | 3.1   | 2.4   |
|                 |              |                      |                       |                                                     |       |       |                                                                 |       |       |
| P0A903          | NlpB         | Cell outer membrane  | Monomer               | 103.5                                               | 87.4  | 67.5  | 7.6                                                             | 6.4   | 5.0   |
|                 |              |                      | Complex with SecB     | 68.4                                                | 55.9  | 44.6  | 2.7                                                             | 2.2   | 1.7   |
|                 |              |                      | Complex with TF (Tig) | 74.5                                                | 63.0  | 48.6  | 3.4                                                             | 2.8   | 2.2   |
|                 |              |                      |                       |                                                     |       |       |                                                                 |       |       |
| P23898          | NlpC         | Cell membrane        | Monomer               | 139.2                                               | 117.6 | 90.8  | 14.9                                                            | 12.6  | 9.7   |
|                 |              |                      | Complex with SecB     | 74.1                                                | 60.5  | 48.3  | 3.3                                                             | 2.7   | 2.2   |
|                 |              |                      | Complex with TF (Tig) | 82.6                                                | 69.8  | 53.9  | 4.4                                                             | 3.7   | 2.9   |
|                 |              |                      |                       |                                                     |       |       |                                                                 |       |       |
| P0ADA3          | NlpD         | Cell inner membrane  | Monomer               | 100.0                                               | 84.5  | 65.3  | 7.0                                                             | 5.9   | 4.6   |
|                 |              |                      | Complex with SecB     | 67.6                                                | 55.2  | 44.1  | 2.6                                                             | 2.1   | 1.7   |
|                 |              |                      | Complex with TF (Tig) | 73.4                                                | 62.0  | 47.9  | 3.2                                                             | 2.7   | 2.1   |
|                 |              |                      |                       |                                                     |       |       |                                                                 |       |       |
| P40710          | NlpE         | Cell outer membrane  | Monomer               | 118.9                                               | 100.4 | 77.6  | 10.5                                                            | 8.9   | 6.8   |
|                 |              |                      | Complex with SecB     | 71.4                                                | 58.3  | 46.6  | 3.0                                                             | 2.5   | 2.0   |
|                 |              |                      | Complex with TF (Tig) | 78.7                                                | 66.5  | 51.4  | 3.9                                                             | 3.3   | 2.5   |
|                 |              |                      |                       |                                                     |       |       |                                                                 |       |       |
| P0AFB1          | NlpI         | Cell membrane        | Monomer               | 107.3                                               | 90.6  | 70.0  | 8.3                                                             | 7.0   | 5.4   |
|                 |              |                      | Complex with SecB     | 69.2                                                | 56.6  | 45.2  | 2.8                                                             | 2.3   | 1.8   |
|                 |              |                      | Complex with TF (Tig) | 75.7                                                | 63.9  | 49.4  | 3.5                                                             | 3.0   | 2.3   |
|                 |              |                      |                       |                                                     |       |       |                                                                 |       |       |
| P21420          | NmpC         | Cell outer membrane  | Monomer               | 99.9                                                | 84.4  | 65.2  | 7.0                                                             | 5.9   | 4.6   |
|                 |              |                      | Complex with SecB     | 67.5                                                | 55.2  | 44.1  | 2.6                                                             | 2.1   | 1.7   |
|                 |              |                      | Complex with TF (Tig) | 73.4                                                | 62.0  | 47.9  | 3.2                                                             | 2.7   | 2.1   |
|                 |              |                      |                       |                                                     |       |       |                                                                 |       |       |
| P31061          | NohA         |                      | Monomer               | 128.0                                               | 108.2 | 83.5  | 12.4                                                            | 10.5  | 8.1   |
| P31062          | NohB         |                      | Monomer               | 130.4                                               | 110.2 | 85.1  | 12.9                                                            | 10.9  | 8.4   |
| P37013          | NorR         |                      | Monomer               | 88.3                                                | 74.6  | 57.6  | 5.2                                                             | 4.4   | 3.4   |
| Q46877          | NorV         | Cytoplasm            | Monomer               | 88.9                                                | 75.1  | 58.0  | 5.3                                                             | 4.5   | 3.4   |
|                 |              |                      | Homotetramer          | 51.6                                                | 42.2  | 33.7  | 1.2                                                             | 1.0   | 0.8   |

| UniProtKB A. N. | Protein name | Subcellular location | Subunit               | $D_0 \left( \frac{\mu\text{m}^2}{\text{s}} \right)$ |       |       | $D_{\text{cyto}} \left( \frac{\mu\text{m}^2}{\text{s}} \right)$ |       |       |
|-----------------|--------------|----------------------|-----------------------|-----------------------------------------------------|-------|-------|-----------------------------------------------------------------|-------|-------|
|                 |              |                      |                       | 310 K                                               | 303 K | 293 K | 310 K                                                           | 303 K | 293 K |
| P37596          | NorW         | Cytoplasm            | Monomer               | 98.8                                                | 83.5  | 64.5  | 6.8                                                             | 5.8   | 4.4   |
| P00452          | NrdA         |                      | Monomer               | 74.3                                                | 62.8  | 48.5  | 3.3                                                             | 2.8   | 2.2   |
| P69924          | NrdB         |                      | Monomer               | 96.9                                                | 81.9  | 63.3  | 6.5                                                             | 5.5   | 4.2   |
| P28903          | NrdD         |                      | Monomer               | 76.3                                                | 64.5  | 49.8  | 3.6                                                             | 3.0   | 2.3   |
| P39452          | NrdE         |                      | Monomer               | 76.2                                                | 64.4  | 49.7  | 3.6                                                             | 3.0   | 2.3   |
| P37146          | NrdF         |                      | Monomer               | 103.9                                               | 87.8  | 67.8  | 7.7                                                             | 6.5   | 5.0   |
| P0A9N8          | NrdG         | Cytoplasm            | Monomer               | 138.7                                               | 117.2 | 90.5  | 14.8                                                            | 12.5  | 9.6   |
| P0AC65          | NrdH         |                      | Monomer               | 178.7                                               | 151.0 | 116.6 | 25.1                                                            | 21.2  | 16.4  |
| P0A772          | NrdI         |                      | Monomer               | 145.9                                               | 123.2 | 95.2  | 16.5                                                            | 13.9  | 10.7  |
| P0A8D0          | NrdR         |                      | Monomer               | 139.4                                               | 117.8 | 91.0  | 14.9                                                            | 12.6  | 9.7   |
| P0ABK9          | NrfA         | Periplasm            | Monomer               | 89.3                                                | 75.4  | 58.2  | 5.3                                                             | 4.5   | 3.5   |
|                 |              |                      | Complex with SecB     | 64.5                                                | 52.7  | 42.1  | 2.3                                                             | 1.9   | 1.5   |
|                 |              |                      | Complex with TF (Tig) | 69.4                                                | 58.7  | 45.3  | 2.8                                                             | 2.4   | 1.8   |
| P0ABL1          | NrfB         | Periplasm            | Monomer               | 129.7                                               | 109.6 | 84.6  | 12.7                                                            | 10.8  | 8.3   |
|                 |              |                      | Complex with SecB     | 73.0                                                | 59.6  | 47.6  | 3.2                                                             | 2.6   | 2.1   |
|                 |              |                      | Complex with TF (Tig) | 81.0                                                | 68.4  | 52.8  | 4.2                                                             | 3.5   | 2.7   |
| P0AAK7          | NrfC         |                      | Monomer               | 121.3                                               | 102.5 | 79.1  | 11.0                                                            | 9.3   | 7.2   |
| P32709          | NrfD         | Cell inner membrane  | Monomer               | 105.5                                               | 89.1  | 68.9  | 8.0                                                             | 6.7   | 5.2   |
|                 |              |                      | Complex with SecB     | 68.9                                                | 56.2  | 44.9  | 2.7                                                             | 2.2   | 1.8   |
|                 |              |                      | Complex with TF (Tig) | 75.2                                                | 63.5  | 49.1  | 3.4                                                             | 2.9   | 2.2   |
| P32710          | NrfE         | Cell inner membrane  | Monomer               | 84.8                                                | 71.6  | 55.3  | 4.7                                                             | 4.0   | 3.1   |
|                 |              |                      | Complex with SecB     | 63.0                                                | 51.5  | 41.1  | 2.1                                                             | 1.8   | 1.4   |
|                 |              |                      | Complex with TF (Tig) | 67.5                                                | 57.0  | 44.1  | 2.6                                                             | 2.2   | 1.7   |
| P32711          | NrfF         | Periplasm            | Monomer               | 149.0                                               | 125.9 | 97.3  | 17.2                                                            | 14.6  | 11.2  |
|                 |              |                      | Complex with SecB     | 75.0                                                | 61.3  | 49.0  | 3.4                                                             | 2.8   | 2.2   |
|                 |              |                      | Complex with TF (Tig) | 84.0                                                | 71.0  | 54.8  | 4.6                                                             | 3.9   | 3.0   |
| P32712          | NrfG         |                      | Monomer               | 124.9                                               | 105.5 | 81.5  | 11.7                                                            | 9.9   | 7.6   |
| P0A9E9          | Nsr          | Cytoplasm            | Monomer               | 119.9                                               | 101.3 | 78.2  | 10.7                                                            | 9.0   | 7.0   |
|                 |              |                      | Homodimer             | 91.4                                                | 74.7  | 59.6  | 5.6                                                             | 4.6   | 3.7   |
| P0AF63          | NsrR         |                      | Monomer               | 144.9                                               | 122.5 | 94.6  | 16.2                                                            | 13.7  | 10.6  |
| P0AB83          | Nth          |                      | Monomer               | 123.3                                               | 104.2 | 80.5  | 11.4                                                            | 9.6   | 7.4   |

| UniProtKB A. N. | Protein name | Subcellular location           | Subunit               | $D_0 \left( \frac{\mu\text{m}^2}{\text{s}} \right)$ |       |       | $D_{\text{cyto}} \left( \frac{\mu\text{m}^2}{\text{s}} \right)$ |       |       |
|-----------------|--------------|--------------------------------|-----------------------|-----------------------------------------------------|-------|-------|-----------------------------------------------------------------|-------|-------|
|                 |              |                                |                       | 310 K                                               | 303 K | 293 K | 310 K                                                           | 303 K | 293 K |
| P0AFC0          | NudB         |                                | Monomer               | 139.1                                               | 117.5 | 90.8  | 14.9                                                            | 12.6  | 9.7   |
| P32664          | NudC         |                                | Monomer               | 112.6                                               | 95.1  | 73.5  | 9.3                                                             | 7.8   | 6.0   |
|                 |              |                                | Homodimer             | 85.8                                                | 70.1  | 56.0  | 4.8                                                             | 3.9   | 3.1   |
| P32056          | NudD         |                                | Monomer               | 136.2                                               | 115.1 | 88.9  | 14.2                                                            | 12.0  | 9.3   |
|                 |              |                                | Homodimer             | 103.8                                               | 84.8  | 67.7  | 7.7                                                             | 6.3   | 5.0   |
| P45799          | NudE         |                                | Monomer               | 128.6                                               | 108.7 | 83.9  | 12.5                                                            | 10.6  | 8.2   |
|                 |              |                                | Homodimer             | 98.0                                                | 80.1  | 64.0  | 6.7                                                             | 5.5   | 4.4   |
| Q93K97          | NudF         |                                | Monomer               | 123.1                                               | 104.0 | 80.3  | 11.3                                                            | 9.6   | 7.4   |
|                 |              |                                | Homodimer             | 93.8                                                | 76.6  | 61.2  | 6.0                                                             | 4.9   | 3.9   |
| P77788          | NudG         |                                | Monomer               | 147.0                                               | 124.2 | 95.9  | 16.7                                                            | 14.1  | 10.9  |
| P52006          | NudI         |                                | Monomer               | 142.2                                               | 120.1 | 92.8  | 15.6                                                            | 13.2  | 10.2  |
| P0AEI6          | NudJ         |                                | Monomer               | 138.7                                               | 117.2 | 90.5  | 14.8                                                            | 12.5  | 9.6   |
| P37128          | NudK         |                                | Monomer               | 127.2                                               | 107.5 | 83.0  | 12.2                                                            | 10.3  | 8.0   |
|                 |              |                                | Homodimer             | 97.0                                                | 79.2  | 63.3  | 6.5                                                             | 5.3   | 4.2   |
| P43337          | NudL         |                                | Monomer               | 127.9                                               | 108.1 | 83.5  | 12.4                                                            | 10.4  | 8.1   |
| P0AFC3          | NuoA         | Cell inner membrane            | Monomer               | 141.9                                               | 119.9 | 92.6  | 15.5                                                            | 13.1  | 10.1  |
|                 |              |                                | Complex with SecB     | 74.4                                                | 60.8  | 48.5  | 3.3                                                             | 2.7   | 2.2   |
|                 |              |                                | Complex with TF (Tig) | 83.0                                                | 70.1  | 54.2  | 4.4                                                             | 3.7   | 2.9   |
| P0AFC7          | NuoB         | Cell inner membrane            | Monomer               | 120.4                                               | 101.7 | 78.5  | 10.8                                                            | 9.1   | 7.0   |
| P33599          | NuoC         | Cytoplasm. Cell inner membrane | Monomer               | 81.3                                                | 68.7  | 53.0  | 4.2                                                             | 3.6   | 2.7   |
| P0AFD1          | NuoE         |                                | Monomer               | 135.3                                               | 114.3 | 88.3  | 14.0                                                            | 11.8  | 9.1   |
| P31979          | NuoF         |                                | Monomer               | 92.3                                                | 78.0  | 60.2  | 5.8                                                             | 4.9   | 3.8   |
| P33602          | NuoG         | Cytoplasm. Cell inner membrane | Monomer               | 69.9                                                | 59.0  | 45.6  | 2.8                                                             | 2.4   | 1.9   |
| P0AFD4          | NuoH         | Cell inner membrane            | Monomer               | 104.2                                               | 88.0  | 68.0  | 7.7                                                             | 6.5   | 5.0   |
|                 |              |                                | Complex with SecB     | 68.5                                                | 56.0  | 44.7  | 2.7                                                             | 2.2   | 1.8   |
|                 |              |                                | Complex with TF (Tig) | 74.8                                                | 63.2  | 48.8  | 3.4                                                             | 2.9   | 2.2   |
| P0AFD6          | NuoI         | Cell inner membrane            | Monomer               | 130.1                                               | 109.9 | 84.9  | 12.8                                                            | 10.8  | 8.4   |
|                 |              |                                | Complex with SecB     | 73.0                                                | 59.7  | 47.6  | 3.2                                                             | 2.6   | 2.1   |
|                 |              |                                | Complex with TF (Tig) | 81.0                                                | 68.5  | 52.9  | 4.2                                                             | 3.5   | 2.7   |

| UniProtKB A. N. | Protein name | Subcellular location | Subunit               | $D_0 \left( \frac{\mu\text{m}^2}{\text{s}} \right)$ |       |       | $D_{\text{cyto}} \left( \frac{\mu\text{m}^2}{\text{s}} \right)$ |       |       |
|-----------------|--------------|----------------------|-----------------------|-----------------------------------------------------|-------|-------|-----------------------------------------------------------------|-------|-------|
|                 |              |                      |                       | 310 K                                               | 303 K | 293 K | 310 K                                                           | 303 K | 293 K |
| P0AFE0          | NuoJ         | Cell inner membrane  | Monomer               | 131.8                                               | 111.3 | 86.0  | 13.2                                                            | 11.2  | 8.6   |
|                 |              |                      | Complex with SecB     | 73.2                                                | 59.8  | 47.8  | 3.2                                                             | 2.6   | 2.1   |
|                 |              |                      | Complex with TF (Tig) | 81.3                                                | 68.7  | 53.1  | 4.2                                                             | 3.6   | 2.8   |
| P0AFE4          | NuoK         | Cell inner membrane  | Monomer               | 167.1                                               | 141.2 | 109.1 | 21.9                                                            | 18.5  | 14.3  |
|                 |              |                      | Complex with SecB     | 76.4                                                | 62.4  | 49.8  | 3.6                                                             | 2.9   | 2.3   |
|                 |              |                      | Complex with TF (Tig) | 86.0                                                | 72.7  | 56.1  | 4.9                                                             | 4.1   | 3.2   |
| P33607          | NuoL         | Cell inner membrane  | Monomer               | 82.1                                                | 69.4  | 53.6  | 4.3                                                             | 3.6   | 2.8   |
|                 |              |                      | Complex with SecB     | 62.1                                                | 50.7  | 40.5  | 2.1                                                             | 1.7   | 1.3   |
|                 |              |                      | Complex with TF (Tig) | 66.3                                                | 56.0  | 43.3  | 2.5                                                             | 2.1   | 1.6   |
| P0AFE8          | NuoM         | Cell inner membrane  | Monomer               | 87.5                                                | 73.9  | 57.1  | 5.1                                                             | 4.3   | 3.3   |
|                 |              |                      | Complex with SecB     | 64.0                                                | 52.3  | 41.7  | 2.2                                                             | 1.8   | 1.5   |
|                 |              |                      | Complex with TF (Tig) | 68.7                                                | 58.0  | 44.8  | 2.7                                                             | 2.3   | 1.8   |
| P0AFF0          | NuoN         | Cell inner membrane  | Monomer               | 90.4                                                | 76.3  | 59.0  | 5.5                                                             | 4.6   | 3.6   |
|                 |              |                      | Complex with SecB     | 64.9                                                | 53.0  | 42.3  | 2.3                                                             | 1.9   | 1.5   |
|                 |              |                      | Complex with TF (Tig) | 69.9                                                | 59.0  | 45.6  | 2.8                                                             | 2.4   | 1.9   |
| P0AFF2          | NupC         | Cell inner membrane  | Monomer               | 97.0                                                | 81.9  | 63.3  | 6.5                                                             | 5.5   | 4.2   |
|                 |              |                      | Complex with SecB     | 66.8                                                | 54.6  | 43.6  | 2.5                                                             | 2.1   | 1.6   |
|                 |              |                      | Complex with TF (Tig) | 72.4                                                | 61.2  | 47.2  | 3.1                                                             | 2.6   | 2.0   |
| P0AFF4          | NupG         | Cell inner membrane  | Monomer               | 94.5                                                | 79.9  | 61.7  | 6.1                                                             | 5.2   | 4.0   |
|                 |              |                      | Complex with SecB     | 66.1                                                | 54.0  | 43.1  | 2.4                                                             | 2.0   | 1.6   |
|                 |              |                      | Complex with TF (Tig) | 71.5                                                | 60.4  | 46.7  | 3.0                                                             | 2.5   | 2.0   |
| P33021          | NupX         | Cell inner membrane  | Monomer               | 97.0                                                | 82.0  | 63.3  | 6.5                                                             | 5.5   | 4.3   |
|                 |              |                      | Complex with SecB     | 66.8                                                | 54.6  | 43.6  | 2.5                                                             | 2.1   | 1.6   |
|                 |              |                      | Complex with TF (Tig) | 72.4                                                | 61.2  | 47.2  | 3.1                                                             | 2.6   | 2.0   |
| P0AFF6          | NusA         |                      | Monomer               | 88.5                                                | 74.8  | 57.8  | 5.2                                                             | 4.4   | 3.4   |
| P0A780          | NusB         |                      | Monomer               | 144.6                                               | 122.2 | 94.4  | 16.2                                                            | 13.6  | 10.5  |
| P0AFG0          | NusG         |                      | Monomer               | 130.1                                               | 109.9 | 84.9  | 12.8                                                            | 10.8  | 8.4   |
| P42641          | ObgE         | Cytoplasm            | Monomer               | 97.1                                                | 82.1  | 63.4  | 6.5                                                             | 5.5   | 4.3   |
| P37057          | OgrK         |                      | Monomer               | 184.5                                               | 155.8 | 120.4 | 26.8                                                            | 22.6  | 17.5  |
| P0AFH0          | Ogt          |                      | Monomer               | 133.6                                               | 112.9 | 87.2  | 13.6                                                            | 11.5  | 8.9   |
| P0A910          | OmpA         | Cell outer membrane  | Monomer               | 103.1                                               | 87.1  | 67.3  | 7.5                                                             | 6.4   | 4.9   |

| UniProtKB A. N. | Protein name | Subcellular location | Subunit               | $D_0 \left( \frac{\mu\text{m}^2}{\text{s}} \right)$ |       |       | $D_{\text{cyto}} \left( \frac{\mu\text{m}^2}{\text{s}} \right)$ |       |       |
|-----------------|--------------|----------------------|-----------------------|-----------------------------------------------------|-------|-------|-----------------------------------------------------------------|-------|-------|
|                 |              |                      |                       | 310 K                                               | 303 K | 293 K | 310 K                                                           | 303 K | 293 K |
|                 |              |                      | Complex with SecB     | 68.3                                                | 55.8  | 44.6  | 2.7                                                             | 2.2   | 1.7   |
|                 |              |                      | Complex with TF (Tig) | 74.4                                                | 62.9  | 48.6  | 3.4                                                             | 2.8   | 2.2   |
| P06996          | OmpC         | Cell outer membrane  | Monomer               | 99.8                                                | 84.3  | 65.1  | 7.0                                                             | 5.9   | 4.6   |
|                 |              |                      | Complex with SecB     | 67.5                                                | 55.2  | 44.1  | 2.6                                                             | 2.1   | 1.7   |
|                 |              |                      | Complex with TF (Tig) | 73.4                                                | 62.0  | 47.9  | 3.2                                                             | 2.7   | 2.1   |
| P02931          | OmpF         | Cell outer membrane  | Monomer               | 100.9                                               | 85.2  | 65.8  | 7.2                                                             | 6.0   | 4.7   |
|                 |              |                      | Complex with SecB     | 67.8                                                | 55.4  | 44.2  | 2.6                                                             | 2.1   | 1.7   |
|                 |              |                      | Complex with TF (Tig) | 73.7                                                | 62.3  | 48.1  | 3.3                                                             | 2.8   | 2.1   |
| P76045          | OmpG         | Cell outer membrane  | Monomer               | 105.7                                               | 89.3  | 69.0  | 8.0                                                             | 6.7   | 5.2   |
|                 |              |                      | Complex with SecB     | 68.9                                                | 56.3  | 45.0  | 2.7                                                             | 2.2   | 1.8   |
|                 |              |                      | Complex with TF (Tig) | 75.2                                                | 63.5  | 49.1  | 3.4                                                             | 2.9   | 2.2   |
| P76773          | OmpL         | Cell outer membrane  | Monomer               | 116.5                                               | 98.5  | 76.0  | 10.0                                                            | 8.5   | 6.5   |
|                 |              |                      | Complex with SecB     | 71.0                                                | 58.0  | 46.3  | 3.0                                                             | 2.4   | 1.9   |
|                 |              |                      | Complex with TF (Tig) | 78.1                                                | 66.0  | 51.0  | 3.8                                                             | 3.2   | 2.5   |
| P77747          | OmpN         | Cell outer membrane  | Monomer               | 99.0                                                | 83.7  | 64.6  | 6.8                                                             | 5.8   | 4.5   |
|                 |              |                      | Complex with SecB     | 67.3                                                | 55.0  | 43.9  | 2.6                                                             | 2.1   | 1.7   |
|                 |              |                      | Complex with TF (Tig) | 73.1                                                | 61.8  | 47.7  | 3.2                                                             | 2.7   | 2.1   |
| P0AA16          | OmpR         | Cytoplasm            | Monomer               | 116.3                                               | 98.2  | 75.9  | 10.0                                                            | 8.4   | 6.5   |
| P09169          | OmpT         | Cell outer membrane  | Monomer               | 104.9                                               | 88.6  | 68.5  | 7.9                                                             | 6.6   | 5.1   |
|                 |              |                      | Complex with SecB     | 68.7                                                | 56.1  | 44.8  | 2.7                                                             | 2.2   | 1.8   |
|                 |              |                      | Complex with TF (Tig) | 75.0                                                | 63.4  | 48.9  | 3.4                                                             | 2.9   | 2.2   |
| P0A915          | OmpW         | Cell outer membrane  | Monomer               | 124.6                                               | 105.3 | 81.3  | 11.7                                                            | 9.8   | 7.6   |
|                 |              |                      | Complex with SecB     | 72.3                                                | 59.0  | 47.2  | 3.1                                                             | 2.5   | 2.0   |
|                 |              |                      | Complex with TF (Tig) | 80.0                                                | 67.5  | 52.2  | 4.0                                                             | 3.4   | 2.6   |
| P0A917          | OmpX         | Cell outer membrane  | Monomer               | 135.3                                               | 114.3 | 88.3  | 14.0                                                            | 11.8  | 9.1   |
|                 |              |                      | Complex with SecB     | 73.6                                                | 60.2  | 48.1  | 3.3                                                             | 2.7   | 2.1   |
|                 |              |                      | Complex with TF (Tig) | 81.9                                                | 69.2  | 53.5  | 4.3                                                             | 3.6   | 2.8   |
| P23843          | OppA         | Periplasm            | Monomer               | 85.0                                                | 71.8  | 55.4  | 4.7                                                             | 4.0   | 3.1   |
|                 |              |                      | Complex with SecB     | 63.1                                                | 51.6  | 41.2  | 2.2                                                             | 1.8   | 1.4   |
|                 |              |                      | Complex with TF (Tig) | 67.6                                                | 57.1  | 44.1  | 2.6                                                             | 2.2   | 1.7   |
| P0AFH2          | OppB         | Cell inner membrane  | Monomer               | 107.5                                               | 90.8  | 70.1  | 8.3                                                             | 7.0   | 5.4   |

| UniProtKB A. N. | Protein name | Subcellular location | Subunit               | $D_0 \left( \frac{\mu\text{m}^2}{\text{s}} \right)$ |       |       | $D_{\text{cyto}} \left( \frac{\mu\text{m}^2}{\text{s}} \right)$ |       |       |
|-----------------|--------------|----------------------|-----------------------|-----------------------------------------------------|-------|-------|-----------------------------------------------------------------|-------|-------|
|                 |              |                      |                       | 310 K                                               | 303 K | 293 K | 310 K                                                           | 303 K | 293 K |
|                 |              |                      | Complex with SecB     | 69.3                                                | 56.6  | 45.2  | 2.8                                                             | 2.3   | 1.8   |
|                 |              |                      | Complex with TF (Tig) | 75.7                                                | 64.0  | 49.4  | 3.5                                                             | 3.0   | 2.3   |
| P0AFH6          | OppC         | Cell inner membrane  | Monomer               | 108.0                                               | 91.2  | 70.5  | 8.4                                                             | 7.1   | 5.5   |
|                 |              |                      | Complex with SecB     | 69.4                                                | 56.7  | 45.3  | 2.8                                                             | 2.3   | 1.8   |
|                 |              |                      | Complex with TF (Tig) | 75.9                                                | 64.1  | 49.5  | 3.5                                                             | 3.0   | 2.3   |
| P76027          | OppD         | Cell inner membrane  | Monomer               | 103.1                                               | 87.1  | 67.3  | 7.5                                                             | 6.4   | 4.9   |
|                 |              |                      | Complex with SecB     | 68.3                                                | 55.8  | 44.6  | 2.7                                                             | 2.2   | 1.7   |
|                 |              |                      | Complex with TF (Tig) | 74.4                                                | 62.9  | 48.6  | 3.4                                                             | 2.8   | 2.2   |
| P77737          | OppF         | Cell inner membrane  | Monomer               | 103.1                                               | 87.1  | 67.3  | 7.5                                                             | 6.4   | 4.9   |
|                 |              |                      | Complex with SecB     | 68.3                                                | 55.8  | 44.6  | 2.7                                                             | 2.2   | 1.7   |
|                 |              |                      | Complex with TF (Tig) | 74.4                                                | 62.9  | 48.6  | 3.4                                                             | 2.8   | 2.2   |
| P0A784          | Orn          | Cytoplasm            | Monomer               | 129.4                                               | 109.3 | 84.5  | 12.7                                                            | 10.7  | 8.3   |
|                 |              |                      | Homodimer             | 98.6                                                | 80.6  | 64.4  | 6.8                                                             | 5.5   | 4.4   |
| P0ADA7          | OsmB         | Cell membrane        | Monomer               | 199.0                                               | 168.1 | 129.8 | 31.2                                                            | 26.3  | 20.3  |
|                 |              |                      | Complex with SecB     | 77.9                                                | 63.6  | 50.8  | 3.8                                                             | 3.1   | 2.5   |
|                 |              |                      | Complex with TF (Tig) | 88.3                                                | 74.6  | 57.6  | 5.2                                                             | 4.4   | 3.4   |
| P0C0L2          | OsmC         | Cytoplasm            | Monomer               | 146.8                                               | 124.0 | 95.8  | 16.7                                                            | 14.1  | 10.9  |
| P0ADB1          | OsmE         | Cell membrane        | Monomer               | 160.5                                               | 135.6 | 104.7 | 20.1                                                            | 17.0  | 13.1  |
|                 |              |                      | Complex with SecB     | 75.9                                                | 62.0  | 49.6  | 3.5                                                             | 2.9   | 2.3   |
|                 |              |                      | Complex with TF (Tig) | 85.3                                                | 72.1  | 55.7  | 4.8                                                             | 4.0   | 3.1   |
| P33362          | OsmF         | Periplasm            | Monomer               | 108.5                                               | 91.7  | 70.8  | 8.5                                                             | 7.2   | 5.5   |
|                 |              |                      | Complex with SecB     | 69.5                                                | 56.8  | 45.3  | 2.8                                                             | 2.3   | 1.8   |
|                 |              |                      | Complex with TF (Tig) | 76.1                                                | 64.3  | 49.6  | 3.5                                                             | 3.0   | 2.3   |
| P0AFH8          | OsmY         | Periplasm            | Monomer               | 128.8                                               | 108.8 | 84.1  | 12.5                                                            | 10.6  | 8.2   |
|                 |              |                      | Complex with SecB     | 72.8                                                | 59.5  | 47.5  | 3.2                                                             | 2.6   | 2.1   |
|                 |              |                      | Complex with TF (Tig) | 80.8                                                | 68.3  | 52.7  | 4.1                                                             | 3.5   | 2.7   |
| P31677          | OtsA         |                      | Monomer               | 89.3                                                | 75.5  | 58.3  | 5.3                                                             | 4.5   | 3.5   |
|                 |              |                      | Homotetramer          | 51.9                                                | 42.4  | 33.9  | 1.2                                                             | 1.0   | 0.8   |
| P31678          | OtsB         |                      | Monomer               | 113.4                                               | 95.8  | 74.0  | 9.4                                                             | 7.9   | 6.1   |
| P25714          | OxaA         | Cell inner membrane  | Monomer               | 84.6                                                | 71.5  | 55.2  | 4.7                                                             | 3.9   | 3.0   |
|                 |              |                      | Complex with SecB     | 63.0                                                | 51.5  | 41.1  | 2.1                                                             | 1.8   | 1.4   |

| UniProtKB A. N. | Protein name | Subcellular location | Subunit               | $D_0 \left( \frac{\mu\text{m}^2}{\text{s}} \right)$ |       |       | $D_{\text{cyto}} \left( \frac{\mu\text{m}^2}{\text{s}} \right)$ |       |       |
|-----------------|--------------|----------------------|-----------------------|-----------------------------------------------------|-------|-------|-----------------------------------------------------------------|-------|-------|
|                 |              |                      |                       | 310 K                                               | 303 K | 293 K | 310 K                                                           | 303 K | 293 K |
|                 |              |                      | Complex with TF (Tig) | 67.5                                                | 57.0  | 44.0  | 2.6                                                             | 2.2   | 1.7   |
| P0AF10          | Oxc          |                      | Monomer               | 85.1                                                | 71.9  | 55.6  | 4.7                                                             | 4.0   | 3.1   |
|                 |              |                      | Monomer               | 106.4                                               | 89.9  | 69.5  | 8.1                                                             | 6.9   | 5.3   |
| P0ACQ4          | OxyR         |                      | Homodimer             | 81.1                                                | 66.3  | 52.9  | 4.2                                                             | 3.4   | 2.7   |
|                 |              |                      | Homotetramer          | 61.8                                                | 52.2  | 40.3  | 2.0                                                             | 1.7   | 1.3   |
| P76077          | PaaA         |                      | Monomer               | 105.0                                               | 88.7  | 68.5  | 7.9                                                             | 6.6   | 5.1   |
| P76078          | PaaB         |                      | Monomer               | 166.5                                               | 140.7 | 108.7 | 21.7                                                            | 18.4  | 14.2  |
| P76079          | PaaC         |                      | Monomer               | 115.4                                               | 97.5  | 75.3  | 9.8                                                             | 8.3   | 6.4   |
| P76080          | PaaD         |                      | Monomer               | 136.1                                               | 114.9 | 88.8  | 14.2                                                            | 12.0  | 9.2   |
| P76081          | PaaE         |                      | Monomer               | 100.9                                               | 85.2  | 65.8  | 7.2                                                             | 6.0   | 4.7   |
| P76082          | PaaF         |                      | Monomer               | 116.5                                               | 98.4  | 76.0  | 10.0                                                            | 8.5   | 6.5   |
| P77467          | PaaG         |                      | Monomer               | 114.6                                               | 96.8  | 74.8  | 9.6                                                             | 8.1   | 6.3   |
| P76083          | PaaH         |                      | Monomer               | 90.6                                                | 76.5  | 59.1  | 5.5                                                             | 4.7   | 3.6   |
|                 |              |                      | Monomer               | 147.7                                               | 124.8 | 96.4  | 16.9                                                            | 14.3  | 11.0  |
| P76084          | PaaI         |                      | Homotetramer          | 85.8                                                | 70.1  | 56.0  | 4.8                                                             | 3.9   | 3.1   |
| P0C7L2          | PaaJ         |                      | Monomer               | 98.0                                                | 82.8  | 64.0  | 6.7                                                             | 5.6   | 4.4   |
| P76085          | PaaK         |                      | Monomer               | 92.6                                                | 78.2  | 60.4  | 5.8                                                             | 4.9   | 3.8   |
| P76086          | PaaX         |                      | Monomer               | 105.2                                               | 88.9  | 68.7  | 7.9                                                             | 6.7   | 5.2   |
| P77181          | PaaY         |                      | Monomer               | 128.2                                               | 108.3 | 83.7  | 12.4                                                            | 10.5  | 8.1   |
| P00903          | PabA         |                      | Monomer               | 129.5                                               | 109.4 | 84.5  | 12.7                                                            | 10.7  | 8.3   |
| P05041          | PabB         |                      | Monomer               | 91.1                                                | 77.0  | 59.5  | 5.6                                                             | 4.7   | 3.7   |
|                 |              |                      | Monomer               | 112.6                                               | 95.1  | 73.5  | 9.3                                                             | 7.8   | 6.0   |
| P28305          | PabC         |                      | Homodimer             | 85.8                                                | 70.1  | 56.0  | 4.8                                                             | 3.9   | 3.1   |
|                 |              |                      | Monomer               | 134.6                                               | 113.7 | 87.9  | 13.8                                                            | 11.7  | 9.0   |
| P0A912          | Pal          | Cell outer membrane  | Complex with SecB     | 73.6                                                | 60.1  | 48.0  | 3.3                                                             | 2.7   | 2.1   |
|                 |              |                      | Complex with TF (Tig) | 81.8                                                | 69.1  | 53.4  | 4.3                                                             | 3.6   | 2.8   |
|                 |              |                      | Monomer               | 114.8                                               | 97.0  | 74.9  | 9.7                                                             | 8.2   | 6.3   |
| P31057          | PanB         | Cytoplasm            | Homodecamer           | 46.6                                                | 38.0  | 30.4  | 0.9                                                             | 0.7   | 0.6   |
|                 |              |                      | Monomer               | 109.9                                               | 92.8  | 71.7  | 8.8                                                             | 7.4   | 5.7   |
| P31663          | PanC         | Cytoplasm            | Homodimer             | 83.7                                                | 68.4  | 54.6  | 4.5                                                             | 3.7   | 3.0   |
| P0A790          | PanD         | Cytoplasm            | Monomer               | 151.9                                               | 128.3 | 99.1  | 17.9                                                            | 15.2  | 11.7  |



| UniProtKB A. N. | Protein name | Subcellular location | Subunit               | $D_0 \left( \frac{\mu\text{m}^2}{\text{s}} \right)$ |       |       | $D_{\text{cyto}} \left( \frac{\mu\text{m}^2}{\text{s}} \right)$ |       |       |
|-----------------|--------------|----------------------|-----------------------|-----------------------------------------------------|-------|-------|-----------------------------------------------------------------|-------|-------|
|                 |              |                      |                       | 310 K                                               | 303 K | 293 K | 310 K                                                           | 303 K | 293 K |
| P0A9J4          | PanE         | Cytoplasm            | Monomer               | 106.9                                               | 90.3  | 69.8  | 8.2                                                             | 6.9   | 5.4   |
| P16256          | PanF         | Cell inner membrane  | Monomer               | 90.6                                                | 76.5  | 59.1  | 5.5                                                             | 4.7   | 3.6   |
|                 |              |                      | Complex with SecB     | 65.0                                                | 53.1  | 42.4  | 2.3                                                             | 1.9   | 1.5   |
|                 |              |                      | Complex with TF (Tig) | 70.0                                                | 59.1  | 45.7  | 2.9                                                             | 2.4   | 1.9   |
| P0AFI2          | ParC         | Cell membrane        | Monomer               | 75.0                                                | 63.3  | 48.9  | 3.4                                                             | 2.9   | 2.2   |
|                 |              |                      | Complex with SecB     | 59.2                                                | 48.4  | 38.6  | 1.8                                                             | 1.5   | 1.2   |
|                 |              |                      | Complex with TF (Tig) | 62.7                                                | 53.0  | 40.9  | 2.1                                                             | 1.8   | 1.4   |
| P20083          | ParE         |                      | Monomer               | 80.3                                                | 67.9  | 52.4  | 4.1                                                             | 3.5   | 2.7   |
| P42588          | PatA         |                      | Monomer               | 92.0                                                | 77.8  | 60.1  | 5.7                                                             | 4.8   | 3.7   |
| Q46790          | Pbl          | Periplasm            | Monomer               | 136.2                                               | 115.1 | 88.9  | 14.2                                                            | 12.0  | 9.3   |
|                 |              |                      | Complex with SecB     | 73.8                                                | 60.3  | 48.1  | 3.3                                                             | 2.7   | 2.1   |
|                 |              |                      | Complex with TF (Tig) | 82.1                                                | 69.4  | 53.6  | 4.3                                                             | 3.6   | 2.8   |
| P76577          | PbpC         | Cell inner membrane  | Monomer               | 74.5                                                | 63.0  | 48.6  | 3.4                                                             | 2.8   | 2.2   |
|                 |              |                      | Complex with SecB     | 59.0                                                | 48.2  | 38.5  | 1.8                                                             | 1.5   | 1.2   |
|                 |              |                      | Complex with TF (Tig) | 62.5                                                | 52.8  | 40.8  | 2.1                                                             | 1.8   | 1.4   |
| P0AFI5          | PbpG         | Periplasm            | Monomer               | 106.9                                               | 90.3  | 69.8  | 8.2                                                             | 6.9   | 5.4   |
|                 |              |                      | Complex with SecB     | 69.2                                                | 56.5  | 45.1  | 2.8                                                             | 2.3   | 1.8   |
|                 |              |                      | Complex with TF (Tig) | 75.6                                                | 63.9  | 49.3  | 3.5                                                             | 2.9   | 2.3   |
| P22259          | PckA         | Cytoplasm            | Monomer               | 85.7                                                | 72.4  | 55.9  | 4.8                                                             | 4.1   | 3.1   |
| P0A7A5          | Pcm          | Cytoplasm            | Monomer               | 123.9                                               | 104.7 | 80.9  | 11.5                                                            | 9.7   | 7.5   |
| P0ABF1          | PcnB         |                      | Monomer               | 89.2                                                | 75.3  | 58.2  | 5.3                                                             | 4.5   | 3.5   |
| P0ACL9          | PdhR         |                      | Monomer               | 113.0                                               | 95.5  | 73.7  | 9.3                                                             | 7.9   | 6.1   |
| P19624          | PdxA         | Cytoplasm            | Monomer               | 105.4                                               | 89.1  | 68.8  | 7.9                                                             | 6.7   | 5.2   |
|                 |              |                      | Homodimer             | 80.4                                                | 65.6  | 52.4  | 4.1                                                             | 3.3   | 2.7   |
| P05459          | PdxB         | Cytoplasm            | Monomer               | 98.9                                                | 83.5  | 64.5  | 6.8                                                             | 5.8   | 4.5   |
|                 |              |                      | Homodimer             | 75.4                                                | 61.6  | 49.2  | 3.5                                                             | 2.8   | 2.3   |
| P0AFI7          | PdxH         |                      | Monomer               | 119.4                                               | 100.9 | 77.9  | 10.6                                                            | 9.0   | 6.9   |
|                 |              |                      | Homodimer             | 91.0                                                | 74.4  | 59.4  | 5.6                                                             | 4.6   | 3.6   |
| P0A794          | PdxJ         | Cytoplasm            | Monomer               | 117.9                                               | 99.6  | 77.0  | 10.3                                                            | 8.7   | 6.7   |
|                 |              |                      | Homooctamer           | 52.2                                                | 42.6  | 34.1  | 1.3                                                             | 1.0   | 0.8   |
| P40191          | PdxK         |                      | Monomer               | 110.9                                               | 93.7  | 72.4  | 8.9                                                             | 7.6   | 5.8   |

| UniProtKB A. N. | Protein name | Subcellular location | Subunit               | $D_0 \left( \frac{\mu\text{m}^2}{\text{s}} \right)$ |       |       | $D_{\text{cyto}} \left( \frac{\mu\text{m}^2}{\text{s}} \right)$ |       |       |
|-----------------|--------------|----------------------|-----------------------|-----------------------------------------------------|-------|-------|-----------------------------------------------------------------|-------|-------|
|                 |              |                      |                       | 310 K                                               | 303 K | 293 K | 310 K                                                           | 303 K | 293 K |
| P77150          | PdxY         |                      | Monomer               | 110.3                                               | 93.2  | 72.0  | 8.8                                                             | 7.5   | 5.8   |
|                 |              |                      | Homodimer             | 84.0                                                | 68.7  | 54.8  | 4.6                                                             | 3.7   | 3.0   |
| P68767          | PepA         |                      | Monomer               | 88.5                                                | 74.8  | 57.8  | 5.2                                                             | 4.4   | 3.4   |
|                 |              |                      | Homoheptamer          | 43.8                                                | 35.8  | 28.6  | 0.7                                                             | 0.6   | 0.5   |
| P37095          | PepB         | Cytoplasm            | Monomer               | 94.7                                                | 80.0  | 61.8  | 6.1                                                             | 5.2   | 4.0   |
|                 |              |                      | Homoheptamer          | 46.9                                                | 38.3  | 30.6  | 0.9                                                             | 0.8   | 0.6   |
| P15288          | PepD         |                      | Monomer               | 89.8                                                | 75.8  | 58.6  | 5.4                                                             | 4.6   | 3.5   |
| P0A7C6          | PepE         | Cytoplasm            | Monomer               | 121.3                                               | 102.5 | 79.1  | 11.0                                                            | 9.3   | 7.2   |
| P04825          | PepN         | Cell inner membrane  | Monomer               | 70.3                                                | 59.4  | 45.8  | 2.9                                                             | 2.4   | 1.9   |
| P15034          | PepP         | Cytoplasm            | Monomer               | 91.9                                                | 77.7  | 60.0  | 5.7                                                             | 4.8   | 3.7   |
|                 |              |                      | Homotetramer          | 53.4                                                | 43.6  | 34.8  | 1.3                                                             | 1.1   | 0.9   |
| P21165          | PepQ         |                      | Monomer               | 91.7                                                | 77.4  | 59.8  | 5.7                                                             | 4.8   | 3.7   |
| P29745          | PepT         | Cytoplasm            | Monomer               | 95.7                                                | 80.9  | 62.5  | 6.3                                                             | 5.3   | 4.1   |
|                 |              |                      | Homodimer             | 73.0                                                | 59.6  | 47.6  | 3.2                                                             | 2.6   | 2.1   |
| P0AFI9          | PerM         | Cell membrane        | Monomer               | 101.0                                               | 85.3  | 65.9  | 7.2                                                             | 6.1   | 4.7   |
|                 |              |                      | Complex with SecB     | 67.8                                                | 55.4  | 44.2  | 2.6                                                             | 2.1   | 1.7   |
|                 |              |                      | Complex with TF (Tig) | 73.8                                                | 62.3  | 48.1  | 3.3                                                             | 2.8   | 2.1   |
| Q57083          | PerR         |                      | Monomer               | 107.2                                               | 90.6  | 70.0  | 8.3                                                             | 7.0   | 5.4   |
| P0A796          | PfkA         | Cytoplasm            | Monomer               | 105.8                                               | 89.3  | 69.0  | 8.0                                                             | 6.8   | 5.2   |
|                 |              |                      | Homotetramer          | 61.4                                                | 50.2  | 40.1  | 2.0                                                             | 1.6   | 1.3   |
| P06999          | PfkB         |                      | Monomer               | 108.7                                               | 91.9  | 71.0  | 8.5                                                             | 7.2   | 5.6   |
|                 |              |                      | Homodimer             | 82.9                                                | 67.7  | 54.1  | 4.4                                                             | 3.6   | 2.9   |
| P0A9N4          | PflA         | Cytoplasm            | Monomer               | 114.9                                               | 97.1  | 75.0  | 9.7                                                             | 8.2   | 6.3   |
| P09373          | PflB         | Cytoplasm            | Monomer               | 74.4                                                | 62.9  | 48.6  | 3.4                                                             | 2.8   | 2.2   |
|                 |              |                      | Homodimer             | 56.7                                                | 46.3  | 37.0  | 1.6                                                             | 1.3   | 1.0   |
| P32675          | PflC         | Cytoplasm            | Monomer               | 108.8                                               | 91.9  | 71.0  | 8.5                                                             | 7.2   | 5.6   |
| P32674          | PflD         | Cytoplasm            | Monomer               | 74.2                                                | 62.7  | 48.4  | 3.3                                                             | 2.8   | 2.2   |
| P69434          | PgaA         | Cell outer membrane  | Monomer               | 72.2                                                | 61.0  | 47.1  | 3.1                                                             | 2.6   | 2.0   |
|                 |              |                      | Complex with SecB     | 58.0                                                | 47.4  | 37.8  | 1.7                                                             | 1.4   | 1.1   |
|                 |              |                      | Complex with TF (Tig) | 61.2                                                | 51.7  | 40.0  | 2.0                                                             | 1.7   | 1.3   |
| P75906          | PgaB         | Cell outer membrane  | Monomer               | 77.3                                                | 65.3  | 50.5  | 3.7                                                             | 3.1   | 2.4   |

| UniProtKB A. N. | Protein name | Subcellular location | Subunit               | $D_0 \left( \frac{\mu\text{m}^2}{\text{s}} \right)$ |       |       | $D_{\text{cyto}} \left( \frac{\mu\text{m}^2}{\text{s}} \right)$ |       |       |
|-----------------|--------------|----------------------|-----------------------|-----------------------------------------------------|-------|-------|-----------------------------------------------------------------|-------|-------|
|                 |              |                      |                       | 310 K                                               | 303 K | 293 K | 310 K                                                           | 303 K | 293 K |
|                 |              |                      | Complex with SecB     | 60.2                                                | 49.2  | 39.3  | 1.9                                                             | 1.5   | 1.2   |
|                 |              |                      | Complex with TF (Tig) | 64.0                                                | 54.0  | 41.7  | 2.2                                                             | 1.9   | 1.5   |
| P75905          | PgaC         | Cell inner membrane  | Monomer               | 91.3                                                | 77.1  | 59.5  | 5.6                                                             | 4.7   | 3.7   |
|                 |              |                      | Complex with SecB     | 65.2                                                | 53.2  | 42.5  | 2.4                                                             | 1.9   | 1.5   |
|                 |              |                      | Complex with TF (Tig) | 70.2                                                | 59.3  | 45.8  | 2.9                                                             | 2.4   | 1.9   |
| P69432          | PgaD         | Cell inner membrane  | Monomer               | 143.2                                               | 121.0 | 93.4  | 15.8                                                            | 13.4  | 10.3  |
|                 |              |                      | Complex with SecB     | 74.5                                                | 60.9  | 48.6  | 3.4                                                             | 2.7   | 2.2   |
|                 |              |                      | Complex with TF (Tig) | 83.2                                                | 70.3  | 54.3  | 4.5                                                             | 3.8   | 2.9   |
| P0A6T1          | Pgi          | Cytoplasm            | Monomer               | 84.6                                                | 71.5  | 55.2  | 4.7                                                             | 3.9   | 3.0   |
|                 |              |                      | Homodimer             | 64.5                                                | 52.7  | 42.1  | 2.3                                                             | 1.9   | 1.5   |
| P0A799          | Pgk          | Cytoplasm            | Monomer               | 99.1                                                | 83.7  | 64.7  | 6.9                                                             | 5.8   | 4.5   |
| P52697          | Pgl          |                      | Monomer               | 104.1                                               | 87.9  | 67.9  | 7.7                                                             | 6.5   | 5.0   |
| P36938          | Pgm          |                      | Monomer               | 86.4                                                | 73.0  | 56.4  | 4.9                                                             | 4.1   | 3.2   |
| P18200          | PgpA         | Cell inner membrane  | Monomer               | 133.0                                               | 112.4 | 86.8  | 13.5                                                            | 11.4  | 8.8   |
|                 |              |                      | Complex with SecB     | 73.4                                                | 59.9  | 47.9  | 3.2                                                             | 2.6   | 2.1   |
|                 |              |                      | Complex with TF (Tig) | 81.6                                                | 68.9  | 53.2  | 4.2                                                             | 3.6   | 2.8   |
| P0A924          | PgpB         | Cell inner membrane  | Monomer               | 113.6                                               | 96.0  | 74.1  | 9.5                                                             | 8.0   | 6.2   |
|                 |              |                      | Complex with SecB     | 70.5                                                | 57.6  | 46.0  | 2.9                                                             | 2.4   | 1.9   |
|                 |              |                      | Complex with TF (Tig) | 77.4                                                | 65.4  | 50.5  | 3.7                                                             | 3.1   | 2.4   |
| P0ABF8          | PgsA         | Cell inner membrane  | Monomer               | 129.7                                               | 109.6 | 84.6  | 12.7                                                            | 10.8  | 8.3   |
|                 |              |                      | Complex with SecB     | 73.0                                                | 59.6  | 47.6  | 3.2                                                             | 2.6   | 2.1   |
|                 |              |                      | Complex with TF (Tig) | 81.0                                                | 68.4  | 52.8  | 4.2                                                             | 3.5   | 2.7   |
| P0A9J8          | PheA         | Cytoplasm            | Monomer               | 97.3                                                | 82.2  | 63.5  | 6.6                                                             | 5.5   | 4.3   |
| P0AD72          | PheL         |                      | Monomer               | 329.2                                               | 278.1 | 214.8 | 79.2                                                            | 66.9  | 51.7  |
| P0AD74          | PheM         |                      | Monomer               | 340.7                                               | 287.8 | 222.3 | 84.1                                                            | 71.1  | 54.9  |
| P24207          | PheP         | Cell inner membrane  | Monomer               | 91.3                                                | 77.1  | 59.6  | 5.6                                                             | 4.8   | 3.7   |
|                 |              |                      | Complex with SecB     | 65.2                                                | 53.2  | 42.5  | 2.4                                                             | 1.9   | 1.5   |
|                 |              |                      | Complex with TF (Tig) | 70.3                                                | 59.4  | 45.9  | 2.9                                                             | 2.4   | 1.9   |
| P08312          | PheS         | Cytoplasm            | Monomer               | 103.5                                               | 87.4  | 67.5  | 7.6                                                             | 6.4   | 5.0   |
| P07395          | PheT         | Cytoplasm            | Monomer               | 73.8                                                | 62.3  | 48.1  | 3.3                                                             | 2.8   | 2.1   |
| P0AFJ1          | PhnA         |                      | Monomer               | 158.8                                               | 134.2 | 103.7 | 19.7                                                            | 16.7  | 12.9  |

| UniProtKB A. N. | Protein name | Subcellular location | Subunit               | $D_0 \left( \frac{\mu\text{m}^2}{\text{s}} \right)$ |       |       | $D_{\text{cyto}} \left( \frac{\mu\text{m}^2}{\text{s}} \right)$ |       |       |
|-----------------|--------------|----------------------|-----------------------|-----------------------------------------------------|-------|-------|-----------------------------------------------------------------|-------|-------|
|                 |              |                      |                       | 310 K                                               | 303 K | 293 K | 310 K                                                           | 303 K | 293 K |
| P16681          | PhnB         |                      | Monomer               | 142.9                                               | 120.7 | 93.2  | 15.7                                                            | 13.3  | 10.3  |
| P16677          | PhnC         | Cell inner membrane  | Monomer               | 113.0                                               | 95.5  | 73.7  | 9.3                                                             | 7.9   | 6.1   |
|                 |              |                      | Complex with SecB     | 70.4                                                | 57.5  | 45.9  | 2.9                                                             | 2.4   | 1.9   |
|                 |              |                      | Complex with TF (Tig) | 77.3                                                | 65.3  | 50.4  | 3.7                                                             | 3.1   | 2.4   |
| P16682          | PhnD         | Periplasm            | Monomer               | 102.9                                               | 86.9  | 67.1  | 7.5                                                             | 6.3   | 4.9   |
|                 |              |                      | Complex with SecB     | 68.3                                                | 55.8  | 44.5  | 2.7                                                             | 2.2   | 1.7   |
|                 |              |                      | Complex with TF (Tig) | 74.4                                                | 62.8  | 48.5  | 3.3                                                             | 2.8   | 2.2   |
| P16683          | PhnE         | Cell inner membrane  | Monomer               | 114.6                                               | 96.8  | 74.8  | 9.6                                                             | 8.1   | 6.3   |
|                 |              |                      | Complex with SecB     | 70.7                                                | 57.7  | 46.1  | 2.9                                                             | 2.4   | 1.9   |
|                 |              |                      | Complex with TF (Tig) | 77.7                                                | 65.6  | 50.7  | 3.7                                                             | 3.2   | 2.4   |
| P16684          | PhnF         |                      | Monomer               | 115.8                                               | 97.9  | 75.6  | 9.9                                                             | 8.3   | 6.4   |
| P16685          | PhnG         |                      | Monomer               | 141.6                                               | 119.7 | 92.4  | 15.4                                                            | 13.0  | 10.1  |
| P16686          | PhnH         |                      | Monomer               | 128.9                                               | 108.9 | 84.1  | 12.6                                                            | 10.6  | 8.2   |
| P16687          | PhnI         |                      | Monomer               | 101.3                                               | 85.6  | 66.1  | 7.2                                                             | 6.1   | 4.7   |
| P16688          | PhnJ         |                      | Monomer               | 109.6                                               | 92.6  | 71.5  | 8.7                                                             | 7.3   | 5.7   |
| P16678          | PhnK         |                      | Monomer               | 115.5                                               | 97.6  | 75.4  | 9.8                                                             | 8.3   | 6.4   |
| P16679          | PhnL         |                      | Monomer               | 121.0                                               | 102.2 | 79.0  | 10.9                                                            | 9.2   | 7.1   |
| P16689          | PhnM         |                      | Monomer               | 98.3                                                | 83.0  | 64.1  | 6.7                                                             | 5.7   | 4.4   |
| P16690          | PhnN         |                      | Monomer               | 129.6                                               | 109.5 | 84.6  | 12.7                                                            | 10.8  | 8.3   |
| P16691          | PhnO         |                      | Monomer               | 141.5                                               | 119.6 | 92.4  | 15.4                                                            | 13.0  | 10.1  |
| P16692          | PhnP         |                      | Monomer               | 115.5                                               | 97.6  | 75.4  | 9.8                                                             | 8.3   | 6.4   |
| P00634          | PhoA         | Periplasm            | Monomer               | 92.2                                                | 77.9  | 60.2  | 5.8                                                             | 4.9   | 3.8   |
|                 |              |                      | Complex with SecB     | 65.4                                                | 53.5  | 42.7  | 2.4                                                             | 1.9   | 1.6   |
|                 |              |                      | Complex with TF (Tig) | 70.6                                                | 59.7  | 46.1  | 2.9                                                             | 2.5   | 1.9   |
| P0AFJ5          | PhoB         | Cytoplasm            | Monomer               | 117.9                                               | 99.6  | 76.9  | 10.3                                                            | 8.7   | 6.7   |
| P02932          | PhoE         | Cell outer membrane  | Monomer               | 101.3                                               | 85.6  | 66.1  | 7.2                                                             | 6.1   | 4.7   |
|                 |              |                      | Complex with SecB     | 67.9                                                | 55.4  | 44.3  | 2.6                                                             | 2.1   | 1.7   |
|                 |              |                      | Complex with TF (Tig) | 73.8                                                | 62.4  | 48.2  | 3.3                                                             | 2.8   | 2.1   |
| P0A9K1          | PhoH         | Cytoplasm            | Monomer               | 100.9                                               | 85.3  | 65.9  | 7.2                                                             | 6.1   | 4.7   |
| P23836          | PhoP         | Cytoplasm            | Monomer               | 119.5                                               | 100.9 | 78.0  | 10.6                                                            | 9.0   | 6.9   |
| P23837          | PhoQ         | Cell inner membrane  | Monomer               | 88.2                                                | 74.5  | 57.6  | 5.2                                                             | 4.4   | 3.4   |

| UniProtKB A. N. | Protein name | Subcellular location | Subunit               | $D_0 \left( \frac{\mu\text{m}^2}{\text{s}} \right)$ |       |       | $D_{\text{cyto}} \left( \frac{\mu\text{m}^2}{\text{s}} \right)$ |       |       |
|-----------------|--------------|----------------------|-----------------------|-----------------------------------------------------|-------|-------|-----------------------------------------------------------------|-------|-------|
|                 |              |                      |                       | 310 K                                               | 303 K | 293 K | 310 K                                                           | 303 K | 293 K |
|                 |              |                      | Complex with SecB     | 64.2                                                | 52.5  | 41.9  | 2.3                                                             | 1.8   | 1.5   |
|                 |              |                      | Complex with TF (Tig) | 69.0                                                | 58.3  | 45.0  | 2.7                                                             | 2.3   | 1.8   |
| P08400          | PhoR         | Cell inner membrane  | Monomer               | 92.1                                                | 77.8  | 60.1  | 5.7                                                             | 4.8   | 3.7   |
|                 |              |                      | Complex with SecB     | 65.4                                                | 53.4  | 42.7  | 2.4                                                             | 1.9   | 1.6   |
|                 |              |                      | Complex with TF (Tig) | 70.6                                                | 59.6  | 46.0  | 2.9                                                             | 2.5   | 1.9   |
| P0A9K7          | PhoU         | Cytoplasm            | Monomer               | 116.2                                               | 98.2  | 75.8  | 9.9                                                             | 8.4   | 6.5   |
| P45548          | Php          |                      | Monomer               | 108.1                                               | 91.4  | 70.6  | 8.4                                                             | 7.1   | 5.5   |
| P00914          | PhrB         |                      | Monomer               | 89.3                                                | 75.4  | 58.3  | 5.3                                                             | 4.5   | 3.5   |
| P03014          | PinE         |                      | Monomer               | 130.0                                               | 109.8 | 84.8  | 12.8                                                            | 10.8  | 8.4   |
| P76611          | PinH         |                      | Monomer               | 180.6                                               | 152.5 | 117.8 | 25.7                                                            | 21.7  | 16.7  |
| P77170          | PinQ         |                      | Monomer               | 127.0                                               | 107.3 | 82.9  | 12.2                                                            | 10.3  | 7.9   |
| P0ADI0          | PinR         |                      | Monomer               | 126.9                                               | 107.2 | 82.8  | 12.1                                                            | 10.2  | 7.9   |
| P03825          | PioO         |                      | Monomer               | 143.9                                               | 121.6 | 93.9  | 16.0                                                            | 13.5  | 10.4  |
|                 |              |                      | Monomer               | 89.5                                                | 75.6  | 58.4  | 5.3                                                             | 4.5   | 3.5   |
| P0AFJ7          | PitA         | Cell inner membrane  | Complex with SecB     | 64.6                                                | 52.8  | 42.2  | 2.3                                                             | 1.9   | 1.5   |
|                 |              |                      | Complex with TF (Tig) | 69.5                                                | 58.7  | 45.4  | 2.8                                                             | 2.4   | 1.8   |
|                 |              |                      | Monomer               | 89.2                                                | 75.4  | 58.2  | 5.3                                                             | 4.5   | 3.5   |
| P43676          | PitB         | Cell inner membrane  | Complex with SecB     | 64.5                                                | 52.7  | 42.1  | 2.3                                                             | 1.9   | 1.5   |
|                 |              |                      | Complex with TF (Tig) | 69.4                                                | 58.6  | 45.3  | 2.8                                                             | 2.4   | 1.8   |
|                 |              |                      | Monomer               | 107.8                                               | 91.1  | 70.4  | 8.4                                                             | 7.1   | 5.5   |
| P0A921          | PldA         | Cell outer membrane  | Complex with SecB     | 69.3                                                | 56.6  | 45.3  | 2.8                                                             | 2.3   | 1.8   |
|                 |              |                      | Complex with TF (Tig) | 75.9                                                | 64.1  | 49.5  | 3.5                                                             | 3.0   | 2.3   |
|                 |              |                      | Monomer               | 101.2                                               | 85.5  | 66.0  | 7.2                                                             | 6.1   | 4.7   |
| P07000          | PldB         | Cell inner membrane  | Complex with SecB     | 67.9                                                | 55.4  | 44.3  | 2.6                                                             | 2.1   | 1.7   |
|                 |              |                      | Complex with TF (Tig) | 73.8                                                | 62.4  | 48.2  | 3.3                                                             | 2.8   | 2.1   |
| P0A7A7          | PlsB         | Cell inner membrane  | Monomer               | 72.5                                                | 61.2  | 47.3  | 3.1                                                             | 2.6   | 2.0   |
|                 |              |                      | Monomer               | 116.1                                               | 98.1  | 75.8  | 9.9                                                             | 8.4   | 6.5   |
| P26647          | PlsC         | Cell inner membrane  | Complex with SecB     | 70.9                                                | 57.9  | 46.3  | 3.0                                                             | 2.4   | 1.9   |
|                 |              |                      | Complex with TF (Tig) | 78.0                                                | 65.9  | 50.9  | 3.8                                                             | 3.2   | 2.5   |
|                 |              |                      | Monomer               | 102.0                                               | 86.2  | 66.6  | 7.3                                                             | 6.2   | 4.8   |
| P27247          | PlsX         | Cytoplasm            | Homodimer             | 77.7                                                | 63.5  | 50.7  | 3.8                                                             | 3.1   | 2.4   |

| UniProtKB A. N. | Protein name | Subcellular location | Subunit               | $D_0 \left( \frac{\mu\text{m}^2}{\text{s}} \right)$ |       |       | $D_{\text{cyto}} \left( \frac{\mu\text{m}^2}{\text{s}} \right)$ |       |       |
|-----------------|--------------|----------------------|-----------------------|-----------------------------------------------------|-------|-------|-----------------------------------------------------------------|-------|-------|
|                 |              |                      |                       | 310 K                                               | 303 K | 293 K | 310 K                                                           | 303 K | 293 K |
| P60782          | PlsY         | Cell inner membrane  | Monomer               | 126.2                                               | 106.6 | 82.4  | 12.0                                                            | 10.1  | 7.8   |
|                 |              |                      | Complex with SecB     | 72.5                                                | 59.2  | 47.3  | 3.1                                                             | 2.6   | 2.0   |
|                 |              |                      | Complex with TF (Tig) | 80.3                                                | 67.8  | 52.4  | 4.1                                                             | 3.4   | 2.7   |
| P0AFK0          | PmbA         | Cytoplasm            | Monomer               | 93.0                                                | 78.6  | 60.7  | 5.9                                                             | 5.0   | 3.8   |
| P37590          | PmrD         |                      | Monomer               | 173.4                                               | 146.5 | 113.2 | 23.6                                                            | 20.0  | 15.4  |
| P21369          | PncA         |                      | Monomer               | 123.7                                               | 104.5 | 80.7  | 11.5                                                            | 9.7   | 7.5   |
| P18133          | PncB         | Cytoplasm            | Monomer               | 94.9                                                | 80.2  | 61.9  | 6.2                                                             | 5.2   | 4.0   |
| P05055          | Pnp          | Cytoplasm            | Monomer               | 77.5                                                | 65.4  | 50.5  | 3.7                                                             | 3.1   | 2.4   |
|                 |              |                      | Homotrimer            | 50.4                                                | 41.1  | 32.9  | 1.1                                                             | 0.9   | 0.7   |
| P07001          | PntA         | Cell inner membrane  | Monomer               | 88.7                                                | 74.9  | 57.9  | 5.2                                                             | 4.4   | 3.4   |
|                 |              |                      | Complex with SecB     | 64.4                                                | 52.6  | 42.0  | 2.3                                                             | 1.9   | 1.5   |
|                 |              |                      | Complex with TF (Tig) | 69.2                                                | 58.5  | 45.2  | 2.8                                                             | 2.3   | 1.8   |
| P0AB67          | PntB         | Cell inner membrane  | Monomer               | 92.7                                                | 78.3  | 60.5  | 5.8                                                             | 4.9   | 3.8   |
|                 |              |                      | Complex with SecB     | 65.6                                                | 53.6  | 42.8  | 2.4                                                             | 2.0   | 1.6   |
|                 |              |                      | Complex with TF (Tig) | 70.8                                                | 59.8  | 46.2  | 2.9                                                             | 2.5   | 1.9   |
| P0AFK2          | PnuC         | Cell inner membrane  | Monomer               | 116.9                                               | 98.7  | 76.3  | 10.1                                                            | 8.5   | 6.6   |
|                 |              |                      | Complex with SecB     | 71.1                                                | 58.0  | 46.4  | 3.0                                                             | 2.4   | 1.9   |
|                 |              |                      | Complex with TF (Tig) | 78.2                                                | 66.1  | 51.0  | 3.8                                                             | 3.2   | 2.5   |
| P00582          | PolA         |                      | Monomer               | 69.1                                                | 58.4  | 45.1  | 2.8                                                             | 2.3   | 1.8   |
| P21189          | PolB         |                      | Monomer               | 72.9                                                | 61.6  | 47.6  | 3.2                                                             | 2.7   | 2.1   |
| P69874          | PotA         | Cell inner membrane  | Monomer               | 97.4                                                | 82.3  | 63.5  | 6.6                                                             | 5.6   | 4.3   |
|                 |              |                      | Complex with SecB     | 66.9                                                | 54.6  | 43.6  | 2.5                                                             | 2.1   | 1.6   |
|                 |              |                      | Complex with TF (Tig) | 72.5                                                | 61.3  | 47.3  | 3.1                                                             | 2.6   | 2.0   |
| P0AFK4          | PotB         | Cell inner membrane  | Monomer               | 110.6                                               | 93.5  | 72.2  | 8.9                                                             | 7.5   | 5.8   |
|                 |              |                      | Complex with SecB     | 69.9                                                | 57.1  | 45.6  | 2.8                                                             | 2.3   | 1.9   |
|                 |              |                      | Complex with TF (Tig) | 76.6                                                | 64.7  | 50.0  | 3.6                                                             | 3.1   | 2.4   |
| P0AFK6          | PotC         | Cell inner membrane  | Monomer               | 113.5                                               | 95.9  | 74.1  | 9.4                                                             | 8.0   | 6.2   |
|                 |              |                      | Complex with SecB     | 70.5                                                | 57.6  | 46.0  | 2.9                                                             | 2.4   | 1.9   |
|                 |              |                      | Complex with TF (Tig) | 77.4                                                | 65.4  | 50.5  | 3.7                                                             | 3.1   | 2.4   |
| P0AFK9          | PotD         | Periplasm            | Monomer               | 101.3                                               | 85.6  | 66.1  | 7.2                                                             | 6.1   | 4.7   |
|                 |              |                      | Complex with SecB     | 67.9                                                | 55.5  | 44.3  | 2.6                                                             | 2.1   | 1.7   |

| UniProtKB A. N. | Protein name | Subcellular location | Subunit               | $D_0 \left( \frac{\mu\text{m}^2}{\text{s}} \right)$ |       |       | $D_{\text{cyto}} \left( \frac{\mu\text{m}^2}{\text{s}} \right)$ |       |       |
|-----------------|--------------|----------------------|-----------------------|-----------------------------------------------------|-------|-------|-----------------------------------------------------------------|-------|-------|
|                 |              |                      |                       | 310 K                                               | 303 K | 293 K | 310 K                                                           | 303 K | 293 K |
|                 |              |                      | Complex with TF (Tig) | 73.9                                                | 62.4  | 48.2  | 3.3                                                             | 2.8   | 2.1   |
| P0AAF1          | PotE         | Cell inner membrane  | Monomer               | 94.5                                                | 79.8  | 61.6  | 6.1                                                             | 5.2   | 4.0   |
|                 |              |                      | Complex with SecB     | 66.1                                                | 54.0  | 43.1  | 2.4                                                             | 2.0   | 1.6   |
|                 |              |                      | Complex with TF (Tig) | 71.5                                                | 60.4  | 46.6  | 3.0                                                             | 2.5   | 2.0   |
| P31133          | PotF         | Periplasm            | Monomer               | 99.4                                                | 84.0  | 64.8  | 6.9                                                             | 5.8   | 4.5   |
|                 |              |                      | Complex with SecB     | 67.4                                                | 55.1  | 44.0  | 2.6                                                             | 2.1   | 1.7   |
|                 |              |                      | Complex with TF (Tig) | 73.2                                                | 61.9  | 47.8  | 3.2                                                             | 2.7   | 2.1   |
| P31134          | PotG         | Cell inner membrane  | Monomer               | 98.4                                                | 83.1  | 64.2  | 6.7                                                             | 5.7   | 4.4   |
|                 |              |                      | Complex with SecB     | 67.1                                                | 54.9  | 43.8  | 2.6                                                             | 2.1   | 1.7   |
|                 |              |                      | Complex with TF (Tig) | 72.9                                                | 61.6  | 47.5  | 3.2                                                             | 2.7   | 2.1   |
| P31135          | PotH         | Cell inner membrane  | Monomer               | 105.0                                               | 88.7  | 68.5  | 7.9                                                             | 6.6   | 5.1   |
|                 |              |                      | Complex with SecB     | 68.7                                                | 56.2  | 44.9  | 2.7                                                             | 2.2   | 1.8   |
|                 |              |                      | Complex with TF (Tig) | 75.0                                                | 63.4  | 49.0  | 3.4                                                             | 2.9   | 2.2   |
| P0AFL1          | PotI         | Cell inner membrane  | Monomer               | 111.4                                               | 94.1  | 72.7  | 9.0                                                             | 7.6   | 5.9   |
|                 |              |                      | Complex with SecB     | 70.1                                                | 57.2  | 45.7  | 2.9                                                             | 2.3   | 1.9   |
|                 |              |                      | Complex with TF (Tig) | 76.8                                                | 64.9  | 50.1  | 3.6                                                             | 3.1   | 2.4   |
| P0A8N7          | PoxA         |                      | Monomer               | 103.3                                               | 87.3  | 67.4  | 7.6                                                             | 6.4   | 4.9   |
| P07003          | PoxB         | Cell membrane        | Monomer               | 84.4                                                | 71.3  | 55.1  | 4.6                                                             | 3.9   | 3.0   |
|                 |              |                      | Complex with SecB     | 62.9                                                | 51.4  | 41.1  | 2.1                                                             | 1.7   | 1.4   |
|                 |              |                      | Complex with TF (Tig) | 67.3                                                | 56.9  | 43.9  | 2.6                                                             | 2.2   | 1.7   |
| P0A7A9          | Ppa          | Cytoplasm            | Monomer               | 132.2                                               | 111.7 | 86.3  | 13.3                                                            | 11.2  | 8.7   |
|                 |              |                      | Homohexamer           | 65.5                                                | 53.5  | 42.8  | 2.4                                                             | 2.0   | 1.6   |
| P00864          | Ppc          |                      | Monomer               | 70.2                                                | 59.3  | 45.8  | 2.9                                                             | 2.4   | 1.9   |
|                 |              |                      | Homotetramer          | 40.8                                                | 33.3  | 26.6  | 0.6                                                             | 0.5   | 0.4   |
| P33554          | PpdA         |                      | Monomer               | 137.4                                               | 116.1 | 89.7  | 14.5                                                            | 12.2  | 9.4   |
| P08371          | PpdB         |                      | Monomer               | 130.2                                               | 110.0 | 84.9  | 12.8                                                            | 10.8  | 8.4   |
| P08372          | PpdC         |                      | Monomer               | 160.6                                               | 135.7 | 104.8 | 20.2                                                            | 17.0  | 13.2  |
| P36647          | PpdD         | Fimbrium             | Monomer               | 144.8                                               | 122.4 | 94.5  | 16.2                                                            | 13.7  | 10.6  |
|                 |              |                      | Complex with SecB     | 74.7                                                | 61.0  | 48.7  | 3.4                                                             | 2.8   | 2.2   |
|                 |              |                      | Complex with TF (Tig) | 83.4                                                | 70.5  | 54.4  | 4.5                                                             | 3.8   | 2.9   |
| P55798          | PphA         |                      | Monomer               | 119.9                                               | 101.3 | 78.3  | 10.7                                                            | 9.0   | 7.0   |

| UniProtKB A. N. | Protein name | Subcellular location | Subunit               | $D_0 \left( \frac{\mu\text{m}^2}{\text{s}} \right)$ |       |       | $D_{\text{cyto}} \left( \frac{\mu\text{m}^2}{\text{s}} \right)$ |       |       |
|-----------------|--------------|----------------------|-----------------------|-----------------------------------------------------|-------|-------|-----------------------------------------------------------------|-------|-------|
|                 |              |                      |                       | 310 K                                               | 303 K | 293 K | 310 K                                                           | 303 K | 293 K |
| P55799          | PphB         |                      | Monomer               | 120.3                                               | 101.6 | 78.5  | 10.8                                                            | 9.1   | 7.0   |
| P0AFL3          | PpiA         | Periplasm            | Monomer               | 130.4                                               | 110.1 | 85.1  | 12.9                                                            | 10.9  | 8.4   |
|                 |              |                      | Complex with SecB     | 73.1                                                | 59.7  | 47.7  | 3.2                                                             | 2.6   | 2.1   |
|                 |              |                      | Complex with TF (Tig) | 81.1                                                | 68.5  | 52.9  | 4.2                                                             | 3.5   | 2.7   |
| P23869          | PpiB         | Cytoplasm            | Monomer               | 136.6                                               | 115.4 | 89.1  | 14.3                                                            | 12.1  | 9.3   |
| P0A9L5          | PpiC         | Cytoplasm            | Monomer               | 171.0                                               | 144.4 | 111.6 | 23.0                                                            | 19.4  | 15.0  |
| P0ADY1          | PpiD         | Cell inner membrane  | Monomer               | 81.3                                                | 68.7  | 53.1  | 4.2                                                             | 3.6   | 2.7   |
|                 |              |                      | Complex with SecB     | 61.8                                                | 50.5  | 40.3  | 2.0                                                             | 1.7   | 1.3   |
|                 |              |                      | Complex with TF (Tig) | 65.9                                                | 55.7  | 43.0  | 2.4                                                             | 2.1   | 1.6   |
| P0A7B1          | Ppk          | Cell inner membrane  | Monomer               | 76.2                                                | 64.4  | 49.7  | 3.6                                                             | 3.0   | 2.3   |
|                 |              |                      | Complex with SecB     | 59.7                                                | 48.8  | 39.0  | 1.9                                                             | 1.5   | 1.2   |
|                 |              |                      | Complex with TF (Tig) | 63.4                                                | 53.5  | 41.4  | 2.2                                                             | 1.8   | 1.4   |
| P0A7B3          | PpnK         | Cytoplasm            | Monomer               | 108.6                                               | 91.7  | 70.9  | 8.5                                                             | 7.2   | 5.6   |
| Q46836          | PppA         | Cell inner membrane  | Monomer               | 112.9                                               | 95.4  | 73.7  | 9.3                                                             | 7.9   | 6.1   |
|                 |              |                      | Complex with SecB     | 70.4                                                | 57.5  | 45.9  | 2.9                                                             | 2.4   | 1.9   |
|                 |              |                      | Complex with TF (Tig) | 77.2                                                | 65.3  | 50.4  | 3.7                                                             | 3.1   | 2.4   |
| P23538          | PpsA         |                      | Monomer               | 73.7                                                | 62.3  | 48.1  | 3.3                                                             | 2.8   | 2.1   |
|                 |              |                      | Homodimer             | 56.2                                                | 45.9  | 36.7  | 1.6                                                             | 1.3   | 1.0   |
| P31992          | PptA         | Cytoplasm            | Monomer               | 182.4                                               | 154.1 | 119.0 | 26.2                                                            | 22.1  | 17.1  |
|                 |              |                      | Homodimer             | 139.0                                               | 113.6 | 90.7  | 14.8                                                            | 12.1  | 9.7   |
| P0AFL6          | Ppx          | Cell membrane        | Monomer               | 86.5                                                | 73.1  | 56.5  | 4.9                                                             | 4.2   | 3.2   |
|                 |              |                      | Complex with SecB     | 63.7                                                | 52.0  | 41.5  | 2.2                                                             | 1.8   | 1.4   |
|                 |              |                      | Complex with TF (Tig) | 68.3                                                | 57.7  | 44.6  | 2.7                                                             | 2.3   | 1.7   |
| P0AFL9          | PqiA         | Cell inner membrane  | Monomer               | 94.5                                                | 79.8  | 61.7  | 6.1                                                             | 5.2   | 4.0   |
|                 |              |                      | Complex with SecB     | 66.1                                                | 54.0  | 43.1  | 2.4                                                             | 2.0   | 1.6   |
|                 |              |                      | Complex with TF (Tig) | 71.5                                                | 60.4  | 46.6  | 3.0                                                             | 2.5   | 2.0   |
| P43671          | PqiB         | Cell membrane        | Monomer               | 85.2                                                | 72.0  | 55.6  | 4.7                                                             | 4.0   | 3.1   |
|                 |              |                      | Complex with SecB     | 63.2                                                | 51.6  | 41.2  | 2.2                                                             | 1.8   | 1.4   |
|                 |              |                      | Complex with TF (Tig) | 67.7                                                | 57.2  | 44.2  | 2.6                                                             | 2.2   | 1.7   |
| P31828          | PqqL         |                      | Monomer               | 68.7                                                | 58.1  | 44.8  | 2.7                                                             | 2.3   | 1.8   |
| P23865          | Prc          | Cell inner membrane  | Monomer               | 77.6                                                | 65.6  | 50.7  | 3.7                                                             | 3.2   | 2.4   |



| UniProtKB A. N. | Protein name | Subcellular location | Subunit               | $D_0 \left( \frac{\mu\text{m}^2}{\text{s}} \right)$ |       |       | $D_{\text{cyto}} \left( \frac{\mu\text{m}^2}{\text{s}} \right)$ |       |       |
|-----------------|--------------|----------------------|-----------------------|-----------------------------------------------------|-------|-------|-----------------------------------------------------------------|-------|-------|
|                 |              |                      |                       | 310 K                                               | 303 K | 293 K | 310 K                                                           | 303 K | 293 K |
|                 |              |                      | Complex with SecB     | 60.3                                                | 49.3  | 39.4  | 1.9                                                             | 1.6   | 1.2   |
|                 |              |                      | Complex with TF (Tig) | 64.1                                                | 54.2  | 41.8  | 2.3                                                             | 1.9   | 1.5   |
| P0A7I0          | PrfA         | Cytoplasm            | Monomer               | 99.7                                                | 84.2  | 65.1  | 7.0                                                             | 5.9   | 4.5   |
| P07012          | PrfB         | Cytoplasm            | Monomer               | 99.0                                                | 83.6  | 64.6  | 6.8                                                             | 5.8   | 4.5   |
| P0A7I4          | PrfC         | Cytoplasm            | Monomer               | 85.7                                                | 72.4  | 55.9  | 4.8                                                             | 4.1   | 3.1   |
| P28369          | PrfH         |                      | Monomer               | 134.6                                               | 113.7 | 87.8  | 13.8                                                            | 11.7  | 9.0   |
| P17888          | PriA         |                      | Monomer               | 75.7                                                | 64.0  | 49.4  | 3.5                                                             | 3.0   | 2.3   |
| P07013          | PriB         |                      | Monomer               | 163.6                                               | 138.2 | 106.8 | 21.0                                                            | 17.7  | 13.7  |
| P23862          | PriC         |                      | Monomer               | 130.5                                               | 110.3 | 85.2  | 12.9                                                            | 10.9  | 8.4   |
| P0AEX5          | PrkB         |                      | Monomer               | 108.9                                               | 92.0  | 71.1  | 8.6                                                             | 7.2   | 5.6   |
| P27298          | PrlC         |                      | Monomer               | 77.4                                                | 65.4  | 50.5  | 3.7                                                             | 3.1   | 2.4   |
| P0A8T1          | PrmA         | Cytoplasm            | Monomer               | 109.5                                               | 92.5  | 71.5  | 8.7                                                             | 7.3   | 5.7   |
| P07004          | ProA         | Cytoplasm            | Monomer               | 96.0                                                | 81.1  | 62.6  | 6.4                                                             | 5.4   | 4.1   |
| P0A7B5          | ProB         | Cytoplasm            | Monomer               | 101.1                                               | 85.4  | 66.0  | 7.2                                                             | 6.1   | 4.7   |
| P0A9L8          | ProC         | Cytoplasm            | Monomer               | 115.0                                               | 97.1  | 75.0  | 9.7                                                             | 8.2   | 6.3   |
|                 |              |                      | Monomer               | 88.5                                                | 74.8  | 57.8  | 5.2                                                             | 4.4   | 3.4   |
| P0C0L7          | ProP         | Cell inner membrane  | Complex with SecB     | 64.3                                                | 52.5  | 42.0  | 2.3                                                             | 1.9   | 1.5   |
|                 |              |                      | Complex with TF (Tig) | 69.1                                                | 58.4  | 45.1  | 2.8                                                             | 2.3   | 1.8   |
| P45577          | ProQ         | Cytoplasm            | Monomer               | 118.8                                               | 100.4 | 77.5  | 10.5                                                            | 8.8   | 6.8   |
|                 |              |                      | Monomer               | 83.5                                                | 70.5  | 54.5  | 4.5                                                             | 3.8   | 2.9   |
| P16659          | ProS         | Cytoplasm            | Homodimer             | 63.6                                                | 52.0  | 41.5  | 2.2                                                             | 1.8   | 1.4   |
|                 |              |                      | Monomer               | 96.4                                                | 81.4  | 62.9  | 6.4                                                             | 5.4   | 4.2   |
| P14175          | ProV         | Cell inner membrane  | Complex with SecB     | 66.6                                                | 54.4  | 43.5  | 2.5                                                             | 2.0   | 1.6   |
|                 |              |                      | Complex with TF (Tig) | 72.2                                                | 61.0  | 47.1  | 3.1                                                             | 2.6   | 2.0   |
|                 |              |                      | Monomer               | 102.6                                               | 86.7  | 67.0  | 7.5                                                             | 6.3   | 4.9   |
| P14176          | ProW         | Cell inner membrane  | Complex with SecB     | 68.2                                                | 55.7  | 44.5  | 2.7                                                             | 2.2   | 1.7   |
|                 |              |                      | Complex with TF (Tig) | 74.3                                                | 62.8  | 48.5  | 3.3                                                             | 2.8   | 2.2   |
|                 |              |                      | Monomer               | 104.4                                               | 88.2  | 68.1  | 7.8                                                             | 6.6   | 5.1   |
| P0AFM2          | ProX         | Periplasm            | Complex with SecB     | 68.6                                                | 56.0  | 44.8  | 2.7                                                             | 2.2   | 1.8   |
|                 |              |                      | Complex with TF (Tig) | 74.8                                                | 63.2  | 48.8  | 3.4                                                             | 2.9   | 2.2   |
|                 |              |                      | Monomer               | 91.6                                                | 77.4  | 59.8  | 5.7                                                             | 4.8   | 3.7   |
| P0AAE2          | ProY         | Cell inner membrane  |                       |                                                     |       |       |                                                                 |       |       |

| UniProtKB A. N. | Protein name | Subcellular location           | Subunit               | $D_0 \left( \frac{\mu\text{m}^2}{\text{s}} \right)$ |       |       | $D_{\text{cyto}} \left( \frac{\mu\text{m}^2}{\text{s}} \right)$ |       |       |
|-----------------|--------------|--------------------------------|-----------------------|-----------------------------------------------------|-------|-------|-----------------------------------------------------------------|-------|-------|
|                 |              |                                |                       | 310 K                                               | 303 K | 293 K | 310 K                                                           | 303 K | 293 K |
|                 |              |                                | Complex with SecB     | 65.3                                                | 53.3  | 42.6  | 2.4                                                             | 1.9   | 1.5   |
|                 |              |                                | Complex with TF (Tig) | 70.4                                                | 59.5  | 45.9  | 2.9                                                             | 2.4   | 1.9   |
| P77541          | PrpB         |                                | Monomer               | 109.2                                               | 92.2  | 71.2  | 8.6                                                             | 7.3   | 5.6   |
| P31660          | PrpC         |                                | Monomer               | 97.3                                                | 82.2  | 63.5  | 6.6                                                             | 5.5   | 4.3   |
|                 |              |                                | Homodimer             | 74.1                                                | 60.6  | 48.4  | 3.3                                                             | 2.7   | 2.2   |
| P77243          | PrpD         |                                | Monomer               | 89.1                                                | 75.3  | 58.1  | 5.3                                                             | 4.5   | 3.5   |
| P77495          | PrpE         |                                | Monomer               | 80.7                                                | 68.2  | 52.7  | 4.1                                                             | 3.5   | 2.7   |
| P77743          | PrpR         |                                | Monomer               | 86.2                                                | 72.9  | 56.3  | 4.9                                                             | 4.1   | 3.2   |
|                 |              |                                | Monomer               | 91.2                                                | 77.1  | 59.5  | 5.6                                                             | 4.7   | 3.7   |
| P0A717          | Prs          | Cytoplasm                      | Homotetramer          | 53.0                                                | 43.3  | 34.6  | 1.3                                                             | 1.1   | 0.9   |
|                 |              |                                | Monomer               | 106.5                                               | 90.0  | 69.5  | 8.1                                                             | 6.9   | 5.3   |
| P0A8K1          | Psd          | Cell membrane                  | Monomer               | 104.5                                               | 88.3  | 68.2  | 7.8                                                             | 6.6   | 5.1   |
|                 |              |                                | Complex with SecB     | 68.6                                                | 56.1  | 44.8  | 2.7                                                             | 2.2   | 1.8   |
|                 |              |                                | Complex with TF (Tig) | 74.9                                                | 63.2  | 48.9  | 3.4                                                             | 2.9   | 2.2   |
| P36678          | PshM         | Cell inner membrane            | Monomer               | 139.4                                               | 117.7 | 90.9  | 14.9                                                            | 12.6  | 9.7   |
|                 |              |                                | Complex with SecB     | 74.1                                                | 60.5  | 48.4  | 3.3                                                             | 2.7   | 2.2   |
|                 |              |                                | Complex with TF (Tig) | 82.6                                                | 69.8  | 53.9  | 4.4                                                             | 3.7   | 2.9   |
| P0A7C8          | PsiE         | Cell inner membrane            | Monomer               | 144.9                                               | 122.4 | 94.6  | 16.2                                                            | 13.7  | 10.6  |
|                 |              |                                | Complex with SecB     | 74.7                                                | 61.0  | 48.7  | 3.4                                                             | 2.8   | 2.2   |
|                 |              |                                | Complex with TF (Tig) | 83.4                                                | 70.5  | 54.4  | 4.5                                                             | 3.8   | 2.9   |
| P0AFM4          | PsiF         |                                | Monomer               | 162.3                                               | 137.1 | 105.9 | 20.6                                                            | 17.4  | 13.5  |
| P0AFM6          | PspA         | Cytoplasm. Cell inner membrane | Monomer               | 119.5                                               | 101.0 | 78.0  | 10.6                                                            | 9.0   | 6.9   |
| P0AFM9          | PspB         | Cell inner membrane            | Monomer               | 181.7                                               | 153.5 | 118.6 | 26.0                                                            | 21.9  | 17.0  |
|                 |              |                                | Complex with SecB     | 77.2                                                | 63.0  | 50.4  | 3.7                                                             | 3.0   | 2.4   |
|                 |              |                                | Complex with TF (Tig) | 87.2                                                | 73.7  | 56.9  | 5.0                                                             | 4.2   | 3.3   |
| P0AFN2          | PspC         | Cell inner membrane            | Monomer               | 153.3                                               | 129.5 | 100.0 | 18.3                                                            | 15.5  | 11.9  |
|                 |              |                                | Complex with SecB     | 75.4                                                | 61.6  | 49.2  | 3.5                                                             | 2.8   | 2.3   |
|                 |              |                                | Complex with TF (Tig) | 84.5                                                | 71.4  | 55.2  | 4.6                                                             | 3.9   | 3.0   |
| P0AFV8          | PspD         | Cytoplasm. Cell inner membrane | Monomer               | 187.9                                               | 158.7 | 122.6 | 27.8                                                            | 23.5  | 18.1  |

| UniProtKB A. N. | Protein name | Subcellular location           | Subunit               | $D_0 \left( \frac{\mu\text{m}^2}{\text{s}} \right)$ |       |       | $D_{\text{cyto}} \left( \frac{\mu\text{m}^2}{\text{s}} \right)$ |       |       |
|-----------------|--------------|--------------------------------|-----------------------|-----------------------------------------------------|-------|-------|-----------------------------------------------------------------|-------|-------|
|                 |              |                                |                       | 310 K                                               | 303 K | 293 K | 310 K                                                           | 303 K | 293 K |
| P23857          | PspE         | Periplasm                      | Monomer               | 163.5                                               | 138.1 | 106.7 | 20.9                                                            | 17.7  | 13.7  |
|                 |              |                                | Complex with SecB     | 76.1                                                | 62.2  | 49.7  | 3.6                                                             | 2.9   | 2.3   |
|                 |              |                                | Complex with TF (Tig) | 85.7                                                | 72.4  | 55.9  | 4.8                                                             | 4.1   | 3.1   |
| P37344          | PspF         | Cytoplasm                      | Monomer               | 103.3                                               | 87.3  | 67.4  | 7.6                                                             | 6.4   | 4.9   |
| P32696          | PspG         | Cell inner membrane            | Monomer               | 179.6                                               | 151.7 | 117.2 | 25.4                                                            | 21.4  | 16.6  |
|                 |              |                                | Complex with SecB     | 77.1                                                | 63.0  | 50.3  | 3.7                                                             | 3.0   | 2.4   |
|                 |              |                                | Complex with TF (Tig) | 87.1                                                | 73.6  | 56.8  | 5.0                                                             | 4.2   | 3.3   |
| P23830          | PssA         | Cytoplasm. Cell inner membrane | Monomer               | 89.9                                                | 75.9  | 58.6  | 5.4                                                             | 4.6   | 3.5   |
| P07654          | PstA         | Cell inner membrane            | Monomer               | 108.9                                               | 92.0  | 71.1  | 8.6                                                             | 7.2   | 5.6   |
|                 |              |                                | Complex with SecB     | 69.6                                                | 56.8  | 45.4  | 2.8                                                             | 2.3   | 1.8   |
|                 |              |                                | Complex with TF (Tig) | 76.2                                                | 64.3  | 49.7  | 3.6                                                             | 3.0   | 2.3   |
| P0AAH0          | PstB         | Cell inner membrane            | Monomer               | 113.6                                               | 96.0  | 74.1  | 9.5                                                             | 8.0   | 6.2   |
|                 |              |                                | Complex with SecB     | 70.5                                                | 57.6  | 46.0  | 2.9                                                             | 2.4   | 1.9   |
|                 |              |                                | Complex with TF (Tig) | 77.4                                                | 65.4  | 50.5  | 3.7                                                             | 3.1   | 2.4   |
| P0AGH8          | PstC         | Cell inner membrane            | Monomer               | 106.6                                               | 90.1  | 69.6  | 8.2                                                             | 6.9   | 5.3   |
|                 |              |                                | Complex with SecB     | 69.1                                                | 56.4  | 45.1  | 2.8                                                             | 2.3   | 1.8   |
|                 |              |                                | Complex with TF (Tig) | 75.5                                                | 63.8  | 49.3  | 3.5                                                             | 2.9   | 2.3   |
| P0AG82          | PstS         | Periplasm                      | Monomer               | 103.3                                               | 87.2  | 67.4  | 7.6                                                             | 6.4   | 4.9   |
|                 |              |                                | Complex with SecB     | 68.3                                                | 55.8  | 44.6  | 2.7                                                             | 2.2   | 1.7   |
|                 |              |                                | Complex with TF (Tig) | 74.5                                                | 62.9  | 48.6  | 3.4                                                             | 2.8   | 2.2   |
| P33025          | PsuG         |                                | Monomer               | 108.2                                               | 91.4  | 70.6  | 8.4                                                             | 7.1   | 5.5   |
| P30235          | PsuK         |                                | Monomer               | 107.3                                               | 90.7  | 70.0  | 8.3                                                             | 7.0   | 5.4   |
| P33024          | PsuT         | Cell inner membrane            | Monomer               | 97.0                                                | 82.0  | 63.3  | 6.5                                                             | 5.5   | 4.3   |
|                 |              |                                | Complex with SecB     | 66.8                                                | 54.6  | 43.6  | 2.5                                                             | 2.1   | 1.6   |
|                 |              |                                | Complex with TF (Tig) | 72.4                                                | 61.2  | 47.2  | 3.1                                                             | 2.6   | 2.0   |
| P0A9M8          | Pta          | Cytoplasm                      | Monomer               | 77.4                                                | 65.4  | 50.5  | 3.7                                                             | 3.1   | 2.4   |
|                 |              |                                | Homohexamer           | 38.4                                                | 31.3  | 25.0  | 0.5                                                             | 0.4   | 0.3   |
| P0A7D1          | Pth          | Cytoplasm                      | Monomer               | 128.8                                               | 108.8 | 84.0  | 12.5                                                            | 10.6  | 8.2   |
| P05458          | PtrA         | Periplasm                      | Monomer               | 68.0                                                | 57.4  | 44.3  | 2.6                                                             | 2.2   | 1.7   |
|                 |              |                                | Complex with SecB     | 56.0                                                | 45.7  | 36.5  | 1.5                                                             | 1.3   | 1.0   |

| UniProtKB A. N. | Protein name | Subcellular location | Subunit               | $D_0 \left( \frac{\mu\text{m}^2}{\text{s}} \right)$ |       |       | $D_{\text{cyto}} \left( \frac{\mu\text{m}^2}{\text{s}} \right)$ |       |       |
|-----------------|--------------|----------------------|-----------------------|-----------------------------------------------------|-------|-------|-----------------------------------------------------------------|-------|-------|
|                 |              |                      |                       | 310 K                                               | 303 K | 293 K | 310 K                                                           | 303 K | 293 K |
|                 |              |                      | Complex with TF (Tig) | 58.8                                                | 49.7  | 38.4  | 1.8                                                             | 1.5   | 1.2   |
| P24555          | PtrB         |                      | Monomer               | 76.5                                                | 64.7  | 49.9  | 3.6                                                             | 3.0   | 2.4   |
| P32670          | PtsA         | Cytoplasm            | Monomer               | 72.4                                                | 61.1  | 47.2  | 3.1                                                             | 2.6   | 2.0   |
|                 |              |                      | Monomer               | 91.3                                                | 77.1  | 59.6  | 5.6                                                             | 4.8   | 3.7   |
| P69786          | PtsG         | Cell inner membrane  | Complex with SecB     | 65.2                                                | 53.2  | 42.5  | 2.4                                                             | 1.9   | 1.5   |
|                 |              |                      | Complex with TF (Tig) | 70.3                                                | 59.4  | 45.9  | 2.9                                                             | 2.4   | 1.9   |
| P0AA04          | PtsH         | Cytoplasm            | Monomer               | 178.9                                               | 151.1 | 116.7 | 25.2                                                            | 21.3  | 16.4  |
|                 |              |                      | Monomer               | 83.6                                                | 70.6  | 54.5  | 4.5                                                             | 3.8   | 2.9   |
| P08839          | PtsI         | Cytoplasm            | Homodimer             | 63.7                                                | 52.0  | 41.6  | 2.2                                                             | 1.8   | 1.4   |
| P69829          | PtsN         | Cytoplasm            | Monomer               | 137.1                                               | 115.9 | 89.5  | 14.4                                                            | 12.2  | 9.4   |
| P0A9N0          | PtsO         | Cytoplasm            | Monomer               | 173.8                                               | 146.8 | 113.4 | 23.7                                                            | 20.1  | 15.5  |
| P37177          | PtsP         | Cytoplasm            | Monomer               | 75.0                                                | 63.4  | 48.9  | 3.4                                                             | 2.9   | 2.2   |
|                 |              |                      | Monomer               | 93.8                                                | 79.2  | 61.2  | 6.0                                                             | 5.1   | 3.9   |
| P0A7D4          | PurA         | Cytoplasm            | Homodimer             | 71.5                                                | 58.4  | 46.6  | 3.0                                                             | 2.5   | 2.0   |
| P0AB89          | PurB         |                      | Monomer               | 90.7                                                | 76.6  | 59.2  | 5.5                                                             | 4.7   | 3.6   |
|                 |              |                      | Monomer               | 116.9                                               | 98.7  | 76.3  | 10.1                                                            | 8.5   | 6.6   |
| P0A7D7          | PurC         |                      | Homotrimer            | 76.0                                                | 62.1  | 49.6  | 3.5                                                             | 2.9   | 2.3   |
| P15640          | PurD         |                      | Monomer               | 94.9                                                | 80.2  | 61.9  | 6.2                                                             | 5.2   | 4.0   |
|                 |              |                      | Monomer               | 137.7                                               | 116.3 | 89.8  | 14.5                                                            | 12.3  | 9.5   |
| P0AG18          | PurE         |                      | Homoctamer            | 60.9                                                | 49.8  | 39.8  | 2.0                                                             | 1.6   | 1.3   |
|                 |              |                      | Monomer               | 87.5                                                | 73.9  | 57.1  | 5.1                                                             | 4.3   | 3.3   |
| P0AG16          | PurF         |                      | Homotetramer          | 50.8                                                | 41.5  | 33.2  | 1.2                                                             | 1.0   | 0.8   |
| P15639          | PurH         |                      | Monomer               | 87.0                                                | 73.5  | 56.8  | 5.0                                                             | 4.2   | 3.3   |
|                 |              |                      | Monomer               | 100.7                                               | 85.1  | 65.7  | 7.1                                                             | 6.0   | 4.7   |
| P09029          | PurK         |                      | Homodimer             | 76.8                                                | 62.7  | 50.1  | 3.6                                                             | 3.0   | 2.4   |
| P15254          | PurL         | Cytoplasm            | Monomer               | 61.1                                                | 51.6  | 39.9  | 2.0                                                             | 1.7   | 1.3   |
|                 |              |                      | Monomer               | 103.5                                               | 87.4  | 67.5  | 7.6                                                             | 6.4   | 5.0   |
| P08178          | PurM         | Cytoplasm            | Homodimer             | 78.8                                                | 64.4  | 51.4  | 3.9                                                             | 3.2   | 2.5   |
|                 |              |                      | Monomer               | 124.0                                               | 104.7 | 80.9  | 11.5                                                            | 9.7   | 7.5   |
| P08179          | PurN         |                      | Homodimer             | 94.5                                                | 77.2  | 61.6  | 6.1                                                             | 5.0   | 4.0   |
|                 |              |                      | Monomer               | 94.2                                                | 79.5  | 61.4  | 6.1                                                             | 5.1   | 4.0   |
| P31466          | PurP         | Cell inner membrane  |                       |                                                     |       |       |                                                                 |       |       |

| UniProtKB A. N. | Protein name | Subcellular location | Subunit                                                 | $D_0 \left( \frac{\mu\text{m}^2}{\text{s}} \right)$ |       |       | $D_{\text{cyto}} \left( \frac{\mu\text{m}^2}{\text{s}} \right)$ |       |       |
|-----------------|--------------|----------------------|---------------------------------------------------------|-----------------------------------------------------|-------|-------|-----------------------------------------------------------------|-------|-------|
|                 |              |                      |                                                         | 310 K                                               | 303 K | 293 K | 310 K                                                           | 303 K | 293 K |
|                 |              |                      | Complex with SecB                                       | 66.0                                                | 53.9  | 43.1  | 2.4                                                             | 2.0   | 1.6   |
|                 |              |                      | Complex with TF (Tig)                                   | 71.4                                                | 60.3  | 46.6  | 3.0                                                             | 2.5   | 2.0   |
| P0ACP7          | PurR         |                      | Monomer                                                 | 102.0                                               | 86.2  | 66.6  | 7.4                                                             | 6.2   | 4.8   |
|                 |              |                      | Homodimer                                               | 77.8                                                | 63.5  | 50.7  | 3.8                                                             | 3.1   | 2.5   |
| P33221          | PurT         |                      | Monomer                                                 | 97.9                                                | 82.7  | 63.9  | 6.7                                                             | 5.6   | 4.3   |
|                 |              |                      | Homodimer                                               | 74.6                                                | 60.9  | 48.7  | 3.4                                                             | 2.8   | 2.2   |
| P37051          | PurU         |                      | Monomer                                                 | 109.4                                               | 92.5  | 71.4  | 8.7                                                             | 7.3   | 5.7   |
|                 |              |                      | Homoheptamer                                            | 54.2                                                | 44.3  | 35.4  | 1.4                                                             | 1.1   | 0.9   |
| P09546          | PutA         |                      | Monomer                                                 | 60.7                                                | 51.3  | 39.6  | 1.9                                                             | 1.6   | 1.3   |
|                 |              |                      | Homodimer                                               | 46.2                                                | 37.8  | 30.2  | 0.9                                                             | 0.7   | 0.6   |
| P07117          | PutP         | Cell inner membrane  | Monomer                                                 | 88.8                                                | 75.1  | 58.0  | 5.3                                                             | 4.4   | 3.4   |
|                 |              |                      | Complex with SecB                                       | 64.4                                                | 52.6  | 42.0  | 2.3                                                             | 1.9   | 1.5   |
|                 |              |                      | Complex with TF (Tig)                                   | 69.3                                                | 58.5  | 45.2  | 2.8                                                             | 2.3   | 1.8   |
| P78061          | PuuA         |                      | Monomer                                                 | 89.6                                                | 75.7  | 58.5  | 5.4                                                             | 4.5   | 3.5   |
| P37906          | PuuB         |                      | Monomer                                                 | 93.9                                                | 79.3  | 61.3  | 6.0                                                             | 5.1   | 3.9   |
| P23883          | PuuC         |                      | Monomer                                                 | 89.4                                                | 75.6  | 58.4  | 5.3                                                             | 4.5   | 3.5   |
| P76038          | PuuD         |                      | Monomer                                                 | 115.2                                               | 97.3  | 75.2  | 9.8                                                             | 8.2   | 6.4   |
|                 |              |                      | Homodimer                                               | 87.8                                                | 71.7  | 57.3  | 5.1                                                             | 4.2   | 3.3   |
| P50457          | PuuE         |                      | Monomer                                                 | 95.9                                                | 81.0  | 62.6  | 6.3                                                             | 5.4   | 4.1   |
| P76037          | PuuP         | Cell inner membrane  | Monomer                                                 | 91.2                                                | 77.0  | 59.5  | 5.6                                                             | 4.7   | 3.7   |
|                 |              |                      | Complex with SecB                                       | 65.1                                                | 53.2  | 42.5  | 2.4                                                             | 1.9   | 1.5   |
|                 |              |                      | Complex with TF (Tig)                                   | 70.2                                                | 59.3  | 45.8  | 2.9                                                             | 2.4   | 1.9   |
| P0A9U6          | PuuR         |                      | Monomer                                                 | 131.2                                               | 110.9 | 85.6  | 13.1                                                            | 11.0  | 8.5   |
| P21599          | PykA         |                      | Monomer                                                 | 90.8                                                | 76.7  | 59.3  | 5.6                                                             | 4.7   | 3.6   |
|                 |              |                      | Homotetramer                                            | 52.8                                                | 43.1  | 34.4  | 1.3                                                             | 1.1   | 0.8   |
| P0AD61          | PykF         |                      | Monomer                                                 | 91.3                                                | 77.1  | 59.6  | 5.6                                                             | 4.7   | 3.7   |
|                 |              |                      | Homotetramer                                            | 53.0                                                | 43.3  | 34.6  | 1.3                                                             | 1.1   | 0.9   |
| P0A786          | PyrB         |                      | Monomer                                                 | 106.3                                               | 89.8  | 69.3  | 8.1                                                             | 6.8   | 5.3   |
|                 |              |                      | Heterododecamer (PyrB <sub>6</sub> -PyrI <sub>6</sub> ) | 44.9                                                | 38.0  | 29.3  | 0.8                                                             | 0.7   | 0.5   |
| P05020          | PyrC         |                      | Monomer                                                 | 101.4                                               | 85.6  | 66.1  | 7.2                                                             | 6.1   | 4.7   |
|                 |              |                      | Homodimer                                               | 77.2                                                | 63.1  | 50.4  | 3.7                                                             | 3.0   | 2.4   |

| UniProtKB A. N. | Protein name | Subcellular location | Subunit                                                 | $D_0 \left( \frac{\mu\text{m}^2}{\text{s}} \right)$ |       |       | $D_{\text{cyto}} \left( \frac{\mu\text{m}^2}{\text{s}} \right)$ |       |       |
|-----------------|--------------|----------------------|---------------------------------------------------------|-----------------------------------------------------|-------|-------|-----------------------------------------------------------------|-------|-------|
|                 |              |                      |                                                         | 310 K                                               | 303 K | 293 K | 310 K                                                           | 303 K | 293 K |
| P0A7E1          | PyrD         | Cell membrane        | Monomer                                                 | 103.5                                               | 87.5  | 67.6  | 7.6                                                             | 6.4   | 5.0   |
|                 |              |                      | Complex with SecB                                       | 68.4                                                | 55.9  | 44.6  | 2.7                                                             | 2.2   | 1.8   |
|                 |              |                      | Complex with TF (Tig)                                   | 74.6                                                | 63.0  | 48.7  | 3.4                                                             | 2.8   | 2.2   |
| P0A7E3          | PyrE         |                      | Monomer                                                 | 123.3                                               | 104.1 | 80.4  | 11.4                                                            | 9.6   | 7.4   |
|                 |              |                      | Homodimer                                               | 93.9                                                | 76.7  | 61.3  | 6.0                                                             | 4.9   | 3.9   |
| P08244          | PyrF         |                      | Monomer                                                 | 118.0                                               | 99.7  | 77.0  | 10.3                                                            | 8.7   | 6.7   |
|                 |              |                      | Homodimer                                               | 89.9                                                | 73.5  | 58.7  | 5.4                                                             | 4.4   | 3.5   |
| P0A7E5          | PyrG         |                      | Monomer                                                 | 85.3                                                | 72.0  | 55.6  | 4.7                                                             | 4.0   | 3.1   |
|                 |              |                      | Homodimer                                               | 65.0                                                | 53.1  | 42.4  | 2.3                                                             | 1.9   | 1.5   |
|                 |              |                      | Homotetramer                                            | 49.5                                                | 41.8  | 32.3  | 1.1                                                             | 0.9   | 0.7   |
| P0A7E9          | PyrH         | Cytoplasm            | Monomer                                                 | 118.7                                               | 100.3 | 77.4  | 10.4                                                            | 8.8   | 6.8   |
|                 |              |                      | Homoheptamer                                            | 58.8                                                | 48.0  | 38.4  | 1.8                                                             | 1.4   | 1.2   |
| P0A7F3          | PyrI         |                      | Monomer                                                 | 139.7                                               | 118.0 | 91.2  | 15.0                                                            | 12.7  | 9.8   |
|                 |              |                      | Heterododecamer (PyrB <sub>6</sub> -PyrI <sub>6</sub> ) | 44.9                                                | 38.0  | 29.3  | 0.8                                                             | 0.7   | 0.5   |
| P0AD83          | PyrL         |                      | Monomer                                                 | 224.7                                               | 189.8 | 146.6 | 39.4                                                            | 33.3  | 25.7  |
| P0AA53          | QmcA         | Cell inner membrane  | Monomer                                                 | 107.1                                               | 90.5  | 69.9  | 8.2                                                             | 7.0   | 5.4   |
|                 |              |                      | Complex with SecB                                       | 69.2                                                | 56.5  | 45.2  | 2.8                                                             | 2.3   | 1.8   |
|                 |              |                      | Complex with TF (Tig)                                   | 75.6                                                | 63.9  | 49.4  | 3.5                                                             | 3.0   | 2.3   |
| P28304          | QorA         |                      | Monomer                                                 | 105.4                                               | 89.0  | 68.8  | 7.9                                                             | 6.7   | 5.2   |
|                 |              |                      | Homodimer                                               | 80.3                                                | 65.6  | 52.4  | 4.1                                                             | 3.3   | 2.7   |
| P39315          | QorB         |                      | Monomer                                                 | 112.5                                               | 95.1  | 73.4  | 9.2                                                             | 7.8   | 6.0   |
| P52076          | QseB         | Cytoplasm            | Monomer                                                 | 121.1                                               | 102.3 | 79.0  | 10.9                                                            | 9.2   | 7.1   |
| P40719          | QseC         | Cell inner membrane  | Monomer                                                 | 91.6                                                | 77.4  | 59.8  | 5.7                                                             | 4.8   | 3.7   |
|                 |              |                      | Complex with SecB                                       | 65.3                                                | 53.3  | 42.6  | 2.4                                                             | 1.9   | 1.5   |
|                 |              |                      | Complex with TF (Tig)                                   | 70.4                                                | 59.5  | 45.9  | 2.9                                                             | 2.4   | 1.9   |
| P39376          | QseD         |                      | Monomer                                                 | 105.9                                               | 89.5  | 69.1  | 8.0                                                             | 6.8   | 5.2   |
| P0A7F9          | QueA         | Cytoplasm            | Monomer                                                 | 100.8                                               | 85.1  | 65.7  | 7.1                                                             | 6.0   | 4.7   |
| P77756          | QueC         |                      | Monomer                                                 | 119.5                                               | 101.0 | 78.0  | 10.6                                                            | 9.0   | 6.9   |
| P65870          | QueD         |                      | Monomer                                                 | 152.2                                               | 128.6 | 99.3  | 18.0                                                            | 15.2  | 11.8  |
| Q46920          | QueF         | Cytoplasm            | Monomer                                                 | 108.6                                               | 91.7  | 70.8  | 8.5                                                             | 7.2   | 5.6   |
|                 |              |                      | Homodimer                                               | 82.7                                                | 67.6  | 54.0  | 4.4                                                             | 3.6   | 2.9   |

| UniProtKB A. N. | Protein name | Subcellular location | Subunit               | $D_0 \left( \frac{\mu\text{m}^2}{\text{s}} \right)$ |       |       | $D_{\text{cyto}} \left( \frac{\mu\text{m}^2}{\text{s}} \right)$ |       |       |
|-----------------|--------------|----------------------|-----------------------|-----------------------------------------------------|-------|-------|-----------------------------------------------------------------|-------|-------|
|                 |              |                      |                       | 310 K                                               | 303 K | 293 K | 310 K                                                           | 303 K | 293 K |
| Q47274          | QuuD         |                      | Monomer               | 150.5                                               | 127.1 | 98.2  | 17.6                                                            | 14.9  | 11.5  |
| P76161          | QuuQ         |                      | Monomer               | 115.3                                               | 97.4  | 75.3  | 9.8                                                             | 8.3   | 6.4   |
| P15033          | RacC         |                      | Monomer               | 172.4                                               | 145.7 | 112.5 | 23.4                                                            | 19.7  | 15.2  |
| P76062          | RacR         |                      | Monomer               | 138.0                                               | 116.6 | 90.1  | 14.6                                                            | 12.3  | 9.5   |
| P24554          | RadA         |                      | Monomer               | 92.2                                                | 77.9  | 60.2  | 5.8                                                             | 4.9   | 3.8   |
| P0AD49          | RaiA         |                      | Monomer               | 156.7                                               | 132.4 | 102.2 | 19.2                                                            | 16.2  | 12.5  |
| P60240          | RapA         |                      | Monomer               | 67.4                                                | 57.0  | 44.0  | 2.6                                                             | 2.2   | 1.7   |
| P0AAZ4          | RarA         |                      | Monomer               | 92.1                                                | 77.8  | 60.1  | 5.7                                                             | 4.8   | 3.7   |
| P27844          | RarD         | Cell inner membrane  | Monomer               | 107.7                                               | 91.0  | 70.3  | 8.3                                                             | 7.1   | 5.4   |
|                 |              |                      | Complex with SecB     | 69.3                                                | 56.6  | 45.2  | 2.8                                                             | 2.3   | 1.8   |
|                 |              |                      | Complex with TF (Tig) | 75.8                                                | 64.0  | 49.5  | 3.5                                                             | 3.0   | 2.3   |
| P0AGL5          | RatA         |                      | Monomer               | 137.8                                               | 116.4 | 89.9  | 14.6                                                            | 12.3  | 9.5   |
| P52119          | RatB         |                      | Monomer               | 167.5                                               | 141.5 | 109.3 | 22.0                                                            | 18.6  | 14.4  |
| P31473          | RavA         | Cytoplasm            | Monomer               | 87.6                                                | 74.0  | 57.1  | 5.1                                                             | 4.3   | 3.3   |
| P0A7G2          | RbfA         | Cytoplasm            | Monomer               | 146.6                                               | 123.8 | 95.6  | 16.6                                                            | 14.0  | 10.9  |
| P0A8V0          | Rbn          |                      | Monomer               | 108.1                                               | 91.3  | 70.6  | 8.4                                                             | 7.1   | 5.5   |
|                 |              |                      | Homodimer             | 82.4                                                | 67.3  | 53.8  | 4.4                                                             | 3.6   | 2.8   |
| P04983          | RbsA         | Cell inner membrane  | Monomer               | 88.4                                                | 74.7  | 57.7  | 5.2                                                             | 4.4   | 3.4   |
|                 |              |                      | Complex with SecB     | 64.3                                                | 52.5  | 41.9  | 2.3                                                             | 1.9   | 1.5   |
|                 |              |                      | Complex with TF (Tig) | 69.1                                                | 58.4  | 45.1  | 2.8                                                             | 2.3   | 1.8   |
| P02925          | RbsB         | Periplasm            | Monomer               | 110.8                                               | 93.6  | 72.3  | 8.9                                                             | 7.5   | 5.8   |
|                 |              |                      | Complex with SecB     | 69.9                                                | 57.1  | 45.6  | 2.8                                                             | 2.3   | 1.9   |
|                 |              |                      | Complex with TF (Tig) | 76.7                                                | 64.8  | 50.0  | 3.6                                                             | 3.1   | 2.4   |
| P0AGI1          | RbsC         | Cell inner membrane  | Monomer               | 107.5                                               | 90.8  | 70.1  | 8.3                                                             | 7.0   | 5.4   |
|                 |              |                      | Complex with SecB     | 69.3                                                | 56.6  | 45.2  | 2.8                                                             | 2.3   | 1.8   |
|                 |              |                      | Complex with TF (Tig) | 75.7                                                | 64.0  | 49.4  | 3.5                                                             | 3.0   | 2.3   |
| P04982          | RbsD         | Cytoplasm            | Monomer               | 146.1                                               | 123.4 | 95.3  | 16.5                                                            | 13.9  | 10.8  |
|                 |              |                      | Homodecamer           | 59.2                                                | 48.4  | 38.6  | 1.8                                                             | 1.5   | 1.2   |
| P0A9J6          | RbsK         | Cytoplasm            | Monomer               | 109.0                                               | 92.1  | 71.1  | 8.6                                                             | 7.2   | 5.6   |
|                 |              |                      | Homodimer             | 83.0                                                | 67.8  | 54.2  | 4.4                                                             | 3.6   | 2.9   |
| P0ACQ0          | RbsR         |                      | Monomer               | 103.7                                               | 87.6  | 67.7  | 7.6                                                             | 6.5   | 5.0   |

| UniProtKB A. N. | Protein name | Subcellular location    | Subunit               | $D_0 \left( \frac{\mu\text{m}^2}{\text{s}} \right)$ |       |       | $D_{\text{cyto}} \left( \frac{\mu\text{m}^2}{\text{s}} \right)$ |       |       |
|-----------------|--------------|-------------------------|-----------------------|-----------------------------------------------------|-------|-------|-----------------------------------------------------------------|-------|-------|
|                 |              |                         |                       | 310 K                                               | 303 K | 293 K | 310 K                                                           | 303 K | 293 K |
| P76425          | RcnA         | Cell inner membrane     | Monomer               | 111.5                                               | 94.2  | 72.8  | 9.1                                                             | 7.7   | 5.9   |
|                 |              |                         | Complex with SecB     | 70.1                                                | 57.3  | 45.7  | 2.9                                                             | 2.3   | 1.9   |
|                 |              |                         | Complex with TF (Tig) | 76.9                                                | 64.9  | 50.2  | 3.6                                                             | 3.1   | 2.4   |
| P64534          | RcnB         | Periplasm               | Monomer               | 158.2                                               | 133.7 | 103.3 | 19.6                                                            | 16.5  | 12.8  |
|                 |              |                         | Complex with SecB     | 75.8                                                | 61.9  | 49.4  | 3.5                                                             | 2.9   | 2.3   |
|                 |              |                         | Complex with TF (Tig) | 85.1                                                | 71.9  | 55.5  | 4.7                                                             | 4.0   | 3.1   |
| P64530          | RcnR         | Cytoplasm               | Monomer               | 171.6                                               | 145.0 | 112.0 | 23.1                                                            | 19.5  | 15.1  |
| P69405          | RcsA         |                         | Monomer               | 123.4                                               | 104.2 | 80.5  | 11.4                                                            | 9.6   | 7.4   |
| P69407          | RcsB         |                         | Monomer               | 123.1                                               | 104.0 | 80.3  | 11.3                                                            | 9.6   | 7.4   |
|                 |              |                         | Homodimer             | 93.8                                                | 76.6  | 61.2  | 6.0                                                             | 4.9   | 3.9   |
| P14376          | RcsC         | Cell inner membrane     | Monomer               | 68.2                                                | 57.7  | 44.5  | 2.7                                                             | 2.3   | 1.7   |
|                 |              |                         | Complex with SecB     | 56.1                                                | 45.8  | 36.6  | 1.6                                                             | 1.3   | 1.0   |
|                 |              |                         | Complex with TF (Tig) | 59.0                                                | 49.8  | 38.5  | 1.8                                                             | 1.5   | 1.2   |
| P39838          | RcsD         | Cell inner membrane     | Monomer               | 69.9                                                | 59.0  | 45.6  | 2.8                                                             | 2.4   | 1.9   |
|                 |              |                         | Complex with SecB     | 56.9                                                | 46.5  | 37.1  | 1.6                                                             | 1.3   | 1.1   |
|                 |              |                         | Complex with TF (Tig) | 59.9                                                | 50.6  | 39.1  | 1.9                                                             | 1.6   | 1.2   |
| P69411          | RcsF         | Cell outer membrane     | Monomer               | 150.5                                               | 127.2 | 98.2  | 17.6                                                            | 14.9  | 11.5  |
|                 |              |                         | Complex with SecB     | 75.2                                                | 61.4  | 49.0  | 3.4                                                             | 2.8   | 2.2   |
|                 |              |                         | Complex with TF (Tig) | 84.2                                                | 71.1  | 54.9  | 4.6                                                             | 3.9   | 3.0   |
| P52061          | RdgB         |                         | Monomer               | 128.9                                               | 108.9 | 84.1  | 12.6                                                            | 10.6  | 8.2   |
|                 |              |                         | Homodimer             | 98.2                                                | 80.2  | 64.1  | 6.7                                                             | 5.5   | 4.4   |
| P36767          | RdgC         | Cytoplasm ><br>nucleoid | Monomer               | 106.8                                               | 90.2  | 69.7  | 8.2                                                             | 6.9   | 5.3   |
| P0C0K3          | RdoA         | Cytoplasm               | Monomer               | 102.1                                               | 86.3  | 66.6  | 7.4                                                             | 6.2   | 4.8   |
| P0A7G6          | RecA         | Cytoplasm               | Monomer               | 102.3                                               | 86.4  | 66.7  | 7.4                                                             | 6.2   | 4.8   |
| P08394          | RecB         |                         | Monomer               | 62.4                                                | 52.7  | 40.7  | 2.1                                                             | 1.8   | 1.4   |
| P07648          | RecC         |                         | Monomer               | 63.3                                                | 53.5  | 41.3  | 2.2                                                             | 1.8   | 1.4   |
| P04993          | RecD         |                         | Monomer               | 81.9                                                | 69.2  | 53.4  | 4.3                                                             | 3.6   | 2.8   |
| P15032          | RecE         |                         | Monomer               | 71.0                                                | 60.0  | 46.3  | 3.0                                                             | 2.5   | 1.9   |
|                 |              |                         | Homotetramer          | 41.2                                                | 33.7  | 26.9  | 0.6                                                             | 0.5   | 0.4   |
| P0A7H0          | RecF         | Cytoplasm               | Monomer               | 99.7                                                | 84.2  | 65.1  | 7.0                                                             | 5.9   | 4.5   |



| UniProtKB A. N. | Protein name | Subcellular location | Subunit                                                | $D_0 \left( \frac{\mu\text{m}^2}{\text{s}} \right)$ |       |       | $D_{\text{cyto}} \left( \frac{\mu\text{m}^2}{\text{s}} \right)$ |       |       |
|-----------------|--------------|----------------------|--------------------------------------------------------|-----------------------------------------------------|-------|-------|-----------------------------------------------------------------|-------|-------|
|                 |              |                      |                                                        | 310 K                                               | 303 K | 293 K | 310 K                                                           | 303 K | 293 K |
| P24230          | RecG         |                      | Monomer                                                | 77.7                                                | 65.7  | 50.7  | 3.8                                                             | 3.2   | 2.4   |
| P21893          | RecJ         |                      | Monomer                                                | 83.6                                                | 70.7  | 54.6  | 4.5                                                             | 3.8   | 3.0   |
| P05824          | RecN         |                      | Monomer                                                | 84.7                                                | 71.6  | 55.3  | 4.7                                                             | 3.9   | 3.0   |
| P0A7H3          | RecO         |                      | Monomer                                                | 116.2                                               | 98.2  | 75.8  | 10.0                                                            | 8.4   | 6.5   |
| P15043          | RecQ         |                      | Monomer                                                | 81.2                                                | 68.6  | 53.0  | 4.2                                                             | 3.5   | 2.7   |
| P0A7H6          | RecR         |                      | Monomer                                                | 126.7                                               | 107.1 | 82.7  | 12.1                                                            | 10.2  | 7.9   |
| P33228          | RecT         |                      | Monomer                                                | 112.6                                               | 95.1  | 73.5  | 9.3                                                             | 7.8   | 6.0   |
|                 |              |                      | Homotetramer                                           | 65.4                                                | 53.4  | 42.7  | 2.4                                                             | 1.9   | 1.5   |
| P33596          | RecX         | Cytoplasm            | Monomer                                                | 133.0                                               | 112.3 | 86.8  | 13.5                                                            | 11.4  | 8.8   |
| P0AG20          | RelA         |                      | Monomer                                                | 74.9                                                | 63.3  | 48.9  | 3.4                                                             | 2.9   | 2.2   |
| P0C079          | RelB         |                      | Monomer                                                | 179.2                                               | 151.4 | 117.0 | 25.3                                                            | 21.4  | 16.5  |
|                 |              |                      | Heterotetramer (RelE <sub>2</sub> –RelB <sub>2</sub> ) | 99.6                                                | 84.2  | 65.0  | 6.9                                                             | 5.9   | 4.5   |
| P0C077          | RelE         |                      | Monomer                                                | 164.9                                               | 139.3 | 107.6 | 21.3                                                            | 18.0  | 13.9  |
|                 |              |                      | Heterotetramer (RelE <sub>2</sub> –RelB <sub>2</sub> ) | 99.6                                                | 84.2  | 65.0  | 6.9                                                             | 5.9   | 4.5   |
| P07010          | Rem          |                      | Monomer                                                | 178.0                                               | 150.4 | 116.1 | 24.9                                                            | 21.1  | 16.3  |
| P75718          | RenD         |                      | Monomer                                                | 165.2                                               | 139.6 | 107.8 | 21.4                                                            | 18.1  | 14.0  |
| P09980          | Rep          |                      | Monomer                                                | 77.5                                                | 65.5  | 50.6  | 3.7                                                             | 3.1   | 2.4   |
| P27127          | RfaB         |                      | Monomer                                                | 99.4                                                | 84.0  | 64.9  | 6.9                                                             | 5.8   | 4.5   |
| P24173          | RfaC         |                      | Monomer                                                | 104.9                                               | 88.7  | 68.5  | 7.9                                                             | 6.6   | 5.1   |
| P37692          | RfaF         |                      | Monomer                                                | 101.1                                               | 85.5  | 66.0  | 7.2                                                             | 6.1   | 4.7   |
| P25740          | RfaG         |                      | Monomer                                                | 98.0                                                | 82.8  | 64.0  | 6.7                                                             | 5.6   | 4.4   |
| P0AFW0          | RfaH         |                      | Monomer                                                | 136.0                                               | 114.9 | 88.8  | 14.1                                                            | 12.0  | 9.2   |
| P27128          | RfaI         |                      | Monomer                                                | 100.8                                               | 85.1  | 65.8  | 7.1                                                             | 6.0   | 4.7   |
| P27129          | RfaJ         |                      | Monomer                                                | 101.1                                               | 85.5  | 66.0  | 7.2                                                             | 6.1   | 4.7   |
| P27243          | RfaL         | Cell inner membrane  | Monomer                                                | 94.1                                                | 79.5  | 61.4  | 6.1                                                             | 5.1   | 4.0   |
|                 |              |                      | Complex with SecB                                      | 66.0                                                | 53.9  | 43.1  | 2.4                                                             | 2.0   | 1.6   |
|                 |              |                      | Complex with TF (Tig)                                  | 71.4                                                | 60.3  | 46.6  | 3.0                                                             | 2.5   | 2.0   |
| P25741          | RfaP         |                      | Monomer                                                | 110.9                                               | 93.7  | 72.4  | 8.9                                                             | 7.6   | 5.8   |
| P25742          | RfaQ         |                      | Monomer                                                | 101.5                                               | 85.7  | 66.2  | 7.3                                                             | 6.1   | 4.7   |
| P27126          | RfaS         |                      | Monomer                                                | 103.6                                               | 87.5  | 67.6  | 7.6                                                             | 6.4   | 5.0   |
| P27240          | RfaY         |                      | Monomer                                                | 116.1                                               | 98.1  | 75.8  | 9.9                                                             | 8.4   | 6.5   |

| UniProtKB A. N. | Protein name | Subcellular location | Subunit               | $D_0 \left( \frac{\mu\text{m}^2}{\text{s}} \right)$ |       |       | $D_{\text{cyto}} \left( \frac{\mu\text{m}^2}{\text{s}} \right)$ |       |       |
|-----------------|--------------|----------------------|-----------------------|-----------------------------------------------------|-------|-------|-----------------------------------------------------------------|-------|-------|
|                 |              |                      |                       | 310 K                                               | 303 K | 293 K | 310 K                                                           | 303 K | 293 K |
| P27241          | RfaZ         |                      | Monomer               | 108.1                                               | 91.4  | 70.6  | 8.4                                                             | 7.1   | 5.5   |
| P37759          | RfbB         |                      | Monomer               | 99.6                                                | 84.2  | 65.0  | 6.9                                                             | 5.9   | 4.5   |
|                 |              |                      | Homodimer             | 75.9                                                | 62.0  | 49.6  | 3.5                                                             | 2.9   | 2.3   |
| P37745          | RfbC         |                      | Monomer               | 128.3                                               | 108.4 | 83.7  | 12.4                                                            | 10.5  | 8.1   |
|                 |              |                      | Homodimer             | 97.8                                                | 79.9  | 63.8  | 6.6                                                             | 5.4   | 4.3   |
| P37760          | RfbD         |                      | Monomer               | 108.4                                               | 91.6  | 70.8  | 8.5                                                             | 7.2   | 5.5   |
|                 |              |                      | Homodimer             | 82.6                                                | 67.5  | 53.9  | 4.4                                                             | 3.6   | 2.9   |
| P37746          | RfbX         | Cell inner membrane  | Monomer               | 95.4                                                | 80.6  | 62.2  | 6.3                                                             | 5.3   | 4.1   |
|                 |              |                      | Complex with SecB     | 66.3                                                | 54.2  | 43.3  | 2.5                                                             | 2.0   | 1.6   |
|                 |              |                      | Complex with TF (Tig) | 71.8                                                | 60.7  | 46.9  | 3.1                                                             | 2.6   | 2.0   |
| P37748          | Rfc          | Cell inner membrane  | Monomer               | 95.9                                                | 81.0  | 62.6  | 6.3                                                             | 5.4   | 4.1   |
|                 |              |                      | Complex with SecB     | 66.5                                                | 54.3  | 43.4  | 2.5                                                             | 2.0   | 1.6   |
|                 |              |                      | Complex with TF (Tig) | 72.0                                                | 60.8  | 47.0  | 3.1                                                             | 2.6   | 2.0   |
| P27833          | RffA         |                      | Monomer               | 98.4                                                | 83.1  | 64.2  | 6.7                                                             | 5.7   | 4.4   |
| P27832          | RffC         |                      | Monomer               | 122.0                                               | 103.0 | 79.6  | 11.1                                                            | 9.4   | 7.2   |
| P27830          | RffG         |                      | Monomer               | 100.4                                               | 84.8  | 65.5  | 7.1                                                             | 6.0   | 4.6   |
|                 |              |                      | Homodimer             | 76.5                                                | 62.5  | 49.9  | 3.6                                                             | 2.9   | 2.4   |
| P32170          | RhaA         | Cytoplasm            | Monomer               | 93.9                                                | 79.3  | 61.3  | 6.0                                                             | 5.1   | 3.9   |
|                 |              |                      | Homotetramer          | 54.5                                                | 44.5  | 35.6  | 1.4                                                             | 1.2   | 0.9   |
| P32171          | RhaB         |                      | Monomer               | 89.0                                                | 75.2  | 58.1  | 5.3                                                             | 4.5   | 3.4   |
| P32169          | RhaD         | Cytoplasm            | Monomer               | 111.9                                               | 94.6  | 73.0  | 9.1                                                             | 7.7   | 6.0   |
|                 |              |                      | Homotetramer          | 65.0                                                | 53.1  | 42.4  | 2.3                                                             | 1.9   | 1.5   |
| P32156          | RhaM         | Cytoplasm            | Monomer               | 159.2                                               | 134.5 | 103.9 | 19.8                                                            | 16.7  | 12.9  |
|                 |              |                      | Homodimer             | 121.4                                               | 99.1  | 79.2  | 11.0                                                            | 9.0   | 7.2   |
| P09378          | RhaR         | Cytoplasm            | Monomer               | 108.9                                               | 92.0  | 71.0  | 8.6                                                             | 7.2   | 5.6   |
| P09377          | RhaS         | Cytoplasm            | Monomer               | 108.9                                               | 92.0  | 71.1  | 8.6                                                             | 7.2   | 5.6   |
| P27125          | RhaT         | Cell inner membrane  | Monomer               | 103.0                                               | 87.0  | 67.2  | 7.5                                                             | 6.3   | 4.9   |
|                 |              |                      | Complex with SecB     | 68.3                                                | 55.8  | 44.5  | 2.7                                                             | 2.2   | 1.7   |
|                 |              |                      | Complex with TF (Tig) | 74.4                                                | 62.8  | 48.5  | 3.3                                                             | 2.8   | 2.2   |
| POA8J8          | RhlB         |                      | Monomer               | 94.0                                                | 79.4  | 61.3  | 6.0                                                             | 5.1   | 3.9   |
| P25888          | RhlE         |                      | Monomer               | 91.8                                                | 77.6  | 59.9  | 5.7                                                             | 4.8   | 3.7   |

| UniProtKB A. N. | Protein name | Subcellular location | Subunit               | $D_0 \left( \frac{\mu\text{m}^2}{\text{s}} \right)$ |       |       | $D_{\text{cyto}} \left( \frac{\mu\text{m}^2}{\text{s}} \right)$ |       |       |
|-----------------|--------------|----------------------|-----------------------|-----------------------------------------------------|-------|-------|-----------------------------------------------------------------|-------|-------|
|                 |              |                      |                       | 310 K                                               | 303 K | 293 K | 310 K                                                           | 303 K | 293 K |
| P76469          | RhmA         |                      | Monomer               | 113.8                                               | 96.1  | 74.2  | 9.5                                                             | 8.0   | 6.2   |
|                 |              |                      | Homohexamer           | 56.4                                                | 46.0  | 36.8  | 1.6                                                             | 1.3   | 1.0   |
| P77215          | RhmD         |                      | Monomer               | 96.3                                                | 81.4  | 62.9  | 6.4                                                             | 5.4   | 4.2   |
|                 |              |                      | Homooctamer           | 42.6                                                | 34.8  | 27.8  | 0.7                                                             | 0.6   | 0.4   |
| P77732          | RhmR         |                      | Monomer               | 113.8                                               | 96.1  | 74.3  | 9.5                                                             | 8.0   | 6.2   |
| P76470          | RhmT         | Cell inner membrane  | Monomer               | 94.6                                                | 79.9  | 61.7  | 6.1                                                             | 5.2   | 4.0   |
|                 |              |                      | Complex with SecB     | 66.1                                                | 54.0  | 43.2  | 2.4                                                             | 2.0   | 1.6   |
|                 |              |                      | Complex with TF (Tig) | 71.5                                                | 60.4  | 46.7  | 3.0                                                             | 2.6   | 2.0   |
| P0AG30          | Rho          |                      | Monomer               | 94.0                                                | 79.5  | 61.4  | 6.0                                                             | 5.1   | 3.9   |
|                 |              |                      | Homohexamer           | 46.6                                                | 38.1  | 30.4  | 0.9                                                             | 0.7   | 0.6   |
| P0ADF3          | RhoL         |                      | Monomer               | 253.4                                               | 214.1 | 165.4 | 49.5                                                            | 41.8  | 32.3  |
| P16916          | RhsA         |                      | Monomer               | 58.7                                                | 49.6  | 38.3  | 1.8                                                             | 1.5   | 1.2   |
| P16917          | RhsB         |                      | Monomer               | 58.3                                                | 49.2  | 38.0  | 1.7                                                             | 1.5   | 1.1   |
| P16918          | RhsC         |                      | Monomer               | 58.5                                                | 49.4  | 38.2  | 1.7                                                             | 1.5   | 1.1   |
| P16919          | RhsD         |                      | Monomer               | 58.2                                                | 49.2  | 38.0  | 1.7                                                             | 1.5   | 1.1   |
| P24211          | RhsE         |                      | Monomer               | 77.4                                                | 65.4  | 50.5  | 3.7                                                             | 3.1   | 2.4   |
| P0AA67          | RhtA         | Cell inner membrane  | Monomer               | 110.5                                               | 93.3  | 72.1  | 8.9                                                             | 7.5   | 5.8   |
|                 |              |                      | Complex with SecB     | 69.9                                                | 57.1  | 45.6  | 2.8                                                             | 2.3   | 1.9   |
|                 |              |                      | Complex with TF (Tig) | 76.6                                                | 64.7  | 50.0  | 3.6                                                             | 3.1   | 2.4   |
| P0AG34          | RhtB         | Cell membrane        | Monomer               | 125.7                                               | 106.2 | 82.0  | 11.9                                                            | 10.0  | 7.8   |
|                 |              |                      | Complex with SecB     | 72.4                                                | 59.2  | 47.3  | 3.1                                                             | 2.6   | 2.0   |
|                 |              |                      | Complex with TF (Tig) | 80.2                                                | 67.7  | 52.3  | 4.1                                                             | 3.4   | 2.7   |
| P0AG38          | RhtC         | Cell inner membrane  | Monomer               | 125.6                                               | 106.1 | 82.0  | 11.9                                                            | 10.0  | 7.7   |
|                 |              |                      | Complex with SecB     | 72.4                                                | 59.2  | 47.3  | 3.1                                                             | 2.5   | 2.0   |
|                 |              |                      | Complex with TF (Tig) | 80.2                                                | 67.7  | 52.3  | 4.1                                                             | 3.4   | 2.6   |
| P0A7I7          | RibA         |                      | Monomer               | 127.0                                               | 107.3 | 82.9  | 12.2                                                            | 10.3  | 7.9   |
|                 |              |                      | Homodimer             | 96.8                                                | 79.1  | 63.2  | 6.5                                                             | 5.3   | 4.2   |
| P0A7J0          | RibB         | Cell membrane        | Monomer               | 123.7                                               | 104.5 | 80.7  | 11.5                                                            | 9.7   | 7.5   |
|                 |              |                      | Complex with SecB     | 72.1                                                | 58.9  | 47.1  | 3.1                                                             | 2.5   | 2.0   |
|                 |              |                      | Complex with TF (Tig) | 79.8                                                | 67.4  | 52.1  | 4.0                                                             | 3.4   | 2.6   |
| P25539          | RibD         |                      | Monomer               | 99.9                                                | 84.4  | 65.2  | 7.0                                                             | 5.9   | 4.6   |

| UniProtKB A. N. | Protein name | Subcellular location | Subunit      | $D_0 \left( \frac{\mu\text{m}^2}{\text{s}} \right)$ |       |       | $D_{\text{cyto}} \left( \frac{\mu\text{m}^2}{\text{s}} \right)$ |       |       |
|-----------------|--------------|----------------------|--------------|-----------------------------------------------------|-------|-------|-----------------------------------------------------------------|-------|-------|
|                 |              |                      |              | 310 K                                               | 303 K | 293 K | 310 K                                                           | 303 K | 293 K |
|                 |              |                      | Homodimer    | 76.1                                                | 62.2  | 49.7  | 3.6                                                             | 2.9   | 2.3   |
| P0AFU8          | RibE         |                      | Monomer      | 123.5                                               | 104.4 | 80.6  | 11.4                                                            | 9.7   | 7.5   |
| P0AG40          | RibF         |                      | Monomer      | 105.9                                               | 89.5  | 69.1  | 8.0                                                             | 6.8   | 5.2   |
| P61714          | RibH         |                      | Monomer      | 142.9                                               | 120.8 | 93.3  | 15.8                                                            | 13.3  | 10.3  |
| P41409          | RihA         |                      | Monomer      | 107.0                                               | 90.4  | 69.8  | 8.2                                                             | 6.9   | 5.4   |
| P33022          | RihB         |                      | Monomer      | 107.1                                               | 90.5  | 69.9  | 8.2                                                             | 7.0   | 5.4   |
|                 |              |                      | Homotetramer | 62.2                                                | 50.8  | 40.6  | 2.1                                                             | 1.7   | 1.4   |
| P22564          | RihC         |                      | Monomer      | 108.6                                               | 91.8  | 70.9  | 8.5                                                             | 7.2   | 5.6   |
| P0A944          | RimI         | Cytoplasm            | Monomer      | 141.4                                               | 119.5 | 92.3  | 15.4                                                            | 13.0  | 10.0  |
| P0A948          | RimJ         | Cytoplasm            | Monomer      | 125.1                                               | 105.7 | 81.7  | 11.8                                                            | 9.9   | 7.7   |
| P0C0U4          | RimK         |                      | Monomer      | 108.8                                               | 91.9  | 71.0  | 8.5                                                             | 7.2   | 5.6   |
| P13857          | RimL         | Cytoplasm            | Monomer      | 129.8                                               | 109.6 | 84.7  | 12.8                                                            | 10.8  | 8.3   |
| P0A7X6          | RimM         | Cytoplasm            | Monomer      | 129.9                                               | 109.8 | 84.8  | 12.8                                                            | 10.8  | 8.3   |
| P45748          | RimN         | Cytoplasm            | Monomer      | 129.5                                               | 109.4 | 84.5  | 12.7                                                            | 10.7  | 8.3   |
| P0AEI4          | RimO         | Cytoplasm            | Monomer      | 92.1                                                | 77.8  | 60.1  | 5.7                                                             | 4.9   | 3.7   |
| P0A8A8          | RimP         | Cytoplasm            | Monomer      | 141.3                                               | 119.3 | 92.2  | 15.4                                                            | 13.0  | 10.0  |
| P36999          | RlmA         |                      | Monomer      | 111.5                                               | 94.2  | 72.8  | 9.1                                                             | 7.7   | 5.9   |
|                 |              |                      | Homodimer    | 85.0                                                | 69.4  | 55.5  | 4.7                                                             | 3.8   | 3.1   |
| P63177          | RlmB         | Cytoplasm            | Monomer      | 117.6                                               | 99.4  | 76.8  | 10.2                                                            | 8.6   | 6.7   |
|                 |              |                      | Homodimer    | 89.7                                                | 73.2  | 58.5  | 5.4                                                             | 4.4   | 3.5   |
| P0C0R7          | RlmE         | Cytoplasm            | Monomer      | 123.8                                               | 104.6 | 80.8  | 11.5                                                            | 9.7   | 7.5   |
| P75782          | RlmF         | Cytoplasm            | Monomer      | 106.5                                               | 90.0  | 69.5  | 8.1                                                             | 6.9   | 5.3   |
| P42596          | RlmG         | Cytoplasm            | Monomer      | 98.0                                                | 82.8  | 63.9  | 6.7                                                             | 5.6   | 4.4   |
| P0A8I8          | RlmH         | Cytoplasm            | Monomer      | 139.0                                               | 117.5 | 90.7  | 14.8                                                            | 12.5  | 9.7   |
|                 |              |                      | Homodimer    | 106.0                                               | 86.6  | 69.1  | 8.0                                                             | 6.6   | 5.2   |
| P75876          | RlmI         | Cytoplasm            | Monomer      | 96.2                                                | 81.3  | 62.8  | 6.4                                                             | 5.4   | 4.2   |
|                 |              |                      | Homodimer    | 73.3                                                | 59.9  | 47.8  | 3.2                                                             | 2.6   | 2.1   |
| P75864          | RlmL         | Cytoplasm            | Monomer      | 76.8                                                | 64.9  | 50.1  | 3.6                                                             | 3.1   | 2.4   |
|                 |              |                      | Homodimer    | 58.5                                                | 47.8  | 38.2  | 1.7                                                             | 1.4   | 1.1   |
| P0ADR6          | RlmM         | Cytoplasm            | Monomer      | 98.4                                                | 83.1  | 64.2  | 6.7                                                             | 5.7   | 4.4   |
| P36979          | RlmN         | Cytoplasm            | Monomer      | 97.3                                                | 82.2  | 63.5  | 6.6                                                             | 5.5   | 4.3   |

| UniProtKB A. N. | Protein name | Subcellular location           | Subunit               | $D_0 \left( \frac{\mu\text{m}^2}{\text{s}} \right)$ |       |       | $D_{\text{cyto}} \left( \frac{\mu\text{m}^2}{\text{s}} \right)$ |       |       |
|-----------------|--------------|--------------------------------|-----------------------|-----------------------------------------------------|-------|-------|-----------------------------------------------------------------|-------|-------|
|                 |              |                                |                       | 310 K                                               | 303 K | 293 K | 310 K                                                           | 303 K | 293 K |
| P10100          | RlpA         | Cell membrane                  | Monomer               | 102.7                                               | 86.8  | 67.0  | 7.5                                                             | 6.3   | 4.9   |
|                 |              |                                | Complex with SecB     | 68.2                                                | 55.7  | 44.5  | 2.7                                                             | 2.2   | 1.7   |
|                 |              |                                | Complex with TF (Tig) | 74.3                                                | 62.8  | 48.5  | 3.3                                                             | 2.8   | 2.2   |
| P0AA37          | RluA         |                                | Monomer               | 120.7                                               | 102.0 | 78.8  | 10.9                                                            | 9.2   | 7.1   |
| P37765          | RluB         |                                | Monomer               | 108.4                                               | 91.6  | 70.7  | 8.5                                                             | 7.2   | 5.5   |
| P0AA39          | RluC         |                                | Monomer               | 104.4                                               | 88.2  | 68.1  | 7.8                                                             | 6.6   | 5.1   |
| P33643          | RluD         |                                | Monomer               | 103.2                                               | 87.2  | 67.3  | 7.5                                                             | 6.4   | 4.9   |
| P75966          | RluE         |                                | Monomer               | 120.7                                               | 102.0 | 78.8  | 10.8                                                            | 9.2   | 7.1   |
| P32684          | RluF         |                                | Monomer               | 108.7                                               | 91.8  | 70.9  | 8.5                                                             | 7.2   | 5.6   |
| P0AFW2          | Rmf          |                                | Monomer               | 204.2                                               | 172.5 | 133.2 | 32.8                                                            | 27.7  | 21.4  |
| P37744          | RmlA1        |                                | Monomer               | 108.4                                               | 91.6  | 70.8  | 8.5                                                             | 7.2   | 5.5   |
|                 |              |                                | Homotetramer          | 63.0                                                | 51.4  | 41.1  | 2.1                                                             | 1.8   | 1.4   |
| P61887          | RmlA2        |                                | Monomer               | 108.4                                               | 91.6  | 70.7  | 8.5                                                             | 7.2   | 5.5   |
|                 |              |                                | Homotetramer          | 62.9                                                | 51.4  | 41.1  | 2.1                                                             | 1.7   | 1.4   |
| P0AG71          | RmuC         |                                | Monomer               | 88.6                                                | 74.8  | 57.8  | 5.2                                                             | 4.4   | 3.4   |
| P21338          | Rna          | Periplasm                      |                       |                                                     |       |       |                                                                 |       |       |
|                 |              | Cytoplasm                      | Monomer               | 112.7                                               | 95.2  | 73.6  | 9.3                                                             | 7.8   | 6.1   |
| P30850          | Rnb          | Cytoplasm                      | Monomer               | 79.4                                                | 67.0  | 51.8  | 4.0                                                             | 3.3   | 2.6   |
| P0A7Y0          | Rnc          | Cytoplasm                      | Monomer               | 119.4                                               | 100.9 | 77.9  | 10.6                                                            | 8.9   | 6.9   |
| P09155          | Rnd          | Cytoplasm                      | Monomer               | 97.6                                                | 82.5  | 63.7  | 6.6                                                             | 5.6   | 4.3   |
| P21513          | Rne          | Cytoplasm                      | Monomer               | 65.5                                                | 55.4  | 42.8  | 2.4                                                             | 2.0   | 1.6   |
| P0A766          | RnfA         | Cell inner membrane            | Monomer               | 129.2                                               | 109.2 | 84.3  | 12.6                                                            | 10.7  | 8.2   |
|                 |              |                                | Complex with SecB     | 72.9                                                | 59.6  | 47.6  | 3.2                                                             | 2.6   | 2.1   |
|                 |              |                                | Complex with TF (Tig) | 80.9                                                | 68.3  | 52.8  | 4.2                                                             | 3.5   | 2.7   |
| P77223          | RnfB         | Cytoplasm. Cell inner membrane | Monomer               | 130.1                                               | 109.9 | 84.9  | 12.8                                                            | 10.8  | 8.4   |
| P77611          | RnfC         | Cell inner membrane            | Monomer               | 76.3                                                | 64.4  | 49.8  | 3.6                                                             | 3.0   | 2.3   |
|                 |              |                                | Complex with SecB     | 59.8                                                | 48.8  | 39.0  | 1.9                                                             | 1.5   | 1.2   |
|                 |              |                                | Complex with TF (Tig) | 63.4                                                | 53.6  | 41.4  | 2.2                                                             | 1.8   | 1.4   |
| P76182          | RnfD         | Cell inner membrane            | Monomer               | 102.1                                               | 86.2  | 66.6  | 7.4                                                             | 6.2   | 4.8   |
|                 |              |                                | Complex with SecB     | 68.1                                                | 55.6  | 44.4  | 2.6                                                             | 2.2   | 1.7   |

| UniProtKB A. N. | Protein name | Subcellular location     | Subunit               | $D_0 \left( \frac{\mu\text{m}^2}{\text{s}} \right)$ |       |       | $D_{\text{cyto}} \left( \frac{\mu\text{m}^2}{\text{s}} \right)$ |       |       |
|-----------------|--------------|--------------------------|-----------------------|-----------------------------------------------------|-------|-------|-----------------------------------------------------------------|-------|-------|
|                 |              |                          |                       | 310 K                                               | 303 K | 293 K | 310 K                                                           | 303 K | 293 K |
|                 |              |                          | Complex with TF (Tig) | 74.1                                                | 62.6  | 48.4  | 3.3                                                             | 2.8   | 2.2   |
|                 |              |                          | Monomer               | 121.5                                               | 102.6 | 79.3  | 11.0                                                            | 9.3   | 7.2   |
| P77179          | RnfE         | Cell inner membrane      | Complex with SecB     | 71.8                                                | 58.7  | 46.9  | 3.1                                                             | 2.5   | 2.0   |
|                 |              |                          | Complex with TF (Tig) | 79.3                                                | 67.0  | 51.7  | 3.9                                                             | 3.3   | 2.6   |
|                 |              |                          | Monomer               | 126.8                                               | 107.2 | 82.8  | 12.1                                                            | 10.2  | 7.9   |
| P77285          | RnfG         | Cell inner membrane      | Complex with SecB     | 72.6                                                | 59.3  | 47.4  | 3.1                                                             | 2.6   | 2.0   |
|                 |              |                          | Complex with TF (Tig) | 80.4                                                | 67.9  | 52.5  | 4.1                                                             | 3.5   | 2.7   |
| P0A9J0          | Rng          | Cytoplasm > cytoskeleton | Monomer               | 88.2                                                | 74.5  | 57.6  | 5.2                                                             | 4.4   | 3.4   |
| P0A7Y4          | RnhA         | Cytoplasm                | Monomer               | 138.2                                               | 116.8 | 90.2  | 14.7                                                            | 12.4  | 9.6   |
| P10442          | RnhB         | Cytoplasm                | Monomer               | 127.7                                               | 107.9 | 83.4  | 12.3                                                            | 10.4  | 8.0   |
| P0AFW4          | Rnk          |                          | Monomer               | 147.4                                               | 124.6 | 96.2  | 16.8                                                            | 14.2  | 11.0  |
| P0A7Y8          | RnpA         |                          | Monomer               | 152.1                                               | 128.5 | 99.3  | 18.0                                                            | 15.2  | 11.7  |
| P21499          | Rnr          | Cytoplasm                | Monomer               | 72.2                                                | 61.0  | 47.1  | 3.1                                                             | 2.6   | 2.0   |
|                 |              |                          | Monomer               | 123.4                                               | 104.2 | 80.5  | 11.4                                                            | 9.6   | 7.4   |
| P30014          | Rnt          |                          | Homodimer             | 94.0                                                | 76.8  | 61.4  | 6.0                                                             | 4.9   | 3.9   |
| P0ACI0          | Rob          |                          | Monomer               | 107.9                                               | 91.1  | 70.4  | 8.4                                                             | 7.1   | 5.5   |
|                 |              |                          | Monomer               | 104.2                                               | 88.0  | 68.0  | 7.7                                                             | 6.5   | 5.0   |
| P27434          | RodZ         | Cell inner membrane      | Complex with SecB     | 68.6                                                | 56.0  | 44.7  | 2.7                                                             | 2.2   | 1.8   |
|                 |              |                          | Complex with TF (Tig) | 74.8                                                | 63.2  | 48.8  | 3.4                                                             | 2.9   | 2.2   |
| P0AFW8          | Rof          |                          | Monomer               | 176.2                                               | 148.8 | 115.0 | 24.4                                                            | 20.6  | 15.9  |
| P0AG07          | Rpe          |                          | Monomer               | 121.3                                               | 102.5 | 79.2  | 11.0                                                            | 9.3   | 7.2   |
|                 |              |                          | Monomer               | 121.6                                               | 102.7 | 79.3  | 11.0                                                            | 9.3   | 7.2   |
| P0CG19          | Rph          |                          | Homodimer             | 92.6                                                | 75.7  | 60.5  | 5.8                                                             | 4.8   | 3.8   |
|                 |              |                          | Monomer               | 124.8                                               | 105.4 | 81.4  | 11.7                                                            | 9.9   | 7.6   |
| P0A7Z0          | RpiA         |                          | Homodimer             | 95.1                                                | 77.7  | 62.0  | 6.2                                                             | 5.1   | 4.1   |
|                 |              |                          | Monomer               | 143.2                                               | 121.0 | 93.5  | 15.8                                                            | 13.4  | 10.3  |
| P37351          | RpiB         |                          | Homodimer             | 109.2                                               | 89.2  | 71.2  | 8.6                                                             | 7.0   | 5.6   |
| P0ACS7          | RpiR         |                          | Monomer               | 108.9                                               | 92.0  | 71.0  | 8.6                                                             | 7.2   | 5.6   |
| P0A7L0          | RplA         |                          | Monomer               | 121.0                                               | 102.2 | 78.9  | 10.9                                                            | 9.2   | 7.1   |
| P60422          | RplB         |                          | Monomer               | 112.4                                               | 94.9  | 73.3  | 9.2                                                             | 7.8   | 6.0   |

| UniProtKB A. N. | Protein name | Subcellular location | Subunit | $D_0 \left( \frac{\mu\text{m}^2}{\text{s}} \right)$ |       |       | $D_{\text{cyto}} \left( \frac{\mu\text{m}^2}{\text{s}} \right)$ |       |       |
|-----------------|--------------|----------------------|---------|-----------------------------------------------------|-------|-------|-----------------------------------------------------------------|-------|-------|
|                 |              |                      |         | 310 K                                               | 303 K | 293 K | 310 K                                                           | 303 K | 293 K |
| P60438          | RplC         |                      | Monomer | 126.1                                               | 106.5 | 82.3  | 12.0                                                            | 10.1  | 7.8   |
| P60723          | RplD         |                      | Monomer | 126.5                                               | 106.8 | 82.5  | 12.0                                                            | 10.2  | 7.9   |
| P62399          | RplE         |                      | Monomer | 130.7                                               | 110.4 | 85.3  | 13.0                                                            | 10.9  | 8.5   |
| P0AG55          | RplF         |                      | Monomer | 134.4                                               | 113.5 | 87.7  | 13.8                                                            | 11.6  | 9.0   |
| P0A7R1          | RplI         |                      | Monomer | 144.3                                               | 121.9 | 94.2  | 16.1                                                            | 13.6  | 10.5  |
| P0A7J3          | RplJ         |                      | Monomer | 137.9                                               | 116.5 | 90.0  | 14.6                                                            | 12.3  | 9.5   |
| P0A7J7          | RplK         |                      | Monomer | 147.6                                               | 124.7 | 96.3  | 16.9                                                            | 14.3  | 11.0  |
| P0A7K2          | RplL         |                      | Monomer | 159.1                                               | 134.4 | 103.8 | 19.8                                                            | 16.7  | 12.9  |
| P0AA10          | RplM         |                      | Monomer | 143.4                                               | 121.2 | 93.6  | 15.9                                                            | 13.4  | 10.4  |
| P0ADY3          | RplN         |                      | Monomer | 153.2                                               | 129.4 | 100.0 | 18.3                                                            | 15.4  | 11.9  |
| P02413          | RplO         |                      | Monomer | 147.2                                               | 124.4 | 96.1  | 16.8                                                            | 14.2  | 11.0  |
| P0ADY7          | RplP         |                      | Monomer | 146.1                                               | 123.4 | 95.3  | 16.5                                                            | 13.9  | 10.8  |
| P0AG44          | RplQ         |                      | Monomer | 149.7                                               | 126.5 | 97.7  | 17.4                                                            | 14.7  | 11.3  |
| P0C018          | RplR         |                      | Monomer | 156.7                                               | 132.4 | 102.3 | 19.2                                                            | 16.2  | 12.5  |
| P0A7K6          | RplS         |                      | Monomer | 155.0                                               | 131.0 | 101.2 | 18.7                                                            | 15.8  | 12.2  |
| P0A7L3          | RplT         |                      | Monomer | 153.4                                               | 129.6 | 100.1 | 18.3                                                            | 15.5  | 12.0  |
| P0AG48          | RplU         |                      | Monomer | 163.0                                               | 137.7 | 106.3 | 20.8                                                            | 17.6  | 13.6  |
| P61175          | RplV         |                      | Monomer | 159.4                                               | 134.7 | 104.0 | 19.9                                                            | 16.8  | 13.0  |
| P0ADZ0          | RplW         |                      | Monomer | 165.0                                               | 139.4 | 107.7 | 21.3                                                            | 18.0  | 13.9  |
| P60624          | RplX         |                      | Monomer | 164.4                                               | 138.9 | 107.3 | 21.2                                                            | 17.9  | 13.8  |
| P68919          | RplY         |                      | Monomer | 168.0                                               | 142.0 | 109.7 | 22.2                                                            | 18.7  | 14.5  |
| P0A7L8          | RpmA         |                      | Monomer | 178.8                                               | 151.1 | 116.7 | 25.2                                                            | 21.3  | 16.4  |
| P0A7M2          | RpmB         |                      | Monomer | 179.7                                               | 151.9 | 117.3 | 25.4                                                            | 21.5  | 16.6  |
| P0A7M6          | RpmC         |                      | Monomer | 195.5                                               | 165.1 | 127.5 | 30.1                                                            | 25.4  | 19.6  |
| P0AG51          | RpmD         |                      | Monomer | 203.7                                               | 172.1 | 133.0 | 32.6                                                            | 27.6  | 21.3  |
| P0A7M9          | RpmE         |                      | Monomer | 189.5                                               | 160.1 | 123.7 | 28.3                                                            | 23.9  | 18.4  |
| P0A7N1          | RpmE2        |                      | Monomer | 173.1                                               | 146.2 | 112.9 | 23.5                                                            | 19.9  | 15.4  |
| P0A7N4          | RpmF         |                      | Monomer | 204.9                                               | 173.1 | 133.7 | 33.0                                                            | 27.9  | 21.5  |
| P0A7N9          | RpmG         |                      | Monomer | 205.9                                               | 173.9 | 134.3 | 33.3                                                            | 28.1  | 21.7  |
| P0A7P5          | RpmH         |                      | Monomer | 220.0                                               | 185.8 | 143.5 | 37.9                                                            | 32.0  | 24.7  |
| P0A7Q1          | RpmI         |                      | Monomer | 195.3                                               | 165.0 | 127.4 | 30.0                                                            | 25.4  | 19.6  |

| UniProtKB A. N. | Protein name | Subcellular location | Subunit   | $D_0 \left( \frac{\mu\text{m}^2}{\text{s}} \right)$ |       |       | $D_{\text{cyto}} \left( \frac{\mu\text{m}^2}{\text{s}} \right)$ |       |       |
|-----------------|--------------|----------------------|-----------|-----------------------------------------------------|-------|-------|-----------------------------------------------------------------|-------|-------|
|                 |              |                      |           | 310 K                                               | 303 K | 293 K | 310 K                                                           | 303 K | 293 K |
| P0A7Q6          | RpmJ         |                      | Monomer   | 238.8                                               | 201.7 | 155.8 | 44.3                                                            | 37.4  | 28.9  |
| Q2EEQ2          | RpmJ2        |                      | Monomer   | 218.6                                               | 184.7 | 142.6 | 37.4                                                            | 31.6  | 24.4  |
| P0A7Z4          | RpoA         |                      | Monomer   | 103.8                                               | 87.7  | 67.8  | 7.7                                                             | 6.5   | 5.0   |
|                 |              |                      | Homodimer | 79.1                                                | 64.6  | 51.6  | 3.9                                                             | 3.2   | 2.6   |
| P0A8V2          | RpoB         |                      | Monomer   | 59.6                                                | 50.3  | 38.9  | 1.8                                                             | 1.6   | 1.2   |
| P0A8T7          | RpoC         |                      | Monomer   | 58.9                                                | 49.8  | 38.4  | 1.8                                                             | 1.5   | 1.2   |
| P00579          | RpoD         |                      | Monomer   | 80.3                                                | 67.9  | 52.4  | 4.1                                                             | 3.4   | 2.7   |
| P0AGB6          | RpoE         |                      | Monomer   | 127.3                                               | 107.6 | 83.1  | 12.2                                                            | 10.3  | 8.0   |
| P0AGB3          | RpoH         |                      | Monomer   | 108.7                                               | 91.9  | 70.9  | 8.5                                                             | 7.2   | 5.6   |
| P24255          | RpoN         |                      | Monomer   | 89.1                                                | 75.3  | 58.1  | 5.3                                                             | 4.5   | 3.5   |
| P13445          | RpoS         |                      | Monomer   | 102.3                                               | 86.4  | 66.7  | 7.4                                                             | 6.2   | 4.8   |
| P0A800          | RpoZ         |                      | Monomer   | 170.9                                               | 144.4 | 111.5 | 22.9                                                            | 19.4  | 15.0  |
| P0A776          | RppH         |                      | Monomer   | 129.5                                               | 109.4 | 84.5  | 12.7                                                            | 10.7  | 8.3   |
| P0AG67          | RpsA         |                      | Monomer   | 84.8                                                | 71.7  | 55.4  | 4.7                                                             | 4.0   | 3.1   |
| P0A7V0          | RpsB         |                      | Monomer   | 117.3                                               | 99.1  | 76.6  | 10.2                                                            | 8.6   | 6.6   |
| P0A7V3          | RpsC         |                      | Monomer   | 118.7                                               | 100.2 | 77.4  | 10.4                                                            | 8.8   | 6.8   |
| P0A7V8          | RpsD         |                      | Monomer   | 123.5                                               | 104.3 | 80.6  | 11.4                                                            | 9.6   | 7.5   |
| P0A7W1          | RpsE         |                      | Monomer   | 138.2                                               | 116.8 | 90.2  | 14.7                                                            | 12.4  | 9.6   |
| P02358          | RpsF         |                      | Monomer   | 144.5                                               | 122.1 | 94.3  | 16.1                                                            | 13.6  | 10.5  |
| P02359          | RpsG         |                      | Monomer   | 131.4                                               | 111.0 | 85.8  | 13.1                                                            | 11.1  | 8.6   |
| P0A7W7          | RpsH         |                      | Monomer   | 150.7                                               | 127.3 | 98.3  | 17.6                                                            | 14.9  | 11.5  |
| P0A7X3          | RpsI         |                      | Monomer   | 147.7                                               | 124.8 | 96.4  | 16.9                                                            | 14.3  | 11.0  |
| P0A7R5          | RpsJ         |                      | Monomer   | 162.0                                               | 136.9 | 105.7 | 20.5                                                            | 17.4  | 13.4  |
| P0A7R9          | RpsK         |                      | Monomer   | 151.9                                               | 128.3 | 99.1  | 17.9                                                            | 15.1  | 11.7  |
| P0A7S3          | RpsL         |                      | Monomer   | 152.3                                               | 128.7 | 99.4  | 18.0                                                            | 15.2  | 11.8  |
| P0A7S9          | RpsM         |                      | Monomer   | 155.2                                               | 131.1 | 101.3 | 18.8                                                            | 15.9  | 12.2  |
| P0AG59          | RpsN         |                      | Monomer   | 162.9                                               | 137.6 | 106.3 | 20.8                                                            | 17.5  | 13.6  |
| P0ADZ4          | RpsO         |                      | Monomer   | 170.7                                               | 144.2 | 111.4 | 22.9                                                            | 19.3  | 14.9  |
| P0A7T3          | RpsP         |                      | Monomer   | 178.3                                               | 150.6 | 116.4 | 25.0                                                            | 21.1  | 16.3  |
| P0AG63          | RpsQ         |                      | Monomer   | 174.6                                               | 147.5 | 113.9 | 24.0                                                            | 20.2  | 15.6  |
| P0A7T7          | RpsR         |                      | Monomer   | 179.9                                               | 152.0 | 117.4 | 25.5                                                            | 21.5  | 16.6  |



| UniProtKB A. N. | Protein name | Subcellular location | Subunit               | $D_0 \left( \frac{\mu\text{m}^2}{\text{s}} \right)$ |       |       | $D_{\text{cyto}} \left( \frac{\mu\text{m}^2}{\text{s}} \right)$ |       |       |
|-----------------|--------------|----------------------|-----------------------|-----------------------------------------------------|-------|-------|-----------------------------------------------------------------|-------|-------|
|                 |              |                      |                       | 310 K                                               | 303 K | 293 K | 310 K                                                           | 303 K | 293 K |
| P0A7U3          | RpsS         |                      | Monomer               | 169.7                                               | 143.4 | 110.7 | 22.6                                                            | 19.1  | 14.8  |
| P0A7U7          | RpsT         |                      | Monomer               | 174.7                                               | 147.6 | 114.0 | 24.0                                                            | 20.3  | 15.7  |
| P68679          | RpsU         |                      | Monomer               | 183.9                                               | 155.3 | 120.0 | 26.6                                                            | 22.5  | 17.4  |
| P0A8R0          | RraA         | Cytoplasm            | Monomer               | 139.0                                               | 117.4 | 90.7  | 14.8                                                            | 12.5  | 9.7   |
|                 |              |                      | Homotrimer            | 90.3                                                | 73.8  | 59.0  | 5.5                                                             | 4.5   | 3.6   |
| P0AF90          | RraB         | Cytoplasm            | Monomer               | 144.9                                               | 122.4 | 94.6  | 16.2                                                            | 13.7  | 10.6  |
| P0AFX4          | Rsd          | Cytoplasm            | Monomer               | 136.3                                               | 115.1 | 88.9  | 14.2                                                            | 12.0  | 9.3   |
| P0AFX7          | RseA         | Cell membrane        | Monomer               | 121.8                                               | 102.9 | 79.5  | 11.1                                                            | 9.3   | 7.2   |
|                 |              |                      | Complex with SecB     | 71.8                                                | 58.7  | 46.9  | 3.1                                                             | 2.5   | 2.0   |
|                 |              |                      | Complex with TF (Tig) | 79.4                                                | 67.0  | 51.8  | 4.0                                                             | 3.3   | 2.6   |
| P0AFX9          | RseB         | Periplasm            | Monomer               | 104.7                                               | 88.5  | 68.3  | 7.8                                                             | 6.6   | 5.1   |
|                 |              |                      | Complex with SecB     | 68.7                                                | 56.1  | 44.8  | 2.7                                                             | 2.2   | 1.8   |
|                 |              |                      | Complex with TF (Tig) | 74.9                                                | 63.3  | 48.9  | 3.4                                                             | 2.9   | 2.2   |
| P46187          | RseC         | Cell inner membrane  | Monomer               | 141.3                                               | 119.4 | 92.2  | 15.4                                                            | 13.0  | 10.0  |
|                 |              |                      | Complex with SecB     | 74.3                                                | 60.7  | 48.5  | 3.3                                                             | 2.7   | 2.2   |
|                 |              |                      | Complex with TF (Tig) | 82.9                                                | 70.0  | 54.1  | 4.4                                                             | 3.7   | 2.9   |
| P0AEH1          | RseP         | Cell inner membrane  | Monomer               | 92.5                                                | 78.1  | 60.3  | 5.8                                                             | 4.9   | 3.8   |
|                 |              |                      | Complex with SecB     | 65.5                                                | 53.5  | 42.8  | 2.4                                                             | 2.0   | 1.6   |
|                 |              |                      | Complex with TF (Tig) | 70.7                                                | 59.7  | 46.1  | 2.9                                                             | 2.5   | 1.9   |
| P39286          | RsgA         |                      | Monomer               | 101.0                                               | 85.3  | 65.9  | 7.2                                                             | 6.1   | 4.7   |
| P06992          | RsmA         | Cytoplasm            | Monomer               | 111.5                                               | 94.2  | 72.8  | 9.1                                                             | 7.7   | 5.9   |
| P36929          | RsmB         | Cytoplasm            | Monomer               | 93.0                                                | 78.6  | 60.7  | 5.9                                                             | 5.0   | 3.8   |
| P39406          | RsmC         | Cytoplasm            | Monomer               | 102.6                                               | 86.7  | 67.0  | 7.5                                                             | 6.3   | 4.9   |
| P0ADX9          | RsmD         |                      | Monomer               | 127.4                                               | 107.6 | 83.1  | 12.2                                                            | 10.3  | 8.0   |
| P0AGL7          | RsmE         | Cytoplasm            | Monomer               | 116.9                                               | 98.8  | 76.3  | 10.1                                                            | 8.5   | 6.6   |
|                 |              |                      | Homodimer             | 89.1                                                | 72.8  | 58.1  | 5.3                                                             | 4.3   | 3.5   |
| P76273          | RsmF         | Cytoplasm            | Monomer               | 89.6                                                | 75.7  | 58.5  | 5.4                                                             | 4.5   | 3.5   |
| P0A6U5          | RsmG         | Cytoplasm            | Monomer               | 123.6                                               | 104.4 | 80.6  | 11.4                                                            | 9.7   | 7.5   |
| P60390          | RsmH         | Cytoplasm            | Monomer               | 105.7                                               | 89.3  | 69.0  | 8.0                                                             | 6.8   | 5.2   |
| P67087          | RsmI         | Cytoplasm            | Monomer               | 110.2                                               | 93.1  | 71.9  | 8.8                                                             | 7.4   | 5.8   |
| P38104          | RspA         |                      | Monomer               | 94.9                                                | 80.2  | 61.9  | 6.2                                                             | 5.2   | 4.0   |

| UniProtKB A. N. | Protein name | Subcellular location | Subunit               | $D_0 \left( \frac{\mu\text{m}^2}{\text{s}} \right)$ |       |       | $D_{\text{cyto}} \left( \frac{\mu\text{m}^2}{\text{s}} \right)$ |       |       |
|-----------------|--------------|----------------------|-----------------------|-----------------------------------------------------|-------|-------|-----------------------------------------------------------------|-------|-------|
|                 |              |                      |                       | 310 K                                               | 303 K | 293 K | 310 K                                                           | 303 K | 293 K |
| P38105          | RspB         |                      | Monomer               | 103.8                                               | 87.7  | 67.7  | 7.7                                                             | 6.5   | 5.0   |
| P0AFR0          | RssA         |                      | Monomer               | 108.0                                               | 91.2  | 70.4  | 8.4                                                             | 7.1   | 5.5   |
| P52108          | RstA         | Cytoplasm            | Monomer               | 117.4                                               | 99.2  | 76.6  | 10.2                                                            | 8.6   | 6.6   |
| P18392          | RstB         | Cell inner membrane  | Monomer               | 92.3                                                | 78.0  | 60.2  | 5.8                                                             | 4.9   | 3.8   |
|                 |              |                      | Complex with SecB     | 65.5                                                | 53.5  | 42.7  | 2.4                                                             | 1.9   | 1.6   |
|                 |              |                      | Complex with TF (Tig) | 70.7                                                | 59.7  | 46.1  | 2.9                                                             | 2.5   | 1.9   |
| P0AA43          | RsuA         |                      | Monomer               | 118.9                                               | 100.4 | 77.6  | 10.5                                                            | 8.9   | 6.8   |
| P46849          | RtcA         | Cytoplasm            | Monomer               | 104.5                                               | 88.3  | 68.2  | 7.8                                                             | 6.6   | 5.1   |
| P46850          | RtcB         |                      | Monomer               | 95.5                                                | 80.7  | 62.3  | 6.3                                                             | 5.3   | 4.1   |
| P38035          | RtcR         |                      | Monomer               | 85.3                                                | 72.1  | 55.7  | 4.8                                                             | 4.0   | 3.1   |
| P76446          | Rtn          | Cell inner membrane  | Monomer               | 86.3                                                | 72.9  | 56.3  | 4.9                                                             | 4.1   | 3.2   |
|                 |              |                      | Complex with SecB     | 63.6                                                | 51.9  | 41.5  | 2.2                                                             | 1.8   | 1.4   |
|                 |              |                      | Complex with TF (Tig) | 68.2                                                | 57.6  | 44.5  | 2.7                                                             | 2.2   | 1.7   |
| P55135          | RumA         |                      | Monomer               | 93.2                                                | 78.8  | 60.8  | 5.9                                                             | 5.0   | 3.9   |
| P75817          | RumB         |                      | Monomer               | 98.3                                                | 83.1  | 64.2  | 6.7                                                             | 5.7   | 4.4   |
| P0AG74          | RusA         |                      | Monomer               | 151.9                                               | 128.3 | 99.1  | 17.9                                                            | 15.1  | 11.7  |
|                 |              |                      | Homodimer             | 115.7                                               | 94.5  | 75.5  | 9.9                                                             | 8.1   | 6.4   |
| P75898          | RutA         |                      | Monomer               | 98.1                                                | 82.9  | 64.0  | 6.7                                                             | 5.7   | 4.4   |
| P75897          | RutB         |                      | Monomer               | 120.1                                               | 101.4 | 78.3  | 10.7                                                            | 9.1   | 7.0   |
| P0AFQ5          | RutC         |                      | Monomer               | 152.2                                               | 128.6 | 99.3  | 18.0                                                            | 15.2  | 11.8  |
|                 |              |                      | Homotrimer            | 99.0                                                | 80.8  | 64.6  | 6.8                                                             | 5.6   | 4.5   |
| P75895          | RutD         |                      | Monomer               | 113.8                                               | 96.1  | 74.3  | 9.5                                                             | 8.0   | 6.2   |
| P75894          | RutE         |                      | Monomer               | 127.6                                               | 107.8 | 83.3  | 12.3                                                            | 10.4  | 8.0   |
| P75893          | RutF         |                      | Monomer               | 137.8                                               | 116.4 | 89.9  | 14.5                                                            | 12.3  | 9.5   |
| P75892          | RutG         | Cell inner membrane  | Monomer               | 95.2                                                | 80.4  | 62.1  | 6.2                                                             | 5.3   | 4.1   |
|                 |              |                      | Complex with SecB     | 66.3                                                | 54.2  | 43.3  | 2.5                                                             | 2.0   | 1.6   |
|                 |              |                      | Complex with TF (Tig) | 71.7                                                | 60.6  | 46.8  | 3.0                                                             | 2.6   | 2.0   |
| P0ACU2          | RutR         |                      | Monomer               | 123.0                                               | 103.9 | 80.3  | 11.3                                                            | 9.6   | 7.4   |
|                 |              |                      | Homodimer             | 93.8                                                | 76.6  | 61.2  | 6.0                                                             | 4.9   | 3.9   |
| P0A809          | RuvA         |                      | Monomer               | 126.5                                               | 106.8 | 82.5  | 12.0                                                            | 10.2  | 7.9   |
|                 |              |                      | Homotetramer          | 73.4                                                | 60.0  | 47.9  | 3.2                                                             | 2.6   | 2.1   |

| UniProtKB A. N. | Protein name | Subcellular location | Subunit               | $D_0 \left( \frac{\mu\text{m}^2}{\text{s}} \right)$ |       |       | $D_{\text{cyto}} \left( \frac{\mu\text{m}^2}{\text{s}} \right)$ |       |       |
|-----------------|--------------|----------------------|-----------------------|-----------------------------------------------------|-------|-------|-----------------------------------------------------------------|-------|-------|
|                 |              |                      |                       | 310 K                                               | 303 K | 293 K | 310 K                                                           | 303 K | 293 K |
| P0A812          | RuvB         |                      | Monomer               | 103.1                                               | 87.1  | 67.3  | 7.5                                                             | 6.4   | 4.9   |
|                 |              |                      | Homododecamer         | 38.9                                                | 31.8  | 25.4  | 0.5                                                             | 0.4   | 0.3   |
| P0A814          | RuvC         |                      | Monomer               | 134.8                                               | 113.9 | 88.0  | 13.9                                                            | 11.7  | 9.1   |
|                 |              |                      | Homodimer             | 102.8                                               | 84.0  | 67.1  | 7.5                                                             | 6.1   | 4.9   |
| P58041          | RzoD         | Cell outer membrane  | Monomer               | 202.0                                               | 170.6 | 131.8 | 32.1                                                            | 27.1  | 20.9  |
|                 |              |                      | Complex with SecB     | 78.0                                                | 63.7  | 50.9  | 3.8                                                             | 3.1   | 2.5   |
|                 |              |                      | Complex with TF (Tig) | 88.5                                                | 74.8  | 57.8  | 5.2                                                             | 4.4   | 3.4   |
| C1P601          | RzoQ         | Cell membrane        | Monomer               | 176.3                                               | 148.9 | 115.0 | 24.4                                                            | 20.6  | 15.9  |
|                 |              |                      | Complex with SecB     | 76.9                                                | 62.8  | 50.2  | 3.6                                                             | 3.0   | 2.4   |
|                 |              |                      | Complex with TF (Tig) | 86.8                                                | 73.3  | 56.6  | 5.0                                                             | 4.2   | 3.2   |
| P58042          | RzoR         | Cell outer membrane  | Monomer               | 201.1                                               | 169.9 | 131.2 | 31.8                                                            | 26.9  | 20.8  |
|                 |              |                      | Complex with SecB     | 78.0                                                | 63.7  | 50.9  | 3.8                                                             | 3.1   | 2.5   |
|                 |              |                      | Complex with TF (Tig) | 88.5                                                | 74.7  | 57.7  | 5.2                                                             | 4.4   | 3.4   |
| P75719          | RzpD         |                      | Monomer               | 139.4                                               | 117.8 | 91.0  | 14.9                                                            | 12.6  | 9.7   |
| P76158          | RzpQ         |                      | Monomer               | 136.1                                               | 115.0 | 88.8  | 14.2                                                            | 12.0  | 9.2   |
| P77551          | RzpR         |                      | Monomer               | 141.8                                               | 119.8 | 92.5  | 15.5                                                            | 13.1  | 10.1  |
| P76149          | Sad          |                      | Monomer               | 92.0                                                | 77.7  | 60.0  | 5.7                                                             | 4.8   | 3.7   |
|                 |              |                      | Homodimer             | 70.1                                                | 57.3  | 45.8  | 2.9                                                             | 2.3   | 1.9   |
| P76136          | SafA         | Cell inner membrane  | Monomer               | 195.5                                               | 165.1 | 127.5 | 30.1                                                            | 25.4  | 19.6  |
|                 |              |                      | Complex with SecB     | 77.8                                                | 63.5  | 50.7  | 3.8                                                             | 3.1   | 2.5   |
|                 |              |                      | Complex with TF (Tig) | 88.1                                                | 74.5  | 57.5  | 5.2                                                             | 4.4   | 3.4   |
| P0AFY2          | SanA         | Cell inner membrane  | Monomer               | 116.4                                               | 98.3  | 76.0  | 10.0                                                            | 8.4   | 6.5   |
|                 |              |                      | Complex with SecB     | 71.0                                                | 58.0  | 46.3  | 3.0                                                             | 2.4   | 1.9   |
|                 |              |                      | Complex with TF (Tig) | 78.1                                                | 66.0  | 51.0  | 3.8                                                             | 3.2   | 2.5   |
| Q47622          | SapA         | Periplasm            | Monomer               | 84.6                                                | 71.5  | 55.2  | 4.7                                                             | 3.9   | 3.0   |
|                 |              |                      | Complex with SecB     | 63.0                                                | 51.5  | 41.1  | 2.1                                                             | 1.8   | 1.4   |
|                 |              |                      | Complex with TF (Tig) | 67.4                                                | 57.0  | 44.0  | 2.6                                                             | 2.2   | 1.7   |
| P0AGH3          | SapB         | Cell inner membrane  | Monomer               | 104.4                                               | 88.2  | 68.1  | 7.8                                                             | 6.6   | 5.1   |
|                 |              |                      | Complex with SecB     | 68.6                                                | 56.0  | 44.8  | 2.7                                                             | 2.2   | 1.8   |
|                 |              |                      | Complex with TF (Tig) | 74.8                                                | 63.2  | 48.8  | 3.4                                                             | 2.9   | 2.2   |
| P0AGH5          | SapC         | Cell inner membrane  | Monomer               | 110.0                                               | 92.9  | 71.8  | 8.8                                                             | 7.4   | 5.7   |

| UniProtKB A. N. | Protein name | Subcellular location | Subunit                 | $D_0 \left( \frac{\mu\text{m}^2}{\text{s}} \right)$ |       |       | $D_{\text{cyto}} \left( \frac{\mu\text{m}^2}{\text{s}} \right)$ |       |       |
|-----------------|--------------|----------------------|-------------------------|-----------------------------------------------------|-------|-------|-----------------------------------------------------------------|-------|-------|
|                 |              |                      |                         | 310 K                                               | 303 K | 293 K | 310 K                                                           | 303 K | 293 K |
|                 |              |                      | Complex with SecB       | 69.8                                                | 57.0  | 45.5  | 2.8                                                             | 2.3   | 1.8   |
|                 |              |                      | Complex with TF (Tig)   | 76.4                                                | 64.6  | 49.9  | 3.6                                                             | 3.0   | 2.3   |
| P0AAH4          | SapD         | Cell inner membrane  | Monomer                 | 102.6                                               | 86.7  | 66.9  | 7.4                                                             | 6.3   | 4.9   |
|                 |              |                      | Complex with SecB       | 68.2                                                | 55.7  | 44.5  | 2.7                                                             | 2.2   | 1.7   |
|                 |              |                      | Complex with TF (Tig)   | 74.3                                                | 62.7  | 48.5  | 3.3                                                             | 2.8   | 2.2   |
| P0AAH8          | SapF         | Cell inner membrane  | Monomer                 | 111.3                                               | 94.0  | 72.6  | 9.0                                                             | 7.6   | 5.9   |
|                 |              |                      | Complex with SecB       | 70.0                                                | 57.2  | 45.7  | 2.9                                                             | 2.3   | 1.9   |
|                 |              |                      | Complex with TF (Tig)   | 76.8                                                | 64.9  | 50.1  | 3.6                                                             | 3.1   | 2.4   |
| P04995          | SbcB         |                      | Monomer                 | 88.7                                                | 75.0  | 57.9  | 5.2                                                             | 4.4   | 3.4   |
| P13458          | SbcC         |                      | Monomer                 | 65.4                                                | 55.3  | 42.7  | 2.4                                                             | 2.0   | 1.6   |
|                 |              |                      | Heterodimer (SbcC–SbcD) | 57.7                                                | 48.7  | 37.7  | 1.7                                                             | 1.4   | 1.1   |
| P0AG76          | SbcD         |                      | Monomer                 | 95.9                                                | 81.0  | 62.6  | 6.3                                                             | 5.4   | 4.1   |
|                 |              |                      | Heterodimer (SbcC–SbcD) | 57.7                                                | 48.7  | 37.7  | 1.7                                                             | 1.4   | 1.1   |
| P27253          | Sbm          |                      | Monomer                 | 77.2                                                | 65.2  | 50.4  | 3.7                                                             | 3.1   | 2.4   |
| P0AFY6          | SbmA         | Cell inner membrane  | Monomer                 | 94.5                                                | 79.8  | 61.7  | 6.1                                                             | 5.2   | 4.0   |
|                 |              |                      | Complex with SecB       | 66.1                                                | 54.0  | 43.1  | 2.4                                                             | 2.0   | 1.6   |
|                 |              |                      | Complex with TF (Tig)   | 71.5                                                | 60.4  | 46.6  | 3.0                                                             | 2.5   | 2.0   |
| P33012          | SbmC         | Cytoplasm            | Monomer                 | 136.8                                               | 115.5 | 89.3  | 14.3                                                            | 12.1  | 9.3   |
| P0AG78          | Sbp          | Periplasm            | Monomer                 | 103.7                                               | 87.6  | 67.7  | 7.6                                                             | 6.5   | 5.0   |
|                 |              |                      | Complex with SecB       | 68.4                                                | 55.9  | 44.7  | 2.7                                                             | 2.2   | 1.8   |
|                 |              |                      | Complex with TF (Tig)   | 74.6                                                | 63.0  | 48.7  | 3.4                                                             | 2.9   | 2.2   |
| P16095          | SdaA         |                      | Monomer                 | 92.6                                                | 78.2  | 60.4  | 5.8                                                             | 4.9   | 3.8   |
| P30744          | SdaB         |                      | Monomer                 | 92.7                                                | 78.3  | 60.5  | 5.8                                                             | 4.9   | 3.8   |
| P0AAD6          | SdaC         | Cell inner membrane  | Monomer                 | 94.1                                                | 79.5  | 61.4  | 6.1                                                             | 5.1   | 4.0   |
|                 |              |                      | Complex with SecB       | 66.0                                                | 53.9  | 43.1  | 2.4                                                             | 2.0   | 1.6   |
|                 |              |                      | Complex with TF (Tig)   | 71.3                                                | 60.3  | 46.6  | 3.0                                                             | 2.5   | 2.0   |
| P0AC41          | SdhA         | Cell inner membrane  | Monomer                 | 83.1                                                | 70.2  | 54.2  | 4.5                                                             | 3.8   | 2.9   |
| P07014          | SdhB         | Cell inner membrane  | Monomer                 | 117.3                                               | 99.1  | 76.5  | 10.2                                                            | 8.6   | 6.6   |
|                 |              |                      | Complex with SecB       | 71.1                                                | 58.1  | 46.4  | 3.0                                                             | 2.4   | 1.9   |
|                 |              |                      | Complex with TF (Tig)   | 78.3                                                | 66.2  | 51.1  | 3.8                                                             | 3.2   | 2.5   |
| P69054          | SdhC         | Cell inner membrane  | Monomer                 | 150.0                                               | 126.7 | 97.9  | 17.5                                                            | 14.7  | 11.4  |

| UniProtKB A. N. | Protein name | Subcellular location             | Subunit               | $D_0 \left( \frac{\mu\text{m}^2}{\text{s}} \right)$ |       |       | $D_{\text{cyto}} \left( \frac{\mu\text{m}^2}{\text{s}} \right)$ |       |       |
|-----------------|--------------|----------------------------------|-----------------------|-----------------------------------------------------|-------|-------|-----------------------------------------------------------------|-------|-------|
|                 |              |                                  |                       | 310 K                                               | 303 K | 293 K | 310 K                                                           | 303 K | 293 K |
|                 |              |                                  | Complex with SecB     | 75.1                                                | 61.4  | 49.0  | 3.4                                                             | 2.8   | 2.2   |
|                 |              |                                  | Complex with TF (Tig) | 84.1                                                | 71.1  | 54.9  | 4.6                                                             | 3.9   | 3.0   |
| P0AC44          | SdhD         | Cell inner membrane              | Monomer               | 156.3                                               | 132.0 | 102.0 | 19.0                                                            | 16.1  | 12.4  |
|                 |              |                                  | Complex with SecB     | 75.6                                                | 61.8  | 49.3  | 3.5                                                             | 2.9   | 2.3   |
|                 |              |                                  | Complex with TF (Tig) | 84.9                                                | 71.7  | 55.4  | 4.7                                                             | 4.0   | 3.1   |
| P07026          | SdiA         |                                  | Monomer               | 115.0                                               | 97.2  | 75.1  | 9.7                                                             | 8.2   | 6.3   |
| P10408          | SecA         | Cell inner membrane              | Monomer               | 69.4                                                | 58.6  | 45.3  | 2.8                                                             | 2.4   | 1.8   |
|                 |              |                                  | Homodimer             | 52.9                                                | 43.2  | 34.5  | 1.3                                                             | 1.1   | 0.9   |
| P0AG86          | SecB         | Cytoplasm                        | Monomer               | 139.2                                               | 117.6 | 90.9  | 14.9                                                            | 12.6  | 9.7   |
|                 |              |                                  | Homotetramer          | 80.9                                                | 66.1  | 52.8  | 4.2                                                             | 3.4   | 2.7   |
| P0AG90          | SecD         | Cell inner membrane              | Monomer               | 82.0                                                | 69.3  | 53.5  | 4.3                                                             | 3.6   | 2.8   |
|                 |              |                                  | Complex with SecB     | 62.1                                                | 50.7  | 40.5  | 2.1                                                             | 1.7   | 1.3   |
|                 |              |                                  | Complex with TF (Tig) | 66.3                                                | 56.0  | 43.2  | 2.5                                                             | 2.1   | 1.6   |
| P0AG96          | SecE         | Cell inner membrane              | Monomer               | 152.7                                               | 129.0 | 99.7  | 18.2                                                            | 15.3  | 11.8  |
|                 |              |                                  | Complex with SecB     | 75.3                                                | 61.6  | 49.2  | 3.5                                                             | 2.8   | 2.3   |
|                 |              |                                  | Complex with TF (Tig) | 84.5                                                | 71.4  | 55.1  | 4.6                                                             | 3.9   | 3.0   |
| P0AG93          | SecF         | Cell inner membrane              | Monomer               | 105.1                                               | 88.8  | 68.6  | 7.9                                                             | 6.7   | 5.1   |
|                 |              |                                  | Complex with SecB     | 68.8                                                | 56.2  | 44.9  | 2.7                                                             | 2.2   | 1.8   |
|                 |              |                                  | Complex with TF (Tig) | 75.1                                                | 63.4  | 49.0  | 3.4                                                             | 2.9   | 2.2   |
| P0AG99          | SecG         | Cell inner membrane              | Monomer               | 164.1                                               | 138.6 | 107.1 | 21.1                                                            | 17.8  | 13.8  |
|                 |              |                                  | Complex with SecB     | 76.2                                                | 62.2  | 49.7  | 3.6                                                             | 2.9   | 2.3   |
|                 |              |                                  | Complex with TF (Tig) | 85.7                                                | 72.4  | 55.9  | 4.8                                                             | 4.1   | 3.1   |
| P62395          | SecM         | Cytoplasm > cytosol<br>Periplasm | Monomer               | 134.5                                               | 113.6 | 87.8  | 13.8                                                            | 11.7  | 9.0   |
| P0AGA2          | SecY         | Cell inner membrane              | Monomer               | 92.9                                                | 78.5  | 60.6  | 5.9                                                             | 5.0   | 3.8   |
|                 |              |                                  | Complex with SecB     | 65.6                                                | 53.6  | 42.8  | 2.4                                                             | 2.0   | 1.6   |
|                 |              |                                  | Complex with TF (Tig) | 70.9                                                | 59.9  | 46.3  | 2.9                                                             | 2.5   | 1.9   |
| P0A821          | SelA         | Cytoplasm                        | Monomer               | 91.4                                                | 77.2  | 59.6  | 5.6                                                             | 4.8   | 3.7   |
|                 |              |                                  | Homodecamer           | 37.0                                                | 30.3  | 24.2  | 0.4                                                             | 0.4   | 0.3   |
| P14081          | SelB         | Cytoplasm                        | Monomer               | 81.0                                                | 68.4  | 52.8  | 4.2                                                             | 3.5   | 2.7   |
| P16456          | SelD         |                                  | Monomer               | 103.6                                               | 87.6  | 67.6  | 7.6                                                             | 6.4   | 5.0   |

| UniProtKB A. N. | Protein name | Subcellular location | Subunit               | $D_0 \left( \frac{\mu\text{m}^2}{\text{s}} \right)$ |       |       | $D_{\text{cyto}} \left( \frac{\mu\text{m}^2}{\text{s}} \right)$ |       |       |
|-----------------|--------------|----------------------|-----------------------|-----------------------------------------------------|-------|-------|-----------------------------------------------------------------|-------|-------|
|                 |              |                      |                       | 310 K                                               | 303 K | 293 K | 310 K                                                           | 303 K | 293 K |
| P33667          | SelU         |                      | Monomer               | 99.1                                                | 83.7  | 64.7  | 6.9                                                             | 5.8   | 4.5   |
| P0AFY8          | SeqA         |                      | Monomer               | 130.7                                               | 110.4 | 85.3  | 13.0                                                            | 10.9  | 8.5   |
| P0A9T0          | SerA         |                      | Monomer               | 96.4                                                | 81.4  | 62.9  | 6.4                                                             | 5.4   | 4.2   |
|                 |              |                      | Homotetramer          | 56.0                                                | 45.7  | 36.5  | 1.5                                                             | 1.3   | 1.0   |
| P0AGB0          | SerB         |                      | Monomer               | 105.5                                               | 89.1  | 68.9  | 8.0                                                             | 6.7   | 5.2   |
| P23721          | SerC         | Cytoplasm            | Monomer               | 100.4                                               | 84.8  | 65.5  | 7.1                                                             | 6.0   | 4.6   |
|                 |              |                      | Homodimer             | 76.5                                                | 62.5  | 49.9  | 3.6                                                             | 2.9   | 2.4   |
| P0A8L1          | SerS         | Cytoplasm            | Monomer               | 93.0                                                | 78.5  | 60.7  | 5.9                                                             | 5.0   | 3.8   |
|                 |              |                      | Homodimer             | 70.8                                                | 57.9  | 46.2  | 2.9                                                             | 2.4   | 1.9   |
| P31675          | SetA         | Cell inner membrane  | Monomer               | 97.6                                                | 82.5  | 63.7  | 6.6                                                             | 5.6   | 4.3   |
|                 |              |                      | Complex with SecB     | 67.0                                                | 54.7  | 43.7  | 2.5                                                             | 2.1   | 1.7   |
|                 |              |                      | Complex with TF (Tig) | 72.6                                                | 61.4  | 47.4  | 3.1                                                             | 2.7   | 2.1   |
| P33026          | SetB         | Cell inner membrane  | Monomer               | 97.6                                                | 82.5  | 63.7  | 6.6                                                             | 5.6   | 4.3   |
|                 |              |                      | Complex with SecB     | 67.0                                                | 54.7  | 43.7  | 2.5                                                             | 2.1   | 1.7   |
|                 |              |                      | Complex with TF (Tig) | 72.6                                                | 61.3  | 47.4  | 3.1                                                             | 2.7   | 2.1   |
| P31436          | SetC         | Cell inner membrane  | Monomer               | 97.0                                                | 81.9  | 63.3  | 6.5                                                             | 5.5   | 4.2   |
|                 |              |                      | Complex with SecB     | 66.8                                                | 54.6  | 43.6  | 2.5                                                             | 2.1   | 1.6   |
|                 |              |                      | Complex with TF (Tig) | 72.4                                                | 61.1  | 47.2  | 3.1                                                             | 2.6   | 2.0   |
| P0AAA5          | Sfa          | Cell membrane        | Monomer               | 182.0                                               | 153.7 | 118.7 | 26.1                                                            | 22.0  | 17.0  |
|                 |              |                      | Complex with SecB     | 77.2                                                | 63.0  | 50.4  | 3.7                                                             | 3.0   | 2.4   |
|                 |              |                      | Complex with TF (Tig) | 87.3                                                | 73.7  | 56.9  | 5.0                                                             | 4.2   | 3.3   |
| P0ABW5          | SfmA         | Fimbrium             | Monomer               | 135.6                                               | 114.6 | 88.5  | 14.1                                                            | 11.9  | 9.2   |
|                 |              |                      | Complex with SecB     | 73.7                                                | 60.2  | 48.1  | 3.3                                                             | 2.7   | 2.1   |
|                 |              |                      | Complex with TF (Tig) | 82.0                                                | 69.3  | 53.5  | 4.3                                                             | 3.6   | 2.8   |
| P77249          | SfmC         | Periplasm            | Monomer               | 119.6                                               | 101.0 | 78.0  | 10.6                                                            | 9.0   | 6.9   |
|                 |              |                      | Complex with SecB     | 71.5                                                | 58.4  | 46.7  | 3.0                                                             | 2.5   | 2.0   |
|                 |              |                      | Complex with TF (Tig) | 78.9                                                | 66.6  | 51.5  | 3.9                                                             | 3.3   | 2.5   |
| P77468          | SfmD         | Cell outer membrane  | Monomer               | 71.2                                                | 60.1  | 46.4  | 3.0                                                             | 2.5   | 1.9   |
|                 |              |                      | Complex with SecB     | 57.5                                                | 47.0  | 37.5  | 1.7                                                             | 1.4   | 1.1   |
|                 |              |                      | Complex with TF (Tig) | 60.7                                                | 51.2  | 39.6  | 1.9                                                             | 1.6   | 1.3   |
| P38052          | SfmF         | Fimbrium             | Monomer               | 136.4                                               | 115.2 | 89.0  | 14.2                                                            | 12.0  | 9.3   |

| UniProtKB A. N. | Protein name | Subcellular location | Subunit               | $D_0 \left( \frac{\mu\text{m}^2}{\text{s}} \right)$ |       |       | $D_{\text{cyto}} \left( \frac{\mu\text{m}^2}{\text{s}} \right)$ |       |       |
|-----------------|--------------|----------------------|-----------------------|-----------------------------------------------------|-------|-------|-----------------------------------------------------------------|-------|-------|
|                 |              |                      |                       | 310 K                                               | 303 K | 293 K | 310 K                                                           | 303 K | 293 K |
|                 |              |                      | Complex with SecB     | 73.8                                                | 60.3  | 48.1  | 3.3                                                             | 2.7   | 2.1   |
|                 |              |                      | Complex with TF (Tig) | 82.1                                                | 69.4  | 53.6  | 4.3                                                             | 3.6   | 2.8   |
| P75715          | SfmH         | Fimbrium             | Monomer               | 104.8                                               | 88.5  | 68.4  | 7.8                                                             | 6.6   | 5.1   |
|                 |              |                      | Complex with SecB     | 68.7                                                | 56.1  | 44.8  | 2.7                                                             | 2.2   | 1.8   |
|                 |              |                      | Complex with TF (Tig) | 74.9                                                | 63.3  | 48.9  | 3.4                                                             | 2.9   | 2.2   |
| P0A823          | SfsA         |                      | Monomer               | 118.2                                               | 99.9  | 77.1  | 10.3                                                            | 8.7   | 6.8   |
| P0ACH1          | SfsB         |                      | Monomer               | 169.3                                               | 143.0 | 110.5 | 22.5                                                            | 19.0  | 14.7  |
| P37680          | SgbE         |                      | Monomer               | 119.4                                               | 100.9 | 77.9  | 10.6                                                            | 8.9   | 6.9   |
| P37678          | SgbH         |                      | Monomer               | 123.5                                               | 104.4 | 80.6  | 11.4                                                            | 9.7   | 7.5   |
|                 |              |                      | Homodimer             | 94.1                                                | 76.9  | 61.4  | 6.1                                                             | 5.0   | 4.0   |
| P37679          | SgbU         |                      | Monomer               | 108.7                                               | 91.9  | 71.0  | 8.5                                                             | 7.2   | 5.6   |
| P39363          | SgcA         | Cytoplasm            | Monomer               | 144.8                                               | 122.3 | 94.5  | 16.2                                                            | 13.7  | 10.6  |
| P58035          | SgcB         | Cytoplasm            | Monomer               | 173.9                                               | 146.9 | 113.5 | 23.8                                                            | 20.1  | 15.5  |
| P39365          | SgcC         | Cell inner membrane  | Monomer               | 94.3                                                | 79.7  | 61.5  | 6.1                                                             | 5.1   | 4.0   |
|                 |              |                      | Complex with SecB     | 66.0                                                | 54.0  | 43.1  | 2.4                                                             | 2.0   | 1.6   |
|                 |              |                      | Complex with TF (Tig) | 71.4                                                | 60.3  | 46.6  | 3.0                                                             | 2.5   | 2.0   |
| P39362          | SgcE         |                      | Monomer               | 124.0                                               | 104.8 | 80.9  | 11.5                                                            | 9.7   | 7.5   |
| P39364          | SgcQ         |                      | Monomer               | 113.1                                               | 95.6  | 73.8  | 9.4                                                             | 7.9   | 6.1   |
| P39361          | SgcR         |                      | Monomer               | 113.2                                               | 95.7  | 73.9  | 9.4                                                             | 7.9   | 6.1   |
| P39366          | SgcX         |                      | Monomer               | 99.6                                                | 84.1  | 65.0  | 6.9                                                             | 5.9   | 4.5   |
| P33595          | SgrR         |                      | Monomer               | 83.3                                                | 70.4  | 54.4  | 4.5                                                             | 3.8   | 2.9   |
| C1P5Z7          | SgrT         |                      | Monomer               | 220.6                                               | 186.4 | 144.0 | 38.1                                                            | 32.2  | 24.9  |
| P76350          | ShiA         | Cell inner membrane  | Monomer               | 93.4                                                | 78.9  | 61.0  | 5.9                                                             | 5.0   | 3.9   |
|                 |              |                      | Complex with SecB     | 65.8                                                | 53.8  | 42.9  | 2.4                                                             | 2.0   | 1.6   |
|                 |              |                      | Complex with TF (Tig) | 71.1                                                | 60.1  | 46.4  | 3.0                                                             | 2.5   | 1.9   |
| C1P611          | ShoB         | Membrane             | Monomer               | 272.9                                               | 230.6 | 178.1 | 56.7                                                            | 47.9  | 37.0  |
|                 |              |                      | Complex with SecB     | 79.5                                                | 64.9  | 51.9  | 4.0                                                             | 3.2   | 2.6   |
|                 |              |                      | Complex with TF (Tig) | 90.9                                                | 76.8  | 59.3  | 5.6                                                             | 4.7   | 3.6   |
| P38392          | SieB         | Cell inner membrane  | Monomer               | 133.5                                               | 112.8 | 87.1  | 13.6                                                            | 11.5  | 8.9   |
|                 |              |                      | Complex with SecB     | 73.4                                                | 60.0  | 47.9  | 3.2                                                             | 2.6   | 2.1   |
|                 |              |                      | Complex with TF (Tig) | 81.6                                                | 69.0  | 53.3  | 4.3                                                             | 3.6   | 2.8   |

| UniProtKB A. N. | Protein name | Subcellular location | Subunit               | $D_0 \left( \frac{\mu\text{m}^2}{\text{s}} \right)$ |       |       | $D_{\text{cyto}} \left( \frac{\mu\text{m}^2}{\text{s}} \right)$ |       |       |
|-----------------|--------------|----------------------|-----------------------|-----------------------------------------------------|-------|-------|-----------------------------------------------------------------|-------|-------|
|                 |              |                      |                       | 310 K                                               | 303 K | 293 K | 310 K                                                           | 303 K | 293 K |
| P0AGM5          | SirB1        |                      | Monomer               | 110.9                                               | 93.7  | 72.4  | 8.9                                                             | 7.6   | 5.8   |
|                 |              |                      | Monomer               | 148.6                                               | 125.5 | 97.0  | 17.1                                                            | 14.5  | 11.2  |
| Q46755          | SirB2        | Cell inner membrane  | Complex with SecB     | 75.0                                                | 61.3  | 48.9  | 3.4                                                             | 2.8   | 2.2   |
|                 |              |                      | Complex with TF (Tig) | 83.9                                                | 70.9  | 54.8  | 4.6                                                             | 3.9   | 3.0   |
| P76502          | SixA         |                      | Monomer               | 139.5                                               | 117.8 | 91.0  | 14.9                                                            | 12.6  | 9.7   |
|                 |              |                      | Monomer               | 138.0                                               | 116.5 | 90.0  | 14.6                                                            | 12.3  | 9.5   |
| P0AEU7          | Skp          | Periplasm            | Complex with SecB     | 74.0                                                | 60.4  | 48.3  | 3.3                                                             | 2.7   | 2.2   |
|                 |              |                      | Complex with TF (Tig) | 82.4                                                | 69.6  | 53.8  | 4.4                                                             | 3.7   | 2.8   |
|                 |              | Cytoplasm > nucleoid | Monomer               | 124.8                                               | 105.4 | 81.4  | 11.7                                                            | 9.9   | 7.6   |
|                 |              |                      | Monomer               | 129.1                                               | 109.0 | 84.2  | 12.6                                                            | 10.6  | 8.2   |
| P37194          | Slp          | Cell outer membrane  | Complex with SecB     | 72.9                                                | 59.5  | 47.6  | 3.2                                                             | 2.6   | 2.1   |
|                 |              |                      | Complex with TF (Tig) | 80.8                                                | 68.3  | 52.8  | 4.1                                                             | 3.5   | 2.7   |
|                 |              |                      | Monomer               | 79.0                                                | 66.7  | 51.5  | 3.9                                                             | 3.3   | 2.6   |
| P0AGC3          | Slr          | Periplasm            | Complex with SecB     | 60.9                                                | 49.7  | 39.7  | 2.0                                                             | 1.6   | 1.3   |
|                 |              |                      | Complex with TF (Tig) | 64.8                                                | 54.7  | 42.3  | 2.3                                                             | 2.0   | 1.5   |
|                 |              |                      | Monomer               | 142.3                                               | 120.2 | 92.8  | 15.6                                                            | 13.2  | 10.2  |
| P0A8W2          | SlyA         |                      | Homodimer             | 108.4                                               | 88.6  | 70.7  | 8.5                                                             | 6.9   | 5.5   |
|                 |              |                      | Monomer               | 144.9                                               | 122.4 | 94.6  | 16.2                                                            | 13.7  | 10.6  |
| P0A905          | SlyB         | Cell outer membrane  | Complex with SecB     | 74.7                                                | 61.0  | 48.7  | 3.4                                                             | 2.8   | 2.2   |
|                 |              |                      | Complex with TF (Tig) | 83.4                                                | 70.5  | 54.4  | 4.5                                                             | 3.8   | 2.9   |
| P0A9K9          | SlyD         | Cytoplasm            | Monomer               | 129.3                                               | 109.3 | 84.4  | 12.7                                                            | 10.7  | 8.3   |
| P0A8R4          | SlyX         |                      | Monomer               | 186.3                                               | 157.4 | 121.6 | 27.3                                                            | 23.1  | 17.8  |
| P30852          | Smf          |                      | Monomer               | 99.3                                                | 83.9  | 64.8  | 6.9                                                             | 5.8   | 4.5   |
| P0A828          | Smg          |                      | Monomer               | 135.5                                               | 114.5 | 88.4  | 14.0                                                            | 11.9  | 9.2   |
|                 |              |                      | Monomer               | 122.2                                               | 103.3 | 79.8  | 11.2                                                            | 9.4   | 7.3   |
| P0AGC7          | Smp          | Cell membrane        | Complex with SecB     | 71.9                                                | 58.8  | 46.9  | 3.1                                                             | 2.5   | 2.0   |
|                 |              |                      | Complex with TF (Tig) | 79.5                                                | 67.1  | 51.8  | 4.0                                                             | 3.4   | 2.6   |
|                 |              |                      | Monomer               | 159.1                                               | 134.4 | 103.8 | 19.8                                                            | 16.7  | 12.9  |
| P0A937          | SmpA         | Cell outer membrane  | Complex with SecB     | 75.8                                                | 61.9  | 49.5  | 3.5                                                             | 2.9   | 2.3   |
|                 |              |                      | Complex with TF (Tig) | 85.2                                                | 72.0  | 55.6  | 4.7                                                             | 4.0   | 3.1   |



| UniProtKB A. N. | Protein name | Subcellular location | Subunit               | $D_0 \left( \frac{\mu\text{m}^2}{\text{s}} \right)$ |       |       | $D_{\text{cyto}} \left( \frac{\mu\text{m}^2}{\text{s}} \right)$ |       |       |
|-----------------|--------------|----------------------|-----------------------|-----------------------------------------------------|-------|-------|-----------------------------------------------------------------|-------|-------|
|                 |              |                      |                       | 310 K                                               | 303 K | 293 K | 310 K                                                           | 303 K | 293 K |
| P0A832          | SmpB         | Cytoplasm            | Monomer               | 136.2                                               | 115.1 | 88.9  | 14.2                                                            | 12.0  | 9.3   |
| P36566          | SmtA         |                      | Monomer               | 112.4                                               | 95.0  | 73.4  | 9.2                                                             | 7.8   | 6.0   |
| P00448          | SodA         |                      | Monomer               | 124.3                                               | 105.0 | 81.1  | 11.6                                                            | 9.8   | 7.6   |
|                 |              |                      | Homodimer             | 94.7                                                | 77.4  | 61.8  | 6.1                                                             | 5.0   | 4.0   |
| P0AGD3          | SodB         |                      | Monomer               | 128.3                                               | 108.4 | 83.8  | 12.4                                                            | 10.5  | 8.1   |
|                 |              |                      | Homodimer             | 97.8                                                | 79.9  | 63.8  | 6.6                                                             | 5.4   | 4.3   |
| P0AGD1          | SodC         | Periplasm            | Monomer               | 138.0                                               | 116.6 | 90.0  | 14.6                                                            | 12.3  | 9.5   |
|                 |              |                      | Complex with SecB     | 74.0                                                | 60.4  | 48.3  | 3.3                                                             | 2.7   | 2.2   |
|                 |              |                      | Complex with TF (Tig) | 82.4                                                | 69.6  | 53.8  | 4.4                                                             | 3.7   | 2.8   |
| P15373          | SohA         | Cytoplasm            | Monomer               | 158.8                                               | 134.1 | 103.6 | 19.7                                                            | 16.6  | 12.9  |
|                 |              |                      | Homodimer             | 121.0                                               | 98.8  | 79.0  | 10.9                                                            | 8.9   | 7.1   |
| P0AG14          | SohB         | Cell inner membrane  | Monomer               | 100.8                                               | 85.2  | 65.8  | 7.1                                                             | 6.0   | 4.7   |
|                 |              |                      | Complex with SecB     | 67.8                                                | 55.4  | 44.2  | 2.6                                                             | 2.1   | 1.7   |
|                 |              |                      | Complex with TF (Tig) | 73.7                                                | 62.3  | 48.1  | 3.3                                                             | 2.8   | 2.1   |
| P40874          | SolA         |                      | Monomer               | 99.3                                                | 83.9  | 64.8  | 6.9                                                             | 5.8   | 4.5   |
| P31122          | SotB         | Cell inner membrane  | Monomer               | 97.8                                                | 82.6  | 63.8  | 6.6                                                             | 5.6   | 4.3   |
|                 |              |                      | Complex with SecB     | 67.0                                                | 54.7  | 43.7  | 2.5                                                             | 2.1   | 1.7   |
|                 |              |                      | Complex with TF (Tig) | 72.7                                                | 61.4  | 47.4  | 3.2                                                             | 2.7   | 2.1   |
| P0ACS2          | SoxR         |                      | Monomer               | 139.6                                               | 118.0 | 91.1  | 15.0                                                            | 12.7  | 9.8   |
|                 |              |                      | Homodimer             | 106.4                                               | 86.9  | 69.4  | 8.1                                                             | 6.6   | 5.3   |
| P0A9E2          | SoxS         | Cytoplasm            | Monomer               | 156.1                                               | 131.9 | 101.8 | 19.0                                                            | 16.0  | 12.4  |
| P21170          | SpeA         | Periplasm            | Monomer               | 78.8                                                | 66.5  | 51.4  | 3.9                                                             | 3.3   | 2.5   |
|                 |              |                      | Complex with SecB     | 60.8                                                | 49.7  | 39.7  | 1.9                                                             | 1.6   | 1.3   |
|                 |              |                      | Complex with TF (Tig) | 64.7                                                | 54.7  | 42.2  | 2.3                                                             | 1.9   | 1.5   |
| P60651          | SpeB         |                      | Monomer               | 107.3                                               | 90.7  | 70.0  | 8.3                                                             | 7.0   | 5.4   |
| P21169          | SpeC         |                      | Monomer               | 76.6                                                | 64.7  | 50.0  | 3.6                                                             | 3.0   | 2.4   |
| P0A7F6          | SpeD         |                      | Monomer               | 111.6                                               | 94.3  | 72.8  | 9.1                                                             | 7.7   | 5.9   |
| P09158          | SpeE         |                      | Monomer               | 108.9                                               | 92.0  | 71.1  | 8.6                                                             | 7.2   | 5.6   |
|                 |              |                      | Homodimer             | 83.0                                                | 67.8  | 54.2  | 4.4                                                             | 3.6   | 2.9   |
| P24169          | SpeF         |                      | Monomer               | 75.5                                                | 63.8  | 49.2  | 3.5                                                             | 2.9   | 2.3   |
| P0A951          | SpeG         | Cytoplasm            | Monomer               | 126.9                                               | 107.2 | 82.8  | 12.1                                                            | 10.3  | 7.9   |

| UniProtKB A. N. | Protein name | Subcellular location | Subunit               | $D_0 \left( \frac{\mu\text{m}^2}{\text{s}} \right)$ |       |       | $D_{\text{cyto}} \left( \frac{\mu\text{m}^2}{\text{s}} \right)$ |       |       |
|-----------------|--------------|----------------------|-----------------------|-----------------------------------------------------|-------|-------|-----------------------------------------------------------------|-------|-------|
|                 |              |                      |                       | 310 K                                               | 303 K | 293 K | 310 K                                                           | 303 K | 293 K |
|                 |              |                      | Homotetramer          | 73.7                                                | 60.2  | 48.1  | 3.3                                                             | 2.7   | 2.1   |
| P0AG24          | SpoT         | Cytoplasm            | Monomer               | 76.6                                                | 64.7  | 50.0  | 3.6                                                             | 3.1   | 2.4   |
|                 |              |                      | Monomer               | 81.7                                                | 69.1  | 53.3  | 4.3                                                             | 3.6   | 2.8   |
| P08395          | SppA         | Cell inner membrane  | Complex with SecB     | 62.0                                                | 50.6  | 40.4  | 2.0                                                             | 1.7   | 1.3   |
|                 |              |                      | Complex with TF (Tig) | 66.1                                                | 55.9  | 43.2  | 2.4                                                             | 2.1   | 1.6   |
|                 |              |                      | Monomer               | 128.9                                               | 108.9 | 84.1  | 12.6                                                            | 10.6  | 8.2   |
| P0AFV4          | Spr          | Cell membrane        | Complex with SecB     | 72.9                                                | 59.5  | 47.5  | 3.2                                                             | 2.6   | 2.1   |
|                 |              |                      | Complex with TF (Tig) | 80.8                                                | 68.3  | 52.7  | 4.1                                                             | 3.5   | 2.7   |
| P39902          | SprT         | Cytoplasm            | Monomer               | 133.2                                               | 112.5 | 86.9  | 13.5                                                            | 11.4  | 8.8   |
|                 |              |                      | Monomer               | 136.4                                               | 115.3 | 89.0  | 14.2                                                            | 12.0  | 9.3   |
| P77754          | Spy          | Periplasm            | Complex with SecB     | 73.8                                                | 60.3  | 48.1  | 3.3                                                             | 2.7   | 2.1   |
|                 |              |                      | Complex with TF (Tig) | 82.1                                                | 69.4  | 53.6  | 4.3                                                             | 3.7   | 2.8   |
| P68191          | Sra          |                      | Monomer               | 224.7                                               | 189.8 | 146.6 | 39.4                                                            | 33.3  | 25.7  |
|                 |              |                      | Monomer               | 130.0                                               | 109.8 | 84.8  | 12.8                                                            | 10.8  | 8.4   |
| P56579          | SrlA         | Cell inner membrane  | Complex with SecB     | 73.0                                                | 59.6  | 47.6  | 3.2                                                             | 2.6   | 2.1   |
|                 |              |                      | Complex with TF (Tig) | 81.0                                                | 68.4  | 52.9  | 4.2                                                             | 3.5   | 2.7   |
| P05706          | SrlB         | Cytoplasm            | Monomer               | 154.3                                               | 130.3 | 100.7 | 18.5                                                            | 15.7  | 12.1  |
|                 |              |                      | Monomer               | 115.5                                               | 97.5  | 75.3  | 9.8                                                             | 8.3   | 6.4   |
| P05707          | SrlD         |                      | Homotetramer          | 67.1                                                | 54.8  | 43.8  | 2.5                                                             | 2.1   | 1.7   |
|                 |              |                      | Monomer               | 107.6                                               | 90.9  | 70.2  | 8.3                                                             | 7.0   | 5.4   |
| P56580          | SrlE         | Cell inner membrane  | Complex with SecB     | 69.3                                                | 56.6  | 45.2  | 2.8                                                             | 2.3   | 1.8   |
|                 |              |                      | Complex with TF (Tig) | 75.8                                                | 64.0  | 49.5  | 3.5                                                             | 3.0   | 2.3   |
| P15082          | SrlR         |                      | Monomer               | 114.8                                               | 97.0  | 74.9  | 9.7                                                             | 8.2   | 6.3   |
| P21507          | SrmB         |                      | Monomer               | 91.9                                                | 77.6  | 59.9  | 5.7                                                             | 4.8   | 3.7   |
|                 |              |                      | Monomer               | 134.2                                               | 113.4 | 87.6  | 13.7                                                            | 11.6  | 9.0   |
| P0AGE0          | Ssb          |                      | Homotetramer          | 77.9                                                | 63.7  | 50.9  | 3.8                                                             | 3.1   | 2.5   |
| P31142          | SseA         | Cytoplasm            | Monomer               | 111.0                                               | 93.8  | 72.4  | 9.0                                                             | 7.6   | 5.8   |
| P0AFZ1          | SseB         |                      | Monomer               | 114.2                                               | 96.5  | 74.5  | 9.6                                                             | 8.1   | 6.2   |
| Q46812          | SsnA         |                      | Monomer               | 92.6                                                | 78.3  | 60.5  | 5.8                                                             | 4.9   | 3.8   |
| P0ACA3          | SspA         |                      | Monomer               | 121.8                                               | 102.9 | 79.5  | 11.1                                                            | 9.4   | 7.2   |
| P0AFZ3          | SspB         |                      | Monomer               | 136.2                                               | 115.1 | 88.9  | 14.2                                                            | 12.0  | 9.3   |

| UniProtKB A. N. | Protein name | Subcellular location | Subunit                                                | $D_0 \left( \frac{\mu\text{m}^2}{\text{s}} \right)$ |       |       | $D_{\text{cyto}} \left( \frac{\mu\text{m}^2}{\text{s}} \right)$ |       |       |
|-----------------|--------------|----------------------|--------------------------------------------------------|-----------------------------------------------------|-------|-------|-----------------------------------------------------------------|-------|-------|
|                 |              |                      |                                                        | 310 K                                               | 303 K | 293 K | 310 K                                                           | 303 K | 293 K |
| P0AGE4          | SstT         | Cell inner membrane  | Monomer                                                | 97.0                                                | 81.9  | 63.3  | 6.5                                                             | 5.5   | 4.2   |
|                 |              |                      | Complex with SecB                                      | 66.8                                                | 54.6  | 43.6  | 2.5                                                             | 2.1   | 1.6   |
|                 |              |                      | Complex with TF (Tig)                                  | 72.4                                                | 61.2  | 47.2  | 3.1                                                             | 2.6   | 2.0   |
| P75853          | SsuA         | Periplasm            | Monomer                                                | 106.1                                               | 89.6  | 69.2  | 8.1                                                             | 6.8   | 5.3   |
|                 |              |                      | Complex with SecB                                      | 69.0                                                | 56.3  | 45.0  | 2.7                                                             | 2.2   | 1.8   |
|                 |              |                      | Complex with TF (Tig)                                  | 75.3                                                | 63.7  | 49.2  | 3.5                                                             | 2.9   | 2.3   |
| P0AAI1          | SsuB         | Cell inner membrane  | Monomer                                                | 115.7                                               | 97.7  | 75.5  | 9.8                                                             | 8.3   | 6.4   |
|                 |              |                      | Complex with SecB                                      | 70.8                                                | 57.9  | 46.2  | 2.9                                                             | 2.4   | 1.9   |
|                 |              |                      | Complex with TF (Tig)                                  | 77.9                                                | 65.8  | 50.9  | 3.8                                                             | 3.2   | 2.5   |
| P75851          | SsuC         | Cell inner membrane  | Monomer                                                | 113.8                                               | 96.1  | 74.2  | 9.5                                                             | 8.0   | 6.2   |
|                 |              |                      | Complex with SecB                                      | 70.5                                                | 57.6  | 46.0  | 2.9                                                             | 2.4   | 1.9   |
|                 |              |                      | Complex with TF (Tig)                                  | 77.5                                                | 65.4  | 50.5  | 3.7                                                             | 3.1   | 2.4   |
| P80645          | SsuD         |                      | Monomer                                                | 98.5                                                | 83.2  | 64.3  | 6.8                                                             | 5.7   | 4.4   |
|                 |              |                      | Homotetramer                                           | 57.2                                                | 46.7  | 37.3  | 1.6                                                             | 1.3   | 1.1   |
| P80644          | SsuE         |                      | Monomer                                                | 128.4                                               | 108.5 | 83.8  | 12.5                                                            | 10.5  | 8.1   |
|                 |              |                      | Homodimer                                              | 97.8                                                | 79.9  | 63.8  | 6.7                                                             | 5.4   | 4.3   |
| P33227          | StfE         |                      | Monomer                                                | 137.6                                               | 116.3 | 89.8  | 14.5                                                            | 12.3  | 9.5   |
| P77515          | StfQ         |                      | Monomer                                                | 108.2                                               | 91.4  | 70.6  | 8.4                                                             | 7.1   | 5.5   |
| P76072          | StfR         |                      | Monomer                                                | 66.5                                                | 56.2  | 43.4  | 2.5                                                             | 2.1   | 1.6   |
| P27306          | SthA         | Cytoplasm            | Monomer                                                | 90.7                                                | 76.6  | 59.2  | 5.5                                                             | 4.7   | 3.6   |
|                 |              |                      | Homooctamer                                            | 40.1                                                | 32.8  | 26.2  | 0.6                                                             | 0.5   | 0.4   |
| P0ACG1          | StpA         |                      | Monomer                                                | 145.8                                               | 123.2 | 95.2  | 16.5                                                            | 13.9  | 10.7  |
| P0AFG3          | SucA         |                      | Monomer                                                | 68.6                                                | 58.0  | 44.8  | 2.7                                                             | 2.3   | 1.8   |
|                 |              |                      | Homodimer                                              | 52.3                                                | 42.7  | 34.1  | 1.3                                                             | 1.0   | 0.8   |
| P0AFG6          | SucB         |                      | Monomer                                                | 96.5                                                | 81.5  | 63.0  | 6.4                                                             | 5.4   | 4.2   |
| P0A836          | SucC         |                      | Monomer                                                | 98.9                                                | 83.5  | 64.5  | 6.8                                                             | 5.8   | 4.4   |
|                 |              |                      | Heterotetramer (SucC <sub>2</sub> -SucD <sub>2</sub> ) | 60.9                                                | 51.5  | 39.8  | 2.0                                                             | 1.7   | 1.3   |
| P0AGE9          | SucD         |                      | Monomer                                                | 112.5                                               | 95.0  | 73.4  | 9.2                                                             | 7.8   | 6.0   |
|                 |              |                      | Heterotetramer (SucC <sub>2</sub> -SucD <sub>2</sub> ) | 60.9                                                | 51.5  | 39.8  | 2.0                                                             | 1.7   | 1.3   |
| P77667          | SufA         |                      | Monomer                                                | 154.3                                               | 130.3 | 100.7 | 18.5                                                            | 15.7  | 12.1  |
| P77522          | SufB         |                      | Monomer                                                | 88.6                                                | 74.8  | 57.8  | 5.2                                                             | 4.4   | 3.4   |

| UniProtKB A. N. | Protein name | Subcellular location | Subunit               | $D_0 \left( \frac{\mu\text{m}^2}{\text{s}} \right)$ |       |       | $D_{\text{cyto}} \left( \frac{\mu\text{m}^2}{\text{s}} \right)$ |       |       |
|-----------------|--------------|----------------------|-----------------------|-----------------------------------------------------|-------|-------|-----------------------------------------------------------------|-------|-------|
|                 |              |                      |                       | 310 K                                               | 303 K | 293 K | 310 K                                                           | 303 K | 293 K |
| P77499          | SufC         | Cytoplasm            | Monomer               | 115.9                                               | 97.9  | 75.6  | 9.9                                                             | 8.4   | 6.5   |
| P77689          | SufD         |                      | Monomer               | 94.2                                                | 79.6  | 61.5  | 6.1                                                             | 5.1   | 4.0   |
|                 |              |                      | Homodimer             | 71.8                                                | 58.6  | 46.8  | 3.0                                                             | 2.5   | 2.0   |
| P76194          | SufE         | Cytoplasm            | Monomer               | 144.2                                               | 121.8 | 94.1  | 16.1                                                            | 13.6  | 10.5  |
|                 |              |                      | Homodimer             | 109.9                                               | 89.8  | 71.7  | 8.8                                                             | 7.1   | 5.7   |
| P26648          | SufI         | Periplasm            | Monomer               | 90.5                                                | 76.5  | 59.1  | 5.5                                                             | 4.6   | 3.6   |
|                 |              |                      | Complex with SecB     | 64.9                                                | 53.0  | 42.4  | 2.3                                                             | 1.9   | 1.5   |
|                 |              |                      | Complex with TF (Tig) | 69.9                                                | 59.1  | 45.6  | 2.8                                                             | 2.4   | 1.9   |
| P77444          | SufS         | Cytoplasm            | Monomer               | 96.1                                                | 81.2  | 62.7  | 6.4                                                             | 5.4   | 4.2   |
|                 |              |                      | Homodimer             | 73.3                                                | 59.9  | 47.8  | 3.2                                                             | 2.6   | 2.1   |
| P69937          | SugE         | Cell inner membrane  | Monomer               | 166.8                                               | 140.9 | 108.8 | 21.8                                                            | 18.4  | 14.2  |
|                 |              |                      | Complex with SecB     | 76.3                                                | 62.4  | 49.8  | 3.6                                                             | 2.9   | 2.3   |
|                 |              |                      | Complex with TF (Tig) | 86.0                                                | 72.6  | 56.1  | 4.8                                                             | 4.1   | 3.2   |
| P0ADG4          | SuhB         |                      | Monomer               | 113.4                                               | 95.8  | 74.0  | 9.4                                                             | 7.9   | 6.1   |
| P0AFZ5          | SulA         |                      | Monomer               | 134.7                                               | 113.8 | 87.9  | 13.8                                                            | 11.7  | 9.0   |
| P75792          | SupH         |                      | Monomer               | 111.6                                               | 94.2  | 72.8  | 9.1                                                             | 7.7   | 5.9   |
| P0ABZ6          | SurA         | Periplasm            | Monomer               | 93.8                                                | 79.3  | 61.2  | 6.0                                                             | 5.1   | 3.9   |
|                 |              |                      | Complex with SecB     | 65.9                                                | 53.8  | 43.0  | 2.4                                                             | 2.0   | 1.6   |
|                 |              |                      | Complex with TF (Tig) | 71.2                                                | 60.2  | 46.5  | 3.0                                                             | 2.5   | 2.0   |
| P0A840          | SurE         | Cytoplasm            | Monomer               | 117.0                                               | 98.9  | 76.4  | 10.1                                                            | 8.5   | 6.6   |
| P75869          | Sxy          |                      | Monomer               | 122.1                                               | 103.2 | 79.7  | 11.1                                                            | 9.4   | 7.3   |
| P0A8U0          | Syd          | Cell inner membrane  | Monomer               | 129.7                                               | 109.6 | 84.6  | 12.7                                                            | 10.8  | 8.3   |
| P39394          | SymE         | Cytoplasm            | Monomer               | 159.6                                               | 134.8 | 104.1 | 19.9                                                            | 16.8  | 13.0  |
| P68398          | TadA         |                      | Monomer               | 134.9                                               | 114.0 | 88.0  | 13.9                                                            | 11.7  | 9.1   |
|                 |              |                      | Homodimer             | 102.8                                               | 84.0  | 67.1  | 7.5                                                             | 6.1   | 4.9   |
| P05100          | Tag          |                      | Monomer               | 128.7                                               | 108.8 | 84.0  | 12.5                                                            | 10.6  | 8.2   |
| P0A867          | TalA         | Cytoplasm            | Monomer               | 104.8                                               | 88.5  | 68.4  | 7.8                                                             | 6.6   | 5.1   |
| P0A870          | TalB         | Cytoplasm            | Monomer               | 105.3                                               | 89.0  | 68.7  | 7.9                                                             | 6.7   | 5.2   |
|                 |              |                      | Homodimer             | 80.3                                                | 65.6  | 52.4  | 4.1                                                             | 3.3   | 2.7   |
| P76145          | Tam          | Cytoplasm            | Monomer               | 113.6                                               | 96.0  | 74.2  | 9.5                                                             | 8.0   | 6.2   |
| P07018          | Tap          | Cell inner membrane  | Monomer               | 86.9                                                | 73.4  | 56.7  | 5.0                                                             | 4.2   | 3.2   |

| UniProtKB A. N. | Protein name | Subcellular location | Subunit               | $D_0 \left( \frac{\mu\text{m}^2}{\text{s}} \right)$ |       |       | $D_{\text{cyto}} \left( \frac{\mu\text{m}^2}{\text{s}} \right)$ |       |       |
|-----------------|--------------|----------------------|-----------------------|-----------------------------------------------------|-------|-------|-----------------------------------------------------------------|-------|-------|
|                 |              |                      |                       | 310 K                                               | 303 K | 293 K | 310 K                                                           | 303 K | 293 K |
|                 |              |                      | Complex with SecB     | 63.8                                                | 52.1  | 41.6  | 2.2                                                             | 1.8   | 1.4   |
|                 |              |                      | Complex with TF (Tig) | 68.5                                                | 57.8  | 44.7  | 2.7                                                             | 2.3   | 1.8   |
| P07017          | Tar          | Cell inner membrane  | Monomer               | 85.5                                                | 72.2  | 55.8  | 4.8                                                             | 4.0   | 3.1   |
|                 |              |                      | Complex with SecB     | 63.3                                                | 51.7  | 41.3  | 2.2                                                             | 1.8   | 1.4   |
|                 |              |                      | Complex with TF (Tig) | 67.8                                                | 57.3  | 44.3  | 2.6                                                             | 2.2   | 1.7   |
| P0A9T4          | Tas          |                      | Monomer               | 101.7                                               | 85.9  | 66.4  | 7.3                                                             | 6.2   | 4.8   |
| P69428          | TatA         | Cell inner membrane  | Monomer               | 174.8                                               | 147.7 | 114.1 | 24.0                                                            | 20.3  | 15.7  |
|                 |              |                      | Monomer               | 135.8                                               | 114.7 | 88.6  | 14.1                                                            | 11.9  | 9.2   |
| P69425          | TatB         | Cell inner membrane  | Complex with SecB     | 73.7                                                | 60.2  | 48.1  | 3.3                                                             | 2.7   | 2.1   |
|                 |              |                      | Complex with TF (Tig) | 82.0                                                | 69.3  | 53.5  | 4.3                                                             | 3.6   | 2.8   |
|                 |              |                      | Monomer               | 113.8                                               | 96.2  | 74.3  | 9.5                                                             | 8.0   | 6.2   |
| P69423          | TatC         | Cell inner membrane  | Complex with SecB     | 70.5                                                | 57.6  | 46.0  | 2.9                                                             | 2.4   | 1.9   |
|                 |              |                      | Complex with TF (Tig) | 77.5                                                | 65.5  | 50.6  | 3.7                                                             | 3.1   | 2.4   |
| P27859          | TatD         | Cytoplasm            | Monomer               | 113.7                                               | 96.0  | 74.2  | 9.5                                                             | 8.0   | 6.2   |
|                 |              |                      | Monomer               | 198.1                                               | 167.4 | 129.3 | 30.9                                                            | 26.1  | 20.2  |
| P0A843          | TatE         | Cell inner membrane  | Complex with SecB     | 77.8                                                | 63.6  | 50.8  | 3.8                                                             | 3.1   | 2.5   |
|                 |              |                      | Complex with TF (Tig) | 88.3                                                | 74.6  | 57.6  | 5.2                                                             | 4.4   | 3.4   |
|                 |              |                      | Monomer               | 106.5                                               | 89.9  | 69.5  | 8.1                                                             | 6.9   | 5.3   |
| Q47537          | TauA         | Periplasm            | Complex with SecB     | 69.1                                                | 56.4  | 45.1  | 2.8                                                             | 2.2   | 1.8   |
|                 |              |                      | Complex with TF (Tig) | 75.5                                                | 63.7  | 49.2  | 3.5                                                             | 2.9   | 2.3   |
|                 |              |                      | Monomer               | 114.7                                               | 96.9  | 74.9  | 9.7                                                             | 8.2   | 6.3   |
| Q47538          | TauB         | Cell inner membrane  | Complex with SecB     | 70.7                                                | 57.7  | 46.1  | 2.9                                                             | 2.4   | 1.9   |
|                 |              |                      | Complex with TF (Tig) | 77.7                                                | 65.6  | 50.7  | 3.7                                                             | 3.2   | 2.4   |
|                 |              |                      | Monomer               | 112.4                                               | 95.0  | 73.4  | 9.2                                                             | 7.8   | 6.0   |
| Q47539          | TauC         | Cell inner membrane  | Complex with SecB     | 70.3                                                | 57.4  | 45.8  | 2.9                                                             | 2.4   | 1.9   |
|                 |              |                      | Complex with TF (Tig) | 77.1                                                | 65.1  | 50.3  | 3.7                                                             | 3.1   | 2.4   |
|                 |              |                      | Monomer               | 108.8                                               | 91.9  | 71.0  | 8.6                                                             | 7.2   | 5.6   |
| P37610          | TauD         |                      | Homodimer             | 82.9                                                | 67.7  | 54.1  | 4.4                                                             | 3.6   | 2.9   |
| P0ACQ7          | TdcA         |                      | Monomer               | 106.1                                               | 89.7  | 69.3  | 8.1                                                             | 6.8   | 5.3   |
|                 |              |                      | Monomer               | 105.3                                               | 89.0  | 68.7  | 7.9                                                             | 6.7   | 5.2   |
| P0AGF6          | TdcB         |                      | Homotetramer          | 61.2                                                | 50.0  | 39.9  | 2.0                                                             | 1.6   | 1.3   |

| UniProtKB A. N. | Protein name | Subcellular location | Subunit               | $D_0 \left( \frac{\mu\text{m}^2}{\text{s}} \right)$ |       |       | $D_{\text{cyto}} \left( \frac{\mu\text{m}^2}{\text{s}} \right)$ |       |       |
|-----------------|--------------|----------------------|-----------------------|-----------------------------------------------------|-------|-------|-----------------------------------------------------------------|-------|-------|
|                 |              |                      |                       | 310 K                                               | 303 K | 293 K | 310 K                                                           | 303 K | 293 K |
| P0AAD8          | TdcC         | Cell inner membrane  | Monomer               | 92.6                                                | 78.2  | 60.4  | 5.8                                                             | 4.9   | 3.8   |
|                 |              |                      | Complex with SecB     | 65.6                                                | 53.6  | 42.8  | 2.4                                                             | 2.0   | 1.6   |
|                 |              |                      | Complex with TF (Tig) | 70.8                                                | 59.8  | 46.2  | 2.9                                                             | 2.5   | 1.9   |
| P11868          | TdcD         | Cytoplasm            | Monomer               | 97.1                                                | 82.0  | 63.3  | 6.5                                                             | 5.5   | 4.3   |
| P42632          | TdcE         |                      | Monomer               | 74.2                                                | 62.7  | 48.4  | 3.3                                                             | 2.8   | 2.2   |
| P0AGL2          | TdcF         |                      | Monomer               | 151.2                                               | 127.7 | 98.6  | 17.8                                                            | 15.0  | 11.6  |
| P42630          | TdcG         |                      | Monomer               | 92.9                                                | 78.5  | 60.6  | 5.9                                                             | 5.0   | 3.8   |
| P11866          | TdcR         |                      | Monomer               | 183.0                                               | 154.6 | 119.4 | 26.3                                                            | 22.3  | 17.2  |
| P07913          | Tdh          |                      | Cytoplasm             | Monomer                                             | 103.0 | 87.0  | 67.2                                                            | 7.5   | 6.4   |
|                 |              | Homotetramer         |                       | 59.8                                                | 48.9  | 39.0  | 1.9                                                             | 1.5   | 1.2   |
| P23331          | Tdk          | Cytoplasm            | Monomer               | 123.5                                               | 104.3 | 80.6  | 11.4                                                            | 9.7   | 7.5   |
|                 |              |                      | Homotetramer          | 71.7                                                | 58.6  | 46.8  | 3.0                                                             | 2.5   | 2.0   |
| P25396          | TehA         | Cell inner membrane  | Monomer               | 104.5                                               | 88.3  | 68.2  | 7.8                                                             | 6.6   | 5.1   |
|                 |              |                      | Complex with SecB     | 68.6                                                | 56.1  | 44.8  | 2.7                                                             | 2.2   | 1.8   |
|                 |              |                      | Complex with TF (Tig) | 74.9                                                | 63.2  | 48.9  | 3.4                                                             | 2.9   | 2.2   |
| P25397          | TehB         | Cytoplasm            | Monomer               | 125.5                                               | 106.0 | 81.9  | 11.8                                                            | 10.0  | 7.7   |
|                 |              |                      | Homodimer             | 95.6                                                | 78.1  | 62.4  | 6.3                                                             | 5.1   | 4.1   |
| P0ADA1          | TesA         | Periplasm            | Monomer               | 123.2                                               | 104.1 | 80.4  | 11.4                                                            | 9.6   | 7.4   |
|                 |              |                      | Complex with SecB     | 72.1                                                | 58.9  | 47.0  | 3.1                                                             | 2.5   | 2.0   |
|                 |              |                      | Complex with TF (Tig) | 79.7                                                | 67.3  | 52.0  | 4.0                                                             | 3.4   | 2.6   |
| P0AGG2          | TesB         |                      | Monomer               | 109.4                                               | 92.4  | 71.4  | 8.7                                                             | 7.3   | 5.7   |
|                 |              |                      | Homotetramer          | 63.5                                                | 51.9  | 41.5  | 2.2                                                             | 1.8   | 1.4   |
| P77712          | TesC         |                      | Monomer               | 146.8                                               | 124.0 | 95.8  | 16.7                                                            | 14.1  | 10.9  |
|                 |              |                      | Homotetramer          | 85.3                                                | 69.7  | 55.6  | 4.7                                                             | 3.9   | 3.1   |
| P77699          | TfaD         |                      | Monomer               | 114.8                                               | 96.9  | 74.9  | 9.7                                                             | 8.2   | 6.3   |
| P09153          | TfaE         |                      | Monomer               | 127.4                                               | 107.6 | 83.1  | 12.3                                                            | 10.3  | 8.0   |
| P76155          | TfaQ         |                      | Monomer               | 128.2                                               | 108.3 | 83.6  | 12.4                                                            | 10.5  | 8.1   |
| P77163          | TfaR         |                      | Monomer               | 128.2                                               | 108.3 | 83.6  | 12.4                                                            | 10.5  | 8.1   |
| P77326          | TfaS         |                      | Monomer               | 157.3                                               | 132.9 | 102.6 | 19.3                                                            | 16.3  | 12.6  |
| P0A847          | Tgt          |                      | Monomer               | 97.8                                                | 82.6  | 63.8  | 6.6                                                             | 5.6   | 4.3   |
|                 |              |                      | Homodimer             | 74.5                                                | 60.9  | 48.6  | 3.4                                                             | 2.7   | 2.2   |

| UniProtKB A. N. | Protein name | Subcellular location | Subunit                 | $D_0 \left( \frac{\mu\text{m}^2}{\text{s}} \right)$ |       |       | $D_{\text{cyto}} \left( \frac{\mu\text{m}^2}{\text{s}} \right)$ |       |       |
|-----------------|--------------|----------------------|-------------------------|-----------------------------------------------------|-------|-------|-----------------------------------------------------------------|-------|-------|
|                 |              |                      |                         | 310 K                                               | 303 K | 293 K | 310 K                                                           | 303 K | 293 K |
|                 |              |                      | Homotrimer              | 63.5                                                | 53.7  | 41.5  | 2.2                                                             | 1.9   | 1.4   |
| P31550          | ThiB         | Periplasm            | Monomer                 | 104.2                                               | 88.1  | 68.0  | 7.7                                                             | 6.5   | 5.0   |
|                 |              |                      | Complex with SecB       | 68.6                                                | 56.0  | 44.7  | 2.7                                                             | 2.2   | 1.8   |
|                 |              |                      | Complex with TF (Tig)   | 74.8                                                | 63.2  | 48.8  | 3.4                                                             | 2.9   | 2.2   |
|                 |              |                      |                         |                                                     |       |       |                                                                 |       |       |
| P30136          | ThiC         |                      | Monomer                 | 80.1                                                | 67.6  | 52.3  | 4.0                                                             | 3.4   | 2.6   |
|                 |              |                      | Homodimer               | 61.0                                                | 49.9  | 39.8  | 2.0                                                             | 1.6   | 1.3   |
| P76422          | ThiD         |                      | Monomer                 | 114.2                                               | 96.5  | 74.5  | 9.6                                                             | 8.1   | 6.2   |
| P30137          | ThiE         |                      | Monomer                 | 124.4                                               | 105.1 | 81.2  | 11.6                                                            | 9.8   | 7.6   |
| P30138          | ThiF         |                      | Monomer                 | 116.9                                               | 98.8  | 76.3  | 10.1                                                            | 8.5   | 6.6   |
|                 |              |                      | Homodimer               | 89.1                                                | 72.8  | 58.1  | 5.3                                                             | 4.3   | 3.5   |
| P30139          | ThiG         | Cytoplasm            | Monomer                 | 117.1                                               | 98.9  | 76.4  | 10.1                                                            | 8.5   | 6.6   |
|                 |              |                      | Homotetramer            | 68.0                                                | 55.5  | 44.4  | 2.6                                                             | 2.2   | 1.7   |
|                 |              |                      | Heterodimer (ThiG–ThiH) | 80.4                                                | 67.9  | 52.4  | 4.1                                                             | 3.5   | 2.7   |
| P30140          | ThiH         |                      | Monomer                 | 97.1                                                | 82.0  | 63.4  | 6.5                                                             | 5.5   | 4.3   |
|                 |              |                      | Heterodimer (ThiG–ThiH) | 80.4                                                | 67.9  | 52.4  | 4.1                                                             | 3.5   | 2.7   |
| P77718          | ThiI         | Cytoplasm            | Monomer                 | 88.4                                                | 74.7  | 57.7  | 5.2                                                             | 4.4   | 3.4   |
| P75948          | ThiK         |                      | Monomer                 | 108.8                                               | 91.9  | 71.0  | 8.6                                                             | 7.2   | 5.6   |
| P0AGG0          | ThiL         |                      | Monomer                 | 105.5                                               | 89.1  | 68.8  | 8.0                                                             | 6.7   | 5.2   |
| P76423          | ThiM         |                      | Monomer                 | 116.3                                               | 98.3  | 75.9  | 10.0                                                            | 8.4   | 6.5   |
| P31549          | ThiP         | Cell inner membrane  | Monomer                 | 85.7                                                | 72.4  | 55.9  | 4.8                                                             | 4.1   | 3.1   |
|                 |              |                      | Complex with SecB       | 63.4                                                | 51.8  | 41.4  | 2.2                                                             | 1.8   | 1.4   |
|                 |              |                      | Complex with TF (Tig)   | 67.9                                                | 57.4  | 44.3  | 2.6                                                             | 2.2   | 1.7   |
| P31548          | ThiQ         | Cell inner membrane  | Monomer                 | 120.5                                               | 101.8 | 78.6  | 10.8                                                            | 9.1   | 7.0   |
|                 |              |                      | Complex with SecB       | 71.6                                                | 58.5  | 46.8  | 3.0                                                             | 2.5   | 2.0   |
|                 |              |                      | Complex with TF (Tig)   | 79.1                                                | 66.8  | 51.6  | 3.9                                                             | 3.3   | 2.6   |
| O32583          | ThiS         |                      | Monomer                 | 195.1                                               | 164.8 | 127.3 | 29.9                                                            | 25.3  | 19.5  |
| P00561          | ThrA         |                      | Monomer                 | 73.2                                                | 61.8  | 47.8  | 3.2                                                             | 2.7   | 2.1   |
|                 |              |                      | Homotetramer            | 42.5                                                | 34.7  | 27.7  | 0.7                                                             | 0.6   | 0.4   |
| P00547          | ThrB         | Cytoplasm            | Monomer                 | 107.2                                               | 90.6  | 70.0  | 8.3                                                             | 7.0   | 5.4   |
| P00934          | ThrC         |                      | Monomer                 | 94.0                                                | 79.4  | 61.3  | 6.0                                                             | 5.1   | 3.9   |
| P0AD86          | ThrL         |                      | Monomer                 | 315.8                                               | 266.8 | 206.1 | 73.7                                                            | 62.3  | 48.1  |

| UniProtKB A. N. | Protein name | Subcellular location | Subunit               | $D_0 \left( \frac{\mu\text{m}^2}{\text{s}} \right)$ |       |       | $D_{\text{cyto}} \left( \frac{\mu\text{m}^2}{\text{s}} \right)$ |       |       |
|-----------------|--------------|----------------------|-----------------------|-----------------------------------------------------|-------|-------|-----------------------------------------------------------------|-------|-------|
|                 |              |                      |                       | 310 K                                               | 303 K | 293 K | 310 K                                                           | 303 K | 293 K |
| P0A8M3          | ThrS         | Cytoplasm            | Monomer               | 78.7                                                | 66.5  | 51.4  | 3.9                                                             | 3.3   | 2.5   |
|                 |              |                      | Homodimer             | 60.0                                                | 49.0  | 39.1  | 1.9                                                             | 1.5   | 1.2   |
| P0A884          | ThyA         | Cytoplasm            | Monomer               | 111.5                                               | 94.2  | 72.7  | 9.0                                                             | 7.6   | 5.9   |
|                 |              |                      | Homodimer             | 84.9                                                | 69.4  | 55.4  | 4.7                                                             | 3.8   | 3.1   |
| P0A850          | Tig          |                      | Monomer               | 93.1                                                | 78.7  | 60.8  | 5.9                                                             | 5.0   | 3.9   |
|                 |              |                      | Homodimer             | 71.0                                                | 58.0  | 46.3  | 3.0                                                             | 2.4   | 1.9   |
| P52097          | TilS         | Cytoplasm            | Monomer               | 93.1                                                | 78.7  | 60.8  | 5.9                                                             | 5.0   | 3.9   |
| A5A627          | TisB         | Cell inner membrane  | Monomer               | 268.9                                               | 227.2 | 175.5 | 55.2                                                            | 46.6  | 36.0  |
|                 |              |                      | Complex with SecB     | 79.4                                                | 64.9  | 51.8  | 4.0                                                             | 3.2   | 2.6   |
|                 |              |                      | Complex with TF (Tig) | 90.8                                                | 76.7  | 59.3  | 5.5                                                             | 4.7   | 3.6   |
| P27302          | TktA         |                      | Monomer               | 79.5                                                | 67.1  | 51.9  | 4.0                                                             | 3.4   | 2.6   |
| P33570          | TktB         |                      | Monomer               | 79.1                                                | 66.8  | 51.6  | 3.9                                                             | 3.3   | 2.6   |
| P0AGG8          | TldD         |                      | Monomer               | 90.8                                                | 76.7  | 59.3  | 5.6                                                             | 4.7   | 3.6   |
| P76562          | TmcA         | Cytoplasm            | Monomer               | 78.4                                                | 66.2  | 51.1  | 3.8                                                             | 3.2   | 2.5   |
| P0A720          | Tmk          |                      | Monomer               | 122.8                                               | 103.8 | 80.2  | 11.3                                                            | 9.5   | 7.4   |
|                 |              |                      | Homodimer             | 93.6                                                | 76.5  | 61.1  | 6.0                                                             | 4.9   | 3.9   |
| P0A853          | TnaA         |                      | Monomer               | 89.9                                                | 75.9  | 58.6  | 5.4                                                             | 4.6   | 3.5   |
|                 |              |                      | Homotetramer          | 52.2                                                | 42.6  | 34.1  | 1.3                                                             | 1.0   | 0.8   |
| P23173          | TnaB         | Cell inner membrane  | Monomer               | 95.5                                                | 80.7  | 62.3  | 6.3                                                             | 5.3   | 4.1   |
|                 |              |                      | Complex with SecB     | 66.4                                                | 54.2  | 43.3  | 2.5                                                             | 2.0   | 1.6   |
|                 |              |                      | Complex with TF (Tig) | 71.9                                                | 60.7  | 46.9  | 3.1                                                             | 2.6   | 2.0   |
| P0AD89          | TnaL         |                      | Monomer               | 280.5                                               | 237.0 | 183.0 | 59.6                                                            | 50.4  | 38.9  |
| P19934          | TolA         | Cell inner membrane  | Monomer               | 97.3                                                | 82.2  | 63.5  | 6.6                                                             | 5.5   | 4.3   |
|                 |              |                      | Complex with SecB     | 66.9                                                | 54.6  | 43.6  | 2.5                                                             | 2.1   | 1.6   |
|                 |              |                      | Complex with TF (Tig) | 72.5                                                | 61.2  | 47.3  | 3.1                                                             | 2.6   | 2.0   |
| P0A855          | TolB         | Periplasm            | Monomer               | 94.9                                                | 80.2  | 61.9  | 6.2                                                             | 5.2   | 4.0   |
|                 |              |                      | Complex with SecB     | 66.2                                                | 54.1  | 43.2  | 2.5                                                             | 2.0   | 1.6   |
|                 |              |                      | Complex with TF (Tig) | 71.6                                                | 60.5  | 46.7  | 3.0                                                             | 2.6   | 2.0   |
| P02930          | TolC         | Cell outer membrane  | Monomer               | 89.2                                                | 75.4  | 58.2  | 5.3                                                             | 4.5   | 3.5   |
|                 |              |                      | Complex with SecB     | 64.5                                                | 52.7  | 42.1  | 2.3                                                             | 1.9   | 1.5   |
|                 |              |                      | Complex with TF (Tig) | 69.4                                                | 58.7  | 45.3  | 2.8                                                             | 2.4   | 1.8   |



| UniProtKB A. N. | Protein name | Subcellular location | Subunit               | $D_0 \left( \frac{\mu\text{m}^2}{\text{s}} \right)$ |       |       | $D_{\text{cyto}} \left( \frac{\mu\text{m}^2}{\text{s}} \right)$ |       |       |
|-----------------|--------------|----------------------|-----------------------|-----------------------------------------------------|-------|-------|-----------------------------------------------------------------|-------|-------|
|                 |              |                      |                       | 310 K                                               | 303 K | 293 K | 310 K                                                           | 303 K | 293 K |
| P0ABU9          | TolQ         | Cell inner membrane  | Monomer               | 119.3                                               | 100.8 | 77.9  | 10.6                                                            | 8.9   | 6.9   |
|                 |              |                      | Complex with SecB     | 71.5                                                | 58.4  | 46.6  | 3.0                                                             | 2.5   | 2.0   |
|                 |              |                      | Complex with TF (Tig) | 78.8                                                | 66.6  | 51.4  | 3.9                                                             | 3.3   | 2.5   |
| P0ABV6          | TolR         | Cell inner membrane  | Monomer               | 145.7                                               | 123.1 | 95.1  | 16.4                                                            | 13.9  | 10.7  |
|                 |              |                      | Complex with SecB     | 74.7                                                | 61.1  | 48.8  | 3.4                                                             | 2.8   | 2.2   |
|                 |              |                      | Complex with TF (Tig) | 83.5                                                | 70.6  | 54.5  | 4.5                                                             | 3.8   | 2.9   |
| P0AAR0          | TomB         | Cytoplasm            | Monomer               | 148.9                                               | 125.8 | 97.2  | 17.2                                                            | 14.5  | 11.2  |
| P02929          | TonB         | Cell inner membrane  | Monomer               | 118.5                                               | 100.1 | 77.3  | 10.4                                                            | 8.8   | 6.8   |
|                 |              |                      | Complex with SecB     | 71.3                                                | 58.3  | 46.5  | 3.0                                                             | 2.4   | 2.0   |
|                 |              |                      | Complex with TF (Tig) | 78.6                                                | 66.4  | 51.3  | 3.9                                                             | 3.3   | 2.5   |
| P06612          | TopA         |                      | Monomer               | 70.7                                                | 59.7  | 46.1  | 2.9                                                             | 2.5   | 1.9   |
| P14294          | TopB         |                      | Monomer               | 79.1                                                | 66.8  | 51.6  | 3.9                                                             | 3.3   | 2.6   |
| P33225          | TorA         | Periplasm            | Monomer               | 71.5                                                | 60.4  | 46.7  | 3.0                                                             | 2.6   | 2.0   |
|                 |              |                      | Complex with SecB     | 57.7                                                | 47.1  | 37.6  | 1.7                                                             | 1.4   | 1.1   |
|                 |              |                      | Complex with TF (Tig) | 60.9                                                | 51.4  | 39.7  | 2.0                                                             | 1.6   | 1.3   |
| P33226          | TorC         | Cell inner membrane  | Monomer               | 96.9                                                | 81.8  | 63.2  | 6.5                                                             | 5.5   | 4.2   |
|                 |              |                      | Complex with SecB     | 66.8                                                | 54.5  | 43.6  | 2.5                                                             | 2.1   | 1.6   |
|                 |              |                      | Complex with TF (Tig) | 72.3                                                | 61.1  | 47.2  | 3.1                                                             | 2.6   | 2.0   |
| P36662          | TorD         | Cytoplasm            | Monomer               | 125.4                                               | 105.9 | 81.8  | 11.8                                                            | 10.0  | 7.7   |
| Q2EES9          | TorI         |                      | Monomer               | 191.3                                               | 161.7 | 124.9 | 28.8                                                            | 24.4  | 18.8  |
| P38684          | TorR         | Cytoplasm            | Monomer               | 118.2                                               | 99.9  | 77.1  | 10.3                                                            | 8.7   | 6.8   |
| P39453          | TorS         | Cell inner membrane  | Monomer               | 69.7                                                | 58.9  | 45.5  | 2.8                                                             | 2.4   | 1.8   |
|                 |              |                      | Complex with SecB     | 56.8                                                | 46.4  | 37.1  | 1.6                                                             | 1.3   | 1.0   |
|                 |              |                      | Complex with TF (Tig) | 59.8                                                | 50.5  | 39.0  | 1.9                                                             | 1.6   | 1.2   |
| P38683          | TorT         | Periplasm            | Monomer               | 102.4                                               | 86.5  | 66.8  | 7.4                                                             | 6.3   | 4.8   |
|                 |              |                      | Complex with SecB     | 68.1                                                | 55.7  | 44.5  | 2.7                                                             | 2.2   | 1.7   |
|                 |              |                      | Complex with TF (Tig) | 74.2                                                | 62.7  | 48.4  | 3.3                                                             | 2.8   | 2.2   |
| P52005          | TorY         | Cell inner membrane  | Monomer               | 99.9                                                | 84.4  | 65.2  | 7.0                                                             | 5.9   | 4.6   |
|                 |              |                      | Complex with SecB     | 67.5                                                | 55.2  | 44.1  | 2.6                                                             | 2.1   | 1.7   |
|                 |              |                      | Complex with TF (Tig) | 73.4                                                | 62.0  | 47.9  | 3.2                                                             | 2.7   | 2.1   |
| P46923          | TorZ         | Periplasm            | Monomer               | 73.2                                                | 61.9  | 47.8  | 3.2                                                             | 2.7   | 2.1   |

| UniProtKB A. N. | Protein name | Subcellular location | Subunit               | $D_0 \left( \frac{\mu\text{m}^2}{\text{s}} \right)$ |       |       | $D_{\text{cyto}} \left( \frac{\mu\text{m}^2}{\text{s}} \right)$ |       |       |
|-----------------|--------------|----------------------|-----------------------|-----------------------------------------------------|-------|-------|-----------------------------------------------------------------|-------|-------|
|                 |              |                      |                       | 310 K                                               | 303 K | 293 K | 310 K                                                           | 303 K | 293 K |
|                 |              |                      | Complex with SecB     | 58.5                                                | 47.8  | 38.2  | 1.7                                                             | 1.4   | 1.1   |
|                 |              |                      | Complex with TF (Tig) | 61.8                                                | 52.2  | 40.3  | 2.0                                                             | 1.7   | 1.3   |
| P0A858          | TpiA         | Cytoplasm            | Monomer               | 116.9                                               | 98.8  | 76.3  | 10.1                                                            | 8.5   | 6.6   |
|                 |              |                      | Homodimer             | 89.1                                                | 72.8  | 58.1  | 5.3                                                             | 4.3   | 3.5   |
| P02338          | Tpr          |                      | Monomer               | 261.9                                               | 221.3 | 170.9 | 52.6                                                            | 44.4  | 34.3  |
|                 |              |                      | Monomer               | 137.5                                               | 116.2 | 89.7  | 14.5                                                            | 12.2  | 9.5   |
| P0A862          | Tpx          | Periplasm            | Complex with SecB     | 73.9                                                | 60.4  | 48.2  | 3.3                                                             | 2.7   | 2.1   |
|                 |              |                      | Complex with TF (Tig) | 82.3                                                | 69.5  | 53.7  | 4.3                                                             | 3.7   | 2.8   |
|                 |              |                      | Monomer               | 102.7                                               | 86.8  | 67.0  | 7.5                                                             | 6.3   | 4.9   |
| P0AFS5          | TqsA         | Cell inner membrane  | Complex with SecB     | 68.2                                                | 55.7  | 44.5  | 2.7                                                             | 2.2   | 1.7   |
|                 |              |                      | Complex with TF (Tig) | 74.3                                                | 62.8  | 48.5  | 3.3                                                             | 2.8   | 2.2   |
|                 |              |                      | Monomer               | 83.5                                                | 70.6  | 54.5  | 4.5                                                             | 3.8   | 2.9   |
| P13482          | TreA         | Periplasm            | Complex with SecB     | 62.6                                                | 51.1  | 40.9  | 2.1                                                             | 1.7   | 1.4   |
|                 |              |                      | Complex with TF (Tig) | 67.0                                                | 56.6  | 43.7  | 2.5                                                             | 2.1   | 1.7   |
|                 |              |                      | Monomer               | 91.0                                                | 76.9  | 59.4  | 5.6                                                             | 4.7   | 3.6   |
| P36672          | TreB         | Cell inner membrane  | Complex with SecB     | 65.1                                                | 53.2  | 42.5  | 2.3                                                             | 1.9   | 1.5   |
|                 |              |                      | Complex with TF (Tig) | 70.2                                                | 59.3  | 45.8  | 2.9                                                             | 2.4   | 1.9   |
| P28904          | TreC         | Cytoplasm            | Monomer               | 83.4                                                | 70.5  | 54.4  | 4.5                                                             | 3.8   | 2.9   |
| P62601          | TreF         | Cytoplasm            | Monomer               | 83.5                                                | 70.5  | 54.5  | 4.5                                                             | 3.8   | 2.9   |
|                 |              |                      | Monomer               | 106.1                                               | 89.7  | 69.3  | 8.1                                                             | 6.8   | 5.3   |
| P36673          | TreR         |                      | Homodimer             | 80.9                                                | 66.1  | 52.8  | 4.2                                                             | 3.4   | 2.7   |
|                 |              |                      | Monomer               | 86.1                                                | 72.7  | 56.2  | 4.9                                                             | 4.1   | 3.2   |
| P05704          | Trg          | Cell inner membrane  | Complex with SecB     | 63.5                                                | 51.9  | 41.4  | 2.2                                                             | 1.8   | 1.4   |
|                 |              |                      | Complex with TF (Tig) | 68.1                                                | 57.5  | 44.4  | 2.7                                                             | 2.2   | 1.7   |
| P0AGI8          | TrkA         | Cell inner membrane  | Monomer               | 91.5                                                | 77.3  | 59.7  | 5.7                                                             | 4.8   | 3.7   |
|                 |              |                      | Monomer               | 89.1                                                | 75.3  | 58.1  | 5.3                                                             | 4.5   | 3.5   |
| P23849          | TrkG         | Cell inner membrane  | Complex with SecB     | 64.5                                                | 52.7  | 42.1  | 2.3                                                             | 1.9   | 1.5   |
|                 |              |                      | Complex with TF (Tig) | 69.4                                                | 58.6  | 45.3  | 2.8                                                             | 2.4   | 1.8   |
|                 |              |                      | Monomer               | 89.8                                                | 75.8  | 58.6  | 5.4                                                             | 4.6   | 3.5   |
| P0AFZ7          | TrkH         | Cell inner membrane  | Complex with SecB     | 64.7                                                | 52.9  | 42.2  | 2.3                                                             | 1.9   | 1.5   |
|                 |              |                      | Complex with TF (Tig) | 69.6                                                | 58.8  | 45.4  | 2.8                                                             | 2.4   | 1.8   |

| UniProtKB A. N. | Protein name | Subcellular location | Subunit   | $D_0 \left( \frac{\mu\text{m}^2}{\text{s}} \right)$ |       |       | $D_{\text{cyto}} \left( \frac{\mu\text{m}^2}{\text{s}} \right)$ |       |       |
|-----------------|--------------|----------------------|-----------|-----------------------------------------------------|-------|-------|-----------------------------------------------------------------|-------|-------|
|                 |              |                      |           | 310 K                                               | 303 K | 293 K | 310 K                                                           | 303 K | 293 K |
| P23003          | TrmA         |                      | Monomer   | 98.3                                                | 83.1  | 64.2  | 6.7                                                             | 5.7   | 4.4   |
| P0A8I5          | TrmB         |                      | Monomer   | 116.4                                               | 98.3  | 75.9  | 10.0                                                            | 8.4   | 6.5   |
| P0A873          | TrmD         | Cytoplasm            | Monomer   | 114.6                                               | 96.8  | 74.8  | 9.6                                                             | 8.1   | 6.3   |
|                 |              |                      | Homodimer | 87.3                                                | 71.3  | 57.0  | 5.0                                                             | 4.1   | 3.3   |
| P0AGJ2          | TrmH         | Cytoplasm            | Monomer   | 119.8                                               | 101.2 | 78.2  | 10.7                                                            | 9.0   | 7.0   |
| P0AE01          | TrmJ         | Cytoplasm            | Monomer   | 116.8                                               | 98.7  | 76.2  | 10.1                                                            | 8.5   | 6.6   |
|                 |              |                      | Homodimer | 89.0                                                | 72.7  | 58.1  | 5.3                                                             | 4.3   | 3.4   |
| P0AGJ7          | TrmL         | Cytoplasm            | Monomer   | 137.8                                               | 116.4 | 89.9  | 14.6                                                            | 12.3  | 9.5   |
|                 |              |                      | Homodimer | 105.0                                               | 85.8  | 68.5  | 7.9                                                             | 6.4   | 5.1   |
| P0A877          | TrpA         |                      | Monomer   | 114.1                                               | 96.4  | 74.4  | 9.5                                                             | 8.1   | 6.2   |
| P0A879          | TrpB         |                      | Monomer   | 97.4                                                | 82.3  | 63.6  | 6.6                                                             | 5.6   | 4.3   |
| P00909          | TrpC         |                      | Monomer   | 92.3                                                | 77.9  | 60.2  | 5.8                                                             | 4.9   | 3.8   |
| P00904          | TrpD         |                      | Monomer   | 87.3                                                | 73.7  | 57.0  | 5.0                                                             | 4.3   | 3.3   |
| P00895          | TrpE         |                      | Monomer   | 86.9                                                | 73.4  | 56.7  | 5.0                                                             | 4.2   | 3.2   |
| P77766          | TrpH         |                      | Monomer   | 108.6                                               | 91.7  | 70.9  | 8.5                                                             | 7.2   | 5.6   |
| P0AD92          | TrpL         |                      | Monomer   | 343.7                                               | 290.4 | 224.3 | 85.4                                                            | 72.2  | 55.7  |
| P0A881          | TrpR         | Cytoplasm            | Monomer   | 158.8                                               | 134.2 | 103.6 | 19.7                                                            | 16.6  | 12.9  |
|                 |              |                      | Homodimer | 121.0                                               | 98.9  | 79.0  | 10.9                                                            | 8.9   | 7.1   |
| P00954          | TrpS         | Cytoplasm            | Monomer   | 102.8                                               | 86.9  | 67.1  | 7.5                                                             | 6.3   | 4.9   |
|                 |              |                      | Homodimer | 78.4                                                | 64.0  | 51.1  | 3.8                                                             | 3.1   | 2.5   |
| P07649          | TruA         |                      | Monomer   | 111.6                                               | 94.3  | 72.8  | 9.1                                                             | 7.7   | 5.9   |
|                 |              |                      | Homodimer | 85.0                                                | 69.5  | 55.5  | 4.7                                                             | 3.9   | 3.1   |
| P60340          | TruB         |                      | Monomer   | 105.5                                               | 89.1  | 68.8  | 8.0                                                             | 6.7   | 5.2   |
| P0AA41          | TruC         |                      | Monomer   | 112.6                                               | 95.2  | 73.5  | 9.3                                                             | 7.8   | 6.0   |
| Q57261          | TruD         |                      | Monomer   | 101.1                                               | 85.4  | 66.0  | 7.2                                                             | 6.1   | 4.7   |
| P0AA25          | TrxA         |                      | Monomer   | 161.6                                               | 136.6 | 105.5 | 20.4                                                            | 17.3  | 13.3  |
| P0A9P4          | TrxB         | Cytoplasm            | Monomer   | 106.0                                               | 89.6  | 69.2  | 8.0                                                             | 6.8   | 5.3   |
|                 |              |                      | Homodimer | 80.8                                                | 66.0  | 52.7  | 4.1                                                             | 3.4   | 2.7   |
| P0AGG4          | TrxC         | Cytoplasm            | Monomer   | 145.1                                               | 122.6 | 94.7  | 16.3                                                            | 13.7  | 10.6  |
| P0A6P1          | Tsf          | Cytoplasm            | Monomer   | 111.5                                               | 94.2  | 72.8  | 9.1                                                             | 7.7   | 5.9   |
|                 |              |                      | Monomer   | 97.2                                                | 82.2  | 63.5  | 6.6                                                             | 5.5   | 4.3   |
| P60778          | TsgA         | Cell inner membrane  |           |                                                     |       |       |                                                                 |       |       |

| UniProtKB A. N. | Protein name | Subcellular location           | Subunit                                                | $D_0 \left( \frac{\mu\text{m}^2}{\text{s}} \right)$ |       |       | $D_{\text{cyto}} \left( \frac{\mu\text{m}^2}{\text{s}} \right)$ |       |       |
|-----------------|--------------|--------------------------------|--------------------------------------------------------|-----------------------------------------------------|-------|-------|-----------------------------------------------------------------|-------|-------|
|                 |              |                                |                                                        | 310 K                                               | 303 K | 293 K | 310 K                                                           | 303 K | 293 K |
|                 |              |                                | Complex with SecB                                      | 66.9                                                | 54.6  | 43.6  | 2.5                                                             | 2.1   | 1.6   |
|                 |              |                                | Complex with TF (Tig)                                  | 72.5                                                | 61.2  | 47.3  | 3.1                                                             | 2.6   | 2.0   |
| P02942          | Tsr          | Cell inner membrane            | Monomer                                                | 85.8                                                | 72.5  | 56.0  | 4.8                                                             | 4.1   | 3.1   |
|                 |              |                                | Complex with SecB                                      | 63.4                                                | 51.8  | 41.4  | 2.2                                                             | 1.8   | 1.4   |
|                 |              |                                | Complex with TF (Tig)                                  | 68.0                                                | 57.4  | 44.4  | 2.6                                                             | 2.2   | 1.7   |
| P0A927          | Tsx          | Cell outer membrane            | Monomer                                                | 107.3                                               | 90.6  | 70.0  | 8.3                                                             | 7.0   | 5.4   |
|                 |              |                                | Complex with SecB                                      | 69.2                                                | 56.6  | 45.2  | 2.8                                                             | 2.3   | 1.8   |
|                 |              |                                | Complex with TF (Tig)                                  | 75.7                                                | 63.9  | 49.4  | 3.5                                                             | 3.0   | 2.3   |
| P76055          | TtcA         | Cytoplasm                      | Monomer                                                | 104.9                                               | 88.6  | 68.5  | 7.9                                                             | 6.6   | 5.1   |
| P05847          | TtdA         |                                | Monomer                                                | 108.4                                               | 91.6  | 70.7  | 8.5                                                             | 7.2   | 5.5   |
|                 |              |                                | Heterotetramer (TtdA <sub>2</sub> -TtdB <sub>2</sub> ) | 67.2                                                | 56.8  | 43.8  | 2.6                                                             | 2.2   | 1.7   |
| P0AC35          | TtdB         |                                | Monomer                                                | 125.1                                               | 105.7 | 81.7  | 11.8                                                            | 9.9   | 7.7   |
|                 |              |                                | Heterotetramer (TtdA <sub>2</sub> -TtdB <sub>2</sub> ) | 67.2                                                | 56.8  | 43.8  | 2.6                                                             | 2.2   | 1.7   |
| P45463          | TtdR         |                                | Monomer                                                | 105.2                                               | 88.9  | 68.7  | 7.9                                                             | 6.7   | 5.2   |
| P39414          | TtdT         | Cell inner membrane            | Monomer                                                | 89.8                                                | 75.9  | 58.6  | 5.4                                                             | 4.6   | 3.5   |
|                 |              |                                | Complex with SecB                                      | 64.7                                                | 52.9  | 42.2  | 2.3                                                             | 1.9   | 1.5   |
|                 |              |                                | Complex with TF (Tig)                                  | 69.7                                                | 58.8  | 45.5  | 2.8                                                             | 2.4   | 1.8   |
| P0CE47          | TufA         | Cytoplasm. Cell inner membrane | Monomer                                                | 97.1                                                | 82.1  | 63.4  | 6.5                                                             | 5.5   | 4.3   |
| P0CE48          | TufB         | Cytoplasm. Cell inner membrane | Monomer                                                | 97.1                                                | 82.0  | 63.4  | 6.5                                                             | 5.5   | 4.3   |
| P16525          | Tus          | Cytoplasm                      | Monomer                                                | 104.7                                               | 88.4  | 68.3  | 7.8                                                             | 6.6   | 5.1   |
| P0A890          | TusA         | Cytoplasm                      | Monomer                                                | 179.1                                               | 151.3 | 116.8 | 25.2                                                            | 21.3  | 16.5  |
| P45530          | TusB         | Cytoplasm                      | Monomer                                                | 167.9                                               | 141.8 | 109.6 | 22.1                                                            | 18.7  | 14.4  |
|                 |              |                                | Heterohexamer, ((TusB-TusC-TusD) <sub>2</sub> )        | 78.4                                                | 66.2  | 51.2  | 3.8                                                             | 3.2   | 2.5   |
| P45531          | TusC         | Cytoplasm                      | Monomer                                                | 155.4                                               | 131.3 | 101.4 | 18.8                                                            | 15.9  | 12.3  |
|                 |              |                                | Heterohexamer, ((TusB-TusC-TusD) <sub>2</sub> )        | 78.4                                                | 66.2  | 51.2  | 3.8                                                             | 3.2   | 2.5   |
| P45532          | TusD         | Cytoplasm                      | Monomer                                                | 152.7                                               | 129.0 | 99.7  | 18.2                                                            | 15.3  | 11.8  |
|                 |              |                                | Heterohexamer, ((TusB-TusC-TusD) <sub>2</sub> )        | 78.4                                                | 66.2  | 51.2  | 3.8                                                             | 3.2   | 2.5   |
| P0AB18          | TusE         | Cytoplasm                      | Monomer                                                | 158.5                                               | 133.9 | 103.4 | 19.6                                                            | 16.6  | 12.8  |
| P46883          | TynA         | Periplasm                      | Monomer                                                | 74.8                                                | 63.2  | 48.8  | 3.4                                                             | 2.9   | 2.2   |

| UniProtKB A. N. | Protein name | Subcellular location | Subunit               | $D_0 \left( \frac{\mu\text{m}^2}{\text{s}} \right)$ |       |       | $D_{\text{cyto}} \left( \frac{\mu\text{m}^2}{\text{s}} \right)$ |       |       |
|-----------------|--------------|----------------------|-----------------------|-----------------------------------------------------|-------|-------|-----------------------------------------------------------------|-------|-------|
|                 |              |                      |                       | 310 K                                               | 303 K | 293 K | 310 K                                                           | 303 K | 293 K |
|                 |              |                      | Complex with SecB     | 59.1                                                | 48.3  | 38.6  | 1.8                                                             | 1.5   | 1.2   |
|                 |              |                      | Complex with TF (Tig) | 62.6                                                | 52.9  | 40.9  | 2.1                                                             | 1.8   | 1.4   |
| P32132          | TypA         |                      | Monomer               | 81.7                                                | 69.0  | 53.3  | 4.3                                                             | 3.6   | 2.8   |
| P07023          | TyrA         | Cytoplasm            | Monomer               | 98.3                                                | 83.0  | 64.1  | 6.7                                                             | 5.7   | 4.4   |
| P04693          | TyrB         | Cytoplasm            | Monomer               | 96.9                                                | 81.9  | 63.2  | 6.5                                                             | 5.5   | 4.2   |
|                 |              |                      | Homodimer             | 73.9                                                | 60.3  | 48.2  | 3.3                                                             | 2.7   | 2.1   |
| P0AAD4          | TyrP         | Cell inner membrane  | Monomer               | 97.6                                                | 82.4  | 63.7  | 6.6                                                             | 5.6   | 4.3   |
|                 |              |                      | Complex with SecB     | 66.9                                                | 54.7  | 43.7  | 2.5                                                             | 2.1   | 1.7   |
|                 |              |                      | Complex with TF (Tig) | 72.6                                                | 61.3  | 47.4  | 3.1                                                             | 2.7   | 2.0   |
| P07604          | TyrR         |                      | Monomer               | 86.8                                                | 73.3  | 56.6  | 5.0                                                             | 4.2   | 3.2   |
|                 |              |                      | Homodimer             | 66.2                                                | 54.0  | 43.2  | 2.5                                                             | 2.0   | 1.6   |
| P0AGJ9          | TyrS         | Cytoplasm            | Monomer               | 93.6                                                | 79.1  | 61.1  | 6.0                                                             | 5.1   | 3.9   |
|                 |              |                      | Homodimer             | 71.4                                                | 58.3  | 46.6  | 3.0                                                             | 2.5   | 2.0   |
| P0AGK1          | UbiA         | Cell inner membrane  | Monomer               | 108.7                                               | 91.8  | 70.9  | 8.5                                                             | 7.2   | 5.6   |
|                 |              |                      | Complex with SecB     | 69.5                                                | 56.8  | 45.4  | 2.8                                                             | 2.3   | 1.8   |
|                 |              |                      | Complex with TF (Tig) | 76.1                                                | 64.3  | 49.7  | 3.6                                                             | 3.0   | 2.3   |
| P0A6A0          | UbiB         | Cell inner membrane  | Monomer               | 83.7                                                | 70.7  | 54.6  | 4.5                                                             | 3.8   | 3.0   |
|                 |              |                      | Complex with SecB     | 62.7                                                | 51.2  | 40.9  | 2.1                                                             | 1.7   | 1.4   |
|                 |              |                      | Complex with TF (Tig) | 67.1                                                | 56.7  | 43.8  | 2.5                                                             | 2.1   | 1.7   |
| P26602          | UbiC         | Cytoplasm            | Monomer               | 134.8                                               | 113.9 | 87.9  | 13.9                                                            | 11.7  | 9.0   |
| P0AAB4          | UbiD         | Cell membrane        | Monomer               | 88.1                                                | 74.4  | 57.5  | 5.1                                                             | 4.3   | 3.4   |
|                 |              |                      | Complex with SecB     | 64.2                                                | 52.4  | 41.9  | 2.3                                                             | 1.8   | 1.5   |
|                 |              |                      | Complex with TF (Tig) | 68.9                                                | 58.2  | 45.0  | 2.7                                                             | 2.3   | 1.8   |
| P0A887          | UbiE         |                      | Monomer               | 115.1                                               | 97.2  | 75.1  | 9.7                                                             | 8.2   | 6.4   |
| P75728          | UbiF         |                      | Monomer               | 97.4                                                | 82.3  | 63.6  | 6.6                                                             | 5.6   | 4.3   |
| P17993          | UbiG         |                      | Monomer               | 117.6                                               | 99.4  | 76.8  | 10.2                                                            | 8.6   | 6.7   |
|                 |              |                      | Homodimer             | 89.7                                                | 73.2  | 58.5  | 5.4                                                             | 4.4   | 3.5   |
| P25534          | UbiH         |                      | Monomer               | 98.0                                                | 82.8  | 64.0  | 6.7                                                             | 5.6   | 4.4   |
| P0AG03          | UbiX         |                      | Monomer               | 129.7                                               | 109.6 | 84.7  | 12.7                                                            | 10.8  | 8.3   |
| P37440          | UcpA         |                      | Monomer               | 115.5                                               | 97.5  | 75.3  | 9.8                                                             | 8.3   | 6.4   |
| P0A8F4          | Udk          | Cytoplasm            | Monomer               | 121.7                                               | 102.8 | 79.4  | 11.1                                                            | 9.3   | 7.2   |

| UniProtKB A. N. | Protein name | Subcellular location | Subunit               | $D_0 \left( \frac{\mu\text{m}^2}{\text{s}} \right)$ |       |       | $D_{\text{cyto}} \left( \frac{\mu\text{m}^2}{\text{s}} \right)$ |       |       |
|-----------------|--------------|----------------------|-----------------------|-----------------------------------------------------|-------|-------|-----------------------------------------------------------------|-------|-------|
|                 |              |                      |                       | 310 K                                               | 303 K | 293 K | 310 K                                                           | 303 K | 293 K |
|                 |              |                      | Homotetramer          | 70.7                                                | 57.7  | 46.1  | 2.9                                                             | 2.4   | 1.9   |
| P12758          | Udp          | Cytoplasm            | Monomer               | 116.6                                               | 98.5  | 76.1  | 10.0                                                            | 8.5   | 6.5   |
|                 |              |                      | Homoheptamer          | 57.8                                                | 47.2  | 37.7  | 1.7                                                             | 1.4   | 1.1   |
|                 |              |                      |                       |                                                     |       |       |                                                                 |       |       |
| P76373          | Ugd          |                      | Monomer               | 96.8                                                | 81.8  | 63.2  | 6.5                                                             | 5.5   | 4.2   |
| P10905          | UgpA         | Cell inner membrane  | Monomer               | 107.7                                               | 91.0  | 70.3  | 8.4                                                             | 7.1   | 5.4   |
|                 |              |                      | Complex with SecB     | 69.3                                                | 56.6  | 45.2  | 2.8                                                             | 2.3   | 1.8   |
|                 |              |                      | Complex with TF (Tig) | 75.8                                                | 64.0  | 49.5  | 3.5                                                             | 3.0   | 2.3   |
| P0AG80          | UgpB         | Periplasm            | Monomer               | 92.9                                                | 78.5  | 60.6  | 5.9                                                             | 5.0   | 3.8   |
|                 |              |                      | Complex with SecB     | 65.7                                                | 53.6  | 42.8  | 2.4                                                             | 2.0   | 1.6   |
|                 |              |                      | Complex with TF (Tig) | 70.9                                                | 59.9  | 46.3  | 3.0                                                             | 2.5   | 1.9   |
| P10907          | UgpC         | Cell inner membrane  | Monomer               | 100.7                                               | 85.0  | 65.7  | 7.1                                                             | 6.0   | 4.6   |
|                 |              |                      | Complex with SecB     | 67.7                                                | 55.3  | 44.2  | 2.6                                                             | 2.1   | 1.7   |
|                 |              |                      | Complex with TF (Tig) | 73.6                                                | 62.2  | 48.1  | 3.3                                                             | 2.8   | 2.1   |
| P10906          | UgpE         | Cell inner membrane  | Monomer               | 110.0                                               | 93.0  | 71.8  | 8.8                                                             | 7.4   | 5.7   |
|                 |              |                      | Complex with SecB     | 69.8                                                | 57.0  | 45.5  | 2.8                                                             | 2.3   | 1.8   |
|                 |              |                      | Complex with TF (Tig) | 76.5                                                | 64.6  | 49.9  | 3.6                                                             | 3.0   | 2.3   |
| P10908          | UgpQ         | Cytoplasm            | Monomer               | 116.2                                               | 98.2  | 75.8  | 9.9                                                             | 8.4   | 6.5   |
| P0AGA6          | UhpA         | Cytoplasm            | Monomer               | 129.2                                               | 109.2 | 84.3  | 12.6                                                            | 10.7  | 8.3   |
| P09835          | UhpB         | Cell inner membrane  | Monomer               | 87.6                                                | 74.0  | 57.2  | 5.1                                                             | 4.3   | 3.3   |
|                 |              |                      | Complex with SecB     | 64.0                                                | 52.3  | 41.8  | 2.2                                                             | 1.8   | 1.5   |
|                 |              |                      | Complex with TF (Tig) | 68.8                                                | 58.1  | 44.9  | 2.7                                                             | 2.3   | 1.8   |
| P09836          | UhpC         | Cell inner membrane  | Monomer               | 93.1                                                | 78.6  | 60.7  | 5.9                                                             | 5.0   | 3.8   |
|                 |              |                      | Complex with SecB     | 65.7                                                | 53.7  | 42.9  | 2.4                                                             | 2.0   | 1.6   |
|                 |              |                      | Complex with TF (Tig) | 71.0                                                | 59.9  | 46.3  | 3.0                                                             | 2.5   | 1.9   |
| P0AGC0          | UhpT         | Cell inner membrane  | Monomer               | 91.4                                                | 77.2  | 59.6  | 5.6                                                             | 4.8   | 3.7   |
|                 |              |                      | Complex with SecB     | 65.2                                                | 53.3  | 42.5  | 2.4                                                             | 1.9   | 1.5   |
|                 |              |                      | Complex with TF (Tig) | 70.3                                                | 59.4  | 45.9  | 2.9                                                             | 2.4   | 1.9   |
| P05804          | UidA         |                      | Monomer               | 81.2                                                | 68.6  | 53.0  | 4.2                                                             | 3.5   | 2.7   |
|                 |              |                      | Homotetramer          | 47.1                                                | 38.5  | 30.8  | 0.9                                                             | 0.8   | 0.6   |
| P0CE44          | UidB         | Cell inner membrane  | Monomer               | 91.9                                                | 77.6  | 59.9  | 5.7                                                             | 4.8   | 3.7   |
|                 |              |                      | Complex with SecB     | 65.3                                                | 53.4  | 42.6  | 2.4                                                             | 1.9   | 1.5   |

| UniProtKB A. N. | Protein name | Subcellular location | Subunit               | $D_0 \left( \frac{\mu\text{m}^2}{\text{s}} \right)$ |       |       | $D_{\text{cyto}} \left( \frac{\mu\text{m}^2}{\text{s}} \right)$ |       |       |
|-----------------|--------------|----------------------|-----------------------|-----------------------------------------------------|-------|-------|-----------------------------------------------------------------|-------|-------|
|                 |              |                      |                       | 310 K                                               | 303 K | 293 K | 310 K                                                           | 303 K | 293 K |
|                 |              |                      | Complex with TF (Tig) | 70.5                                                | 59.5  | 46.0  | 2.9                                                             | 2.5   | 1.9   |
| Q47706          | UidC         | Cell outer membrane  | Monomer               | 94.3                                                | 79.7  | 61.6  | 6.1                                                             | 5.1   | 4.0   |
|                 |              |                      | Complex with SecB     | 66.1                                                | 54.0  | 43.1  | 2.4                                                             | 2.0   | 1.6   |
|                 |              |                      | Complex with TF (Tig) | 71.4                                                | 60.3  | 46.6  | 3.0                                                             | 2.5   | 2.0   |
| P0ACT6          | UidR         |                      | Monomer               | 127.1                                               | 107.4 | 82.9  | 12.2                                                            | 10.3  | 8.0   |
| P39301          | UlaA         | Cell inner membrane  | Monomer               | 91.3                                                | 77.1  | 59.6  | 5.6                                                             | 4.7   | 3.7   |
|                 |              |                      | Complex with SecB     | 65.2                                                | 53.2  | 42.5  | 2.4                                                             | 1.9   | 1.5   |
|                 |              |                      | Complex with TF (Tig) | 70.3                                                | 59.4  | 45.8  | 2.9                                                             | 2.4   | 1.9   |
| P69822          | UlaB         | Cytoplasm            | Monomer               | 166.8                                               | 140.9 | 108.9 | 21.8                                                            | 18.4  | 14.2  |
| P69820          | UlaC         | Cytoplasm            | Monomer               | 139.4                                               | 117.7 | 90.9  | 14.9                                                            | 12.6  | 9.7   |
| P39304          | UlaD         |                      | Monomer               | 123.3                                               | 104.1 | 80.4  | 11.4                                                            | 9.6   | 7.4   |
|                 |              |                      | Homodimer             | 93.9                                                | 76.7  | 61.3  | 6.0                                                             | 4.9   | 3.9   |
| P39305          | UlaE         |                      | Monomer               | 109.3                                               | 92.4  | 71.3  | 8.6                                                             | 7.3   | 5.6   |
| P39306          | UlaF         |                      | Monomer               | 119.9                                               | 101.3 | 78.3  | 10.7                                                            | 9.0   | 7.0   |
| P39300          | UlaG         | Cytoplasm            | Monomer               | 100.1                                               | 84.6  | 65.3  | 7.0                                                             | 5.9   | 4.6   |
| P0A9W0          | UlaR         | Cytoplasm            | Monomer               | 115.9                                               | 97.9  | 75.6  | 9.9                                                             | 8.4   | 6.5   |
| P04152          | UmuC         |                      | Monomer               | 93.5                                                | 79.0  | 61.0  | 6.0                                                             | 5.0   | 3.9   |
| P0AG11          | UmuD         |                      | Monomer               | 146.9                                               | 124.1 | 95.9  | 16.7                                                            | 14.1  | 10.9  |
| P12295          | Ung          | Cytoplasm            | Monomer               | 119.2                                               | 100.7 | 77.8  | 10.5                                                            | 8.9   | 6.9   |
| A8DYP9          | Uof          |                      | Monomer               | 272.7                                               | 230.4 | 178.0 | 56.6                                                            | 47.8  | 37.0  |
| P0A8F0          | Upp          |                      | Monomer               | 125.5                                               | 106.0 | 81.9  | 11.8                                                            | 10.0  | 7.7   |
|                 |              |                      | Homodimer             | 95.6                                                | 78.1  | 62.4  | 6.3                                                             | 5.1   | 4.1   |
|                 |              |                      | Homotrimer            | 81.6                                                | 68.9  | 53.2  | 4.2                                                             | 3.6   | 2.8   |
| P60932          | UppP         | Cell inner membrane  | Monomer               | 112.5                                               | 95.0  | 73.4  | 9.2                                                             | 7.8   | 6.0   |
|                 |              |                      | Complex with SecB     | 70.3                                                | 57.4  | 45.9  | 2.9                                                             | 2.4   | 1.9   |
|                 |              |                      | Complex with TF (Tig) | 77.1                                                | 65.2  | 50.3  | 3.7                                                             | 3.1   | 2.4   |
| P60472          | UppS         |                      | Monomer               | 114.5                                               | 96.7  | 74.7  | 9.6                                                             | 8.1   | 6.3   |
|                 |              |                      | Homodimer             | 87.3                                                | 71.3  | 56.9  | 5.0                                                             | 4.1   | 3.3   |
| P0AGM7          | UraA         | Cell inner membrane  | Monomer               | 95.6                                                | 80.8  | 62.4  | 6.3                                                             | 5.3   | 4.1   |
|                 |              |                      | Complex with SecB     | 66.4                                                | 54.3  | 43.3  | 2.5                                                             | 2.0   | 1.6   |
|                 |              |                      | Complex with TF (Tig) | 71.9                                                | 60.7  | 46.9  | 3.1                                                             | 2.6   | 2.0   |

| UniProtKB A. N. | Protein name | Subcellular location | Subunit                                                | $D_0 \left( \frac{\mu\text{m}^2}{\text{s}} \right)$ |       |       | $D_{\text{cyto}} \left( \frac{\mu\text{m}^2}{\text{s}} \right)$ |       |       |
|-----------------|--------------|----------------------|--------------------------------------------------------|-----------------------------------------------------|-------|-------|-----------------------------------------------------------------|-------|-------|
|                 |              |                      |                                                        | 310 K                                               | 303 K | 293 K | 310 K                                                           | 303 K | 293 K |
| P08390          | Usg          |                      | Monomer                                                | 104.0                                               | 87.9  | 67.9  | 7.7                                                             | 6.5   | 5.0   |
| P07024          | UshA         | Periplasm            | Monomer                                                | 85.0                                                | 71.8  | 55.5  | 4.7                                                             | 4.0   | 3.1   |
|                 |              |                      | Complex with SecB                                      | 63.1                                                | 51.6  | 41.2  | 2.2                                                             | 1.8   | 1.4   |
|                 |              |                      | Complex with TF (Tig)                                  | 67.6                                                | 57.1  | 44.1  | 2.6                                                             | 2.2   | 1.7   |
| P0AED0          | UspA         | Cytoplasm            | Monomer                                                | 143.3                                               | 121.0 | 93.5  | 15.8                                                            | 13.4  | 10.3  |
|                 |              |                      | Homodimer                                              | 109.2                                               | 89.2  | 71.2  | 8.6                                                             | 7.0   | 5.6   |
| P0A8S5          | UspB         | Cell inner membrane  | Monomer                                                | 155.5                                               | 131.4 | 101.5 | 18.9                                                            | 15.9  | 12.3  |
|                 |              |                      | Complex with SecB                                      | 75.6                                                | 61.7  | 49.3  | 3.5                                                             | 2.8   | 2.3   |
|                 |              |                      | Complex with TF (Tig)                                  | 84.8                                                | 71.6  | 55.3  | 4.7                                                             | 4.0   | 3.1   |
| P46888          | UspC         | Cytoplasm            | Monomer                                                | 144.8                                               | 122.3 | 94.5  | 16.2                                                            | 13.7  | 10.6  |
| P0AAB8          | UspD         | Cytoplasm            | Monomer                                                | 142.5                                               | 120.4 | 93.0  | 15.6                                                            | 13.2  | 10.2  |
| P0AAC0          | UspE         | Cytoplasm            | Monomer                                                | 104.7                                               | 88.5  | 68.4  | 7.8                                                             | 6.6   | 5.1   |
| P37903          | UspF         |                      | Monomer                                                | 143.4                                               | 121.2 | 93.6  | 15.9                                                            | 13.4  | 10.4  |
|                 |              |                      | Homodimer                                              | 109.3                                               | 89.3  | 71.3  | 8.6                                                             | 7.1   | 5.6   |
| P39177          | UspG         |                      | Monomer                                                | 143.7                                               | 121.4 | 93.8  | 15.9                                                            | 13.5  | 10.4  |
| P43672          | Uup          |                      | Monomer                                                | 79.5                                                | 67.2  | 51.9  | 4.0                                                             | 3.4   | 2.6   |
| P0A698          | UvrA         | Cytoplasm            | Monomer                                                | 68.9                                                | 58.2  | 45.0  | 2.7                                                             | 2.3   | 1.8   |
|                 |              |                      | Heterotetramer (UvrA <sub>2</sub> -UvrB <sub>2</sub> ) | 42.3                                                | 35.8  | 27.6  | 0.7                                                             | 0.6   | 0.4   |
| P0A8F8          | UvrB         | Cytoplasm            | Monomer                                                | 77.8                                                | 65.7  | 50.8  | 3.8                                                             | 3.2   | 2.5   |
|                 |              |                      | Heterotetramer (UvrA <sub>2</sub> -UvrB <sub>2</sub> ) | 42.3                                                | 35.8  | 27.6  | 0.7                                                             | 0.6   | 0.4   |
| P0A8G0          | UvrC         | Cytoplasm            | Monomer                                                | 81.3                                                | 68.7  | 53.0  | 4.2                                                             | 3.6   | 2.7   |
| P03018          | UvrD         |                      | Monomer                                                | 75.6                                                | 63.9  | 49.3  | 3.5                                                             | 3.0   | 2.3   |
| P0AED5          | UvrY         | Cytoplasm            | Monomer                                                | 122.6                                               | 103.6 | 80.0  | 11.2                                                            | 9.5   | 7.3   |
| P42604          | UxaA         |                      | Monomer                                                | 89.0                                                | 75.2  | 58.1  | 5.3                                                             | 4.5   | 3.4   |
| P0A6L7          | UxaB         |                      | Monomer                                                | 88.6                                                | 74.8  | 57.8  | 5.2                                                             | 4.4   | 3.4   |
| P0A8G3          | UxaC         |                      | Monomer                                                | 89.1                                                | 75.3  | 58.1  | 5.3                                                             | 4.5   | 3.5   |
| P24215          | UxuA         |                      | Monomer                                                | 95.8                                                | 80.9  | 62.5  | 6.3                                                             | 5.3   | 4.1   |
| P39160          | UxuB         |                      | Monomer                                                | 89.3                                                | 75.5  | 58.3  | 5.3                                                             | 4.5   | 3.5   |
| P39161          | UxuR         |                      | Monomer                                                | 113.2                                               | 95.6  | 73.9  | 9.4                                                             | 7.9   | 6.1   |
| P07118          | ValS         | Cytoplasm            | Monomer                                                | 67.8                                                | 57.3  | 44.3  | 2.6                                                             | 2.2   | 1.7   |
| P76214          | Ves          |                      | Monomer                                                | 127.6                                               | 107.8 | 83.3  | 12.3                                                            | 10.4  | 8.0   |



| UniProtKB A. N. | Protein name | Subcellular location | Subunit               | $D_0 \left( \frac{\mu\text{m}^2}{\text{s}} \right)$ |       |       | $D_{\text{cyto}} \left( \frac{\mu\text{m}^2}{\text{s}} \right)$ |       |       |
|-----------------|--------------|----------------------|-----------------------|-----------------------------------------------------|-------|-------|-----------------------------------------------------------------|-------|-------|
|                 |              |                      |                       | 310 K                                               | 303 K | 293 K | 310 K                                                           | 303 K | 293 K |
| P0ADN0          | ViaA         |                      | Monomer               | 87.9                                                | 74.2  | 57.3  | 5.1                                                             | 4.3   | 3.3   |
| P25535          | VisC         |                      | Monomer               | 96.3                                                | 81.4  | 62.8  | 6.4                                                             | 5.4   | 4.2   |
| P09184          | Vsr          |                      | Monomer               | 137.0                                               | 115.7 | 89.4  | 14.4                                                            | 12.1  | 9.4   |
| P0AC75          | WaaA         | Cell inner membrane  | Monomer               | 93.8                                                | 79.3  | 61.2  | 6.0                                                             | 5.1   | 3.9   |
|                 |              |                      | Complex with SecB     | 65.9                                                | 53.8  | 43.0  | 2.4                                                             | 2.0   | 1.6   |
|                 |              |                      | Complex with TF (Tig) | 71.2                                                | 60.2  | 46.5  | 3.0                                                             | 2.5   | 2.0   |
| P27242          | WaaU         | Membrane             | Monomer               | 98.5                                                | 83.2  | 64.3  | 6.8                                                             | 5.7   | 4.4   |
|                 |              |                      | Complex with SecB     | 67.2                                                | 54.9  | 43.8  | 2.6                                                             | 2.1   | 1.7   |
|                 |              |                      | Complex with TF (Tig) | 72.9                                                | 61.6  | 47.6  | 3.2                                                             | 2.7   | 2.1   |
| P37750          | WbbJ         |                      | Monomer               | 127.4                                               | 107.6 | 83.1  | 12.2                                                            | 10.3  | 8.0   |
| P36667          | WbbL         |                      | Monomer               | 110.6                                               | 93.5  | 72.2  | 8.9                                                             | 7.5   | 5.8   |
| P77414          | WcaA         |                      | Monomer               | 108.0                                               | 91.2  | 70.5  | 8.4                                                             | 7.1   | 5.5   |
| P0ACC9          | WcaB         |                      | Monomer               | 138.2                                               | 116.7 | 90.2  | 14.6                                                            | 12.4  | 9.6   |
| P71237          | WcaC         |                      | Monomer               | 95.5                                                | 80.6  | 62.3  | 6.3                                                             | 5.3   | 4.1   |
| P71238          | WcaD         | Cell inner membrane  | Monomer               | 95.3                                                | 80.5  | 62.2  | 6.2                                                             | 5.3   | 4.1   |
|                 |              |                      | Complex with SecB     | 66.3                                                | 54.2  | 43.3  | 2.5                                                             | 2.0   | 1.6   |
|                 |              |                      | Complex with TF (Tig) | 71.8                                                | 60.7  | 46.8  | 3.1                                                             | 2.6   | 2.0   |
| P71239          | WcaE         |                      | Monomer               | 115.4                                               | 97.5  | 75.3  | 9.8                                                             | 8.3   | 6.4   |
| P0ACD2          | WcaF         |                      | Monomer               | 131.6                                               | 111.2 | 85.9  | 13.2                                                            | 11.1  | 8.6   |
| P32057          | WcaI         |                      | Monomer               | 95.7                                                | 80.9  | 62.5  | 6.3                                                             | 5.3   | 4.1   |
| P71241          | WcaJ         | Cell inner membrane  | Monomer               | 90.1                                                | 76.1  | 58.8  | 5.4                                                             | 4.6   | 3.6   |
|                 |              |                      | Complex with SecB     | 64.8                                                | 52.9  | 42.3  | 2.3                                                             | 1.9   | 1.5   |
|                 |              |                      | Complex with TF (Tig) | 69.8                                                | 59.0  | 45.5  | 2.8                                                             | 2.4   | 1.8   |
| P71242          | WcaK         |                      | Monomer               | 93.8                                                | 79.2  | 61.2  | 6.0                                                             | 5.1   | 3.9   |
| P71243          | WcaL         |                      | Monomer               | 95.4                                                | 80.6  | 62.2  | 6.3                                                             | 5.3   | 4.1   |
| P71244          | WcaM         |                      | Monomer               | 90.9                                                | 76.8  | 59.3  | 5.6                                                             | 4.7   | 3.6   |
| P0AC78          | WecA         | Cell inner membrane  | Monomer               | 99.3                                                | 83.9  | 64.8  | 6.9                                                             | 5.8   | 4.5   |
|                 |              |                      | Complex with SecB     | 67.4                                                | 55.0  | 44.0  | 2.6                                                             | 2.1   | 1.7   |
|                 |              |                      | Complex with TF (Tig) | 73.2                                                | 61.8  | 47.8  | 3.2                                                             | 2.7   | 2.1   |
| P27828          | WecB         | Cytoplasm            | Monomer               | 98.1                                                | 82.8  | 64.0  | 6.7                                                             | 5.7   | 4.4   |
|                 |              |                      | Homodimer             | 74.7                                                | 61.1  | 48.8  | 3.4                                                             | 2.8   | 2.2   |

| UniProtKB A. N. | Protein name | Subcellular location | Subunit               | $D_0 \left( \frac{\mu\text{m}^2}{\text{s}} \right)$ |       |       | $D_{\text{cyto}} \left( \frac{\mu\text{m}^2}{\text{s}} \right)$ |       |       |
|-----------------|--------------|----------------------|-----------------------|-----------------------------------------------------|-------|-------|-----------------------------------------------------------------|-------|-------|
|                 |              |                      |                       | 310 K                                               | 303 K | 293 K | 310 K                                                           | 303 K | 293 K |
| P27829          | WecC         |                      | Monomer               | 95.0                                                | 80.2  | 62.0  | 6.2                                                             | 5.2   | 4.0   |
| P56258          | WecF         | Cell inner membrane  | Monomer               | 99.6                                                | 84.1  | 65.0  | 6.9                                                             | 5.9   | 4.5   |
|                 |              |                      | Complex with SecB     | 67.5                                                | 55.1  | 44.0  | 2.6                                                             | 2.1   | 1.7   |
|                 |              |                      | Complex with TF (Tig) | 73.3                                                | 61.9  | 47.8  | 3.2                                                             | 2.7   | 2.1   |
| P27836          | WecG         |                      | Monomer               | 115.3                                               | 97.4  | 75.3  | 9.8                                                             | 8.3   | 6.4   |
| P0A8G6          | WrbA         |                      | Monomer               | 129.4                                               | 109.3 | 84.4  | 12.7                                                            | 10.7  | 8.3   |
|                 |              |                      | Homodimer             | 98.6                                                | 80.5  | 64.3  | 6.8                                                             | 5.5   | 4.4   |
|                 |              |                      | Homotetramer          | 75.1                                                | 63.5  | 49.0  | 3.4                                                             | 2.9   | 2.2   |
| P0A930          | Wza          | Cell outer membrane  | Monomer               | 98.4                                                | 83.1  | 64.2  | 6.7                                                             | 5.7   | 4.4   |
|                 |              |                      | Complex with SecB     | 67.1                                                | 54.9  | 43.8  | 2.6                                                             | 2.1   | 1.7   |
|                 |              |                      | Complex with TF (Tig) | 72.9                                                | 61.6  | 47.6  | 3.2                                                             | 2.7   | 2.1   |
| P0AAB2          | Wzb          |                      | Monomer               | 141.1                                               | 119.2 | 92.1  | 15.3                                                            | 12.9  | 10.0  |
| P76387          | Wzc          | Cell inner membrane  | Monomer               | 76.6                                                | 64.7  | 50.0  | 3.6                                                             | 3.1   | 2.4   |
|                 |              |                      | Complex with SecB     | 59.9                                                | 49.0  | 39.1  | 1.9                                                             | 1.5   | 1.2   |
|                 |              |                      | Complex with TF (Tig) | 63.6                                                | 53.7  | 41.5  | 2.2                                                             | 1.9   | 1.4   |
| P77377          | WzxC         | Cell inner membrane  | Monomer               | 89.3                                                | 75.4  | 58.3  | 5.3                                                             | 4.5   | 3.5   |
|                 |              |                      | Complex with SecB     | 64.5                                                | 52.7  | 42.1  | 2.3                                                             | 1.9   | 1.5   |
|                 |              |                      | Complex with TF (Tig) | 69.4                                                | 58.7  | 45.3  | 2.8                                                             | 2.4   | 1.8   |
| P0AAA7          | WzxE         | Cell inner membrane  | Monomer               | 95.7                                                | 80.9  | 62.5  | 6.3                                                             | 5.3   | 4.1   |
|                 |              |                      | Complex with SecB     | 66.4                                                | 54.3  | 43.4  | 2.5                                                             | 2.0   | 1.6   |
|                 |              |                      | Complex with TF (Tig) | 71.9                                                | 60.8  | 46.9  | 3.1                                                             | 2.6   | 2.0   |
| P27835          | WzyE         | Cell membrane        | Monomer               | 90.7                                                | 76.6  | 59.2  | 5.5                                                             | 4.7   | 3.6   |
|                 |              |                      | Complex with SecB     | 65.0                                                | 53.1  | 42.4  | 2.3                                                             | 1.9   | 1.5   |
|                 |              |                      | Complex with TF (Tig) | 70.0                                                | 59.2  | 45.7  | 2.9                                                             | 2.4   | 1.9   |
| P76372          | WzzB         | Cell inner membrane  | Monomer               | 103.9                                               | 87.8  | 67.8  | 7.7                                                             | 6.5   | 5.0   |
|                 |              |                      | Complex with SecB     | 68.5                                                | 56.0  | 44.7  | 2.7                                                             | 2.2   | 1.8   |
|                 |              |                      | Complex with TF (Tig) | 74.7                                                | 63.1  | 48.7  | 3.4                                                             | 2.9   | 2.2   |
| P0AG00          | WzzE         | Cell inner membrane  | Monomer               | 100.7                                               | 85.1  | 65.7  | 7.1                                                             | 6.0   | 4.6   |
|                 |              |                      | Complex with SecB     | 67.7                                                | 55.3  | 44.2  | 2.6                                                             | 2.1   | 1.7   |
|                 |              |                      | Complex with TF (Tig) | 73.7                                                | 62.2  | 48.1  | 3.3                                                             | 2.8   | 2.1   |
| P0AGM9          | XanP         | Cell inner membrane  | Monomer               | 92.6                                                | 78.3  | 60.4  | 5.8                                                             | 4.9   | 3.8   |

| UniProtKB A. N. | Protein name | Subcellular location | Subunit                                                  | $D_0 \left( \frac{\mu\text{m}^2}{\text{s}} \right)$ |       |       | $D_{\text{cyto}} \left( \frac{\mu\text{m}^2}{\text{s}} \right)$ |       |       |
|-----------------|--------------|----------------------|----------------------------------------------------------|-----------------------------------------------------|-------|-------|-----------------------------------------------------------------|-------|-------|
|                 |              |                      |                                                          | 310 K                                               | 303 K | 293 K | 310 K                                                           | 303 K | 293 K |
|                 |              |                      | Complex with SecB                                        | 65.6                                                | 53.6  | 42.8  | 2.4                                                             | 2.0   | 1.6   |
|                 |              |                      | Complex with TF (Tig)                                    | 70.8                                                | 59.8  | 46.2  | 2.9                                                             | 2.5   | 1.9   |
| P67444          | XanQ         | Cell inner membrane  | Monomer                                                  | 92.4                                                | 78.1  | 60.3  | 5.8                                                             | 4.9   | 3.8   |
|                 |              |                      | Complex with SecB                                        | 65.5                                                | 53.5  | 42.8  | 2.4                                                             | 2.0   | 1.6   |
|                 |              |                      | Complex with TF (Tig)                                    | 70.7                                                | 59.7  | 46.1  | 2.9                                                             | 2.5   | 1.9   |
| P45563          | XapA         |                      | Monomer                                                  | 112.4                                               | 95.0  | 73.3  | 9.2                                                             | 7.8   | 6.0   |
| P45562          | XapB         | Cell inner membrane  | Monomer                                                  | 94.7                                                | 80.0  | 61.8  | 6.2                                                             | 5.2   | 4.0   |
|                 |              |                      | Complex with SecB                                        | 66.2                                                | 54.1  | 43.2  | 2.5                                                             | 2.0   | 1.6   |
|                 |              |                      | Complex with TF (Tig)                                    | 71.6                                                | 60.5  | 46.7  | 3.0                                                             | 2.6   | 2.0   |
| P23841          | XapR         |                      | Monomer                                                  | 107.2                                               | 90.6  | 70.0  | 8.3                                                             | 7.0   | 5.4   |
| Q46799          | XdhA         |                      | Monomer                                                  | 75.9                                                | 64.1  | 49.5  | 3.5                                                             | 3.0   | 2.3   |
|                 |              |                      | Heterotrimer (XdhA–XdhB–XdhC)                            | 63.2                                                | 53.4  | 41.2  | 2.2                                                             | 1.8   | 1.4   |
| Q46800          | XdhB         |                      | Monomer                                                  | 109.9                                               | 92.9  | 71.7  | 8.8                                                             | 7.4   | 5.7   |
|                 |              |                      | Heterotrimer (XdhA–XdhB–XdhC)                            | 63.2                                                | 53.4  | 41.2  | 2.2                                                             | 1.8   | 1.4   |
| Q46801          | XdhC         |                      | Monomer                                                  | 140.4                                               | 118.6 | 91.6  | 15.2                                                            | 12.8  | 9.9   |
|                 |              |                      | Heterotrimer (XdhA–XdhB–XdhC)                            | 63.2                                                | 53.4  | 41.2  | 2.2                                                             | 1.8   | 1.4   |
| Q46814          | XdhD         |                      | Monomer                                                  | 69.0                                                | 58.3  | 45.0  | 2.7                                                             | 2.3   | 1.8   |
| P0A8P6          | XerC         | Cytoplasm            | Monomer                                                  | 106.9                                               | 90.3  | 69.8  | 8.2                                                             | 6.9   | 5.4   |
|                 |              |                      | Heterotetramer (XerC <sub>2</sub> –XerD <sub>2</sub> )   | 62.0                                                | 52.4  | 40.4  | 2.1                                                             | 1.7   | 1.3   |
| P0A8P8          | XerD         | Cytoplasm            | Monomer                                                  | 106.5                                               | 90.0  | 69.5  | 8.1                                                             | 6.9   | 5.3   |
|                 |              |                      | Heterotetramer (XerC <sub>2</sub> –XerD <sub>2</sub> )   | 62.0                                                | 52.4  | 40.4  | 2.1                                                             | 1.7   | 1.3   |
| P75970          | XisE         |                      | Monomer                                                  | 177.6                                               | 150.0 | 115.9 | 24.8                                                            | 21.0  | 16.2  |
| P04994          | XseA         | Cytoplasm            | Monomer                                                  | 90.5                                                | 76.5  | 59.1  | 5.5                                                             | 4.7   | 3.6   |
|                 |              |                      | Heterooligomer ((XseA–XseB <sub>4</sub> ) <sub>2</sub> ) | 56.1                                                | 47.4  | 36.6  | 1.6                                                             | 1.3   | 1.0   |
| P0A8G9          | XseB         | Cytoplasm            | Monomer                                                  | 180.2                                               | 152.2 | 117.6 | 25.5                                                            | 21.6  | 16.7  |
|                 |              |                      | Heterooligomer ((XseA–XseB <sub>4</sub> ) <sub>2</sub> ) | 56.1                                                | 47.4  | 36.6  | 1.6                                                             | 1.3   | 1.0   |
| P09030          | XthA         |                      | Monomer                                                  | 110.8                                               | 93.6  | 72.3  | 8.9                                                             | 7.5   | 5.8   |
| P00944          | XylA         | Cytoplasm            | Monomer                                                  | 92.0                                                | 77.7  | 60.0  | 5.7                                                             | 4.8   | 3.7   |
|                 |              |                      | Homotetramer                                             | 53.4                                                | 43.6  | 34.9  | 1.3                                                             | 1.1   | 0.9   |
| P09099          | XylB         |                      | Monomer                                                  | 90.0                                                | 76.0  | 58.7  | 5.4                                                             | 4.6   | 3.5   |
| P0AGF4          | XylE         | Cell inner membrane  | Monomer                                                  | 89.3                                                | 75.5  | 58.3  | 5.3                                                             | 4.5   | 3.5   |

| UniProtKB A. N. | Protein name | Subcellular location | Subunit               | $D_0 \left( \frac{\mu\text{m}^2}{\text{s}} \right)$ |       |       | $D_{\text{cyto}} \left( \frac{\mu\text{m}^2}{\text{s}} \right)$ |       |       |
|-----------------|--------------|----------------------|-----------------------|-----------------------------------------------------|-------|-------|-----------------------------------------------------------------|-------|-------|
|                 |              |                      |                       | 310 K                                               | 303 K | 293 K | 310 K                                                           | 303 K | 293 K |
|                 |              |                      | Complex with SecB     | 64.6                                                | 52.7  | 42.1  | 2.3                                                             | 1.9   | 1.5   |
|                 |              |                      | Complex with TF (Tig) | 69.5                                                | 58.7  | 45.3  | 2.8                                                             | 2.4   | 1.8   |
| P37387          | XylF         | Periplasm            | Monomer               | 104.7                                               | 88.5  | 68.3  | 7.8                                                             | 6.6   | 5.1   |
|                 |              |                      | Complex with SecB     | 68.7                                                | 56.1  | 44.8  | 2.7                                                             | 2.2   | 1.8   |
|                 |              |                      | Complex with TF (Tig) | 74.9                                                | 63.3  | 48.9  | 3.4                                                             | 2.9   | 2.2   |
| P37388          | XylG         | Cell inner membrane  | Monomer               | 87.5                                                | 73.9  | 57.1  | 5.1                                                             | 4.3   | 3.3   |
|                 |              |                      | Complex with SecB     | 64.0                                                | 52.3  | 41.8  | 2.2                                                             | 1.8   | 1.5   |
|                 |              |                      | Complex with TF (Tig) | 68.7                                                | 58.1  | 44.8  | 2.7                                                             | 2.3   | 1.8   |
| P0AGI4          | XylH         | Cell inner membrane  | Monomer               | 99.2                                                | 83.8  | 64.7  | 6.9                                                             | 5.8   | 4.5   |
|                 |              |                      | Complex with SecB     | 67.4                                                | 55.0  | 44.0  | 2.6                                                             | 2.1   | 1.7   |
|                 |              |                      | Complex with TF (Tig) | 73.2                                                | 61.8  | 47.7  | 3.2                                                             | 2.7   | 2.1   |
| P0ACI3          | XylR         |                      | Monomer               | 95.8                                                | 80.9  | 62.5  | 6.3                                                             | 5.3   | 4.1   |
| P0A8I3          | YaaA         |                      | Monomer               | 112.8                                               | 95.3  | 73.6  | 9.3                                                             | 7.8   | 6.1   |
| P0AC98          | YaaH         | Cell inner membrane  | Monomer               | 131.3                                               | 110.9 | 85.7  | 13.1                                                            | 11.1  | 8.5   |
|                 |              |                      | Complex with SecB     | 73.2                                                | 59.8  | 47.7  | 3.2                                                             | 2.6   | 2.1   |
|                 |              |                      | Complex with TF (Tig) | 81.3                                                | 68.6  | 53.0  | 4.2                                                             | 3.6   | 2.7   |
| P28696          | YaaI         |                      | Monomer               | 149.2                                               | 126.1 | 97.4  | 17.3                                                            | 14.6  | 11.3  |
| P30143          | YaaJ         | Cell inner membrane  | Monomer               | 90.6                                                | 76.6  | 59.1  | 5.5                                                             | 4.7   | 3.6   |
|                 |              |                      | Complex with SecB     | 65.0                                                | 53.1  | 42.4  | 2.3                                                             | 1.9   | 1.5   |
|                 |              |                      | Complex with TF (Tig) | 70.0                                                | 59.1  | 45.7  | 2.9                                                             | 2.4   | 1.9   |
| P31679          | YaaU         | Cell inner membrane  | Monomer               | 92.8                                                | 78.4  | 60.5  | 5.8                                                             | 4.9   | 3.8   |
|                 |              |                      | Complex with SecB     | 65.6                                                | 53.6  | 42.8  | 2.4                                                             | 2.0   | 1.6   |
|                 |              |                      | Complex with TF (Tig) | 70.8                                                | 59.8  | 46.2  | 2.9                                                             | 2.5   | 1.9   |
| P75617          | YaaW         |                      | Monomer               | 117.5                                               | 99.2  | 76.6  | 10.2                                                            | 8.6   | 6.7   |
| P75616          | YaaX         |                      | Monomer               | 164.1                                               | 138.7 | 107.1 | 21.1                                                            | 17.8  | 13.8  |
| P75620          | YaaY         |                      | Monomer               | 189.3                                               | 159.9 | 123.5 | 28.2                                                            | 23.8  | 18.4  |
| P30149          | YabI         | Cell inner membrane  | Monomer               | 114.8                                               | 97.0  | 74.9  | 9.7                                                             | 8.2   | 6.3   |
|                 |              |                      | Complex with SecB     | 70.7                                                | 57.8  | 46.1  | 2.9                                                             | 2.4   | 1.9   |
|                 |              |                      | Complex with TF (Tig) | 77.7                                                | 65.7  | 50.7  | 3.8                                                             | 3.2   | 2.4   |
| P39220          | YabP         |                      | Monomer               | 120.9                                               | 102.1 | 78.9  | 10.9                                                            | 9.2   | 7.1   |
| P39221          | YabQ         |                      | Monomer               | 214.5                                               | 181.2 | 140.0 | 36.1                                                            | 30.5  | 23.5  |

| UniProtKB A. N. | Protein name | Subcellular location | Subunit               | $D_0 \left( \frac{\mu\text{m}^2}{\text{s}} \right)$ |       |       | $D_{\text{cyto}} \left( \frac{\mu\text{m}^2}{\text{s}} \right)$ |       |       |
|-----------------|--------------|----------------------|-----------------------|-----------------------------------------------------|-------|-------|-----------------------------------------------------------------|-------|-------|
|                 |              |                      |                       | 310 K                                               | 303 K | 293 K | 310 K                                                           | 303 K | 293 K |
| P0AA95          | YacC         |                      | Monomer               | 156.3                                               | 132.1 | 102.0 | 19.1                                                            | 16.1  | 12.4  |
| P36680          | YacF         |                      | Monomer               | 114.8                                               | 96.9  | 74.9  | 9.7                                                             | 8.2   | 6.3   |
| P0A8H8          | YacG         |                      | Monomer               | 195.1                                               | 164.8 | 127.3 | 30.0                                                            | 25.3  | 19.6  |
| P36682          | YacH         |                      | Monomer               | 80.7                                                | 68.2  | 52.7  | 4.1                                                             | 3.5   | 2.7   |
| P0A8E5          | YacL         |                      | Monomer               | 151.4                                               | 127.9 | 98.8  | 17.8                                                            | 15.1  | 11.6  |
| P31058          | YadC         | Fimbrium             | Monomer               | 95.8                                                | 80.9  | 62.5  | 6.3                                                             | 5.3   | 4.1   |
|                 |              |                      | Complex with SecB     | 66.5                                                | 54.3  | 43.4  | 2.5                                                             | 2.0   | 1.6   |
|                 |              |                      | Complex with TF (Tig) | 71.9                                                | 60.8  | 46.9  | 3.1                                                             | 2.6   | 2.0   |
| P31665          | YadD         |                      | Monomer               | 106.0                                               | 89.6  | 69.2  | 8.1                                                             | 6.8   | 5.3   |
| P31666          | YadE         |                      | Monomer               | 94.6                                                | 79.9  | 61.7  | 6.1                                                             | 5.2   | 4.0   |
| P36879          | YadG         |                      | Monomer               | 106.0                                               | 89.5  | 69.2  | 8.0                                                             | 6.8   | 5.2   |
| P0AFN6          | YadH         | Cell inner membrane  | Monomer               | 114.4                                               | 96.6  | 74.7  | 9.6                                                             | 8.1   | 6.3   |
|                 |              |                      | Complex with SecB     | 70.6                                                | 57.7  | 46.1  | 2.9                                                             | 2.4   | 1.9   |
|                 |              |                      | Complex with TF (Tig) | 77.6                                                | 65.6  | 50.7  | 3.7                                                             | 3.2   | 2.4   |
| P36881          | YadI         | Cytoplasm            | Monomer               | 141.6                                               | 119.7 | 92.4  | 15.4                                                            | 13.0  | 10.1  |
| P37016          | YadK         |                      | Monomer               | 128.7                                               | 108.7 | 84.0  | 12.5                                                            | 10.6  | 8.2   |
| P37017          | YadL         |                      | Monomer               | 128.9                                               | 108.9 | 84.1  | 12.6                                                            | 10.6  | 8.2   |
| P37018          | YadM         |                      | Monomer               | 130.7                                               | 110.4 | 85.3  | 13.0                                                            | 10.9  | 8.5   |
| P37050          | YadN         | Fimbrium             | Monomer               | 131.2                                               | 110.8 | 85.6  | 13.1                                                            | 11.0  | 8.5   |
|                 |              |                      | Complex with SecB     | 73.2                                                | 59.8  | 47.7  | 3.2                                                             | 2.6   | 2.1   |
|                 |              |                      | Complex with TF (Tig) | 81.2                                                | 68.6  | 53.0  | 4.2                                                             | 3.5   | 2.7   |
| P0AFP0          | YadS         | Cell inner membrane  | Monomer               | 126.4                                               | 106.8 | 82.5  | 12.0                                                            | 10.2  | 7.8   |
|                 |              |                      | Complex with SecB     | 72.5                                                | 59.2  | 47.3  | 3.1                                                             | 2.6   | 2.0   |
|                 |              |                      | Complex with TF (Tig) | 80.3                                                | 67.8  | 52.4  | 4.1                                                             | 3.4   | 2.7   |
| P28634          | YaeB         |                      | Monomer               | 118.0                                               | 99.7  | 77.0  | 10.3                                                            | 8.7   | 6.7   |
| P37056          | YaeF         | Cell membrane        | Monomer               | 112.3                                               | 94.9  | 73.3  | 9.2                                                             | 7.8   | 6.0   |
|                 |              |                      | Complex with SecB     | 70.2                                                | 57.4  | 45.8  | 2.9                                                             | 2.4   | 1.9   |
|                 |              |                      | Complex with TF (Tig) | 77.1                                                | 65.1  | 50.3  | 3.7                                                             | 3.1   | 2.4   |
| P62768          | YaeH         |                      | Monomer               | 146.8                                               | 124.0 | 95.8  | 16.7                                                            | 14.1  | 10.9  |
| P37049          | YaeI         |                      | Monomer               | 112.4                                               | 94.9  | 73.3  | 9.2                                                             | 7.8   | 6.0   |
| P40711          | YaeJ         |                      | Monomer               | 144.8                                               | 122.4 | 94.5  | 16.2                                                            | 13.7  | 10.6  |

| UniProtKB A. N. | Protein name | Subcellular location | Subunit               | $D_0 \left( \frac{\mu\text{m}^2}{\text{s}} \right)$ |       |       | $D_{\text{cyto}} \left( \frac{\mu\text{m}^2}{\text{s}} \right)$ |       |       |
|-----------------|--------------|----------------------|-----------------------|-----------------------------------------------------|-------|-------|-----------------------------------------------------------------|-------|-------|
|                 |              |                      |                       | 310 K                                               | 303 K | 293 K | 310 K                                                           | 303 K | 293 K |
| P0A8K5          | YaeP         |                      | Monomer               | 196.1                                               | 165.6 | 128.0 | 30.3                                                            | 25.6  | 19.7  |
| P0AA97          | YaeQ         |                      | Monomer               | 129.3                                               | 109.2 | 84.4  | 12.7                                                            | 10.7  | 8.3   |
| P52096          | YaeR         |                      | Monomer               | 148.2                                               | 125.2 | 96.7  | 17.0                                                            | 14.4  | 11.1  |
| P0A940          | YaeT         | Cell outer membrane  | Monomer               | 72.7                                                | 61.4  | 47.5  | 3.2                                                             | 2.7   | 2.1   |
|                 |              |                      | Complex with SecB     | 58.2                                                | 47.6  | 38.0  | 1.7                                                             | 1.4   | 1.1   |
|                 |              |                      | Complex with TF (Tig) | 61.5                                                | 52.0  | 40.2  | 2.0                                                             | 1.7   | 1.3   |
| P30864          | YafC         |                      | Monomer               | 107.1                                               | 90.4  | 69.9  | 8.2                                                             | 7.0   | 5.4   |
| P0A8U2          | YafD         | Cytoplasm            | Monomer               | 112.2                                               | 94.8  | 73.2  | 9.2                                                             | 7.8   | 6.0   |
| P30866          | YafE         |                      | Monomer               | 124.5                                               | 105.2 | 81.2  | 11.6                                                            | 9.8   | 7.6   |
| Q2EEP9          | YafF         |                      | Monomer               | 198.9                                               | 168.1 | 129.8 | 31.1                                                            | 26.3  | 20.3  |
| Q47147          | YafJ         |                      | Monomer               | 114.2                                               | 96.5  | 74.5  | 9.6                                                             | 8.1   | 6.2   |
| P0AA99          | YafK         |                      | Monomer               | 115.2                                               | 97.3  | 75.2  | 9.8                                                             | 8.2   | 6.4   |
| Q47151          | YafL         | Cell membrane        | Monomer               | 114.0                                               | 96.3  | 74.4  | 9.5                                                             | 8.0   | 6.2   |
|                 |              |                      | Complex with SecB     | 70.5                                                | 57.6  | 46.0  | 2.9                                                             | 2.4   | 1.9   |
|                 |              |                      | Complex with TF (Tig) | 77.5                                                | 65.5  | 50.6  | 3.7                                                             | 3.1   | 2.4   |
| Q47152          | YafM         |                      | Monomer               | 131.4                                               | 111.0 | 85.7  | 13.1                                                            | 11.1  | 8.6   |
| Q47156          | YafN         |                      | Monomer               | 164.8                                               | 139.2 | 107.6 | 21.3                                                            | 18.0  | 13.9  |
| Q47157          | YafO         |                      | Monomer               | 145.3                                               | 122.8 | 94.8  | 16.3                                                            | 13.8  | 10.7  |
| Q47158          | YafP         |                      | Monomer               | 138.4                                               | 116.9 | 90.3  | 14.7                                                            | 12.4  | 9.6   |
| Q47149          | YafQ         |                      | Monomer               | 167.1                                               | 141.2 | 109.0 | 21.9                                                            | 18.5  | 14.3  |
| P75672          | YafS         |                      | Monomer               | 116.5                                               | 98.4  | 76.0  | 10.0                                                            | 8.5   | 6.5   |
| P77339          | YafT         | Cell membrane        | Monomer               | 112.7                                               | 95.2  | 73.6  | 9.3                                                             | 7.8   | 6.1   |
|                 |              |                      | Complex with SecB     | 70.3                                                | 57.4  | 45.9  | 2.9                                                             | 2.4   | 1.9   |
|                 |              |                      | Complex with TF (Tig) | 77.2                                                | 65.2  | 50.4  | 3.7                                                             | 3.1   | 2.4   |
| P77354          | YafU         | Cell inner membrane  | Monomer               | 159.9                                               | 135.1 | 104.3 | 20.0                                                            | 16.9  | 13.0  |
|                 |              |                      | Complex with SecB     | 75.9                                                | 62.0  | 49.5  | 3.5                                                             | 2.9   | 2.3   |
|                 |              |                      | Complex with TF (Tig) | 85.3                                                | 72.0  | 55.7  | 4.7                                                             | 4.0   | 3.1   |
| Q47679          | YafV         |                      | Monomer               | 113.8                                               | 96.1  | 74.2  | 9.5                                                             | 8.0   | 6.2   |
| Q47684          | YafW         |                      | Monomer               | 160.9                                               | 136.0 | 105.0 | 20.3                                                            | 17.1  | 13.2  |
| P75676          | YafX         |                      | Monomer               | 138.8                                               | 117.2 | 90.6  | 14.8                                                            | 12.5  | 9.6   |
| P77365          | YafY         | Cell membrane        | Monomer               | 140.7                                               | 118.9 | 91.8  | 15.2                                                            | 12.9  | 9.9   |

| UniProtKB A. N. | Protein name | Subcellular location | Subunit                       | $D_0 \left( \frac{\mu\text{m}^2}{\text{s}} \right)$ |       |       | $D_{\text{cyto}} \left( \frac{\mu\text{m}^2}{\text{s}} \right)$ |       |       |
|-----------------|--------------|----------------------|-------------------------------|-----------------------------------------------------|-------|-------|-----------------------------------------------------------------|-------|-------|
|                 |              |                      |                               | 310 K                                               | 303 K | 293 K | 310 K                                                           | 303 K | 293 K |
|                 |              |                      | Complex with SecB             | 74.2                                                | 60.7  | 48.4  | 3.3                                                             | 2.7   | 2.2   |
|                 |              |                      | Complex with TF (Tig)         | 82.8                                                | 70.0  | 54.0  | 4.4                                                             | 3.7   | 2.9   |
| P77206          | YafZ         |                      | Monomer                       | 110.6                                               | 93.5  | 72.2  | 8.9                                                             | 7.5   | 5.8   |
| P37007          | YagA         |                      | Monomer                       | 96.7                                                | 81.7  | 63.1  | 6.5                                                             | 5.5   | 4.2   |
| P37008          | YagB         |                      | Monomer                       | 154.8                                               | 130.8 | 101.0 | 18.7                                                            | 15.8  | 12.2  |
| P75682          | YagE         |                      | Monomer                       | 107.6                                               | 90.9  | 70.2  | 8.3                                                             | 7.0   | 5.4   |
| P77596          | YagF         |                      | Monomer                       | 80.7                                                | 68.2  | 52.7  | 4.1                                                             | 3.5   | 2.7   |
|                 |              |                      | Monomer                       | 91.3                                                | 77.2  | 59.6  | 5.6                                                             | 4.8   | 3.7   |
| P75683          | YagG         | Cell inner membrane  | Complex with SecB             | 65.2                                                | 53.3  | 42.5  | 2.4                                                             | 1.9   | 1.5   |
|                 |              |                      | Complex with TF (Tig)         | 70.3                                                | 59.4  | 45.9  | 2.9                                                             | 2.4   | 1.9   |
| P77713          | YagH         |                      | Monomer                       | 85.0                                                | 71.8  | 55.5  | 4.7                                                             | 4.0   | 3.1   |
| P77300          | YagI         |                      | Monomer                       | 115.5                                               | 97.6  | 75.4  | 9.8                                                             | 8.3   | 6.4   |
| P77169          | YagJ         |                      | Monomer                       | 115.5                                               | 97.5  | 75.3  | 9.8                                                             | 8.3   | 6.4   |
| P77657          | YagK         |                      | Monomer                       | 121.5                                               | 102.6 | 79.3  | 11.0                                                            | 9.3   | 7.2   |
| P77607          | YagL         |                      | Monomer                       | 116.4                                               | 98.4  | 76.0  | 10.0                                                            | 8.4   | 6.5   |
| P71296          | YagM         |                      | Monomer                       | 108.5                                               | 91.6  | 70.8  | 8.5                                                             | 7.2   | 5.5   |
| P71297          | YagN         |                      | Monomer                       | 144.1                                               | 121.8 | 94.1  | 16.0                                                            | 13.6  | 10.5  |
| P75684          | YagP         |                      | Monomer                       | 145.6                                               | 123.0 | 95.0  | 16.4                                                            | 13.9  | 10.7  |
| P77183          | YagQ         |                      | Monomer                       | 105.6                                               | 89.2  | 68.9  | 8.0                                                             | 6.7   | 5.2   |
|                 |              |                      | Monomer                       | 77.1                                                | 65.1  | 50.3  | 3.7                                                             | 3.1   | 2.4   |
| P77489          | YagR         |                      | Heterotrimer (YagR–YagS–YagT) | 62.0                                                | 52.3  | 40.4  | 2.0                                                             | 1.7   | 1.3   |
|                 |              |                      | Monomer                       | 107.0                                               | 90.4  | 69.8  | 8.2                                                             | 6.9   | 5.4   |
| P77324          | YagS         |                      | Heterotrimer (YagR–YagS–YagT) | 62.0                                                | 52.3  | 40.4  | 2.0                                                             | 1.7   | 1.3   |
|                 |              |                      | Monomer                       | 121.7                                               | 102.8 | 79.4  | 11.1                                                            | 9.3   | 7.2   |
| P77165          | YagT         |                      | Heterotrimer (YagR–YagS–YagT) | 62.0                                                | 52.3  | 40.4  | 2.0                                                             | 1.7   | 1.3   |
|                 |              |                      | Monomer                       | 124.5                                               | 105.2 | 81.3  | 11.6                                                            | 9.8   | 7.6   |
| P0AAA1          | YagU         | Cell inner membrane  | Complex with SecB             | 72.3                                                | 59.0  | 47.2  | 3.1                                                             | 2.5   | 2.0   |
|                 |              |                      | Complex with TF (Tig)         | 79.9                                                | 67.5  | 52.2  | 4.0                                                             | 3.4   | 2.6   |
| P77263          | YagV         |                      | Monomer                       | 117.5                                               | 99.3  | 76.7  | 10.2                                                            | 8.6   | 6.7   |
| P77694          | YagW         |                      | Monomer                       | 85.5                                                | 72.2  | 55.8  | 4.8                                                             | 4.0   | 3.1   |
| P77802          | YagX         |                      | Monomer                       | 72.5                                                | 61.3  | 47.3  | 3.1                                                             | 2.6   | 2.0   |

| UniProtKB A. N. | Protein name | Subcellular location | Subunit               | $D_0 \left( \frac{\mu\text{m}^2}{\text{s}} \right)$ |       |       | $D_{\text{cyto}} \left( \frac{\mu\text{m}^2}{\text{s}} \right)$ |       |       |
|-----------------|--------------|----------------------|-----------------------|-----------------------------------------------------|-------|-------|-----------------------------------------------------------------|-------|-------|
|                 |              |                      |                       | 310 K                                               | 303 K | 293 K | 310 K                                                           | 303 K | 293 K |
| P21514          | YahA         |                      | Monomer               | 99.5                                                | 84.0  | 64.9  | 6.9                                                             | 5.8   | 4.5   |
| P77700          | YahB         |                      | Monomer               | 105.7                                               | 89.3  | 69.0  | 8.0                                                             | 6.8   | 5.2   |
| P77219          | YahC         | Cell membrane        | Monomer               | 139.1                                               | 117.5 | 90.8  | 14.9                                                            | 12.6  | 9.7   |
|                 |              |                      | Complex with SecB     | 74.1                                                | 60.5  | 48.3  | 3.3                                                             | 2.7   | 2.2   |
|                 |              |                      | Complex with TF (Tig) | 82.6                                                | 69.8  | 53.9  | 4.4                                                             | 3.7   | 2.9   |
| P77736          | YahD         |                      | Monomer               | 127.4                                               | 107.6 | 83.1  | 12.2                                                            | 10.3  | 8.0   |
| P77297          | YahE         |                      | Monomer               | 109.0                                               | 92.1  | 71.1  | 8.6                                                             | 7.3   | 5.6   |
| P77187          | YahF         |                      | Monomer               | 88.1                                                | 74.4  | 57.5  | 5.1                                                             | 4.3   | 3.4   |
| P77221          | YahG         | Cell membrane        | Monomer               | 91.5                                                | 77.3  | 59.7  | 5.7                                                             | 4.8   | 3.7   |
|                 |              |                      | Complex with SecB     | 65.2                                                | 53.3  | 42.6  | 2.4                                                             | 1.9   | 1.5   |
|                 |              |                      | Complex with TF (Tig) | 70.4                                                | 59.4  | 45.9  | 2.9                                                             | 2.4   | 1.9   |
| Q2EEQ3          | YahH         |                      | Monomer               | 168.4                                               | 142.3 | 109.9 | 22.3                                                            | 18.8  | 14.5  |
| P77624          | YahI         |                      | Monomer               | 106.9                                               | 90.3  | 69.7  | 8.2                                                             | 6.9   | 5.4   |
| P77554          | YahJ         |                      | Monomer               | 91.4                                                | 77.2  | 59.6  | 5.6                                                             | 4.8   | 3.7   |
| P75691          | YahK         |                      | Monomer               | 102.2                                               | 86.4  | 66.7  | 7.4                                                             | 6.2   | 4.8   |
| P77393          | YahL         |                      | Monomer               | 109.6                                               | 92.6  | 71.5  | 8.7                                                             | 7.4   | 5.7   |
| P75692          | YahM         |                      | Monomer               | 180.7                                               | 152.6 | 117.9 | 25.7                                                            | 21.7  | 16.8  |
| P75693          | YahN         | Cell membrane        | Monomer               | 120.8                                               | 102.1 | 78.8  | 10.9                                                            | 9.2   | 7.1   |
|                 |              |                      | Complex with SecB     | 71.7                                                | 58.6  | 46.8  | 3.0                                                             | 2.5   | 2.0   |
|                 |              |                      | Complex with TF (Tig) | 79.1                                                | 66.9  | 51.6  | 3.9                                                             | 3.3   | 2.6   |
| P75694          | YahO         | Periplasm            | Monomer               | 173.2                                               | 146.3 | 113.0 | 23.6                                                            | 19.9  | 15.4  |
|                 |              |                      | Complex with SecB     | 76.7                                                | 62.7  | 50.1  | 3.6                                                             | 3.0   | 2.4   |
|                 |              |                      | Complex with TF (Tig) | 86.6                                                | 73.1  | 56.5  | 4.9                                                             | 4.2   | 3.2   |
| P0AAN5          | YaiA         |                      | Monomer               | 195.4                                               | 165.1 | 127.5 | 30.0                                                            | 25.4  | 19.6  |
| P0C037          | YaiE         |                      | Monomer               | 171.0                                               | 144.4 | 111.6 | 23.0                                                            | 19.4  | 15.0  |
| P0A8D3          | YaiI         |                      | Monomer               | 140.2                                               | 118.5 | 91.5  | 15.1                                                            | 12.8  | 9.9   |
| P51024          | YaiL         |                      | Monomer               | 131.7                                               | 111.2 | 85.9  | 13.2                                                            | 11.1  | 8.6   |
| Q47534          | YaiO         |                      | Monomer               | 113.6                                               | 96.0  | 74.1  | 9.4                                                             | 8.0   | 6.2   |
| Q47536          | YaiP         |                      | Monomer               | 95.9                                                | 81.0  | 62.6  | 6.3                                                             | 5.4   | 4.1   |
| P71311          | YaiS         |                      | Monomer               | 130.2                                               | 110.0 | 85.0  | 12.9                                                            | 10.9  | 8.4   |
| P77199          | YaiT         |                      | Monomer               | 68.7                                                | 58.0  | 44.8  | 2.7                                                             | 2.3   | 1.8   |



| UniProtKB A. N. | Protein name | Subcellular location | Subunit               | $D_0 \left( \frac{\mu\text{m}^2}{\text{s}} \right)$ |       |       | $D_{\text{cyto}} \left( \frac{\mu\text{m}^2}{\text{s}} \right)$ |       |       |
|-----------------|--------------|----------------------|-----------------------|-----------------------------------------------------|-------|-------|-----------------------------------------------------------------|-------|-------|
|                 |              |                      |                       | 310 K                                               | 303 K | 293 K | 310 K                                                           | 303 K | 293 K |
| P0AAP5          | YaiV         |                      | Monomer               | 122.5                                               | 103.5 | 79.9  | 11.2                                                            | 9.5   | 7.3   |
| P77562          | YaiW         |                      | Monomer               | 99.8                                                | 84.3  | 65.1  | 7.0                                                             | 5.9   | 4.6   |
| P75697          | YaiX         |                      | Monomer               | 120.6                                               | 101.9 | 78.7  | 10.8                                                            | 9.1   | 7.1   |
| P0AAP7          | YaiY         | Cell inner membrane  | Monomer               | 163.7                                               | 138.3 | 106.9 | 21.0                                                            | 17.7  | 13.7  |
|                 |              |                      | Complex with SecB     | 76.2                                                | 62.2  | 49.7  | 3.6                                                             | 2.9   | 2.3   |
|                 |              |                      | Complex with TF (Tig) | 85.7                                                | 72.4  | 55.9  | 4.8                                                             | 4.1   | 3.1   |
| P0AAQ0          | YaiZ         | Cell membrane        | Monomer               | 187.4                                               | 158.3 | 122.3 | 27.7                                                            | 23.4  | 18.0  |
|                 |              |                      | Complex with SecB     | 77.4                                                | 63.3  | 50.5  | 3.7                                                             | 3.0   | 2.4   |
|                 |              |                      | Complex with TF (Tig) | 87.6                                                | 74.0  | 57.2  | 5.1                                                             | 4.3   | 3.3   |
| P0ADZ7          | YajC         | Cell inner membrane  | Monomer               | 161.2                                               | 136.2 | 105.2 | 20.3                                                            | 17.2  | 13.3  |
|                 |              |                      | Complex with SecB     | 76.0                                                | 62.1  | 49.6  | 3.5                                                             | 2.9   | 2.3   |
|                 |              |                      | Complex with TF (Tig) | 85.4                                                | 72.2  | 55.7  | 4.8                                                             | 4.0   | 3.1   |
| P0AAQ2          | YajD         |                      | Monomer               | 154.0                                               | 130.1 | 100.5 | 18.5                                                            | 15.6  | 12.0  |
| P0ADA5          | YajG         | Cell membrane        | Monomer               | 129.1                                               | 109.1 | 84.2  | 12.6                                                            | 10.7  | 8.2   |
|                 |              |                      | Complex with SecB     | 72.9                                                | 59.5  | 47.6  | 3.2                                                             | 2.6   | 2.1   |
|                 |              |                      | Complex with TF (Tig) | 80.8                                                | 68.3  | 52.8  | 4.1                                                             | 3.5   | 2.7   |
| P46122          | YajI         | Cell membrane        | Monomer               | 132.6                                               | 112.0 | 86.5  | 13.4                                                            | 11.3  | 8.7   |
|                 |              |                      | Complex with SecB     | 73.3                                                | 59.9  | 47.9  | 3.2                                                             | 2.6   | 2.1   |
|                 |              |                      | Complex with TF (Tig) | 81.5                                                | 68.8  | 53.2  | 4.2                                                             | 3.6   | 2.8   |
| Q46948          | YajL         |                      | Monomer               | 129.5                                               | 109.4 | 84.5  | 12.7                                                            | 10.7  | 8.3   |
|                 |              |                      | Homodimer             | 98.7                                                | 80.6  | 64.4  | 6.8                                                             | 5.5   | 4.4   |
| P77735          | YajO         |                      | Monomer               | 103.9                                               | 87.8  | 67.8  | 7.7                                                             | 6.5   | 5.0   |
| P0A8E7          | YajQ         |                      | Monomer               | 136.0                                               | 114.9 | 88.7  | 14.1                                                            | 11.9  | 9.2   |
| P77726          | YajR         | Cell inner membrane  | Monomer               | 92.7                                                | 78.3  | 60.5  | 5.8                                                             | 4.9   | 3.8   |
|                 |              |                      | Complex with SecB     | 65.6                                                | 53.6  | 42.8  | 2.4                                                             | 2.0   | 1.6   |
|                 |              |                      | Complex with TF (Tig) | 70.8                                                | 59.8  | 46.2  | 2.9                                                             | 2.5   | 1.9   |
| P0AAQ6          | YbaA         |                      | Monomer               | 154.2                                               | 130.3 | 100.6 | 18.5                                                            | 15.6  | 12.1  |
| P0A8B5          | YbaB         |                      | Monomer               | 160.5                                               | 135.6 | 104.8 | 20.2                                                            | 17.0  | 13.2  |
|                 |              |                      | Homodimer             | 122.3                                               | 99.9  | 79.8  | 11.2                                                            | 9.1   | 7.3   |
| P46890          | YbaE         |                      | Monomer               | 82.8                                                | 70.0  | 54.1  | 4.4                                                             | 3.7   | 2.9   |
| P0AAR3          | YbaK         | Cytoplasm            | Monomer               | 139.8                                               | 118.1 | 91.2  | 15.0                                                            | 12.7  | 9.8   |

| UniProtKB A. N. | Protein name | Subcellular location | Subunit               | $D_0 \left( \frac{\mu\text{m}^2}{\text{s}} \right)$ |       |       | $D_{\text{cyto}} \left( \frac{\mu\text{m}^2}{\text{s}} \right)$ |       |       |
|-----------------|--------------|----------------------|-----------------------|-----------------------------------------------------|-------|-------|-----------------------------------------------------------------|-------|-------|
|                 |              |                      |                       | 310 K                                               | 303 K | 293 K | 310 K                                                           | 303 K | 293 K |
| P39830          | YbaL         | Cell inner membrane  | Monomer               | 85.8                                                | 72.5  | 56.0  | 4.8                                                             | 4.1   | 3.1   |
|                 |              |                      | Complex with SecB     | 63.4                                                | 51.8  | 41.4  | 2.2                                                             | 1.8   | 1.4   |
|                 |              |                      | Complex with TF (Tig) | 68.0                                                | 57.4  | 44.4  | 2.6                                                             | 2.2   | 1.7   |
| P45807          | YbaM         |                      | Monomer               | 210.4                                               | 177.8 | 137.3 | 34.8                                                            | 29.4  | 22.7  |
| P0AAR5          | YbaN         | Cell inner membrane  | Monomer               | 148.1                                               | 125.1 | 96.6  | 17.0                                                            | 14.4  | 11.1  |
|                 |              |                      | Complex with SecB     | 74.9                                                | 61.2  | 48.9  | 3.4                                                             | 2.8   | 2.2   |
|                 |              |                      | Complex with TF (Tig) | 83.9                                                | 70.9  | 54.7  | 4.6                                                             | 3.8   | 3.0   |
| P0ACJ5          | YbaO         |                      | Monomer               | 138.7                                               | 117.2 | 90.5  | 14.8                                                            | 12.5  | 9.6   |
| P77301          | YbaP         |                      | Monomer               | 112.3                                               | 94.9  | 73.3  | 9.2                                                             | 7.8   | 6.0   |
| P0A9T6          | YbaQ         |                      | Monomer               | 154.9                                               | 130.8 | 101.1 | 18.7                                                            | 15.8  | 12.2  |
| P77400          | YbaT         | Cell inner membrane  | Monomer               | 95.1                                                | 80.4  | 62.1  | 6.2                                                             | 5.3   | 4.1   |
|                 |              |                      | Complex with SecB     | 66.3                                                | 54.1  | 43.3  | 2.5                                                             | 2.0   | 1.6   |
|                 |              |                      | Complex with TF (Tig) | 71.7                                                | 60.6  | 46.8  | 3.0                                                             | 2.6   | 2.0   |
| P0AAR8          | YbaV         |                      | Monomer               | 157.1                                               | 132.7 | 102.5 | 19.3                                                            | 16.3  | 12.6  |
| P77717          | YbaY         | Cell membrane        | Monomer               | 133.0                                               | 112.3 | 86.8  | 13.5                                                            | 11.4  | 8.8   |
|                 |              |                      | Complex with SecB     | 73.4                                                | 59.9  | 47.9  | 3.2                                                             | 2.6   | 2.1   |
|                 |              |                      | Complex with TF (Tig) | 81.6                                                | 68.9  | 53.2  | 4.2                                                             | 3.6   | 2.8   |
| P0AFP2          | YbaZ         |                      | Monomer               | 149.3                                               | 126.2 | 97.4  | 17.3                                                            | 14.6  | 11.3  |
| P0A9T8          | YbbA         |                      | Monomer               | 121.4                                               | 102.5 | 79.2  | 11.0                                                            | 9.3   | 7.2   |
| P33668          | YbbC         |                      | Monomer               | 150.6                                               | 127.2 | 98.2  | 17.6                                                            | 14.9  | 11.5  |
| P33669          | YbbD         | Membrane             | Monomer               | 172.2                                               | 145.4 | 112.3 | 23.3                                                            | 19.7  | 15.2  |
|                 |              |                      | Complex with SecB     | 76.7                                                | 62.6  | 50.0  | 3.6                                                             | 3.0   | 2.4   |
|                 |              |                      | Complex with TF (Tig) | 86.5                                                | 73.0  | 56.4  | 4.9                                                             | 4.2   | 3.2   |
| P0AAS3          | YbbJ         | Cell inner membrane  | Monomer               | 140.3                                               | 118.5 | 91.6  | 15.1                                                            | 12.8  | 9.9   |
|                 |              |                      | Complex with SecB     | 74.2                                                | 60.6  | 48.4  | 3.3                                                             | 2.7   | 2.2   |
|                 |              |                      | Complex with TF (Tig) | 82.8                                                | 69.9  | 54.0  | 4.4                                                             | 3.7   | 2.9   |
| P77279          | YbbL         |                      | Monomer               | 119.7                                               | 101.2 | 78.1  | 10.7                                                            | 9.0   | 7.0   |
| P77307          | YbbM         | Cell inner membrane  | Monomer               | 115.0                                               | 97.1  | 75.0  | 9.7                                                             | 8.2   | 6.3   |
|                 |              |                      | Complex with SecB     | 70.7                                                | 57.8  | 46.1  | 2.9                                                             | 2.4   | 1.9   |
|                 |              |                      | Complex with TF (Tig) | 77.8                                                | 65.7  | 50.7  | 3.8                                                             | 3.2   | 2.5   |
| P77395          | YbbN         |                      | Monomer               | 109.6                                               | 92.6  | 71.5  | 8.7                                                             | 7.4   | 5.7   |

| UniProtKB A. N. | Protein name | Subcellular location | Subunit               | $D_0 \left( \frac{\mu\text{m}^2}{\text{s}} \right)$ |       |       | $D_{\text{cyto}} \left( \frac{\mu\text{m}^2}{\text{s}} \right)$ |       |       |
|-----------------|--------------|----------------------|-----------------------|-----------------------------------------------------|-------|-------|-----------------------------------------------------------------|-------|-------|
|                 |              |                      |                       | 310 K                                               | 303 K | 293 K | 310 K                                                           | 303 K | 293 K |
| P0AFP4          | YbbO         |                      | Monomer               | 113.0                                               | 95.5  | 73.8  | 9.3                                                             | 7.9   | 6.1   |
| P77504          | YbbP         | Cell membrane        | Monomer               | 73.1                                                | 61.8  | 47.7  | 3.2                                                             | 2.7   | 2.1   |
|                 |              |                      | Complex with SecB     | 58.4                                                | 47.7  | 38.1  | 1.7                                                             | 1.4   | 1.1   |
|                 |              |                      | Complex with TF (Tig) | 61.7                                                | 52.2  | 40.3  | 2.0                                                             | 1.7   | 1.3   |
| P75711          | YbbV         |                      | Monomer               | 167.1                                               | 141.2 | 109.1 | 21.9                                                            | 18.5  | 14.3  |
| P75712          | YbbW         | Cell inner membrane  | Monomer               | 90.1                                                | 76.1  | 58.8  | 5.4                                                             | 4.6   | 3.6   |
|                 |              |                      | Complex with SecB     | 64.8                                                | 52.9  | 42.3  | 2.3                                                             | 1.9   | 1.5   |
|                 |              |                      | Complex with TF (Tig) | 69.8                                                | 59.0  | 45.5  | 2.8                                                             | 2.4   | 1.8   |
| P77328          | YbbY         | Cell inner membrane  | Monomer               | 93.9                                                | 79.3  | 61.3  | 6.0                                                             | 5.1   | 3.9   |
|                 |              |                      | Complex with SecB     | 65.9                                                | 53.9  | 43.0  | 2.4                                                             | 2.0   | 1.6   |
|                 |              |                      | Complex with TF (Tig) | 71.3                                                | 60.2  | 46.5  | 3.0                                                             | 2.5   | 2.0   |
| P75717          | YbcC         |                      | Monomer               | 169.2                                               | 142.9 | 110.4 | 22.5                                                            | 19.0  | 14.7  |
| P77528          | YbcD         |                      | Monomer               | 183.9                                               | 155.4 | 120.0 | 26.6                                                            | 22.5  | 17.4  |
| P37325          | YbcH         |                      | Monomer               | 108.0                                               | 91.2  | 70.5  | 8.4                                                             | 7.1   | 5.5   |
| P45570          | YbcI         | Cell inner membrane  | Monomer               | 132.7                                               | 112.1 | 86.6  | 13.4                                                            | 11.3  | 8.7   |
|                 |              |                      | Complex with SecB     | 73.3                                                | 59.9  | 47.9  | 3.2                                                             | 2.6   | 2.1   |
|                 |              |                      | Complex with TF (Tig) | 81.5                                                | 68.9  | 53.2  | 4.2                                                             | 3.6   | 2.8   |
| P0AAS7          | YbcJ         |                      | Monomer               | 194.2                                               | 164.1 | 126.7 | 29.7                                                            | 25.1  | 19.4  |
| P77698          | YbcK         |                      | Monomer               | 86.9                                                | 73.4  | 56.7  | 5.0                                                             | 4.2   | 3.2   |
| P77368          | YbcL         | Periplasm            | Monomer               | 132.8                                               | 112.2 | 86.7  | 13.4                                                            | 11.3  | 8.8   |
|                 |              |                      | Complex with SecB     | 73.4                                                | 59.9  | 47.9  | 3.2                                                             | 2.6   | 2.1   |
|                 |              |                      | Complex with TF (Tig) | 81.5                                                | 68.9  | 53.2  | 4.2                                                             | 3.6   | 2.8   |
| P77634          | YbcM         |                      | Monomer               | 110.9                                               | 93.7  | 72.4  | 8.9                                                             | 7.6   | 5.8   |
| Q47269          | YbcN         |                      | Monomer               | 138.7                                               | 117.2 | 90.5  | 14.8                                                            | 12.5  | 9.6   |
| P68661          | YbcO         |                      | Monomer               | 170.2                                               | 143.8 | 111.1 | 22.8                                                            | 19.2  | 14.8  |
| P77598          | YbcV         |                      | Monomer               | 142.1                                               | 120.0 | 92.7  | 15.5                                                            | 13.1  | 10.1  |
| P64435          | YbcW         |                      | Monomer               | 191.9                                               | 162.1 | 125.2 | 29.0                                                            | 24.5  | 18.9  |
| P77460          | YbcY         |                      | Monomer               | 128.7                                               | 108.7 | 84.0  | 12.5                                                            | 10.6  | 8.2   |
| P0A8Y8          | YbdB         |                      | Monomer               | 147.3                                               | 124.4 | 96.1  | 16.8                                                            | 14.2  | 11.0  |
| P0AAS9          | YbdD         |                      | Monomer               | 193.4                                               | 163.4 | 126.2 | 29.5                                                            | 24.9  | 19.2  |
| P0AAT2          | YbdF         |                      | Monomer               | 151.0                                               | 127.6 | 98.5  | 17.7                                                            | 15.0  | 11.6  |

| UniProtKB A. N. | Protein name | Subcellular location | Subunit               | $D_0 \left( \frac{\mu\text{m}^2}{\text{s}} \right)$ |       |       | $D_{\text{cyto}} \left( \frac{\mu\text{m}^2}{\text{s}} \right)$ |       |       |
|-----------------|--------------|----------------------|-----------------------|-----------------------------------------------------|-------|-------|-----------------------------------------------------------------|-------|-------|
|                 |              |                      |                       | 310 K                                               | 303 K | 293 K | 310 K                                                           | 303 K | 293 K |
| P45579          | YbdH         |                      | Monomer               | 101.1                                               | 85.4  | 66.0  | 7.2                                                             | 6.1   | 4.7   |
| P77506          | YbdJ         | Cell membrane        | Monomer               | 176.7                                               | 149.3 | 115.3 | 24.6                                                            | 20.8  | 16.0  |
|                 |              |                      | Complex with SecB     | 76.9                                                | 62.8  | 50.2  | 3.7                                                             | 3.0   | 2.4   |
|                 |              |                      | Complex with TF (Tig) | 86.8                                                | 73.4  | 56.7  | 5.0                                                             | 4.2   | 3.2   |
| P77213          | YbdK         |                      | Monomer               | 98.6                                                | 83.3  | 64.3  | 6.8                                                             | 5.7   | 4.4   |
|                 |              |                      | Homodimer             | 75.1                                                | 61.4  | 49.0  | 3.4                                                             | 2.8   | 2.2   |
| P77806          | YbdL         | Cytoplasm            | Monomer               | 97.4                                                | 82.3  | 63.6  | 6.6                                                             | 5.6   | 4.3   |
|                 |              |                      | Homodimer             | 74.2                                                | 60.7  | 48.4  | 3.3                                                             | 2.7   | 2.2   |
| P77174          | YbdM         |                      | Monomer               | 122.5                                               | 103.5 | 79.9  | 11.2                                                            | 9.5   | 7.3   |
| P77216          | YbdN         |                      | Monomer               | 93.4                                                | 78.9  | 61.0  | 5.9                                                             | 5.0   | 3.9   |
| P77746          | YbdO         |                      | Monomer               | 106.3                                               | 89.8  | 69.4  | 8.1                                                             | 6.8   | 5.3   |
| P77316          | YbdR         |                      | Monomer               | 96.4                                                | 81.4  | 62.9  | 6.4                                                             | 5.4   | 4.2   |
| P18393          | YbdZ         |                      | Monomer               | 185.8                                               | 157.0 | 121.3 | 27.2                                                            | 23.0  | 17.7  |
| P0AAT6          | YbeB         | Cytoplasm            | Monomer               | 162.9                                               | 137.6 | 106.3 | 20.8                                                            | 17.5  | 13.6  |
| P0A8J4          | YbeD         |                      | Monomer               | 173.7                                               | 146.7 | 113.3 | 23.7                                                            | 20.0  | 15.5  |
| P30979          | YbeF         |                      | Monomer               | 104.5                                               | 88.2  | 68.2  | 7.8                                                             | 6.6   | 5.1   |
| P0AAT9          | YbeL         |                      | Monomer               | 134.7                                               | 113.8 | 87.9  | 13.9                                                            | 11.7  | 9.0   |
| P39874          | YbeM         |                      | Monomer               | 114.2                                               | 96.5  | 74.5  | 9.6                                                             | 8.1   | 6.2   |
| P77234          | YbeQ         |                      | Monomer               | 103.3                                               | 87.2  | 67.4  | 7.6                                                             | 6.4   | 4.9   |
| P77627          | YbeR         |                      | Monomer               | 115.7                                               | 97.7  | 75.5  | 9.8                                                             | 8.3   | 6.4   |
| P77296          | YbeT         |                      | Monomer               | 129.2                                               | 109.1 | 84.3  | 12.6                                                            | 10.7  | 8.2   |
| P77427          | YbeU         |                      | Monomer               | 116.8                                               | 98.7  | 76.2  | 10.1                                                            | 8.5   | 6.6   |
| P0A898          | YbeY         | Cytoplasm            | Monomer               | 138.5                                               | 117.0 | 90.3  | 14.7                                                            | 12.4  | 9.6   |
| P0A9K3          | YbeZ         | Cytoplasm            | Monomer               | 101.1                                               | 85.5  | 66.0  | 7.2                                                             | 6.1   | 4.7   |
| P0AAU2          | YbfA         |                      | Monomer               | 185.8                                               | 157.0 | 121.3 | 27.2                                                            | 23.0  | 17.7  |
|                 |              |                      | Monomer               | 157.8                                               | 133.3 | 103.0 | 19.4                                                            | 16.4  | 12.7  |
| P0AAU5          | YbfB         | Cell membrane        | Complex with SecB     | 75.7                                                | 61.9  | 49.4  | 3.5                                                             | 2.9   | 2.3   |
|                 |              |                      | Complex with TF (Tig) | 85.1                                                | 71.9  | 55.5  | 4.7                                                             | 4.0   | 3.1   |
| P28915          | YbfC         |                      | Monomer               | 126.7                                               | 107.1 | 82.7  | 12.1                                                            | 10.2  | 7.9   |
| P28916          | YbfD         |                      | Monomer               | 113.9                                               | 96.2  | 74.3  | 9.5                                                             | 8.0   | 6.2   |
| P0AAU7          | YbfE         |                      | Monomer               | 164.6                                               | 139.0 | 107.4 | 21.2                                                            | 17.9  | 13.8  |

| UniProtKB A. N. | Protein name | Subcellular location | Subunit               | $D_0 \left( \frac{\mu\text{m}^2}{\text{s}} \right)$ |       |       | $D_{\text{cyto}} \left( \frac{\mu\text{m}^2}{\text{s}} \right)$ |       |       |
|-----------------|--------------|----------------------|-----------------------|-----------------------------------------------------|-------|-------|-----------------------------------------------------------------|-------|-------|
|                 |              |                      |                       | 310 K                                               | 303 K | 293 K | 310 K                                                           | 303 K | 293 K |
| P75736          | YbfF         |                      | Monomer               | 114.5                                               | 96.8  | 74.7  | 9.6                                                             | 8.1   | 6.3   |
| P37003          | YbfG         |                      | Monomer               | 121.2                                               | 102.4 | 79.1  | 11.0                                                            | 9.3   | 7.1   |
| P39901          | YbfI         |                      | Monomer               | 190.0                                               | 160.5 | 124.0 | 28.4                                                            | 24.0  | 18.5  |
| P46121          | YbfK         |                      | Monomer               | 176.0                                               | 148.7 | 114.9 | 24.4                                                            | 20.6  | 15.9  |
| P75741          | YbfL         |                      | Monomer               | 97.2                                                | 82.2  | 63.5  | 6.6                                                             | 5.5   | 4.3   |
| P75733          | YbfM         |                      | Monomer               | 89.9                                                | 75.9  | 58.6  | 5.4                                                             | 4.6   | 3.5   |
| P75734          | YbfN         | Cell membrane        | Monomer               | 160.6                                               | 135.7 | 104.8 | 20.2                                                            | 17.0  | 13.2  |
|                 |              |                      | Complex with SecB     | 75.9                                                | 62.0  | 49.6  | 3.5                                                             | 2.9   | 2.3   |
|                 |              |                      | Complex with TF (Tig) | 85.4                                                | 72.1  | 55.7  | 4.8                                                             | 4.0   | 3.1   |
| P77779          | YbfO         |                      | Monomer               | 88.3                                                | 74.6  | 57.6  | 5.2                                                             | 4.4   | 3.4   |
| P75737          | YbfP         | Cell membrane        | Monomer               | 136.2                                               | 115.0 | 88.9  | 14.2                                                            | 12.0  | 9.3   |
|                 |              |                      | Complex with SecB     | 73.8                                                | 60.3  | 48.1  | 3.3                                                             | 2.7   | 2.1   |
|                 |              |                      | Complex with TF (Tig) | 82.1                                                | 69.4  | 53.6  | 4.3                                                             | 3.6   | 2.8   |
| Q2EEQ8          | YbfQ         |                      | Monomer               | 175.6                                               | 148.4 | 114.6 | 24.3                                                            | 20.5  | 15.8  |
| P24252          | YbgA         |                      | Monomer               | 130.9                                               | 110.6 | 85.4  | 13.0                                                            | 11.0  | 8.5   |
| P0A8Z3          | YbgC         | Cell inner membrane  | Monomer               | 145.1                                               | 122.5 | 94.7  | 16.3                                                            | 13.7  | 10.6  |
| P37909          | YbgD         | Fimbrium             | Monomer               | 131.9                                               | 111.4 | 86.1  | 13.2                                                            | 11.2  | 8.6   |
|                 |              |                      | Complex with SecB     | 73.2                                                | 59.8  | 47.8  | 3.2                                                             | 2.6   | 2.1   |
|                 |              |                      | Complex with TF (Tig) | 81.4                                                | 68.7  | 53.1  | 4.2                                                             | 3.6   | 2.8   |
| P0AAV0          | YbgE         |                      | Monomer               | 166.6                                               | 140.7 | 108.7 | 21.8                                                            | 18.4  | 14.2  |
| P45955          | YbgF         |                      | Monomer               | 114.9                                               | 97.0  | 74.9  | 9.7                                                             | 8.2   | 6.3   |
| P0AFP6          | YbgI         |                      | Monomer               | 117.1                                               | 98.9  | 76.4  | 10.1                                                            | 8.6   | 6.6   |
|                 |              |                      | Homohexamer           | 58.0                                                | 47.4  | 37.8  | 1.7                                                             | 1.4   | 1.1   |
| P0AAV4          | YbgJ         |                      | Monomer               | 122.5                                               | 103.5 | 79.9  | 11.2                                                            | 9.5   | 7.3   |
| P75745          | YbgK         |                      | Monomer               | 106.3                                               | 89.8  | 69.4  | 8.1                                                             | 6.8   | 5.3   |
| P75746          | YbgL         |                      | Monomer               | 119.0                                               | 100.5 | 77.6  | 10.5                                                            | 8.9   | 6.9   |
| P75748          | YbgO         |                      | Monomer               | 100.6                                               | 85.0  | 65.7  | 7.1                                                             | 6.0   | 4.6   |
| P75749          | YbgP         | Periplasm            | Monomer               | 117.0                                               | 98.8  | 76.3  | 10.1                                                            | 8.5   | 6.6   |
|                 |              |                      | Complex with SecB     | 71.1                                                | 58.1  | 46.4  | 3.0                                                             | 2.4   | 1.9   |
|                 |              |                      | Complex with TF (Tig) | 78.2                                                | 66.1  | 51.1  | 3.8                                                             | 3.2   | 2.5   |
| P75750          | YbgQ         | Cell outer membrane  | Monomer               | 72.9                                                | 61.6  | 47.5  | 3.2                                                             | 2.7   | 2.1   |

| UniProtKB A. N. | Protein name | Subcellular location | Subunit               | $D_0 \left( \frac{\mu\text{m}^2}{\text{s}} \right)$ |       |       | $D_{\text{cyto}} \left( \frac{\mu\text{m}^2}{\text{s}} \right)$ |       |       |
|-----------------|--------------|----------------------|-----------------------|-----------------------------------------------------|-------|-------|-----------------------------------------------------------------|-------|-------|
|                 |              |                      |                       | 310 K                                               | 303 K | 293 K | 310 K                                                           | 303 K | 293 K |
|                 |              |                      | Complex with SecB     | 58.3                                                | 47.6  | 38.0  | 1.7                                                             | 1.4   | 1.1   |
|                 |              |                      | Complex with TF (Tig) | 61.6                                                | 52.0  | 40.2  | 2.0                                                             | 1.7   | 1.3   |
| P0AAV6          | YbgS         |                      | Monomer               | 156.3                                               | 132.0 | 102.0 | 19.0                                                            | 16.1  | 12.4  |
|                 |              |                      | Monomer               | 246.1                                               | 207.9 | 160.6 | 46.8                                                            | 39.6  | 30.6  |
| P56100          | YbgT         | Membrane             | Complex with SecB     | 79.1                                                | 64.6  | 51.6  | 3.9                                                             | 3.2   | 2.6   |
|                 |              |                      | Complex with TF (Tig) | 90.2                                                | 76.2  | 58.9  | 5.5                                                             | 4.6   | 3.6   |
| P21829          | YbhA         |                      | Monomer               | 111.9                                               | 94.5  | 73.0  | 9.1                                                             | 7.7   | 5.9   |
|                 |              |                      | Monomer               | 139.8                                               | 118.1 | 91.3  | 15.0                                                            | 12.7  | 9.8   |
| P12994          | YbhB         | Cytoplasm            | Homodimer             | 106.6                                               | 87.1  | 69.5  | 8.1                                                             | 6.7   | 5.3   |
|                 |              |                      | Monomer               | 94.8                                                | 80.1  | 61.9  | 6.2                                                             | 5.2   | 4.0   |
| P46130          | YbhC         | Cell outer membrane  | Complex with SecB     | 66.2                                                | 54.1  | 43.2  | 2.5                                                             | 2.0   | 1.6   |
|                 |              |                      | Complex with TF (Tig) | 71.6                                                | 60.5  | 46.7  | 3.0                                                             | 2.6   | 2.0   |
| P52696          | YbhD         |                      | Monomer               | 104.3                                               | 88.2  | 68.1  | 7.8                                                             | 6.6   | 5.1   |
| P0A9U1          | YbhF         |                      | Monomer               | 83.8                                                | 70.8  | 54.7  | 4.5                                                             | 3.8   | 3.0   |
|                 |              |                      | Monomer               | 103.9                                               | 87.8  | 67.8  | 7.7                                                             | 6.5   | 5.0   |
| P75777          | YbhG         | Periplasm            | Complex with SecB     | 68.5                                                | 56.0  | 44.7  | 2.7                                                             | 2.2   | 1.8   |
|                 |              |                      | Complex with TF (Tig) | 74.7                                                | 63.1  | 48.7  | 3.4                                                             | 2.9   | 2.2   |
| P0AAV8          | YbhH         |                      | Monomer               | 103.2                                               | 87.2  | 67.4  | 7.6                                                             | 6.4   | 4.9   |
|                 |              |                      | Monomer               | 90.8                                                | 76.7  | 59.3  | 5.6                                                             | 4.7   | 3.6   |
| P75763          | YbhI         | Cell inner membrane  | Complex with SecB     | 65.0                                                | 53.1  | 42.4  | 2.3                                                             | 1.9   | 1.5   |
|                 |              |                      | Complex with TF (Tig) | 70.1                                                | 59.2  | 45.7  | 2.9                                                             | 2.4   | 1.9   |
| P75764          | YbhJ         |                      | Monomer               | 75.8                                                | 64.0  | 49.5  | 3.5                                                             | 3.0   | 2.3   |
| P75767          | YbhK         |                      | Monomer               | 108.3                                               | 91.5  | 70.7  | 8.5                                                             | 7.1   | 5.5   |
|                 |              |                      | Monomer               | 118.8                                               | 100.4 | 77.5  | 10.5                                                            | 8.8   | 6.8   |
| P0AAC4          | YbhL         | Cell inner membrane  | Complex with SecB     | 71.4                                                | 58.3  | 46.6  | 3.0                                                             | 2.5   | 2.0   |
|                 |              |                      | Complex with TF (Tig) | 78.7                                                | 66.5  | 51.3  | 3.9                                                             | 3.3   | 2.5   |
|                 |              |                      | Monomer               | 118.4                                               | 100.0 | 77.3  | 10.4                                                            | 8.8   | 6.8   |
| P75769          | YbhM         | Cell membrane        | Complex with SecB     | 71.3                                                | 58.3  | 46.5  | 3.0                                                             | 2.4   | 2.0   |
|                 |              |                      | Complex with TF (Tig) | 78.6                                                | 66.4  | 51.3  | 3.9                                                             | 3.3   | 2.5   |
|                 |              |                      | Monomer               | 104.6                                               | 88.3  | 68.2  | 7.8                                                             | 6.6   | 5.1   |
| P75770          | YbhN         | Cell inner membrane  | Complex with SecB     | 68.6                                                | 56.1  | 44.8  | 2.7                                                             | 2.2   | 1.8   |

| UniProtKB A. N. | Protein name | Subcellular location | Subunit               | $D_0 \left( \frac{\mu\text{m}^2}{\text{s}} \right)$ |       |       | $D_{\text{cyto}} \left( \frac{\mu\text{m}^2}{\text{s}} \right)$ |       |       |
|-----------------|--------------|----------------------|-----------------------|-----------------------------------------------------|-------|-------|-----------------------------------------------------------------|-------|-------|
|                 |              |                      |                       | 310 K                                               | 303 K | 293 K | 310 K                                                           | 303 K | 293 K |
|                 |              |                      | Complex with TF (Tig) | 74.9                                                | 63.3  | 48.9  | 3.4                                                             | 2.9   | 2.2   |
|                 |              |                      | Monomer               | 93.6                                                | 79.0  | 61.1  | 6.0                                                             | 5.0   | 3.9   |
| P0AA84          | YbhO         | Cell membrane        | Complex with SecB     | 65.8                                                | 53.8  | 43.0  | 2.4                                                             | 2.0   | 1.6   |
|                 |              |                      | Complex with TF (Tig) | 71.1                                                | 60.1  | 46.4  | 3.0                                                             | 2.5   | 1.9   |
| P0AAW1          | YbhP         |                      | Monomer               | 114.0                                               | 96.3  | 74.4  | 9.5                                                             | 8.0   | 6.2   |
|                 |              |                      | Monomer               | 145.4                                               | 122.8 | 94.9  | 16.3                                                            | 13.8  | 10.7  |
| P0AAW5          | YbhQ         | Cell inner membrane  | Complex with SecB     | 74.7                                                | 61.0  | 48.7  | 3.4                                                             | 2.8   | 2.2   |
|                 |              |                      | Complex with TF (Tig) | 83.5                                                | 70.5  | 54.5  | 4.5                                                             | 3.8   | 2.9   |
|                 |              |                      | Monomer               | 98.7                                                | 83.4  | 64.4  | 6.8                                                             | 5.7   | 4.4   |
| P0AFP9          | YbhR         | Cell inner membrane  | Complex with SecB     | 67.2                                                | 54.9  | 43.9  | 2.6                                                             | 2.1   | 1.7   |
|                 |              |                      | Complex with TF (Tig) | 73.0                                                | 61.7  | 47.6  | 3.2                                                             | 2.7   | 2.1   |
|                 |              |                      | Monomer               | 98.2                                                | 83.0  | 64.1  | 6.7                                                             | 5.7   | 4.4   |
| P0AFQ2          | YbhS         | Cell inner membrane  | Complex with SecB     | 67.1                                                | 54.8  | 43.8  | 2.5                                                             | 2.1   | 1.7   |
|                 |              |                      | Complex with TF (Tig) | 72.8                                                | 61.5  | 47.5  | 3.2                                                             | 2.7   | 2.1   |
|                 |              |                      | Monomer               | 221.3                                               | 186.9 | 144.4 | 38.3                                                            | 32.4  | 25.0  |
| P0AAW9          | YbhT         | Membrane             | Complex with SecB     | 78.6                                                | 64.2  | 51.3  | 3.9                                                             | 3.1   | 2.5   |
|                 |              |                      | Complex with TF (Tig) | 89.4                                                | 75.5  | 58.3  | 5.3                                                             | 4.5   | 3.5   |
| P30176          | YbiA         |                      | Monomer               | 135.1                                               | 114.1 | 88.1  | 13.9                                                            | 11.8  | 9.1   |
| P30177          | YbiB         |                      | Monomer               | 105.5                                               | 89.1  | 68.9  | 8.0                                                             | 6.7   | 5.2   |
| P30178          | YbiC         | Cytoplasm            | Monomer               | 101.3                                               | 85.6  | 66.1  | 7.2                                                             | 6.1   | 4.7   |
| P0ACU0          | YbiH         |                      | Monomer               | 120.4                                               | 101.7 | 78.6  | 10.8                                                            | 9.1   | 7.0   |
| P41039          | YbiI         |                      | Monomer               | 174.2                                               | 147.2 | 113.7 | 23.9                                                            | 20.2  | 15.6  |
|                 |              |                      | Monomer               | 183.3                                               | 154.8 | 119.6 | 26.4                                                            | 22.3  | 17.3  |
| P0AAX3          | YbiJ         | Periplasm            | Complex with SecB     | 77.2                                                | 63.1  | 50.4  | 3.7                                                             | 3.0   | 2.4   |
|                 |              |                      | Complex with TF (Tig) | 87.3                                                | 73.8  | 57.0  | 5.0                                                             | 4.3   | 3.3   |
|                 |              |                      | Monomer               | 75.7                                                | 63.9  | 49.4  | 3.5                                                             | 3.0   | 2.3   |
| P75783          | YbiO         | Cell membrane        | Complex with SecB     | 59.5                                                | 48.6  | 38.8  | 1.8                                                             | 1.5   | 1.2   |
|                 |              |                      | Complex with TF (Tig) | 63.1                                                | 53.3  | 41.2  | 2.2                                                             | 1.8   | 1.4   |
|                 |              |                      | Monomer               | 85.6                                                | 72.3  | 55.9  | 4.8                                                             | 4.1   | 3.1   |
| P75785          | YbiP         | Cell inner membrane  | Complex with SecB     | 63.3                                                | 51.8  | 41.3  | 2.2                                                             | 1.8   | 1.4   |
|                 |              |                      | Complex with TF (Tig) | 67.9                                                | 57.4  | 44.3  | 2.6                                                             | 2.2   | 1.7   |

| UniProtKB A. N. | Protein name | Subcellular location | Subunit               | $D_0 \left( \frac{\mu\text{m}^2}{\text{s}} \right)$ |       |       | $D_{\text{cyto}} \left( \frac{\mu\text{m}^2}{\text{s}} \right)$ |       |       |
|-----------------|--------------|----------------------|-----------------------|-----------------------------------------------------|-------|-------|-----------------------------------------------------------------|-------|-------|
|                 |              |                      |                       | 310 K                                               | 303 K | 293 K | 310 K                                                           | 303 K | 293 K |
| P75788          | YbiR         | Cell inner membrane  | Monomer               | 99.1                                                | 83.7  | 64.6  | 6.9                                                             | 5.8   | 4.5   |
|                 |              |                      | Complex with SecB     | 67.3                                                | 55.0  | 43.9  | 2.6                                                             | 2.1   | 1.7   |
|                 |              |                      | Complex with TF (Tig) | 73.1                                                | 61.8  | 47.7  | 3.2                                                             | 2.7   | 2.1   |
| P0AAX8          | YbiS         | Periplasm            | Monomer               | 107.6                                               | 90.9  | 70.2  | 8.3                                                             | 7.0   | 5.4   |
|                 |              |                      | Complex with SecB     | 69.3                                                | 56.6  | 45.2  | 2.8                                                             | 2.3   | 1.8   |
|                 |              |                      | Complex with TF (Tig) | 75.8                                                | 64.0  | 49.5  | 3.5                                                             | 3.0   | 2.3   |
| P0A9U3          | YbiT         |                      | Monomer               | 85.5                                                | 72.3  | 55.8  | 4.8                                                             | 4.0   | 3.1   |
| P75791          | YbiU         |                      | Monomer               | 93.8                                                | 79.2  | 61.2  | 6.0                                                             | 5.1   | 3.9   |
| P75793          | YbiW         | Cytoplasm            | Monomer               | 72.9                                                | 61.6  | 47.5  | 3.2                                                             | 2.7   | 2.1   |
| P75779          | YbiX         |                      | Monomer               | 119.5                                               | 100.9 | 78.0  | 10.6                                                            | 9.0   | 6.9   |
| P75794          | YbiY         | Cytoplasm            | Monomer               | 108.0                                               | 91.2  | 70.5  | 8.4                                                             | 7.1   | 5.5   |
| P46119          | YbjC         |                      | Monomer               | 169.1                                               | 142.9 | 110.4 | 22.4                                                            | 19.0  | 14.6  |
| P75828          | YbjD         |                      | Monomer               | 83.5                                                | 70.6  | 54.5  | 4.5                                                             | 3.8   | 2.9   |
| P75826          | YbjE         | Cell membrane        | Monomer               | 108.9                                               | 92.0  | 71.1  | 8.6                                                             | 7.2   | 5.6   |
|                 |              |                      | Complex with SecB     | 69.6                                                | 56.8  | 45.4  | 2.8                                                             | 2.3   | 1.8   |
|                 |              |                      | Complex with TF (Tig) | 76.2                                                | 64.3  | 49.7  | 3.6                                                             | 3.0   | 2.3   |
| P75806          | YbjG         | Cell inner membrane  | Monomer               | 125.8                                               | 106.2 | 82.1  | 11.9                                                            | 10.1  | 7.8   |
|                 |              |                      | Complex with SecB     | 72.4                                                | 59.2  | 47.3  | 3.1                                                             | 2.6   | 2.0   |
|                 |              |                      | Complex with TF (Tig) | 80.2                                                | 67.7  | 52.3  | 4.1                                                             | 3.4   | 2.7   |
| P0AAY4          | YbjH         |                      | Monomer               | 172.7                                               | 145.9 | 112.7 | 23.4                                                            | 19.8  | 15.3  |
| P75809          | YbjI         |                      | Monomer               | 111.9                                               | 94.5  | 73.0  | 9.1                                                             | 7.7   | 6.0   |
| P75810          | YbjJ         | Cell inner membrane  | Monomer               | 98.4                                                | 83.2  | 64.2  | 6.7                                                             | 5.7   | 4.4   |
|                 |              |                      | Complex with SecB     | 67.2                                                | 54.9  | 43.8  | 2.6                                                             | 2.1   | 1.7   |
|                 |              |                      | Complex with TF (Tig) | 72.9                                                | 61.6  | 47.6  | 3.2                                                             | 2.7   | 2.1   |
| P75811          | YbjK         |                      | Monomer               | 130.7                                               | 110.4 | 85.3  | 13.0                                                            | 10.9  | 8.5   |
| P60869          | YbjL         | Cell membrane        | Monomer               | 85.3                                                | 72.0  | 55.6  | 4.7                                                             | 4.0   | 3.1   |
|                 |              |                      | Complex with SecB     | 63.2                                                | 51.6  | 41.3  | 2.2                                                             | 1.8   | 1.4   |
|                 |              |                      | Complex with TF (Tig) | 67.7                                                | 57.2  | 44.2  | 2.6                                                             | 2.2   | 1.7   |
| P64439          | YbjM         | Cell inner membrane  | Monomer               | 150.3                                               | 127.0 | 98.1  | 17.6                                                            | 14.8  | 11.5  |
|                 |              |                      | Complex with SecB     | 75.1                                                | 61.4  | 49.0  | 3.4                                                             | 2.8   | 2.2   |
|                 |              |                      | Complex with TF (Tig) | 84.2                                                | 71.1  | 54.9  | 4.6                                                             | 3.9   | 3.0   |



| UniProtKB A. N. | Protein name | Subcellular location | Subunit               | $D_0 \left( \frac{\mu\text{m}^2}{\text{s}} \right)$ |       |       | $D_{\text{cyto}} \left( \frac{\mu\text{m}^2}{\text{s}} \right)$ |       |       |
|-----------------|--------------|----------------------|-----------------------|-----------------------------------------------------|-------|-------|-----------------------------------------------------------------|-------|-------|
|                 |              |                      |                       | 310 K                                               | 303 K | 293 K | 310 K                                                           | 303 K | 293 K |
| P0AAY6          | YbjN         |                      | Monomer               | 138.0                                               | 116.6 | 90.1  | 14.6                                                            | 12.3  | 9.5   |
|                 |              |                      | Monomer               | 135.5                                               | 114.5 | 88.4  | 14.0                                                            | 11.9  | 9.2   |
| P0AAZ0          | YbjO         | Cell inner membrane  | Complex with SecB     | 73.7                                                | 60.2  | 48.1  | 3.3                                                             | 2.7   | 2.1   |
|                 |              |                      | Complex with TF (Tig) | 82.0                                                | 69.3  | 53.5  | 4.3                                                             | 3.6   | 2.8   |
|                 |              |                      | Monomer               | 134.2                                               | 113.3 | 87.6  | 13.7                                                            | 11.6  | 9.0   |
| P75818          | YbjP         | Cell membrane        | Complex with SecB     | 73.5                                                | 60.1  | 48.0  | 3.2                                                             | 2.7   | 2.1   |
|                 |              |                      | Complex with TF (Tig) | 81.8                                                | 69.1  | 53.4  | 4.3                                                             | 3.6   | 2.8   |
| P0A8C1          | YbjQ         |                      | Monomer               | 163.7                                               | 138.3 | 106.8 | 21.0                                                            | 17.7  | 13.7  |
| P75821          | YbjS         |                      | Monomer               | 102.1                                               | 86.3  | 66.6  | 7.4                                                             | 6.2   | 4.8   |
| P75822          | YbjT         |                      | Monomer               | 89.3                                                | 75.4  | 58.2  | 5.3                                                             | 4.5   | 3.5   |
| P75829          | YbjX         |                      | Monomer               | 101.9                                               | 86.0  | 66.5  | 7.3                                                             | 6.2   | 4.8   |
|                 |              |                      | Monomer               | 124.3                                               | 105.0 | 81.1  | 11.6                                                            | 9.8   | 7.6   |
| P21367          | YcaC         |                      | Homooctamer           | 55.0                                                | 44.9  | 35.9  | 1.5                                                             | 1.2   | 1.0   |
|                 |              |                      | Monomer               | 98.8                                                | 83.5  | 64.5  | 6.8                                                             | 5.8   | 4.4   |
| P21503          | YcaD         | Cell inner membrane  | Complex with SecB     | 67.3                                                | 54.9  | 43.9  | 2.6                                                             | 2.1   | 1.7   |
|                 |              |                      | Complex with TF (Tig) | 73.0                                                | 61.7  | 47.7  | 3.2                                                             | 2.7   | 2.1   |
|                 |              |                      | Monomer               | 74.7                                                | 63.1  | 48.8  | 3.4                                                             | 2.9   | 2.2   |
| P37443          | YcaI         | Cell membrane        | Complex with SecB     | 59.1                                                | 48.3  | 38.6  | 1.8                                                             | 1.5   | 1.2   |
|                 |              |                      | Complex with TF (Tig) | 62.6                                                | 52.9  | 40.9  | 2.1                                                             | 1.8   | 1.4   |
| P43340          | YcaK         |                      | Monomer               | 124.4                                               | 105.1 | 81.2  | 11.6                                                            | 9.8   | 7.6   |
| P43674          | YcaL         |                      | Monomer               | 117.3                                               | 99.1  | 76.6  | 10.2                                                            | 8.6   | 6.6   |
|                 |              |                      | Monomer               | 90.1                                                | 76.1  | 58.8  | 5.4                                                             | 4.6   | 3.5   |
| P75835          | YcaM         | Cell inner membrane  | Complex with SecB     | 64.8                                                | 52.9  | 42.3  | 2.3                                                             | 1.9   | 1.5   |
|                 |              |                      | Complex with TF (Tig) | 69.8                                                | 58.9  | 45.5  | 2.8                                                             | 2.4   | 1.8   |
| P75836          | YcaN         |                      | Monomer               | 106.4                                               | 89.9  | 69.4  | 8.1                                                             | 6.9   | 5.3   |
| P75838          | YcaO         |                      | Monomer               | 82.5                                                | 69.7  | 53.8  | 4.4                                                             | 3.7   | 2.9   |
|                 |              |                      | Monomer               | 118.1                                               | 99.8  | 77.1  | 10.3                                                            | 8.7   | 6.7   |
| P75839          | YcaP         | Cell membrane        | Complex with SecB     | 71.3                                                | 58.2  | 46.5  | 3.0                                                             | 2.4   | 2.0   |
|                 |              |                      | Complex with TF (Tig) | 78.5                                                | 66.3  | 51.2  | 3.9                                                             | 3.3   | 2.5   |
| P75843          | YcaQ         |                      | Monomer               | 93.5                                                | 79.0  | 61.0  | 6.0                                                             | 5.0   | 3.9   |
| P0AAZ7          | YcaR         |                      | Monomer               | 200.0                                               | 169.0 | 130.5 | 31.5                                                            | 26.6  | 20.5  |

| UniProtKB A. N. | Protein name | Subcellular location | Subunit               | $D_0 \left( \frac{\mu\text{m}^2}{\text{s}} \right)$ |       |       | $D_{\text{cyto}} \left( \frac{\mu\text{m}^2}{\text{s}} \right)$ |       |       |
|-----------------|--------------|----------------------|-----------------------|-----------------------------------------------------|-------|-------|-----------------------------------------------------------------|-------|-------|
|                 |              |                      |                       | 310 K                                               | 303 K | 293 K | 310 K                                                           | 303 K | 293 K |
| P22525          | YcbB         | Membrane             | Monomer               | 81.5                                                | 68.8  | 53.2  | 4.2                                                             | 3.6   | 2.8   |
|                 |              |                      | Complex with SecB     | 61.8                                                | 50.5  | 40.4  | 2.0                                                             | 1.7   | 1.3   |
|                 |              |                      | Complex with TF (Tig) | 66.0                                                | 55.8  | 43.1  | 2.4                                                             | 2.1   | 1.6   |
| P0AB01          | YcbC         |                      | Monomer               | 114.2                                               | 96.5  | 74.5  | 9.6                                                             | 8.1   | 6.2   |
| P40876          | YcbF         | Periplasm            | Monomer               | 118.9                                               | 100.4 | 77.6  | 10.5                                                            | 8.9   | 6.8   |
|                 |              |                      | Complex with SecB     | 71.4                                                | 58.3  | 46.6  | 3.0                                                             | 2.5   | 2.0   |
|                 |              |                      | Complex with TF (Tig) | 78.7                                                | 66.5  | 51.4  | 3.9                                                             | 3.3   | 2.5   |
| P0A8N0          | YcbG         |                      | Monomer               | 137.9                                               | 116.5 | 90.0  | 14.6                                                            | 12.3  | 9.5   |
| P0AB03          | YcbJ         |                      | Monomer               | 106.2                                               | 89.7  | 69.3  | 8.1                                                             | 6.8   | 5.3   |
| P0AB06          | YcbK         |                      | Monomer               | 130.6                                               | 110.3 | 85.2  | 12.9                                                            | 10.9  | 8.4   |
| P75849          | YcbL         |                      | Monomer               | 122.8                                               | 103.8 | 80.2  | 11.3                                                            | 9.5   | 7.4   |
| P75855          | YcbQ         | Fimbrium             | Monomer               | 135.0                                               | 114.1 | 88.1  | 13.9                                                            | 11.8  | 9.1   |
|                 |              |                      | Complex with SecB     | 73.6                                                | 60.1  | 48.0  | 3.3                                                             | 2.7   | 2.1   |
|                 |              |                      | Complex with TF (Tig) | 81.9                                                | 69.2  | 53.5  | 4.3                                                             | 3.6   | 2.8   |
| P75856          | YcbR         | Periplasm            | Monomer               | 119.7                                               | 101.2 | 78.1  | 10.7                                                            | 9.0   | 7.0   |
|                 |              |                      | Complex with SecB     | 71.5                                                | 58.4  | 46.7  | 3.0                                                             | 2.5   | 2.0   |
|                 |              |                      | Complex with TF (Tig) | 78.9                                                | 66.7  | 51.5  | 3.9                                                             | 3.3   | 2.5   |
| P75857          | YcbS         | Cell outer membrane  | Monomer               | 71.3                                                | 60.2  | 46.5  | 3.0                                                             | 2.5   | 2.0   |
|                 |              |                      | Complex with SecB     | 57.6                                                | 47.0  | 37.6  | 1.7                                                             | 1.4   | 1.1   |
|                 |              |                      | Complex with TF (Tig) | 60.7                                                | 51.3  | 39.6  | 1.9                                                             | 1.6   | 1.3   |
| P75858          | YcbT         | Fimbrium             | Monomer               | 102.4                                               | 86.5  | 66.8  | 7.4                                                             | 6.3   | 4.8   |
|                 |              |                      | Complex with SecB     | 68.1                                                | 55.7  | 44.5  | 2.7                                                             | 2.2   | 1.7   |
|                 |              |                      | Complex with TF (Tig) | 74.2                                                | 62.7  | 48.4  | 3.3                                                             | 2.8   | 2.2   |
| P75859          | YcbU         |                      | Monomer               | 134.4                                               | 113.5 | 87.7  | 13.8                                                            | 11.6  | 9.0   |
| P75860          | YcbV         |                      | Monomer               | 135.5                                               | 114.5 | 88.4  | 14.0                                                            | 11.9  | 9.2   |
| P75862          | YcbW         |                      | Monomer               | 130.0                                               | 109.8 | 84.8  | 12.8                                                            | 10.8  | 8.4   |
| P75863          | YcbX         |                      | Monomer               | 99.6                                                | 84.1  | 65.0  | 6.9                                                             | 5.9   | 4.5   |
| P75867          | YcbZ         |                      | Monomer               | 82.4                                                | 69.6  | 53.8  | 4.4                                                             | 3.7   | 2.8   |
| P0AAC6          | YccA         | Cell inner membrane  | Monomer               | 123.7                                               | 104.5 | 80.7  | 11.5                                                            | 9.7   | 7.5   |
|                 |              |                      | Complex with SecB     | 72.1                                                | 58.9  | 47.1  | 3.1                                                             | 2.5   | 2.0   |
|                 |              |                      | Complex with TF (Tig) | 79.8                                                | 67.4  | 52.1  | 4.0                                                             | 3.4   | 2.6   |

| UniProtKB A. N. | Protein name | Subcellular location | Subunit               | $D_0 \left( \frac{\mu\text{m}^2}{\text{s}} \right)$ |       |       | $D_{\text{cyto}} \left( \frac{\mu\text{m}^2}{\text{s}} \right)$ |       |       |
|-----------------|--------------|----------------------|-----------------------|-----------------------------------------------------|-------|-------|-----------------------------------------------------------------|-------|-------|
|                 |              |                      |                       | 310 K                                               | 303 K | 293 K | 310 K                                                           | 303 K | 293 K |
| P24244          | YccB         | Membrane             | Monomer               | 257.6                                               | 217.6 | 168.1 | 51.0                                                            | 43.1  | 33.3  |
|                 |              |                      | Complex with SecB     | 79.3                                                | 64.8  | 51.7  | 3.9                                                             | 3.2   | 2.6   |
|                 |              |                      | Complex with TF (Tig) | 90.5                                                | 76.5  | 59.1  | 5.5                                                             | 4.7   | 3.6   |
| P36661          | YccE         |                      | Monomer               | 93.0                                                | 78.6  | 60.7  | 5.9                                                             | 5.0   | 3.8   |
| P0AB12          | YccF         | Cell inner membrane  | Monomer               | 142.5                                               | 120.4 | 93.0  | 15.7                                                            | 13.2  | 10.2  |
|                 |              |                      | Complex with SecB     | 74.4                                                | 60.8  | 48.6  | 3.4                                                             | 2.7   | 2.2   |
|                 |              |                      | Complex with TF (Tig) | 83.1                                                | 70.2  | 54.2  | 4.4                                                             | 3.8   | 2.9   |
| P0AB14          | YccJ         |                      | Monomer               | 183.7                                               | 155.2 | 119.8 | 26.6                                                            | 22.4  | 17.3  |
| P52636          | YccM         | Cell inner membrane  | Monomer               | 100.1                                               | 84.6  | 65.3  | 7.0                                                             | 5.9   | 4.6   |
|                 |              |                      | Complex with SecB     | 67.6                                                | 55.2  | 44.1  | 2.6                                                             | 2.1   | 1.7   |
|                 |              |                      | Complex with TF (Tig) | 73.5                                                | 62.1  | 47.9  | 3.2                                                             | 2.7   | 2.1   |
| P75870          | YccS         | Cell inner membrane  | Monomer               | 75.7                                                | 64.0  | 49.4  | 3.5                                                             | 3.0   | 2.3   |
|                 |              |                      | Complex with SecB     | 59.6                                                | 48.7  | 38.9  | 1.8                                                             | 1.5   | 1.2   |
|                 |              |                      | Complex with TF (Tig) | 63.1                                                | 53.3  | 41.2  | 2.2                                                             | 1.8   | 1.4   |
| P0A8X4          | YccT         |                      | Monomer               | 121.2                                               | 102.4 | 79.1  | 11.0                                                            | 9.3   | 7.2   |
| P75874          | YccU         |                      | Monomer               | 148.3                                               | 125.3 | 96.8  | 17.1                                                            | 14.4  | 11.1  |
| P0AB65          | YccX         |                      | Monomer               | 170.5                                               | 144.1 | 111.3 | 22.8                                                            | 19.3  | 14.9  |
| P31545          | YcdB         | Periplasm            | Monomer               | 94.2                                                | 79.6  | 61.5  | 6.1                                                             | 5.1   | 4.0   |
|                 |              |                      | Complex with SecB     | 66.0                                                | 53.9  | 43.1  | 2.4                                                             | 2.0   | 1.6   |
|                 |              |                      | Complex with TF (Tig) | 71.4                                                | 60.3  | 46.6  | 3.0                                                             | 2.5   | 2.0   |
| P0AB24          | YcdO         | Periplasm            | Monomer               | 99.1                                                | 83.7  | 64.7  | 6.9                                                             | 5.8   | 4.5   |
|                 |              |                      | Complex with SecB     | 67.3                                                | 55.0  | 43.9  | 2.6                                                             | 2.1   | 1.7   |
|                 |              |                      | Complex with TF (Tig) | 73.1                                                | 61.8  | 47.7  | 3.2                                                             | 2.7   | 2.1   |
| P75908          | YcdT         | Cell inner membrane  | Monomer               | 90.5                                                | 76.5  | 59.1  | 5.5                                                             | 4.7   | 3.6   |
|                 |              |                      | Complex with SecB     | 64.9                                                | 53.1  | 42.4  | 2.3                                                             | 1.9   | 1.5   |
|                 |              |                      | Complex with TF (Tig) | 70.0                                                | 59.1  | 45.7  | 2.8                                                             | 2.4   | 1.9   |
| P75910          | YcdU         | Cell membrane        | Monomer               | 101.5                                               | 85.8  | 66.3  | 7.3                                                             | 6.1   | 4.7   |
|                 |              |                      | Complex with SecB     | 67.9                                                | 55.5  | 44.3  | 2.6                                                             | 2.2   | 1.7   |
|                 |              |                      | Complex with TF (Tig) | 73.9                                                | 62.5  | 48.2  | 3.3                                                             | 2.8   | 2.2   |
| P75914          | YcdX         |                      | Monomer               | 117.1                                               | 98.9  | 76.4  | 10.1                                                            | 8.6   | 6.6   |
|                 |              |                      | Homotrimer            | 76.1                                                | 62.2  | 49.7  | 3.6                                                             | 2.9   | 2.3   |

| UniProtKB A. N. | Protein name | Subcellular location | Subunit               | $D_0 \left( \frac{\mu\text{m}^2}{\text{s}} \right)$ |       |       | $D_{\text{cyto}} \left( \frac{\mu\text{m}^2}{\text{s}} \right)$ |       |       |
|-----------------|--------------|----------------------|-----------------------|-----------------------------------------------------|-------|-------|-----------------------------------------------------------------|-------|-------|
|                 |              |                      |                       | 310 K                                               | 303 K | 293 K | 310 K                                                           | 303 K | 293 K |
| P75915          | YcdY         |                      | Monomer               | 129.7                                               | 109.5 | 84.6  | 12.7                                                            | 10.8  | 8.3   |
| P75916          | YcdZ         | Cell inner membrane  | Monomer               | 139.9                                               | 118.2 | 91.3  | 15.0                                                            | 12.7  | 9.8   |
|                 |              |                      | Complex with SecB     | 74.2                                                | 60.6  | 48.4  | 3.3                                                             | 2.7   | 2.2   |
|                 |              |                      | Complex with TF (Tig) | 82.7                                                | 69.9  | 54.0  | 4.4                                                             | 3.7   | 2.9   |
| P24188          | YceA         |                      | Monomer               | 100.4                                               | 84.8  | 65.5  | 7.1                                                             | 6.0   | 4.6   |
| P0AB26          | YceB         | Cell membrane        | Monomer               | 130.2                                               | 110.0 | 85.0  | 12.9                                                            | 10.9  | 8.4   |
|                 |              |                      | Complex with SecB     | 73.0                                                | 59.7  | 47.7  | 3.2                                                             | 2.6   | 2.1   |
|                 |              |                      | Complex with TF (Tig) | 81.1                                                | 68.5  | 52.9  | 4.2                                                             | 3.5   | 2.7   |
| P0AB28          | YceD         |                      | Monomer               | 133.3                                               | 112.6 | 87.0  | 13.5                                                            | 11.4  | 8.8   |
| P0A729          | YceF         | Cytoplasm            | Monomer               | 127.4                                               | 107.6 | 83.1  | 12.2                                                            | 10.3  | 8.0   |
| P28306          | YceG         |                      | Monomer               | 102.0                                               | 86.1  | 66.5  | 7.3                                                             | 6.2   | 4.8   |
| P29217          | YceH         |                      | Monomer               | 122.1                                               | 103.1 | 79.6  | 11.1                                                            | 9.4   | 7.3   |
| P0A8X2          | YceI         | Periplasm            | Monomer               | 129.2                                               | 109.1 | 84.3  | 12.6                                                            | 10.7  | 8.2   |
|                 |              |                      | Complex with SecB     | 72.9                                                | 59.6  | 47.6  | 3.2                                                             | 2.6   | 2.1   |
|                 |              |                      | Complex with TF (Tig) | 80.9                                                | 68.3  | 52.8  | 4.2                                                             | 3.5   | 2.7   |
| P75925          | YceJ         | Cell inner membrane  | Monomer               | 129.6                                               | 109.5 | 84.6  | 12.7                                                            | 10.8  | 8.3   |
|                 |              |                      | Complex with SecB     | 73.0                                                | 59.6  | 47.6  | 3.2                                                             | 2.6   | 2.1   |
|                 |              |                      | Complex with TF (Tig) | 80.9                                                | 68.4  | 52.8  | 4.2                                                             | 3.5   | 2.7   |
| P0AB31          | YceK         |                      | Monomer               | 184.4                                               | 155.7 | 120.3 | 26.8                                                            | 22.6  | 17.5  |
| P64442          | YceO         |                      | Monomer               | 212.2                                               | 179.3 | 138.5 | 35.3                                                            | 29.8  | 23.1  |
| P62066          | YceQ         |                      | Monomer               | 160.1                                               | 135.3 | 104.5 | 20.0                                                            | 16.9  | 13.1  |
| P27431          | YcfD         |                      | Monomer               | 97.8                                                | 82.6  | 63.8  | 6.6                                                             | 5.6   | 4.3   |
| P0AFQ7          | YcfH         |                      | Monomer               | 112.4                                               | 95.0  | 73.4  | 9.2                                                             | 7.8   | 6.0   |
| P0AB35          | YcfJ         | Membrane             | Monomer               | 134.4                                               | 113.5 | 87.7  | 13.8                                                            | 11.6  | 9.0   |
|                 |              |                      | Complex with SecB     | 73.5                                                | 60.1  | 48.0  | 3.3                                                             | 2.7   | 2.1   |
|                 |              |                      | Complex with TF (Tig) | 81.8                                                | 69.1  | 53.4  | 4.3                                                             | 3.6   | 2.8   |
| P45581          | YcfK         |                      | Monomer               | 126.6                                               | 107.0 | 82.6  | 12.1                                                            | 10.2  | 7.9   |
| P75946          | YcfL         |                      | Monomer               | 151.3                                               | 127.8 | 98.7  | 17.8                                                            | 15.0  | 11.6  |
| P0A8E1          | YcfP         |                      | Monomer               | 128.4                                               | 108.5 | 83.8  | 12.5                                                            | 10.5  | 8.1   |
| P75952          | YcfQ         |                      | Monomer               | 123.7                                               | 104.5 | 80.7  | 11.5                                                            | 9.7   | 7.5   |
| P75954          | YcfS         | Periplasm            | Monomer               | 106.0                                               | 89.6  | 69.2  | 8.0                                                             | 6.8   | 5.3   |

| UniProtKB A. N. | Protein name | Subcellular location           | Subunit               | $D_0 \left( \frac{\mu\text{m}^2}{\text{s}} \right)$ |       |       | $D_{\text{cyto}} \left( \frac{\mu\text{m}^2}{\text{s}} \right)$ |       |       |
|-----------------|--------------|--------------------------------|-----------------------|-----------------------------------------------------|-------|-------|-----------------------------------------------------------------|-------|-------|
|                 |              |                                |                       | 310 K                                               | 303 K | 293 K | 310 K                                                           | 303 K | 293 K |
|                 |              |                                | Complex with SecB     | 69.0                                                | 56.3  | 45.0  | 2.7                                                             | 2.2   | 1.8   |
|                 |              |                                | Complex with TF (Tig) | 75.3                                                | 63.6  | 49.1  | 3.5                                                             | 2.9   | 2.3   |
| P75955          | YcfT         | Cell inner membrane            | Monomer               | 99.4                                                | 84.0  | 64.9  | 6.9                                                             | 5.8   | 4.5   |
|                 |              |                                | Complex with SecB     | 67.4                                                | 55.1  | 44.0  | 2.6                                                             | 2.1   | 1.7   |
|                 |              |                                | Complex with TF (Tig) | 73.2                                                | 61.9  | 47.8  | 3.2                                                             | 2.7   | 2.1   |
| P75961          | YcfZ         | Cell inner membrane            | Monomer               | 113.9                                               | 96.2  | 74.3  | 9.5                                                             | 8.0   | 6.2   |
|                 |              |                                | Complex with SecB     | 70.5                                                | 57.6  | 46.0  | 2.9                                                             | 2.4   | 1.9   |
|                 |              |                                | Complex with TF (Tig) | 77.5                                                | 65.5  | 50.6  | 3.7                                                             | 3.1   | 2.4   |
| P29013          | YcgB         |                                | Monomer               | 85.0                                                | 71.8  | 55.5  | 4.7                                                             | 4.0   | 3.1   |
| P75989          | YcgE         |                                | Monomer               | 114.8                                               | 97.0  | 74.9  | 9.7                                                             | 8.2   | 6.3   |
| P75990          | YcgF         |                                | Monomer               | 95.4                                                | 80.6  | 62.3  | 6.3                                                             | 5.3   | 4.1   |
| P75995          | YcgG         | Cytoplasm                      | Monomer               | 87.3                                                | 73.7  | 56.9  | 5.0                                                             | 4.2   | 3.3   |
| P76000          | YcgI         |                                | Monomer               | 141.7                                               | 119.7 | 92.4  | 15.5                                                            | 13.1  | 10.1  |
| P76001          | YcgJ         |                                | Monomer               | 153.8                                               | 129.9 | 100.3 | 18.4                                                            | 15.6  | 12.0  |
| P76002          | YcgK         |                                | Monomer               | 147.5                                               | 124.6 | 96.3  | 16.9                                                            | 14.2  | 11.0  |
| P0AB43          | YcgL         |                                | Monomer               | 164.8                                               | 139.2 | 107.5 | 21.3                                                            | 18.0  | 13.9  |
| P76004          | YcgM         |                                | Monomer               | 123.0                                               | 103.9 | 80.3  | 11.3                                                            | 9.6   | 7.4   |
| P0A8L5          | YcgN         |                                | Monomer               | 137.3                                               | 116.0 | 89.6  | 14.4                                                            | 12.2  | 9.4   |
| P76010          | YcgR         | Bacterial flagellum basal body | Monomer               | 115.5                                               | 97.5  | 75.3  | 9.8                                                             | 8.3   | 6.4   |
|                 |              |                                | Complex with SecB     | 70.8                                                | 57.8  | 46.2  | 2.9                                                             | 2.4   | 1.9   |
|                 |              |                                | Complex with TF (Tig) | 77.9                                                | 65.8  | 50.8  | 3.8                                                             | 3.2   | 2.5   |
| P76017          | YcgV         |                                | Monomer               | 70.0                                                | 59.2  | 45.7  | 2.9                                                             | 2.4   | 1.9   |
| P75988          | YcgX         |                                | Monomer               | 144.3                                               | 121.9 | 94.2  | 16.1                                                            | 13.6  | 10.5  |
| P76012          | YcgY         |                                | Monomer               | 141.1                                               | 119.2 | 92.1  | 15.3                                                            | 12.9  | 10.0  |
| P75991          | YcgZ         |                                | Monomer               | 181.6                                               | 153.4 | 118.5 | 26.0                                                            | 21.9  | 16.9  |
| P25743          | YchE         | Cell membrane                  | Monomer               | 123.4                                               | 104.2 | 80.5  | 11.4                                                            | 9.6   | 7.4   |
|                 |              |                                | Complex with SecB     | 72.1                                                | 58.9  | 47.0  | 3.1                                                             | 2.5   | 2.0   |
|                 |              |                                | Complex with TF (Tig) | 79.7                                                | 67.3  | 52.0  | 4.0                                                             | 3.4   | 2.6   |
| P30192          | YchG         |                                | Monomer               | 107.0                                               | 90.4  | 69.8  | 8.2                                                             | 7.0   | 5.4   |
| P0AB49          | YchH         |                                | Monomer               | 169.3                                               | 143.1 | 110.5 | 22.5                                                            | 19.0  | 14.7  |
| P37052          | YchJ         |                                | Monomer               | 140.2                                               | 118.4 | 91.5  | 15.1                                                            | 12.8  | 9.9   |

| UniProtKB A. N. | Protein name | Subcellular location | Subunit               | $D_0 \left( \frac{\mu\text{m}^2}{\text{s}} \right)$ |       |       | $D_{\text{cyto}} \left( \frac{\mu\text{m}^2}{\text{s}} \right)$ |       |       |
|-----------------|--------------|----------------------|-----------------------|-----------------------------------------------------|-------|-------|-----------------------------------------------------------------|-------|-------|
|                 |              |                      |                       | 310 K                                               | 303 K | 293 K | 310 K                                                           | 303 K | 293 K |
| P0AFR2          | YchM         | Cell inner membrane  | Monomer               | 85.8                                                | 72.5  | 56.0  | 4.8                                                             | 4.1   | 3.1   |
|                 |              |                      | Complex with SecB     | 63.4                                                | 51.8  | 41.4  | 2.2                                                             | 1.8   | 1.4   |
|                 |              |                      | Complex with TF (Tig) | 68.0                                                | 57.4  | 44.4  | 2.6                                                             | 2.2   | 1.7   |
| P0AB52          | YchN         |                      | Monomer               | 157.1                                               | 132.7 | 102.5 | 19.3                                                            | 16.3  | 12.6  |
|                 |              |                      | Homoheptamer          | 77.8                                                | 63.6  | 50.8  | 3.8                                                             | 3.1   | 2.5   |
| P39165          | YchO         | Periplasm            | Monomer               | 90.3                                                | 76.3  | 58.9  | 5.5                                                             | 4.6   | 3.6   |
|                 |              |                      | Complex with SecB     | 64.9                                                | 53.0  | 42.3  | 2.3                                                             | 1.9   | 1.5   |
|                 |              |                      | Complex with TF (Tig) | 69.9                                                | 59.0  | 45.6  | 2.8                                                             | 2.4   | 1.9   |
| P76023          | YchS         |                      | Monomer               | 175.3                                               | 148.1 | 114.4 | 24.1                                                            | 20.4  | 15.8  |
| P0A8Z0          | YciA         |                      | Monomer               | 150.2                                               | 126.9 | 98.0  | 17.5                                                            | 14.8  | 11.4  |
| P21365          | YciC         | Cell inner membrane  | Monomer               | 117.9                                               | 99.6  | 76.9  | 10.3                                                            | 8.7   | 6.7   |
|                 |              |                      | Complex with SecB     | 71.2                                                | 58.2  | 46.5  | 3.0                                                             | 2.4   | 1.9   |
|                 |              |                      | Complex with TF (Tig) | 78.5                                                | 66.3  | 51.2  | 3.8                                                             | 3.2   | 2.5   |
| P21363          | YciE         |                      | Monomer               | 134.2                                               | 113.4 | 87.6  | 13.7                                                            | 11.6  | 9.0   |
| P21362          | YciF         |                      | Monomer               | 135.3                                               | 114.3 | 88.3  | 14.0                                                            | 11.8  | 9.1   |
|                 |              |                      | Homodimer             | 103.1                                               | 84.2  | 67.3  | 7.5                                                             | 6.2   | 4.9   |
| P21361          | YciG         |                      | Monomer               | 210.7                                               | 178.0 | 137.5 | 34.9                                                            | 29.4  | 22.7  |
| P08245          | YciH         |                      | Monomer               | 163.9                                               | 138.5 | 107.0 | 21.0                                                            | 17.8  | 13.7  |
| P0AB55          | YciI         |                      | Monomer               | 168.6                                               | 142.4 | 110.0 | 22.3                                                            | 18.8  | 14.6  |
|                 |              |                      | Homodimer             | 128.5                                               | 105.0 | 83.8  | 12.5                                                            | 10.2  | 8.1   |
| P31808          | YciK         |                      | Monomer               | 115.3                                               | 97.4  | 75.3  | 9.8                                                             | 8.3   | 6.4   |
| P0AB58          | YciM         |                      | Monomer               | 96.1                                                | 81.2  | 62.7  | 6.4                                                             | 5.4   | 4.2   |
| P0AB61          | YciN         |                      | Monomer               | 176.9                                               | 149.4 | 115.4 | 24.6                                                            | 20.8  | 16.1  |
| P0AFR4          | YciO         |                      | Monomer               | 124.0                                               | 104.8 | 80.9  | 11.5                                                            | 9.7   | 7.5   |
| P45848          | YciQ         |                      | Monomer               | 79.9                                                | 67.5  | 52.1  | 4.0                                                             | 3.4   | 2.6   |
| P0ACV4          | YciS         | Cell inner membrane  | Monomer               | 164.2                                               | 138.7 | 107.1 | 21.1                                                            | 17.8  | 13.8  |
|                 |              |                      | Complex with SecB     | 76.2                                                | 62.2  | 49.7  | 3.6                                                             | 2.9   | 2.3   |
|                 |              |                      | Complex with TF (Tig) | 85.7                                                | 72.4  | 55.9  | 4.8                                                             | 4.1   | 3.1   |
| P76034          | YciT         |                      | Monomer               | 115.9                                               | 97.9  | 75.6  | 9.9                                                             | 8.4   | 6.5   |
| P0A8L7          | YciU         |                      | Monomer               | 157.2                                               | 132.8 | 102.5 | 19.3                                                            | 16.3  | 12.6  |
| P76035          | YciW         |                      | Monomer               | 98.1                                                | 82.9  | 64.0  | 6.7                                                             | 5.7   | 4.4   |

| UniProtKB A. N. | Protein name | Subcellular location | Subunit               | $D_0 \left( \frac{\mu\text{m}^2}{\text{s}} \right)$ |       |       | $D_{\text{cyto}} \left( \frac{\mu\text{m}^2}{\text{s}} \right)$ |       |       |
|-----------------|--------------|----------------------|-----------------------|-----------------------------------------------------|-------|-------|-----------------------------------------------------------------|-------|-------|
|                 |              |                      |                       | 310 K                                               | 303 K | 293 K | 310 K                                                           | 303 K | 293 K |
| P58094          | YciX         |                      | Monomer               | 206.3                                               | 174.3 | 134.6 | 33.4                                                            | 28.2  | 21.8  |
| A5A613          | YciY         |                      | Monomer               | 197.3                                               | 166.7 | 128.7 | 30.6                                                            | 25.9  | 20.0  |
| A5A614          | YciZ         |                      | Monomer               | 205.0                                               | 173.2 | 133.8 | 33.0                                                            | 27.9  | 21.5  |
| P45736          | YcjD         |                      | Monomer               | 151.2                                               | 127.8 | 98.7  | 17.8                                                            | 15.0  | 11.6  |
| P0A8R7          | YcjF         | Cell inner membrane  | Monomer               | 100.8                                               | 85.2  | 65.8  | 7.1                                                             | 6.0   | 4.7   |
|                 |              |                      | Complex with SecB     | 67.8                                                | 55.4  | 44.2  | 2.6                                                             | 2.1   | 1.7   |
|                 |              |                      | Complex with TF (Tig) | 73.7                                                | 62.3  | 48.1  | 3.3                                                             | 2.8   | 2.1   |
| P51981          | YcjG         |                      | Monomer               | 106.0                                               | 89.5  | 69.1  | 8.0                                                             | 6.8   | 5.2   |
| P76041          | YcjM         |                      | Monomer               | 83.2                                                | 70.3  | 54.3  | 4.5                                                             | 3.8   | 2.9   |
| P76042          | YcjN         | Periplasm            | Monomer               | 94.2                                                | 79.6  | 61.5  | 6.1                                                             | 5.1   | 4.0   |
|                 |              |                      | Complex with SecB     | 66.0                                                | 53.9  | 43.1  | 2.4                                                             | 2.0   | 1.6   |
|                 |              |                      | Complex with TF (Tig) | 71.4                                                | 60.3  | 46.6  | 3.0                                                             | 2.5   | 2.0   |
| P0AFR7          | YcjO         | Cell inner membrane  | Monomer               | 107.8                                               | 91.0  | 70.3  | 8.4                                                             | 7.1   | 5.5   |
|                 |              |                      | Complex with SecB     | 69.3                                                | 56.6  | 45.2  | 2.8                                                             | 2.3   | 1.8   |
|                 |              |                      | Complex with TF (Tig) | 75.8                                                | 64.1  | 49.5  | 3.5                                                             | 3.0   | 2.3   |
| P77716          | YcjP         | Cell inner membrane  | Monomer               | 110.4                                               | 93.2  | 72.0  | 8.8                                                             | 7.5   | 5.8   |
|                 |              |                      | Complex with SecB     | 69.9                                                | 57.1  | 45.6  | 2.8                                                             | 2.3   | 1.9   |
|                 |              |                      | Complex with TF (Tig) | 76.6                                                | 64.7  | 50.0  | 3.6                                                             | 3.0   | 2.4   |
| P76043          | YcjQ         |                      | Monomer               | 102.0                                               | 86.2  | 66.6  | 7.3                                                             | 6.2   | 4.8   |
| P76044          | YcjR         |                      | Monomer               | 112.4                                               | 95.0  | 73.3  | 9.2                                                             | 7.8   | 6.0   |
| P77503          | YcjS         |                      | Monomer               | 101.5                                               | 85.8  | 66.3  | 7.3                                                             | 6.1   | 4.7   |
| P77154          | YcjT         |                      | Monomer               | 74.6                                                | 63.0  | 48.7  | 3.4                                                             | 2.9   | 2.2   |
| P77366          | YcjU         |                      | Monomer               | 123.3                                               | 104.2 | 80.4  | 11.4                                                            | 9.6   | 7.4   |
| P77481          | YcjV         |                      | Monomer               | 100.0                                               | 84.5  | 65.3  | 7.0                                                             | 5.9   | 4.6   |
| P77615          | YcjW         |                      | Monomer               | 104.3                                               | 88.1  | 68.0  | 7.7                                                             | 6.5   | 5.0   |
| P76046          | YcjX         |                      | Monomer               | 90.0                                                | 76.0  | 58.7  | 5.4                                                             | 4.6   | 3.5   |
| P76049          | YcjY         |                      | Monomer               | 107.2                                               | 90.6  | 70.0  | 8.3                                                             | 7.0   | 5.4   |
| P77333          | YcjZ         |                      | Monomer               | 107.4                                               | 90.8  | 70.1  | 8.3                                                             | 7.0   | 5.4   |
| P33230          | YdaC         |                      | Monomer               | 189.6                                               | 160.1 | 123.7 | 28.3                                                            | 23.9  | 18.5  |
| P38394          | YdaE         |                      | Monomer               | 203.2                                               | 171.7 | 132.6 | 32.5                                                            | 27.4  | 21.2  |
| P0ACW0          | YdaF         |                      | Monomer               | 214.0                                               | 180.8 | 139.7 | 35.9                                                            | 30.3  | 23.4  |

| UniProtKB A. N. | Protein name | Subcellular location | Subunit               | $D_0 \left( \frac{\mu\text{m}^2}{\text{s}} \right)$ |       |       | $D_{\text{cyto}} \left( \frac{\mu\text{m}^2}{\text{s}} \right)$ |       |       |
|-----------------|--------------|----------------------|-----------------------|-----------------------------------------------------|-------|-------|-----------------------------------------------------------------|-------|-------|
|                 |              |                      |                       | 310 K                                               | 303 K | 293 K | 310 K                                                           | 303 K | 293 K |
| P76061          | YdaG         |                      | Monomer               | 223.0                                               | 188.4 | 145.5 | 38.9                                                            | 32.8  | 25.4  |
| P76053          | YdaL         |                      | Monomer               | 127.8                                               | 107.9 | 83.4  | 12.3                                                            | 10.4  | 8.0   |
| P77302          | YdaM         |                      | Monomer               | 94.5                                                | 79.8  | 61.7  | 6.1                                                             | 5.2   | 4.0   |
|                 |              |                      | Homodimer             | 72.0                                                | 58.8  | 47.0  | 3.1                                                             | 2.5   | 2.0   |
| P76057          | YdaQ         |                      | Monomer               | 184.2                                               | 155.6 | 120.2 | 26.7                                                            | 22.6  | 17.4  |
| P76063          | YdaS         |                      | Monomer               | 166.3                                               | 140.5 | 108.5 | 21.7                                                            | 18.3  | 14.2  |
| P76064          | YdaT         |                      | Monomer               | 144.4                                               | 122.0 | 94.2  | 16.1                                                            | 13.6  | 10.5  |
| P76065          | YdaU         |                      | Monomer               | 108.7                                               | 91.8  | 70.9  | 8.5                                                             | 7.2   | 5.6   |
| P77546          | YdaV         |                      | Monomer               | 115.0                                               | 97.2  | 75.1  | 9.7                                                             | 8.2   | 6.3   |
| P76066          | YdaW         |                      | Monomer               | 126.4                                               | 106.8 | 82.5  | 12.0                                                            | 10.2  | 7.8   |
| P76069          | YdaY         |                      | Monomer               | 153.5                                               | 129.7 | 100.2 | 18.3                                                            | 15.5  | 12.0  |
| P33666          | YdbA         |                      | Monomer               | 52.7                                                | 44.5  | 34.4  | 1.3                                                             | 1.1   | 0.8   |
| P25906          | YdbC         |                      | Monomer               | 111.1                                               | 93.9  | 72.5  | 9.0                                                             | 7.6   | 5.9   |
| P25907          | YdbD         |                      | Monomer               | 74.0                                                | 62.5  | 48.3  | 3.3                                                             | 2.8   | 2.2   |
| P52645          | YdbH         |                      | Monomer               | 70.8                                                | 59.9  | 46.2  | 2.9                                                             | 2.5   | 1.9   |
| P0ACW2          | YdbJ         |                      | Monomer               | 182.2                                               | 154.0 | 118.9 | 26.1                                                            | 22.1  | 17.1  |
| P52647          | YdbK         |                      | Monomer               | 63.3                                                | 53.5  | 41.3  | 2.2                                                             | 1.8   | 1.4   |
| P76076          | YdbL         |                      | Monomer               | 161.3                                               | 136.2 | 105.2 | 20.3                                                            | 17.2  | 13.3  |
| P0ACW4          | YdcA         |                      | Monomer               | 212.7                                               | 179.7 | 138.8 | 35.5                                                            | 30.0  | 23.2  |
| P28917          | YdcC         |                      | Monomer               | 97.3                                                | 82.2  | 63.5  | 6.6                                                             | 5.5   | 4.3   |
| P31991          | YdcD         |                      | Monomer               | 134.4                                               | 113.5 | 87.7  | 13.8                                                            | 11.6  | 9.0   |
| P34209          | YdcF         |                      | Monomer               | 112.6                                               | 95.1  | 73.5  | 9.3                                                             | 7.8   | 6.0   |
| P0ACW6          | YdcH         |                      | Monomer               | 180.8                                               | 152.7 | 118.0 | 25.7                                                            | 21.7  | 16.8  |
| P77171          | YdcI         |                      | Monomer               | 107.5                                               | 90.8  | 70.2  | 8.3                                                             | 7.0   | 5.4   |
| P76097          | YdcJ         |                      | Monomer               | 91.1                                                | 76.9  | 59.4  | 5.6                                                             | 4.7   | 3.6   |
| P76100          | YdcK         |                      | Monomer               | 104.6                                               | 88.4  | 68.2  | 7.8                                                             | 6.6   | 5.1   |
|                 |              |                      | Monomer               | 121.6                                               | 102.7 | 79.3  | 11.0                                                            | 9.3   | 7.2   |
|                 |              |                      | Complex with SecB     | 71.8                                                | 58.7  | 46.9  | 3.1                                                             | 2.5   | 2.0   |
| P64451          | YdcL         | Cell membrane        | Complex with TF (Tig) | 79.3                                                | 67.0  | 51.8  | 4.0                                                             | 3.3   | 2.6   |
|                 |              |                      | Monomer               | 132.2                                               | 111.7 | 86.2  | 13.3                                                            | 11.2  | 8.7   |
| P77626          | YdcN         |                      | Monomer               | 132.2                                               | 111.7 | 86.2  | 13.3                                                            | 11.2  | 8.7   |
| P76103          | YdcO         | Cell inner membrane  | Monomer               | 99.6                                                | 84.2  | 65.0  | 6.9                                                             | 5.9   | 4.5   |
|                 |              |                      |                       |                                                     |       |       |                                                                 |       |       |



| UniProtKB A. N. | Protein name | Subcellular location | Subunit               | $D_0 \left( \frac{\mu\text{m}^2}{\text{s}} \right)$ |       |       | $D_{\text{cyto}} \left( \frac{\mu\text{m}^2}{\text{s}} \right)$ |       |       |
|-----------------|--------------|----------------------|-----------------------|-----------------------------------------------------|-------|-------|-----------------------------------------------------------------|-------|-------|
|                 |              |                      |                       | 310 K                                               | 303 K | 293 K | 310 K                                                           | 303 K | 293 K |
|                 |              |                      | Complex with SecB     | 67.5                                                | 55.1  | 44.0  | 2.6                                                             | 2.1   | 1.7   |
|                 |              |                      | Complex with TF (Tig) | 73.3                                                | 61.9  | 47.8  | 3.2                                                             | 2.7   | 2.1   |
| P76104          | YdcP         |                      | Monomer               | 79.3                                                | 67.0  | 51.7  | 3.9                                                             | 3.3   | 2.6   |
| P77730          | YdcR         |                      | Monomer               | 89.9                                                | 75.9  | 58.6  | 5.4                                                             | 4.6   | 3.5   |
|                 |              |                      | Monomer               | 98.0                                                | 82.8  | 64.0  | 6.7                                                             | 5.6   | 4.4   |
| P76108          | YdcS         | Periplasm            | Complex with SecB     | 67.1                                                | 54.8  | 43.8  | 2.5                                                             | 2.1   | 1.7   |
|                 |              |                      | Complex with TF (Tig) | 72.8                                                | 61.5  | 47.5  | 3.2                                                             | 2.7   | 2.1   |
| P77795          | YdcT         |                      | Monomer               | 103.3                                               | 87.2  | 67.4  | 7.6                                                             | 6.4   | 4.9   |
|                 |              |                      | Monomer               | 106.3                                               | 89.8  | 69.4  | 8.1                                                             | 6.8   | 5.3   |
| P77156          | YdcU         | Cell inner membrane  | Complex with SecB     | 69.0                                                | 56.4  | 45.0  | 2.7                                                             | 2.2   | 1.8   |
|                 |              |                      | Complex with TF (Tig) | 75.4                                                | 63.7  | 49.2  | 3.5                                                             | 2.9   | 2.3   |
|                 |              |                      | Monomer               | 114.1                                               | 96.4  | 74.4  | 9.5                                                             | 8.1   | 6.2   |
| P0AFR9          | YdcV         | Cell inner membrane  | Complex with SecB     | 70.6                                                | 57.6  | 46.0  | 2.9                                                             | 2.4   | 1.9   |
|                 |              |                      | Complex with TF (Tig) | 77.5                                                | 65.5  | 50.6  | 3.7                                                             | 3.2   | 2.4   |
|                 |              |                      | Monomer               | 202.5                                               | 171.1 | 132.1 | 32.2                                                            | 27.2  | 21.0  |
| P64453          | YdcX         | Cell membrane        | Complex with SecB     | 78.0                                                | 63.7  | 50.9  | 3.8                                                             | 3.1   | 2.5   |
|                 |              |                      | Complex with TF (Tig) | 88.5                                                | 74.8  | 57.8  | 5.2                                                             | 4.4   | 3.4   |
| P64455          | YdcY         |                      | Monomer               | 181.4                                               | 153.2 | 118.4 | 25.9                                                            | 21.9  | 16.9  |
|                 |              |                      | Monomer               | 144.0                                               | 121.7 | 94.0  | 16.0                                                            | 13.5  | 10.4  |
| P76111          | YdcZ         | Cell inner membrane  | Complex with SecB     | 74.6                                                | 60.9  | 48.7  | 3.4                                                             | 2.8   | 2.2   |
|                 |              |                      | Complex with TF (Tig) | 83.3                                                | 70.4  | 54.4  | 4.5                                                             | 3.8   | 2.9   |
|                 |              |                      | Monomer               | 82.8                                                | 70.0  | 54.1  | 4.4                                                             | 3.7   | 2.9   |
| P31826          | YddA         | Cell inner membrane  | Complex with SecB     | 62.4                                                | 50.9  | 40.7  | 2.1                                                             | 1.7   | 1.4   |
|                 |              |                      | Complex with TF (Tig) | 66.6                                                | 56.3  | 43.5  | 2.5                                                             | 2.1   | 1.6   |
| P31827          | YddB         |                      | Monomer               | 73.1                                                | 61.8  | 47.7  | 3.2                                                             | 2.7   | 2.1   |
|                 |              |                      | Monomer               | 108.9                                               | 92.0  | 71.1  | 8.6                                                             | 7.2   | 5.6   |
| P37757          | YddE         |                      | Homodimer             | 83.0                                                | 67.8  | 54.2  | 4.4                                                             | 3.6   | 2.9   |
|                 |              |                      | Homotetramer          | 63.3                                                | 53.4  | 41.3  | 2.2                                                             | 1.8   | 1.4   |
|                 |              |                      | Monomer               | 110.0                                               | 92.9  | 71.8  | 8.8                                                             | 7.4   | 5.7   |
| P46136          | YddG         | Cell inner membrane  | Complex with SecB     | 69.8                                                | 57.0  | 45.5  | 2.8                                                             | 2.3   | 1.8   |
|                 |              |                      | Complex with TF (Tig) | 76.5                                                | 64.6  | 49.9  | 3.6                                                             | 3.0   | 2.3   |

| UniProtKB A. N. | Protein name | Subcellular location | Subunit               | $D_0 \left( \frac{\mu\text{m}^2}{\text{s}} \right)$ |       |       | $D_{\text{cyto}} \left( \frac{\mu\text{m}^2}{\text{s}} \right)$ |       |       |
|-----------------|--------------|----------------------|-----------------------|-----------------------------------------------------|-------|-------|-----------------------------------------------------------------|-------|-------|
|                 |              |                      |                       | 310 K                                               | 303 K | 293 K | 310 K                                                           | 303 K | 293 K |
| P76121          | YddH         |                      | Monomer               | 129.1                                               | 109.0 | 84.2  | 12.6                                                            | 10.6  | 8.2   |
| P76122          | YddJ         |                      | Monomer               | 156.3                                               | 132.0 | 102.0 | 19.0                                                            | 16.1  | 12.4  |
| P76123          | YddK         |                      | Monomer               | 104.1                                               | 88.0  | 68.0  | 7.7                                                             | 6.5   | 5.0   |
| P77519          | YddL         |                      | Monomer               | 167.8                                               | 141.7 | 109.5 | 22.1                                                            | 18.7  | 14.4  |
| P67699          | YddM         |                      | Monomer               | 169.9                                               | 143.5 | 110.9 | 22.7                                                            | 19.1  | 14.8  |
| P64426          | YddW         | Cell membrane        | Monomer               | 92.1                                                | 77.8  | 60.1  | 5.7                                                             | 4.9   | 3.7   |
|                 |              |                      | Complex with SecB     | 65.4                                                | 53.4  | 42.7  | 2.4                                                             | 1.9   | 1.6   |
|                 |              |                      | Complex with TF (Tig) | 70.6                                                | 59.6  | 46.1  | 2.9                                                             | 2.5   | 1.9   |
| P31126          | YdeE         | Cell membrane        | Monomer               | 97.7                                                | 82.5  | 63.8  | 6.6                                                             | 5.6   | 4.3   |
|                 |              |                      | Complex with SecB     | 67.0                                                | 54.7  | 43.7  | 2.5                                                             | 2.1   | 1.7   |
|                 |              |                      | Complex with TF (Tig) | 72.6                                                | 61.4  | 47.4  | 3.1                                                             | 2.7   | 2.1   |
| P31129          | YdeH         |                      | Monomer               | 106.9                                               | 90.4  | 69.8  | 8.2                                                             | 6.9   | 5.4   |
|                 |              |                      | Homodimer             | 81.5                                                | 66.6  | 53.2  | 4.2                                                             | 3.5   | 2.8   |
| P31130          | YdeI         |                      | Monomer               | 150.7                                               | 127.3 | 98.3  | 17.6                                                            | 14.9  | 11.5  |
| P31131          | YdeJ         |                      | Monomer               | 136.1                                               | 115.0 | 88.8  | 14.2                                                            | 12.0  | 9.2   |
| P32051          | YdeK         | Cell membrane        | Monomer               | 61.9                                                | 52.3  | 40.4  | 2.0                                                             | 1.7   | 1.3   |
|                 |              |                      | Complex with SecB     | 52.7                                                | 43.1  | 34.4  | 1.3                                                             | 1.1   | 0.8   |
|                 |              |                      | Complex with TF (Tig) | 55.0                                                | 46.5  | 35.9  | 1.5                                                             | 1.2   | 1.0   |
| P76134          | YdeM         |                      | Monomer               | 96.1                                                | 81.2  | 62.7  | 6.4                                                             | 5.4   | 4.2   |
| P77318          | YdeN         |                      | Monomer               | 84.0                                                | 70.9  | 54.8  | 4.6                                                             | 3.9   | 3.0   |
| P76135          | YdeO         |                      | Monomer               | 114.1                                               | 96.4  | 74.4  | 9.5                                                             | 8.1   | 6.2   |
| P77561          | YdeP         |                      | Monomer               | 75.1                                                | 63.4  | 49.0  | 3.4                                                             | 2.9   | 2.2   |
| P77588          | YdeQ         | Fimbrium             | Monomer               | 109.3                                               | 92.3  | 71.3  | 8.6                                                             | 7.3   | 5.6   |
|                 |              |                      | Complex with SecB     | 69.6                                                | 56.9  | 45.4  | 2.8                                                             | 2.3   | 1.8   |
|                 |              |                      | Complex with TF (Tig) | 76.3                                                | 64.4  | 49.8  | 3.6                                                             | 3.0   | 2.3   |
| P77294          | YdeR         | Fimbrium             | Monomer               | 136.6                                               | 115.4 | 89.1  | 14.3                                                            | 12.1  | 9.3   |
|                 |              |                      | Complex with SecB     | 73.8                                                | 60.3  | 48.2  | 3.3                                                             | 2.7   | 2.1   |
|                 |              |                      | Complex with TF (Tig) | 82.2                                                | 69.4  | 53.6  | 4.3                                                             | 3.7   | 2.8   |
| P77789          | YdeS         | Fimbrium             | Monomer               | 134.3                                               | 113.4 | 87.6  | 13.8                                                            | 11.6  | 9.0   |
|                 |              |                      | Complex with SecB     | 73.5                                                | 60.1  | 48.0  | 3.2                                                             | 2.7   | 2.1   |
|                 |              |                      | Complex with TF (Tig) | 81.8                                                | 69.1  | 53.4  | 4.3                                                             | 3.6   | 2.8   |

| UniProtKB A. N. | Protein name | Subcellular location | Subunit               | $D_0 \left( \frac{\mu\text{m}^2}{\text{s}} \right)$ |       |       | $D_{\text{cyto}} \left( \frac{\mu\text{m}^2}{\text{s}} \right)$ |       |       |
|-----------------|--------------|----------------------|-----------------------|-----------------------------------------------------|-------|-------|-----------------------------------------------------------------|-------|-------|
|                 |              |                      |                       | 310 K                                               | 303 K | 293 K | 310 K                                                           | 303 K | 293 K |
| P76137          | YdeT         |                      | Monomer               | 98.6                                                | 83.3  | 64.4  | 6.8                                                             | 5.7   | 4.4   |
| P77286          | YdeU         |                      | Monomer               | 91.4                                                | 77.2  | 59.7  | 5.6                                                             | 4.8   | 3.7   |
| P0ACW8          | YdfA         |                      | Monomer               | 213.7                                               | 180.5 | 139.5 | 35.8                                                            | 30.3  | 23.4  |
| P29009          | YdfB         |                      | Monomer               | 232.2                                               | 196.1 | 151.5 | 42.0                                                            | 35.5  | 27.4  |
| P21418          | YdfC         |                      | Monomer               | 185.2                                               | 156.4 | 120.8 | 27.0                                                            | 22.8  | 17.6  |
| P29010          | YdfD         |                      | Monomer               | 200.2                                               | 169.1 | 130.6 | 31.5                                                            | 26.6  | 20.6  |
| Q47138          | YdfE         |                      | Monomer               | 113.5                                               | 95.9  | 74.1  | 9.4                                                             | 8.0   | 6.2   |
| P39831          | YdfG         |                      | Monomer               | 116.5                                               | 98.4  | 76.0  | 10.0                                                            | 8.5   | 6.5   |
|                 |              |                      | Homotetramer          | 67.6                                                | 55.3  | 44.1  | 2.6                                                             | 2.1   | 1.7   |
| P0ACM2          | YdfH         |                      | Monomer               | 117.6                                               | 99.4  | 76.8  | 10.2                                                            | 8.6   | 6.7   |
| P77260          | YdfI         |                      | Monomer               | 89.3                                                | 75.4  | 58.3  | 5.3                                                             | 4.5   | 3.5   |
| P77228          | YdfJ         | Cell inner membrane  | Monomer               | 94.6                                                | 79.9  | 61.8  | 6.1                                                             | 5.2   | 4.0   |
|                 |              |                      | Complex with SecB     | 66.1                                                | 54.0  | 43.2  | 2.5                                                             | 2.0   | 1.6   |
|                 |              |                      | Complex with TF (Tig) | 71.5                                                | 60.4  | 46.7  | 3.0                                                             | 2.6   | 2.0   |
| P76154          | YdfK         |                      | Monomer               | 171.6                                               | 145.0 | 112.0 | 23.1                                                            | 19.5  | 15.1  |
| P76156          | YdfO         |                      | Monomer               | 141.8                                               | 119.8 | 92.5  | 15.5                                                            | 13.1  | 10.1  |
| P76160          | YdfR         |                      | Monomer               | 160.1                                               | 135.3 | 104.5 | 20.0                                                            | 16.9  | 13.1  |
| P76162          | YdfU         |                      | Monomer               | 100.9                                               | 85.3  | 65.9  | 7.2                                                             | 6.1   | 4.7   |
| P76163          | YdfV         |                      | Monomer               | 164.4                                               | 138.9 | 107.3 | 21.2                                                            | 17.9  | 13.8  |
| P76164          | YdfW         |                      | Monomer               | 182.0                                               | 153.7 | 118.7 | 26.1                                                            | 22.0  | 17.0  |
| P76165          | YdfX         |                      | Monomer               | 166.3                                               | 140.5 | 108.5 | 21.7                                                            | 18.3  | 14.2  |
| P64463          | YdfZ         |                      | Monomer               | 195.4                                               | 165.1 | 127.5 | 30.1                                                            | 25.4  | 19.6  |
|                 |              |                      | Monomer               | 88.6                                                | 74.9  | 57.8  | 5.2                                                             | 4.4   | 3.4   |
| P77804          | YdgA         | Cell inner membrane  | Complex with SecB     | 64.3                                                | 52.6  | 42.0  | 2.3                                                             | 1.9   | 1.5   |
|                 |              |                      | Complex with TF (Tig) | 69.2                                                | 58.4  | 45.1  | 2.8                                                             | 2.3   | 1.8   |
|                 |              |                      | Monomer               | 159.0                                               | 134.3 | 103.7 | 19.7                                                            | 16.7  | 12.9  |
| P0ACX0          | YdgC         | Cell inner membrane  | Complex with SecB     | 75.8                                                | 61.9  | 49.5  | 3.5                                                             | 2.9   | 2.3   |
|                 |              |                      | Complex with TF (Tig) | 85.2                                                | 72.0  | 55.6  | 4.7                                                             | 4.0   | 3.1   |
|                 |              |                      | Monomer               | 113.2                                               | 95.7  | 73.9  | 9.4                                                             | 7.9   | 6.1   |
| P76176          | YdgD         |                      | Monomer               | 113.2                                               | 95.7  | 73.9  | 9.4                                                             | 7.9   | 6.1   |
| P76177          | YdgH         |                      | Monomer               | 106.9                                               | 90.3  | 69.8  | 8.2                                                             | 6.9   | 5.4   |
| P0AAE5          | YdgI         | Cell inner membrane  | Monomer               | 92.2                                                | 77.9  | 60.1  | 5.8                                                             | 4.9   | 3.8   |
|                 |              |                      | Monomer               | 92.2                                                | 77.9  | 60.1  | 5.8                                                             | 4.9   | 3.8   |

| UniProtKB A. N. | Protein name | Subcellular location | Subunit               | $D_0 \left( \frac{\mu\text{m}^2}{\text{s}} \right)$ |       |       | $D_{\text{cyto}} \left( \frac{\mu\text{m}^2}{\text{s}} \right)$ |       |       |
|-----------------|--------------|----------------------|-----------------------|-----------------------------------------------------|-------|-------|-----------------------------------------------------------------|-------|-------|
|                 |              |                      |                       | 310 K                                               | 303 K | 293 K | 310 K                                                           | 303 K | 293 K |
|                 |              |                      | Complex with SecB     | 65.4                                                | 53.5  | 42.7  | 2.4                                                             | 1.9   | 1.6   |
|                 |              |                      | Complex with TF (Tig) | 70.6                                                | 59.6  | 46.1  | 2.9                                                             | 2.5   | 1.9   |
| P77376          | YdgJ         |                      | Monomer               | 102.0                                               | 86.1  | 66.5  | 7.3                                                             | 6.2   | 4.8   |
|                 |              |                      | Monomer               | 142.4                                               | 120.3 | 92.9  | 15.6                                                            | 13.2  | 10.2  |
| P76180          | YdgK         | Cell inner membrane  | Complex with SecB     | 74.4                                                | 60.8  | 48.6  | 3.4                                                             | 2.7   | 2.2   |
|                 |              |                      | Complex with TF (Tig) | 83.1                                                | 70.2  | 54.2  | 4.4                                                             | 3.8   | 2.9   |
| A5A617          | YdgU         |                      | Monomer               | 268.5                                               | 226.8 | 175.2 | 55.0                                                            | 46.5  | 35.9  |
| P0ACR2          | YdhB         |                      | Monomer               | 105.3                                               | 88.9  | 68.7  | 7.9                                                             | 6.7   | 5.2   |
|                 |              |                      | Monomer               | 97.1                                                | 82.0  | 63.3  | 6.5                                                             | 5.5   | 4.3   |
| P37597          | YdhC         | Cell inner membrane  | Complex with SecB     | 66.8                                                | 54.6  | 43.6  | 2.5                                                             | 2.1   | 1.6   |
|                 |              |                      | Complex with TF (Tig) | 72.4                                                | 61.2  | 47.3  | 3.1                                                             | 2.6   | 2.0   |
| P76187          | YdhF         |                      | Monomer               | 107.2                                               | 90.5  | 69.9  | 8.3                                                             | 7.0   | 5.4   |
|                 |              |                      | Monomer               | 180.7                                               | 152.6 | 117.9 | 25.7                                                            | 21.7  | 16.8  |
| P64471          | YdhI         | Cell membrane        | Complex with SecB     | 77.1                                                | 63.0  | 50.3  | 3.7                                                             | 3.0   | 2.4   |
|                 |              |                      | Complex with TF (Tig) | 87.2                                                | 73.6  | 56.9  | 5.0                                                             | 4.2   | 3.3   |
|                 |              |                      | Monomer               | 110.0                                               | 93.0  | 71.8  | 8.8                                                             | 7.4   | 5.7   |
| P76185          | YdhJ         | Membrane             | Complex with SecB     | 69.8                                                | 57.0  | 45.5  | 2.8                                                             | 2.3   | 1.8   |
|                 |              |                      | Complex with TF (Tig) | 76.5                                                | 64.6  | 49.9  | 3.6                                                             | 3.0   | 2.3   |
|                 |              |                      | Monomer               | 78.2                                                | 66.1  | 51.0  | 3.8                                                             | 3.2   | 2.5   |
| P76186          | YdhK         | Cell membrane        | Complex with SecB     | 60.6                                                | 49.5  | 39.5  | 1.9                                                             | 1.6   | 1.3   |
|                 |              |                      | Complex with TF (Tig) | 64.4                                                | 54.4  | 42.0  | 2.3                                                             | 1.9   | 1.5   |
| P64474          | YdhL         |                      | Monomer               | 177.1                                               | 149.6 | 115.5 | 24.7                                                            | 20.8  | 16.1  |
| P76190          | YdhO         |                      | Monomer               | 112.3                                               | 94.8  | 73.3  | 9.2                                                             | 7.8   | 6.0   |
|                 |              |                      | Monomer               | 100.1                                               | 84.6  | 65.3  | 7.0                                                             | 5.9   | 4.6   |
| P77389          | YdhP         | Cell inner membrane  | Complex with SecB     | 67.6                                                | 55.2  | 44.1  | 2.6                                                             | 2.1   | 1.7   |
|                 |              |                      | Complex with TF (Tig) | 73.5                                                | 62.1  | 47.9  | 3.2                                                             | 2.7   | 2.1   |
| P77552          | YdhQ         |                      | Monomer               | 97.5                                                | 82.4  | 63.6  | 6.6                                                             | 5.6   | 4.3   |
|                 |              |                      | Monomer               | 164.5                                               | 139.0 | 107.4 | 21.2                                                            | 17.9  | 13.8  |
| P0ACX3          | YdhR         |                      | Homodimer             | 125.4                                               | 102.4 | 81.8  | 11.8                                                            | 9.7   | 7.7   |
| P77148          | YdhS         |                      | Monomer               | 85.0                                                | 71.9  | 55.5  | 4.7                                                             | 4.0   | 3.1   |
| P77147          | YdhT         |                      | Monomer               | 113.1                                               | 95.6  | 73.8  | 9.4                                                             | 7.9   | 6.1   |

| UniProtKB A. N. | Protein name | Subcellular location | Subunit               | $D_0 \left( \frac{\mu\text{m}^2}{\text{s}} \right)$ |       |       | $D_{\text{cyto}} \left( \frac{\mu\text{m}^2}{\text{s}} \right)$ |       |       |
|-----------------|--------------|----------------------|-----------------------|-----------------------------------------------------|-------|-------|-----------------------------------------------------------------|-------|-------|
|                 |              |                      |                       | 310 K                                               | 303 K | 293 K | 310 K                                                           | 303 K | 293 K |
| P77409          | YdhU         | Cell inner membrane  | Monomer               | 112.8                                               | 95.3  | 73.6  | 9.3                                                             | 7.8   | 6.1   |
|                 |              |                      | Complex with SecB     | 70.3                                                | 57.4  | 45.9  | 2.9                                                             | 2.4   | 1.9   |
|                 |              |                      | Complex with TF (Tig) | 77.2                                                | 65.2  | 50.4  | 3.7                                                             | 3.1   | 2.4   |
| P76192          | YdhV         |                      | Monomer               | 77.2                                                | 65.2  | 50.4  | 3.7                                                             | 3.1   | 2.4   |
| P77564          | YdhW         |                      | Monomer               | 121.6                                               | 102.7 | 79.3  | 11.0                                                            | 9.3   | 7.2   |
| P77375          | YdhX         |                      | Monomer               | 120.3                                               | 101.6 | 78.5  | 10.8                                                            | 9.1   | 7.0   |
| P0AAL6          | YdhY         |                      | Monomer               | 125.8                                               | 106.3 | 82.1  | 11.9                                                            | 10.1  | 7.8   |
| P0ACX5          | YdhZ         |                      | Monomer               | 189.2                                               | 159.8 | 123.4 | 28.2                                                            | 23.8  | 18.4  |
| P0A8A4          | YdiA         |                      | Monomer               | 110.4                                               | 93.3  | 72.1  | 8.8                                                             | 7.5   | 5.8   |
| P0A6D5          | YdiB         |                      | Monomer               | 110.4                                               | 93.3  | 72.0  | 8.8                                                             | 7.5   | 5.8   |
|                 |              |                      | Homodimer             | 84.1                                                | 68.7  | 54.9  | 4.6                                                             | 3.7   | 3.0   |
| P0ACX9          | YdiE         |                      | Monomer               | 197.1                                               | 166.5 | 128.6 | 30.6                                                            | 25.8  | 20.0  |
| P37766          | YdiF         |                      | Monomer               | 86.9                                                | 73.4  | 56.7  | 5.0                                                             | 4.2   | 3.2   |
| P64476          | YdiH         |                      | Monomer               | 195.5                                               | 165.2 | 127.6 | 30.1                                                            | 25.4  | 19.6  |
| P77781          | YdiI         |                      | Monomer               | 147.4                                               | 124.5 | 96.2  | 16.8                                                            | 14.2  | 11.0  |
|                 |              |                      | Homodimer             | 112.3                                               | 91.8  | 73.3  | 9.2                                                             | 7.5   | 6.0   |
|                 |              |                      | Homotetramer          | 85.6                                                | 72.3  | 55.9  | 4.8                                                             | 4.0   | 3.1   |
| P77748          | YdiJ         |                      | Monomer               | 66.6                                                | 56.3  | 43.5  | 2.5                                                             | 2.1   | 1.6   |
| P0AFS7          | YdiK         | Cell inner membrane  | Monomer               | 100.3                                               | 84.8  | 65.5  | 7.1                                                             | 6.0   | 4.6   |
|                 |              |                      | Complex with SecB     | 67.6                                                | 55.3  | 44.1  | 2.6                                                             | 2.1   | 1.7   |
|                 |              |                      | Complex with TF (Tig) | 73.5                                                | 62.1  | 48.0  | 3.2                                                             | 2.7   | 2.1   |
| P76196          | YdiL         |                      | Monomer               | 151.5                                               | 128.0 | 98.9  | 17.8                                                            | 15.1  | 11.6  |
| P76197          | YdiM         | Cell inner membrane  | Monomer               | 96.0                                                | 81.1  | 62.6  | 6.4                                                             | 5.4   | 4.1   |
|                 |              |                      | Complex with SecB     | 66.5                                                | 54.3  | 43.4  | 2.5                                                             | 2.0   | 1.6   |
|                 |              |                      | Complex with TF (Tig) | 72.0                                                | 60.9  | 47.0  | 3.1                                                             | 2.6   | 2.0   |
| P76198          | YdiN         | Cell inner membrane  | Monomer               | 94.8                                                | 80.1  | 61.9  | 6.2                                                             | 5.2   | 4.0   |
|                 |              |                      | Complex with SecB     | 66.2                                                | 54.1  | 43.2  | 2.5                                                             | 2.0   | 1.6   |
|                 |              |                      | Complex with TF (Tig) | 71.6                                                | 60.5  | 46.7  | 3.0                                                             | 2.6   | 2.0   |
| P0A9U8          | YdiO         |                      | Monomer               | 97.4                                                | 82.3  | 63.6  | 6.6                                                             | 5.6   | 4.3   |
| P77402          | YdiP         |                      | Monomer               | 105.7                                               | 89.3  | 69.0  | 8.0                                                             | 6.8   | 5.2   |
| P76201          | YdiQ         |                      | Monomer               | 116.1                                               | 98.1  | 75.8  | 9.9                                                             | 8.4   | 6.5   |

| UniProtKB A. N. | Protein name | Subcellular location | Subunit                 | $D_0 \left( \frac{\mu\text{m}^2}{\text{s}} \right)$ |       |       | $D_{\text{cyto}} \left( \frac{\mu\text{m}^2}{\text{s}} \right)$ |       |       |
|-----------------|--------------|----------------------|-------------------------|-----------------------------------------------------|-------|-------|-----------------------------------------------------------------|-------|-------|
|                 |              |                      |                         | 310 K                                               | 303 K | 293 K | 310 K                                                           | 303 K | 293 K |
|                 |              |                      | Heterodimer (YdiQ–YdiR) | 84.8                                                | 71.6  | 55.3  | 4.7                                                             | 4.0   | 3.1   |
| P77378          | YdiR         |                      | Monomer                 | 107.1                                               | 90.5  | 69.9  | 8.2                                                             | 7.0   | 5.4   |
|                 |              |                      | Heterodimer (YdiQ–YdiR) | 84.8                                                | 71.6  | 55.3  | 4.7                                                             | 4.0   | 3.1   |
| P77337          | YdiS         |                      | Monomer                 | 94.9                                                | 80.2  | 61.9  | 6.2                                                             | 5.2   | 4.0   |
| P77714          | YdiT         |                      | Monomer                 | 167.9                                               | 141.8 | 109.5 | 22.1                                                            | 18.7  | 14.4  |
| P77649          | YdiU         |                      | Monomer                 | 88.8                                                | 75.0  | 58.0  | 5.3                                                             | 4.4   | 3.4   |
| P76204          | YdiV         |                      | Monomer                 | 116.8                                               | 98.7  | 76.2  | 10.1                                                            | 8.5   | 6.6   |
| P76206          | YdiY         |                      | Monomer                 | 115.9                                               | 97.9  | 75.6  | 9.9                                                             | 8.4   | 6.5   |
| P64479          | YdiZ         |                      | Monomer                 | 167.0                                               | 141.1 | 109.0 | 21.9                                                            | 18.5  | 14.3  |
| P0ACY1          | YdjA         |                      | Monomer                 | 131.3                                               | 110.9 | 85.7  | 13.1                                                            | 11.1  | 8.5   |
|                 |              |                      | Homodimer               | 100.1                                               | 81.8  | 65.3  | 7.0                                                             | 5.7   | 4.6   |
|                 |              |                      | Monomer                 | 91.6                                                | 77.4  | 59.8  | 5.7                                                             | 4.8   | 3.7   |
| P38055          | YdjE         | Cell inner membrane  | Complex with SecB       | 65.3                                                | 53.3  | 42.6  | 2.4                                                             | 1.9   | 1.5   |
|                 |              |                      | Complex with TF (Tig)   | 70.4                                                | 59.4  | 45.9  | 2.9                                                             | 2.4   | 1.9   |
| P77721          | YdjF         |                      | Monomer                 | 114.8                                               | 97.0  | 74.9  | 9.7                                                             | 8.2   | 6.3   |
| P77256          | YdjG         |                      | Monomer                 | 104.0                                               | 87.9  | 67.9  | 7.7                                                             | 6.5   | 5.0   |
| P77493          | YdjH         |                      | Monomer                 | 106.6                                               | 90.1  | 69.6  | 8.2                                                             | 6.9   | 5.3   |
| P77704          | YdjI         |                      | Monomer                 | 111.0                                               | 93.8  | 72.4  | 9.0                                                             | 7.6   | 5.8   |
| P77280          | YdjJ         |                      | Monomer                 | 102.5                                               | 86.6  | 66.9  | 7.4                                                             | 6.3   | 4.9   |
|                 |              |                      | Monomer                 | 92.1                                                | 77.8  | 60.1  | 5.7                                                             | 4.9   | 3.7   |
| P76230          | YdjK         | Cell inner membrane  | Complex with SecB       | 65.4                                                | 53.4  | 42.7  | 2.4                                                             | 1.9   | 1.6   |
|                 |              |                      | Complex with TF (Tig)   | 70.6                                                | 59.6  | 46.1  | 2.9                                                             | 2.5   | 1.9   |
| P77539          | YdjL         |                      | Monomer                 | 101.5                                               | 85.7  | 66.2  | 7.3                                                             | 6.1   | 4.7   |
|                 |              |                      | Monomer                 | 125.9                                               | 106.3 | 82.1  | 11.9                                                            | 10.1  | 7.8   |
| P64481          | YdjM         | Cell inner membrane  | Complex with SecB       | 72.4                                                | 59.2  | 47.3  | 3.1                                                             | 2.6   | 2.0   |
|                 |              |                      | Complex with TF (Tig)   | 80.2                                                | 67.8  | 52.3  | 4.1                                                             | 3.4   | 2.7   |
|                 |              |                      | Monomer                 | 92.8                                                | 78.4  | 60.5  | 5.8                                                             | 4.9   | 3.8   |
| P77529          | YdjN         | Cell membrane        | Complex with SecB       | 65.6                                                | 53.6  | 42.8  | 2.4                                                             | 2.0   | 1.6   |
|                 |              |                      | Complex with TF (Tig)   | 70.8                                                | 59.8  | 46.2  | 2.9                                                             | 2.5   | 1.9   |
| P76210          | YdjO         |                      | Monomer                 | 111.9                                               | 94.5  | 73.0  | 9.1                                                             | 7.7   | 6.0   |
|                 |              |                      | Monomer                 | 118.5                                               | 100.1 | 77.3  | 10.4                                                            | 8.8   | 6.8   |
| P76219          | YdjX         | Cell membrane        |                         |                                                     |       |       |                                                                 |       |       |

| UniProtKB A. N. | Protein name | Subcellular location | Subunit               | $D_0 \left( \frac{\mu\text{m}^2}{\text{s}} \right)$ |       |       | $D_{\text{cyto}} \left( \frac{\mu\text{m}^2}{\text{s}} \right)$ |       |       |
|-----------------|--------------|----------------------|-----------------------|-----------------------------------------------------|-------|-------|-----------------------------------------------------------------|-------|-------|
|                 |              |                      |                       | 310 K                                               | 303 K | 293 K | 310 K                                                           | 303 K | 293 K |
|                 |              |                      | Complex with SecB     | 71.3                                                | 58.3  | 46.5  | 3.0                                                             | 2.4   | 2.0   |
|                 |              |                      | Complex with TF (Tig) | 78.6                                                | 66.4  | 51.3  | 3.9                                                             | 3.3   | 2.5   |
| P76220          | YdjY         |                      | Monomer               | 122.2                                               | 103.2 | 79.7  | 11.1                                                            | 9.4   | 7.3   |
|                 |              |                      | Monomer               | 118.3                                               | 100.0 | 77.2  | 10.4                                                            | 8.8   | 6.8   |
| P76221          | YdjZ         | Cell inner membrane  | Complex with SecB     | 71.3                                                | 58.2  | 46.5  | 3.0                                                             | 2.4   | 2.0   |
|                 |              |                      | Complex with TF (Tig) | 78.6                                                | 66.4  | 51.3  | 3.9                                                             | 3.3   | 2.5   |
| P76231          | YeaC         |                      | Monomer               | 170.3                                               | 143.9 | 111.1 | 22.8                                                            | 19.2  | 14.9  |
| P39173          | YeaD         |                      | Monomer               | 108.5                                               | 91.6  | 70.8  | 8.5                                                             | 7.2   | 5.5   |
| P76234          | YeaE         |                      | Monomer               | 110.7                                               | 93.6  | 72.3  | 8.9                                                             | 7.5   | 5.8   |
| P0ACY3          | YeaG         |                      | Monomer               | 78.5                                                | 66.3  | 51.2  | 3.9                                                             | 3.3   | 2.5   |
| P76235          | YeaH         |                      | Monomer               | 92.2                                                | 77.9  | 60.2  | 5.8                                                             | 4.9   | 3.8   |
|                 |              |                      | Monomer               | 87.7                                                | 74.1  | 57.3  | 5.1                                                             | 4.3   | 3.3   |
| P76236          | YeaI         | Cell inner membrane  | Complex with SecB     | 64.1                                                | 52.3  | 41.8  | 2.2                                                             | 1.8   | 1.5   |
|                 |              |                      | Complex with TF (Tig) | 68.8                                                | 58.1  | 44.9  | 2.7                                                             | 2.3   | 1.8   |
|                 |              |                      | Monomer               | 87.4                                                | 73.9  | 57.1  | 5.1                                                             | 4.3   | 3.3   |
| P76237          | YeaJ         | Cell inner membrane  | Complex with SecB     | 64.0                                                | 52.2  | 41.7  | 2.2                                                             | 1.8   | 1.5   |
|                 |              |                      | Complex with TF (Tig) | 68.7                                                | 58.0  | 44.8  | 2.7                                                             | 2.3   | 1.8   |
| P64483          | YeaK         |                      | Monomer               | 137.5                                               | 116.1 | 89.7  | 14.5                                                            | 12.2  | 9.4   |
|                 |              |                      | Monomer               | 146.2                                               | 123.5 | 95.4  | 16.5                                                            | 14.0  | 10.8  |
| P0ACY6          | YeaL         | Cell membrane        | Complex with SecB     | 74.8                                                | 61.1  | 48.8  | 3.4                                                             | 2.8   | 2.2   |
|                 |              |                      | Complex with TF (Tig) | 83.6                                                | 70.6  | 54.6  | 4.5                                                             | 3.8   | 2.9   |
| P76241          | YeaM         |                      | Monomer               | 111.3                                               | 94.1  | 72.7  | 9.0                                                             | 7.6   | 5.9   |
|                 |              |                      | Monomer               | 99.0                                                | 83.7  | 64.6  | 6.8                                                             | 5.8   | 4.5   |
| P76242          | YeaN         | Cell inner membrane  | Complex with SecB     | 67.3                                                | 55.0  | 43.9  | 2.6                                                             | 2.1   | 1.7   |
|                 |              |                      | Complex with TF (Tig) | 73.1                                                | 61.8  | 47.7  | 3.2                                                             | 2.7   | 2.1   |
| P76243          | YeaO         |                      | Monomer               | 153.9                                               | 130.0 | 100.4 | 18.4                                                            | 15.6  | 12.0  |
|                 |              |                      | Monomer               | 101.7                                               | 85.9  | 66.3  | 7.3                                                             | 6.2   | 4.8   |
| P76245          | YeaP         |                      | Homodimer             | 77.5                                                | 63.3  | 50.6  | 3.7                                                             | 3.0   | 2.4   |
|                 |              |                      | Monomer               | 182.4                                               | 154.1 | 119.0 | 26.2                                                            | 22.1  | 17.1  |
| P64485          | YeaQ         | Cell membrane        | Complex with SecB     | 77.2                                                | 63.1  | 50.4  | 3.7                                                             | 3.0   | 2.4   |
|                 |              |                      | Complex with TF (Tig) | 87.3                                                | 73.7  | 57.0  | 5.0                                                             | 4.3   | 3.3   |

| UniProtKB A. N. | Protein name | Subcellular location | Subunit                 | $D_0 \left( \frac{\mu\text{m}^2}{\text{s}} \right)$ |       |       | $D_{\text{cyto}} \left( \frac{\mu\text{m}^2}{\text{s}} \right)$ |       |       |
|-----------------|--------------|----------------------|-------------------------|-----------------------------------------------------|-------|-------|-----------------------------------------------------------------|-------|-------|
|                 |              |                      |                         | 310 K                                               | 303 K | 293 K | 310 K                                                           | 303 K | 293 K |
| P64488          | YeaR         |                      | Monomer                 | 152.9                                               | 129.2 | 99.8  | 18.2                                                            | 15.4  | 11.9  |
| P0ABD1          | YeaV         | Cell inner membrane  | Monomer                 | 89.8                                                | 75.9  | 58.6  | 5.4                                                             | 4.6   | 3.5   |
|                 |              |                      | Complex with SecB       | 64.7                                                | 52.9  | 42.2  | 2.3                                                             | 1.9   | 1.5   |
|                 |              |                      | Complex with TF (Tig)   | 69.7                                                | 58.9  | 45.5  | 2.8                                                             | 2.4   | 1.8   |
| P0ABR7          | YeaW         |                      | Monomer                 | 97.8                                                | 82.6  | 63.8  | 6.6                                                             | 5.6   | 4.3   |
|                 |              |                      | Heterodimer (YeaW–YeaX) | 77.0                                                | 65.1  | 50.3  | 3.7                                                             | 3.1   | 2.4   |
| P76254          | YeaX         |                      | Monomer                 | 104.8                                               | 88.5  | 68.4  | 7.8                                                             | 6.6   | 5.1   |
|                 |              |                      | Heterodimer (YeaW–YeaX) | 77.0                                                | 65.1  | 50.3  | 3.7                                                             | 3.1   | 2.4   |
| P0AA91          | YeaY         | Cell membrane        | Monomer                 | 129.2                                               | 109.1 | 84.3  | 12.6                                                            | 10.7  | 8.2   |
|                 |              |                      | Complex with SecB       | 72.9                                                | 59.6  | 47.6  | 3.2                                                             | 2.6   | 2.1   |
|                 |              |                      | Complex with TF (Tig)   | 80.9                                                | 68.3  | 52.8  | 4.2                                                             | 3.5   | 2.7   |
| P76256          | YeaZ         |                      | Monomer                 | 120.1                                               | 101.5 | 78.4  | 10.7                                                            | 9.1   | 7.0   |
| P0AFS9          | YebA         | Cell membrane        | Monomer                 | 92.5                                                | 78.1  | 60.4  | 5.8                                                             | 4.9   | 3.8   |
|                 |              |                      | Complex with SecB       | 65.5                                                | 53.5  | 42.8  | 2.4                                                             | 2.0   | 1.6   |
|                 |              |                      | Complex with TF (Tig)   | 70.7                                                | 59.8  | 46.2  | 2.9                                                             | 2.5   | 1.9   |
| P24238          | YebB         |                      | Monomer                 | 125.1                                               | 105.7 | 81.6  | 11.8                                                            | 9.9   | 7.7   |
| P0A8A0          | YebC         |                      | Monomer                 | 117.9                                               | 99.6  | 76.9  | 10.3                                                            | 8.7   | 6.7   |
| P33218          | YebE         | Cell inner membrane  | Monomer                 | 123.0                                               | 103.9 | 80.3  | 11.3                                                            | 9.6   | 7.4   |
|                 |              |                      | Complex with SecB       | 72.0                                                | 58.9  | 47.0  | 3.1                                                             | 2.5   | 2.0   |
|                 |              |                      | Complex with TF (Tig)   | 79.6                                                | 67.3  | 52.0  | 4.0                                                             | 3.4   | 2.6   |
| P33219          | YebF         | Secreted             | Monomer                 | 155.8                                               | 131.7 | 101.7 | 18.9                                                            | 16.0  | 12.4  |
|                 |              |                      | Complex with SecB       | 75.6                                                | 61.8  | 49.3  | 3.5                                                             | 2.9   | 2.3   |
|                 |              |                      | Complex with TF (Tig)   | 84.8                                                | 71.7  | 55.4  | 4.7                                                             | 4.0   | 3.1   |
| P0ACY9          | YebG         |                      | Monomer                 | 167.9                                               | 141.8 | 109.6 | 22.1                                                            | 18.7  | 14.4  |
| P76264          | YebN         | Cell inner membrane  | Monomer                 | 131.2                                               | 110.8 | 85.6  | 13.1                                                            | 11.0  | 8.5   |
|                 |              |                      | Complex with SecB       | 73.2                                                | 59.8  | 47.7  | 3.2                                                             | 2.6   | 2.1   |
|                 |              |                      | Complex with TF (Tig)   | 81.2                                                | 68.6  | 53.0  | 4.2                                                             | 3.5   | 2.7   |
| P64499          | YebO         | Cell membrane        | Monomer                 | 167.4                                               | 141.5 | 109.3 | 22.0                                                            | 18.6  | 14.4  |
|                 |              |                      | Complex with SecB       | 76.4                                                | 62.4  | 49.8  | 3.6                                                             | 2.9   | 2.3   |
|                 |              |                      | Complex with TF (Tig)   | 86.0                                                | 72.7  | 56.1  | 4.9                                                             | 4.1   | 3.2   |
| P76269          | YebQ         | Cell inner membrane  | Monomer                 | 93.2                                                | 78.7  | 60.8  | 5.9                                                             | 5.0   | 3.9   |



| UniProtKB A. N. | Protein name | Subcellular location | Subunit               | $D_0 \left( \frac{\mu\text{m}^2}{\text{s}} \right)$ |       |       | $D_{\text{cyto}} \left( \frac{\mu\text{m}^2}{\text{s}} \right)$ |       |       |
|-----------------|--------------|----------------------|-----------------------|-----------------------------------------------------|-------|-------|-----------------------------------------------------------------|-------|-------|
|                 |              |                      |                       | 310 K                                               | 303 K | 293 K | 310 K                                                           | 303 K | 293 K |
|                 |              |                      | Complex with SecB     | 65.7                                                | 53.7  | 42.9  | 2.4                                                             | 2.0   | 1.6   |
|                 |              |                      | Complex with TF (Tig) | 71.0                                                | 60.0  | 46.3  | 3.0                                                             | 2.5   | 1.9   |
| P76270          | YebR         |                      | Monomer               | 136.7                                               | 115.4 | 89.2  | 14.3                                                            | 12.1  | 9.3   |
|                 |              |                      | Monomer               | 93.1                                                | 78.6  | 60.7  | 5.9                                                             | 5.0   | 3.8   |
| P0AD03          | YebS         | Cell inner membrane  | Complex with SecB     | 65.7                                                | 53.7  | 42.9  | 2.4                                                             | 2.0   | 1.6   |
|                 |              |                      | Complex with TF (Tig) | 71.0                                                | 59.9  | 46.3  | 3.0                                                             | 2.5   | 1.9   |
|                 |              |                      | Monomer               | 71.4                                                | 60.3  | 46.6  | 3.0                                                             | 2.5   | 2.0   |
| P76272          | YebT         | Membrane             | Complex with SecB     | 57.6                                                | 47.1  | 37.6  | 1.7                                                             | 1.4   | 1.1   |
|                 |              |                      | Complex with TF (Tig) | 60.8                                                | 51.3  | 39.7  | 1.9                                                             | 1.6   | 1.3   |
| P64503          | YebV         |                      | Monomer               | 181.8                                               | 153.6 | 118.6 | 26.0                                                            | 22.0  | 17.0  |
| P76275          | YebW         |                      | Monomer               | 195.0                                               | 164.7 | 127.3 | 29.9                                                            | 25.3  | 19.5  |
| P64506          | YebY         |                      | Monomer               | 158.7                                               | 134.1 | 103.5 | 19.7                                                            | 16.6  | 12.8  |
|                 |              |                      | Monomer               | 108.7                                               | 91.8  | 70.9  | 8.5                                                             | 7.2   | 5.6   |
| P76278          | YebZ         | Cell inner membrane  | Complex with SecB     | 69.5                                                | 56.8  | 45.4  | 2.8                                                             | 2.3   | 1.8   |
|                 |              |                      | Complex with TF (Tig) | 76.1                                                | 64.3  | 49.6  | 3.6                                                             | 3.0   | 2.3   |
| P0AD05          | YecA         |                      | Monomer               | 120.4                                               | 101.7 | 78.6  | 10.8                                                            | 9.1   | 7.0   |
|                 |              |                      | Monomer               | 115.8                                               | 97.8  | 75.5  | 9.9                                                             | 8.3   | 6.4   |
| P37774          | YecC         | Cell inner membrane  | Complex with SecB     | 70.9                                                | 57.9  | 46.2  | 2.9                                                             | 2.4   | 1.9   |
|                 |              |                      | Complex with TF (Tig) | 78.0                                                | 65.9  | 50.9  | 3.8                                                             | 3.2   | 2.5   |
| P0ADI7          | YecD         |                      | Monomer               | 130.3                                               | 110.1 | 85.0  | 12.9                                                            | 10.9  | 8.4   |
| P37348          | YecE         |                      | Monomer               | 110.1                                               | 93.0  | 71.8  | 8.8                                                             | 7.4   | 5.7   |
| P0AD07          | YecF         |                      | Monomer               | 186.1                                               | 157.2 | 121.5 | 27.3                                                            | 23.0  | 17.8  |
| P46887          | YecH         |                      | Monomer               | 182.8                                               | 154.4 | 119.3 | 26.3                                                            | 22.2  | 17.2  |
| P0AD10          | YecJ         |                      | Monomer               | 178.8                                               | 151.1 | 116.7 | 25.2                                                            | 21.3  | 16.4  |
| P52007          | YecM         |                      | Monomer               | 128.5                                               | 108.6 | 83.8  | 12.5                                                            | 10.5  | 8.1   |
|                 |              |                      | Monomer               | 146.3                                               | 123.6 | 95.5  | 16.6                                                            | 14.0  | 10.8  |
| P64515          | YecN         | Cell inner membrane  | Complex with SecB     | 74.8                                                | 61.1  | 48.8  | 3.4                                                             | 2.8   | 2.2   |
|                 |              |                      | Complex with TF (Tig) | 83.6                                                | 70.7  | 54.6  | 4.5                                                             | 3.8   | 3.0   |
| P76308          | YecR         |                      | Monomer               | 162.0                                               | 136.9 | 105.7 | 20.5                                                            | 17.3  | 13.4  |
|                 |              |                      | Monomer               | 120.8                                               | 102.1 | 78.9  | 10.9                                                            | 9.2   | 7.1   |
| P0AFT2          | YecS         | Cell inner membrane  | Complex with SecB     | 71.7                                                | 58.6  | 46.8  | 3.0                                                             | 2.5   | 2.0   |

| UniProtKB A. N. | Protein name | Subcellular location | Subunit               | $D_0 \left( \frac{\mu\text{m}^2}{\text{s}} \right)$ |       |       | $D_{\text{cyto}} \left( \frac{\mu\text{m}^2}{\text{s}} \right)$ |       |       |
|-----------------|--------------|----------------------|-----------------------|-----------------------------------------------------|-------|-------|-----------------------------------------------------------------|-------|-------|
|                 |              |                      |                       | 310 K                                               | 303 K | 293 K | 310 K                                                           | 303 K | 293 K |
|                 |              |                      | Complex with TF (Tig) | 79.1                                                | 66.9  | 51.6  | 3.9                                                             | 3.3   | 2.6   |
| P76296          | YecT         |                      | Monomer               | 134.5                                               | 113.6 | 87.7  | 13.8                                                            | 11.7  | 9.0   |
| P0AA70          | YedA         | Cell inner membrane  | Monomer               | 109.1                                               | 92.2  | 71.2  | 8.6                                                             | 7.3   | 5.6   |
|                 |              |                      | Complex with SecB     | 69.6                                                | 56.9  | 45.4  | 2.8                                                             | 2.3   | 1.8   |
|                 |              |                      | Complex with TF (Tig) | 76.2                                                | 64.4  | 49.7  | 3.6                                                             | 3.0   | 2.3   |
| P31063          | YedD         | Cell membrane        | Monomer               | 147.2                                               | 124.4 | 96.1  | 16.8                                                            | 14.2  | 11.0  |
|                 |              |                      | Complex with SecB     | 74.9                                                | 61.2  | 48.9  | 3.4                                                             | 2.8   | 2.2   |
|                 |              |                      | Complex with TF (Tig) | 83.8                                                | 70.8  | 54.7  | 4.5                                                             | 3.8   | 3.0   |
| P31064          | YedE         | Cell inner membrane  | Monomer               | 96.1                                                | 81.2  | 62.7  | 6.4                                                             | 5.4   | 4.2   |
|                 |              |                      | Complex with SecB     | 66.6                                                | 54.4  | 43.4  | 2.5                                                             | 2.0   | 1.6   |
|                 |              |                      | Complex with TF (Tig) | 72.1                                                | 60.9  | 47.0  | 3.1                                                             | 2.6   | 2.0   |
| P0AA31          | YedF         |                      | Monomer               | 182.7                                               | 154.3 | 119.2 | 26.3                                                            | 22.2  | 17.1  |
| P46125          | YedI         | Cell inner membrane  | Monomer               | 109.1                                               | 92.2  | 71.2  | 8.6                                                             | 7.3   | 5.6   |
|                 |              |                      | Complex with SecB     | 69.6                                                | 56.9  | 45.4  | 2.8                                                             | 2.3   | 1.8   |
|                 |              |                      | Complex with TF (Tig) | 76.2                                                | 64.4  | 49.7  | 3.6                                                             | 3.0   | 2.3   |
| P46144          | YedJ         |                      | Monomer               | 118.8                                               | 100.4 | 77.5  | 10.5                                                            | 8.8   | 6.8   |
| P76318          | YedK         |                      | Monomer               | 120.5                                               | 101.8 | 78.6  | 10.8                                                            | 9.1   | 7.1   |
| P76319          | YedL         |                      | Monomer               | 137.3                                               | 116.0 | 89.6  | 14.4                                                            | 12.2  | 9.4   |
| P76322          | YedM         |                      | Monomer               | 153.8                                               | 130.0 | 100.4 | 18.4                                                            | 15.6  | 12.0  |
| P76321          | YedN         |                      | Monomer               | 131.6                                               | 111.2 | 85.9  | 13.2                                                            | 11.1  | 8.6   |
| P76329          | YedP         | Cytoplasm            | Monomer               | 111.5                                               | 94.2  | 72.8  | 9.1                                                             | 7.6   | 5.9   |
| P76330          | YedQ         | Cell inner membrane  | Monomer               | 83.2                                                | 70.3  | 54.3  | 4.5                                                             | 3.8   | 2.9   |
|                 |              |                      | Complex with SecB     | 62.5                                                | 51.0  | 40.8  | 2.1                                                             | 1.7   | 1.4   |
|                 |              |                      | Complex with TF (Tig) | 66.8                                                | 56.4  | 43.6  | 2.5                                                             | 2.1   | 1.6   |
| P76334          | YedR         | Cell inner membrane  | Monomer               | 151.9                                               | 128.3 | 99.1  | 17.9                                                            | 15.2  | 11.7  |
|                 |              |                      | Complex with SecB     | 75.3                                                | 61.5  | 49.1  | 3.5                                                             | 2.8   | 2.3   |
|                 |              |                      | Complex with TF (Tig) | 84.4                                                | 71.3  | 55.0  | 4.6                                                             | 3.9   | 3.0   |
| P76335          | YedS         | Cell outer membrane  | Monomer               | 97.4                                                | 82.3  | 63.6  | 6.6                                                             | 5.6   | 4.3   |
|                 |              |                      | Complex with SecB     | 66.9                                                | 54.6  | 43.7  | 2.5                                                             | 2.1   | 1.6   |
|                 |              |                      | Complex with TF (Tig) | 72.5                                                | 61.3  | 47.3  | 3.1                                                             | 2.6   | 2.0   |
| P76339          | YedV         | Cell inner membrane  | Monomer               | 91.2                                                | 77.0  | 59.5  | 5.6                                                             | 4.7   | 3.7   |

| UniProtKB A. N. | Protein name | Subcellular location | Subunit               | $D_0 \left( \frac{\mu\text{m}^2}{\text{s}} \right)$ |       |       | $D_{\text{cyto}} \left( \frac{\mu\text{m}^2}{\text{s}} \right)$ |       |       |
|-----------------|--------------|----------------------|-----------------------|-----------------------------------------------------|-------|-------|-----------------------------------------------------------------|-------|-------|
|                 |              |                      |                       | 310 K                                               | 303 K | 293 K | 310 K                                                           | 303 K | 293 K |
|                 |              |                      | Complex with SecB     | 65.1                                                | 53.2  | 42.5  | 2.4                                                             | 1.9   | 1.5   |
|                 |              |                      | Complex with TF (Tig) | 70.2                                                | 59.3  | 45.8  | 2.9                                                             | 2.4   | 1.9   |
| P76340          | YedW         | Cytoplasm            | Monomer               | 120.4                                               | 101.7 | 78.6  | 10.8                                                            | 9.1   | 7.0   |
|                 |              |                      | Monomer               | 102.9                                               | 86.9  | 67.1  | 7.5                                                             | 6.3   | 4.9   |
| P76342          | YedY         | Periplasm            | Complex with SecB     | 68.3                                                | 55.8  | 44.5  | 2.7                                                             | 2.2   | 1.7   |
|                 |              |                      | Complex with TF (Tig) | 74.4                                                | 62.8  | 48.5  | 3.3                                                             | 2.8   | 2.2   |
|                 |              |                      | Monomer               | 122.3                                               | 103.3 | 79.8  | 11.2                                                            | 9.4   | 7.3   |
| P76343          | YedZ         | Cell inner membrane  | Complex with SecB     | 71.9                                                | 58.8  | 46.9  | 3.1                                                             | 2.5   | 2.0   |
|                 |              |                      | Complex with TF (Tig) | 79.5                                                | 67.1  | 51.9  | 4.0                                                             | 3.4   | 2.6   |
|                 |              |                      | Monomer               | 100.2                                               | 84.7  | 65.4  | 7.0                                                             | 6.0   | 4.6   |
| P33011          | YeeA         | Cell inner membrane  | Complex with SecB     | 67.6                                                | 55.2  | 44.1  | 2.6                                                             | 2.1   | 1.7   |
|                 |              |                      | Complex with TF (Tig) | 73.5                                                | 62.1  | 48.0  | 3.2                                                             | 2.7   | 2.1   |
| P33014          | YeeD         |                      | Monomer               | 186.9                                               | 157.9 | 122.0 | 27.5                                                            | 23.2  | 18.0  |
|                 |              |                      | Monomer               | 102.1                                               | 86.3  | 66.6  | 7.4                                                             | 6.2   | 4.8   |
| P33015          | YeeE         | Cell inner membrane  | Complex with SecB     | 68.1                                                | 55.6  | 44.4  | 2.6                                                             | 2.2   | 1.7   |
|                 |              |                      | Complex with TF (Tig) | 74.1                                                | 62.6  | 48.4  | 3.3                                                             | 2.8   | 2.2   |
|                 |              |                      | Monomer               | 92.1                                                | 77.8  | 60.1  | 5.7                                                             | 4.9   | 3.8   |
| P0AA47          | YeeF         | Cell inner membrane  | Complex with SecB     | 65.4                                                | 53.4  | 42.7  | 2.4                                                             | 1.9   | 1.6   |
|                 |              |                      | Complex with TF (Tig) | 70.6                                                | 59.6  | 46.1  | 2.9                                                             | 2.5   | 1.9   |
| P76347          | YeeJ         |                      | Monomer               | 49.0                                                | 41.4  | 31.9  | 1.0                                                             | 0.9   | 0.7   |
| P76349          | YeeL         |                      | Monomer               | 100.8                                               | 85.1  | 65.8  | 7.1                                                             | 6.0   | 4.7   |
| P0A8A2          | YeeN         |                      | Monomer               | 118.9                                               | 100.4 | 77.6  | 10.5                                                            | 8.9   | 6.8   |
|                 |              |                      | Monomer               | 88.9                                                | 75.1  | 58.0  | 5.3                                                             | 4.5   | 3.4   |
| P76352          | YeeO         | Cell inner membrane  | Complex with SecB     | 64.4                                                | 52.6  | 42.1  | 2.3                                                             | 1.9   | 1.5   |
|                 |              |                      | Complex with TF (Tig) | 69.3                                                | 58.6  | 45.2  | 2.8                                                             | 2.3   | 1.8   |
| P76359          | YeeP         |                      | Monomer               | 116.8                                               | 98.6  | 76.2  | 10.1                                                            | 8.5   | 6.6   |
|                 |              |                      | Monomer               | 87.1                                                | 73.6  | 56.8  | 5.0                                                             | 4.2   | 3.3   |
| P76361          | YeeR         | Cell inner membrane  | Complex with SecB     | 63.8                                                | 52.1  | 41.7  | 2.2                                                             | 1.8   | 1.5   |
|                 |              |                      | Complex with TF (Tig) | 68.5                                                | 57.9  | 44.7  | 2.7                                                             | 2.3   | 1.8   |
| P76362          | YeeS         |                      | Monomer               | 141.6                                               | 119.6 | 92.4  | 15.4                                                            | 13.0  | 10.1  |
| P64521          | YeeT         |                      | Monomer               | 184.6                                               | 156.0 | 120.5 | 26.8                                                            | 22.7  | 17.5  |

| UniProtKB A. N. | Protein name | Subcellular location | Subunit               | $D_0 \left( \frac{\mu\text{m}^2}{\text{s}} \right)$ |       |       | $D_{\text{cyto}} \left( \frac{\mu\text{m}^2}{\text{s}} \right)$ |       |       |
|-----------------|--------------|----------------------|-----------------------|-----------------------------------------------------|-------|-------|-----------------------------------------------------------------|-------|-------|
|                 |              |                      |                       | 310 K                                               | 303 K | 293 K | 310 K                                                           | 303 K | 293 K |
| P76364          | YeeU         |                      | Monomer               | 152.6                                               | 128.9 | 99.6  | 18.1                                                            | 15.3  | 11.8  |
| P64526          | YeeW         |                      | Monomer               | 198.9                                               | 168.0 | 129.8 | 31.1                                                            | 26.3  | 20.3  |
| P0A8M6          | YeeX         |                      | Monomer               | 156.7                                               | 132.4 | 102.3 | 19.2                                                            | 16.2  | 12.5  |
| P76369          | YeeY         |                      | Monomer               | 106.6                                               | 90.0  | 69.5  | 8.1                                                             | 6.9   | 5.3   |
| P0AD12          | YeeZ         |                      | Monomer               | 112.6                                               | 95.1  | 73.5  | 9.3                                                             | 7.8   | 6.0   |
| P37749          | YefG         | Cytoplasm            | Monomer               | 102.5                                               | 86.6  | 66.9  | 7.4                                                             | 6.3   | 4.8   |
| P37751          | YefI         | Cell inner membrane  | Monomer               | 97.2                                                | 82.1  | 63.4  | 6.6                                                             | 5.5   | 4.3   |
|                 |              |                      | Complex with SecB     | 66.8                                                | 54.6  | 43.6  | 2.5                                                             | 2.1   | 1.6   |
|                 |              |                      | Complex with TF (Tig) | 72.5                                                | 61.2  | 47.3  | 3.1                                                             | 2.6   | 2.0   |
| P69346          | YefM         | other                | Monomer               | 177.4                                               | 149.9 | 115.8 | 24.8                                                            | 20.9  | 16.2  |
|                 |              |                      | Complex with SecB     | 77.0                                                | 62.9  | 50.2  | 3.7                                                             | 3.0   | 2.4   |
|                 |              |                      | Complex with TF (Tig) | 86.9                                                | 73.4  | 56.7  | 5.0                                                             | 4.2   | 3.2   |
| P36928          | YegD         |                      | Monomer               | 92.3                                                | 77.9  | 60.2  | 5.8                                                             | 4.9   | 3.8   |
| P38097          | YegE         |                      | Monomer               | 64.3                                                | 54.3  | 42.0  | 2.3                                                             | 1.9   | 1.5   |
|                 |              |                      | Homodimer             | 49.0                                                | 40.0  | 32.0  | 1.0                                                             | 0.9   | 0.7   |
| P76389          | YegH         | Cell membrane        | Monomer               | 85.8                                                | 72.5  | 56.0  | 4.8                                                             | 4.1   | 3.1   |
|                 |              |                      | Complex with SecB     | 63.4                                                | 51.8  | 41.4  | 2.2                                                             | 1.8   | 1.4   |
|                 |              |                      | Complex with TF (Tig) | 68.0                                                | 57.4  | 44.4  | 2.6                                                             | 2.2   | 1.7   |
| P76393          | YegI         |                      | Monomer               | 79.7                                                | 67.4  | 52.0  | 4.0                                                             | 3.4   | 2.6   |
| P76394          | YegJ         |                      | Monomer               | 138.8                                               | 117.2 | 90.5  | 14.8                                                            | 12.5  | 9.6   |
| P76395          | YegK         |                      | Monomer               | 116.5                                               | 98.4  | 76.0  | 10.0                                                            | 8.5   | 6.5   |
| P76396          | YegL         |                      | Monomer               | 122.0                                               | 103.0 | 79.6  | 11.1                                                            | 9.4   | 7.2   |
| P76402          | YegP         |                      | Monomer               | 160.5                                               | 135.6 | 104.7 | 20.1                                                            | 17.0  | 13.1  |
| P76403          | YegQ         |                      | Monomer               | 91.0                                                | 76.8  | 59.4  | 5.6                                                             | 4.7   | 3.6   |
| P76406          | YegR         |                      | Monomer               | 163.5                                               | 138.1 | 106.7 | 20.9                                                            | 17.7  | 13.7  |
| P76407          | YegS         | Cytoplasm            | Monomer               | 109.3                                               | 92.3  | 71.3  | 8.6                                                             | 7.3   | 5.6   |
| P76417          | YegT         | Cell inner membrane  | Monomer               | 93.8                                                | 79.2  | 61.2  | 6.0                                                             | 5.1   | 3.9   |
|                 |              |                      | Complex with SecB     | 65.9                                                | 53.8  | 43.0  | 2.4                                                             | 2.0   | 1.6   |
|                 |              |                      | Complex with TF (Tig) | 71.2                                                | 60.2  | 46.5  | 3.0                                                             | 2.5   | 1.9   |
| P76418          | YegU         |                      | Monomer               | 104.8                                               | 88.6  | 68.4  | 7.8                                                             | 6.6   | 5.1   |
| P76419          | YegV         |                      | Monomer               | 106.3                                               | 89.8  | 69.4  | 8.1                                                             | 6.8   | 5.3   |

| UniProtKB A. N. | Protein name | Subcellular location | Subunit               | $D_0 \left( \frac{\mu\text{m}^2}{\text{s}} \right)$ |       |       | $D_{\text{cyto}} \left( \frac{\mu\text{m}^2}{\text{s}} \right)$ |       |       |
|-----------------|--------------|----------------------|-----------------------|-----------------------------------------------------|-------|-------|-----------------------------------------------------------------|-------|-------|
|                 |              |                      |                       | 310 K                                               | 303 K | 293 K | 310 K                                                           | 303 K | 293 K |
| P0ACM5          | YegW         |                      | Monomer               | 114.8                                               | 97.0  | 74.9  | 9.7                                                             | 8.2   | 6.3   |
| P76421          | YegX         |                      | Monomer               | 109.9                                               | 92.8  | 71.7  | 8.7                                                             | 7.4   | 5.7   |
| P33340          | YehA         |                      | Monomer               | 103.4                                               | 87.4  | 67.5  | 7.6                                                             | 6.4   | 5.0   |
| P33341          | YehB         | Cell outer membrane  | Monomer               | 72.2                                                | 61.0  | 47.1  | 3.1                                                             | 2.6   | 2.0   |
|                 |              |                      | Complex with SecB     | 58.0                                                | 47.4  | 37.8  | 1.7                                                             | 1.4   | 1.1   |
|                 |              |                      | Complex with TF (Tig) | 61.2                                                | 51.7  | 40.0  | 2.0                                                             | 1.7   | 1.3   |
| P33342          | YehC         | Periplasm            | Monomer               | 117.6                                               | 99.3  | 76.7  | 10.2                                                            | 8.6   | 6.7   |
|                 |              |                      | Complex with SecB     | 71.2                                                | 58.1  | 46.4  | 3.0                                                             | 2.4   | 1.9   |
|                 |              |                      | Complex with TF (Tig) | 78.4                                                | 66.2  | 51.2  | 3.8                                                             | 3.2   | 2.5   |
| P33343          | YehD         |                      | Monomer               | 134.0                                               | 113.2 | 87.4  | 13.7                                                            | 11.6  | 8.9   |
| P33344          | YehE         |                      | Monomer               | 171.6                                               | 145.0 | 112.0 | 23.1                                                            | 19.5  | 15.1  |
| P33345          | YehH         |                      | Monomer               | 61.2                                                | 51.7  | 39.9  | 2.0                                                             | 1.7   | 1.3   |
| P33346          | YehI         |                      | Monomer               | 61.6                                                | 52.1  | 40.2  | 2.0                                                             | 1.7   | 1.3   |
| P33347          | YehK         |                      | Monomer               | 157.6                                               | 133.1 | 102.8 | 19.4                                                            | 16.4  | 12.6  |
| P33348          | YehL         |                      | Monomer               | 100.5                                               | 84.9  | 65.6  | 7.1                                                             | 6.0   | 4.6   |
| P33349          | YehM         |                      | Monomer               | 75.1                                                | 63.5  | 49.0  | 3.4                                                             | 2.9   | 2.2   |
| P33352          | YehP         |                      | Monomer               | 98.2                                                | 82.9  | 64.1  | 6.7                                                             | 5.7   | 4.4   |
| P33353          | YehQ         |                      | Monomer               | 81.5                                                | 68.9  | 53.2  | 4.2                                                             | 3.6   | 2.8   |
| P33354          | YehR         | Cell membrane        | Monomer               | 141.5                                               | 119.5 | 92.3  | 15.4                                                            | 13.0  | 10.1  |
|                 |              |                      | Complex with SecB     | 74.3                                                | 60.7  | 48.5  | 3.3                                                             | 2.7   | 2.2   |
|                 |              |                      | Complex with TF (Tig) | 82.9                                                | 70.1  | 54.1  | 4.4                                                             | 3.7   | 2.9   |
| P33355          | YehS         |                      | Monomer               | 137.1                                               | 115.8 | 89.5  | 14.4                                                            | 12.2  | 9.4   |
| P0AFT5          | YehT         |                      | Monomer               | 116.2                                               | 98.2  | 75.8  | 10.0                                                            | 8.4   | 6.5   |
| P0AD14          | YehU         | Cell inner membrane  | Monomer               | 84.3                                                | 71.2  | 55.0  | 4.6                                                             | 3.9   | 3.0   |
|                 |              |                      | Complex with SecB     | 62.9                                                | 51.4  | 41.0  | 2.1                                                             | 1.7   | 1.4   |
|                 |              |                      | Complex with TF (Tig) | 67.3                                                | 56.9  | 43.9  | 2.6                                                             | 2.2   | 1.7   |
| P33359          | YehW         | Cell inner membrane  | Monomer               | 119.5                                               | 101.0 | 78.0  | 10.6                                                            | 9.0   | 6.9   |
|                 |              |                      | Complex with SecB     | 71.5                                                | 58.4  | 46.7  | 3.0                                                             | 2.5   | 2.0   |
|                 |              |                      | Complex with TF (Tig) | 78.8                                                | 66.6  | 51.4  | 3.9                                                             | 3.3   | 2.5   |
| P33360          | YehX         |                      | Monomer               | 106.3                                               | 89.8  | 69.3  | 8.1                                                             | 6.8   | 5.3   |
| P33361          | YehY         | Cell inner membrane  | Monomer               | 99.1                                                | 83.7  | 64.7  | 6.9                                                             | 5.8   | 4.5   |

| UniProtKB A. N. | Protein name | Subcellular location | Subunit                                                | $D_0 \left( \frac{\mu\text{m}^2}{\text{s}} \right)$ |       |       | $D_{\text{cyto}} \left( \frac{\mu\text{m}^2}{\text{s}} \right)$ |       |       |
|-----------------|--------------|----------------------|--------------------------------------------------------|-----------------------------------------------------|-------|-------|-----------------------------------------------------------------|-------|-------|
|                 |              |                      |                                                        | 310 K                                               | 303 K | 293 K | 310 K                                                           | 303 K | 293 K |
|                 |              |                      | Complex with SecB                                      | 67.3                                                | 55.0  | 43.9  | 2.6                                                             | 2.1   | 1.7   |
|                 |              |                      | Complex with TF (Tig)                                  | 73.1                                                | 61.8  | 47.7  | 3.2                                                             | 2.7   | 2.1   |
| P25889          | YeiA         |                      | Monomer                                                | 95.6                                                | 80.8  | 62.4  | 6.3                                                             | 5.3   | 4.1   |
|                 |              |                      | Heterotetramer (YeiA <sub>2</sub> –YeiT <sub>2</sub> ) | 55.7                                                | 47.1  | 36.4  | 1.5                                                             | 1.3   | 1.0   |
| P25747          | YeiB         | Cell membrane        | Monomer                                                | 97.0                                                | 82.0  | 63.3  | 6.5                                                             | 5.5   | 4.3   |
|                 |              |                      | Complex with SecB                                      | 66.8                                                | 54.6  | 43.6  | 2.5                                                             | 2.1   | 1.6   |
|                 |              |                      | Complex with TF (Tig)                                  | 72.4                                                | 61.2  | 47.3  | 3.1                                                             | 2.6   | 2.0   |
| P0ACR4          | YeiE         |                      | Monomer                                                | 108.4                                               | 91.6  | 70.7  | 8.5                                                             | 7.2   | 5.5   |
| P33018          | YeiG         |                      | Monomer                                                | 110.4                                               | 93.2  | 72.0  | 8.8                                                             | 7.5   | 5.8   |
|                 |              |                      | Homotetramer                                           | 64.1                                                | 52.4  | 41.8  | 2.2                                                             | 1.8   | 1.5   |
| P62723          | YeiH         | Cell inner membrane  | Monomer                                                | 103.4                                               | 87.4  | 67.5  | 7.6                                                             | 6.4   | 5.0   |
|                 |              |                      | Complex with SecB                                      | 68.4                                                | 55.9  | 44.6  | 2.7                                                             | 2.2   | 1.7   |
|                 |              |                      | Complex with TF (Tig)                                  | 74.5                                                | 63.0  | 48.6  | 3.4                                                             | 2.8   | 2.2   |
| P33020          | YeiI         |                      | Monomer                                                | 100.5                                               | 84.9  | 65.6  | 7.1                                                             | 6.0   | 4.6   |
| P0A6N8          | YeiP         |                      | Monomer                                                | 127.7                                               | 107.9 | 83.3  | 12.3                                                            | 10.4  | 8.0   |
| P33029          | YeiQ         |                      | Monomer                                                | 89.0                                                | 75.2  | 58.1  | 5.3                                                             | 4.5   | 3.5   |
| P33030          | YeiR         |                      | Monomer                                                | 104.3                                               | 88.1  | 68.1  | 7.7                                                             | 6.5   | 5.1   |
| P64536          | YeiS         | Membrane             | Monomer                                                | 177.8                                               | 150.2 | 116.0 | 24.9                                                            | 21.0  | 16.2  |
|                 |              |                      | Complex with SecB                                      | 77.0                                                | 62.9  | 50.2  | 3.7                                                             | 3.0   | 2.4   |
|                 |              |                      | Complex with TF (Tig)                                  | 86.9                                                | 73.4  | 56.7  | 5.0                                                             | 4.2   | 3.3   |
| P76440          | YeiT         |                      | Monomer                                                | 96.2                                                | 81.3  | 62.8  | 6.4                                                             | 5.4   | 4.2   |
|                 |              |                      | Heterotetramer (YeiA <sub>2</sub> –YeiT <sub>2</sub> ) | 55.7                                                | 47.1  | 36.4  | 1.5                                                             | 1.3   | 1.0   |
| P76445          | YeiU         | Cell inner membrane  | Monomer                                                | 117.3                                               | 99.1  | 76.5  | 10.2                                                            | 8.6   | 6.6   |
|                 |              |                      | Complex with SecB                                      | 71.1                                                | 58.1  | 46.4  | 3.0                                                             | 2.4   | 1.9   |
|                 |              |                      | Complex with TF (Tig)                                  | 78.3                                                | 66.2  | 51.1  | 3.8                                                             | 3.2   | 2.5   |
| P0AFT8          | YeiW         |                      | Monomer                                                | 180.2                                               | 152.2 | 117.6 | 25.5                                                            | 21.6  | 16.7  |
| P33913          | YejA         |                      | Monomer                                                | 80.6                                                | 68.1  | 52.6  | 4.1                                                             | 3.5   | 2.7   |
| P0AFU0          | YejB         | Cell inner membrane  | Monomer                                                | 99.8                                                | 84.3  | 65.2  | 7.0                                                             | 5.9   | 4.6   |
|                 |              |                      | Complex with SecB                                      | 67.5                                                | 55.2  | 44.1  | 2.6                                                             | 2.1   | 1.7   |
|                 |              |                      | Complex with TF (Tig)                                  | 73.4                                                | 62.0  | 47.9  | 3.2                                                             | 2.7   | 2.1   |
| P33915          | YejE         | Cell inner membrane  | Monomer                                                | 102.1                                               | 86.3  | 66.6  | 7.4                                                             | 6.2   | 4.8   |

| UniProtKB A. N. | Protein name | Subcellular location    | Subunit               | $D_0 \left( \frac{\mu\text{m}^2}{\text{s}} \right)$ |       |       | $D_{\text{cyto}} \left( \frac{\mu\text{m}^2}{\text{s}} \right)$ |       |       |
|-----------------|--------------|-------------------------|-----------------------|-----------------------------------------------------|-------|-------|-----------------------------------------------------------------|-------|-------|
|                 |              |                         |                       | 310 K                                               | 303 K | 293 K | 310 K                                                           | 303 K | 293 K |
|                 |              |                         | Complex with SecB     | 68.1                                                | 55.6  | 44.4  | 2.6                                                             | 2.2   | 1.7   |
|                 |              |                         | Complex with TF (Tig) | 74.1                                                | 62.6  | 48.4  | 3.3                                                             | 2.8   | 2.2   |
| P33916          | YejF         |                         | Monomer               | 86.2                                                | 72.8  | 56.2  | 4.9                                                             | 4.1   | 3.2   |
| P0AD21          | YejG         |                         | Monomer               | 157.9                                               | 133.4 | 103.1 | 19.5                                                            | 16.5  | 12.7  |
| P33919          | YejH         |                         | Monomer               | 82.1                                                | 69.4  | 53.6  | 4.3                                                             | 3.6   | 2.8   |
|                 |              | Cytoplasm ><br>nucleoid |                       |                                                     |       |       |                                                                 |       |       |
| P33920          | YejK         |                         | Monomer               | 102.4                                               | 86.5  | 66.8  | 7.4                                                             | 6.3   | 4.8   |
| P0AD24          | YejL         |                         | Monomer               | 185.7                                               | 156.9 | 121.2 | 27.1                                                            | 22.9  | 17.7  |
|                 |              |                         | Monomer               | 81.7                                                | 69.0  | 53.3  | 4.3                                                             | 3.6   | 2.8   |
| P0AD27          | YejM         | Cell inner membrane     | Complex with SecB     | 61.9                                                | 50.6  | 40.4  | 2.0                                                             | 1.7   | 1.3   |
|                 |              |                         | Complex with TF (Tig) | 66.1                                                | 55.9  | 43.1  | 2.4                                                             | 2.1   | 1.6   |
|                 |              |                         | Monomer               | 72.5                                                | 61.3  | 47.3  | 3.1                                                             | 2.6   | 2.0   |
| P33924          | YejO         | Cell outer membrane     | Complex with SecB     | 58.1                                                | 47.5  | 37.9  | 1.7                                                             | 1.4   | 1.1   |
|                 |              |                         | Complex with TF (Tig) | 61.4                                                | 51.9  | 40.1  | 2.0                                                             | 1.7   | 1.3   |
| P17994          | YfaA         |                         | Monomer               | 84.0                                                | 71.0  | 54.8  | 4.6                                                             | 3.9   | 3.0   |
| P37014          | YfaD         |                         | Monomer               | 105.7                                               | 89.3  | 69.0  | 8.0                                                             | 6.7   | 5.2   |
| P0ABW3          | YfaE         |                         | Monomer               | 177.5                                               | 150.0 | 115.9 | 24.8                                                            | 20.9  | 16.2  |
| P45505          | YfaH         |                         | Monomer               | 192.9                                               | 163.0 | 125.9 | 29.3                                                            | 24.8  | 19.1  |
| P45508          | YfaL         |                         | Monomer               | 62.9                                                | 53.1  | 41.0  | 2.1                                                             | 1.8   | 1.4   |
| P76462          | YfaP         |                         | Monomer               | 114.7                                               | 96.9  | 74.9  | 9.7                                                             | 8.2   | 6.3   |
| P76463          | YfaQ         |                         | Monomer               | 84.7                                                | 71.5  | 55.2  | 4.7                                                             | 3.9   | 3.0   |
| P76464          | YfaS         |                         | Monomer               | 56.8                                                | 48.0  | 37.1  | 1.6                                                             | 1.4   | 1.1   |
| P76466          | YfaT         |                         | Monomer               | 122.9                                               | 103.8 | 80.2  | 11.3                                                            | 9.5   | 7.4   |
| P77808          | YfaY         |                         | Monomer               | 96.3                                                | 81.4  | 62.9  | 6.4                                                             | 5.4   | 4.2   |
| P76471          | YfaZ         |                         | Monomer               | 135.2                                               | 114.2 | 88.2  | 14.0                                                            | 11.8  | 9.1   |
| P76481          | YfbK         |                         | Monomer               | 83.5                                                | 70.6  | 54.5  | 4.5                                                             | 3.8   | 2.9   |
|                 |              |                         | Monomer               | 104.5                                               | 88.3  | 68.2  | 7.8                                                             | 6.6   | 5.1   |
| P76482          | YfbL         | Membrane                | Complex with SecB     | 68.6                                                | 56.1  | 44.8  | 2.7                                                             | 2.2   | 1.8   |
|                 |              |                         | Complex with TF (Tig) | 74.9                                                | 63.2  | 48.9  | 3.4                                                             | 2.9   | 2.2   |
| P76483          | YfbM         |                         | Monomer               | 134.1                                               | 113.3 | 87.5  | 13.7                                                            | 11.6  | 8.9   |
| P76484          | YfbN         |                         | Monomer               | 115.2                                               | 97.4  | 75.2  | 9.8                                                             | 8.2   | 6.4   |

| UniProtKB A. N. | Protein name | Subcellular location | Subunit               | $D_0 \left( \frac{\mu\text{m}^2}{\text{s}} \right)$ |       |       | $D_{\text{cyto}} \left( \frac{\mu\text{m}^2}{\text{s}} \right)$ |       |       |
|-----------------|--------------|----------------------|-----------------------|-----------------------------------------------------|-------|-------|-----------------------------------------------------------------|-------|-------|
|                 |              |                      |                       | 310 K                                               | 303 K | 293 K | 310 K                                                           | 303 K | 293 K |
| P76485          | YfbO         |                      | Monomer               | 142.9                                               | 120.7 | 93.3  | 15.8                                                            | 13.3  | 10.3  |
| P76486          | YfbP         |                      | Monomer               | 109.0                                               | 92.1  | 71.1  | 8.6                                                             | 7.3   | 5.6   |
| P0A959          | YfbQ         | Cytoplasm            | Monomer               | 95.2                                                | 80.5  | 62.2  | 6.2                                                             | 5.3   | 4.1   |
|                 |              |                      | Homodimer             | 72.6                                                | 59.3  | 47.4  | 3.1                                                             | 2.6   | 2.0   |
| P76491          | YfbR         | Cytoplasm            | Monomer               | 125.1                                               | 105.7 | 81.6  | 11.8                                                            | 9.9   | 7.7   |
|                 |              |                      | Homooligomer          | 81.3                                                | 68.7  | 53.1  | 4.2                                                             | 3.6   | 2.7   |
| P0AFU2          | YfbS         | Cell inner membrane  | Monomer               | 82.4                                                | 69.6  | 53.8  | 4.4                                                             | 3.7   | 2.8   |
|                 |              |                      | Complex with SecB     | 62.2                                                | 50.8  | 40.6  | 2.1                                                             | 1.7   | 1.4   |
|                 |              |                      | Complex with TF (Tig) | 66.4                                                | 56.1  | 43.4  | 2.5                                                             | 2.1   | 1.6   |
| P77625          | YfbT         |                      | Monomer               | 124.4                                               | 105.1 | 81.2  | 11.6                                                            | 9.8   | 7.6   |
| P0A8W8          | YfbU         |                      | Monomer               | 132.7                                               | 112.1 | 86.6  | 13.4                                                            | 11.3  | 8.7   |
| P0A8D9          | YfbV         | Cell inner membrane  | Monomer               | 139.4                                               | 117.8 | 91.0  | 14.9                                                            | 12.6  | 9.7   |
|                 |              |                      | Complex with SecB     | 74.1                                                | 60.5  | 48.4  | 3.3                                                             | 2.7   | 2.2   |
|                 |              |                      | Complex with TF (Tig) | 82.6                                                | 69.8  | 53.9  | 4.4                                                             | 3.7   | 2.9   |
| P0AD30          | YfcA         | Cell inner membrane  | Monomer               | 114.2                                               | 96.5  | 74.5  | 9.6                                                             | 8.1   | 6.2   |
|                 |              |                      | Complex with SecB     | 70.6                                                | 57.7  | 46.1  | 2.9                                                             | 2.4   | 1.9   |
|                 |              |                      | Complex with TF (Tig) | 77.6                                                | 65.5  | 50.6  | 3.7                                                             | 3.2   | 2.4   |
| P39199          | YfcB         |                      | Monomer               | 105.6                                               | 89.2  | 68.9  | 8.0                                                             | 6.7   | 5.2   |
| P39263          | YfcC         | Cell membrane        | Monomer               | 88.6                                                | 74.8  | 57.8  | 5.2                                                             | 4.4   | 3.4   |
|                 |              |                      | Complex with SecB     | 64.3                                                | 52.5  | 42.0  | 2.3                                                             | 1.9   | 1.5   |
|                 |              |                      | Complex with TF (Tig) | 69.2                                                | 58.4  | 45.1  | 2.8                                                             | 2.3   | 1.8   |
| P65556          | YfcD         |                      | Monomer               | 130.5                                               | 110.3 | 85.2  | 12.9                                                            | 10.9  | 8.4   |
| P67095          | YfcE         |                      | Monomer               | 131.2                                               | 110.8 | 85.6  | 13.1                                                            | 11.0  | 8.5   |
| P77544          | YfcF         |                      | Monomer               | 121.8                                               | 102.9 | 79.5  | 11.1                                                            | 9.3   | 7.2   |
| P77526          | YfcG         |                      | Monomer               | 121.4                                               | 102.5 | 79.2  | 11.0                                                            | 9.3   | 7.2   |
| P77775          | YfcH         |                      | Monomer               | 108.4                                               | 91.6  | 70.8  | 8.5                                                             | 7.2   | 5.5   |
| P77768          | YfcI         |                      | Monomer               | 106.6                                               | 90.0  | 69.5  | 8.1                                                             | 6.9   | 5.3   |
| P77549          | YfcJ         | Cell inner membrane  | Monomer               | 99.7                                                | 84.3  | 65.1  | 7.0                                                             | 5.9   | 4.5   |
|                 |              |                      | Complex with SecB     | 67.5                                                | 55.1  | 44.0  | 2.6                                                             | 2.1   | 1.7   |
|                 |              |                      | Complex with TF (Tig) | 73.3                                                | 62.0  | 47.9  | 3.2                                                             | 2.7   | 2.1   |
| P64540          | YfcL         |                      | Monomer               | 172.5                                               | 145.7 | 112.6 | 23.4                                                            | 19.8  | 15.3  |



| UniProtKB A. N. | Protein name | Subcellular location | Subunit               | $D_0 \left( \frac{\mu\text{m}^2}{\text{s}} \right)$ |       |       | $D_{\text{cyto}} \left( \frac{\mu\text{m}^2}{\text{s}} \right)$ |       |       |
|-----------------|--------------|----------------------|-----------------------|-----------------------------------------------------|-------|-------|-----------------------------------------------------------------|-------|-------|
|                 |              |                      |                       | 310 K                                               | 303 K | 293 K | 310 K                                                           | 303 K | 293 K |
| P76938          | YfcM         |                      | Monomer               | 128.6                                               | 108.7 | 83.9  | 12.5                                                            | 10.6  | 8.2   |
| P0A8B2          | YfcN         |                      | Monomer               | 128.9                                               | 108.9 | 84.1  | 12.6                                                            | 10.6  | 8.2   |
| P76498          | YfcO         |                      | Monomer               | 111.8                                               | 94.4  | 72.9  | 9.1                                                             | 7.7   | 5.9   |
| P76499          | YfcP         | Fimbrium             | Monomer               | 134.3                                               | 113.4 | 87.6  | 13.8                                                            | 11.6  | 9.0   |
|                 |              |                      | Complex with SecB     | 73.5                                                | 60.1  | 48.0  | 3.2                                                             | 2.7   | 2.1   |
|                 |              |                      | Complex with TF (Tig) | 81.8                                                | 69.1  | 53.4  | 4.3                                                             | 3.6   | 2.8   |
| P76500          | YfcQ         |                      | Monomer               | 137.3                                               | 116.0 | 89.6  | 14.4                                                            | 12.2  | 9.4   |
| P76501          | YfcR         |                      | Monomer               | 137.3                                               | 116.0 | 89.6  | 14.4                                                            | 12.2  | 9.4   |
| P77599          | YfcS         | Periplasm            | Monomer               | 115.7                                               | 97.7  | 75.5  | 9.8                                                             | 8.3   | 6.4   |
|                 |              |                      | Complex with SecB     | 70.8                                                | 57.9  | 46.2  | 2.9                                                             | 2.4   | 1.9   |
|                 |              |                      | Complex with TF (Tig) | 77.9                                                | 65.8  | 50.9  | 3.8                                                             | 3.2   | 2.5   |
| P77196          | YfcU         | Cell outer membrane  | Monomer               | 70.7                                                | 59.7  | 46.1  | 2.9                                                             | 2.5   | 1.9   |
|                 |              |                      | Complex with SecB     | 57.3                                                | 46.8  | 37.4  | 1.6                                                             | 1.3   | 1.1   |
|                 |              |                      | Complex with TF (Tig) | 60.4                                                | 51.0  | 39.4  | 1.9                                                             | 1.6   | 1.2   |
| P77288          | YfcV         |                      | Monomer               | 131.9                                               | 111.4 | 86.0  | 13.2                                                            | 11.2  | 8.6   |
| P0AD33          | YfcZ         |                      | Monomer               | 170.4                                               | 144.0 | 111.2 | 22.8                                                            | 19.3  | 14.9  |
| P37327          | YfdC         | Cell inner membrane  | Monomer               | 106.2                                               | 89.7  | 69.3  | 8.1                                                             | 6.8   | 5.3   |
|                 |              |                      | Complex with SecB     | 69.0                                                | 56.4  | 45.0  | 2.7                                                             | 2.2   | 1.8   |
|                 |              |                      | Complex with TF (Tig) | 75.4                                                | 63.7  | 49.2  | 3.5                                                             | 2.9   | 2.3   |
| P76518          | YfdE         |                      | Monomer               | 98.6                                                | 83.3  | 64.3  | 6.8                                                             | 5.7   | 4.4   |
| P76505          | YfdF         |                      | Monomer               | 99.9                                                | 84.4  | 65.2  | 7.0                                                             | 5.9   | 4.6   |
| P77682          | YfdG         | Cell inner membrane  | Monomer               | 154.6                                               | 130.6 | 100.9 | 18.6                                                            | 15.7  | 12.2  |
|                 |              |                      | Complex with SecB     | 75.5                                                | 61.7  | 49.3  | 3.5                                                             | 2.8   | 2.3   |
|                 |              |                      | Complex with TF (Tig) | 84.7                                                | 71.5  | 55.3  | 4.7                                                             | 3.9   | 3.0   |
| P77293          | YfdH         | Cell inner membrane  | Monomer               | 106.0                                               | 89.6  | 69.2  | 8.0                                                             | 6.8   | 5.3   |
|                 |              |                      | Complex with SecB     | 69.0                                                | 56.3  | 45.0  | 2.7                                                             | 2.2   | 1.8   |
|                 |              |                      | Complex with TF (Tig) | 75.3                                                | 63.6  | 49.1  | 3.5                                                             | 2.9   | 2.3   |
| P76507          | YfdI         | Cell membrane        | Monomer               | 90.8                                                | 76.7  | 59.2  | 5.5                                                             | 4.7   | 3.6   |
|                 |              |                      | Complex with SecB     | 65.0                                                | 53.1  | 42.4  | 2.3                                                             | 1.9   | 1.5   |
|                 |              |                      | Complex with TF (Tig) | 70.0                                                | 59.2  | 45.7  | 2.9                                                             | 2.4   | 1.9   |
| P77656          | YfdK         |                      | Monomer               | 142.1                                               | 120.0 | 92.7  | 15.6                                                            | 13.1  | 10.1  |

| UniProtKB A. N. | Protein name | Subcellular location | Subunit               | $D_0 \left( \frac{\mu\text{m}^2}{\text{s}} \right)$ |       |       | $D_{\text{cyto}} \left( \frac{\mu\text{m}^2}{\text{s}} \right)$ |       |       |
|-----------------|--------------|----------------------|-----------------------|-----------------------------------------------------|-------|-------|-----------------------------------------------------------------|-------|-------|
|                 |              |                      |                       | 310 K                                               | 303 K | 293 K | 310 K                                                           | 303 K | 293 K |
| P76508          | YfdL         |                      | Monomer               | 136.3                                               | 115.1 | 88.9  | 14.2                                                            | 12.0  | 9.3   |
| P76509          | YfdM         |                      | Monomer               | 170.3                                               | 143.9 | 111.1 | 22.8                                                            | 19.2  | 14.9  |
| P76510          | YfdN         |                      | Monomer               | 134.8                                               | 113.9 | 88.0  | 13.9                                                            | 11.7  | 9.1   |
| P0AD35          | YfdO         |                      | Monomer               | 149.5                                               | 126.3 | 97.6  | 17.4                                                            | 14.7  | 11.3  |
| P76512          | YfdP         |                      | Monomer               | 155.2                                               | 131.1 | 101.3 | 18.8                                                            | 15.9  | 12.2  |
| P76513          | YfdQ         |                      | Monomer               | 111.5                                               | 94.2  | 72.8  | 9.1                                                             | 7.6   | 5.9   |
| P76514          | YfdR         |                      | Monomer               | 130.8                                               | 110.5 | 85.4  | 13.0                                                            | 11.0  | 8.5   |
| P76515          | YfdS         |                      | Monomer               | 152.6                                               | 128.9 | 99.6  | 18.1                                                            | 15.3  | 11.8  |
| P76516          | YfdT         |                      | Monomer               | 159.9                                               | 135.1 | 104.4 | 20.0                                                            | 16.9  | 13.0  |
| P0AA49          | YfdV         | Cell membrane        | Monomer               | 107.3                                               | 90.6  | 70.0  | 8.3                                                             | 7.0   | 5.4   |
|                 |              |                      | Complex with SecB     | 69.2                                                | 56.6  | 45.2  | 2.8                                                             | 2.3   | 1.8   |
|                 |              |                      | Complex with TF (Tig) | 75.7                                                | 63.9  | 49.4  | 3.5                                                             | 3.0   | 2.3   |
| P76520          | YfdX         |                      | Monomer               | 124.5                                               | 105.2 | 81.2  | 11.6                                                            | 9.8   | 7.6   |
| P76521          | YfdY         | Cell membrane        | Monomer               | 180.8                                               | 152.7 | 118.0 | 25.7                                                            | 21.7  | 16.8  |
|                 |              |                      | Complex with SecB     | 77.1                                                | 63.0  | 50.3  | 3.7                                                             | 3.0   | 2.4   |
|                 |              |                      | Complex with TF (Tig) | 87.2                                                | 73.6  | 56.9  | 5.0                                                             | 4.2   | 3.3   |
| P77434          | YfdZ         | Cytoplasm            | Monomer               | 94.7                                                | 80.0  | 61.8  | 6.1                                                             | 5.2   | 4.0   |
|                 |              |                      | Homodimer             | 72.1                                                | 58.9  | 47.1  | 3.1                                                             | 2.5   | 2.0   |
| P23842          | YfeA         |                      | Monomer               | 75.1                                                | 63.4  | 49.0  | 3.4                                                             | 2.9   | 2.2   |
| P0AD37          | YfeC         |                      | Monomer               | 157.0                                               | 132.6 | 102.4 | 19.2                                                            | 16.2  | 12.5  |
| P27238          | YfeD         |                      | Monomer               | 147.5                                               | 124.6 | 96.3  | 16.9                                                            | 14.2  | 11.0  |
| P39836          | YfeH         |                      | Monomer               | 104.0                                               | 87.8  | 67.8  | 7.7                                                             | 6.5   | 5.0   |
| Q47702          | YfeK         |                      | Monomer               | 152.3                                               | 128.7 | 99.4  | 18.1                                                            | 15.3  | 11.8  |
| P45564          | YfeN         |                      | Monomer               | 113.3                                               | 95.7  | 73.9  | 9.4                                                             | 7.9   | 6.1   |
| P67729          | YfeO         | Cell membrane        | Monomer               | 96.9                                                | 81.8  | 63.2  | 6.5                                                             | 5.5   | 4.2   |
|                 |              |                      | Complex with SecB     | 66.8                                                | 54.5  | 43.6  | 2.5                                                             | 2.1   | 1.6   |
|                 |              |                      | Complex with TF (Tig) | 72.4                                                | 61.1  | 47.2  | 3.1                                                             | 2.6   | 2.0   |
| P0ACR7          | YfeR         |                      | Monomer               | 106.9                                               | 90.3  | 69.8  | 8.2                                                             | 6.9   | 5.4   |
| P78271          | YfeS         |                      | Monomer               | 114.8                                               | 97.0  | 74.9  | 9.7                                                             | 8.2   | 6.3   |
| P77619          | YfeW         |                      | Monomer               | 93.5                                                | 79.0  | 61.0  | 6.0                                                             | 5.0   | 3.9   |
| P76536          | YfeX         |                      | Monomer               | 108.0                                               | 91.2  | 70.5  | 8.4                                                             | 7.1   | 5.5   |

| UniProtKB A. N. | Protein name | Subcellular location | Subunit               | $D_0 \left( \frac{\mu\text{m}^2}{\text{s}} \right)$ |       |       | $D_{\text{cyto}} \left( \frac{\mu\text{m}^2}{\text{s}} \right)$ |       |       |
|-----------------|--------------|----------------------|-----------------------|-----------------------------------------------------|-------|-------|-----------------------------------------------------------------|-------|-------|
|                 |              |                      |                       | 310 K                                               | 303 K | 293 K | 310 K                                                           | 303 K | 293 K |
| P76537          | YfeY         |                      | Monomer               | 129.2                                               | 109.2 | 84.3  | 12.6                                                            | 10.7  | 8.2   |
| P76538          | YfeZ         | Cell inner membrane  | Monomer               | 139.6                                               | 117.9 | 91.1  | 15.0                                                            | 12.6  | 9.8   |
|                 |              |                      | Complex with SecB     | 74.1                                                | 60.6  | 48.4  | 3.3                                                             | 2.7   | 2.2   |
|                 |              |                      | Complex with TF (Tig) | 82.6                                                | 69.8  | 53.9  | 4.4                                                             | 3.7   | 2.9   |
| P24178          | YffB         |                      | Monomer               | 152.9                                               | 129.2 | 99.8  | 18.2                                                            | 15.4  | 11.9  |
| P76543          | YffL         |                      | Monomer               | 120.2                                               | 101.5 | 78.4  | 10.7                                                            | 9.1   | 7.0   |
| P76544          | YffM         |                      | Monomer               | 178.2                                               | 150.5 | 116.3 | 25.0                                                            | 21.1  | 16.3  |
| P76545          | YffN         |                      | Monomer               | 152.1                                               | 128.5 | 99.3  | 18.0                                                            | 15.2  | 11.7  |
| P76546          | YffO         |                      | Monomer               | 144.5                                               | 122.0 | 94.3  | 16.1                                                            | 13.6  | 10.5  |
| P76547          | YffP         |                      | Monomer               | 124.7                                               | 105.3 | 81.3  | 11.7                                                            | 9.9   | 7.6   |
| P76548          | YffQ         |                      | Monomer               | 152.0                                               | 128.4 | 99.2  | 18.0                                                            | 15.2  | 11.7  |
| P76549          | YffR         |                      | Monomer               | 148.9                                               | 125.8 | 97.2  | 17.2                                                            | 14.5  | 11.2  |
| P76550          | YffS         |                      | Monomer               | 112.5                                               | 95.1  | 73.4  | 9.2                                                             | 7.8   | 6.0   |
| P66948          | YfgC         |                      | Monomer               | 89.1                                                | 75.3  | 58.2  | 5.3                                                             | 4.5   | 3.5   |
| P76569          | YfgD         |                      | Monomer               | 153.8                                               | 130.0 | 100.4 | 18.4                                                            | 15.6  | 12.0  |
| P77172          | YfgF         | Cell inner membrane  | Monomer               | 74.4                                                | 62.8  | 48.5  | 3.3                                                             | 2.8   | 2.2   |
|                 |              |                      | Complex with SecB     | 59.0                                                | 48.2  | 38.5  | 1.8                                                             | 1.5   | 1.2   |
|                 |              |                      | Complex with TF (Tig) | 62.4                                                | 52.7  | 40.7  | 2.1                                                             | 1.8   | 1.4   |
| P64545          | YfgG         | Membrane             | Monomer               | 193.5                                               | 163.5 | 126.3 | 29.5                                                            | 24.9  | 19.2  |
|                 |              |                      | Complex with SecB     | 77.7                                                | 63.5  | 50.7  | 3.7                                                             | 3.1   | 2.4   |
|                 |              |                      | Complex with TF (Tig) | 88.0                                                | 74.4  | 57.4  | 5.1                                                             | 4.3   | 3.4   |
| P65290          | YfgH         | Cell membrane        | Monomer               | 137.9                                               | 116.5 | 90.0  | 14.6                                                            | 12.3  | 9.5   |
|                 |              |                      | Complex with SecB     | 73.9                                                | 60.4  | 48.3  | 3.3                                                             | 2.7   | 2.2   |
|                 |              |                      | Complex with TF (Tig) | 82.4                                                | 69.6  | 53.8  | 4.4                                                             | 3.7   | 2.8   |
| P76573          | YfgI         |                      | Monomer               | 130.9                                               | 110.6 | 85.4  | 13.0                                                            | 11.0  | 8.5   |
| P76575          | YfgJ         |                      | Monomer               | 188.3                                               | 159.1 | 122.9 | 27.9                                                            | 23.6  | 18.2  |
| P77774          | YfgL         | Cell outer membrane  | Monomer               | 98.4                                                | 83.1  | 64.2  | 6.7                                                             | 5.7   | 4.4   |
|                 |              |                      | Complex with SecB     | 67.2                                                | 54.9  | 43.8  | 2.6                                                             | 2.1   | 1.7   |
|                 |              |                      | Complex with TF (Tig) | 72.9                                                | 61.6  | 47.6  | 3.2                                                             | 2.7   | 2.1   |
| P76576          | YfgM         | Membrane             | Monomer               | 126.3                                               | 106.7 | 82.4  | 12.0                                                            | 10.1  | 7.8   |
|                 |              |                      | Complex with SecB     | 72.5                                                | 59.2  | 47.3  | 3.1                                                             | 2.6   | 2.0   |

| UniProtKB A. N. | Protein name | Subcellular location | Subunit               | $D_0 \left( \frac{\mu\text{m}^2}{\text{s}} \right)$ |       |       | $D_{\text{cyto}} \left( \frac{\mu\text{m}^2}{\text{s}} \right)$ |       |       |
|-----------------|--------------|----------------------|-----------------------|-----------------------------------------------------|-------|-------|-----------------------------------------------------------------|-------|-------|
|                 |              |                      |                       | 310 K                                               | 303 K | 293 K | 310 K                                                           | 303 K | 293 K |
|                 |              |                      | Complex with TF (Tig) | 80.3                                                | 67.8  | 52.4  | 4.1                                                             | 3.4   | 2.7   |
| P0AFU4          | YfhA         |                      | Monomer               | 92.4                                                | 78.1  | 60.3  | 5.8                                                             | 4.9   | 3.8   |
| P0AD42          | YfhB         |                      | Monomer               | 121.5                                               | 102.7 | 79.3  | 11.0                                                            | 9.3   | 7.2   |
| P0AD44          | YfhG         |                      | Monomer               | 116.3                                               | 98.2  | 75.9  | 10.0                                                            | 8.4   | 6.5   |
| P37767          | YfhH         |                      | Monomer               | 111.1                                               | 93.9  | 72.5  | 9.0                                                             | 7.6   | 5.9   |
| P52101          | YfhK         | Cell inner membrane  | Monomer               | 89.5                                                | 75.6  | 58.4  | 5.4                                                             | 4.5   | 3.5   |
|                 |              |                      | Complex with SecB     | 64.6                                                | 52.8  | 42.2  | 2.3                                                             | 1.9   | 1.5   |
|                 |              |                      | Complex with TF (Tig) | 69.5                                                | 58.8  | 45.4  | 2.8                                                             | 2.4   | 1.8   |
| P52102          | YfhL         |                      | Monomer               | 174.0                                               | 147.0 | 113.5 | 23.8                                                            | 20.1  | 15.5  |
| P76578          | YfhM         | Cell membrane        | Monomer               | 55.4                                                | 46.8  | 36.1  | 1.5                                                             | 1.3   | 1.0   |
|                 |              |                      | Complex with SecB     | 48.8                                                | 39.9  | 31.8  | 1.0                                                             | 0.8   | 0.7   |
|                 |              |                      | Complex with TF (Tig) | 50.5                                                | 42.7  | 32.9  | 1.1                                                             | 1.0   | 0.7   |
| P77538          | YfhR         | Membrane             | Monomer               | 110.0                                               | 92.9  | 71.8  | 8.8                                                             | 7.4   | 5.7   |
|                 |              |                      | Complex with SecB     | 69.8                                                | 57.0  | 45.5  | 2.8                                                             | 2.3   | 1.8   |
|                 |              |                      | Complex with TF (Tig) | 76.5                                                | 64.6  | 49.9  | 3.6                                                             | 3.0   | 2.3   |
| P07021          | YfiB         | Cell membrane        | Monomer               | 139.3                                               | 117.7 | 90.9  | 14.9                                                            | 12.6  | 9.7   |
|                 |              |                      | Complex with SecB     | 74.1                                                | 60.5  | 48.4  | 3.3                                                             | 2.7   | 2.2   |
|                 |              |                      | Complex with TF (Tig) | 82.6                                                | 69.8  | 53.9  | 4.4                                                             | 3.7   | 2.9   |
| P31825          | YfiC         | Cytoplasm            | Monomer               | 116.4                                               | 98.4  | 76.0  | 10.0                                                            | 8.4   | 6.5   |
| P33634          | YfiE         |                      | Monomer               | 107.7                                               | 91.0  | 70.3  | 8.4                                                             | 7.1   | 5.5   |
| P0AGJ5          | YfiF         |                      | Monomer               | 102.5                                               | 86.6  | 66.9  | 7.4                                                             | 6.3   | 4.8   |
| P33644          | YfiH         |                      | Monomer               | 118.0                                               | 99.7  | 77.0  | 10.3                                                            | 8.7   | 6.7   |
| P11289          | YfiL         |                      | Monomer               | 154.7                                               | 130.7 | 101.0 | 18.6                                                            | 15.8  | 12.2  |
| P46126          | YfiM         |                      | Monomer               | 161.7                                               | 136.6 | 105.5 | 20.4                                                            | 17.3  | 13.3  |
| P46139          | YfiN         | Cell inner membrane  | Monomer               | 94.9                                                | 80.1  | 61.9  | 6.2                                                             | 5.2   | 4.0   |
|                 |              |                      | Complex with TF (Tig) | 71.6                                                | 60.5  | 46.7  | 3.0                                                             | 2.6   | 2.0   |
| P0AC02          | YfiO         | Cell outer membrane  | Monomer               | 115.5                                               | 97.6  | 75.4  | 9.8                                                             | 8.3   | 6.4   |
|                 |              |                      | Complex with SecB     | 70.8                                                | 57.9  | 46.2  | 2.9                                                             | 2.4   | 1.9   |
|                 |              |                      | Complex with TF (Tig) | 77.9                                                | 65.8  | 50.8  | 3.8                                                             | 3.2   | 2.5   |
| Q47319          | YfiP         |                      | Monomer               | 118.6                                               | 100.2 | 77.4  | 10.4                                                            | 8.8   | 6.8   |

| UniProtKB A. N. | Protein name | Subcellular location | Subunit               | $D_0 \left( \frac{\mu\text{m}^2}{\text{s}} \right)$ |       |       | $D_{\text{cyto}} \left( \frac{\mu\text{m}^2}{\text{s}} \right)$ |       |       |
|-----------------|--------------|----------------------|-----------------------|-----------------------------------------------------|-------|-------|-----------------------------------------------------------------|-------|-------|
|                 |              |                      |                       | 310 K                                               | 303 K | 293 K | 310 K                                                           | 303 K | 293 K |
| P76594          | YfiQ         |                      | Monomer               | 70.5                                                | 59.6  | 46.0  | 2.9                                                             | 2.5   | 1.9   |
| P64548          | YfiR         |                      | Monomer               | 134.2                                               | 113.4 | 87.6  | 13.7                                                            | 11.6  | 9.0   |
| P37908          | YfjD         | Cell inner membrane  | Monomer               | 93.2                                                | 78.8  | 60.8  | 5.9                                                             | 5.0   | 3.9   |
|                 |              |                      | Complex with SecB     | 65.7                                                | 53.7  | 42.9  | 2.4                                                             | 2.0   | 1.6   |
|                 |              |                      | Complex with TF (Tig) | 71.0                                                | 60.0  | 46.3  | 3.0                                                             | 2.5   | 1.9   |
| P52123          | YfjH         |                      | Monomer               | 103.1                                               | 87.1  | 67.3  | 7.5                                                             | 6.4   | 4.9   |
| P52124          | YfjI         |                      | Monomer               | 89.1                                                | 75.2  | 58.1  | 5.3                                                             | 4.5   | 3.5   |
| P52125          | YfjJ         |                      | Monomer               | 121.3                                               | 102.5 | 79.2  | 11.0                                                            | 9.3   | 7.2   |
| P52126          | YfjK         |                      | Monomer               | 75.2                                                | 63.6  | 49.1  | 3.4                                                             | 2.9   | 2.3   |
| P52127          | YfjL         |                      | Monomer               | 84.4                                                | 71.3  | 55.1  | 4.6                                                             | 3.9   | 3.0   |
| P52128          | YfjM         |                      | Monomer               | 172.7                                               | 145.9 | 112.7 | 23.4                                                            | 19.8  | 15.3  |
| P52129          | YfjN         |                      | Monomer               | 100.1                                               | 84.6  | 65.3  | 7.0                                                             | 5.9   | 4.6   |
| P52130          | YfjO         |                      | Monomer               | 152.6                                               | 129.0 | 99.6  | 18.1                                                            | 15.3  | 11.8  |
| P52131          | YfjP         |                      | Monomer               | 109.2                                               | 92.3  | 71.3  | 8.6                                                             | 7.3   | 5.6   |
| P52132          | YfjQ         |                      | Monomer               | 110.4                                               | 93.2  | 72.0  | 8.8                                                             | 7.5   | 5.8   |
| P52133          | YfjR         |                      | Monomer               | 117.6                                               | 99.3  | 76.7  | 10.2                                                            | 8.6   | 6.7   |
| O52982          | YfjS         | Cell membrane        | Monomer               | 141.0                                               | 119.1 | 92.0  | 15.3                                                            | 12.9  | 10.0  |
|                 |              |                      | Complex with SecB     | 74.3                                                | 60.7  | 48.5  | 3.3                                                             | 2.7   | 2.2   |
|                 |              |                      | Complex with TF (Tig) | 82.9                                                | 70.0  | 54.1  | 4.4                                                             | 3.7   | 2.9   |
| P52135          | YfjT         |                      | Monomer               | 139.8                                               | 118.1 | 91.2  | 15.0                                                            | 12.7  | 9.8   |
| P0CF86          | YfjU         |                      | Monomer               | 213.8                                               | 180.6 | 139.5 | 35.8                                                            | 30.3  | 23.4  |
| P52137          | YfjV         | Cell inner membrane  | Monomer               | 104.6                                               | 88.4  | 68.3  | 7.8                                                             | 6.6   | 5.1   |
|                 |              |                      | Complex with SecB     | 68.7                                                | 56.1  | 44.8  | 2.7                                                             | 2.2   | 1.8   |
|                 |              |                      | Complex with TF (Tig) | 74.9                                                | 63.3  | 48.9  | 3.4                                                             | 2.9   | 2.2   |
| P52138          | YfjW         | Cell membrane        | Monomer               | 83.2                                                | 70.3  | 54.3  | 4.5                                                             | 3.8   | 2.9   |
|                 |              |                      | Complex with SecB     | 62.5                                                | 51.1  | 40.8  | 2.1                                                             | 1.7   | 1.4   |
|                 |              |                      | Complex with TF (Tig) | 66.8                                                | 56.5  | 43.6  | 2.5                                                             | 2.1   | 1.6   |
| P52139          | YfjX         |                      | Monomer               | 139.2                                               | 117.6 | 90.8  | 14.9                                                            | 12.6  | 9.7   |
| P52140          | YfjY         |                      | Monomer               | 137.1                                               | 115.8 | 89.5  | 14.4                                                            | 12.2  | 9.4   |
| P52141          | YfjZ         |                      | Monomer               | 162.0                                               | 136.9 | 105.7 | 20.5                                                            | 17.4  | 13.4  |
| P0AD53          | YgaC         |                      | Monomer               | 155.3                                               | 131.2 | 101.4 | 18.8                                                            | 15.9  | 12.3  |

| UniProtKB A. N. | Protein name | Subcellular location | Subunit               | $D_0 \left( \frac{\mu\text{m}^2}{\text{s}} \right)$ |       |       | $D_{\text{cyto}} \left( \frac{\mu\text{m}^2}{\text{s}} \right)$ |       |       |
|-----------------|--------------|----------------------|-----------------------|-----------------------------------------------------|-------|-------|-----------------------------------------------------------------|-------|-------|
|                 |              |                      |                       | 310 K                                               | 303 K | 293 K | 310 K                                                           | 303 K | 293 K |
| P0A6G3          | YgaD         |                      | Monomer               | 138.3                                               | 116.8 | 90.2  | 14.7                                                            | 12.4  | 9.6   |
| P43667          | YgaH         |                      | Monomer               | 160.5                                               | 135.6 | 104.7 | 20.1                                                            | 17.0  | 13.1  |
| P0ADQ7          | YgaM         |                      | Monomer               | 159.1                                               | 134.4 | 103.8 | 19.8                                                            | 16.7  | 12.9  |
| P55734          | YgaP         | Cell inner membrane  | Monomer               | 135.2                                               | 114.2 | 88.2  | 14.0                                                            | 11.8  | 9.1   |
|                 |              |                      | Complex with SecB     | 73.6                                                | 60.2  | 48.1  | 3.3                                                             | 2.7   | 2.1   |
|                 |              |                      | Complex with TF (Tig) | 81.9                                                | 69.2  | 53.5  | 4.3                                                             | 3.6   | 2.8   |
| P76616          | YgaQ         |                      | Monomer               | 74.5                                                | 62.9  | 48.6  | 3.4                                                             | 2.8   | 2.2   |
| P0ADE6          | YgaU         |                      | Monomer               | 143.3                                               | 121.0 | 93.5  | 15.8                                                            | 13.4  | 10.3  |
| P77295          | YgaV         |                      | Monomer               | 168.6                                               | 142.5 | 110.1 | 22.3                                                            | 18.9  | 14.6  |
|                 |              |                      | Homodimer             | 128.5                                               | 105.0 | 83.9  | 12.5                                                            | 10.2  | 8.1   |
| P64550          | YgaW         | Cell membrane        | Monomer               | 140.3                                               | 118.5 | 91.5  | 15.1                                                            | 12.8  | 9.9   |
|                 |              |                      | Complex with SecB     | 74.2                                                | 60.6  | 48.4  | 3.3                                                             | 2.7   | 2.2   |
|                 |              |                      | Complex with TF (Tig) | 82.8                                                | 69.9  | 54.0  | 4.4                                                             | 3.7   | 2.9   |
| P76628          | YgaY         | Cell inner membrane  | Monomer               | 98.6                                                | 83.3  | 64.3  | 6.8                                                             | 5.7   | 4.4   |
|                 |              |                      | Complex with SecB     | 67.2                                                | 54.9  | 43.9  | 2.6                                                             | 2.1   | 1.7   |
|                 |              |                      | Complex with TF (Tig) | 73.0                                                | 61.6  | 47.6  | 3.2                                                             | 2.7   | 2.1   |
| P76630          | YgaZ         | Cell inner membrane  | Monomer               | 118.4                                               | 100.1 | 77.3  | 10.4                                                            | 8.8   | 6.8   |
|                 |              |                      | Complex with SecB     | 71.3                                                | 58.3  | 46.5  | 3.0                                                             | 2.4   | 2.0   |
|                 |              |                      | Complex with TF (Tig) | 78.6                                                | 66.4  | 51.3  | 3.9                                                             | 3.3   | 2.5   |
| P25728          | YgbA         |                      | Monomer               | 151.5                                               | 128.0 | 98.8  | 17.8                                                            | 15.1  | 11.6  |
| P46141          | YgbE         | Cell inner membrane  | Monomer               | 160.5                                               | 135.6 | 104.8 | 20.2                                                            | 17.0  | 13.1  |
|                 |              |                      | Complex with SecB     | 75.9                                                | 62.0  | 49.6  | 3.5                                                             | 2.9   | 2.3   |
|                 |              |                      | Complex with TF (Tig) | 85.3                                                | 72.1  | 55.7  | 4.8                                                             | 4.0   | 3.1   |
| P45956          | YgbF         |                      | Monomer               | 169.1                                               | 142.9 | 110.4 | 22.5                                                            | 19.0  | 14.7  |
| P52598          | YgbI         |                      | Monomer               | 116.1                                               | 98.1  | 75.8  | 9.9                                                             | 8.4   | 6.5   |
| Q46888          | YgbJ         |                      | Monomer               | 111.1                                               | 93.8  | 72.5  | 9.0                                                             | 7.6   | 5.9   |
| Q46889          | YgbK         |                      | Monomer               | 98.9                                                | 83.6  | 64.5  | 6.8                                                             | 5.8   | 4.5   |
| Q46890          | YgbL         |                      | Monomer               | 124.0                                               | 104.8 | 80.9  | 11.5                                                            | 9.7   | 7.5   |
| Q46891          | YgbM         |                      | Monomer               | 113.3                                               | 95.7  | 73.9  | 9.4                                                             | 7.9   | 6.1   |
| Q46892          | YgbN         | Cell inner membrane  | Monomer               | 94.2                                                | 79.6  | 61.5  | 6.1                                                             | 5.1   | 4.0   |
|                 |              |                      | Complex with SecB     | 66.0                                                | 53.9  | 43.1  | 2.4                                                             | 2.0   | 1.6   |

| UniProtKB A. N. | Protein name | Subcellular location | Subunit                 | $D_0 \left( \frac{\mu\text{m}^2}{\text{s}} \right)$ |       |       | $D_{\text{cyto}} \left( \frac{\mu\text{m}^2}{\text{s}} \right)$ |       |       |
|-----------------|--------------|----------------------|-------------------------|-----------------------------------------------------|-------|-------|-----------------------------------------------------------------|-------|-------|
|                 |              |                      |                         | 310 K                                               | 303 K | 293 K | 310 K                                                           | 303 K | 293 K |
|                 |              |                      | Complex with TF (Tig)   | 71.4                                                | 60.3  | 46.6  | 3.0                                                             | 2.5   | 2.0   |
| Q46896          | YgbT         |                      | Monomer                 | 107.8                                               | 91.1  | 70.3  | 8.4                                                             | 7.1   | 5.5   |
| P38036          | YgcB         |                      | Monomer                 | 69.8                                                | 59.0  | 45.6  | 2.8                                                             | 2.4   | 1.8   |
| P55138          | YgcE         |                      | Monomer                 | 89.0                                                | 75.2  | 58.0  | 5.3                                                             | 4.5   | 3.4   |
| P64554          | YgcF         |                      | Monomer                 | 120.4                                               | 101.7 | 78.6  | 10.8                                                            | 9.1   | 7.0   |
| P55140          | YgcG         | Cell membrane        | Monomer                 | 109.1                                               | 92.1  | 71.2  | 8.6                                                             | 7.3   | 5.6   |
|                 |              |                      | Complex with SecB       | 69.6                                                | 56.9  | 45.4  | 2.8                                                             | 2.3   | 1.8   |
|                 |              |                      | Complex with TF (Tig)   | 76.2                                                | 64.4  | 49.7  | 3.6                                                             | 3.0   | 2.3   |
| Q46897          | YgcH         |                      | Monomer                 | 126.0                                               | 106.4 | 82.2  | 11.9                                                            | 10.1  | 7.8   |
| Q46898          | YgcI         |                      | Monomer                 | 120.1                                               | 101.4 | 78.3  | 10.7                                                            | 9.1   | 7.0   |
| Q46899          | YgcJ         |                      | Monomer                 | 100.2                                               | 84.6  | 65.4  | 7.0                                                             | 5.9   | 4.6   |
| P76632          | YgcK         |                      | Monomer                 | 135.0                                               | 114.0 | 88.1  | 13.9                                                            | 11.8  | 9.1   |
| Q46901          | YgcL         |                      | Monomer                 | 87.9                                                | 74.2  | 57.3  | 5.1                                                             | 4.3   | 3.3   |
| Q46904          | YgcN         |                      | Monomer                 | 94.5                                                | 79.9  | 61.7  | 6.1                                                             | 5.2   | 4.0   |
| Q46905          | YgcO         |                      | Monomer                 | 174.9                                               | 147.7 | 114.1 | 24.0                                                            | 20.3  | 15.7  |
| Q46906          | YgcP         |                      | Monomer                 | 129.5                                               | 109.4 | 84.5  | 12.7                                                            | 10.7  | 8.3   |
| Q46907          | YgcQ         |                      | Monomer                 | 111.7                                               | 94.4  | 72.9  | 9.1                                                             | 7.7   | 5.9   |
|                 |              |                      | Heterodimer (YgcQ–YgcR) | 86.0                                                | 72.7  | 56.1  | 4.9                                                             | 4.1   | 3.2   |
| Q46908          | YgcR         |                      | Monomer                 | 114.1                                               | 96.4  | 74.4  | 9.5                                                             | 8.1   | 6.2   |
|                 |              |                      | Heterodimer (YgcQ–YgcR) | 86.0                                                | 72.7  | 56.1  | 4.9                                                             | 4.1   | 3.2   |
| Q46909          | YgcS         | Cell inner membrane  | Monomer                 | 93.1                                                | 78.7  | 60.8  | 5.9                                                             | 5.0   | 3.8   |
|                 |              |                      | Complex with SecB       | 65.7                                                | 53.7  | 42.9  | 2.4                                                             | 2.0   | 1.6   |
|                 |              |                      | Complex with TF (Tig)   | 71.0                                                | 59.9  | 46.3  | 3.0                                                             | 2.5   | 1.9   |
| Q46911          | YgcU         |                      | Monomer                 | 89.2                                                | 75.4  | 58.2  | 5.3                                                             | 4.5   | 3.5   |
| P76633          | YgcW         |                      | Monomer                 | 115.2                                               | 97.3  | 75.1  | 9.7                                                             | 8.2   | 6.4   |
| P08370          | YgdB         |                      | Monomer                 | 147.3                                               | 124.4 | 96.1  | 16.8                                                            | 14.2  | 11.0  |
| P0ADR2          | YgdD         | Cell inner membrane  | Monomer                 | 149.8                                               | 126.6 | 97.8  | 17.4                                                            | 14.7  | 11.4  |
|                 |              |                      | Complex with SecB       | 75.1                                                | 61.4  | 49.0  | 3.4                                                             | 2.8   | 2.2   |
|                 |              |                      | Complex with TF (Tig)   | 84.1                                                | 71.0  | 54.9  | 4.6                                                             | 3.9   | 3.0   |
| P38506          | YgdG         |                      | Monomer                 | 115.0                                               | 97.1  | 75.0  | 9.7                                                             | 8.2   | 6.3   |
| P0ADR8          | YgdH         |                      | Monomer                 | 91.1                                                | 77.0  | 59.5  | 5.6                                                             | 4.7   | 3.7   |

| UniProtKB A. N. | Protein name | Subcellular location | Subunit               | $D_0 \left( \frac{\mu\text{m}^2}{\text{s}} \right)$ |       |       | $D_{\text{cyto}} \left( \frac{\mu\text{m}^2}{\text{s}} \right)$ |       |       |
|-----------------|--------------|----------------------|-----------------------|-----------------------------------------------------|-------|-------|-----------------------------------------------------------------|-------|-------|
|                 |              |                      |                       | 310 K                                               | 303 K | 293 K | 310 K                                                           | 303 K | 293 K |
| P65292          | YgdI         | Cell membrane        | Monomer               | 186.7                                               | 157.7 | 121.8 | 27.4                                                            | 23.2  | 17.9  |
|                 |              |                      | Complex with SecB     | 77.4                                                | 63.2  | 50.5  | 3.7                                                             | 3.0   | 2.4   |
|                 |              |                      | Complex with TF (Tig) | 87.6                                                | 74.0  | 57.2  | 5.1                                                             | 4.3   | 3.3   |
| P0AGF2          | YgdK         |                      | Monomer               | 143.7                                               | 121.4 | 93.8  | 15.9                                                            | 13.5  | 10.4  |
| Q46927          | YgdL         | Membrane             | Monomer               | 114.3                                               | 96.6  | 74.6  | 9.6                                                             | 8.1   | 6.3   |
|                 |              |                      | Complex with SecB     | 70.6                                                | 57.7  | 46.1  | 2.9                                                             | 2.4   | 1.9   |
|                 |              |                      | Complex with TF (Tig) | 77.6                                                | 65.6  | 50.6  | 3.7                                                             | 3.2   | 2.4   |
| P67127          | YgdQ         | Cell inner membrane  | Monomer               | 118.3                                               | 100.0 | 77.2  | 10.4                                                            | 8.8   | 6.8   |
|                 |              |                      | Complex with SecB     | 71.3                                                | 58.2  | 46.5  | 3.0                                                             | 2.4   | 2.0   |
|                 |              |                      | Complex with TF (Tig) | 78.6                                                | 66.4  | 51.3  | 3.9                                                             | 3.3   | 2.5   |
| P65294          | YgdR         | Cell membrane        | Monomer               | 189.4                                               | 160.0 | 123.6 | 28.3                                                            | 23.9  | 18.4  |
|                 |              |                      | Complex with SecB     | 77.5                                                | 63.3  | 50.6  | 3.7                                                             | 3.0   | 2.4   |
|                 |              |                      | Complex with TF (Tig) | 87.8                                                | 74.1  | 57.3  | 5.1                                                             | 4.3   | 3.3   |
| P03813          | YgeA         |                      | Monomer               | 120.0                                               | 101.4 | 78.3  | 10.7                                                            | 9.0   | 7.0   |
| Q46786          | YgeF         |                      | Monomer               | 140.5                                               | 118.7 | 91.7  | 15.2                                                            | 12.8  | 9.9   |
| Q46787          | YgeG         |                      | Monomer               | 133.9                                               | 113.1 | 87.4  | 13.7                                                            | 11.5  | 8.9   |
| P76639          | YgeH         |                      | Monomer               | 89.9                                                | 75.9  | 58.7  | 5.4                                                             | 4.6   | 3.5   |
| Q46789          | YgeI         |                      | Monomer               | 187.8                                               | 158.6 | 122.5 | 27.8                                                            | 23.5  | 18.1  |
| Q46791          | YgeK         |                      | Monomer               | 123.6                                               | 104.4 | 80.6  | 11.4                                                            | 9.7   | 7.5   |
| Q46793          | YgeN         |                      | Monomer               | 116.3                                               | 98.2  | 75.9  | 10.0                                                            | 8.4   | 6.5   |
| Q46795          | YgeO         |                      | Monomer               | 145.1                                               | 122.6 | 94.7  | 16.3                                                            | 13.7  | 10.6  |
| Q46796          | YgeP         |                      | Monomer               | 164.5                                               | 139.0 | 107.3 | 21.2                                                            | 17.9  | 13.8  |
| Q46797          | YgeQ         |                      | Monomer               | 110.3                                               | 93.2  | 72.0  | 8.8                                                             | 7.5   | 5.8   |
| Q46798          | YgeR         | Cell membrane        | Monomer               | 117.6                                               | 99.4  | 76.8  | 10.2                                                            | 8.6   | 6.7   |
|                 |              |                      | Complex with SecB     | 71.2                                                | 58.2  | 46.4  | 3.0                                                             | 2.4   | 1.9   |
|                 |              |                      | Complex with TF (Tig) | 78.4                                                | 66.2  | 51.2  | 3.8                                                             | 3.2   | 2.5   |
| Q46802          | YgeV         |                      | Monomer               | 82.3                                                | 69.5  | 53.7  | 4.3                                                             | 3.7   | 2.8   |
| Q46803          | YgeW         |                      | Monomer               | 96.4                                                | 81.4  | 62.9  | 6.4                                                             | 5.4   | 4.2   |
| P66899          | YgeX         |                      | Monomer               | 97.1                                                | 82.0  | 63.4  | 6.5                                                             | 5.5   | 4.3   |
| P65807          | YgeY         |                      | Monomer               | 95.8                                                | 81.0  | 62.5  | 6.3                                                             | 5.3   | 4.1   |
| P0AC28          | YgfA         |                      | Monomer               | 128.7                                               | 108.8 | 84.0  | 12.5                                                            | 10.6  | 8.2   |



| UniProtKB A. N. | Protein name | Subcellular location | Subunit               | $D_0 \left( \frac{\mu\text{m}^2}{\text{s}} \right)$ |       |       | $D_{\text{cyto}} \left( \frac{\mu\text{m}^2}{\text{s}} \right)$ |       |       |
|-----------------|--------------|----------------------|-----------------------|-----------------------------------------------------|-------|-------|-----------------------------------------------------------------|-------|-------|
|                 |              |                      |                       | 310 K                                               | 303 K | 293 K | 310 K                                                           | 303 K | 293 K |
| P0A8C4          | YgfB         |                      | Monomer               | 128.4                                               | 108.5 | 83.8  | 12.5                                                            | 10.5  | 8.1   |
| P52037          | YgfF         |                      | Monomer               | 118.7                                               | 100.3 | 77.5  | 10.5                                                            | 8.8   | 6.8   |
| P52043          | YgfH         |                      | Monomer               | 89.2                                                | 75.3  | 58.2  | 5.3                                                             | 4.5   | 3.5   |
| P52044          | YgfI         |                      | Monomer               | 106.0                                               | 89.5  | 69.1  | 8.0                                                             | 6.8   | 5.2   |
| Q46810          | YgfJ         |                      | Monomer               | 127.8                                               | 107.9 | 83.4  | 12.3                                                            | 10.4  | 8.0   |
| Q46811          | YgfK         |                      | Monomer               | 66.1                                                | 55.8  | 43.1  | 2.4                                                             | 2.1   | 1.6   |
| P64557          | YgfM         |                      | Monomer               | 114.2                                               | 96.5  | 74.5  | 9.6                                                             | 8.1   | 6.2   |
| Q46817          | YgfQ         | Cell membrane        | Monomer               | 94.2                                                | 79.6  | 61.5  | 6.1                                                             | 5.1   | 4.0   |
|                 |              |                      | Complex with SecB     | 66.0                                                | 53.9  | 43.1  | 2.4                                                             | 2.0   | 1.6   |
|                 |              |                      | Complex with TF (Tig) | 71.4                                                | 60.3  | 46.6  | 3.0                                                             | 2.5   | 2.0   |
| Q46819          | YgfS         |                      | Monomer               | 138.5                                               | 117.0 | 90.4  | 14.7                                                            | 12.4  | 9.6   |
| Q46820          | YgfT         |                      | Monomer               | 80.9                                                | 68.3  | 52.8  | 4.2                                                             | 3.5   | 2.7   |
| Q46821          | YgfU         | Cell inner membrane  | Monomer               | 90.6                                                | 76.5  | 59.1  | 5.5                                                             | 4.7   | 3.6   |
|                 |              |                      | Complex with SecB     | 64.9                                                | 53.1  | 42.4  | 2.3                                                             | 1.9   | 1.5   |
|                 |              |                      | Complex with TF (Tig) | 70.0                                                | 59.1  | 45.7  | 2.8                                                             | 2.4   | 1.9   |
| Q46824          | YgfX         | Membrane             | Monomer               | 143.3                                               | 121.0 | 93.5  | 15.8                                                            | 13.4  | 10.3  |
|                 |              |                      | Complex with SecB     | 74.5                                                | 60.9  | 48.6  | 3.4                                                             | 2.7   | 2.2   |
|                 |              |                      | Complex with TF (Tig) | 83.2                                                | 70.3  | 54.3  | 4.5                                                             | 3.8   | 2.9   |
| P64559          | YgfY         |                      | Monomer               | 169.0                                               | 142.7 | 110.3 | 22.4                                                            | 18.9  | 14.6  |
| P0ADE8          | YgfZ         | Cytoplasm            | Monomer               | 104.3                                               | 88.1  | 68.1  | 7.7                                                             | 6.5   | 5.1   |
| P11664          | YggC         |                      | Monomer               | 116.7                                               | 98.6  | 76.1  | 10.0                                                            | 8.5   | 6.6   |
| P11663          | YggD         |                      | Monomer               | 133.4                                               | 112.7 | 87.0  | 13.6                                                            | 11.5  | 8.8   |
| P0ADS6          | YggE         |                      | Monomer               | 117.5                                               | 99.3  | 76.7  | 10.2                                                            | 8.6   | 6.7   |
| P21437          | YggF         |                      | Monomer               | 106.4                                               | 89.9  | 69.4  | 8.1                                                             | 6.9   | 5.3   |
|                 |              |                      | Homodimer             | 81.1                                                | 66.2  | 52.9  | 4.2                                                             | 3.4   | 2.7   |
| P25894          | YggG         |                      | Monomer               | 117.1                                               | 99.0  | 76.4  | 10.1                                                            | 8.6   | 6.6   |
| P38521          | YggL         |                      | Monomer               | 156.2                                               | 132.0 | 101.9 | 19.0                                                            | 16.1  | 12.4  |
| P46142          | YggM         |                      | Monomer               | 101.7                                               | 86.0  | 66.4  | 7.3                                                             | 6.2   | 4.8   |
| P0ADS9          | YggN         |                      | Monomer               | 117.9                                               | 99.6  | 76.9  | 10.3                                                            | 8.7   | 6.7   |
| P52048          | YggP         |                      | Monomer               | 95.0                                                | 80.3  | 62.0  | 6.2                                                             | 5.2   | 4.0   |
| P52052          | YggR         |                      | Monomer               | 104.4                                               | 88.2  | 68.1  | 7.8                                                             | 6.6   | 5.1   |

| UniProtKB A. N. | Protein name | Subcellular location | Subunit               | $D_0 \left( \frac{\mu\text{m}^2}{\text{s}} \right)$ |       |       | $D_{\text{cyto}} \left( \frac{\mu\text{m}^2}{\text{s}} \right)$ |       |       |
|-----------------|--------------|----------------------|-----------------------|-----------------------------------------------------|-------|-------|-----------------------------------------------------------------|-------|-------|
|                 |              |                      |                       | 310 K                                               | 303 K | 293 K | 310 K                                                           | 303 K | 293 K |
| P67080          | YggS         |                      | Monomer               | 119.0                                               | 100.5 | 77.7  | 10.5                                                            | 8.9   | 6.9   |
| P64564          | YggT         | Cell membrane        | Monomer               | 128.6                                               | 108.6 | 83.9  | 12.5                                                            | 10.6  | 8.2   |
|                 |              |                      | Complex with SecB     | 72.8                                                | 59.5  | 47.5  | 3.2                                                             | 2.6   | 2.1   |
|                 |              |                      | Complex with TF (Tig) | 80.7                                                | 68.2  | 52.7  | 4.1                                                             | 3.5   | 2.7   |
| P52060          | YggU         |                      | Monomer               | 169.5                                               | 143.2 | 110.6 | 22.6                                                            | 19.1  | 14.7  |
| P52062          | YggW         |                      | Monomer               | 97.8                                                | 82.6  | 63.8  | 6.6                                                             | 5.6   | 4.3   |
| P0A8P3          | YggX         |                      | Monomer               | 166.5                                               | 140.6 | 108.6 | 21.7                                                            | 18.4  | 14.2  |
| P0AG84          | YghA         |                      | Monomer               | 110.0                                               | 93.0  | 71.8  | 8.8                                                             | 7.4   | 5.7   |
| P0AA60          | YghB         | Cell inner membrane  | Monomer               | 122.1                                               | 103.2 | 79.7  | 11.1                                                            | 9.4   | 7.3   |
|                 |              |                      | Complex with SecB     | 71.9                                                | 58.7  | 46.9  | 3.1                                                             | 2.5   | 2.0   |
|                 |              |                      | Complex with TF (Tig) | 79.4                                                | 67.1  | 51.8  | 4.0                                                             | 3.4   | 2.6   |
| Q46832          | YghD         | Cell inner membrane  | Monomer               | 130.5                                               | 110.2 | 85.1  | 12.9                                                            | 10.9  | 8.4   |
|                 |              |                      | Complex with SecB     | 73.1                                                | 59.7  | 47.7  | 3.2                                                             | 2.6   | 2.1   |
|                 |              |                      | Complex with TF (Tig) | 81.1                                                | 68.5  | 52.9  | 4.2                                                             | 3.5   | 2.7   |
| Q46833          | YghE         | Cell inner membrane  | Monomer               | 109.3                                               | 92.3  | 71.3  | 8.6                                                             | 7.3   | 5.6   |
|                 |              |                      | Complex with SecB     | 69.6                                                | 56.9  | 45.4  | 2.8                                                             | 2.3   | 1.8   |
|                 |              |                      | Complex with TF (Tig) | 76.3                                                | 64.4  | 49.8  | 3.6                                                             | 3.0   | 2.3   |
| Q46834          | YghF         | Periplasm            | Monomer               | 109.2                                               | 92.2  | 71.3  | 8.6                                                             | 7.3   | 5.6   |
|                 |              |                      | Complex with SecB     | 69.6                                                | 56.9  | 45.4  | 2.8                                                             | 2.3   | 1.8   |
|                 |              |                      | Complex with TF (Tig) | 76.2                                                | 64.4  | 49.7  | 3.6                                                             | 3.0   | 2.3   |
| Q46835          | YghG         | Cell membrane        | Monomer               | 148.5                                               | 125.4 | 96.9  | 17.1                                                            | 14.4  | 11.1  |
|                 |              |                      | Complex with SecB     | 75.0                                                | 61.3  | 48.9  | 3.4                                                             | 2.8   | 2.2   |
|                 |              |                      | Complex with TF (Tig) | 83.9                                                | 70.9  | 54.8  | 4.6                                                             | 3.9   | 3.0   |
| P0CK95          | YghJ         | Cell membrane        | Monomer               | 57.2                                                | 48.3  | 37.3  | 1.6                                                             | 1.4   | 1.1   |
|                 |              |                      | Complex with SecB     | 49.9                                                | 40.8  | 32.6  | 1.1                                                             | 0.9   | 0.7   |
|                 |              |                      | Complex with TF (Tig) | 51.8                                                | 43.7  | 33.8  | 1.2                                                             | 1.0   | 0.8   |
| Q46840          | YghO         |                      | Monomer               | 98.5                                                | 83.2  | 64.3  | 6.8                                                             | 5.7   | 4.4   |
| Q46841          | YghQ         | Cell inner membrane  | Monomer               | 101.7                                               | 85.9  | 66.3  | 7.3                                                             | 6.2   | 4.8   |
|                 |              |                      | Complex with SecB     | 68.0                                                | 55.5  | 44.4  | 2.6                                                             | 2.2   | 1.7   |
|                 |              |                      | Complex with TF (Tig) | 74.0                                                | 62.5  | 48.3  | 3.3                                                             | 2.8   | 2.2   |
| P64572          | YghR         |                      | Monomer               | 115.0                                               | 97.1  | 75.0  | 9.7                                                             | 8.2   | 6.3   |

| UniProtKB A. N. | Protein name | Subcellular location | Subunit               | $D_0 \left( \frac{\mu\text{m}^2}{\text{s}} \right)$ |       |       | $D_{\text{cyto}} \left( \frac{\mu\text{m}^2}{\text{s}} \right)$ |       |       |
|-----------------|--------------|----------------------|-----------------------|-----------------------------------------------------|-------|-------|-----------------------------------------------------------------|-------|-------|
|                 |              |                      |                       | 310 K                                               | 303 K | 293 K | 310 K                                                           | 303 K | 293 K |
| Q46843          | YghS         |                      | Monomer               | 118.0                                               | 99.7  | 77.0  | 10.3                                                            | 8.7   | 6.7   |
| Q46844          | YghT         |                      | Monomer               | 119.8                                               | 101.2 | 78.2  | 10.7                                                            | 9.0   | 7.0   |
| Q46845          | YghU         |                      | Monomer               | 108.8                                               | 91.9  | 71.0  | 8.6                                                             | 7.2   | 5.6   |
|                 |              |                      | Homodimer             | 82.9                                                | 67.8  | 54.1  | 4.4                                                             | 3.6   | 2.9   |
| P64574          | YghW         |                      | Monomer               | 166.5                                               | 140.7 | 108.7 | 21.7                                                            | 18.4  | 14.2  |
| Q7DFU6          | YghX         |                      | Monomer               | 111.7                                               | 94.4  | 72.9  | 9.1                                                             | 7.7   | 5.9   |
| Q46851          | YghZ         |                      | Monomer               | 101.4                                               | 85.6  | 66.1  | 7.2                                                             | 6.1   | 4.7   |
| Q79CP2          | YgiA         |                      | Monomer               | 173.1                                               | 146.2 | 112.9 | 23.5                                                            | 19.9  | 15.4  |
| P0ADT2          | YgiB         |                      | Monomer               | 123.5                                               | 104.3 | 80.6  | 11.4                                                            | 9.6   | 7.4   |
| P0ADT5          | YgiC         |                      | Monomer               | 95.6                                                | 80.8  | 62.4  | 6.3                                                             | 5.3   | 4.1   |
| P24197          | YgiD         |                      | Monomer               | 113.8                                               | 96.2  | 74.3  | 9.5                                                             | 8.0   | 6.2   |
| P30871          | YgiF         |                      | Monomer               | 93.0                                                | 78.6  | 60.7  | 5.9                                                             | 5.0   | 3.8   |
| P39834          | YgiL         | Fimbrium             | Monomer               | 132.8                                               | 112.2 | 86.7  | 13.4                                                            | 11.3  | 8.8   |
|                 |              |                      | Complex with SecB     | 73.4                                                | 59.9  | 47.9  | 3.2                                                             | 2.6   | 2.1   |
|                 |              |                      | Complex with TF (Tig) | 81.5                                                | 68.9  | 53.2  | 4.2                                                             | 3.6   | 2.8   |
| P0ADT8          | YgiM         | Membrane             | Monomer               | 124.3                                               | 105.0 | 81.1  | 11.6                                                            | 9.8   | 7.6   |
|                 |              |                      | Complex with SecB     | 72.2                                                | 59.0  | 47.1  | 3.1                                                             | 2.5   | 2.0   |
|                 |              |                      | Complex with TF (Tig) | 79.9                                                | 67.5  | 52.1  | 4.0                                                             | 3.4   | 2.6   |
| P0ADU2          | YgiN         |                      | Monomer               | 163.1                                               | 137.8 | 106.5 | 20.8                                                            | 17.6  | 13.6  |
|                 |              |                      | Homodimer             | 124.3                                               | 101.6 | 81.1  | 11.6                                                            | 9.5   | 7.6   |
| Q46861          | YgiQ         |                      | Monomer               | 75.1                                                | 63.4  | 49.0  | 3.4                                                             | 2.9   | 2.2   |
| Q46863          | YgiS         | Periplasm            | Monomer               | 85.1                                                | 71.9  | 55.5  | 4.7                                                             | 4.0   | 3.1   |
|                 |              |                      | Complex with SecB     | 63.2                                                | 51.6  | 41.2  | 2.2                                                             | 1.8   | 1.4   |
|                 |              |                      | Complex with TF (Tig) | 67.7                                                | 57.2  | 44.2  | 2.6                                                             | 2.2   | 1.7   |
| Q46866          | YgiV         |                      | Monomer               | 137.5                                               | 116.2 | 89.7  | 14.5                                                            | 12.2  | 9.5   |
| P0ADU5          | YgiW         | Periplasm            | Monomer               | 151.2                                               | 127.7 | 98.6  | 17.8                                                            | 15.0  | 11.6  |
|                 |              |                      | Complex with SecB     | 75.2                                                | 61.4  | 49.1  | 3.4                                                             | 2.8   | 2.2   |
|                 |              |                      | Complex with TF (Tig) | 84.3                                                | 71.2  | 55.0  | 4.6                                                             | 3.9   | 3.0   |
| Q46867          | YgiZ         | Cell inner membrane  | Monomer               | 154.7                                               | 130.7 | 101.0 | 18.7                                                            | 15.8  | 12.2  |
|                 |              |                      | Complex with SecB     | 75.5                                                | 61.7  | 49.3  | 3.5                                                             | 2.8   | 2.3   |
|                 |              |                      | Complex with TF (Tig) | 84.7                                                | 71.6  | 55.3  | 4.7                                                             | 3.9   | 3.0   |

| UniProtKB A. N. | Protein name | Subcellular location | Subunit               | $D_0 \left( \frac{\mu\text{m}^2}{\text{s}} \right)$ |       |       | $D_{\text{cyto}} \left( \frac{\mu\text{m}^2}{\text{s}} \right)$ |       |       |
|-----------------|--------------|----------------------|-----------------------|-----------------------------------------------------|-------|-------|-----------------------------------------------------------------|-------|-------|
|                 |              |                      |                       | 310 K                                               | 303 K | 293 K | 310 K                                                           | 303 K | 293 K |
| P42589          | YgjH         |                      | Monomer               | 159.0                                               | 134.3 | 103.8 | 19.8                                                            | 16.7  | 12.9  |
|                 |              |                      | Homodimer             | 121.2                                               | 99.0  | 79.1  | 10.9                                                            | 8.9   | 7.1   |
| P42590          | YgjI         | Cell inner membrane  | Monomer               | 90.3                                                | 76.3  | 58.9  | 5.5                                                             | 4.6   | 3.6   |
|                 |              |                      | Complex with SecB     | 64.9                                                | 53.0  | 42.3  | 2.3                                                             | 1.9   | 1.5   |
|                 |              |                      | Complex with TF (Tig) | 69.9                                                | 59.0  | 45.6  | 2.8                                                             | 2.4   | 1.9   |
| P42591          | YgjJ         |                      | Monomer               | 100.1                                               | 84.6  | 65.3  | 7.0                                                             | 5.9   | 4.6   |
| P42592          | YgjK         |                      | Monomer               | 73.4                                                | 62.0  | 47.9  | 3.2                                                             | 2.7   | 2.1   |
| P42597          | YgjP         |                      | Monomer               | 132.8                                               | 112.2 | 86.7  | 13.4                                                            | 11.3  | 8.8   |
| P42598          | YgjQ         | Membrane             | Monomer               | 119.6                                               | 101.0 | 78.0  | 10.6                                                            | 9.0   | 6.9   |
|                 |              |                      | Complex with SecB     | 71.5                                                | 58.4  | 46.7  | 3.0                                                             | 2.5   | 2.0   |
|                 |              |                      | Complex with TF (Tig) | 78.9                                                | 66.6  | 51.5  | 3.9                                                             | 3.3   | 2.5   |
| P42599          | YgjR         | Membrane             | Monomer               | 104.2                                               | 88.0  | 68.0  | 7.7                                                             | 6.5   | 5.0   |
|                 |              |                      | Complex with SecB     | 68.5                                                | 56.0  | 44.7  | 2.7                                                             | 2.2   | 1.8   |
|                 |              |                      | Complex with TF (Tig) | 74.8                                                | 63.2  | 48.8  | 3.4                                                             | 2.9   | 2.2   |
| P42603          | YgjV         | Cell inner membrane  | Monomer               | 130.2                                               | 110.0 | 84.9  | 12.8                                                            | 10.9  | 8.4   |
|                 |              |                      | Complex with SecB     | 73.0                                                | 59.7  | 47.7  | 3.2                                                             | 2.6   | 2.1   |
|                 |              |                      | Complex with TF (Tig) | 81.0                                                | 68.5  | 52.9  | 4.2                                                             | 3.5   | 2.7   |
| P11865          | YhaB         |                      | Monomer               | 130.0                                               | 109.8 | 84.8  | 12.8                                                            | 10.8  | 8.4   |
| P11864          | YhaC         |                      | Monomer               | 95.5                                                | 80.6  | 62.3  | 6.3                                                             | 5.3   | 4.1   |
| P64590          | YhaH         | Cell inner membrane  | Monomer               | 150.0                                               | 126.7 | 97.9  | 17.5                                                            | 14.8  | 11.4  |
|                 |              |                      | Complex with SecB     | 75.1                                                | 61.4  | 49.0  | 3.4                                                             | 2.8   | 2.2   |
|                 |              |                      | Complex with TF (Tig) | 84.1                                                | 71.1  | 54.9  | 4.6                                                             | 3.9   | 3.0   |
| P64592          | YhaI         | Cell inner membrane  | Monomer               | 153.6                                               | 129.7 | 100.2 | 18.4                                                            | 15.5  | 12.0  |
|                 |              |                      | Complex with SecB     | 75.4                                                | 61.6  | 49.2  | 3.5                                                             | 2.8   | 2.3   |
|                 |              |                      | Complex with TF (Tig) | 84.6                                                | 71.4  | 55.2  | 4.6                                                             | 3.9   | 3.0   |
| P67660          | YhaJ         |                      | Monomer               | 107.7                                               | 91.0  | 70.3  | 8.4                                                             | 7.1   | 5.5   |
| P42624          | YhaK         | Cytoplasm            | Monomer               | 118.8                                               | 100.4 | 77.5  | 10.5                                                            | 8.8   | 6.8   |
| P42625          | YhaL         |                      | Monomer               | 211.3                                               | 178.5 | 137.9 | 35.0                                                            | 29.6  | 22.9  |
| P42626          | YhaM         |                      | Monomer               | 95.4                                                | 80.6  | 62.2  | 6.3                                                             | 5.3   | 4.1   |
| P42628          | YhaO         | Cell inner membrane  | Monomer               | 93.0                                                | 78.6  | 60.7  | 5.9                                                             | 5.0   | 3.8   |
|                 |              |                      | Complex with SecB     | 65.7                                                | 53.7  | 42.9  | 2.4                                                             | 2.0   | 1.6   |

| UniProtKB A. N. | Protein name | Subcellular location | Subunit               | $D_0 \left( \frac{\mu\text{m}^2}{\text{s}} \right)$ |       |       | $D_{\text{cyto}} \left( \frac{\mu\text{m}^2}{\text{s}} \right)$ |       |       |
|-----------------|--------------|----------------------|-----------------------|-----------------------------------------------------|-------|-------|-----------------------------------------------------------------|-------|-------|
|                 |              |                      |                       | 310 K                                               | 303 K | 293 K | 310 K                                                           | 303 K | 293 K |
|                 |              |                      | Complex with TF (Tig) | 70.9                                                | 59.9  | 46.3  | 3.0                                                             | 2.5   | 1.9   |
| P64594          | YhaV         |                      | Monomer               | 137.5                                               | 116.2 | 89.7  | 14.5                                                            | 12.2  | 9.5   |
|                 |              |                      | Homohexamer           | 68.1                                                | 55.7  | 44.5  | 2.7                                                             | 2.2   | 1.7   |
|                 |              |                      |                       |                                                     |       |       |                                                                 |       |       |
| P0AA73          | YhbE         | Cell inner membrane  | Monomer               | 105.6                                               | 89.2  | 68.9  | 8.0                                                             | 6.7   | 5.2   |
|                 |              |                      | Complex with SecB     | 68.9                                                | 56.3  | 44.9  | 2.7                                                             | 2.2   | 1.8   |
|                 |              |                      | Complex with TF (Tig) | 75.2                                                | 63.5  | 49.1  | 3.4                                                             | 2.9   | 2.2   |
| P0AFX0          | YhbH         |                      | Monomer               | 167.7                                               | 141.7 | 109.4 | 22.1                                                            | 18.6  | 14.4  |
| P0A894          | YhbJ         |                      | Monomer               | 108.7                                               | 91.8  | 70.9  | 8.5                                                             | 7.2   | 5.6   |
| P45470          | YhbO         |                      | Monomer               | 134.5                                               | 113.7 | 87.8  | 13.8                                                            | 11.7  | 9.0   |
|                 |              |                      | Homodimer             | 102.5                                               | 83.8  | 66.9  | 7.4                                                             | 6.1   | 4.9   |
| P67762          | YhbP         |                      | Monomer               | 140.8                                               | 119.0 | 91.9  | 15.3                                                            | 12.9  | 10.0  |
| P45472          | YhbQ         |                      | Monomer               | 164.6                                               | 139.1 | 107.4 | 21.2                                                            | 17.9  | 13.9  |
| P63417          | YhbS         |                      | Monomer               | 135.5                                               | 114.4 | 88.4  | 14.0                                                            | 11.8  | 9.1   |
| P64599          | YhbT         |                      | Monomer               | 132.3                                               | 111.8 | 86.3  | 13.3                                                            | 11.3  | 8.7   |
| P45527          | YhbU         |                      | Monomer               | 103.2                                               | 87.2  | 67.4  | 7.6                                                             | 6.4   | 4.9   |
| P45475          | YhbV         |                      | Monomer               | 108.6                                               | 91.8  | 70.9  | 8.5                                                             | 7.2   | 5.6   |
| P0ADV5          | YhbW         |                      | Monomer               | 103.2                                               | 87.1  | 67.3  | 7.5                                                             | 6.4   | 4.9   |
| P42640          | YhbX         | Cell inner membrane  | Monomer               | 85.0                                                | 71.9  | 55.5  | 4.7                                                             | 4.0   | 3.1   |
|                 |              |                      | Complex with SecB     | 63.1                                                | 51.6  | 41.2  | 2.2                                                             | 1.8   | 1.4   |
|                 |              |                      | Complex with TF (Tig) | 67.6                                                | 57.1  | 44.1  | 2.6                                                             | 2.2   | 1.7   |
| P0AGK4          | YhbY         | Cytoplasm            | Monomer               | 167.5                                               | 141.5 | 109.3 | 22.0                                                            | 18.6  | 14.4  |
| P28722          | YhcA         | Periplasm            | Monomer               | 119.8                                               | 101.2 | 78.2  | 10.7                                                            | 9.0   | 7.0   |
|                 |              |                      | Complex with SecB     | 71.5                                                | 58.4  | 46.7  | 3.0                                                             | 2.5   | 2.0   |
|                 |              |                      | Complex with TF (Tig) | 78.9                                                | 66.7  | 51.5  | 3.9                                                             | 3.3   | 2.5   |
| P0ADW3          | YhcB         | Cell inner membrane  | Monomer               | 147.3                                               | 124.5 | 96.1  | 16.8                                                            | 14.2  | 11.0  |
|                 |              |                      | Complex with SecB     | 74.9                                                | 61.2  | 48.9  | 3.4                                                             | 2.8   | 2.2   |
|                 |              |                      | Complex with TF (Tig) | 83.8                                                | 70.8  | 54.7  | 4.5                                                             | 3.8   | 3.0   |
| P0ADW6          | YhcC         |                      | Monomer               | 106.0                                               | 89.6  | 69.2  | 8.1                                                             | 6.8   | 5.3   |
| P45420          | YhcD         | Cell outer membrane  | Monomer               | 74.1                                                | 62.6  | 48.4  | 3.3                                                             | 2.8   | 2.2   |
|                 |              |                      | Complex with SecB     | 58.9                                                | 48.1  | 38.4  | 1.8                                                             | 1.5   | 1.2   |
|                 |              |                      | Complex with TF (Tig) | 62.3                                                | 52.6  | 40.6  | 2.1                                                             | 1.8   | 1.4   |

| UniProtKB A. N. | Protein name | Subcellular location | Subunit               | $D_0 \left( \frac{\mu\text{m}^2}{\text{s}} \right)$ |       |       | $D_{\text{cyto}} \left( \frac{\mu\text{m}^2}{\text{s}} \right)$ |       |       |
|-----------------|--------------|----------------------|-----------------------|-----------------------------------------------------|-------|-------|-----------------------------------------------------------------|-------|-------|
|                 |              |                      |                       | 310 K                                               | 303 K | 293 K | 310 K                                                           | 303 K | 293 K |
| P45421          | YhcE         |                      | Monomer               | 133.6                                               | 112.9 | 87.2  | 13.6                                                            | 11.5  | 8.9   |
| P45422          | YhcF         |                      | Monomer               | 120.6                                               | 101.9 | 78.7  | 10.8                                                            | 9.2   | 7.1   |
| P45423          | YhcG         |                      | Monomer               | 97.1                                                | 82.1  | 63.4  | 6.5                                                             | 5.5   | 4.3   |
| P45424          | YhcH         |                      | Monomer               | 140.0                                               | 118.3 | 91.4  | 15.1                                                            | 12.7  | 9.8   |
| P64612          | YhcM         |                      | Monomer               | 97.3                                                | 82.2  | 63.5  | 6.6                                                             | 5.5   | 4.3   |
| P64614          | YhcN         | Periplasm            | Monomer               | 178.3                                               | 150.6 | 116.3 | 25.0                                                            | 21.1  | 16.3  |
|                 |              |                      | Complex with SecB     | 77.0                                                | 62.9  | 50.2  | 3.7                                                             | 3.0   | 2.4   |
|                 |              |                      | Complex with TF (Tig) | 87.0                                                | 73.5  | 56.8  | 5.0                                                             | 4.2   | 3.3   |
| P64616          | YhcO         |                      | Monomer               | 167.4                                               | 141.4 | 109.2 | 22.0                                                            | 18.6  | 14.3  |
| P25536          | YhdE         | Cytoplasm            | Monomer               | 127.8                                               | 107.9 | 83.4  | 12.3                                                            | 10.4  | 8.0   |
| P26646          | YhdH         | Cytoplasm            | Monomer               | 105.9                                               | 89.5  | 69.1  | 8.0                                                             | 6.8   | 5.2   |
|                 |              |                      | Homodimer             | 80.7                                                | 65.9  | 52.7  | 4.1                                                             | 3.4   | 2.7   |
| P28638          | YhdJ         |                      | Monomer               | 107.5                                               | 90.8  | 70.2  | 8.3                                                             | 7.0   | 5.4   |
| P36675          | YhdL         |                      | Monomer               | 186.7                                               | 157.8 | 121.9 | 27.5                                                            | 23.2  | 17.9  |
| P36677          | YhdN         |                      | Monomer               | 151.4                                               | 127.9 | 98.8  | 17.8                                                            | 15.1  | 11.6  |
| P46474          | YhdP         |                      | Monomer               | 61.5                                                | 51.9  | 40.1  | 2.0                                                             | 1.7   | 1.3   |
| P45566          | YhdT         | Cell membrane        | Monomer               | 179.0                                               | 151.2 | 116.8 | 25.2                                                            | 21.3  | 16.5  |
|                 |              |                      | Complex with SecB     | 77.0                                                | 62.9  | 50.3  | 3.7                                                             | 3.0   | 2.4   |
|                 |              |                      | Complex with TF (Tig) | 87.0                                                | 73.5  | 56.8  | 5.0                                                             | 4.2   | 3.3   |
| P64619          | YhdU         | Membrane             | Monomer               | 196.2                                               | 165.7 | 128.0 | 30.3                                                            | 25.6  | 19.8  |
|                 |              |                      | Complex with SecB     | 77.8                                                | 63.5  | 50.8  | 3.8                                                             | 3.1   | 2.5   |
|                 |              |                      | Complex with TF (Tig) | 88.2                                                | 74.5  | 57.5  | 5.2                                                             | 4.4   | 3.4   |
| P64622          | YhdV         | Cell membrane        | Monomer               | 193.6                                               | 163.6 | 126.3 | 29.5                                                            | 24.9  | 19.3  |
|                 |              |                      | Complex with SecB     | 77.7                                                | 63.5  | 50.7  | 3.7                                                             | 3.1   | 2.4   |
|                 |              |                      | Complex with TF (Tig) | 88.0                                                | 74.4  | 57.4  | 5.1                                                             | 4.3   | 3.4   |
| P45766          | YhdW         | Periplasm            | Monomer               | 103.3                                               | 87.2  | 67.4  | 7.6                                                             | 6.4   | 4.9   |
|                 |              |                      | Complex with SecB     | 68.3                                                | 55.8  | 44.6  | 2.7                                                             | 2.2   | 1.7   |
|                 |              |                      | Complex with TF (Tig) | 74.5                                                | 62.9  | 48.6  | 3.4                                                             | 2.8   | 2.2   |
| P45767          | YhdX         | Cell inner membrane  | Monomer               | 97.2                                                | 82.1  | 63.4  | 6.5                                                             | 5.5   | 4.3   |
|                 |              |                      | Complex with SecB     | 66.8                                                | 54.6  | 43.6  | 2.5                                                             | 2.1   | 1.6   |
|                 |              |                      | Complex with TF (Tig) | 72.5                                                | 61.2  | 47.3  | 3.1                                                             | 2.6   | 2.0   |

| UniProtKB A. N. | Protein name | Subcellular location | Subunit               | $D_0 \left( \frac{\mu\text{m}^2}{\text{s}} \right)$ |       |       | $D_{\text{cyto}} \left( \frac{\mu\text{m}^2}{\text{s}} \right)$ |       |       |
|-----------------|--------------|----------------------|-----------------------|-----------------------------------------------------|-------|-------|-----------------------------------------------------------------|-------|-------|
|                 |              |                      |                       | 310 K                                               | 303 K | 293 K | 310 K                                                           | 303 K | 293 K |
| P45768          | YhdY         | Cell inner membrane  | Monomer               | 98.8                                                | 83.4  | 64.5  | 6.8                                                             | 5.7   | 4.4   |
|                 |              |                      | Complex with SecB     | 67.3                                                | 54.9  | 43.9  | 2.6                                                             | 2.1   | 1.7   |
|                 |              |                      | Complex with TF (Tig) | 73.0                                                | 61.7  | 47.6  | 3.2                                                             | 2.7   | 2.1   |
| P45769          | YhdZ         | Cell inner membrane  | Monomer               | 114.3                                               | 96.6  | 74.6  | 9.6                                                             | 8.1   | 6.3   |
|                 |              |                      | Complex with SecB     | 70.6                                                | 57.7  | 46.1  | 2.9                                                             | 2.4   | 1.9   |
|                 |              |                      | Complex with TF (Tig) | 77.6                                                | 65.6  | 50.6  | 3.7                                                             | 3.2   | 2.4   |
| P64624          | YheO         |                      | Monomer               | 117.2                                               | 99.0  | 76.5  | 10.1                                                            | 8.6   | 6.6   |
| P63389          | YheS         |                      | Monomer               | 79.6                                                | 67.3  | 52.0  | 4.0                                                             | 3.4   | 2.6   |
| P45524          | YheT         |                      | Monomer               | 101.7                                               | 85.9  | 66.4  | 7.3                                                             | 6.2   | 4.8   |
| P67624          | YheU         |                      | Monomer               | 184.1                                               | 155.5 | 120.1 | 26.7                                                            | 22.5  | 17.4  |
| P0ADW8          | YheV         |                      | Monomer               | 192.1                                               | 162.3 | 125.4 | 29.1                                                            | 24.5  | 19.0  |
| P0ADX1          | YhfA         |                      | Monomer               | 149.1                                               | 125.9 | 97.3  | 17.2                                                            | 14.6  | 11.2  |
| P0ADX5          | YhfG         |                      | Monomer               | 203.0                                               | 171.5 | 132.5 | 32.4                                                            | 27.4  | 21.2  |
| P45537          | YhfK         | Cell membrane        | Monomer               | 76.4                                                | 64.5  | 49.8  | 3.6                                                             | 3.0   | 2.3   |
|                 |              |                      | Complex with SecB     | 59.8                                                | 48.9  | 39.0  | 1.9                                                             | 1.5   | 1.2   |
|                 |              |                      | Complex with TF (Tig) | 63.5                                                | 53.6  | 41.4  | 2.2                                                             | 1.9   | 1.4   |
| P64627          | YhfL         | Membrane             | Monomer               | 213.3                                               | 180.2 | 139.2 | 35.7                                                            | 30.1  | 23.3  |
|                 |              |                      | Complex with SecB     | 78.3                                                | 64.0  | 51.1  | 3.8                                                             | 3.1   | 2.5   |
|                 |              |                      | Complex with TF (Tig) | 89.1                                                | 75.2  | 58.1  | 5.3                                                             | 4.5   | 3.5   |
| P45545          | YhfS         |                      | Monomer               | 101.6                                               | 85.8  | 66.3  | 7.3                                                             | 6.1   | 4.7   |
| P45546          | YhfT         | Cell membrane        | Monomer               | 94.4                                                | 79.8  | 61.6  | 6.1                                                             | 5.2   | 4.0   |
|                 |              |                      | Complex with SecB     | 66.1                                                | 54.0  | 43.1  | 2.4                                                             | 2.0   | 1.6   |
|                 |              |                      | Complex with TF (Tig) | 71.5                                                | 60.4  | 46.6  | 3.0                                                             | 2.5   | 2.0   |
| P64631          | YhfU         |                      | Monomer               | 158.2                                               | 133.6 | 103.2 | 19.5                                                            | 16.5  | 12.7  |
| P45549          | YhfW         |                      | Monomer               | 96.0                                                | 81.1  | 62.7  | 6.4                                                             | 5.4   | 4.2   |
| P45550          | YhfX         |                      | Monomer               | 98.0                                                | 82.8  | 64.0  | 6.7                                                             | 5.6   | 4.4   |
| P45551          | YhfY         |                      | Monomer               | 153.2                                               | 129.5 | 100.0 | 18.3                                                            | 15.4  | 11.9  |
| P45552          | YhfZ         |                      | Monomer               | 107.4                                               | 90.7  | 70.1  | 8.3                                                             | 7.0   | 5.4   |
| P31667          | YhgA         |                      | Monomer               | 107.7                                               | 91.0  | 70.3  | 8.3                                                             | 7.1   | 5.4   |
| P45804          | YhgE         | Cell membrane        | Monomer               | 83.0                                                | 70.1  | 54.2  | 4.4                                                             | 3.7   | 2.9   |
|                 |              |                      | Complex with SecB     | 62.4                                                | 51.0  | 40.7  | 2.1                                                             | 1.7   | 1.4   |

| UniProtKB A. N. | Protein name | Subcellular location | Subunit               | $D_0 \left( \frac{\mu\text{m}^2}{\text{s}} \right)$ |       |       | $D_{\text{cyto}} \left( \frac{\mu\text{m}^2}{\text{s}} \right)$ |       |       |
|-----------------|--------------|----------------------|-----------------------|-----------------------------------------------------|-------|-------|-----------------------------------------------------------------|-------|-------|
|                 |              |                      |                       | 310 K                                               | 303 K | 293 K | 310 K                                                           | 303 K | 293 K |
|                 |              |                      | Complex with TF (Tig) | 66.7                                                | 56.4  | 43.5  | 2.5                                                             | 2.1   | 1.6   |
| P46837          | YhgF         |                      | Monomer               | 74.5                                                | 63.0  | 48.6  | 3.4                                                             | 2.8   | 2.2   |
|                 |              |                      | Monomer               | 127.8                                               | 108.0 | 83.4  | 12.3                                                            | 10.4  | 8.0   |
| P67143          | YhgN         | Cell inner membrane  | Complex with SecB     | 72.7                                                | 59.4  | 47.5  | 3.2                                                             | 2.6   | 2.1   |
|                 |              |                      | Complex with TF (Tig) | 80.6                                                | 68.1  | 52.6  | 4.1                                                             | 3.5   | 2.7   |
| P0ADX7          | YhhA         |                      | Monomer               | 141.4                                               | 119.4 | 92.2  | 15.4                                                            | 13.0  | 10.0  |
| P28911          | YhhH         |                      | Monomer               | 149.0                                               | 125.9 | 97.2  | 17.2                                                            | 14.6  | 11.2  |
| P28912          | YhhI         |                      | Monomer               | 97.3                                                | 82.2  | 63.5  | 6.6                                                             | 5.5   | 4.3   |
|                 |              |                      | Monomer               | 99.2                                                | 83.8  | 64.7  | 6.9                                                             | 5.8   | 4.5   |
| P0AGH1          | YhhJ         | Cell inner membrane  | Complex with SecB     | 67.4                                                | 55.0  | 44.0  | 2.6                                                             | 2.1   | 1.7   |
|                 |              |                      | Complex with TF (Tig) | 73.1                                                | 61.8  | 47.7  | 3.2                                                             | 2.7   | 2.1   |
| P37613          | YhhK         |                      | Monomer               | 149.1                                               | 126.0 | 97.3  | 17.2                                                            | 14.6  | 11.3  |
| P37614          | YhhL         |                      | Monomer               | 170.8                                               | 144.3 | 111.5 | 22.9                                                            | 19.4  | 15.0  |
| P37615          | YhhM         |                      | Monomer               | 153.4                                               | 129.6 | 100.1 | 18.3                                                            | 15.5  | 12.0  |
|                 |              |                      | Monomer               | 122.8                                               | 103.8 | 80.1  | 11.3                                                            | 9.5   | 7.4   |
| P0ADI9          | YhhN         | Cell membrane        | Complex with SecB     | 72.0                                                | 58.8  | 47.0  | 3.1                                                             | 2.5   | 2.0   |
|                 |              |                      | Complex with TF (Tig) | 79.6                                                | 67.2  | 51.9  | 4.0                                                             | 3.4   | 2.6   |
|                 |              |                      | Monomer               | 120.0                                               | 101.3 | 78.3  | 10.7                                                            | 9.0   | 7.0   |
| P37619          | YhhQ         | Cell inner membrane  | Complex with SecB     | 71.6                                                | 58.5  | 46.7  | 3.0                                                             | 2.5   | 2.0   |
|                 |              |                      | Complex with TF (Tig) | 78.9                                                | 66.7  | 51.5  | 3.9                                                             | 3.3   | 2.5   |
|                 |              |                      | Monomer               | 98.1                                                | 82.9  | 64.0  | 6.7                                                             | 5.7   | 4.4   |
| P37621          | YhhS         | Cell inner membrane  | Complex with SecB     | 67.1                                                | 54.8  | 43.8  | 2.5                                                             | 2.1   | 1.7   |
|                 |              |                      | Complex with TF (Tig) | 72.8                                                | 61.5  | 47.5  | 3.2                                                             | 2.7   | 2.1   |
|                 |              |                      | Monomer               | 101.7                                               | 85.9  | 66.4  | 7.3                                                             | 6.2   | 4.8   |
| P0AGM0          | YhhT         | Cell inner membrane  | Complex with SecB     | 68.0                                                | 55.5  | 44.4  | 2.6                                                             | 2.2   | 1.7   |
|                 |              |                      | Complex with TF (Tig) | 74.0                                                | 62.5  | 48.3  | 3.3                                                             | 2.8   | 2.2   |
| P46852          | YhhW         |                      | Monomer               | 118.1                                               | 99.8  | 77.1  | 10.3                                                            | 8.7   | 6.7   |
| P46853          | YhhX         |                      | Monomer               | 101.4                                               | 85.7  | 66.2  | 7.2                                                             | 6.1   | 4.7   |
| P46854          | YhhY         |                      | Monomer               | 134.7                                               | 113.8 | 87.9  | 13.9                                                            | 11.7  | 9.0   |
| P46855          | YhhZ         |                      | Monomer               | 96.3                                                | 81.4  | 62.9  | 6.4                                                             | 5.4   | 4.2   |
|                 |              |                      | Monomer               | 124.0                                               | 104.8 | 80.9  | 11.5                                                            | 9.7   | 7.5   |
| P0AFV2          | YhiD         | Cell inner membrane  |                       |                                                     |       |       |                                                                 |       |       |



| UniProtKB A. N. | Protein name | Subcellular location | Subunit               | $D_0 \left( \frac{\mu\text{m}^2}{\text{s}} \right)$ |       |       | $D_{\text{cyto}} \left( \frac{\mu\text{m}^2}{\text{s}} \right)$ |       |       |
|-----------------|--------------|----------------------|-----------------------|-----------------------------------------------------|-------|-------|-----------------------------------------------------------------|-------|-------|
|                 |              |                      |                       | 310 K                                               | 303 K | 293 K | 310 K                                                           | 303 K | 293 K |
|                 |              |                      | Complex with SecB     | 72.2                                                | 59.0  | 47.1  | 3.1                                                             | 2.5   | 2.0   |
|                 |              |                      | Complex with TF (Tig) | 79.8                                                | 67.4  | 52.1  | 4.0                                                             | 3.4   | 2.6   |
| P37624          | YhiH         | Cell inner membrane  | Monomer               | 69.7                                                | 58.9  | 45.5  | 2.8                                                             | 2.4   | 1.8   |
|                 |              |                      | Complex with SecB     | 56.8                                                | 46.4  | 37.1  | 1.6                                                             | 1.3   | 1.1   |
|                 |              |                      | Complex with TF (Tig) | 59.8                                                | 50.6  | 39.0  | 1.9                                                             | 1.6   | 1.2   |
| P37626          | YhiI         |                      | Monomer               | 101.4                                               | 85.6  | 66.1  | 7.2                                                             | 6.1   | 4.7   |
| P37627          | YhiJ         |                      | Monomer               | 84.8                                                | 71.7  | 55.4  | 4.7                                                             | 4.0   | 3.1   |
| P37629          | YhiL         |                      | Monomer               | 84.6                                                | 71.5  | 55.2  | 4.7                                                             | 3.9   | 3.0   |
| P37630          | YhiM         | Cell inner membrane  | Monomer               | 102.6                                               | 86.7  | 66.9  | 7.4                                                             | 6.3   | 4.9   |
|                 |              |                      | Complex with SecB     | 68.2                                                | 55.7  | 44.5  | 2.7                                                             | 2.2   | 1.7   |
|                 |              |                      | Complex with TF (Tig) | 74.3                                                | 62.7  | 48.5  | 3.3                                                             | 2.8   | 2.2   |
| P37631          | YhiN         |                      | Monomer               | 96.7                                                | 81.7  | 63.1  | 6.5                                                             | 5.5   | 4.2   |
| P68567          | YhiQ         |                      | Monomer               | 117.0                                               | 98.8  | 76.3  | 10.1                                                            | 8.5   | 6.6   |
| P37634          | YhiR         |                      | Monomer               | 109.4                                               | 92.4  | 71.4  | 8.7                                                             | 7.3   | 5.7   |
| P37635          | YhiS         |                      | Monomer               | 113.0                                               | 95.4  | 73.7  | 9.3                                                             | 7.9   | 6.1   |
| P37197          | YhjA         |                      | Monomer               | 90.7                                                | 76.6  | 59.2  | 5.5                                                             | 4.7   | 3.6   |
| P37640          | YhjB         |                      | Monomer               | 125.3                                               | 105.9 | 81.8  | 11.8                                                            | 10.0  | 7.7   |
| P37641          | YhjC         |                      | Monomer               | 107.6                                               | 90.9  | 70.2  | 8.3                                                             | 7.0   | 5.4   |
| P37642          | YhjD         | Cell inner membrane  | Monomer               | 102.3                                               | 86.4  | 66.8  | 7.4                                                             | 6.3   | 4.8   |
|                 |              |                      | Complex with SecB     | 68.1                                                | 55.7  | 44.5  | 2.7                                                             | 2.2   | 1.7   |
|                 |              |                      | Complex with TF (Tig) | 74.2                                                | 62.7  | 48.4  | 3.3                                                             | 2.8   | 2.2   |
| P37643          | YhjE         | Cell inner membrane  | Monomer               | 93.9                                                | 79.3  | 61.3  | 6.0                                                             | 5.1   | 3.9   |
|                 |              |                      | Complex with SecB     | 65.9                                                | 53.9  | 43.0  | 2.4                                                             | 2.0   | 1.6   |
|                 |              |                      | Complex with TF (Tig) | 71.3                                                | 60.2  | 46.5  | 3.0                                                             | 2.5   | 2.0   |
| P37645          | YhjG         | Cell membrane        | Monomer               | 78.5                                                | 66.3  | 51.2  | 3.9                                                             | 3.3   | 2.5   |
|                 |              |                      | Complex with SecB     | 60.7                                                | 49.6  | 39.6  | 1.9                                                             | 1.6   | 1.3   |
|                 |              |                      | Complex with TF (Tig) | 64.6                                                | 54.6  | 42.1  | 2.3                                                             | 1.9   | 1.5   |
| P37646          | YhjH         |                      | Monomer               | 112.7                                               | 95.2  | 73.6  | 9.3                                                             | 7.8   | 6.1   |
| P37648          | YhjJ         | Periplasm            | Monomer               | 88.1                                                | 74.4  | 57.5  | 5.1                                                             | 4.4   | 3.4   |
|                 |              |                      | Complex with SecB     | 64.2                                                | 52.4  | 41.9  | 2.3                                                             | 1.8   | 1.5   |
|                 |              |                      | Complex with TF (Tig) | 69.0                                                | 58.3  | 45.0  | 2.7                                                             | 2.3   | 1.8   |

| UniProtKB A. N. | Protein name | Subcellular location | Subunit               | $D_0 \left( \frac{\mu\text{m}^2}{\text{s}} \right)$ |       |       | $D_{\text{cyto}} \left( \frac{\mu\text{m}^2}{\text{s}} \right)$ |       |       |
|-----------------|--------------|----------------------|-----------------------|-----------------------------------------------------|-------|-------|-----------------------------------------------------------------|-------|-------|
|                 |              |                      |                       | 310 K                                               | 303 K | 293 K | 310 K                                                           | 303 K | 293 K |
| P37649          | YhjK         | Cell membrane        | Monomer               | 78.6                                                | 66.4  | 51.3  | 3.9                                                             | 3.3   | 2.5   |
|                 |              |                      | Complex with SecB     | 60.7                                                | 49.6  | 39.6  | 1.9                                                             | 1.6   | 1.3   |
|                 |              |                      | Complex with TF (Tig) | 64.6                                                | 54.6  | 42.1  | 2.3                                                             | 1.9   | 1.5   |
| P37655          | YhjQ         |                      | Monomer               | 115.4                                               | 97.5  | 75.3  | 9.8                                                             | 8.3   | 6.4   |
| P0ADJ3          | YhjR         |                      | Monomer               | 198.2                                               | 167.4 | 129.3 | 30.9                                                            | 26.1  | 20.2  |
| P37657          | YhjS         |                      | Monomer               | 85.8                                                | 72.5  | 56.0  | 4.8                                                             | 4.1   | 3.1   |
| P0ADJ5          | YhjT         |                      | Monomer               | 194.5                                               | 164.3 | 126.9 | 29.8                                                            | 25.2  | 19.4  |
| P37659          | YhjU         |                      | Monomer               | 84.4                                                | 71.3  | 55.0  | 4.6                                                             | 3.9   | 3.0   |
| P37660          | YhjV         | Cell inner membrane  | Monomer               | 93.9                                                | 79.3  | 61.2  | 6.0                                                             | 5.1   | 3.9   |
|                 |              |                      | Complex with SecB     | 65.9                                                | 53.9  | 43.0  | 2.4                                                             | 2.0   | 1.6   |
|                 |              |                      | Complex with TF (Tig) | 71.2                                                | 60.2  | 46.5  | 3.0                                                             | 2.5   | 2.0   |
| P37662          | YhjX         | Cell inner membrane  | Monomer               | 97.4                                                | 82.3  | 63.6  | 6.6                                                             | 5.6   | 4.3   |
|                 |              |                      | Complex with SecB     | 66.9                                                | 54.7  | 43.7  | 2.5                                                             | 2.1   | 1.6   |
|                 |              |                      | Complex with TF (Tig) | 72.5                                                | 61.3  | 47.3  | 3.1                                                             | 2.6   | 2.0   |
| P37663          | YhjY         |                      | Monomer               | 118.7                                               | 100.3 | 77.5  | 10.4                                                            | 8.8   | 6.8   |
| P0ADJ8          | YiaA         | Cell inner membrane  | Monomer               | 143.1                                               | 120.9 | 93.4  | 15.8                                                            | 13.3  | 10.3  |
|                 |              |                      | Complex with SecB     | 74.5                                                | 60.8  | 48.6  | 3.4                                                             | 2.7   | 2.2   |
|                 |              |                      | Complex with TF (Tig) | 83.2                                                | 70.3  | 54.3  | 4.5                                                             | 3.8   | 2.9   |
| P11286          | YiaB         | Cell inner membrane  | Monomer               | 157.8                                               | 133.3 | 103.0 | 19.4                                                            | 16.4  | 12.7  |
|                 |              |                      | Complex with SecB     | 75.7                                                | 61.9  | 49.4  | 3.5                                                             | 2.9   | 2.3   |
|                 |              |                      | Complex with TF (Tig) | 85.1                                                | 71.9  | 55.5  | 4.7                                                             | 4.0   | 3.1   |
| P37664          | YiaC         |                      | Monomer               | 139.8                                               | 118.1 | 91.2  | 15.0                                                            | 12.7  | 9.8   |
| P37665          | YiaD         | Cell inner membrane  | Monomer               | 126.2                                               | 106.6 | 82.4  | 12.0                                                            | 10.1  | 7.8   |
|                 |              |                      | Complex with SecB     | 72.5                                                | 59.2  | 47.3  | 3.1                                                             | 2.6   | 2.0   |
|                 |              |                      | Complex with TF (Tig) | 80.3                                                | 67.8  | 52.4  | 4.1                                                             | 3.4   | 2.7   |
| P0ADK0          | YiaF         |                      | Monomer               | 119.2                                               | 100.7 | 77.8  | 10.6                                                            | 8.9   | 6.9   |
| P0A9V5          | YiaG         |                      | Monomer               | 166.0                                               | 140.2 | 108.3 | 21.6                                                            | 18.3  | 14.1  |
| P37669          | YiaH         | Cell inner membrane  | Monomer               | 102.7                                               | 86.7  | 67.0  | 7.5                                                             | 6.3   | 4.9   |
|                 |              |                      | Complex with SecB     | 68.2                                                | 55.7  | 44.5  | 2.7                                                             | 2.2   | 1.7   |
|                 |              |                      | Complex with TF (Tig) | 74.3                                                | 62.8  | 48.5  | 3.3                                                             | 2.8   | 2.2   |
| P37671          | YiaJ         |                      | Monomer               | 110.6                                               | 93.5  | 72.2  | 8.9                                                             | 7.5   | 5.8   |

| UniProtKB A. N. | Protein name | Subcellular location | Subunit               | $D_0 \left( \frac{\mu\text{m}^2}{\text{s}} \right)$ |       |       | $D_{\text{cyto}} \left( \frac{\mu\text{m}^2}{\text{s}} \right)$ |       |       |
|-----------------|--------------|----------------------|-----------------------|-----------------------------------------------------|-------|-------|-----------------------------------------------------------------|-------|-------|
|                 |              |                      |                       | 310 K                                               | 303 K | 293 K | 310 K                                                           | 303 K | 293 K |
| P37673          | YiaL         |                      | Monomer               | 138.4                                               | 116.9 | 90.3  | 14.7                                                            | 12.4  | 9.6   |
| P37674          | YiaM         | Cell inner membrane  | Monomer               | 138.5                                               | 117.0 | 90.4  | 14.7                                                            | 12.4  | 9.6   |
|                 |              |                      | Complex with SecB     | 74.0                                                | 60.5  | 48.3  | 3.3                                                             | 2.7   | 2.2   |
|                 |              |                      | Complex with TF (Tig) | 82.5                                                | 69.7  | 53.8  | 4.4                                                             | 3.7   | 2.8   |
| P37675          | YiaN         | Cell inner membrane  | Monomer               | 95.4                                                | 80.6  | 62.2  | 6.3                                                             | 5.3   | 4.1   |
|                 |              |                      | Complex with SecB     | 66.3                                                | 54.2  | 43.3  | 2.5                                                             | 2.0   | 1.6   |
|                 |              |                      | Complex with TF (Tig) | 71.8                                                | 60.7  | 46.9  | 3.1                                                             | 2.6   | 2.0   |
| P37676          | YiaO         | Periplasm            | Monomer               | 104.4                                               | 88.2  | 68.2  | 7.8                                                             | 6.6   | 5.1   |
|                 |              |                      | Complex with SecB     | 68.6                                                | 56.1  | 44.8  | 2.7                                                             | 2.2   | 1.8   |
|                 |              |                      | Complex with TF (Tig) | 74.8                                                | 63.2  | 48.8  | 3.4                                                             | 2.9   | 2.2   |
| P37681          | YiaT         | Cell outer membrane  | Monomer               | 116.2                                               | 98.2  | 75.8  | 9.9                                                             | 8.4   | 6.5   |
|                 |              |                      | Complex with SecB     | 70.9                                                | 57.9  | 46.3  | 3.0                                                             | 2.4   | 1.9   |
|                 |              |                      | Complex with TF (Tig) | 78.1                                                | 65.9  | 50.9  | 3.8                                                             | 3.2   | 2.5   |
| P37682          | YiaU         |                      | Monomer               | 103.0                                               | 87.0  | 67.2  | 7.5                                                             | 6.4   | 4.9   |
| P37683          | YiaV         | Cell inner membrane  | Monomer               | 98.5                                                | 83.2  | 64.3  | 6.8                                                             | 5.7   | 4.4   |
|                 |              |                      | Complex with SecB     | 67.2                                                | 54.9  | 43.8  | 2.6                                                             | 2.1   | 1.7   |
|                 |              |                      | Complex with TF (Tig) | 72.9                                                | 61.6  | 47.6  | 3.2                                                             | 2.7   | 2.1   |
| P0ADK4          | YiaW         | Cell inner membrane  | Monomer               | 158.5                                               | 133.9 | 103.4 | 19.6                                                            | 16.6  | 12.8  |
|                 |              |                      | Complex with SecB     | 75.8                                                | 61.9  | 49.5  | 3.5                                                             | 2.9   | 2.3   |
|                 |              |                      | Complex with TF (Tig) | 85.1                                                | 71.9  | 55.6  | 4.7                                                             | 4.0   | 3.1   |
| P37686          | YiaY         |                      | Monomer               | 99.8                                                | 84.4  | 65.2  | 7.0                                                             | 5.9   | 4.6   |
| P0ADK6          | YibA         |                      | Monomer               | 109.5                                               | 92.5  | 71.5  | 8.7                                                             | 7.3   | 5.7   |
| P11290          | YibD         |                      | Monomer               | 99.7                                                | 84.2  | 65.0  | 7.0                                                             | 5.9   | 4.5   |
| P0ACA1          | YibF         |                      | Monomer               | 125.4                                               | 106.0 | 81.9  | 11.8                                                            | 10.0  | 7.7   |
| P32106          | YibG         |                      | Monomer               | 136.8                                               | 115.6 | 89.3  | 14.3                                                            | 12.1  | 9.3   |
| P0AFV0          | YibH         | Cell inner membrane  | Monomer               | 98.3                                                | 83.0  | 64.1  | 6.7                                                             | 5.7   | 4.4   |
|                 |              |                      | Complex with SecB     | 67.1                                                | 54.8  | 43.8  | 2.6                                                             | 2.1   | 1.7   |
|                 |              |                      | Complex with TF (Tig) | 72.8                                                | 61.5  | 47.5  | 3.2                                                             | 2.7   | 2.1   |
| P32108          | YibI         |                      | Monomer               | 151.8                                               | 128.2 | 99.0  | 17.9                                                            | 15.1  | 11.7  |
| P32109          | YibJ         |                      | Monomer               | 117.8                                               | 99.5  | 76.9  | 10.3                                                            | 8.7   | 6.7   |
| P0ADK8          | YibL         | Cytoplasm            | Monomer               | 152.5                                               | 128.8 | 99.5  | 18.1                                                            | 15.3  | 11.8  |

| UniProtKB A. N. | Protein name | Subcellular location | Subunit               | $D_0 \left( \frac{\mu\text{m}^2}{\text{s}} \right)$ |       |       | $D_{\text{cyto}} \left( \frac{\mu\text{m}^2}{\text{s}} \right)$ |       |       |
|-----------------|--------------|----------------------|-----------------------|-----------------------------------------------------|-------|-------|-----------------------------------------------------------------|-------|-------|
|                 |              |                      |                       | 310 K                                               | 303 K | 293 K | 310 K                                                           | 303 K | 293 K |
| P0AG27          | YibN         |                      | Monomer               | 144.9                                               | 122.4 | 94.6  | 16.2                                                            | 13.7  | 10.6  |
| P37691          | YibQ         |                      | Monomer               | 105.2                                               | 88.8  | 68.6  | 7.9                                                             | 6.7   | 5.2   |
| Q2M7R5          | YibT         |                      | Monomer               | 188.3                                               | 159.1 | 122.9 | 27.9                                                            | 23.6  | 18.2  |
| A5A625          | YibV         |                      | Monomer               | 158.9                                               | 134.2 | 103.7 | 19.7                                                            | 16.7  | 12.9  |
| P23839          | YicC         |                      | Monomer               | 107.8                                               | 91.1  | 70.4  | 8.4                                                             | 7.1   | 5.5   |
| P0AGM2          | YicG         | Cell inner membrane  | Monomer               | 126.5                                               | 106.9 | 82.6  | 12.1                                                            | 10.2  | 7.9   |
|                 |              |                      | Complex with SecB     | 72.5                                                | 59.3  | 47.3  | 3.1                                                             | 2.6   | 2.0   |
|                 |              |                      | Complex with TF (Tig) | 80.3                                                | 67.9  | 52.4  | 4.1                                                             | 3.5   | 2.7   |
| P31433          | YicH         |                      | Monomer               | 84.2                                                | 71.2  | 55.0  | 4.6                                                             | 3.9   | 3.0   |
| P31434          | YicI         |                      | Monomer               | 73.5                                                | 62.1  | 48.0  | 3.2                                                             | 2.7   | 2.1   |
|                 |              |                      | Homoheptamer          | 36.4                                                | 29.8  | 23.8  | 0.4                                                             | 0.3   | 0.3   |
| P31435          | YicJ         | Cell inner membrane  | Monomer               | 91.1                                                | 77.0  | 59.5  | 5.6                                                             | 4.7   | 3.7   |
|                 |              |                      | Complex with SecB     | 65.1                                                | 53.2  | 42.5  | 2.3                                                             | 1.9   | 1.5   |
|                 |              |                      | Complex with TF (Tig) | 70.2                                                | 59.3  | 45.8  | 2.9                                                             | 2.4   | 1.9   |
| P31437          | YicL         | Cell inner membrane  | Monomer               | 107.9                                               | 91.1  | 70.4  | 8.4                                                             | 7.1   | 5.5   |
|                 |              |                      | Complex with SecB     | 69.4                                                | 56.7  | 45.3  | 2.8                                                             | 2.3   | 1.8   |
|                 |              |                      | Complex with TF (Tig) | 75.9                                                | 64.1  | 49.5  | 3.5                                                             | 3.0   | 2.3   |
| P0ADL3          | YicN         |                      | Monomer               | 139.4                                               | 117.8 | 91.0  | 14.9                                                            | 12.6  | 9.7   |
| P31440          | YicO         | Cell inner membrane  | Monomer               | 94.1                                                | 79.5  | 61.4  | 6.1                                                             | 5.1   | 4.0   |
|                 |              |                      | Complex with SecB     | 66.0                                                | 53.9  | 43.1  | 2.4                                                             | 2.0   | 1.6   |
|                 |              |                      | Complex with TF (Tig) | 71.3                                                | 60.3  | 46.6  | 3.0                                                             | 2.5   | 2.0   |
| P25531          | YicR         |                      | Monomer               | 119.8                                               | 101.2 | 78.2  | 10.7                                                            | 9.0   | 7.0   |
| Q2M7X4          | YicS         |                      | Monomer               | 165.8                                               | 140.1 | 108.2 | 21.5                                                            | 18.2  | 14.1  |
| P0A8Y5          | YidA         |                      | Monomer               | 112.6                                               | 95.1  | 73.5  | 9.3                                                             | 7.8   | 6.0   |
| P09996          | YidB         |                      | Monomer               | 152.1                                               | 128.5 | 99.3  | 18.0                                                            | 15.2  | 11.7  |
| P0A8C8          | YidD         |                      | Monomer               | 176.9                                               | 149.4 | 115.4 | 24.6                                                            | 20.8  | 16.1  |
| P60872          | YidE         | Cell membrane        | Monomer               | 86.1                                                | 72.7  | 56.2  | 4.9                                                             | 4.1   | 3.2   |
|                 |              |                      | Complex with SecB     | 63.5                                                | 51.9  | 41.4  | 2.2                                                             | 1.8   | 1.4   |
|                 |              |                      | Complex with TF (Tig) | 68.1                                                | 57.5  | 44.4  | 2.7                                                             | 2.2   | 1.7   |
| P31443          | YidF         |                      | Monomer               | 133.6                                               | 112.9 | 87.2  | 13.6                                                            | 11.5  | 8.9   |
| P0ADL6          | YidG         | Cell inner membrane  | Monomer               | 152.2                                               | 128.6 | 99.3  | 18.0                                                            | 15.2  | 11.8  |

| UniProtKB A. N. | Protein name | Subcellular location | Subunit               | $D_0 \left( \frac{\mu\text{m}^2}{\text{s}} \right)$ |       |       | $D_{\text{cyto}} \left( \frac{\mu\text{m}^2}{\text{s}} \right)$ |       |       |
|-----------------|--------------|----------------------|-----------------------|-----------------------------------------------------|-------|-------|-----------------------------------------------------------------|-------|-------|
|                 |              |                      |                       | 310 K                                               | 303 K | 293 K | 310 K                                                           | 303 K | 293 K |
|                 |              |                      | Complex with SecB     | 75.3                                                | 61.5  | 49.1  | 3.5                                                             | 2.8   | 2.3   |
|                 |              |                      | Complex with TF (Tig) | 84.4                                                | 71.3  | 55.1  | 4.6                                                             | 3.9   | 3.0   |
| P0ADM0          | YidH         | Cell inner membrane  | Monomer               | 156.7                                               | 132.4 | 102.3 | 19.2                                                            | 16.2  | 12.5  |
|                 |              |                      | Complex with SecB     | 75.7                                                | 61.8  | 49.4  | 3.5                                                             | 2.9   | 2.3   |
|                 |              |                      | Complex with TF (Tig) | 84.9                                                | 71.8  | 55.4  | 4.7                                                             | 4.0   | 3.1   |
| P31446          | YidI         | Cell inner membrane  | Monomer               | 144.5                                               | 122.0 | 94.3  | 16.1                                                            | 13.6  | 10.5  |
|                 |              |                      | Complex with SecB     | 74.6                                                | 61.0  | 48.7  | 3.4                                                             | 2.8   | 2.2   |
|                 |              |                      | Complex with TF (Tig) | 83.4                                                | 70.4  | 54.4  | 4.5                                                             | 3.8   | 2.9   |
| P31447          | YidJ         |                      | Monomer               | 87.0                                                | 73.5  | 56.8  | 5.0                                                             | 4.2   | 3.3   |
| P31448          | YidK         | Cell inner membrane  | Monomer               | 84.3                                                | 71.2  | 55.0  | 4.6                                                             | 3.9   | 3.0   |
|                 |              |                      | Complex with SecB     | 62.9                                                | 51.4  | 41.0  | 2.1                                                             | 1.7   | 1.4   |
|                 |              |                      | Complex with TF (Tig) | 67.3                                                | 56.9  | 43.9  | 2.6                                                             | 2.2   | 1.7   |
| P31449          | YidL         |                      | Monomer               | 106.8                                               | 90.3  | 69.7  | 8.2                                                             | 6.9   | 5.3   |
| P31453          | YidP         |                      | Monomer               | 116.3                                               | 98.3  | 75.9  | 10.0                                                            | 8.4   | 6.5   |
| P0ADM4          | YidQ         |                      | Monomer               | 161.5                                               | 136.5 | 105.4 | 20.4                                                            | 17.2  | 13.3  |
| P31455          | YidR         |                      | Monomer               | 94.7                                                | 80.0  | 61.8  | 6.1                                                             | 5.2   | 4.0   |
| P0ADM6          | YidX         | Membrane             | Monomer               | 122.1                                               | 103.1 | 79.7  | 11.1                                                            | 9.4   | 7.3   |
|                 |              |                      | Complex with SecB     | 71.9                                                | 58.7  | 46.9  | 3.1                                                             | 2.5   | 2.0   |
|                 |              |                      | Complex with TF (Tig) | 79.4                                                | 67.1  | 51.8  | 4.0                                                             | 3.3   | 2.6   |
| P31463          | YidZ         |                      | Monomer               | 103.4                                               | 87.4  | 67.5  | 7.6                                                             | 6.4   | 5.0   |
| P0ADM8          | YieE         |                      | Monomer               | 115.8                                               | 97.8  | 75.6  | 9.9                                                             | 8.3   | 6.4   |
| P0AGE6          | YieF         |                      | Monomer               | 130.5                                               | 110.3 | 85.2  | 12.9                                                            | 10.9  | 8.4   |
| P31467          | YieH         |                      | Monomer               | 121.1                                               | 102.3 | 79.0  | 10.9                                                            | 9.2   | 7.1   |
| P31470          | YieK         |                      | Monomer               | 118.1                                               | 99.8  | 77.1  | 10.3                                                            | 8.7   | 6.7   |
| P31471          | YieL         |                      | Monomer               | 97.6                                                | 82.5  | 63.7  | 6.6                                                             | 5.6   | 4.3   |
| P31475          | YieP         |                      | Monomer               | 118.5                                               | 100.1 | 77.3  | 10.4                                                            | 8.8   | 6.8   |
| P22787          | YifB         |                      | Monomer               | 88.3                                                | 74.6  | 57.6  | 5.2                                                             | 4.4   | 3.4   |
| P0ADN2          | YifE         |                      | Monomer               | 155.0                                               | 131.0 | 101.2 | 18.7                                                            | 15.8  | 12.2  |
| P27837          | YifK         | Cell inner membrane  | Monomer               | 91.5                                                | 77.3  | 59.7  | 5.7                                                             | 4.8   | 3.7   |
|                 |              |                      | Complex with SecB     | 65.2                                                | 53.3  | 42.6  | 2.4                                                             | 1.9   | 1.5   |
|                 |              |                      | Complex with TF (Tig) | 70.3                                                | 59.4  | 45.9  | 2.9                                                             | 2.4   | 1.9   |

| UniProtKB A. N. | Protein name | Subcellular location | Subunit               | $D_0 \left( \frac{\mu\text{m}^2}{\text{s}} \right)$ |       |       | $D_{\text{cyto}} \left( \frac{\mu\text{m}^2}{\text{s}} \right)$ |       |       |
|-----------------|--------------|----------------------|-----------------------|-----------------------------------------------------|-------|-------|-----------------------------------------------------------------|-------|-------|
|                 |              |                      |                       | 310 K                                               | 303 K | 293 K | 310 K                                                           | 303 K | 293 K |
| P0ADN6          | YifL         | Cell membrane        | Monomer               | 196.5                                               | 166.0 | 128.2 | 30.4                                                            | 25.7  | 19.8  |
|                 |              |                      | Complex with SecB     | 77.8                                                | 63.5  | 50.8  | 3.8                                                             | 3.1   | 2.5   |
|                 |              |                      | Complex with TF (Tig) | 88.2                                                | 74.5  | 57.6  | 5.2                                                             | 4.4   | 3.4   |
| P56259          | YifN         |                      | Monomer               | 140.5                                               | 118.7 | 91.7  | 15.2                                                            | 12.8  | 9.9   |
| P23305          | YigA         |                      | Monomer               | 117.3                                               | 99.1  | 76.6  | 10.2                                                            | 8.6   | 6.6   |
| P0ADP0          | YigB         |                      | Monomer               | 116.7                                               | 98.6  | 76.1  | 10.0                                                            | 8.5   | 6.6   |
| P27840          | YigE         |                      | Monomer               | 115.4                                               | 97.5  | 75.3  | 9.8                                                             | 8.3   | 6.4   |
| P27842          | YigF         |                      | Monomer               | 148.9                                               | 125.8 | 97.2  | 17.2                                                            | 14.5  | 11.2  |
| P27843          | YigG         | Cell inner membrane  | Monomer               | 149.5                                               | 126.3 | 97.6  | 17.3                                                            | 14.7  | 11.3  |
|                 |              |                      | Complex with SecB     | 75.1                                                | 61.3  | 49.0  | 3.4                                                             | 2.8   | 2.2   |
|                 |              |                      | Complex with TF (Tig) | 84.1                                                | 71.0  | 54.9  | 4.6                                                             | 3.9   | 3.0   |
| P0ADP2          | YigI         |                      | Monomer               | 139.6                                               | 117.9 | 91.1  | 15.0                                                            | 12.6  | 9.8   |
| P27848          | YigL         |                      | Monomer               | 112.6                                               | 95.1  | 73.5  | 9.3                                                             | 7.8   | 6.0   |
| P0ADP5          | YigM         | Cell membrane        | Monomer               | 107.1                                               | 90.5  | 69.9  | 8.2                                                             | 7.0   | 5.4   |
|                 |              |                      | Complex with SecB     | 69.2                                                | 56.5  | 45.2  | 2.8                                                             | 2.3   | 1.8   |
|                 |              |                      | Complex with TF (Tig) | 75.6                                                | 63.9  | 49.4  | 3.5                                                             | 3.0   | 2.3   |
| P0ADP7          | YigP         |                      | Monomer               | 126.3                                               | 106.7 | 82.4  | 12.0                                                            | 10.1  | 7.8   |
| P27862          | YigZ         |                      | Monomer               | 127.2                                               | 107.5 | 83.0  | 12.2                                                            | 10.3  | 8.0   |
| P0ADP9          | YihD         |                      | Monomer               | 170.7                                               | 144.2 | 111.4 | 22.9                                                            | 19.3  | 14.9  |
| P32128          | YihF         |                      | Monomer               | 90.0                                                | 76.0  | 58.7  | 5.4                                                             | 4.6   | 3.5   |
| P32129          | YihG         | Cell inner membrane  | Monomer               | 104.1                                               | 87.9  | 67.9  | 7.7                                                             | 6.5   | 5.0   |
|                 |              |                      | Complex with SecB     | 68.5                                                | 56.0  | 44.7  | 2.7                                                             | 2.2   | 1.8   |
|                 |              |                      | Complex with TF (Tig) | 74.7                                                | 63.1  | 48.8  | 3.4                                                             | 2.9   | 2.2   |
| P0A8H6          | YihI         |                      | Monomer               | 134.0                                               | 113.2 | 87.4  | 13.7                                                            | 11.6  | 8.9   |
|                 |              |                      | Homodimer             | 102.1                                               | 83.4  | 66.6  | 7.4                                                             | 6.0   | 4.8   |
| P0ACM9          | YihL         |                      | Monomer               | 117.0                                               | 98.8  | 76.3  | 10.1                                                            | 8.5   | 6.6   |
| P32134          | YihM         |                      | Monomer               | 103.4                                               | 87.3  | 67.4  | 7.6                                                             | 6.4   | 4.9   |
| P32135          | YihN         | Cell inner membrane  | Monomer               | 94.6                                                | 79.9  | 61.7  | 6.1                                                             | 5.2   | 4.0   |
|                 |              |                      | Complex with SecB     | 66.1                                                | 54.0  | 43.2  | 2.4                                                             | 2.0   | 1.6   |
|                 |              |                      | Complex with TF (Tig) | 71.5                                                | 60.4  | 46.7  | 3.0                                                             | 2.6   | 2.0   |
| P32136          | YihO         | Cell inner membrane  | Monomer               | 90.7                                                | 76.6  | 59.2  | 5.5                                                             | 4.7   | 3.6   |

| UniProtKB A. N. | Protein name | Subcellular location | Subunit               | $D_0 \left( \frac{\mu\text{m}^2}{\text{s}} \right)$ |       |       | $D_{\text{cyto}} \left( \frac{\mu\text{m}^2}{\text{s}} \right)$ |       |       |
|-----------------|--------------|----------------------|-----------------------|-----------------------------------------------------|-------|-------|-----------------------------------------------------------------|-------|-------|
|                 |              |                      |                       | 310 K                                               | 303 K | 293 K | 310 K                                                           | 303 K | 293 K |
|                 |              |                      | Complex with SecB     | 65.0                                                | 53.1  | 42.4  | 2.3                                                             | 1.9   | 1.5   |
|                 |              |                      | Complex with TF (Tig) | 70.0                                                | 59.2  | 45.7  | 2.9                                                             | 2.4   | 1.9   |
| P32137          | YihP         | Cell inner membrane  | Monomer               | 91.1                                                | 77.0  | 59.4  | 5.6                                                             | 4.7   | 3.6   |
|                 |              |                      | Complex with SecB     | 65.1                                                | 53.2  | 42.5  | 2.3                                                             | 1.9   | 1.5   |
|                 |              |                      | Complex with TF (Tig) | 70.2                                                | 59.3  | 45.8  | 2.9                                                             | 2.4   | 1.9   |
| P32138          | YihQ         |                      | Monomer               | 77.4                                                | 65.4  | 50.5  | 3.7                                                             | 3.1   | 2.4   |
| P32139          | YihR         |                      | Monomer               | 106.8                                               | 90.2  | 69.7  | 8.2                                                             | 6.9   | 5.3   |
| P32140          | YihS         |                      | Monomer               | 93.7                                                | 79.2  | 61.2  | 6.0                                                             | 5.1   | 3.9   |
| P32141          | YihT         |                      | Monomer               | 109.4                                               | 92.4  | 71.4  | 8.7                                                             | 7.3   | 5.6   |
| P0A9V8          | YihU         |                      | Monomer               | 110.5                                               | 93.4  | 72.1  | 8.9                                                             | 7.5   | 5.8   |
| P32143          | YihV         |                      | Monomer               | 109.7                                               | 92.7  | 71.6  | 8.7                                                             | 7.4   | 5.7   |
| P32144          | YihW         |                      | Monomer               | 114.4                                               | 96.7  | 74.7  | 9.6                                                             | 8.1   | 6.3   |
| P0A8Y3          | YihX         |                      | Monomer               | 125.0                                               | 105.6 | 81.6  | 11.7                                                            | 9.9   | 7.7   |
| P0A8K8          | YihY         | Cell inner membrane  | Monomer               | 108.2                                               | 91.4  | 70.6  | 8.4                                                             | 7.1   | 5.5   |
|                 |              |                      | Complex with SecB     | 69.4                                                | 56.7  | 45.3  | 2.8                                                             | 2.3   | 1.8   |
|                 |              |                      | Complex with TF (Tig) | 76.0                                                | 64.2  | 49.6  | 3.5                                                             | 3.0   | 2.3   |
| P0ADQ2          | YiiD         |                      | Monomer               | 103.2                                               | 87.2  | 67.3  | 7.6                                                             | 6.4   | 4.9   |
| P0ADQ5          | YiiE         |                      | Monomer               | 186.4                                               | 157.5 | 121.7 | 27.4                                                            | 23.1  | 17.9  |
| P0AFU6          | YiiF         |                      | Monomer               | 184.4                                               | 155.8 | 120.3 | 26.8                                                            | 22.6  | 17.5  |
| P32151          | YiiG         |                      | Monomer               | 100.9                                               | 85.2  | 65.8  | 7.2                                                             | 6.0   | 4.7   |
| P32157          | YiiM         |                      | Monomer               | 119.8                                               | 101.2 | 78.2  | 10.7                                                            | 9.0   | 7.0   |
| P32160          | YiiQ         |                      | Monomer               | 127.2                                               | 107.5 | 83.0  | 12.2                                                            | 10.3  | 8.0   |
| P0AF34          | YiiR         |                      | Monomer               | 141.6                                               | 119.6 | 92.4  | 15.4                                                            | 13.0  | 10.1  |
| P32162          | YiiS         |                      | Monomer               | 167.5                                               | 141.5 | 109.3 | 22.0                                                            | 18.6  | 14.4  |
| P32167          | YiiX         |                      | Monomer               | 124.2                                               | 104.9 | 81.0  | 11.6                                                            | 9.8   | 7.5   |
| P0AF40          | YijD         | Cell inner membrane  | Monomer               | 155.5                                               | 131.4 | 101.5 | 18.9                                                            | 15.9  | 12.3  |
|                 |              |                      | Complex with SecB     | 75.6                                                | 61.7  | 49.3  | 3.5                                                             | 2.9   | 2.3   |
|                 |              |                      | Complex with TF (Tig) | 84.8                                                | 71.6  | 55.3  | 4.7                                                             | 4.0   | 3.1   |
| P0ABT8          | YijE         | Cell inner membrane  | Monomer               | 108.2                                               | 91.4  | 70.6  | 8.4                                                             | 7.1   | 5.5   |
|                 |              |                      | Complex with SecB     | 69.4                                                | 56.7  | 45.3  | 2.8                                                             | 2.3   | 1.8   |
|                 |              |                      | Complex with TF (Tig) | 76.0                                                | 64.2  | 49.6  | 3.5                                                             | 3.0   | 2.3   |

| UniProtKB A. N. | Protein name | Subcellular location | Subunit               | $D_0 \left( \frac{\mu\text{m}^2}{\text{s}} \right)$ |       |       | $D_{\text{cyto}} \left( \frac{\mu\text{m}^2}{\text{s}} \right)$ |       |       |
|-----------------|--------------|----------------------|-----------------------|-----------------------------------------------------|-------|-------|-----------------------------------------------------------------|-------|-------|
|                 |              |                      |                       | 310 K                                               | 303 K | 293 K | 310 K                                                           | 303 K | 293 K |
| P32668          | YijF         |                      | Monomer               | 124.6                                               | 105.2 | 81.3  | 11.6                                                            | 9.8   | 7.6   |
| P32677          | YijO         |                      | Monomer               | 109.1                                               | 92.2  | 71.2  | 8.6                                                             | 7.3   | 5.6   |
| P09162          | YjaA         |                      | Monomer               | 149.3                                               | 126.2 | 97.5  | 17.3                                                            | 14.6  | 11.3  |
| P09163          | YjaB         |                      | Monomer               | 141.9                                               | 119.9 | 92.6  | 15.5                                                            | 13.1  | 10.1  |
| P32680          | YjaG         |                      | Monomer               | 125.3                                               | 105.8 | 81.8  | 11.8                                                            | 10.0  | 7.7   |
| P32681          | YjaH         |                      | Monomer               | 118.1                                               | 99.7  | 77.0  | 10.3                                                            | 8.7   | 6.7   |
| P0AF43          | YjbB         | Cell membrane        | Monomer               | 85.8                                                | 72.5  | 56.0  | 4.8                                                             | 4.1   | 3.1   |
|                 |              |                      | Complex with SecB     | 63.4                                                | 51.8  | 41.4  | 2.2                                                             | 1.8   | 1.4   |
|                 |              |                      | Complex with TF (Tig) | 68.0                                                | 57.4  | 44.3  | 2.6                                                             | 2.2   | 1.7   |
| P32685          | YjbD         |                      | Monomer               | 169.0                                               | 142.8 | 110.3 | 22.4                                                            | 18.9  | 14.6  |
| P0AF45          | YjbE         |                      | Monomer               | 194.3                                               | 164.1 | 126.8 | 29.7                                                            | 25.1  | 19.4  |
| P32687          | YjbF         | Cell membrane        | Monomer               | 122.9                                               | 103.8 | 80.2  | 11.3                                                            | 9.5   | 7.4   |
|                 |              |                      | Complex with SecB     | 72.0                                                | 58.8  | 47.0  | 3.1                                                             | 2.5   | 2.0   |
|                 |              |                      | Complex with TF (Tig) | 79.6                                                | 67.2  | 51.9  | 4.0                                                             | 3.4   | 2.6   |
| P32688          | YjbG         |                      | Monomer               | 118.1                                               | 99.8  | 77.1  | 10.3                                                            | 8.7   | 6.7   |
| P32689          | YjbH         | Cell membrane        | Monomer               | 76.9                                                | 65.0  | 50.2  | 3.7                                                             | 3.1   | 2.4   |
|                 |              |                      | Complex with SecB     | 60.1                                                | 49.1  | 39.2  | 1.9                                                             | 1.5   | 1.2   |
|                 |              |                      | Complex with TF (Tig) | 63.8                                                | 53.9  | 41.6  | 2.2                                                             | 1.9   | 1.4   |
| P32690          | YjbI         |                      | Monomer               | 90.6                                                | 76.5  | 59.1  | 5.5                                                             | 4.7   | 3.6   |
| P68206          | YjbJ         |                      | Monomer               | 185.4                                               | 156.6 | 121.0 | 27.1                                                            | 22.9  | 17.7  |
| P32693          | YjbL         |                      | Monomer               | 174.2                                               | 147.2 | 113.7 | 23.9                                                            | 20.2  | 15.6  |
| P32694          | YjbM         |                      | Monomer               | 117.4                                               | 99.2  | 76.6  | 10.2                                                            | 8.6   | 6.7   |
| P0AF48          | YjbQ         |                      | Monomer               | 144.7                                               | 122.3 | 94.4  | 16.2                                                            | 13.7  | 10.6  |
| P0AF50          | YjbR         |                      | Monomer               | 153.3                                               | 129.5 | 100.0 | 18.3                                                            | 15.5  | 11.9  |
| P58036          | YjbS         |                      | Monomer               | 189.3                                               | 159.9 | 123.5 | 28.2                                                            | 23.8  | 18.4  |
| A5A628          | YjbT         |                      | Monomer               | 172.2                                               | 145.5 | 112.4 | 23.3                                                            | 19.7  | 15.2  |
| P32700          | YjcB         |                      | Monomer               | 170.5                                               | 144.0 | 111.3 | 22.8                                                            | 19.3  | 14.9  |
| P32701          | YjcC         | Cell inner membrane  | Monomer               | 85.0                                                | 71.8  | 55.5  | 4.7                                                             | 4.0   | 3.1   |
|                 |              |                      | Complex with SecB     | 63.1                                                | 51.6  | 41.2  | 2.2                                                             | 1.8   | 1.4   |
|                 |              |                      | Complex with TF (Tig) | 67.6                                                | 57.1  | 44.1  | 2.6                                                             | 2.2   | 1.7   |
| P0AF52          | YjcD         | Cell inner membrane  | Monomer               | 95.1                                                | 80.3  | 62.0  | 6.2                                                             | 5.2   | 4.1   |



| UniProtKB A. N. | Protein name | Subcellular location | Subunit               | $D_0 \left( \frac{\mu\text{m}^2}{\text{s}} \right)$ |       |       | $D_{\text{cyto}} \left( \frac{\mu\text{m}^2}{\text{s}} \right)$ |       |       |
|-----------------|--------------|----------------------|-----------------------|-----------------------------------------------------|-------|-------|-----------------------------------------------------------------|-------|-------|
|                 |              |                      |                       | 310 K                                               | 303 K | 293 K | 310 K                                                           | 303 K | 293 K |
|                 |              |                      | Complex with SecB     | 66.3                                                | 54.1  | 43.2  | 2.5                                                             | 2.0   | 1.6   |
|                 |              |                      | Complex with TF (Tig) | 71.7                                                | 60.6  | 46.8  | 3.0                                                             | 2.6   | 2.0   |
| P32703          | YjcE         | Cell inner membrane  | Monomer               | 85.2                                                | 72.0  | 55.6  | 4.7                                                             | 4.0   | 3.1   |
|                 |              |                      | Complex with SecB     | 63.2                                                | 51.6  | 41.2  | 2.2                                                             | 1.8   | 1.4   |
|                 |              |                      | Complex with TF (Tig) | 67.7                                                | 57.2  | 44.2  | 2.6                                                             | 2.2   | 1.7   |
| P32704          | YjcF         |                      | Monomer               | 92.3                                                | 77.9  | 60.2  | 5.8                                                             | 4.9   | 3.8   |
|                 |              |                      | Monomer               | 162.4                                               | 137.2 | 106.0 | 20.6                                                            | 17.4  | 13.5  |
| P0AF54          | YjcH         | Cell inner membrane  | Complex with SecB     | 76.1                                                | 62.1  | 49.6  | 3.5                                                             | 2.9   | 2.3   |
|                 |              |                      | Complex with TF (Tig) | 85.5                                                | 72.3  | 55.8  | 4.8                                                             | 4.0   | 3.1   |
| P0AF56          | YjcO         |                      | Monomer               | 120.3                                               | 101.6 | 78.5  | 10.8                                                            | 9.1   | 7.0   |
| P32717          | YjcS         |                      | Monomer               | 79.1                                                | 66.8  | 51.6  | 3.9                                                             | 3.3   | 2.6   |
| P39267          | YjcZ         |                      | Monomer               | 108.2                                               | 91.4  | 70.6  | 8.4                                                             | 7.1   | 5.5   |
| P16694          | YjdA         |                      | Monomer               | 74.8                                                | 63.2  | 48.8  | 3.4                                                             | 2.9   | 2.2   |
| P0ACU7          | YjdC         |                      | Monomer               | 126.8                                               | 107.1 | 82.7  | 12.1                                                            | 10.2  | 7.9   |
|                 |              |                      | Monomer               | 123.5                                               | 104.4 | 80.6  | 11.4                                                            | 9.7   | 7.5   |
| P39270          | YjdF         | Cell inner membrane  | Complex with SecB     | 72.1                                                | 58.9  | 47.1  | 3.1                                                             | 2.5   | 2.0   |
|                 |              |                      | Complex with TF (Tig) | 79.7                                                | 67.4  | 52.0  | 4.0                                                             | 3.4   | 2.6   |
| P0AF59          | YjdI         |                      | Monomer               | 183.4                                               | 155.0 | 119.7 | 26.5                                                            | 22.4  | 17.3  |
| P39274          | YjdJ         |                      | Monomer               | 169.5                                               | 143.2 | 110.6 | 22.5                                                            | 19.0  | 14.7  |
| P0AF61          | YjdK         |                      | Monomer               | 163.5                                               | 138.1 | 106.7 | 20.9                                                            | 17.7  | 13.7  |
|                 |              |                      | Monomer               | 89.7                                                | 75.8  | 58.5  | 5.4                                                             | 4.5   | 3.5   |
| P39276          | YjdL         | Cell inner membrane  | Complex with SecB     | 64.7                                                | 52.8  | 42.2  | 2.3                                                             | 1.9   | 1.5   |
|                 |              |                      | Complex with TF (Tig) | 69.6                                                | 58.8  | 45.4  | 2.8                                                             | 2.4   | 1.8   |
|                 |              |                      | Monomer               | 203.6                                               | 172.0 | 132.8 | 32.6                                                            | 27.5  | 21.3  |
| P64646          | YjdO         | Cell membrane        | Complex with SecB     | 78.0                                                | 63.8  | 50.9  | 3.8                                                             | 3.1   | 2.5   |
|                 |              |                      | Complex with TF (Tig) | 88.6                                                | 74.8  | 57.8  | 5.2                                                             | 4.4   | 3.4   |
| Q6BEX5          | YjdP         |                      | Monomer               | 153.5                                               | 129.7 | 100.2 | 18.3                                                            | 15.5  | 12.0  |
| P0AF67          | YjeE         |                      | Monomer               | 140.6                                               | 118.8 | 91.7  | 15.2                                                            | 12.8  | 9.9   |
| P31806          | YjeF         |                      | Monomer               | 88.7                                                | 74.9  | 57.9  | 5.2                                                             | 4.4   | 3.4   |
|                 |              |                      | Monomer               | 95.9                                                | 81.0  | 62.6  | 6.3                                                             | 5.3   | 4.1   |
| P39277          | YjeH         | Cell inner membrane  | Complex with SecB     | 66.5                                                | 54.3  | 43.4  | 2.5                                                             | 2.0   | 1.6   |

| UniProtKB A. N. | Protein name | Subcellular location | Subunit               | $D_0 \left( \frac{\mu\text{m}^2}{\text{s}} \right)$ |       |       | $D_{\text{cyto}} \left( \frac{\mu\text{m}^2}{\text{s}} \right)$ |       |       |
|-----------------|--------------|----------------------|-----------------------|-----------------------------------------------------|-------|-------|-----------------------------------------------------------------|-------|-------|
|                 |              |                      |                       | 310 K                                               | 303 K | 293 K | 310 K                                                           | 303 K | 293 K |
|                 |              |                      | Complex with TF (Tig) | 72.0                                                | 60.8  | 47.0  | 3.1                                                             | 2.6   | 2.0   |
| P0AF70          | YjeI         |                      | Monomer               | 160.8                                               | 135.9 | 105.0 | 20.2                                                            | 17.1  | 13.2  |
| P39279          | YjeJ         |                      | Monomer               | 108.1                                               | 91.3  | 70.5  | 8.4                                                             | 7.1   | 5.5   |
| P39280          | YjeK         |                      | Monomer               | 101.4                                               | 85.7  | 66.2  | 7.3                                                             | 6.1   | 4.7   |
|                 |              |                      | Monomer               | 88.6                                                | 74.9  | 57.8  | 5.2                                                             | 4.4   | 3.4   |
| P39282          | YjeM         | Cell inner membrane  | Complex with SecB     | 64.3                                                | 52.6  | 42.0  | 2.3                                                             | 1.9   | 1.5   |
|                 |              |                      | Complex with TF (Tig) | 69.2                                                | 58.4  | 45.1  | 2.8                                                             | 2.3   | 1.8   |
| P39283          | YjeN         |                      | Monomer               | 161.6                                               | 136.5 | 105.4 | 20.4                                                            | 17.3  | 13.3  |
|                 |              |                      | Monomer               | 157.4                                               | 133.0 | 102.7 | 19.3                                                            | 16.3  | 12.6  |
| P39284          | YjeO         | Cell inner membrane  | Complex with SecB     | 75.7                                                | 61.8  | 49.4  | 3.5                                                             | 2.9   | 2.3   |
|                 |              |                      | Complex with TF (Tig) | 85.0                                                | 71.8  | 55.5  | 4.7                                                             | 4.0   | 3.1   |
|                 |              |                      | Monomer               | 64.3                                                | 54.3  | 42.0  | 2.3                                                             | 1.9   | 1.5   |
| P39285          | YjeP         | Cell membrane        | Complex with SecB     | 54.1                                                | 44.2  | 35.3  | 1.4                                                             | 1.1   | 0.9   |
|                 |              |                      | Complex with TF (Tig) | 56.5                                                | 47.8  | 36.9  | 1.6                                                             | 1.3   | 1.0   |
| P39288          | YjeS         |                      | Monomer               | 97.3                                                | 82.2  | 63.5  | 6.6                                                             | 5.5   | 4.3   |
|                 |              |                      | Monomer               | 196.6                                               | 166.1 | 128.3 | 30.4                                                            | 25.7  | 19.8  |
| P0AF73          | YjeT         | Cell membrane        | Complex with SecB     | 77.8                                                | 63.6  | 50.8  | 3.8                                                             | 3.1   | 2.5   |
|                 |              |                      | Complex with TF (Tig) | 88.2                                                | 74.5  | 57.6  | 5.2                                                             | 4.4   | 3.4   |
| C1P621          | YjeV         |                      | Monomer               | 320.7                                               | 271.0 | 209.3 | 75.7                                                            | 64.0  | 49.4  |
| P33222          | YjfC         |                      | Monomer               | 95.7                                                | 80.8  | 62.4  | 6.3                                                             | 5.3   | 4.1   |
|                 |              |                      | Monomer               | 105.6                                               | 89.2  | 68.9  | 8.0                                                             | 6.7   | 5.2   |
| P37772          | YjfF         | Cell inner membrane  | Complex with SecB     | 68.9                                                | 56.3  | 44.9  | 2.7                                                             | 2.2   | 1.8   |
|                 |              |                      | Complex with TF (Tig) | 75.2                                                | 63.5  | 49.1  | 3.4                                                             | 2.9   | 2.2   |
| P0AF76          | YjfI         |                      | Monomer               | 147.4                                               | 124.5 | 96.2  | 16.8                                                            | 14.2  | 11.0  |
| P0AF78          | YjfJ         |                      | Monomer               | 119.8                                               | 101.2 | 78.2  | 10.7                                                            | 9.0   | 7.0   |
| P39293          | YjfK         |                      | Monomer               | 120.4                                               | 101.8 | 78.6  | 10.8                                                            | 9.1   | 7.0   |
|                 |              |                      | Monomer               | 150.3                                               | 126.9 | 98.1  | 17.5                                                            | 14.8  | 11.4  |
| P0AF80          | YjfL         | Cell inner membrane  | Complex with SecB     | 75.1                                                | 61.4  | 49.0  | 3.4                                                             | 2.8   | 2.2   |
|                 |              |                      | Complex with TF (Tig) | 84.2                                                | 71.1  | 54.9  | 4.6                                                             | 3.9   | 3.0   |
| P39295          | YjfM         |                      | Monomer               | 123.7                                               | 104.5 | 80.7  | 11.5                                                            | 9.7   | 7.5   |
|                 |              |                      | Monomer               | 172.9                                               | 146.0 | 112.8 | 23.5                                                            | 19.8  | 15.3  |
| P0AF82          | YjfN         | Periplasm            |                       |                                                     |       |       |                                                                 |       |       |

| UniProtKB A. N. | Protein name | Subcellular location | Subunit               | $D_0 \left( \frac{\mu\text{m}^2}{\text{s}} \right)$ |       |       | $D_{\text{cyto}} \left( \frac{\mu\text{m}^2}{\text{s}} \right)$ |       |       |
|-----------------|--------------|----------------------|-----------------------|-----------------------------------------------------|-------|-------|-----------------------------------------------------------------|-------|-------|
|                 |              |                      |                       | 310 K                                               | 303 K | 293 K | 310 K                                                           | 303 K | 293 K |
|                 |              |                      | Complex with SecB     | 76.7                                                | 62.7  | 50.1  | 3.6                                                             | 3.0   | 2.4   |
|                 |              |                      | Complex with TF (Tig) | 86.5                                                | 73.1  | 56.5  | 4.9                                                             | 4.2   | 3.2   |
| P39298          | YjfP         |                      | Monomer               | 115.9                                               | 97.9  | 75.6  | 9.9                                                             | 8.4   | 6.5   |
|                 |              |                      | Monomer               | 171.5                                               | 144.9 | 111.9 | 23.1                                                            | 19.5  | 15.1  |
| P0AF86          | YjfY         | Periplasm            | Complex with SecB     | 76.6                                                | 62.6  | 50.0  | 3.6                                                             | 3.0   | 2.4   |
|                 |              |                      | Complex with TF (Tig) | 86.4                                                | 73.0  | 56.4  | 4.9                                                             | 4.1   | 3.2   |
|                 |              |                      | Monomer               | 112.5                                               | 95.1  | 73.4  | 9.2                                                             | 7.8   | 6.0   |
| P39308          | YjfZ         | Membrane             | Complex with SecB     | 70.3                                                | 57.4  | 45.9  | 2.9                                                             | 2.4   | 1.9   |
|                 |              |                      | Complex with TF (Tig) | 77.1                                                | 65.2  | 50.3  | 3.7                                                             | 3.1   | 2.4   |
| P0A8X0          | YjgA         | Cytoplasm            | Monomer               | 128.1                                               | 108.2 | 83.6  | 12.4                                                            | 10.5  | 8.1   |
| P27250          | YjgB         |                      | Monomer               | 103.8                                               | 87.7  | 67.8  | 7.7                                                             | 6.5   | 5.0   |
|                 |              |                      | Monomer               | 152.9                                               | 129.2 | 99.8  | 18.2                                                            | 15.4  | 11.9  |
| P0AF93          | YjgF         |                      | Homotrimer            | 99.4                                                | 81.2  | 64.9  | 6.9                                                             | 5.6   | 4.5   |
| P39332          | YjgH         |                      | Monomer               | 148.8                                               | 125.7 | 97.1  | 17.2                                                            | 14.5  | 11.2  |
| P39333          | YjgI         |                      | Monomer               | 121.2                                               | 102.4 | 79.1  | 11.0                                                            | 9.3   | 7.1   |
| P39334          | YjgJ         |                      | Monomer               | 127.8                                               | 108.0 | 83.4  | 12.3                                                            | 10.4  | 8.0   |
| P0AF96          | YjgK         |                      | Monomer               | 140.6                                               | 118.7 | 91.7  | 15.2                                                            | 12.8  | 9.9   |
| P39336          | YjgL         |                      | Monomer               | 80.6                                                | 68.1  | 52.6  | 4.1                                                             | 3.5   | 2.7   |
| P39337          | YjgM         |                      | Monomer               | 135.2                                               | 114.2 | 88.2  | 14.0                                                            | 11.8  | 9.1   |
|                 |              |                      | Monomer               | 95.8                                                | 80.9  | 62.5  | 6.3                                                             | 5.3   | 4.1   |
| P39338          | YjgN         | Cell inner membrane  | Complex with SecB     | 66.5                                                | 54.3  | 43.4  | 2.5                                                             | 2.0   | 1.6   |
|                 |              |                      | Complex with TF (Tig) | 71.9                                                | 60.8  | 46.9  | 3.1                                                             | 2.6   | 2.0   |
| P39342          | YjgR         |                      | Monomer               | 88.9                                                | 75.1  | 58.0  | 5.3                                                             | 4.4   | 3.4   |
| Q9Z3A0          | YjgW         |                      | Monomer               | 155.3                                               | 131.2 | 101.3 | 18.8                                                            | 15.9  | 12.3  |
|                 |              |                      | Monomer               | 98.6                                                | 83.3  | 64.3  | 6.8                                                             | 5.7   | 4.4   |
| P39349          | YjgX         | Cell membrane        | Complex with SecB     | 67.2                                                | 54.9  | 43.9  | 2.6                                                             | 2.1   | 1.7   |
|                 |              |                      | Complex with TF (Tig) | 73.0                                                | 61.6  | 47.6  | 3.2                                                             | 2.7   | 2.1   |
| P39351          | YjgZ         |                      | Monomer               | 159.8                                               | 135.0 | 104.3 | 20.0                                                            | 16.9  | 13.0  |
|                 |              |                      | Monomer               | 96.4                                                | 81.5  | 62.9  | 6.4                                                             | 5.4   | 4.2   |
| P39352          | YjhB         | Cell inner membrane  | Complex with SecB     | 66.6                                                | 54.4  | 43.5  | 2.5                                                             | 2.0   | 1.6   |
|                 |              |                      | Complex with TF (Tig) | 72.2                                                | 61.0  | 47.1  | 3.1                                                             | 2.6   | 2.0   |

| UniProtKB A. N. | Protein name | Subcellular location | Subunit               | $D_0 \left( \frac{\mu\text{m}^2}{\text{s}} \right)$ |       |       | $D_{\text{cyto}} \left( \frac{\mu\text{m}^2}{\text{s}} \right)$ |       |       |
|-----------------|--------------|----------------------|-----------------------|-----------------------------------------------------|-------|-------|-----------------------------------------------------------------|-------|-------|
|                 |              |                      |                       | 310 K                                               | 303 K | 293 K | 310 K                                                           | 303 K | 293 K |
| P39353          | YjhC         |                      | Monomer               | 98.9                                                | 83.5  | 64.5  | 6.8                                                             | 5.8   | 4.5   |
| P39354          | YjhD         |                      | Monomer               | 181.2                                               | 153.1 | 118.3 | 25.8                                                            | 21.8  | 16.9  |
| P39355          | YjhE         | Cell membrane        | Monomer               | 182.1                                               | 153.8 | 118.8 | 26.1                                                            | 22.0  | 17.0  |
|                 |              |                      | Complex with SecB     | 77.2                                                | 63.1  | 50.4  | 3.7                                                             | 3.0   | 2.4   |
|                 |              |                      | Complex with TF (Tig) | 87.3                                                | 73.7  | 56.9  | 5.0                                                             | 4.2   | 3.3   |
| P39357          | YjhF         | Cell inner membrane  | Monomer               | 94.0                                                | 79.5  | 61.4  | 6.0                                                             | 5.1   | 3.9   |
|                 |              |                      | Complex with SecB     | 66.0                                                | 53.9  | 43.1  | 2.4                                                             | 2.0   | 1.6   |
|                 |              |                      | Complex with TF (Tig) | 71.3                                                | 60.3  | 46.5  | 3.0                                                             | 2.5   | 2.0   |
| P39358          | YjhG         |                      | Monomer               | 80.4                                                | 68.0  | 52.5  | 4.1                                                             | 3.5   | 2.7   |
| P39359          | YjhH         |                      | Monomer               | 108.4                                               | 91.6  | 70.7  | 8.5                                                             | 7.2   | 5.5   |
| P39360          | YjhI         |                      | Monomer               | 112.3                                               | 94.9  | 73.3  | 9.2                                                             | 7.8   | 6.0   |
| P39367          | YjhP         | Membrane             | Monomer               | 116.3                                               | 98.2  | 75.9  | 10.0                                                            | 8.4   | 6.5   |
|                 |              |                      | Complex with SecB     | 71.0                                                | 58.0  | 46.3  | 3.0                                                             | 2.4   | 1.9   |
|                 |              |                      | Complex with TF (Tig) | 78.1                                                | 66.0  | 51.0  | 3.8                                                             | 3.2   | 2.5   |
| P39368          | YjhQ         |                      | Monomer               | 131.6                                               | 111.2 | 85.9  | 13.2                                                            | 11.1  | 8.6   |
| P39369          | YjhR         |                      | Monomer               | 102.2                                               | 86.4  | 66.7  | 7.4                                                             | 6.2   | 4.8   |
| P39356          | YjhU         |                      | Monomer               | 104.3                                               | 88.1  | 68.1  | 7.7                                                             | 6.5   | 5.1   |
| Q2EEU2          | YjhX         |                      | Monomer               | 174.4                                               | 147.3 | 113.8 | 23.9                                                            | 20.2  | 15.6  |
| P24203          | YjiA         |                      | Monomer               | 104.8                                               | 88.5  | 68.4  | 7.8                                                             | 6.6   | 5.1   |
| P39374          | YjiC         |                      | Monomer               | 111.3                                               | 94.0  | 72.6  | 9.0                                                             | 7.6   | 5.9   |
| P0AEH8          | YjiG         | Cell inner membrane  | Monomer               | 142.8                                               | 120.7 | 93.2  | 15.7                                                            | 13.3  | 10.3  |
|                 |              |                      | Complex with SecB     | 74.5                                                | 60.8  | 48.6  | 3.4                                                             | 2.7   | 2.2   |
|                 |              |                      | Complex with TF (Tig) | 83.1                                                | 70.2  | 54.3  | 4.5                                                             | 3.8   | 2.9   |
| P39379          | YjiH         | Cell membrane        | Monomer               | 122.8                                               | 103.8 | 80.1  | 11.3                                                            | 9.5   | 7.4   |
|                 |              |                      | Complex with SecB     | 72.0                                                | 58.8  | 47.0  | 3.1                                                             | 2.5   | 2.0   |
|                 |              |                      | Complex with TF (Tig) | 79.6                                                | 67.2  | 51.9  | 4.0                                                             | 3.4   | 2.6   |
| P39381          | YjiJ         | Cell membrane        | Monomer               | 98.9                                                | 83.5  | 64.5  | 6.8                                                             | 5.8   | 4.5   |
|                 |              |                      | Complex with SecB     | 67.3                                                | 55.0  | 43.9  | 2.6                                                             | 2.1   | 1.7   |
|                 |              |                      | Complex with TF (Tig) | 73.0                                                | 61.7  | 47.7  | 3.2                                                             | 2.7   | 2.1   |
| P39382          | YjiK         | Cell membrane        | Monomer               | 109.4                                               | 92.4  | 71.4  | 8.7                                                             | 7.3   | 5.7   |
|                 |              |                      | Complex with SecB     | 69.7                                                | 56.9  | 45.5  | 2.8                                                             | 2.3   | 1.8   |

| UniProtKB A. N. | Protein name | Subcellular location | Subunit               | $D_0 \left( \frac{\mu\text{m}^2}{\text{s}} \right)$ |       |       | $D_{\text{cyto}} \left( \frac{\mu\text{m}^2}{\text{s}} \right)$ |       |       |
|-----------------|--------------|----------------------|-----------------------|-----------------------------------------------------|-------|-------|-----------------------------------------------------------------|-------|-------|
|                 |              |                      |                       | 310 K                                               | 303 K | 293 K | 310 K                                                           | 303 K | 293 K |
|                 |              |                      | Complex with TF (Tig) | 76.3                                                | 64.5  | 49.8  | 3.6                                                             | 3.0   | 2.3   |
| P39383          | YjiL         |                      | Monomer               | 116.4                                               | 98.4  | 76.0  | 10.0                                                            | 8.4   | 6.5   |
|                 |              |                      | Homodimer             | 88.7                                                | 72.5  | 57.9  | 5.2                                                             | 4.3   | 3.4   |
| P39384          | YjiM         |                      | Monomer               | 97.6                                                | 82.5  | 63.7  | 6.6                                                             | 5.6   | 4.3   |
|                 |              |                      | Monomer               | 93.1                                                | 78.6  | 60.7  | 5.9                                                             | 5.0   | 3.8   |
| P39385          | YjiN         | Cell membrane        | Complex with SecB     | 65.7                                                | 53.7  | 42.9  | 2.4                                                             | 2.0   | 1.6   |
|                 |              |                      | Complex with TF (Tig) | 71.0                                                | 59.9  | 46.3  | 3.0                                                             | 2.5   | 1.9   |
| P39387          | YjiP         |                      | Monomer               | 104.5                                               | 88.3  | 68.2  | 7.8                                                             | 6.6   | 5.1   |
| P39389          | YjiR         |                      | Monomer               | 89.7                                                | 75.8  | 58.5  | 5.4                                                             | 4.5   | 3.5   |
| P39390          | YjiS         |                      | Monomer               | 201.7                                               | 170.4 | 131.6 | 32.0                                                            | 27.0  | 20.9  |
| P39391          | YjiT         |                      | Monomer               | 86.3                                                | 72.9  | 56.3  | 4.9                                                             | 4.1   | 3.2   |
| P39393          | YjiV         |                      | Monomer               | 69.0                                                | 58.3  | 45.1  | 2.8                                                             | 2.3   | 1.8   |
| P0ADC8          | YjiX         |                      | Monomer               | 190.8                                               | 161.2 | 124.5 | 28.7                                                            | 24.2  | 18.7  |
|                 |              |                      | Monomer               | 77.4                                                | 65.4  | 50.5  | 3.7                                                             | 3.1   | 2.4   |
| P39396          | YjiY         | Cell inner membrane  | Complex with SecB     | 60.2                                                | 49.2  | 39.3  | 1.9                                                             | 1.5   | 1.2   |
|                 |              |                      | Complex with TF (Tig) | 64.0                                                | 54.1  | 41.8  | 2.2                                                             | 1.9   | 1.5   |
| P18390          | YjjA         |                      | Monomer               | 139.0                                               | 117.4 | 90.7  | 14.8                                                            | 12.5  | 9.7   |
|                 |              |                      | Monomer               | 140.0                                               | 118.2 | 91.3  | 15.1                                                            | 12.7  | 9.8   |
| P0ADD2          | YjjB         | Cell membrane        | Complex with SecB     | 74.2                                                | 60.6  | 48.4  | 3.3                                                             | 2.7   | 2.2   |
|                 |              |                      | Complex with TF (Tig) | 82.7                                                | 69.9  | 54.0  | 4.4                                                             | 3.7   | 2.9   |
|                 |              |                      | Monomer               | 119.9                                               | 101.3 | 78.2  | 10.7                                                            | 9.0   | 7.0   |
| P0A8Y1          | YjjG         | Cytoplasm            | Homodimer             | 91.4                                                | 74.6  | 59.6  | 5.6                                                             | 4.6   | 3.7   |
| P37342          | YjjI         |                      | Monomer               | 86.6                                                | 73.2  | 56.5  | 4.9                                                             | 4.2   | 3.2   |
| P39410          | YjjJ         |                      | Monomer               | 92.0                                                | 77.7  | 60.0  | 5.7                                                             | 4.8   | 3.7   |
| P0A9W3          | YjjK         |                      | Monomer               | 84.1                                                | 71.1  | 54.9  | 4.6                                                             | 3.9   | 3.0   |
|                 |              |                      | Monomer               | 92.2                                                | 77.9  | 60.2  | 5.8                                                             | 4.9   | 3.8   |
| P39398          | YjjL         | Cell inner membrane  | Complex with SecB     | 65.4                                                | 53.5  | 42.7  | 2.4                                                             | 1.9   | 1.6   |
|                 |              |                      | Complex with TF (Tig) | 70.6                                                | 59.7  | 46.1  | 2.9                                                             | 2.5   | 1.9   |
| P39399          | YjjM         |                      | Monomer               | 105.1                                               | 88.8  | 68.6  | 7.9                                                             | 6.7   | 5.1   |
| P39400          | YjjN         |                      | Monomer               | 103.9                                               | 87.8  | 67.8  | 7.7                                                             | 6.5   | 5.0   |
|                 |              |                      | Monomer               | 115.2                                               | 97.3  | 75.2  | 9.8                                                             | 8.2   | 6.4   |
| P0ADD5          | YjjP         | Cell inner membrane  |                       |                                                     |       |       |                                                                 |       |       |

| UniProtKB A. N. | Protein name | Subcellular location | Subunit               | $D_0 \left( \frac{\mu\text{m}^2}{\text{s}} \right)$ |       |       | $D_{\text{cyto}} \left( \frac{\mu\text{m}^2}{\text{s}} \right)$ |       |       |
|-----------------|--------------|----------------------|-----------------------|-----------------------------------------------------|-------|-------|-----------------------------------------------------------------|-------|-------|
|                 |              |                      |                       | 310 K                                               | 303 K | 293 K | 310 K                                                           | 303 K | 293 K |
|                 |              |                      | Complex with SecB     | 70.8                                                | 57.8  | 46.2  | 2.9                                                             | 2.4   | 1.9   |
|                 |              |                      | Complex with TF (Tig) | 77.8                                                | 65.7  | 50.8  | 3.8                                                             | 3.2   | 2.5   |
| P0ADD7          | YjjQ         |                      | Monomer               | 116.8                                               | 98.7  | 76.2  | 10.1                                                            | 8.5   | 6.6   |
|                 |              |                      | Homodimer             | 89.0                                                | 72.7  | 58.1  | 5.3                                                             | 4.3   | 3.4   |
| P39407          | YjjU         |                      | Monomer               | 100.4                                               | 84.8  | 65.5  | 7.1                                                             | 6.0   | 4.6   |
| P39408          | YjjV         |                      | Monomer               | 113.8                                               | 96.1  | 74.3  | 9.5                                                             | 8.0   | 6.2   |
| P39409          | YjjW         |                      | Monomer               | 110.0                                               | 93.0  | 71.8  | 8.8                                                             | 7.4   | 5.7   |
| P39411          | YjjX         |                      | Monomer               | 136.4                                               | 115.2 | 89.0  | 14.2                                                            | 12.0  | 9.3   |
| P0ADD9          | YjjY         |                      | Monomer               | 228.4                                               | 193.0 | 149.1 | 40.7                                                            | 34.4  | 26.6  |
| P55914          | YjjZ         |                      | Monomer               | 182.2                                               | 153.9 | 118.9 | 26.1                                                            | 22.1  | 17.1  |
| P75678          | YkfA         |                      | Monomer               | 109.5                                               | 92.5  | 71.5  | 8.7                                                             | 7.3   | 5.7   |
| P77162          | YkfB         |                      | Monomer               | 140.0                                               | 118.3 | 91.4  | 15.1                                                            | 12.7  | 9.8   |
| Q47688          | YkfC         |                      | Monomer               | 97.2                                                | 82.2  | 63.5  | 6.6                                                             | 5.5   | 4.3   |
| P75677          | YkfF         |                      | Monomer               | 179.7                                               | 151.8 | 117.3 | 25.4                                                            | 21.5  | 16.6  |
| Q47685          | YkfG         |                      | Monomer               | 136.7                                               | 115.5 | 89.2  | 14.3                                                            | 12.1  | 9.3   |
| Q9XB42          | YkfH         |                      | Monomer               | 183.2                                               | 154.8 | 119.5 | 26.4                                                            | 22.3  | 17.2  |
| P77692          | YkfI         |                      | Monomer               | 156.1                                               | 131.9 | 101.9 | 19.0                                                            | 16.1  | 12.4  |
| P75675          | YkfJ         |                      | Monomer               | 173.8                                               | 146.8 | 113.4 | 23.7                                                            | 20.0  | 15.5  |
|                 |              |                      | Monomer               | 136.7                                               | 115.5 | 89.2  | 14.3                                                            | 12.1  | 9.3   |
| A5A605          | YkfM         | Membrane             | Complex with SecB     | 73.8                                                | 60.3  | 48.2  | 3.3                                                             | 2.7   | 2.1   |
|                 |              |                      | Complex with TF (Tig) | 82.2                                                | 69.4  | 53.6  | 4.3                                                             | 3.7   | 2.8   |
| P77601          | YkgA         |                      | Monomer               | 114.5                                               | 96.7  | 74.7  | 9.6                                                             | 8.1   | 6.3   |
|                 |              |                      | Monomer               | 126.9                                               | 107.2 | 82.8  | 12.1                                                            | 10.3  | 7.9   |
| P75685          | YkgB         | Cell inner membrane  | Complex with SecB     | 72.6                                                | 59.3  | 47.4  | 3.1                                                             | 2.6   | 2.0   |
|                 |              |                      | Complex with TF (Tig) | 80.4                                                | 67.9  | 52.5  | 4.1                                                             | 3.5   | 2.7   |
| P77212          | YkgC         |                      | Monomer               | 93.1                                                | 78.6  | 60.7  | 5.9                                                             | 5.0   | 3.8   |
| P77379          | YkgD         |                      | Monomer               | 110.1                                               | 93.0  | 71.8  | 8.8                                                             | 7.4   | 5.7   |
| P77252          | YkgE         |                      | Monomer               | 118.6                                               | 100.2 | 77.4  | 10.4                                                            | 8.8   | 6.8   |
| P77536          | YkgF         |                      | Monomer               | 89.7                                                | 75.8  | 58.5  | 5.4                                                             | 4.5   | 3.5   |
| P77433          | YkgG         |                      | Monomer               | 120.1                                               | 101.4 | 78.3  | 10.7                                                            | 9.1   | 7.0   |
|                 |              |                      | Monomer               | 119.4                                               | 100.8 | 77.9  | 10.6                                                            | 8.9   | 6.9   |
| P77180          | YkgH         | Cell membrane        |                       |                                                     |       |       |                                                                 |       |       |

| UniProtKB A. N. | Protein name | Subcellular location | Subunit               | $D_0 \left( \frac{\mu\text{m}^2}{\text{s}} \right)$ |       |       | $D_{\text{cyto}} \left( \frac{\mu\text{m}^2}{\text{s}} \right)$ |       |       |
|-----------------|--------------|----------------------|-----------------------|-----------------------------------------------------|-------|-------|-----------------------------------------------------------------|-------|-------|
|                 |              |                      |                       | 310 K                                               | 303 K | 293 K | 310 K                                                           | 303 K | 293 K |
|                 |              |                      | Complex with SecB     | 71.5                                                | 58.4  | 46.6  | 3.0                                                             | 2.5   | 2.0   |
|                 |              |                      | Complex with TF (Tig) | 78.8                                                | 66.6  | 51.4  | 3.9                                                             | 3.3   | 2.5   |
| P75687          | YkgI         | Periplasm            | Monomer               | 184.1                                               | 155.5 | 120.1 | 26.7                                                            | 22.5  | 17.4  |
|                 |              |                      | Complex with SecB     | 77.3                                                | 63.1  | 50.4  | 3.7                                                             | 3.0   | 2.4   |
|                 |              |                      | Complex with TF (Tig) | 87.4                                                | 73.8  | 57.0  | 5.0                                                             | 4.3   | 3.3   |
|                 |              |                      |                       |                                                     |       |       |                                                                 |       |       |
| P0AAL9          | YkgJ         |                      | Monomer               | 161.7                                               | 136.6 | 105.5 | 20.5                                                            | 17.3  | 13.3  |
| P56257          | YkgL         |                      | Monomer               | 181.6                                               | 153.5 | 118.5 | 26.0                                                            | 21.9  | 16.9  |
| Q79E92          | YkgN         |                      | Monomer               | 156.3                                               | 132.1 | 102.0 | 19.1                                                            | 16.1  | 12.4  |
| C1P5Z8          | YkgR         | Membrane             | Monomer               | 247.1                                               | 208.8 | 161.2 | 47.2                                                            | 39.9  | 30.8  |
|                 |              |                      | Complex with SecB     | 79.1                                                | 64.6  | 51.6  | 3.9                                                             | 3.2   | 2.6   |
|                 |              |                      | Complex with TF (Tig) | 90.3                                                | 76.3  | 58.9  | 5.5                                                             | 4.6   | 3.6   |
|                 |              |                      |                       |                                                     |       |       |                                                                 |       |       |
| P75704          | YkiA         |                      | Monomer               | 168.5                                               | 142.4 | 110.0 | 22.3                                                            | 18.8  | 14.5  |
| P77473          | YlaB         | Cell inner membrane  | Monomer               | 86.2                                                | 72.8  | 56.2  | 4.9                                                             | 4.1   | 3.2   |
|                 |              |                      | Complex with SecB     | 63.5                                                | 51.9  | 41.5  | 2.2                                                             | 1.8   | 1.4   |
|                 |              |                      | Complex with TF (Tig) | 68.1                                                | 57.6  | 44.5  | 2.7                                                             | 2.2   | 1.7   |
|                 |              |                      |                       |                                                     |       |       |                                                                 |       |       |
| P0AAS0          | YlaC         | Cell inner membrane  | Monomer               | 136.2                                               | 115.1 | 88.9  | 14.2                                                            | 12.0  | 9.3   |
|                 |              |                      | Complex with SecB     | 73.8                                                | 60.3  | 48.1  | 3.3                                                             | 2.7   | 2.1   |
|                 |              |                      | Complex with TF (Tig) | 82.1                                                | 69.4  | 53.6  | 4.3                                                             | 3.6   | 2.8   |
|                 |              |                      |                       |                                                     |       |       |                                                                 |       |       |
| P75713          | YlbA         |                      | Monomer               | 114.1                                               | 96.4  | 74.4  | 9.5                                                             | 8.1   | 6.2   |
| P77129          | YlbE         |                      | Monomer               | 95.7                                                | 80.8  | 62.4  | 6.3                                                             | 5.3   | 4.1   |
| P0AAS5          | YlbF         |                      | Monomer               | 112.7                                               | 95.3  | 73.6  | 9.3                                                             | 7.8   | 6.1   |
| P77688          | YlbG         |                      | Monomer               | 151.6                                               | 128.0 | 98.9  | 17.9                                                            | 15.1  | 11.7  |
| P77759          | YlbH         |                      | Monomer               | 116.9                                               | 98.8  | 76.3  | 10.1                                                            | 8.5   | 6.6   |
| P77087          | YlcE         |                      | Monomer               | 197.4                                               | 166.8 | 128.8 | 30.7                                                            | 25.9  | 20.0  |
| Q47272          | YlcG         |                      | Monomer               | 218.2                                               | 184.3 | 142.4 | 37.3                                                            | 31.5  | 24.3  |
| Q47268          | YlcH         |                      | Monomer               | 256.3                                               | 216.5 | 167.2 | 50.5                                                            | 42.7  | 33.0  |
| A5A607          | YlcI         |                      | Monomer               | 192.9                                               | 163.0 | 125.9 | 29.3                                                            | 24.7  | 19.1  |
| P75800          | YliE         |                      | Monomer               | 72.9                                                | 61.6  | 47.6  | 3.2                                                             | 2.7   | 2.1   |
| P75801          | YliF         | Cell membrane        | Monomer               | 91.9                                                | 77.6  | 60.0  | 5.7                                                             | 4.8   | 3.7   |
|                 |              |                      | Complex with SecB     | 65.3                                                | 53.4  | 42.6  | 2.4                                                             | 1.9   | 1.5   |
|                 |              |                      | Complex with TF (Tig) | 70.5                                                | 59.6  | 46.0  | 2.9                                                             | 2.5   | 1.9   |
|                 |              |                      |                       |                                                     |       |       |                                                                 |       |       |

| UniProtKB A. N. | Protein name | Subcellular location | Subunit               | $D_0 \left( \frac{\mu\text{m}^2}{\text{s}} \right)$ |       |       | $D_{\text{cyto}} \left( \frac{\mu\text{m}^2}{\text{s}} \right)$ |       |       |
|-----------------|--------------|----------------------|-----------------------|-----------------------------------------------------|-------|-------|-----------------------------------------------------------------|-------|-------|
|                 |              |                      |                       | 310 K                                               | 303 K | 293 K | 310 K                                                           | 303 K | 293 K |
| P75804          | YliI         |                      | Monomer               | 99.2                                                | 83.8  | 64.7  | 6.9                                                             | 5.8   | 4.5   |
| P0ACA7          | YliJ         |                      | Monomer               | 123.0                                               | 103.9 | 80.3  | 11.3                                                            | 9.6   | 7.4   |
| P75786          | YliL         |                      | Monomer               | 172.1                                               | 145.4 | 112.3 | 23.3                                                            | 19.7  | 15.2  |
| P0AB10          | YmbA         | Cell membrane        | Monomer               | 129.9                                               | 109.7 | 84.7  | 12.8                                                            | 10.8  | 8.3   |
|                 |              |                      | Complex with SecB     | 73.0                                                | 59.6  | 47.6  | 3.2                                                             | 2.6   | 2.1   |
|                 |              |                      | Complex with TF (Tig) | 81.0                                                | 68.4  | 52.9  | 4.2                                                             | 3.5   | 2.7   |
| P75917          | YmdA         |                      | Monomer               | 165.1                                               | 139.4 | 107.7 | 21.3                                                            | 18.0  | 13.9  |
| P0A8D6          | YmdB         |                      | Monomer               | 134.5                                               | 113.6 | 87.8  | 13.8                                                            | 11.7  | 9.0   |
|                 |              |                      | Homodimer             | 102.5                                               | 83.7  | 66.9  | 7.4                                                             | 6.1   | 4.8   |
| P75919          | YmdC         |                      | Monomer               | 89.3                                                | 75.4  | 58.3  | 5.3                                                             | 4.5   | 3.5   |
| Q7DFV4          | YmdE         |                      | Monomer               | 160.6                                               | 135.7 | 104.8 | 20.2                                                            | 17.0  | 13.2  |
| P56614          | YmdF         |                      | Monomer               | 212.4                                               | 179.4 | 138.6 | 35.4                                                            | 29.9  | 23.1  |
| P75962          | YmfA         | Cell inner membrane  | Monomer               | 138.8                                               | 117.3 | 90.6  | 14.8                                                            | 12.5  | 9.6   |
|                 |              |                      | Complex with SecB     | 74.0                                                | 60.5  | 48.3  | 3.3                                                             | 2.7   | 2.2   |
|                 |              |                      | Complex with TF (Tig) | 82.5                                                | 69.7  | 53.9  | 4.4                                                             | 3.7   | 2.9   |
| P75967          | YmfD         |                      | Monomer               | 120.2                                               | 101.5 | 78.4  | 10.7                                                            | 9.1   | 7.0   |
| P75968          | YmfE         | Cell membrane        | Monomer               | 115.9                                               | 97.9  | 75.6  | 9.9                                                             | 8.4   | 6.5   |
|                 |              |                      | Complex with SecB     | 70.9                                                | 57.9  | 46.3  | 2.9                                                             | 2.4   | 1.9   |
|                 |              |                      | Complex with TF (Tig) | 78.0                                                | 65.9  | 50.9  | 3.8                                                             | 3.2   | 2.5   |
| P75972          | YmfI         |                      | Monomer               | 156.2                                               | 132.0 | 101.9 | 19.0                                                            | 16.1  | 12.4  |
| P75973          | YmfJ         |                      | Monomer               | 163.6                                               | 138.2 | 106.7 | 20.9                                                            | 17.7  | 13.7  |
| P75976          | YmfL         |                      | Monomer               | 130.9                                               | 110.6 | 85.4  | 13.0                                                            | 11.0  | 8.5   |
| P75977          | YmfM         |                      | Monomer               | 159.8                                               | 135.0 | 104.3 | 20.0                                                            | 16.9  | 13.0  |
| P75978          | YmfN         |                      | Monomer               | 91.2                                                | 77.0  | 59.5  | 5.6                                                             | 4.7   | 3.7   |
| P75980          | YmfO         |                      | Monomer               | 138.2                                               | 116.8 | 90.2  | 14.6                                                            | 12.4  | 9.6   |
| P75981          | YmfP         |                      | Monomer               | 114.9                                               | 97.0  | 74.9  | 9.7                                                             | 8.2   | 6.3   |
| P75982          | YmfQ         |                      | Monomer               | 127.5                                               | 107.7 | 83.2  | 12.3                                                            | 10.4  | 8.0   |
|                 |              |                      | Monomer               | 205.7                                               | 173.8 | 134.3 | 33.3                                                            | 28.1  | 21.7  |
| P75979          | YmfR         | Cell membrane        | Complex with SecB     | 78.1                                                | 63.8  | 51.0  | 3.8                                                             | 3.1   | 2.5   |
|                 |              |                      | Complex with TF (Tig) | 88.7                                                | 74.9  | 57.9  | 5.2                                                             | 4.4   | 3.4   |
| P09154          | YmfS         |                      | Monomer               | 145.5                                               | 122.9 | 95.0  | 16.4                                                            | 13.8  | 10.7  |



| UniProtKB A. N. | Protein name | Subcellular location | Subunit               | $D_0 \left( \frac{\mu\text{m}^2}{\text{s}} \right)$ |       |       | $D_{\text{cyto}} \left( \frac{\mu\text{m}^2}{\text{s}} \right)$ |       |       |
|-----------------|--------------|----------------------|-----------------------|-----------------------------------------------------|-------|-------|-----------------------------------------------------------------|-------|-------|
|                 |              |                      |                       | 310 K                                               | 303 K | 293 K | 310 K                                                           | 303 K | 293 K |
| P75992          | YmgA         |                      | Monomer               | 170.2                                               | 143.8 | 111.1 | 22.8                                                            | 19.2  | 14.8  |
| P75994          | YmgC         |                      | Monomer               | 174.6                                               | 147.5 | 113.9 | 24.0                                                            | 20.2  | 15.6  |
| P0AB46          | YmgD         |                      | Monomer               | 161.4                                               | 136.4 | 105.3 | 20.4                                                            | 17.2  | 13.3  |
| P76011          | YmgE         | Cell membrane        | Monomer               | 181.6                                               | 153.4 | 118.5 | 26.0                                                            | 21.9  | 16.9  |
|                 |              |                      | Complex with SecB     | 77.2                                                | 63.0  | 50.4  | 3.7                                                             | 3.0   | 2.4   |
|                 |              |                      | Complex with TF (Tig) | 87.2                                                | 73.7  | 56.9  | 5.0                                                             | 4.2   | 3.3   |
| P58034          | YmgF         |                      | Monomer               | 186.0                                               | 157.1 | 121.4 | 27.2                                                            | 23.0  | 17.8  |
| Q7DFV3          | YmgG         |                      | Monomer               | 167.3                                               | 141.4 | 109.2 | 22.0                                                            | 18.6  | 14.3  |
| A5A611          | YmgI         |                      | Monomer               | 204.0                                               | 172.4 | 133.1 | 32.7                                                            | 27.6  | 21.4  |
| A5A612          | YmgJ         |                      | Monomer               | 194.5                                               | 164.3 | 126.9 | 29.8                                                            | 25.2  | 19.4  |
| P0CB62          | YmiA         | Membrane             | Monomer               | 228.8                                               | 193.3 | 149.3 | 40.8                                                            | 34.5  | 26.6  |
|                 |              |                      | Complex with SecB     | 78.7                                                | 64.3  | 51.4  | 3.9                                                             | 3.2   | 2.5   |
|                 |              |                      | Complex with TF (Tig) | 89.7                                                | 75.8  | 58.5  | 5.4                                                             | 4.5   | 3.5   |
| C1P5Z9          | YmiB         | Membrane             | Monomer               | 244.2                                               | 206.3 | 159.3 | 46.2                                                            | 39.0  | 30.1  |
|                 |              |                      | Complex with SecB     | 79.0                                                | 64.6  | 51.6  | 3.9                                                             | 3.2   | 2.6   |
|                 |              |                      | Complex with TF (Tig) | 90.2                                                | 76.2  | 58.8  | 5.5                                                             | 4.6   | 3.6   |
| P0ACV8          | YmjA         |                      | Monomer               | 177.3                                               | 149.8 | 115.7 | 24.7                                                            | 20.9  | 16.1  |
| Q2EER5          | YmjC         |                      | Monomer               | 201.5                                               | 170.3 | 131.5 | 31.9                                                            | 27.0  | 20.8  |
| P0CD93          | YmjD         |                      | Monomer               | 298.7                                               | 252.3 | 194.9 | 66.7                                                            | 56.4  | 43.6  |
| P77658          | YnaA         |                      | Monomer               | 103.2                                               | 87.2  | 67.4  | 7.6                                                             | 6.4   | 4.9   |
| P76073          | YnaE         |                      | Monomer               | 171.8                                               | 145.1 | 112.1 | 23.2                                                            | 19.6  | 15.1  |
| P0AEB5          | YnaI         | Cell inner membrane  | Monomer               | 101.4                                               | 85.7  | 66.2  | 7.3                                                             | 6.1   | 4.7   |
|                 |              |                      | Complex with SecB     | 67.9                                                | 55.5  | 44.3  | 2.6                                                             | 2.1   | 1.7   |
|                 |              |                      | Complex with TF (Tig) | 73.9                                                | 62.4  | 48.2  | 3.3                                                             | 2.8   | 2.1   |
| P64445          | YnaJ         | Cell membrane        | Monomer               | 177.2                                               | 149.7 | 115.6 | 24.7                                                            | 20.9  | 16.1  |
|                 |              |                      | Complex with SecB     | 76.9                                                | 62.9  | 50.2  | 3.7                                                             | 3.0   | 2.4   |
|                 |              |                      | Complex with TF (Tig) | 86.9                                                | 73.4  | 56.7  | 5.0                                                             | 4.2   | 3.2   |
| P76068          | YnaK         |                      | Monomer               | 174.0                                               | 147.0 | 113.5 | 23.8                                                            | 20.1  | 15.5  |
| P76090          | YnbA         | Cell inner membrane  | Monomer               | 125.5                                               | 106.0 | 81.9  | 11.8                                                            | 10.0  | 7.7   |
|                 |              |                      | Complex with SecB     | 72.4                                                | 59.1  | 47.2  | 3.1                                                             | 2.5   | 2.0   |
|                 |              |                      | Complex with TF (Tig) | 80.1                                                | 67.7  | 52.3  | 4.1                                                             | 3.4   | 2.6   |

| UniProtKB A. N. | Protein name | Subcellular location | Subunit               | $D_0 \left( \frac{\mu\text{m}^2}{\text{s}} \right)$ |       |       | $D_{\text{cyto}} \left( \frac{\mu\text{m}^2}{\text{s}} \right)$ |       |       |
|-----------------|--------------|----------------------|-----------------------|-----------------------------------------------------|-------|-------|-----------------------------------------------------------------|-------|-------|
|                 |              |                      |                       | 310 K                                               | 303 K | 293 K | 310 K                                                           | 303 K | 293 K |
| P76091          | YnbB         | Cell membrane        | Monomer               | 108.0                                               | 91.2  | 70.5  | 8.4                                                             | 7.1   | 5.5   |
|                 |              |                      | Complex with SecB     | 69.4                                                | 56.7  | 45.3  | 2.8                                                             | 2.3   | 1.8   |
|                 |              |                      | Complex with TF (Tig) | 75.9                                                | 64.1  | 49.5  | 3.5                                                             | 3.0   | 2.3   |
| P76092          | YnbC         |                      | Monomer               | 82.6                                                | 69.8  | 53.9  | 4.4                                                             | 3.7   | 2.9   |
| P76093          | YnbD         | Cell membrane        | Monomer               | 92.1                                                | 77.8  | 60.1  | 5.7                                                             | 4.9   | 3.8   |
|                 |              |                      | Complex with SecB     | 65.4                                                | 53.4  | 42.7  | 2.4                                                             | 1.9   | 1.6   |
|                 |              |                      | Complex with TF (Tig) | 70.6                                                | 59.6  | 46.1  | 2.9                                                             | 2.5   | 1.9   |
| P64448          | YnbE         |                      | Monomer               | 200.2                                               | 169.1 | 130.6 | 31.5                                                            | 26.6  | 20.6  |
| C1P600          | YnbG         |                      | Monomer               | 290.0                                               | 245.0 | 189.3 | 63.3                                                            | 53.5  | 41.3  |
| P76112          | YncA         |                      | Monomer               | 133.5                                               | 112.7 | 87.1  | 13.6                                                            | 11.5  | 8.9   |
| P76113          | YncB         |                      | Monomer               | 102.6                                               | 86.7  | 67.0  | 7.5                                                             | 6.3   | 4.9   |
| P76115          | YncD         | Cell outer membrane  | Monomer               | 77.4                                                | 65.4  | 50.5  | 3.7                                                             | 3.1   | 2.4   |
|                 |              |                      | Complex with SecB     | 60.3                                                | 49.2  | 39.3  | 1.9                                                             | 1.5   | 1.2   |
|                 |              |                      | Complex with TF (Tig) | 64.0                                                | 54.1  | 41.8  | 2.2                                                             | 1.9   | 1.5   |
| P76116          | YncE         |                      | Monomer               | 101.6                                               | 85.8  | 66.3  | 7.3                                                             | 6.1   | 4.7   |
| P76117          | YncG         |                      | Monomer               | 123.8                                               | 104.6 | 80.8  | 11.5                                                            | 9.7   | 7.5   |
| P76118          | YncH         |                      | Monomer               | 185.9                                               | 157.0 | 121.3 | 27.2                                                            | 23.0  | 17.7  |
| P76119          | YncI         |                      | Monomer               | 97.7                                                | 82.5  | 63.8  | 6.6                                                             | 5.6   | 4.3   |
| P64459          | YncJ         |                      | Monomer               | 182.1                                               | 153.9 | 118.8 | 26.1                                                            | 22.1  | 17.0  |
| A5A615          | YncL         | Membrane             | Monomer               | 259.3                                               | 219.0 | 169.2 | 51.6                                                            | 43.6  | 33.7  |
|                 |              |                      | Complex with SecB     | 79.3                                                | 64.8  | 51.7  | 3.9                                                             | 3.2   | 2.6   |
|                 |              |                      | Complex with TF (Tig) | 90.6                                                | 76.5  | 59.1  | 5.5                                                             | 4.7   | 3.6   |
| P76146          | YneE         | Cell membrane        | Monomer               | 105.8                                               | 89.4  | 69.0  | 8.0                                                             | 6.8   | 5.2   |
|                 |              |                      | Complex with SecB     | 68.9                                                | 56.3  | 45.0  | 2.7                                                             | 2.2   | 1.8   |
|                 |              |                      | Complex with TF (Tig) | 75.3                                                | 63.6  | 49.1  | 3.5                                                             | 2.9   | 2.3   |
| P76147          | YneF         | Cell membrane        | Monomer               | 106.4                                               | 89.9  | 69.4  | 8.1                                                             | 6.9   | 5.3   |
|                 |              |                      | Complex with SecB     | 69.0                                                | 56.4  | 45.1  | 2.7                                                             | 2.2   | 1.8   |
|                 |              |                      | Complex with TF (Tig) | 75.4                                                | 63.7  | 49.2  | 3.5                                                             | 2.9   | 2.3   |
| P76148          | YneG         |                      | Monomer               | 153.2                                               | 129.4 | 100.0 | 18.3                                                            | 15.4  | 11.9  |
| P77309          | YneJ         |                      | Monomer               | 108.7                                               | 91.8  | 70.9  | 8.5                                                             | 7.2   | 5.6   |
| P76150          | YneK         |                      | Monomer               | 97.5                                                | 82.4  | 63.6  | 6.6                                                             | 5.6   | 4.3   |

| UniProtKB A. N. | Protein name | Subcellular location | Subunit               | $D_0 \left( \frac{\mu\text{m}^2}{\text{s}} \right)$ |       |       | $D_{\text{cyto}} \left( \frac{\mu\text{m}^2}{\text{s}} \right)$ |       |       |
|-----------------|--------------|----------------------|-----------------------|-----------------------------------------------------|-------|-------|-----------------------------------------------------------------|-------|-------|
|                 |              |                      |                       | 310 K                                               | 303 K | 293 K | 310 K                                                           | 303 K | 293 K |
| P76138          | YneL         |                      | Monomer               | 199.8                                               | 168.8 | 130.4 | 31.4                                                            | 26.5  | 20.5  |
| A5A616          | YneM         | Membrane             | Monomer               | 260.1                                               | 219.7 | 169.7 | 51.9                                                            | 43.9  | 33.9  |
|                 |              |                      | Complex with SecB     | 79.3                                                | 64.8  | 51.8  | 4.0                                                             | 3.2   | 2.6   |
|                 |              |                      | Complex with TF (Tig) | 90.6                                                | 76.5  | 59.1  | 5.5                                                             | 4.7   | 3.6   |
| P76169          | YnfA         | Cell inner membrane  | Monomer               | 161.0                                               | 136.0 | 105.1 | 20.3                                                            | 17.1  | 13.2  |
|                 |              |                      | Complex with SecB     | 76.0                                                | 62.1  | 49.6  | 3.5                                                             | 2.9   | 2.3   |
|                 |              |                      | Complex with TF (Tig) | 85.4                                                | 72.2  | 55.7  | 4.8                                                             | 4.0   | 3.1   |
| P76170          | YnfB         |                      | Monomer               | 156.1                                               | 131.9 | 101.9 | 19.0                                                            | 16.1  | 12.4  |
| P67553          | YnfC         | Cell membrane        | Monomer               | 117.7                                               | 99.5  | 76.8  | 10.3                                                            | 8.7   | 6.7   |
|                 |              |                      | Complex with SecB     | 71.2                                                | 58.2  | 46.5  | 3.0                                                             | 2.4   | 1.9   |
|                 |              |                      | Complex with TF (Tig) | 78.4                                                | 66.3  | 51.2  | 3.8                                                             | 3.2   | 2.5   |
| P76172          | YnfD         |                      | Monomer               | 169.4                                               | 143.1 | 110.5 | 22.5                                                            | 19.0  | 14.7  |
| P77374          | YnfE         | Cell membrane        | Monomer               | 73.0                                                | 61.7  | 47.6  | 3.2                                                             | 2.7   | 2.1   |
| P77783          | YnfF         | Cell membrane        | Monomer               | 72.9                                                | 61.6  | 47.6  | 3.2                                                             | 2.7   | 2.1   |
| P0AAJ1          | YnfG         |                      | Monomer               | 125.0                                               | 105.6 | 81.6  | 11.7                                                            | 9.9   | 7.7   |
| P76173          | YnfH         | Cell inner membrane  | Monomer               | 111.4                                               | 94.1  | 72.7  | 9.0                                                             | 7.6   | 5.9   |
|                 |              |                      | Complex with SecB     | 70.1                                                | 57.2  | 45.7  | 2.9                                                             | 2.3   | 1.9   |
|                 |              |                      | Complex with TF (Tig) | 76.8                                                | 64.9  | 50.1  | 3.6                                                             | 3.1   | 2.4   |
| P77559          | YnfL         |                      | Monomer               | 107.7                                               | 91.0  | 70.3  | 8.3                                                             | 7.1   | 5.4   |
| P43531          | YnfM         | Cell inner membrane  | Monomer               | 95.5                                                | 80.6  | 62.3  | 6.3                                                             | 5.3   | 4.1   |
|                 |              |                      | Complex with SecB     | 66.4                                                | 54.2  | 43.3  | 2.5                                                             | 2.0   | 1.6   |
|                 |              |                      | Complex with TF (Tig) | 71.8                                                | 60.7  | 46.9  | 3.1                                                             | 2.6   | 2.0   |
| P76157          | YnfN         |                      | Monomer               | 216.0                                               | 182.4 | 140.9 | 36.5                                                            | 30.9  | 23.8  |
| Q2EES0          | YnfO         |                      | Monomer               | 179.6                                               | 151.7 | 117.2 | 25.4                                                            | 21.4  | 16.6  |
| A5A618          | YnhF         | Membrane             | Monomer               | 276.6                                               | 233.7 | 180.5 | 58.1                                                            | 49.1  | 37.9  |
|                 |              |                      | Complex with SecB     | 79.5                                                | 65.0  | 51.9  | 4.0                                                             | 3.3   | 2.6   |
|                 |              |                      | Complex with TF (Tig) | 91.0                                                | 76.8  | 59.4  | 5.6                                                             | 4.7   | 3.6   |
| P76193          | YnhG         | Periplasm            | Monomer               | 104.3                                               | 88.1  | 68.1  | 7.7                                                             | 6.5   | 5.1   |
|                 |              |                      | Complex with SecB     | 68.6                                                | 56.0  | 44.8  | 2.7                                                             | 2.2   | 1.8   |
|                 |              |                      | Complex with TF (Tig) | 74.8                                                | 63.2  | 48.8  | 3.4                                                             | 2.9   | 2.2   |
| P77739          | YniA         |                      | Monomer               | 108.7                                               | 91.9  | 71.0  | 8.5                                                             | 7.2   | 5.6   |

| UniProtKB A. N. | Protein name | Subcellular location | Subunit               | $D_0 \left( \frac{\mu\text{m}^2}{\text{s}} \right)$ |       |       | $D_{\text{cyto}} \left( \frac{\mu\text{m}^2}{\text{s}} \right)$ |       |       |
|-----------------|--------------|----------------------|-----------------------|-----------------------------------------------------|-------|-------|-----------------------------------------------------------------|-------|-------|
|                 |              |                      |                       | 310 K                                               | 303 K | 293 K | 310 K                                                           | 303 K | 293 K |
| P76208          | YniB         | Cell membrane        | Monomer               | 130.5                                               | 110.3 | 85.2  | 12.9                                                            | 10.9  | 8.4   |
|                 |              |                      | Complex with SecB     | 73.1                                                | 59.7  | 47.7  | 3.2                                                             | 2.6   | 2.1   |
|                 |              |                      | Complex with TF (Tig) | 81.1                                                | 68.5  | 52.9  | 4.2                                                             | 3.5   | 2.7   |
| P77247          | YniC         |                      | Monomer               | 121.7                                               | 102.9 | 79.4  | 11.1                                                            | 9.3   | 7.2   |
| Q2EES1          | YniD         | Membrane             | Monomer               | 244.3                                               | 206.4 | 159.4 | 46.2                                                            | 39.1  | 30.2  |
|                 |              |                      | Complex with SecB     | 79.0                                                | 64.6  | 51.6  | 3.9                                                             | 3.2   | 2.6   |
|                 |              |                      | Complex with TF (Tig) | 90.2                                                | 76.2  | 58.9  | 5.5                                                             | 4.6   | 3.6   |
| P76222          | YnjA         |                      | Monomer               | 130.1                                               | 109.9 | 84.9  | 12.8                                                            | 10.8  | 8.4   |
| P76223          | YnjB         |                      | Monomer               | 97.5                                                | 82.4  | 63.6  | 6.6                                                             | 5.6   | 4.3   |
| P76224          | YnjC         | Cell inner membrane  | Monomer               | 87.7                                                | 74.1  | 57.2  | 5.1                                                             | 4.3   | 3.3   |
|                 |              |                      | Complex with SecB     | 64.0                                                | 52.3  | 41.8  | 2.2                                                             | 1.8   | 1.5   |
|                 |              |                      | Complex with TF (Tig) | 68.8                                                | 58.1  | 44.9  | 2.7                                                             | 2.3   | 1.8   |
| P76909          | YnjD         |                      | Monomer               | 122.4                                               | 103.4 | 79.9  | 11.2                                                            | 9.5   | 7.3   |
| P78067          | YnjE         | Periplasm            | Monomer               | 93.1                                                | 78.7  | 60.8  | 5.9                                                             | 5.0   | 3.8   |
|                 |              |                      | Complex with SecB     | 65.7                                                | 53.7  | 42.9  | 2.4                                                             | 2.0   | 1.6   |
|                 |              |                      | Complex with TF (Tig) | 71.0                                                | 60.0  | 46.3  | 3.0                                                             | 2.5   | 1.9   |
| P76226          | YnjF         | Cell inner membrane  | Monomer               | 125.0                                               | 105.6 | 81.6  | 11.7                                                            | 9.9   | 7.7   |
|                 |              |                      | Complex with SecB     | 72.3                                                | 59.1  | 47.2  | 3.1                                                             | 2.5   | 2.0   |
|                 |              |                      | Complex with TF (Tig) | 80.0                                                | 67.6  | 52.2  | 4.0                                                             | 3.4   | 2.6   |
| P76227          | YnjH         |                      | Monomer               | 172.9                                               | 146.0 | 112.8 | 23.5                                                            | 19.8  | 15.3  |
| P76228          | YnjI         | Cell inner membrane  | Monomer               | 99.9                                                | 84.4  | 65.2  | 7.0                                                             | 5.9   | 4.6   |
|                 |              |                      | Complex with SecB     | 67.5                                                | 55.2  | 44.1  | 2.6                                                             | 2.1   | 1.7   |
|                 |              |                      | Complex with TF (Tig) | 73.4                                                | 62.0  | 47.9  | 3.2                                                             | 2.7   | 2.1   |
| P76257          | YoaA         |                      | Monomer               | 80.3                                                | 67.8  | 52.4  | 4.1                                                             | 3.4   | 2.7   |
| P0AEB7          | YoaB         |                      | Monomer               | 158.1                                               | 133.6 | 103.2 | 19.5                                                            | 16.5  | 12.7  |
| P64490          | YoaC         |                      | Monomer               | 167.2                                               | 141.2 | 109.1 | 21.9                                                            | 18.5  | 14.3  |
| P0AEC0          | YoaE         | Cell inner membrane  | Monomer               | 87.5                                                | 73.9  | 57.1  | 5.1                                                             | 4.3   | 3.3   |
|                 |              |                      | Complex with SecB     | 64.0                                                | 52.3  | 41.7  | 2.2                                                             | 1.8   | 1.5   |
|                 |              |                      | Complex with TF (Tig) | 68.7                                                | 58.0  | 44.8  | 2.7                                                             | 2.3   | 1.8   |
| P64493          | YoaF         |                      | Monomer               | 180.2                                               | 152.3 | 117.6 | 25.6                                                            | 21.6  | 16.7  |
| P64496          | YoaG         |                      | Monomer               | 202.9                                               | 171.4 | 132.4 | 32.4                                                            | 27.4  | 21.1  |

| UniProtKB A. N. | Protein name | Subcellular location | Subunit               | $D_0 \left( \frac{\mu\text{m}^2}{\text{s}} \right)$ |       |       | $D_{\text{cyto}} \left( \frac{\mu\text{m}^2}{\text{s}} \right)$ |       |       |
|-----------------|--------------|----------------------|-----------------------|-----------------------------------------------------|-------|-------|-----------------------------------------------------------------|-------|-------|
|                 |              |                      |                       | 310 K                                               | 303 K | 293 K | 310 K                                                           | 303 K | 293 K |
|                 |              |                      | Homodimer             | 154.7                                               | 126.3 | 100.9 | 18.6                                                            | 15.2  | 12.2  |
| P67338          | YoaH         |                      | Monomer               | 203.6                                               | 172.0 | 132.9 | 32.6                                                            | 27.5  | 21.3  |
| P76239          | YoaI         | Membrane             | Monomer               | 252.8                                               | 213.6 | 165.0 | 49.3                                                            | 41.6  | 32.1  |
|                 |              |                      | Complex with SecB     | 79.2                                                | 64.7  | 51.7  | 3.9                                                             | 3.2   | 2.6   |
|                 |              |                      | Complex with TF (Tig) | 90.4                                                | 76.4  | 59.0  | 5.5                                                             | 4.6   | 3.6   |
| C1P603          | YoaJ         | Membrane             | Monomer               | 288.6                                               | 243.8 | 188.3 | 62.8                                                            | 53.0  | 41.0  |
|                 |              |                      | Complex with SecB     | 79.7                                                | 65.1  | 52.0  | 4.0                                                             | 3.3   | 2.6   |
|                 |              |                      | Complex with TF (Tig) | 91.2                                                | 77.0  | 59.5  | 5.6                                                             | 4.7   | 3.7   |
| C1P602          | YoaK         | Membrane             | Monomer               | 261.6                                               | 221.0 | 170.7 | 52.5                                                            | 44.3  | 34.2  |
|                 |              |                      | Complex with SecB     | 79.3                                                | 64.8  | 51.8  | 4.0                                                             | 3.2   | 2.6   |
|                 |              |                      | Complex with TF (Tig) | 90.6                                                | 76.6  | 59.1  | 5.5                                                             | 4.7   | 3.6   |
| P0AA57          | YobA         | Periplasm            | Monomer               | 153.8                                               | 129.9 | 100.3 | 18.4                                                            | 15.6  | 12.0  |
|                 |              |                      | Complex with SecB     | 75.4                                                | 61.6  | 49.2  | 3.5                                                             | 2.8   | 2.3   |
|                 |              |                      | Complex with TF (Tig) | 84.6                                                | 71.5  | 55.2  | 4.7                                                             | 3.9   | 3.0   |
| P76280          | YobB         |                      | Monomer               | 121.6                                               | 102.7 | 79.4  | 11.0                                                            | 9.3   | 7.2   |
| P67601          | YobD         | Cell inner membrane  | Monomer               | 138.2                                               | 116.7 | 90.2  | 14.6                                                            | 12.4  | 9.6   |
|                 |              |                      | Complex with SecB     | 74.0                                                | 60.4  | 48.3  | 3.3                                                             | 2.7   | 2.2   |
|                 |              |                      | Complex with TF (Tig) | 82.4                                                | 69.6  | 53.8  | 4.4                                                             | 3.7   | 2.8   |
| P64508          | YobF         |                      | Monomer               | 222.7                                               | 188.2 | 145.3 | 38.8                                                            | 32.8  | 25.3  |
| Q2MB16          | YobH         |                      | Monomer               | 183.7                                               | 155.2 | 119.9 | 26.6                                                            | 22.5  | 17.3  |
| C1P604          | YobI         |                      | Monomer               | 289.7                                               | 244.7 | 189.0 | 63.2                                                            | 53.4  | 41.2  |
| P76345          | YodB         | Cell inner membrane  | Monomer               | 130.6                                               | 110.3 | 85.2  | 12.9                                                            | 10.9  | 8.4   |
|                 |              |                      | Complex with SecB     | 73.1                                                | 59.7  | 47.7  | 3.2                                                             | 2.6   | 2.1   |
|                 |              |                      | Complex with TF (Tig) | 81.1                                                | 68.5  | 52.9  | 4.2                                                             | 3.5   | 2.7   |
| P64517          | YodC         |                      | Monomer               | 202.1                                               | 170.7 | 131.9 | 32.1                                                            | 27.1  | 21.0  |
| P64519          | YodD         |                      | Monomer               | 183.2                                               | 154.8 | 119.5 | 26.4                                                            | 22.3  | 17.2  |
| P76356          | YoeA         |                      | Monomer               | 137.1                                               | 115.8 | 89.4  | 14.4                                                            | 12.2  | 9.4   |
| P69348          | YoeB         |                      | Monomer               | 171.1                                               | 144.5 | 111.6 | 23.0                                                            | 19.4  | 15.0  |
| Q2EES3          | YoeF         |                      | Monomer               | 155.8                                               | 131.6 | 101.7 | 18.9                                                            | 16.0  | 12.4  |
| C1P606          | YoeI         |                      | Monomer               | 310.0                                               | 261.9 | 202.3 | 71.3                                                            | 60.2  | 46.5  |
| P0AD17          | YohC         | Cell inner membrane  | Monomer               | 127.4                                               | 107.6 | 83.1  | 12.2                                                            | 10.3  | 8.0   |

| UniProtKB A. N. | Protein name | Subcellular location | Subunit               | $D_0 \left( \frac{\mu\text{m}^2}{\text{s}} \right)$ |       |       | $D_{\text{cyto}} \left( \frac{\mu\text{m}^2}{\text{s}} \right)$ |       |       |
|-----------------|--------------|----------------------|-----------------------|-----------------------------------------------------|-------|-------|-----------------------------------------------------------------|-------|-------|
|                 |              |                      |                       | 310 K                                               | 303 K | 293 K | 310 K                                                           | 303 K | 293 K |
|                 |              |                      | Complex with SecB     | 72.7                                                | 59.4  | 47.4  | 3.1                                                             | 2.6   | 2.1   |
|                 |              |                      | Complex with TF (Tig) | 80.5                                                | 68.0  | 52.5  | 4.1                                                             | 3.5   | 2.7   |
| P33366          | YohD         | Cell inner membrane  | Monomer               | 127.9                                               | 108.1 | 83.5  | 12.4                                                            | 10.4  | 8.1   |
|                 |              |                      | Complex with SecB     | 72.7                                                | 59.4  | 47.5  | 3.2                                                             | 2.6   | 2.1   |
|                 |              |                      | Complex with TF (Tig) | 80.6                                                | 68.1  | 52.6  | 4.1                                                             | 3.5   | 2.7   |
| P33368          | YohF         |                      | Monomer               | 117.0                                               | 98.8  | 76.3  | 10.1                                                            | 8.5   | 6.6   |
|                 |              |                      | Monomer               | 148.8                                               | 125.7 | 97.1  | 17.2                                                            | 14.5  | 11.2  |
| P60632          | YohJ         | Cell inner membrane  | Complex with SecB     | 75.0                                                | 61.3  | 49.0  | 3.4                                                             | 2.8   | 2.2   |
|                 |              |                      | Complex with TF (Tig) | 84.0                                                | 70.9  | 54.8  | 4.6                                                             | 3.9   | 3.0   |
|                 |              |                      | Monomer               | 121.5                                               | 102.6 | 79.3  | 11.0                                                            | 9.3   | 7.2   |
| P0AD19          | YohK         | Cell inner membrane  | Complex with SecB     | 71.8                                                | 58.7  | 46.9  | 3.1                                                             | 2.5   | 2.0   |
|                 |              |                      | Complex with TF (Tig) | 79.3                                                | 67.0  | 51.7  | 3.9                                                             | 3.3   | 2.6   |
|                 |              |                      | Monomer               | 256.3                                               | 216.5 | 167.2 | 50.5                                                            | 42.7  | 33.0  |
| Q2EES6          | YohO         | Cell inner membrane  | Complex with SecB     | 79.2                                                | 64.7  | 51.7  | 3.9                                                             | 3.2   | 2.6   |
|                 |              |                      | Complex with TF (Tig) | 90.5                                                | 76.5  | 59.1  | 5.5                                                             | 4.7   | 3.6   |
|                 |              |                      | Monomer               | 273.3                                               | 230.9 | 178.4 | 56.9                                                            | 48.0  | 37.1  |
| C1P609          | YohP         | Membrane             | Complex with SecB     | 79.5                                                | 64.9  | 51.9  | 4.0                                                             | 3.2   | 2.6   |
|                 |              |                      | Complex with TF (Tig) | 90.9                                                | 76.8  | 59.3  | 5.6                                                             | 4.7   | 3.6   |
|                 |              |                      | Monomer               | 84.6                                                | 71.5  | 55.2  | 4.7                                                             | 3.9   | 3.0   |
| P33941          | YojI         | Cell inner membrane  | Complex with SecB     | 63.0                                                | 51.5  | 41.1  | 2.1                                                             | 1.8   | 1.4   |
|                 |              |                      | Complex with TF (Tig) | 67.5                                                | 57.0  | 44.0  | 2.6                                                             | 2.2   | 1.7   |
| A5A619          | YojO         |                      | Monomer               | 207.8                                               | 175.6 | 135.6 | 33.9                                                            | 28.7  | 22.1  |
|                 |              |                      | Monomer               | 84.0                                                | 71.0  | 54.8  | 4.6                                                             | 3.9   | 3.0   |
| P0AA93          | YpdA         | Cell inner membrane  | Complex with SecB     | 62.8                                                | 51.3  | 41.0  | 2.1                                                             | 1.7   | 1.4   |
|                 |              |                      | Complex with TF (Tig) | 67.2                                                | 56.8  | 43.8  | 2.6                                                             | 2.2   | 1.7   |
| P0AE39          | YpdB         |                      | Monomer               | 114.1                                               | 96.4  | 74.4  | 9.5                                                             | 8.1   | 6.2   |
| P77396          | YpdC         |                      | Monomer               | 108.9                                               | 92.0  | 71.0  | 8.6                                                             | 7.2   | 5.6   |
| P77585          | YpdE         |                      | Monomer               | 102.9                                               | 86.9  | 67.1  | 7.5                                                             | 6.3   | 4.9   |
| P76524          | YpdF         |                      | Monomer               | 100.6                                               | 85.0  | 65.6  | 7.1                                                             | 6.0   | 4.6   |
|                 |              |                      | Monomer               | 171.4                                               | 144.8 | 111.9 | 23.1                                                            | 19.5  | 15.1  |
| O32528          | YpdI         | Cell membrane        | Complex with SecB     | 76.6                                                | 62.6  | 50.0  | 3.6                                                             | 3.0   | 2.4   |

| UniProtKB A. N. | Protein name | Subcellular location | Subunit               | $D_0 \left( \frac{\mu\text{m}^2}{\text{s}} \right)$ |       |       | $D_{\text{cyto}} \left( \frac{\mu\text{m}^2}{\text{s}} \right)$ |       |       |
|-----------------|--------------|----------------------|-----------------------|-----------------------------------------------------|-------|-------|-----------------------------------------------------------------|-------|-------|
|                 |              |                      |                       | 310 K                                               | 303 K | 293 K | 310 K                                                           | 303 K | 293 K |
|                 |              |                      | Complex with TF (Tig) | 86.4                                                | 73.0  | 56.4  | 4.9                                                             | 4.1   | 3.2   |
| Q2EET0          | YpdJ         |                      | Monomer               | 221.0                                               | 186.7 | 144.2 | 38.2                                                            | 32.3  | 24.9  |
| C1P610          | YpdK         | Membrane             | Monomer               | 288.1                                               | 243.4 | 188.0 | 62.5                                                            | 52.8  | 40.8  |
|                 |              |                      | Complex with SecB     | 79.7                                                | 65.1  | 52.0  | 4.0                                                             | 3.3   | 2.6   |
|                 |              |                      | Complex with TF (Tig) | 91.2                                                | 77.0  | 59.5  | 5.6                                                             | 4.7   | 3.7   |
| P76539          | YpeA         |                      | Monomer               | 142.4                                               | 120.3 | 92.9  | 15.6                                                            | 13.2  | 10.2  |
| P0AD40          | YpeB         |                      | Monomer               | 184.6                                               | 155.9 | 120.5 | 26.8                                                            | 22.7  | 17.5  |
| P64542          | YpeC         |                      | Monomer               | 154.4                                               | 130.5 | 100.8 | 18.6                                                            | 15.7  | 12.1  |
| P76559          | YpfG         |                      | Monomer               | 101.4                                               | 85.7  | 66.2  | 7.3                                                             | 6.1   | 4.7   |
| P76561          | YpfH         |                      | Monomer               | 120.7                                               | 102.0 | 78.8  | 10.9                                                            | 9.2   | 7.1   |
| P64429          | YpfJ         | Membrane             | Monomer               | 110.1                                               | 93.0  | 71.8  | 8.8                                                             | 7.4   | 5.7   |
|                 |              |                      | Complex with SecB     | 69.8                                                | 57.0  | 45.5  | 2.8                                                             | 2.3   | 1.8   |
|                 |              |                      | Complex with TF (Tig) | 76.5                                                | 64.6  | 49.9  | 3.6                                                             | 3.0   | 2.3   |
| A5A621          | YpfM         | Cytoplasm            | Monomer               | 301.5                                               | 254.7 | 196.7 | 67.8                                                            | 57.3  | 44.3  |
| Q2EET2          | YpfN         | Cell membrane        | Monomer               | 187.6                                               | 158.5 | 122.4 | 27.7                                                            | 23.4  | 18.1  |
|                 |              |                      | Complex with SecB     | 77.4                                                | 63.3  | 50.5  | 3.7                                                             | 3.0   | 2.4   |
|                 |              |                      | Complex with TF (Tig) | 87.6                                                | 74.0  | 57.2  | 5.1                                                             | 4.3   | 3.3   |
| P0AD47          | YphA         | Cell inner membrane  | Monomer               | 146.4                                               | 123.6 | 95.5  | 16.6                                                            | 14.0  | 10.8  |
|                 |              |                      | Complex with SecB     | 74.8                                                | 61.1  | 48.8  | 3.4                                                             | 2.8   | 2.2   |
|                 |              |                      | Complex with TF (Tig) | 83.6                                                | 70.7  | 54.6  | 4.5                                                             | 3.8   | 3.0   |
| P76584          | YphB         |                      | Monomer               | 108.4                                               | 91.6  | 70.7  | 8.5                                                             | 7.2   | 5.5   |
| P77360          | YphC         |                      | Monomer               | 102.2                                               | 86.3  | 66.7  | 7.4                                                             | 6.2   | 4.8   |
| P77315          | YphD         | Cell inner membrane  | Monomer               | 106.2                                               | 89.7  | 69.3  | 8.1                                                             | 6.8   | 5.3   |
|                 |              |                      | Complex with SecB     | 69.0                                                | 56.4  | 45.0  | 2.7                                                             | 2.2   | 1.8   |
|                 |              |                      | Complex with TF (Tig) | 75.4                                                | 63.7  | 49.2  | 3.5                                                             | 2.9   | 2.3   |
| P77509          | YphE         |                      | Monomer               | 88.4                                                | 74.7  | 57.7  | 5.2                                                             | 4.4   | 3.4   |
| P77269          | YphF         | Periplasm            | Monomer               | 105.5                                               | 89.1  | 68.8  | 8.0                                                             | 6.7   | 5.2   |
|                 |              |                      | Complex with SecB     | 68.8                                                | 56.2  | 44.9  | 2.7                                                             | 2.2   | 1.8   |
|                 |              |                      | Complex with TF (Tig) | 75.2                                                | 63.5  | 49.1  | 3.4                                                             | 2.9   | 2.2   |
| P76585          | YphG         |                      | Monomer               | 64.3                                                | 54.4  | 42.0  | 2.3                                                             | 1.9   | 1.5   |
| P76586          | YphH         |                      | Monomer               | 96.1                                                | 81.2  | 62.7  | 6.4                                                             | 5.4   | 4.2   |

| UniProtKB A. N. | Protein name | Subcellular location | Subunit               | $D_0 \left( \frac{\mu\text{m}^2}{\text{s}} \right)$ |       |       | $D_{\text{cyto}} \left( \frac{\mu\text{m}^2}{\text{s}} \right)$ |       |       |
|-----------------|--------------|----------------------|-----------------------|-----------------------------------------------------|-------|-------|-----------------------------------------------------------------|-------|-------|
|                 |              |                      |                       | 310 K                                               | 303 K | 293 K | 310 K                                                           | 303 K | 293 K |
| P52143          | YpjA         | Cell outer membrane  | Monomer               | 58.5                                                | 49.5  | 38.2  | 1.8                                                             | 1.5   | 1.1   |
|                 |              |                      | Complex with SecB     | 50.8                                                | 41.5  | 33.1  | 1.2                                                             | 0.9   | 0.8   |
|                 |              |                      | Complex with TF (Tig) | 52.7                                                | 44.5  | 34.4  | 1.3                                                             | 1.1   | 0.8   |
| P76612          | YpjB         |                      | Monomer               | 112.5                                               | 95.0  | 73.4  | 9.2                                                             | 7.8   | 6.0   |
| P76613          | YpjC         |                      | Monomer               | 136.9                                               | 115.7 | 89.4  | 14.4                                                            | 12.1  | 9.4   |
| P64432          | YpjD         | Cell inner membrane  | Monomer               | 113.3                                               | 95.7  | 73.9  | 9.4                                                             | 7.9   | 6.1   |
|                 |              |                      | Complex with SecB     | 70.4                                                | 57.5  | 45.9  | 2.9                                                             | 2.4   | 1.9   |
|                 |              |                      | Complex with TF (Tig) | 77.3                                                | 65.3  | 50.5  | 3.7                                                             | 3.1   | 2.4   |
| Q46953          | YpjF         |                      | Monomer               | 159.0                                               | 134.4 | 103.8 | 19.8                                                            | 16.7  | 12.9  |
| P58095          | YpjI         |                      | Monomer               | 172.0                                               | 145.3 | 112.3 | 23.2                                                            | 19.6  | 15.2  |
| P58033          | YpjJ         |                      | Monomer               | 189.6                                               | 160.2 | 123.7 | 28.3                                                            | 23.9  | 18.5  |
| P52134          | YpjK         |                      | Monomer               | 191.1                                               | 161.4 | 124.7 | 28.8                                                            | 24.3  | 18.8  |
| P0ADR0          | YqaA         | Cell inner membrane  | Monomer               | 145.0                                               | 122.5 | 94.6  | 16.2                                                            | 13.7  | 10.6  |
|                 |              |                      | Complex with SecB     | 74.7                                                | 61.0  | 48.7  | 3.4                                                             | 2.8   | 2.2   |
|                 |              |                      | Complex with TF (Tig) | 83.4                                                | 70.5  | 54.5  | 4.5                                                             | 3.8   | 2.9   |
| P77475          | YqaB         |                      | Monomer               | 129.5                                               | 109.4 | 84.5  | 12.7                                                            | 10.7  | 8.3   |
| P0AE42          | YqaE         | Cell membrane        | Monomer               | 212.7                                               | 179.7 | 138.8 | 35.5                                                            | 30.0  | 23.1  |
|                 |              |                      | Complex with SecB     | 78.3                                                | 64.0  | 51.1  | 3.8                                                             | 3.1   | 2.5   |
|                 |              |                      | Complex with TF (Tig) | 89.0                                                | 75.2  | 58.1  | 5.3                                                             | 4.5   | 3.4   |
| P65367          | YqcA         |                      | Monomer               | 142.5                                               | 120.4 | 93.0  | 15.7                                                            | 13.2  | 10.2  |
| Q46919          | YqcC         |                      | Monomer               | 156.7                                               | 132.4 | 102.2 | 19.1                                                            | 16.2  | 12.5  |
| P77031          | YqcE         | Cell inner membrane  | Monomer               | 94.2                                                | 79.6  | 61.5  | 6.1                                                             | 5.1   | 4.0   |
|                 |              |                      | Complex with SecB     | 66.0                                                | 53.9  | 43.1  | 2.4                                                             | 2.0   | 1.6   |
|                 |              |                      | Complex with TF (Tig) | 71.4                                                | 60.3  | 46.6  | 3.0                                                             | 2.5   | 2.0   |
| C1P612          | YqcG         |                      | Monomer               | 219.9                                               | 185.8 | 143.5 | 37.9                                                            | 32.0  | 24.7  |
| Q46807          | YqeA         |                      | Monomer               | 107.9                                               | 91.2  | 70.4  | 8.4                                                             | 7.1   | 5.5   |
| Q46808          | YqeB         |                      | Monomer               | 86.8                                                | 73.3  | 56.6  | 5.0                                                             | 4.2   | 3.2   |
| Q46809          | YqeC         |                      | Monomer               | 115.1                                               | 97.2  | 75.1  | 9.7                                                             | 8.2   | 6.3   |
| Q46939          | YqeF         | Cytoplasm            | Monomer               | 99.2                                                | 83.8  | 64.7  | 6.9                                                             | 5.8   | 4.5   |
| P63340          | YqeG         | Cell inner membrane  | Monomer               | 95.6                                                | 80.8  | 62.4  | 6.3                                                             | 5.3   | 4.1   |
|                 |              |                      | Complex with SecB     | 66.4                                                | 54.3  | 43.3  | 2.5                                                             | 2.0   | 1.6   |



| UniProtKB A. N. | Protein name | Subcellular location | Subunit               | $D_0 \left( \frac{\mu\text{m}^2}{\text{s}} \right)$ |       |       | $D_{\text{cyto}} \left( \frac{\mu\text{m}^2}{\text{s}} \right)$ |       |       |
|-----------------|--------------|----------------------|-----------------------|-----------------------------------------------------|-------|-------|-----------------------------------------------------------------|-------|-------|
|                 |              |                      |                       | 310 K                                               | 303 K | 293 K | 310 K                                                           | 303 K | 293 K |
|                 |              |                      | Complex with TF (Tig) | 71.9                                                | 60.7  | 46.9  | 3.1                                                             | 2.6   | 2.0   |
| Q46941          | YqeH         |                      | Monomer               | 121.8                                               | 102.9 | 79.5  | 11.1                                                            | 9.4   | 7.2   |
| Q46942          | YqeI         |                      | Monomer               | 110.9                                               | 93.7  | 72.4  | 8.9                                                             | 7.6   | 5.8   |
|                 |              |                      | Monomer               | 134.9                                               | 114.0 | 88.0  | 13.9                                                            | 11.7  | 9.1   |
| Q46943          | YqeJ         | Membrane             | Complex with SecB     | 73.6                                                | 60.1  | 48.0  | 3.3                                                             | 2.7   | 2.1   |
|                 |              |                      | Complex with TF (Tig) | 81.9                                                | 69.2  | 53.4  | 4.3                                                             | 3.6   | 2.8   |
| P77136          | YqeK         |                      | Monomer               | 142.5                                               | 120.4 | 93.0  | 15.7                                                            | 13.2  | 10.2  |
| C1P613          | YqeL         |                      | Monomer               | 269.6                                               | 227.7 | 175.9 | 55.4                                                            | 46.8  | 36.2  |
|                 |              |                      | Monomer               | 122.7                                               | 103.7 | 80.1  | 11.3                                                            | 9.5   | 7.3   |
| P67153          | YqfA         | Cell inner membrane  | Complex with SecB     | 72.0                                                | 58.8  | 47.0  | 3.1                                                             | 2.5   | 2.0   |
|                 |              |                      | Complex with TF (Tig) | 79.6                                                | 67.2  | 51.9  | 4.0                                                             | 3.4   | 2.6   |
| P67603          | YqfB         |                      | Monomer               | 161.1                                               | 136.1 | 105.1 | 20.3                                                            | 17.2  | 13.3  |
| P64562          | YqfE         |                      | Monomer               | 185.0                                               | 156.3 | 120.7 | 26.9                                                            | 22.8  | 17.6  |
| C1P614          | YqfG         |                      | Monomer               | 230.2                                               | 194.5 | 150.2 | 41.3                                                            | 34.9  | 27.0  |
|                 |              |                      | Monomer               | 121.2                                               | 102.4 | 79.1  | 10.9                                                            | 9.3   | 7.1   |
| Q46831          | YqgA         | Cell membrane        | Complex with SecB     | 71.8                                                | 58.6  | 46.8  | 3.0                                                             | 2.5   | 2.0   |
|                 |              |                      | Complex with TF (Tig) | 79.2                                                | 66.9  | 51.7  | 3.9                                                             | 3.3   | 2.6   |
| P64567          | YqgB         | Cytoplasm            | Monomer               | 228.9                                               | 193.4 | 149.4 | 40.9                                                            | 34.5  | 26.7  |
| P64570          | YqgC         |                      | Monomer               | 187.2                                               | 158.2 | 122.2 | 27.6                                                            | 23.3  | 18.0  |
| P46879          | YqgD         |                      | Monomer               | 175.9                                               | 148.6 | 114.8 | 24.3                                                            | 20.6  | 15.9  |
| P0A8W5          | YqgE         |                      | Monomer               | 129.7                                               | 109.6 | 84.7  | 12.8                                                            | 10.8  | 8.3   |
| P0A8I1          | YqgF         | Cytoplasm            | Monomer               | 146.5                                               | 123.7 | 95.6  | 16.6                                                            | 14.0  | 10.8  |
|                 |              |                      | Monomer               | 135.1                                               | 114.2 | 88.2  | 13.9                                                            | 11.8  | 9.1   |
| P67244          | YqhA         | Cell membrane        | Complex with SecB     | 73.6                                                | 60.2  | 48.1  | 3.3                                                             | 2.7   | 2.1   |
|                 |              |                      | Complex with TF (Tig) | 81.9                                                | 69.2  | 53.5  | 4.3                                                             | 3.6   | 2.8   |
| Q46855          | YqhC         |                      | Monomer               | 104.5                                               | 88.3  | 68.2  | 7.8                                                             | 6.6   | 5.1   |
|                 |              |                      | Monomer               | 98.2                                                | 83.0  | 64.1  | 6.7                                                             | 5.7   | 4.4   |
| Q46856          | YqhD         |                      | Homodimer             | 74.8                                                | 61.1  | 48.8  | 3.4                                                             | 2.8   | 2.2   |
| Q46858          | YqhG         |                      | Monomer               | 105.6                                               | 89.2  | 68.9  | 8.0                                                             | 6.7   | 5.2   |
|                 |              |                      | Monomer               | 175.9                                               | 148.6 | 114.8 | 24.3                                                            | 20.6  | 15.9  |
| P65298          | YqhH         | Cell outer membrane  | Complex with SecB     | 76.9                                                | 62.8  | 50.2  | 3.6                                                             | 3.0   | 2.4   |

| UniProtKB A. N. | Protein name | Subcellular location | Subunit               | $D_0 \left( \frac{\mu\text{m}^2}{\text{s}} \right)$ |       |       | $D_{\text{cyto}} \left( \frac{\mu\text{m}^2}{\text{s}} \right)$ |       |       |
|-----------------|--------------|----------------------|-----------------------|-----------------------------------------------------|-------|-------|-----------------------------------------------------------------|-------|-------|
|                 |              |                      |                       | 310 K                                               | 303 K | 293 K | 310 K                                                           | 303 K | 293 K |
|                 |              |                      | Complex with TF (Tig) | 86.8                                                | 73.3  | 56.6  | 5.0                                                             | 4.2   | 3.2   |
| P0A8Z7          | YqiA         |                      | Monomer               | 127.5                                               | 107.7 | 83.2  | 12.3                                                            | 10.4  | 8.0   |
| P0ADU7          | YqiB         |                      | Monomer               | 141.6                                               | 119.6 | 92.4  | 15.4                                                            | 13.0  | 10.1  |
| Q46868          | YqiC         |                      | Monomer               | 164.6                                               | 139.0 | 107.4 | 21.2                                                            | 17.9  | 13.8  |
| P76655          | YqiG         | Cell outer membrane  | Monomer               | 72.3                                                | 61.1  | 47.2  | 3.1                                                             | 2.6   | 2.0   |
|                 |              |                      | Complex with SecB     | 58.1                                                | 47.4  | 37.9  | 1.7                                                             | 1.4   | 1.1   |
|                 |              |                      | Complex with TF (Tig) | 61.3                                                | 51.8  | 40.0  | 2.0                                                             | 1.7   | 1.3   |
| P77616          | YqiH         | Periplasm            | Monomer               | 114.4                                               | 96.7  | 74.7  | 9.6                                                             | 8.1   | 6.3   |
|                 |              |                      | Complex with SecB     | 70.6                                                | 57.7  | 46.1  | 2.9                                                             | 2.4   | 1.9   |
|                 |              |                      | Complex with TF (Tig) | 77.6                                                | 65.6  | 50.7  | 3.7                                                             | 3.2   | 2.4   |
| P76656          | YqiI         |                      | Monomer               | 101.6                                               | 85.9  | 66.3  | 7.3                                                             | 6.2   | 4.8   |
| P76657          | YqiJ         | Cell inner membrane  | Monomer               | 124.3                                               | 105.0 | 81.1  | 11.6                                                            | 9.8   | 7.6   |
|                 |              |                      | Complex with SecB     | 72.2                                                | 59.0  | 47.1  | 3.1                                                             | 2.5   | 2.0   |
|                 |              |                      | Complex with TF (Tig) | 79.9                                                | 67.5  | 52.1  | 4.0                                                             | 3.4   | 2.6   |
| P77306          | YqiK         | Cell inner membrane  | Monomer               | 85.1                                                | 71.9  | 55.5  | 4.7                                                             | 4.0   | 3.1   |
|                 |              |                      | Complex with SecB     | 63.2                                                | 51.6  | 41.2  | 2.2                                                             | 1.8   | 1.4   |
|                 |              |                      | Complex with TF (Tig) | 67.7                                                | 57.2  | 44.2  | 2.6                                                             | 2.2   | 1.7   |
| P0AA63          | YqjA         | Cell inner membrane  | Monomer               | 121.3                                               | 102.4 | 79.1  | 11.0                                                            | 9.3   | 7.2   |
|                 |              |                      | Complex with SecB     | 71.8                                                | 58.6  | 46.8  | 3.0                                                             | 2.5   | 2.0   |
|                 |              |                      | Complex with TF (Tig) | 79.2                                                | 66.9  | 51.7  | 3.9                                                             | 3.3   | 2.6   |
| P42615          | YqjB         | Membrane             | Monomer               | 150.5                                               | 127.1 | 98.2  | 17.6                                                            | 14.9  | 11.5  |
|                 |              |                      | Complex with SecB     | 75.2                                                | 61.4  | 49.0  | 3.4                                                             | 2.8   | 2.2   |
|                 |              |                      | Complex with TF (Tig) | 84.2                                                | 71.1  | 54.9  | 4.6                                                             | 3.9   | 3.0   |
| P42616          | YqjC         |                      | Monomer               | 151.6                                               | 128.1 | 98.9  | 17.9                                                            | 15.1  | 11.7  |
| P64581          | YqjD         |                      | Monomer               | 165.9                                               | 140.1 | 108.3 | 21.6                                                            | 18.2  | 14.1  |
| P64585          | YqjE         | Cell inner membrane  | Monomer               | 146.6                                               | 123.9 | 95.7  | 16.6                                                            | 14.1  | 10.9  |
|                 |              |                      | Complex with SecB     | 74.8                                                | 61.1  | 48.8  | 3.4                                                             | 2.8   | 2.2   |
|                 |              |                      | Complex with TF (Tig) | 83.7                                                | 70.7  | 54.6  | 4.5                                                             | 3.8   | 3.0   |
| P42619          | YqjF         | Cell inner membrane  | Monomer               | 150.8                                               | 127.4 | 98.4  | 17.7                                                            | 14.9  | 11.5  |
|                 |              |                      | Complex with SecB     | 75.2                                                | 61.4  | 49.1  | 3.4                                                             | 2.8   | 2.2   |
|                 |              |                      | Complex with TF (Tig) | 84.2                                                | 71.1  | 55.0  | 4.6                                                             | 3.9   | 3.0   |

| UniProtKB A. N. | Protein name | Subcellular location | Subunit               | $D_0 \left( \frac{\mu\text{m}^2}{\text{s}} \right)$ |       |       | $D_{\text{cyto}} \left( \frac{\mu\text{m}^2}{\text{s}} \right)$ |       |       |
|-----------------|--------------|----------------------|-----------------------|-----------------------------------------------------|-------|-------|-----------------------------------------------------------------|-------|-------|
|                 |              |                      |                       | 310 K                                               | 303 K | 293 K | 310 K                                                           | 303 K | 293 K |
| P42620          | YqjG         |                      | Monomer               | 102.9                                               | 86.9  | 67.1  | 7.5                                                             | 6.3   | 4.9   |
| Q46871          | YqjH         | Cytoplasm            | Monomer               | 113.8                                               | 96.2  | 74.3  | 9.5                                                             | 8.0   | 6.2   |
| P64588          | YqjI         |                      | Monomer               | 123.6                                               | 104.4 | 80.7  | 11.4                                                            | 9.7   | 7.5   |
| Q47710          | YqjK         |                      | Monomer               | 161.6                                               | 136.5 | 105.5 | 20.4                                                            | 17.3  | 13.3  |
| P42913          | YraH         | Fimbrium             | Monomer               | 129.6                                               | 109.5 | 84.6  | 12.7                                                            | 10.7  | 8.3   |
|                 |              |                      | Complex with SecB     | 73.0                                                | 59.6  | 47.6  | 3.2                                                             | 2.6   | 2.1   |
|                 |              |                      | Complex with TF (Tig) | 80.9                                                | 68.4  | 52.8  | 4.2                                                             | 3.5   | 2.7   |
| P42914          | YraI         | Periplasm            | Monomer               | 119.2                                               | 100.7 | 77.8  | 10.5                                                            | 8.9   | 6.9   |
|                 |              |                      | Complex with SecB     | 71.4                                                | 58.4  | 46.6  | 3.0                                                             | 2.5   | 2.0   |
|                 |              |                      | Complex with TF (Tig) | 78.8                                                | 66.6  | 51.4  | 3.9                                                             | 3.3   | 2.5   |
| P42915          | YraJ         | Cell outer membrane  | Monomer               | 71.8                                                | 60.6  | 46.8  | 3.1                                                             | 2.6   | 2.0   |
|                 |              |                      | Complex with SecB     | 57.8                                                | 47.2  | 37.7  | 1.7                                                             | 1.4   | 1.1   |
|                 |              |                      | Complex with TF (Tig) | 61.0                                                | 51.5  | 39.8  | 2.0                                                             | 1.7   | 1.3   |
| P43319          | YraK         | Fimbrium             | Monomer               | 101.7                                               | 85.9  | 66.3  | 7.3                                                             | 6.2   | 4.8   |
|                 |              |                      | Complex with SecB     | 68.0                                                | 55.5  | 44.4  | 2.6                                                             | 2.2   | 1.7   |
|                 |              |                      | Complex with TF (Tig) | 74.0                                                | 62.5  | 48.3  | 3.3                                                             | 2.8   | 2.2   |
| P45465          | YraN         |                      | Monomer               | 147.9                                               | 125.0 | 96.5  | 17.0                                                            | 14.3  | 11.1  |
| P64596          | YraP         | Periplasm            | Monomer               | 131.4                                               | 111.0 | 85.7  | 13.1                                                            | 11.1  | 8.6   |
|                 |              |                      | Complex with SecB     | 73.2                                                | 59.8  | 47.8  | 3.2                                                             | 2.6   | 2.1   |
|                 |              |                      | Complex with TF (Tig) | 81.3                                                | 68.7  | 53.0  | 4.2                                                             | 3.6   | 2.7   |
| P45468          | YraQ         | Cell membrane        | Monomer               | 103.0                                               | 87.0  | 67.2  | 7.5                                                             | 6.4   | 4.9   |
|                 |              |                      | Complex with SecB     | 68.3                                                | 55.8  | 44.6  | 2.7                                                             | 2.2   | 1.7   |
|                 |              |                      | Complex with TF (Tig) | 74.4                                                | 62.9  | 48.6  | 3.4                                                             | 2.8   | 2.2   |
| P45469          | YraR         |                      | Monomer               | 124.0                                               | 104.8 | 80.9  | 11.5                                                            | 9.7   | 7.5   |
| P0A9W6          | YrbA         |                      | Monomer               | 176.4                                               | 149.0 | 115.1 | 24.5                                                            | 20.7  | 16.0  |
| P45394          | YrbG         | Cell inner membrane  | Monomer               | 105.9                                               | 89.5  | 69.1  | 8.0                                                             | 6.8   | 5.2   |
|                 |              |                      | Complex with SecB     | 68.9                                                | 56.3  | 45.0  | 2.7                                                             | 2.2   | 1.8   |
|                 |              |                      | Complex with TF (Tig) | 75.3                                                | 63.6  | 49.1  | 3.5                                                             | 2.9   | 2.3   |
| P64610          | YrbL         |                      | Monomer               | 121.7                                               | 102.8 | 79.4  | 11.1                                                            | 9.3   | 7.2   |
| C1P618          | YrbN         |                      | Monomer               | 277.3                                               | 234.3 | 181.0 | 58.4                                                            | 49.3  | 38.1  |
| P0A9W9          | YrdA         |                      | Monomer               | 130.8                                               | 110.5 | 85.4  | 13.0                                                            | 11.0  | 8.5   |

| UniProtKB A. N. | Protein name | Subcellular location | Subunit               | $D_0 \left( \frac{\mu\text{m}^2}{\text{s}} \right)$ |       |       | $D_{\text{cyto}} \left( \frac{\mu\text{m}^2}{\text{s}} \right)$ |       |       |
|-----------------|--------------|----------------------|-----------------------|-----------------------------------------------------|-------|-------|-----------------------------------------------------------------|-------|-------|
|                 |              |                      |                       | 310 K                                               | 303 K | 293 K | 310 K                                                           | 303 K | 293 K |
| P45795          | YrdB         |                      | Monomer               | 172.5                                               | 145.7 | 112.5 | 23.4                                                            | 19.7  | 15.3  |
| P45771          | YrdD         |                      | Monomer               | 131.8                                               | 111.4 | 86.0  | 13.2                                                            | 11.2  | 8.6   |
| P45800          | YrfF         | Cell inner membrane  | Monomer               | 76.5                                                | 64.7  | 49.9  | 3.6                                                             | 3.0   | 2.4   |
|                 |              |                      | Complex with SecB     | 59.9                                                | 48.9  | 39.1  | 1.9                                                             | 1.5   | 1.2   |
|                 |              |                      | Complex with TF (Tig) | 63.6                                                | 53.7  | 41.5  | 2.2                                                             | 1.9   | 1.4   |
| P64636          | YrfG         |                      | Monomer               | 119.7                                               | 101.1 | 78.1  | 10.6                                                            | 9.0   | 6.9   |
| P46856          | YrhA         |                      | Monomer               | 143.7                                               | 121.4 | 93.7  | 15.9                                                            | 13.5  | 10.4  |
| P46857          | YrhB         |                      | Monomer               | 168.5                                               | 142.4 | 110.0 | 22.3                                                            | 18.8  | 14.5  |
| P58037          | YrhD         |                      | Monomer               | 210.4                                               | 177.7 | 137.3 | 34.7                                                            | 29.4  | 22.7  |
| P56256          | YsaA         |                      | Monomer               | 138.7                                               | 117.1 | 90.5  | 14.8                                                            | 12.5  | 9.6   |
| Q2M7M3          | YsaB         | Cell membrane        | Monomer               | 164.2                                               | 138.8 | 107.2 | 21.1                                                            | 17.9  | 13.8  |
|                 |              |                      | Complex with SecB     | 76.2                                                | 62.2  | 49.7  | 3.6                                                             | 2.9   | 2.3   |
|                 |              |                      | Complex with TF (Tig) | 85.7                                                | 72.4  | 55.9  | 4.8                                                             | 4.1   | 3.1   |
| P56262          | YsgA         |                      | Monomer               | 113.0                                               | 95.5  | 73.7  | 9.3                                                             | 7.9   | 6.1   |
| C1P620          | YshB         |                      | Monomer               | 257.0                                               | 217.1 | 167.7 | 50.8                                                            | 42.9  | 33.1  |
| A5A630          | YtcA         | Cell membrane        | Monomer               | 170.8                                               | 144.3 | 111.5 | 22.9                                                            | 19.4  | 15.0  |
|                 |              |                      | Complex with SecB     | 76.6                                                | 62.6  | 50.0  | 3.6                                                             | 3.0   | 2.4   |
|                 |              |                      | Complex with TF (Tig) | 86.3                                                | 72.9  | 56.3  | 4.9                                                             | 4.1   | 3.2   |
| P39309          | YtfA         |                      | Monomer               | 159.3                                               | 134.6 | 104.0 | 19.8                                                            | 16.8  | 12.9  |
| P39310          | YtfB         | Membrane             | Monomer               | 123.4                                               | 104.3 | 80.5  | 11.4                                                            | 9.6   | 7.4   |
|                 |              |                      | Complex with SecB     | 72.1                                                | 58.9  | 47.0  | 3.1                                                             | 2.5   | 2.0   |
|                 |              |                      | Complex with TF (Tig) | 79.7                                                | 67.3  | 52.0  | 4.0                                                             | 3.4   | 2.6   |
| P69506          | YtfE         | Cytoplasm            | Monomer               | 120.7                                               | 102.0 | 78.8  | 10.8                                                            | 9.2   | 7.1   |
|                 |              |                      | Homodimer             | 92.0                                                | 75.1  | 60.0  | 5.7                                                             | 4.7   | 3.7   |
| P39314          | YtfF         | Cell inner membrane  | Monomer               | 105.3                                               | 89.0  | 68.7  | 7.9                                                             | 6.7   | 5.2   |
|                 |              |                      | Complex with SecB     | 68.8                                                | 56.2  | 44.9  | 2.7                                                             | 2.2   | 1.8   |
|                 |              |                      | Complex with TF (Tig) | 75.1                                                | 63.5  | 49.0  | 3.4                                                             | 2.9   | 2.2   |
| P0ACN2          | YtfH         |                      | Monomer               | 150.9                                               | 127.5 | 98.5  | 17.7                                                            | 14.9  | 11.5  |
| P39317          | YtfI         |                      | Monomer               | 104.5                                               | 88.3  | 68.2  | 7.8                                                             | 6.6   | 5.1   |
| P39187          | YtfJ         | Periplasm            | Monomer               | 130.4                                               | 110.2 | 85.1  | 12.9                                                            | 10.9  | 8.4   |
|                 |              |                      | Complex with SecB     | 73.1                                                | 59.7  | 47.7  | 3.2                                                             | 2.6   | 2.1   |

| UniProtKB A. N. | Protein name | Subcellular location   | Subunit               | $D_0 \left( \frac{\mu\text{m}^2}{\text{s}} \right)$ |       |       | $D_{\text{cyto}} \left( \frac{\mu\text{m}^2}{\text{s}} \right)$ |       |       |
|-----------------|--------------|------------------------|-----------------------|-----------------------------------------------------|-------|-------|-----------------------------------------------------------------|-------|-------|
|                 |              |                        |                       | 310 K                                               | 303 K | 293 K | 310 K                                                           | 303 K | 293 K |
|                 |              |                        | Complex with TF (Tig) | 81.1                                                | 68.5  | 52.9  | 4.2                                                             | 3.5   | 2.7   |
| P0ADE2          | YtfK         |                        | Monomer               | 187.6                                               | 158.5 | 122.4 | 27.7                                                            | 23.4  | 18.1  |
|                 |              |                        | Monomer               | 92.0                                                | 77.7  | 60.0  | 5.7                                                             | 4.8   | 3.7   |
| P0AE45          | YtfL         | Cell inner membrane    | Complex with SecB     | 65.4                                                | 53.4  | 42.7  | 2.4                                                             | 1.9   | 1.5   |
|                 |              |                        | Complex with TF (Tig) | 70.5                                                | 59.6  | 46.0  | 2.9                                                             | 2.5   | 1.9   |
| P0ADE4          | YtfM         |                        | Monomer               | 82.9                                                | 70.1  | 54.1  | 4.4                                                             | 3.7   | 2.9   |
| P39321          | YtfN         |                        | Monomer               | 61.9                                                | 52.3  | 40.4  | 2.0                                                             | 1.7   | 1.3   |
| P0AE48          | YtfP         |                        | Monomer               | 156.3                                               | 132.0 | 102.0 | 19.1                                                            | 16.1  | 12.4  |
|                 |              |                        | Monomer               | 106.4                                               | 89.9  | 69.4  | 8.1                                                             | 6.9   | 5.3   |
| P39325          | YtfQ         | Periplasm              | Complex with SecB     | 69.0                                                | 56.4  | 45.0  | 2.7                                                             | 2.2   | 1.8   |
|                 |              |                        | Complex with TF (Tig) | 75.4                                                | 63.7  | 49.2  | 3.5                                                             | 2.9   | 2.3   |
| Q6BEX0          | YtfR         |                        | Monomer               | 88.3                                                | 74.6  | 57.6  | 5.2                                                             | 4.4   | 3.4   |
|                 |              |                        | Monomer               | 104.8                                               | 88.5  | 68.4  | 7.8                                                             | 6.6   | 5.1   |
| P39328          | YtfT         | Cell inner membrane    | Complex with SecB     | 68.7                                                | 56.1  | 44.8  | 2.7                                                             | 2.2   | 1.8   |
|                 |              |                        | Complex with TF (Tig) | 75.0                                                | 63.3  | 48.9  | 3.4                                                             | 2.9   | 2.2   |
|                 |              |                        | Monomer               | 230.4                                               | 194.7 | 150.4 | 41.4                                                            | 35.0  | 27.0  |
| A8DYQ1          | YthA         | Cell membrane          | Complex with SecB     | 78.8                                                | 64.3  | 51.4  | 3.9                                                             | 3.2   | 2.5   |
|                 |              |                        | Complex with TF (Tig) | 89.7                                                | 75.8  | 58.6  | 5.4                                                             | 4.6   | 3.5   |
|                 |              |                        | Monomer               | 217.5                                               | 183.8 | 141.9 | 37.1                                                            | 31.3  | 24.2  |
| Q2M5U1          | YtjA         | Cell membrane          | Complex with SecB     | 78.5                                                | 64.1  | 51.2  | 3.8                                                             | 3.1   | 2.5   |
|                 |              |                        | Complex with TF (Tig) | 89.2                                                | 75.4  | 58.2  | 5.3                                                             | 4.5   | 3.5   |
| P76692          | YzgL         |                        | Monomer               | 171.7                                               | 145.0 | 112.0 | 23.1                                                            | 19.6  | 15.1  |
| P0ADS2          | ZapA         | Cytoplasm              | Monomer               | 157.6                                               | 133.1 | 102.8 | 19.4                                                            | 16.4  | 12.7  |
|                 |              |                        | Homodimer             | 120.1                                               | 98.1  | 78.4  | 10.7                                                            | 8.8   | 7.0   |
| P0AF36          | ZapB         | Cytoplasm              | Monomer               | 175.1                                               | 147.9 | 114.2 | 24.1                                                            | 20.4  | 15.7  |
|                 |              |                        | Homodimer             | 133.4                                               | 109.0 | 87.1  | 13.6                                                            | 11.1  | 8.8   |
| P76344          | ZinT         | Cytoplasm<br>Periplasm | Monomer               | 120.9                                               | 102.1 | 78.9  | 10.9                                                            | 9.2   | 7.1   |
|                 |              |                        | Monomer               | 103.9                                               | 87.8  | 67.8  | 7.7                                                             | 6.5   | 5.0   |
| P77173          | ZipA         | Cell inner membrane    | Complex with SecB     | 68.5                                                | 55.9  | 44.7  | 2.7                                                             | 2.2   | 1.8   |
|                 |              |                        | Complex with TF (Tig) | 74.7                                                | 63.1  | 48.7  | 3.4                                                             | 2.9   | 2.2   |

| UniProtKB A. N. | Protein name | Subcellular location | Subunit               | $D_0 \left( \frac{\mu\text{m}^2}{\text{s}} \right)$ |       |       | $D_{\text{cyto}} \left( \frac{\mu\text{m}^2}{\text{s}} \right)$ |       |       |
|-----------------|--------------|----------------------|-----------------------|-----------------------------------------------------|-------|-------|-----------------------------------------------------------------|-------|-------|
|                 |              |                      |                       | 310 K                                               | 303 K | 293 K | 310 K                                                           | 303 K | 293 K |
| P75757          | ZitB         | Cell inner membrane  | Monomer               | 106.0                                               | 89.5  | 69.1  | 8.0                                                             | 6.8   | 5.2   |
|                 |              |                      | Complex with SecB     | 68.9                                                | 56.3  | 45.0  | 2.7                                                             | 2.2   | 1.8   |
|                 |              |                      | Complex with TF (Tig) | 75.3                                                | 63.6  | 49.1  | 3.5                                                             | 2.9   | 2.3   |
| P37617          | ZntA         | Cell inner membrane  | Monomer               | 77.6                                                | 65.5  | 50.6  | 3.7                                                             | 3.2   | 2.4   |
|                 |              |                      | Complex with SecB     | 60.3                                                | 49.3  | 39.4  | 1.9                                                             | 1.6   | 1.2   |
|                 |              |                      | Complex with TF (Tig) | 64.1                                                | 54.1  | 41.8  | 2.2                                                             | 1.9   | 1.5   |
| P64423          | ZntB         | Cell inner membrane  | Monomer               | 103.7                                               | 87.6  | 67.7  | 7.6                                                             | 6.5   | 5.0   |
|                 |              |                      | Complex with SecB     | 68.4                                                | 55.9  | 44.7  | 2.7                                                             | 2.2   | 1.8   |
|                 |              |                      | Complex with TF (Tig) | 74.6                                                | 63.0  | 48.7  | 3.4                                                             | 2.9   | 2.2   |
| P0ACS5          | ZntR         |                      | Monomer               | 142.9                                               | 120.7 | 93.2  | 15.7                                                            | 13.3  | 10.3  |
|                 |              |                      | Homodimer             | 108.9                                               | 88.9  | 71.0  | 8.6                                                             | 7.0   | 5.6   |
| P39172          | ZnuA         | Periplasm            | Monomer               | 107.1                                               | 90.4  | 69.9  | 8.2                                                             | 7.0   | 5.4   |
|                 |              |                      | Complex with SecB     | 69.2                                                | 56.5  | 45.1  | 2.8                                                             | 2.3   | 1.8   |
|                 |              |                      | Complex with TF (Tig) | 75.6                                                | 63.9  | 49.4  | 3.5                                                             | 3.0   | 2.3   |
| P39832          | ZnuB         | Cell inner membrane  | Monomer               | 115.7                                               | 97.7  | 75.5  | 9.8                                                             | 8.3   | 6.4   |
|                 |              |                      | Complex with SecB     | 70.8                                                | 57.9  | 46.2  | 2.9                                                             | 2.4   | 1.9   |
|                 |              |                      | Complex with TF (Tig) | 77.9                                                | 65.8  | 50.9  | 3.8                                                             | 3.2   | 2.5   |
| P0A9X1          | ZnuC         | Cell inner membrane  | Monomer               | 115.4                                               | 97.5  | 75.3  | 9.8                                                             | 8.3   | 6.4   |
|                 |              |                      | Complex with SecB     | 70.8                                                | 57.8  | 46.2  | 2.9                                                             | 2.4   | 1.9   |
|                 |              |                      | Complex with TF (Tig) | 77.9                                                | 65.8  | 50.8  | 3.8                                                             | 3.2   | 2.5   |
| P0AAA9          | ZraP         | Periplasm            | Monomer               | 146.4                                               | 123.7 | 95.5  | 16.6                                                            | 14.0  | 10.8  |
|                 |              |                      | Complex with SecB     | 74.8                                                | 61.1  | 48.8  | 3.4                                                             | 2.8   | 2.2   |
|                 |              |                      | Complex with TF (Tig) | 83.6                                                | 70.7  | 54.6  | 4.5                                                             | 3.8   | 3.0   |
| P14375          | ZraR         | Cytoplasm            | Monomer               | 93.0                                                | 78.6  | 60.7  | 5.9                                                             | 5.0   | 3.8   |
| P14377          | ZraS         | Cell inner membrane  | Monomer               | 91.1                                                | 76.9  | 59.4  | 5.6                                                             | 4.7   | 3.6   |
|                 |              |                      | Complex with SecB     | 65.1                                                | 53.2  | 42.5  | 2.3                                                             | 1.9   | 1.5   |
|                 |              |                      | Complex with TF (Tig) | 70.2                                                | 59.3  | 45.8  | 2.9                                                             | 2.4   | 1.9   |
| P0A8H3          | ZupT         | Cell membrane        | Monomer               | 117.8                                               | 99.5  | 76.8  | 10.3                                                            | 8.7   | 6.7   |
|                 |              |                      | Complex with SecB     | 71.2                                                | 58.2  | 46.5  | 3.0                                                             | 2.4   | 1.9   |
|                 |              |                      | Complex with TF (Tig) | 78.4                                                | 66.3  | 51.2  | 3.8                                                             | 3.2   | 2.5   |
| P0AC51          | Zur          |                      | Monomer               | 133.4                                               | 112.7 | 87.1  | 13.6                                                            | 11.5  | 8.9   |

| UniProtKB A. N. | Protein name | Subcellular location | Subunit | $D_0 \left( \frac{\mu\text{m}^2}{\text{s}} \right)$ |       |       | $D_{\text{cyto}} \left( \frac{\mu\text{m}^2}{\text{s}} \right)$ |       |       |
|-----------------|--------------|----------------------|---------|-----------------------------------------------------|-------|-------|-----------------------------------------------------------------|-------|-------|
|                 |              |                      |         | 310 K                                               | 303 K | 293 K | 310 K                                                           | 303 K | 293 K |
| P0AC53          | Zwf          |                      | Monomer | 88.0                                                | 74.3  | 57.4  | 5.1                                                             | 4.3   | 3.4   |
